# Supplementary material
Source: publisher figshare collection journal article supplement (https://frontiersin.figshare.com/ndownloader/files/18162098)

Supplementary Information 1:  
This supplementary figure shows an overview of all Phe-derived metabolites (n=172) detected in the above shown publication. Each page illustrates the time course (mean values) of the metabolite abundances in the different treatments and/or genotypes respectively. Moreover, "QTL" or "TR+/-" labels indicate if there is a significant difference between the time points and/or genotypes. Please refer to the materials and methods part of the main text for the calculation of these indicator labels.

Name or ID of the metabolite

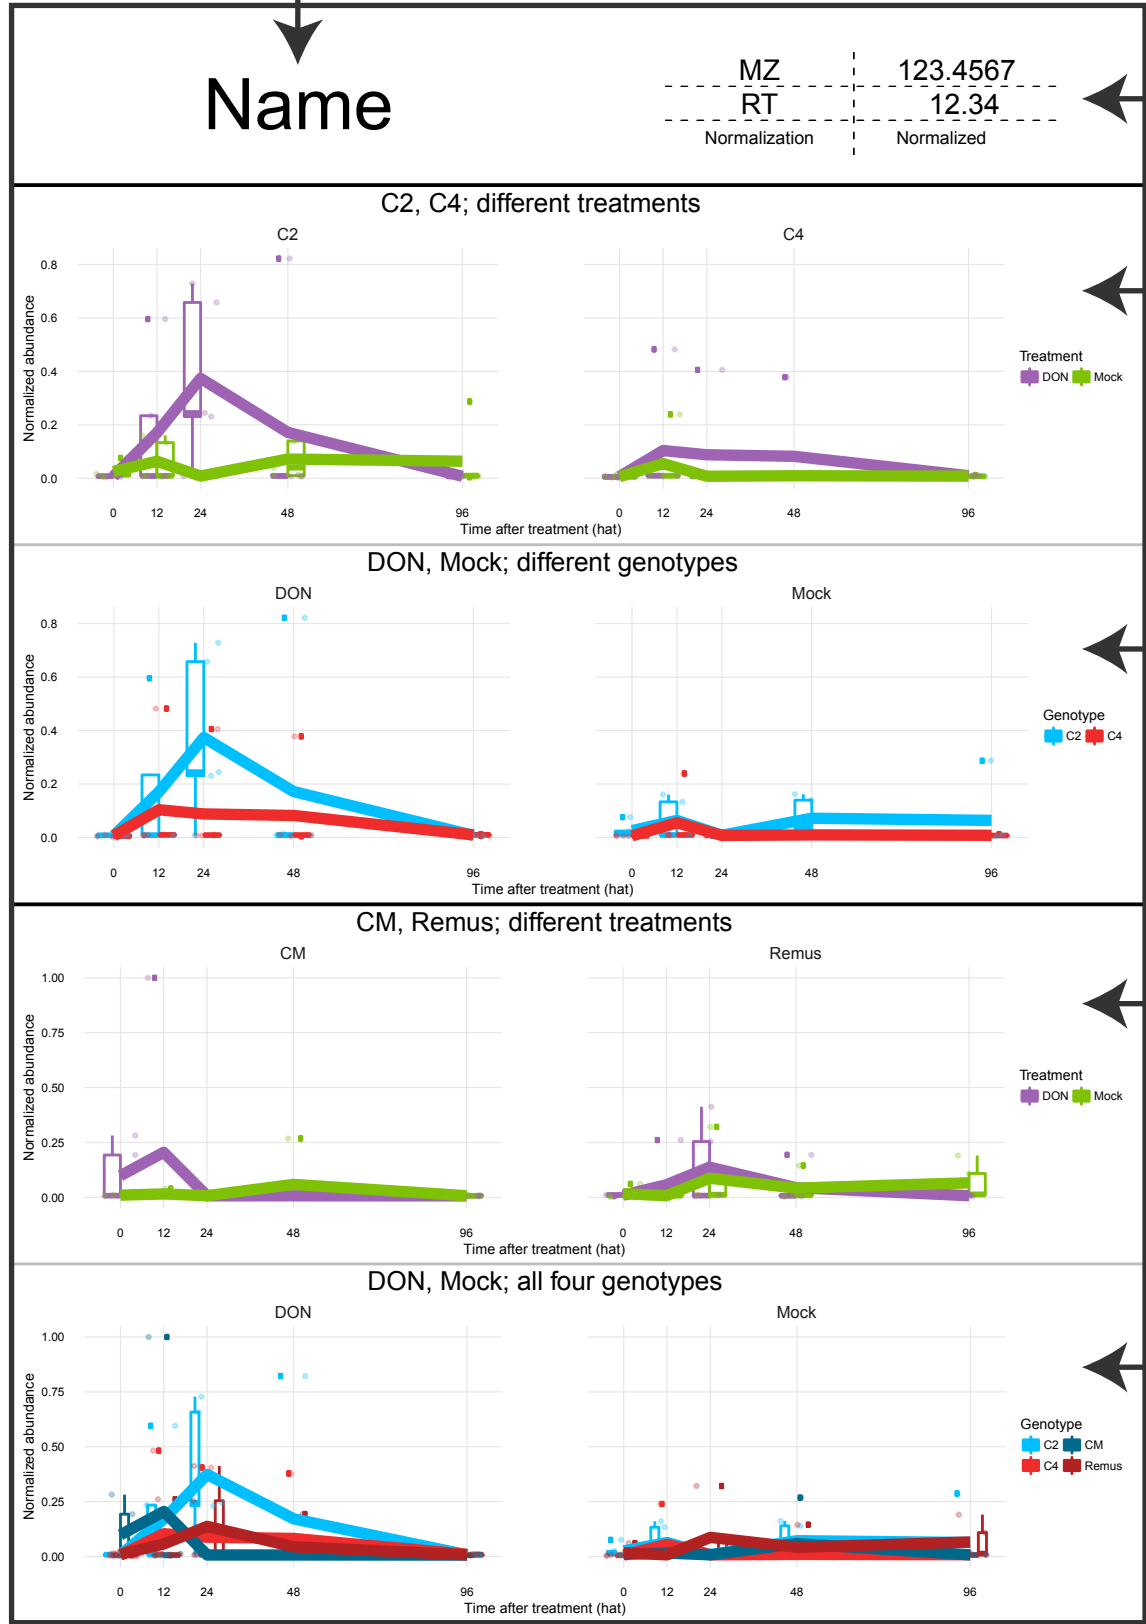

Meta- and statistical information of the compound

Time course of the C2 and C4 genotypes for the DON- and Mock-treatments

Overlay of C2 and C4 for the DON- and Mock-treatments separately

Overview of the two parent lines CM and Remus for the DON- and Mock-treatments

Pverlay of the two parent lines CM and Remus for the DON- and Mock-treatments separately

# A.3

Annotated as HCA derivative  
(3 database hits)

|                |                |
|----------------|----------------|
| MZ             | 166.0866       |
| RT             | 4.11 min       |
| Normalization  | Not normalized |
| Cluster        | –              |
| Cn total / Phe | 9 / 9          |

## C2, C4; different treatments

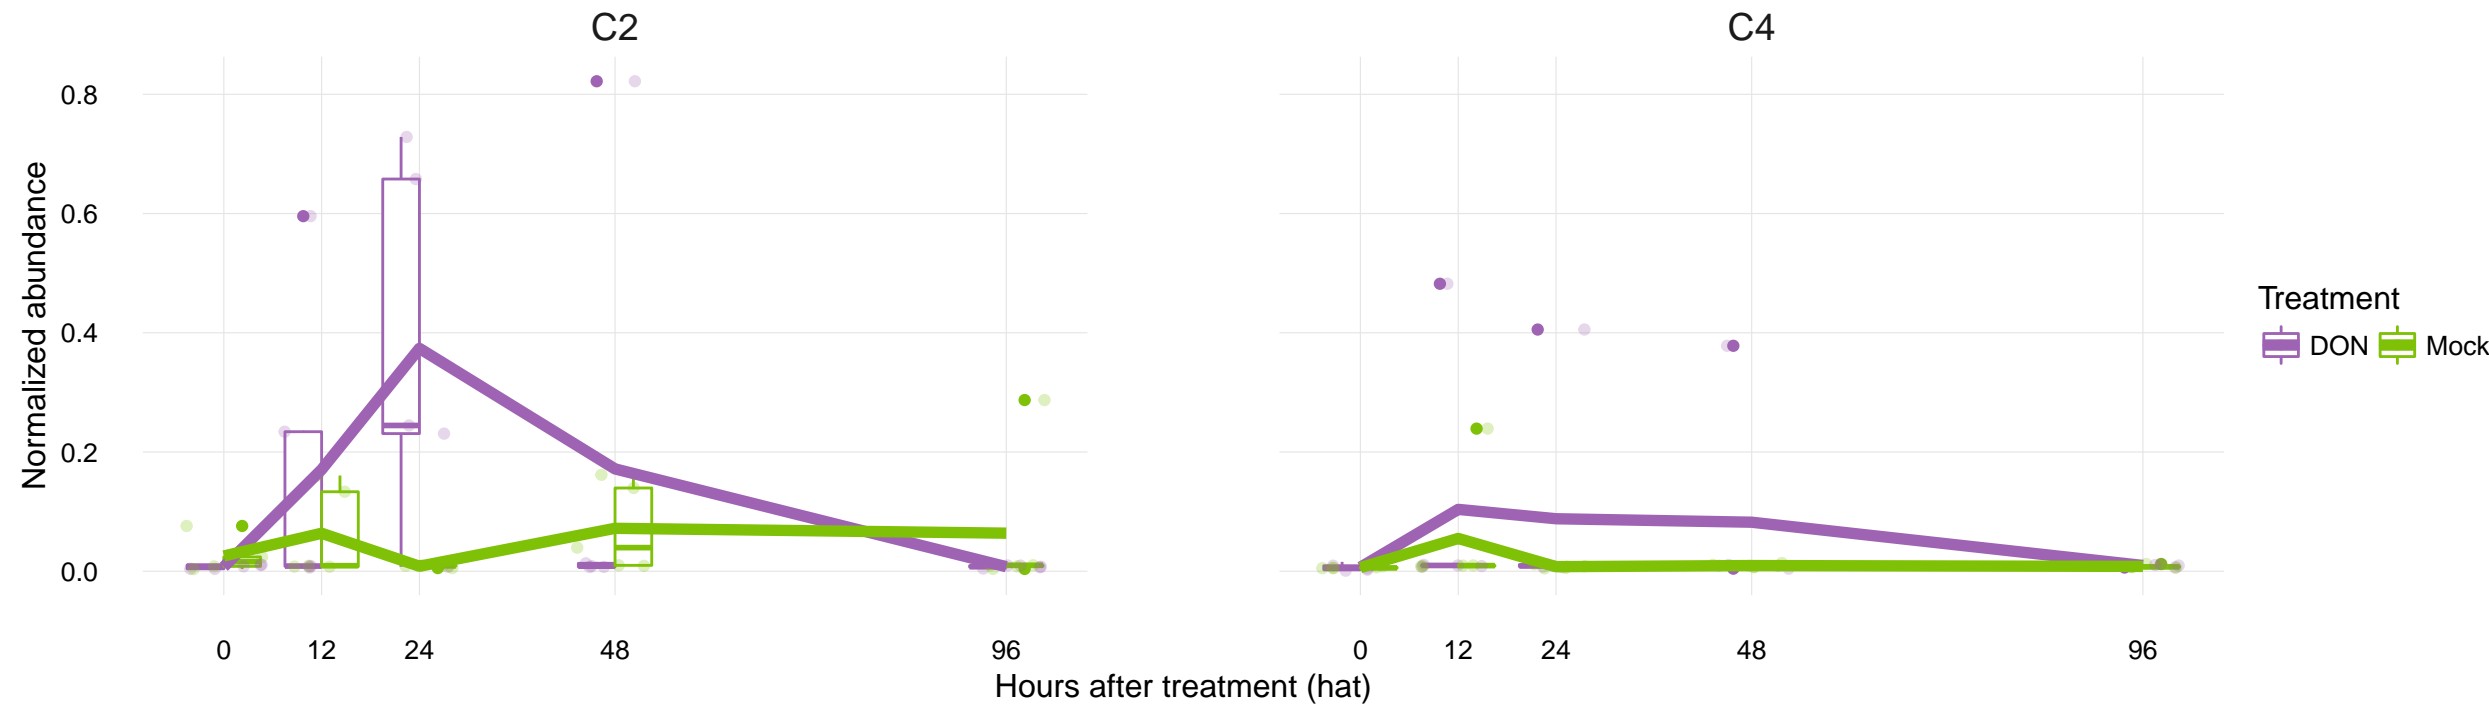

## DON, Mock; different genotypes

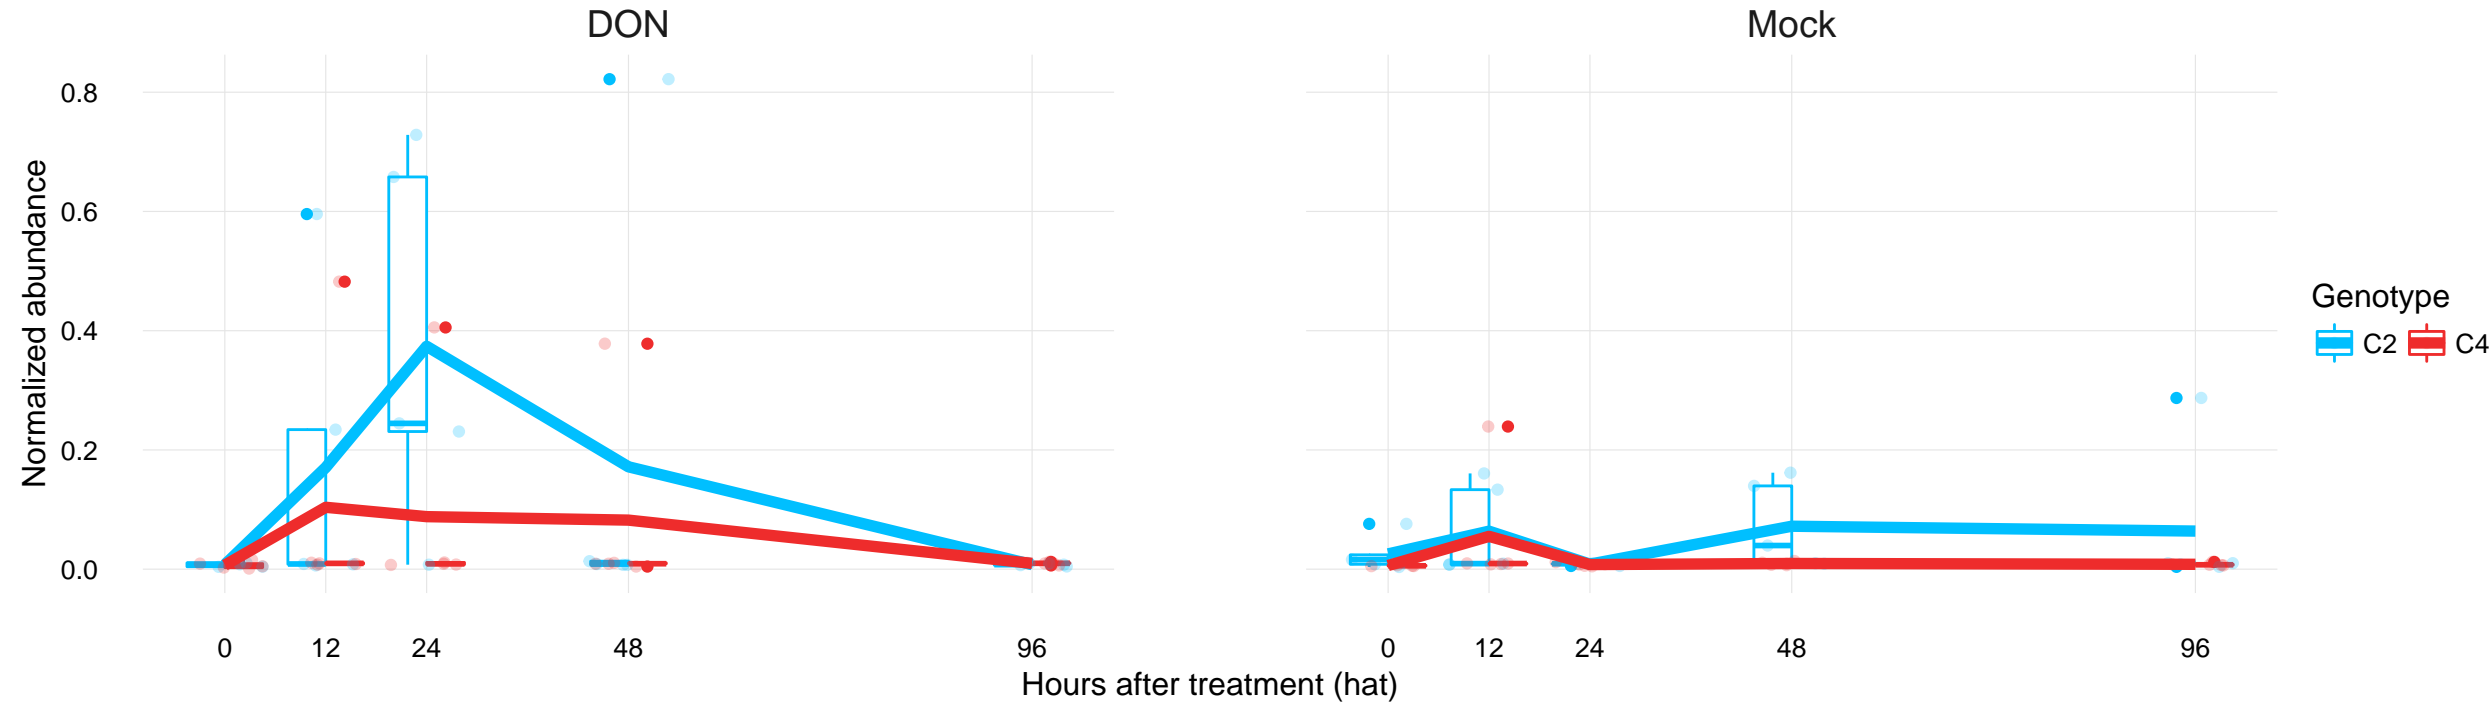

## CM, Remus; different treatments

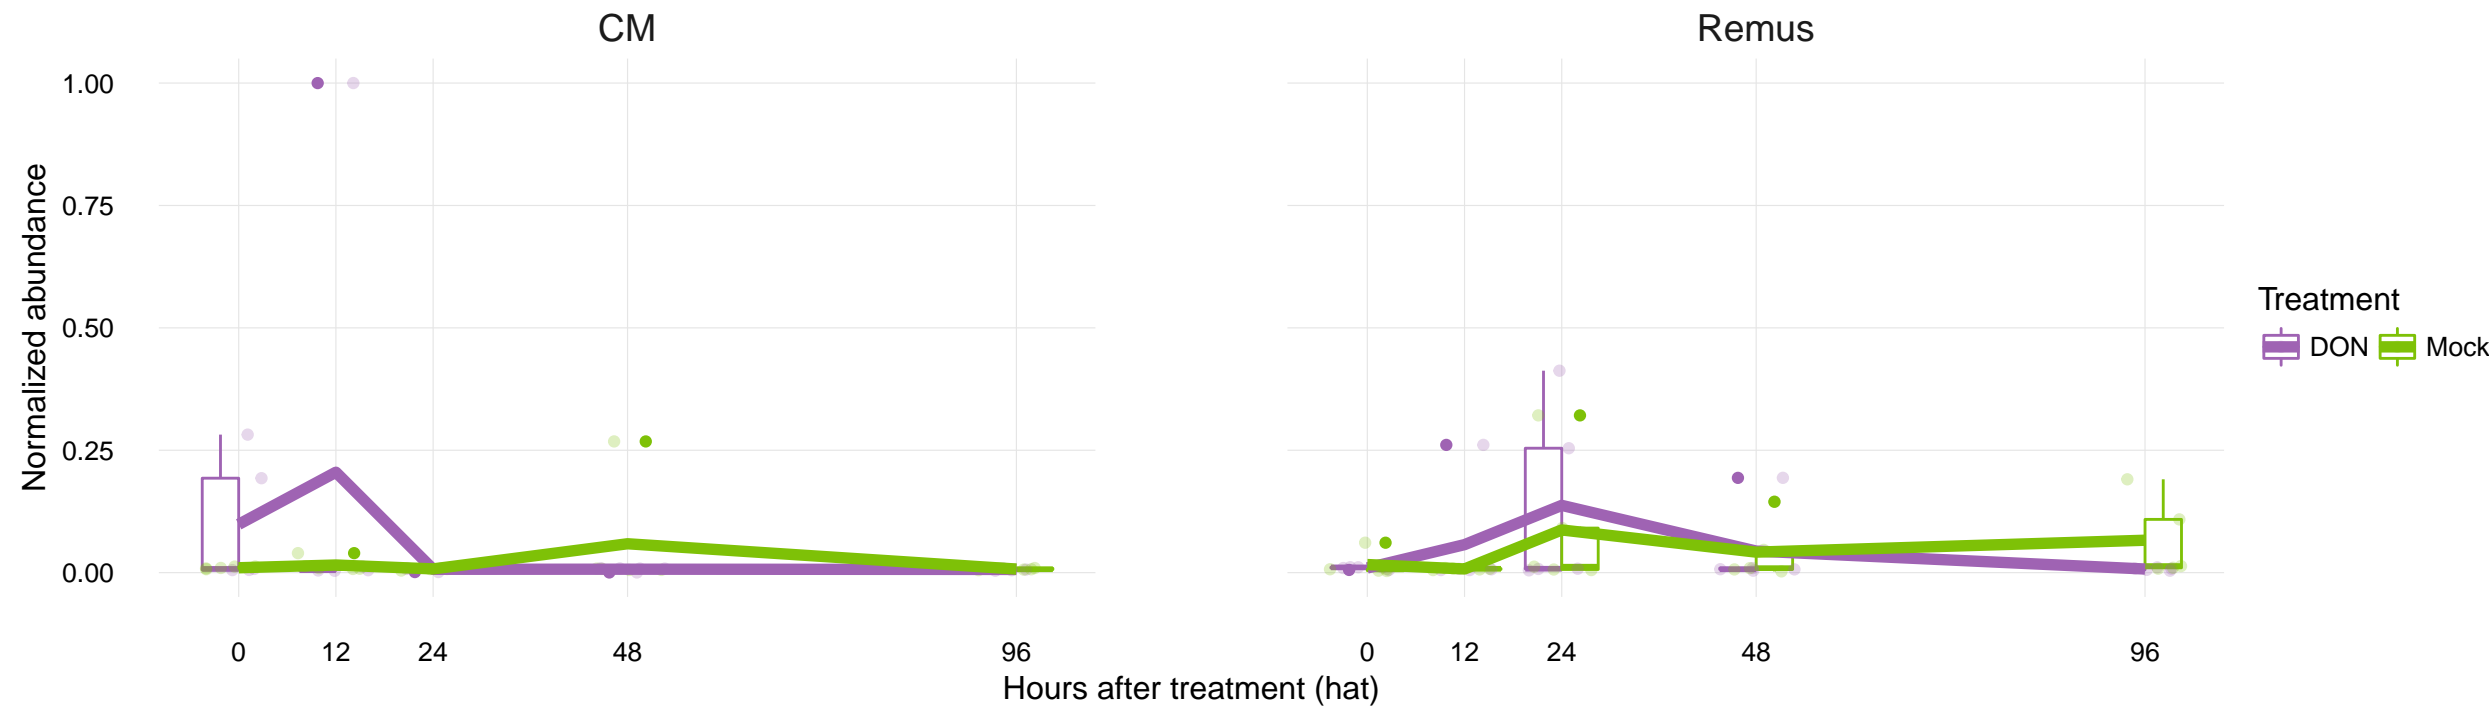

## DON, Mock; all four genotypes

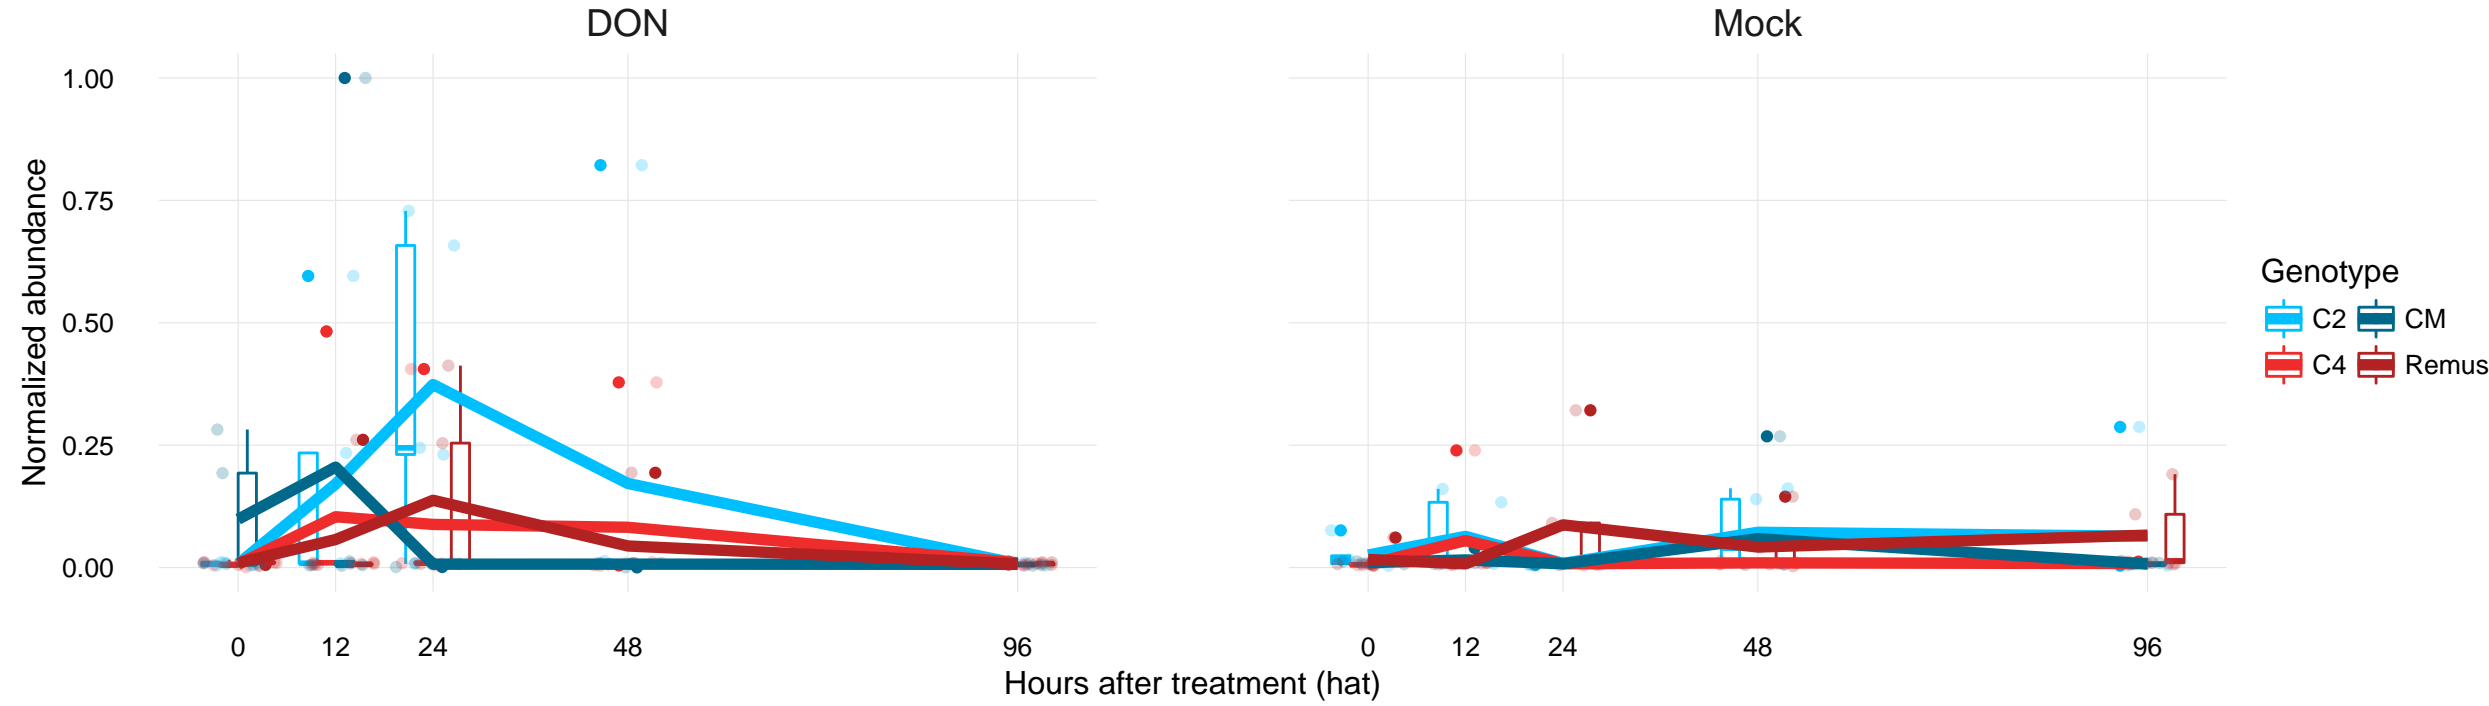

# A.4

Annotated as HCA derivative  
(3 database hits)

|                |                |
|----------------|----------------|
| MZ             | 149.06         |
| RT             | 4.12 min       |
| Normalization  | Not normalized |
| Cluster        | –              |
| Cn total / Phe | 9 / 9          |

## C2, C4; different treatments

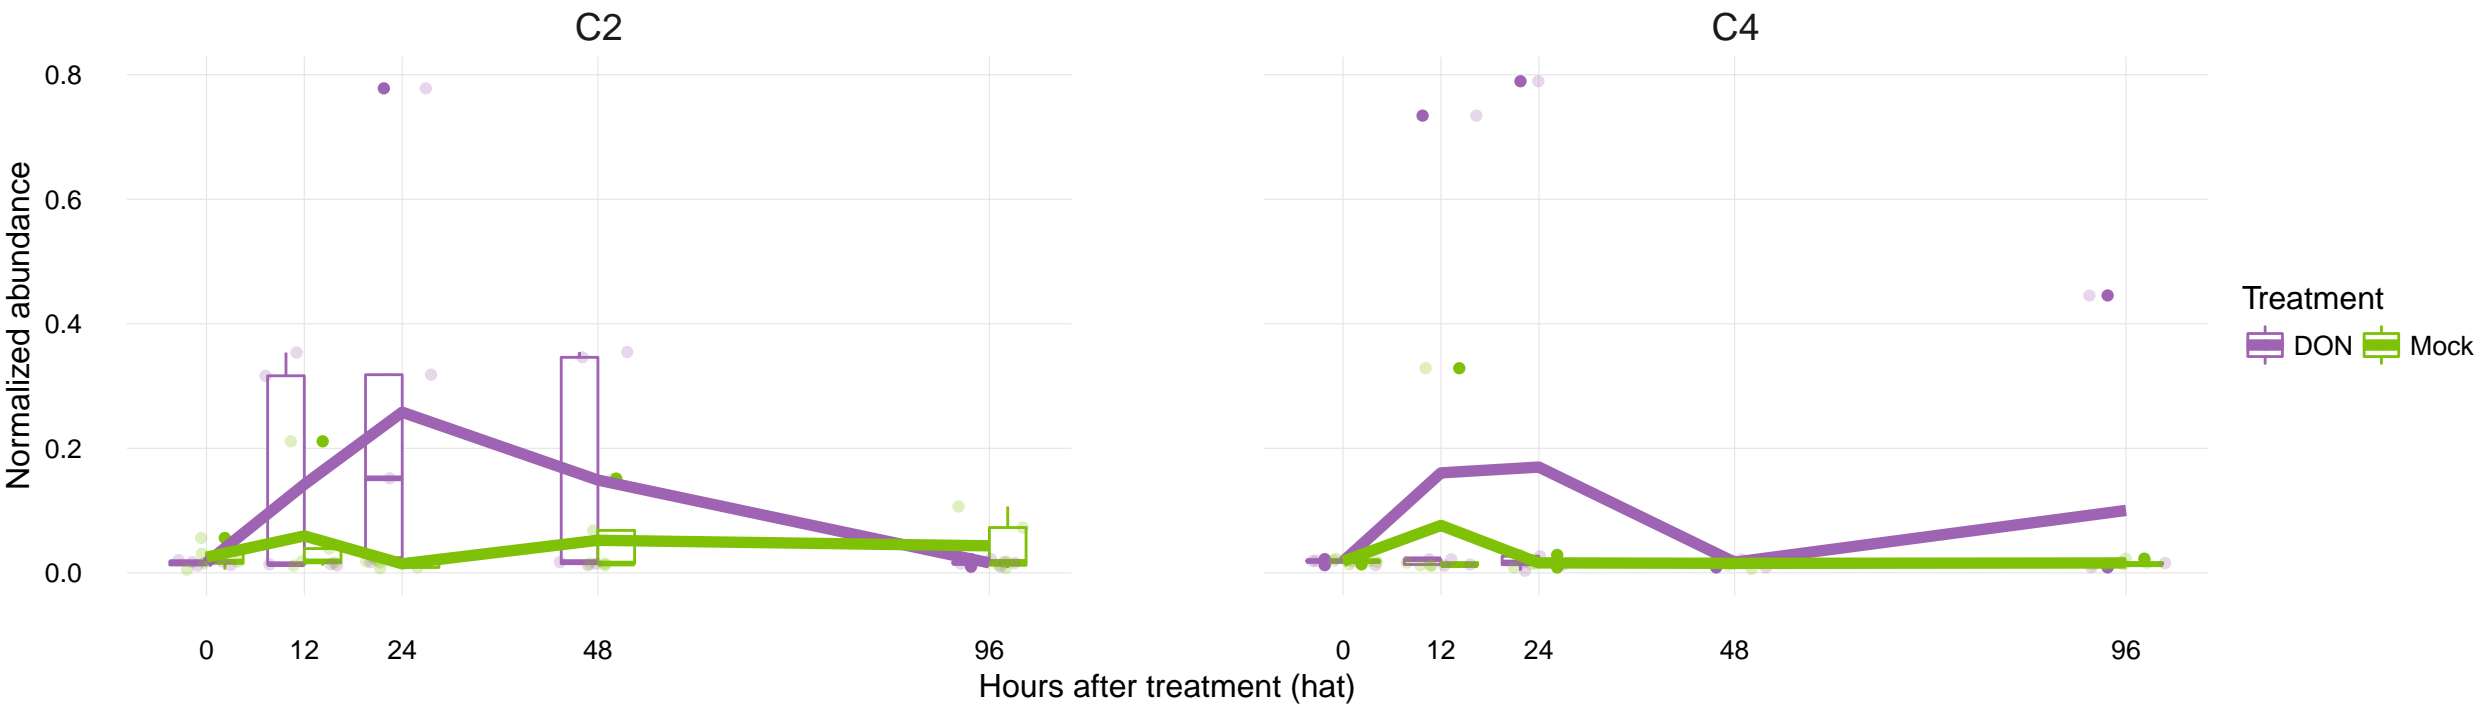

## DON, Mock; different genotypes

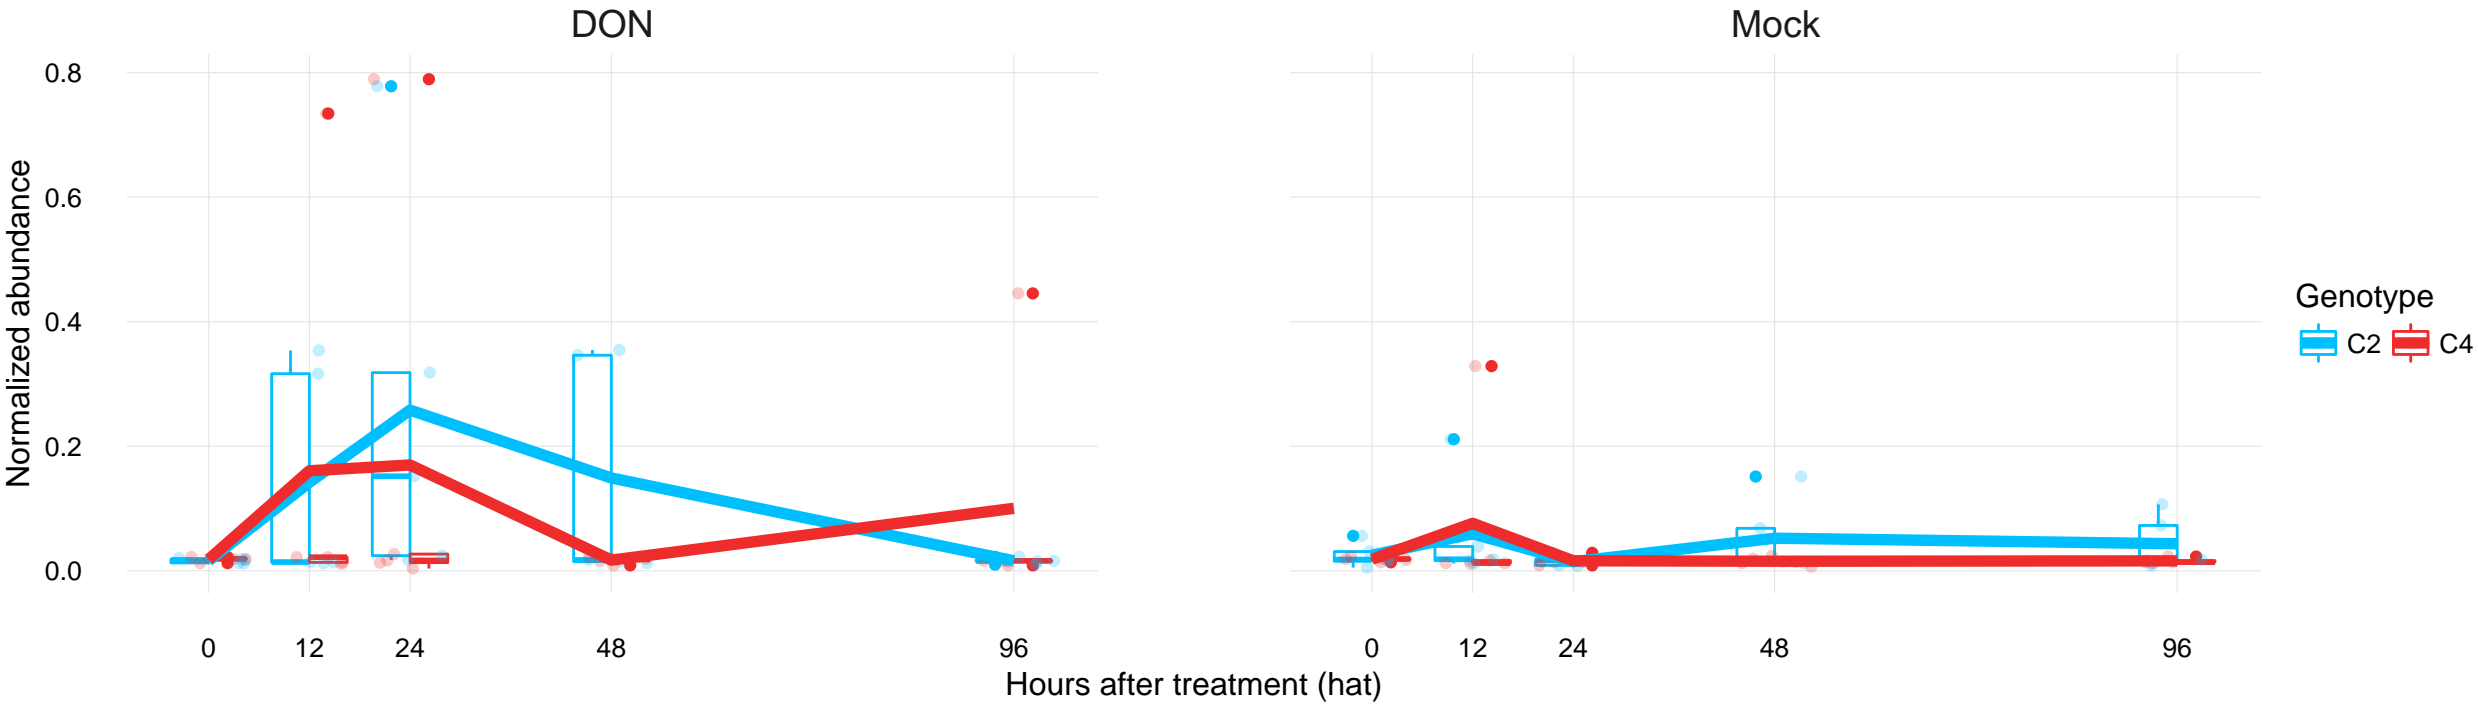

## CM, Remus; different treatments

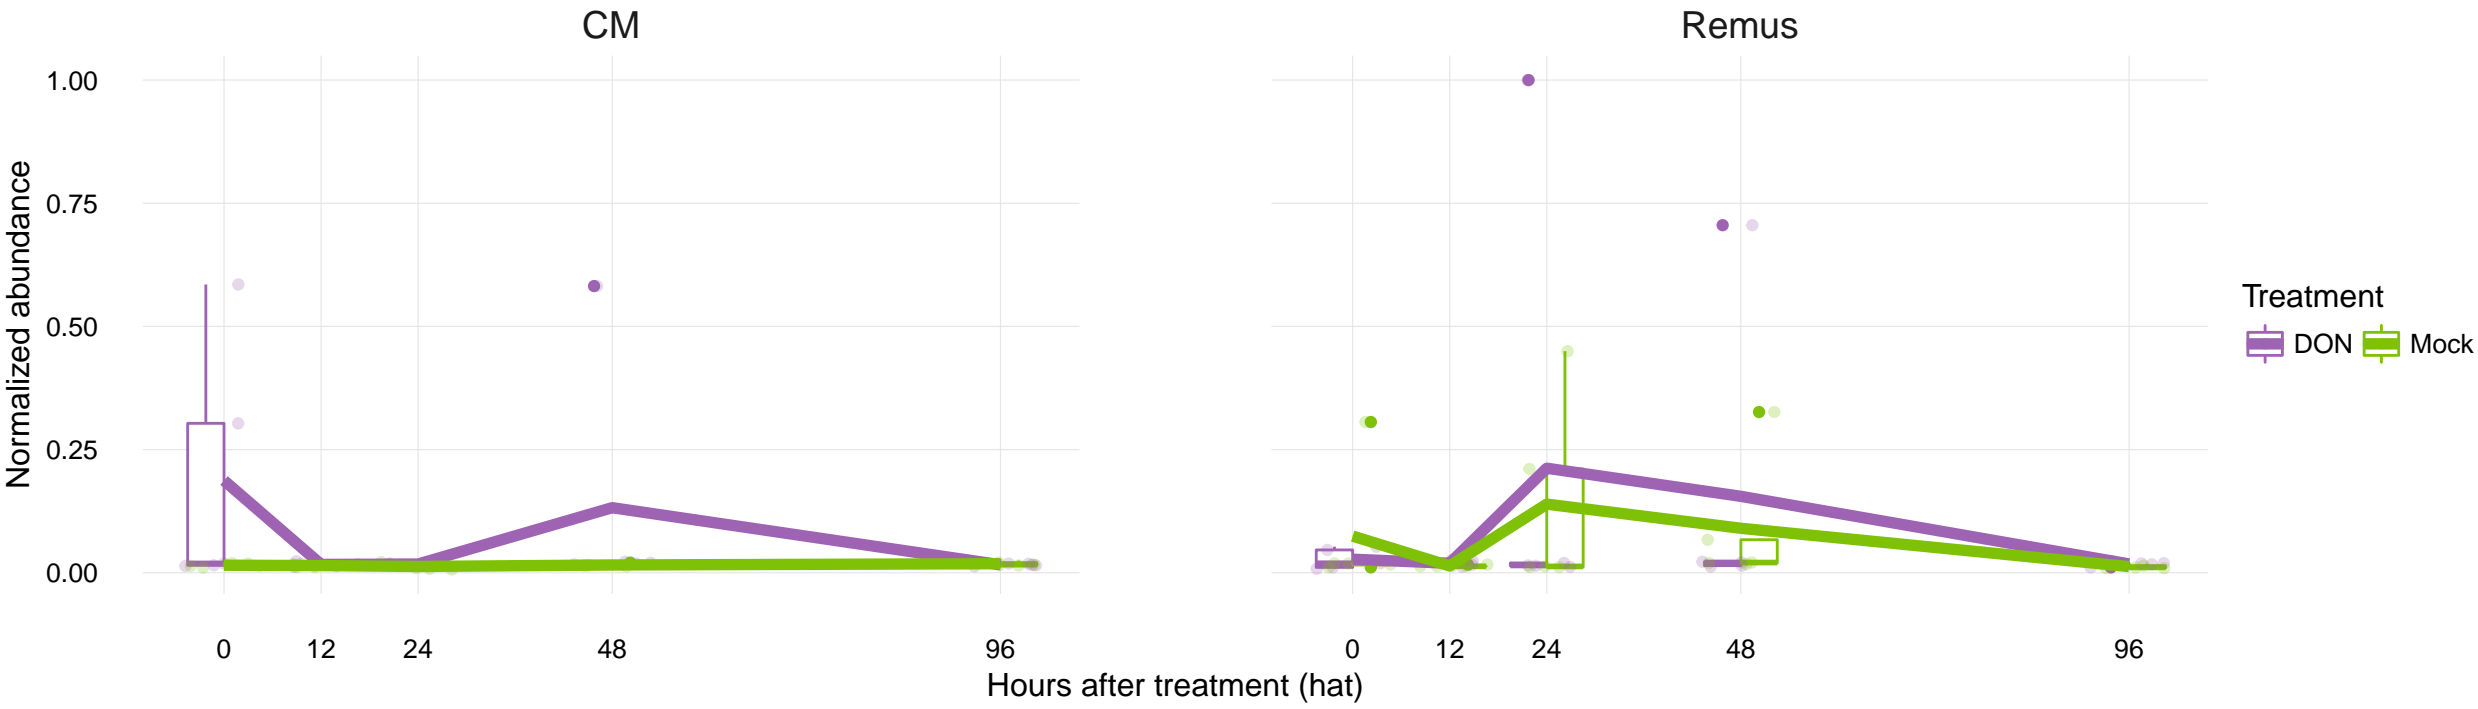

## DON, Mock; all four genotypes

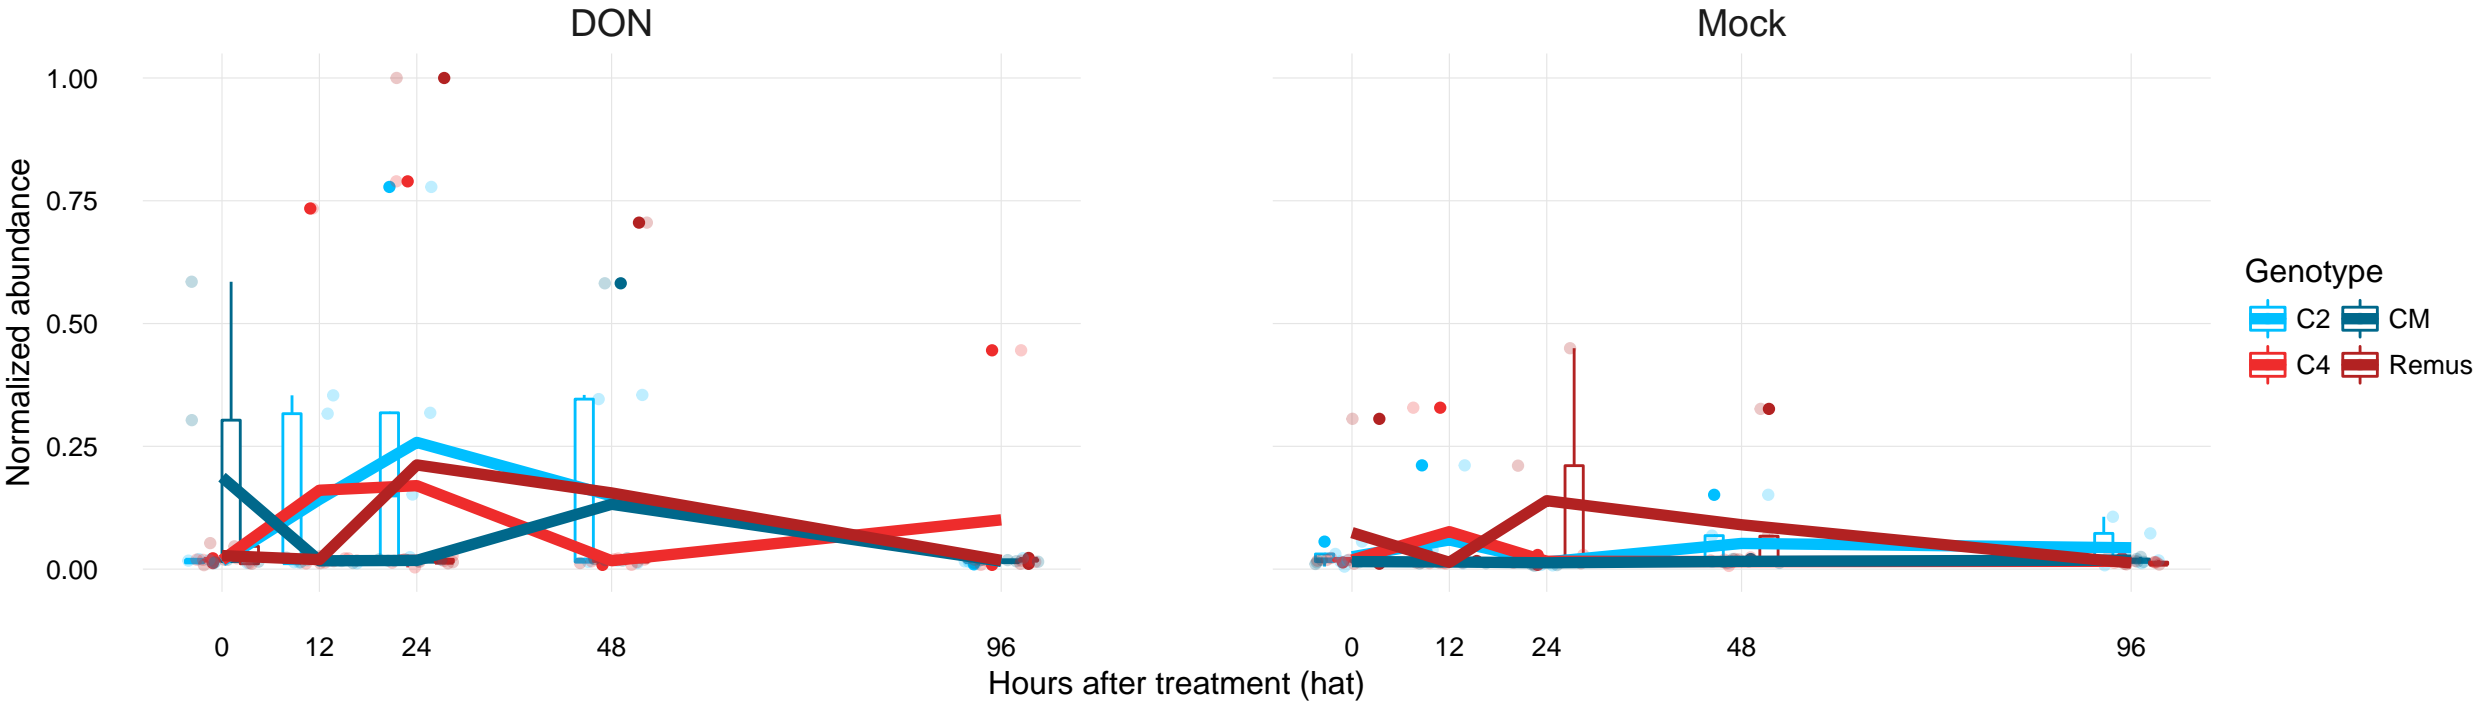

# Ferulic acid

Identified metabolite (level 1)

|                |                                                |
|----------------|------------------------------------------------|
| MZ             | 195.0653                                       |
| RT             | 14.05 min                                      |
| Normalization  | Indirectly via surrogate<br>in the KPX samples |
| Cluster        | –                                              |
| Cn total / Phe | 10 /                                           |

C2, C4; different treatments

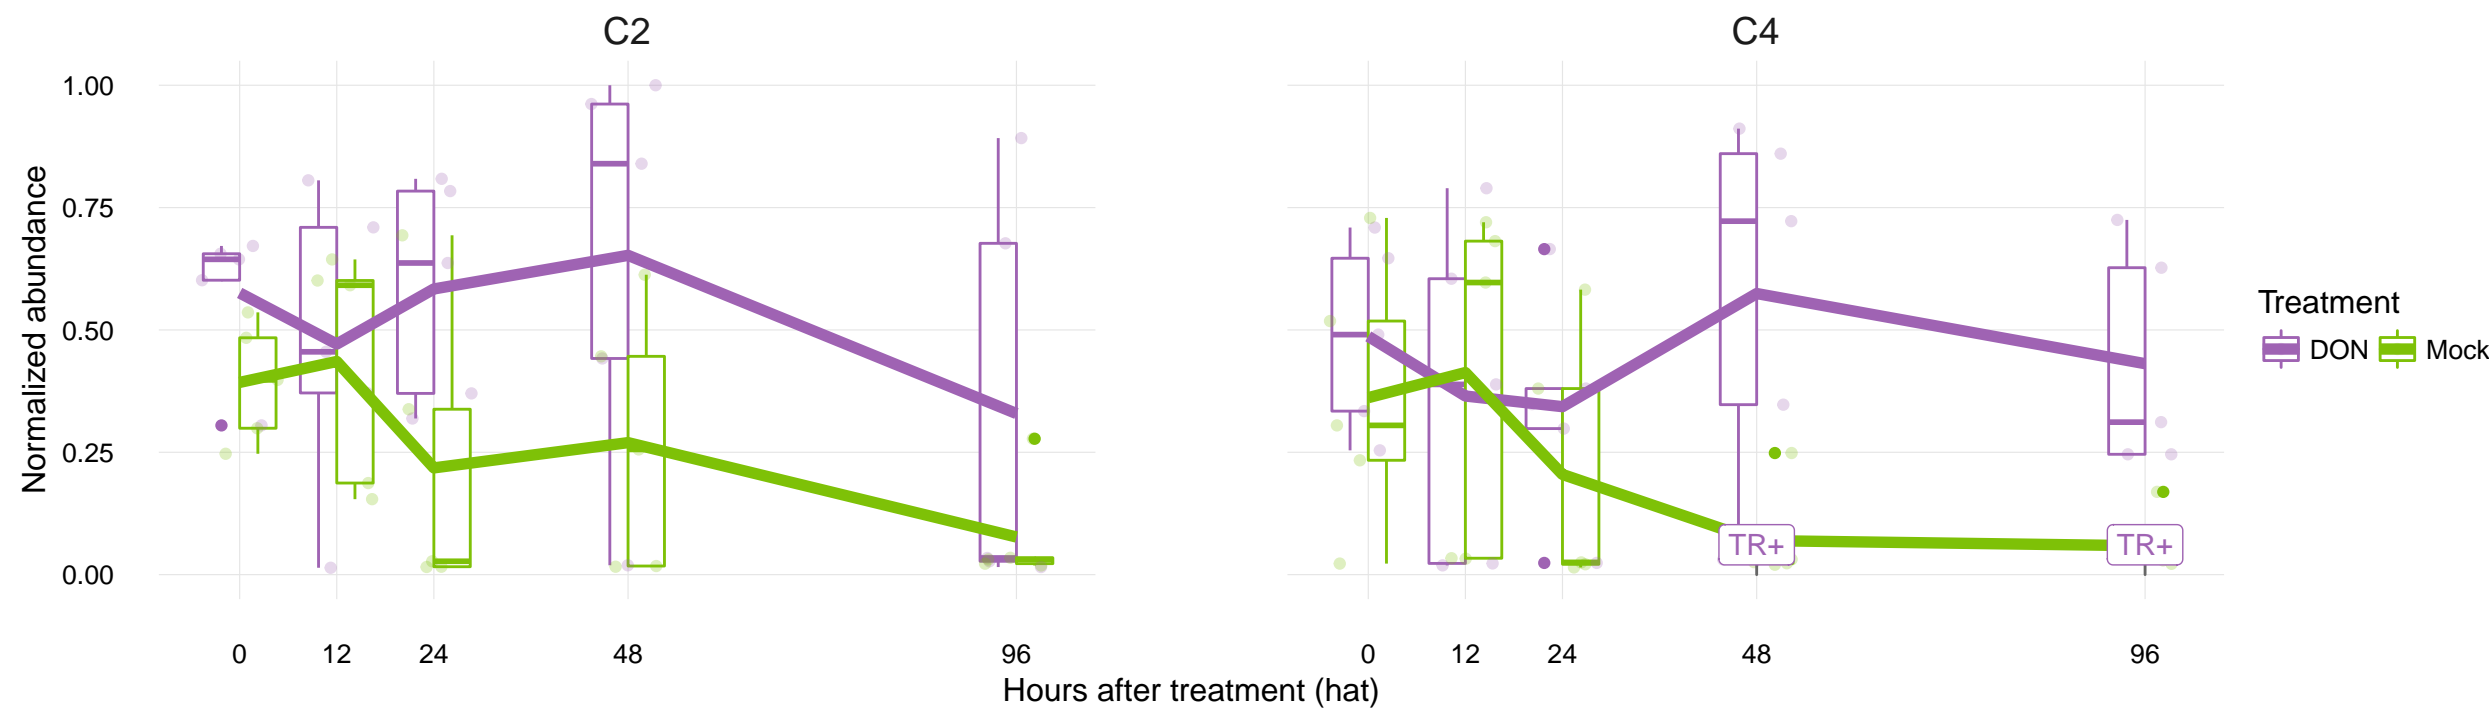

DON, Mock; different genotypes

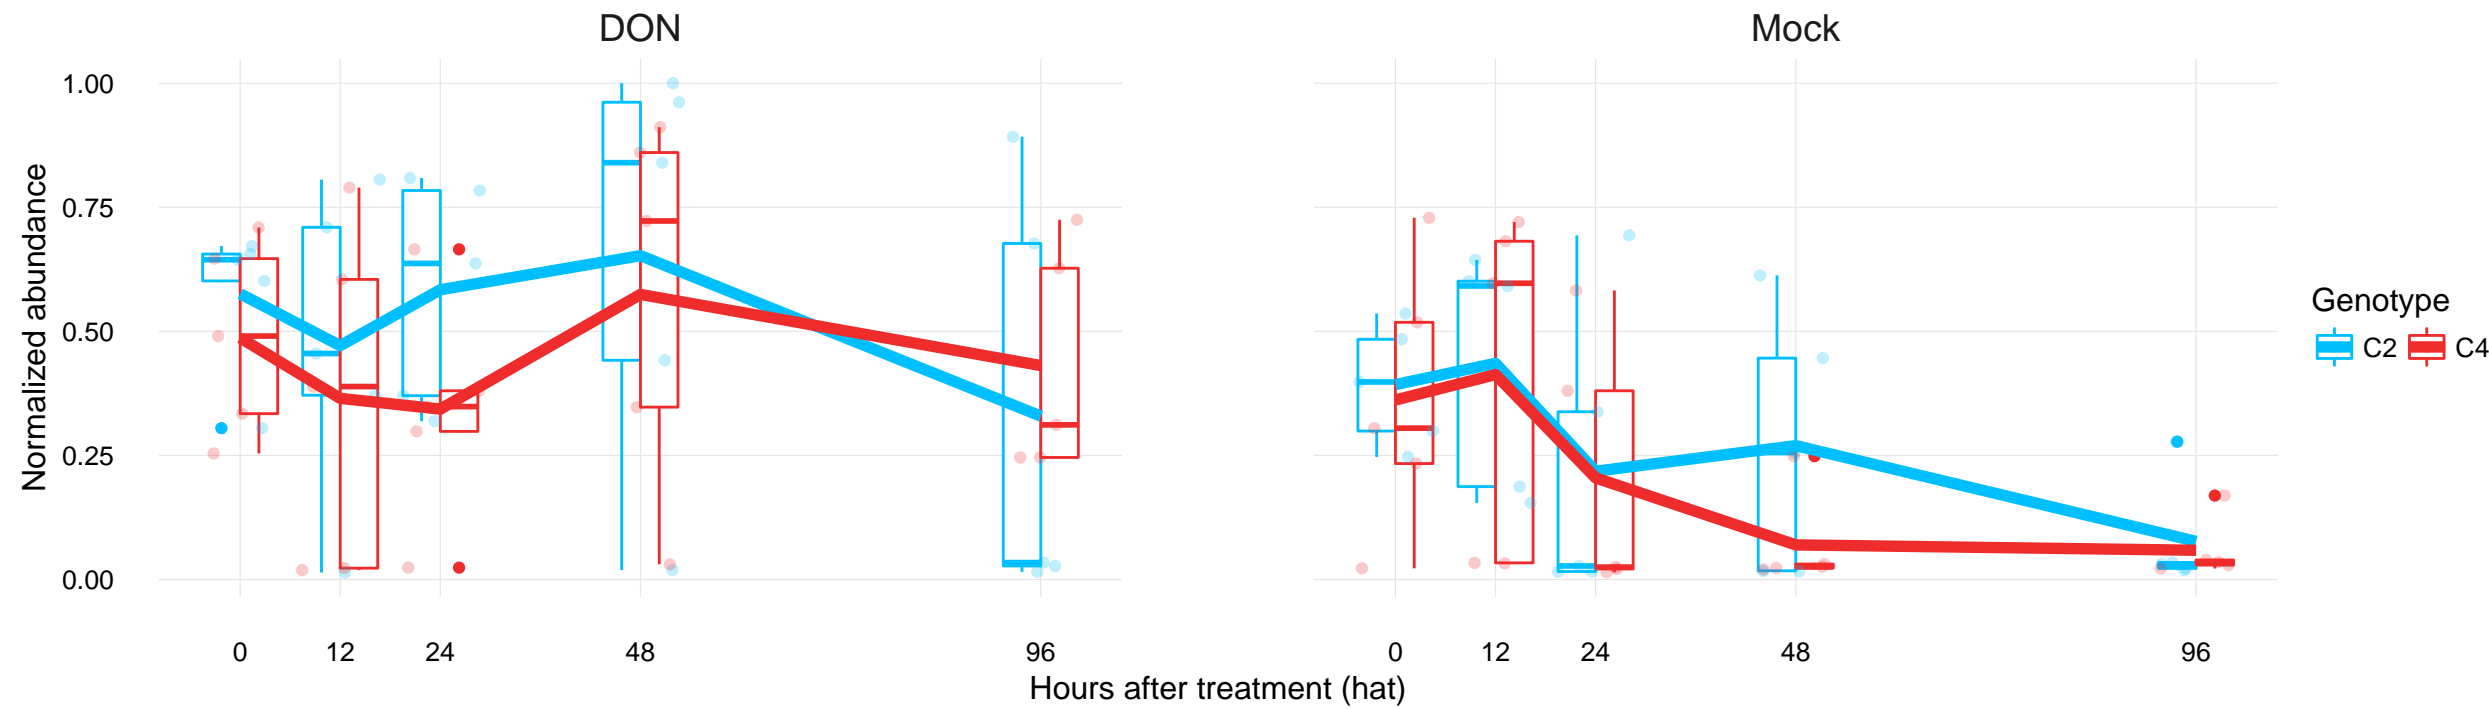

CM, Remus; different treatments

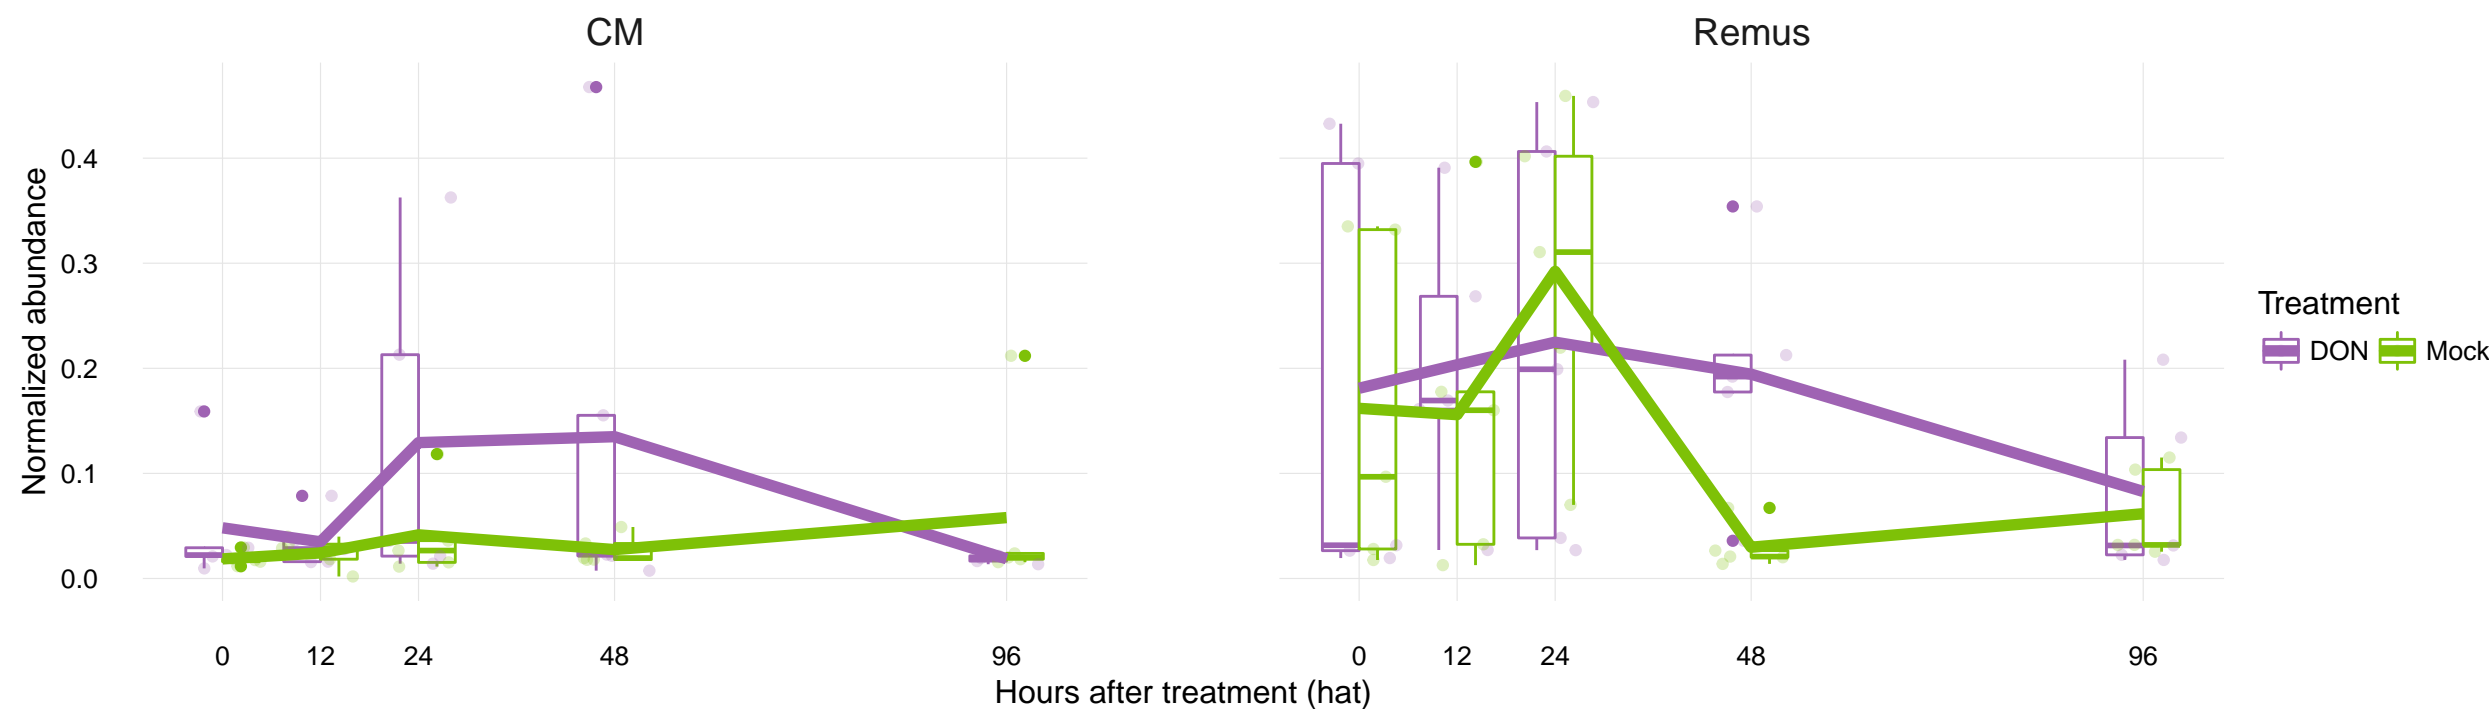

DON, Mock; all four genotypes

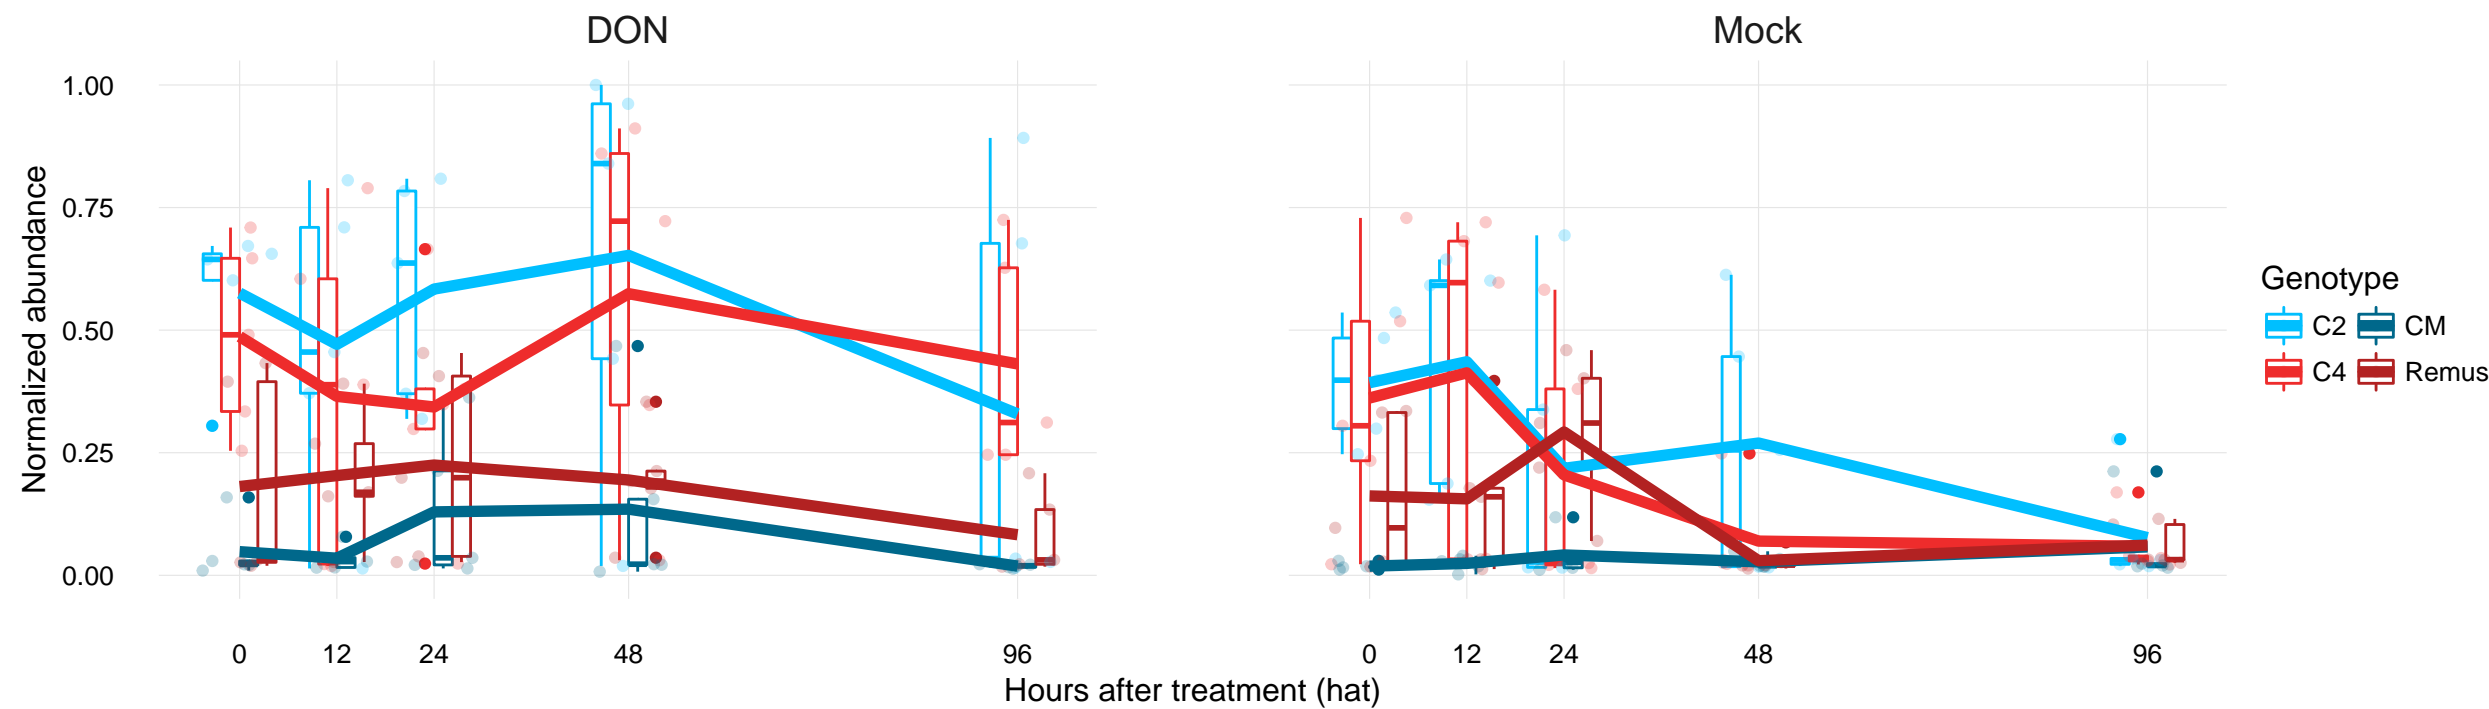



# A.1

Annotated as others (Phenol)  
(1 database hit)

|                |                |
|----------------|----------------|
| MZ             | 144.0656       |
| RT             | 3.02 min       |
| Normalization  | Not normalized |
| Cluster        | –              |
| Cn total / Phe | 6 /            |

## C2, C4; different treatments

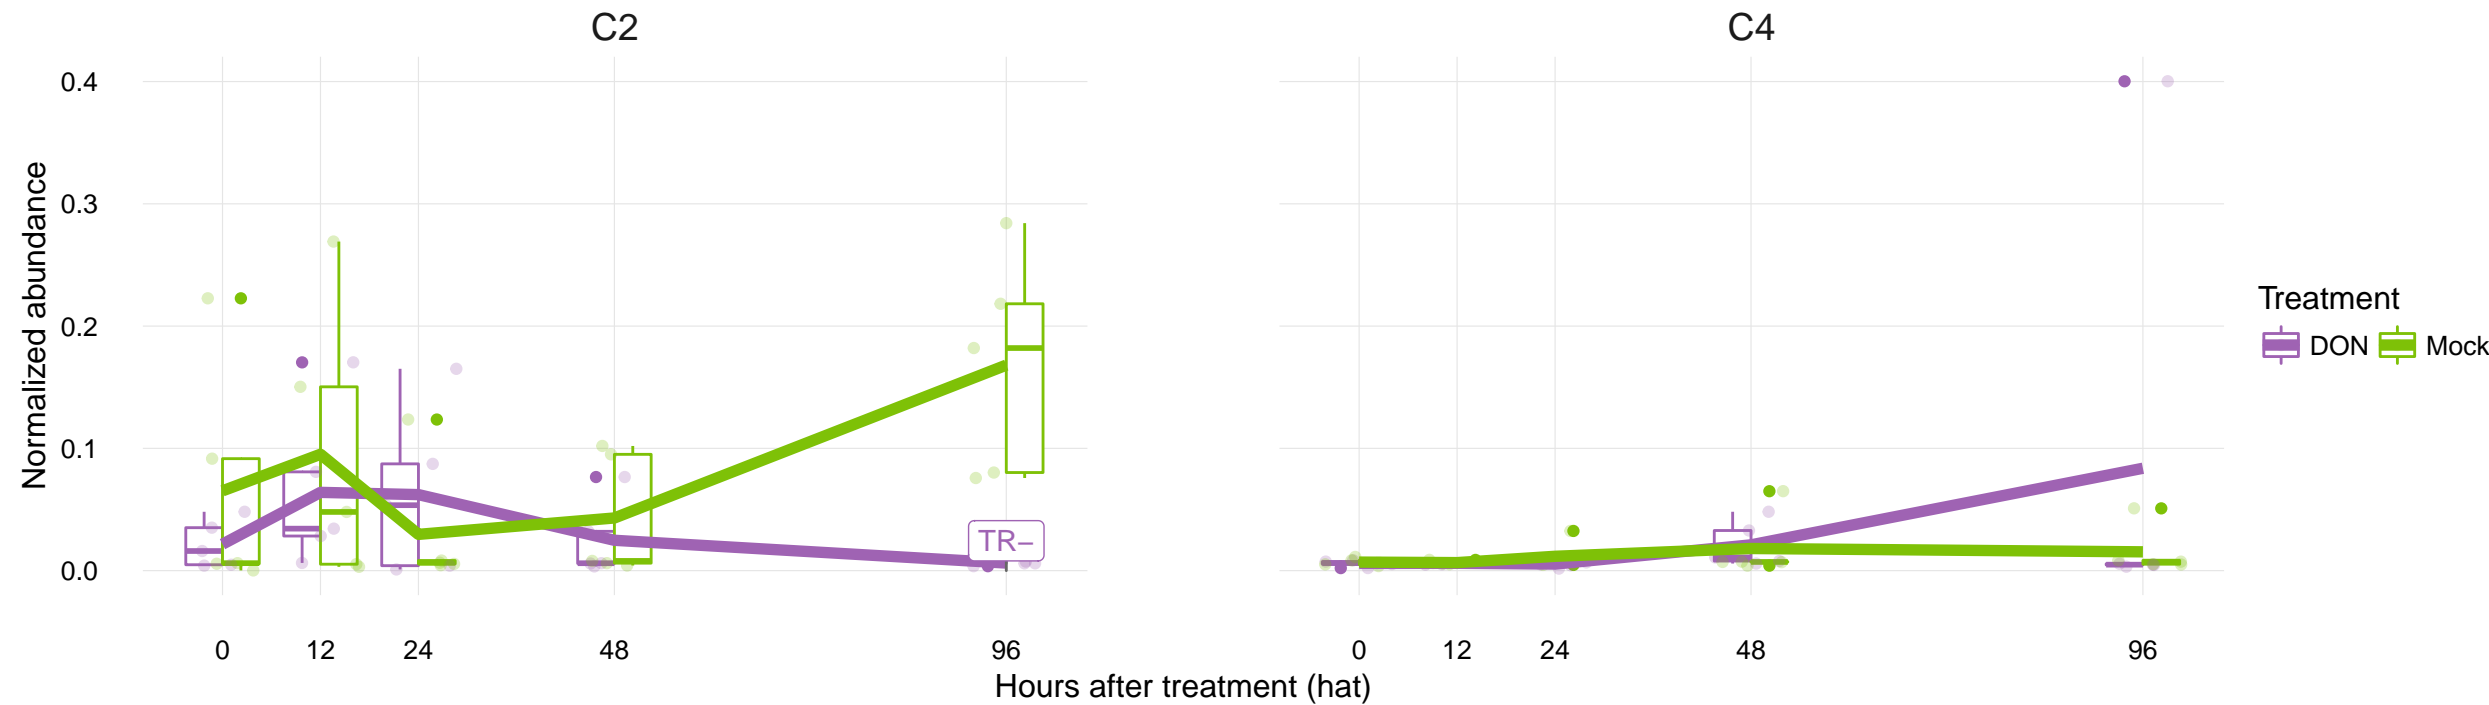

## DON, Mock; different genotypes

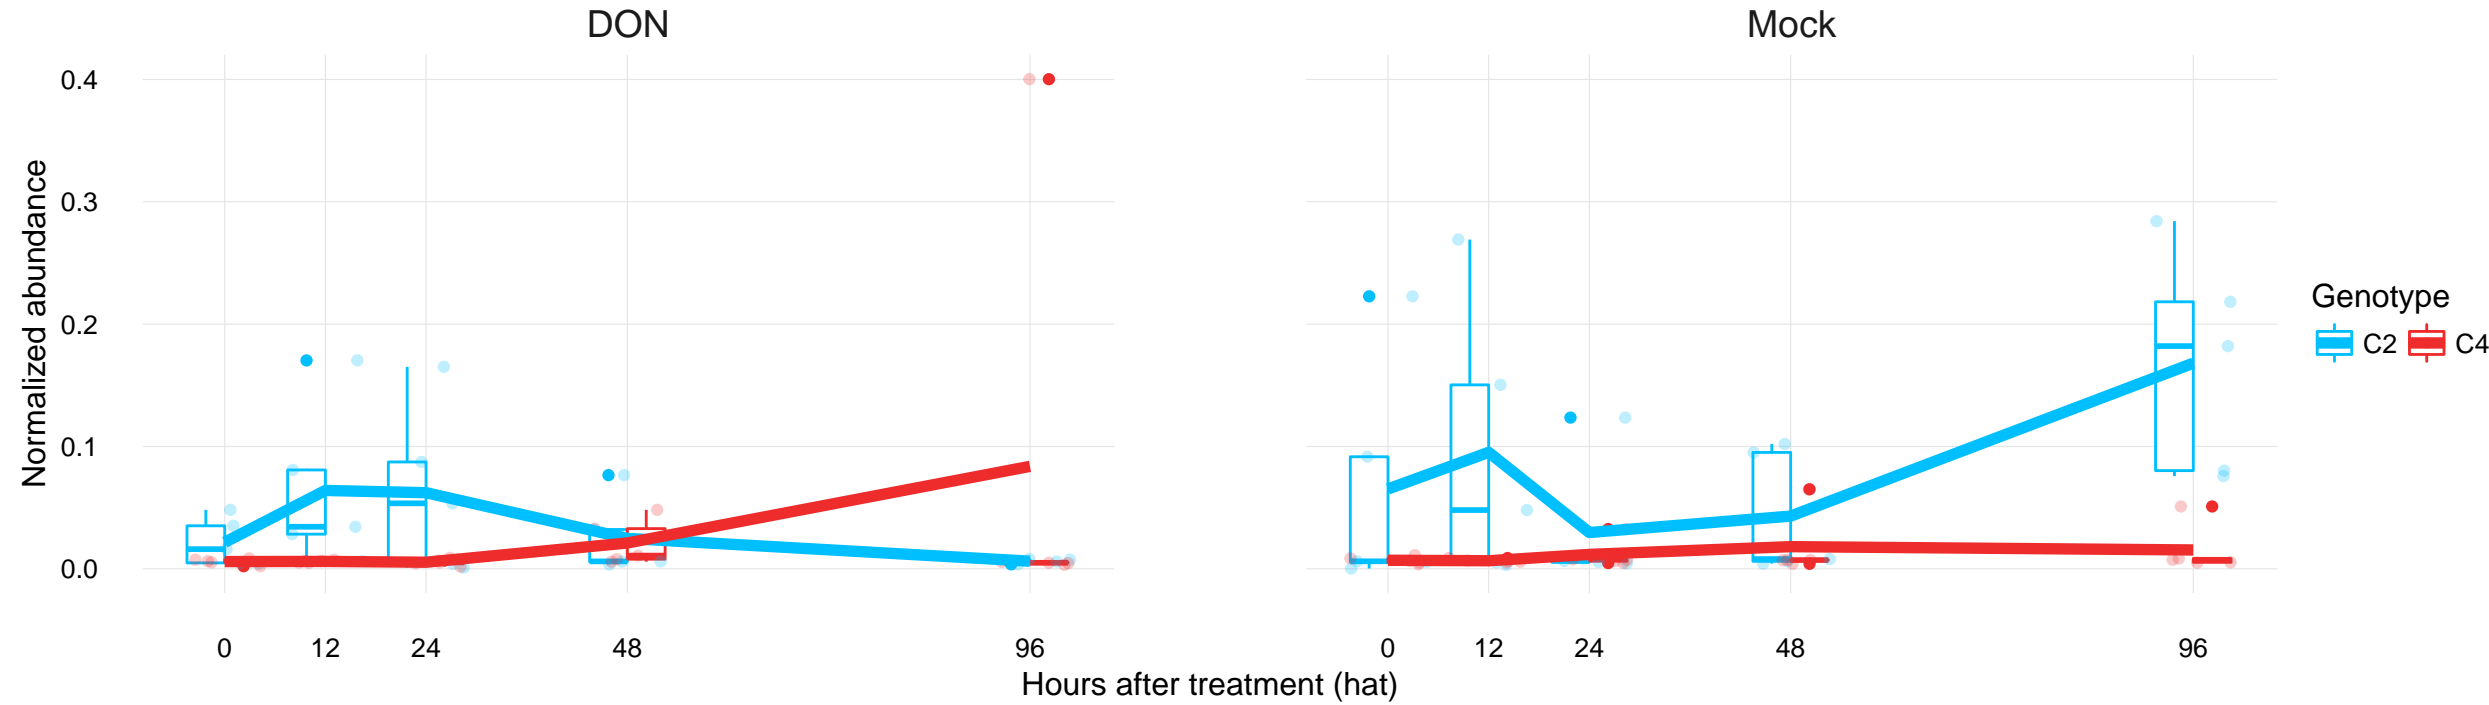

## CM, Remus; different treatments

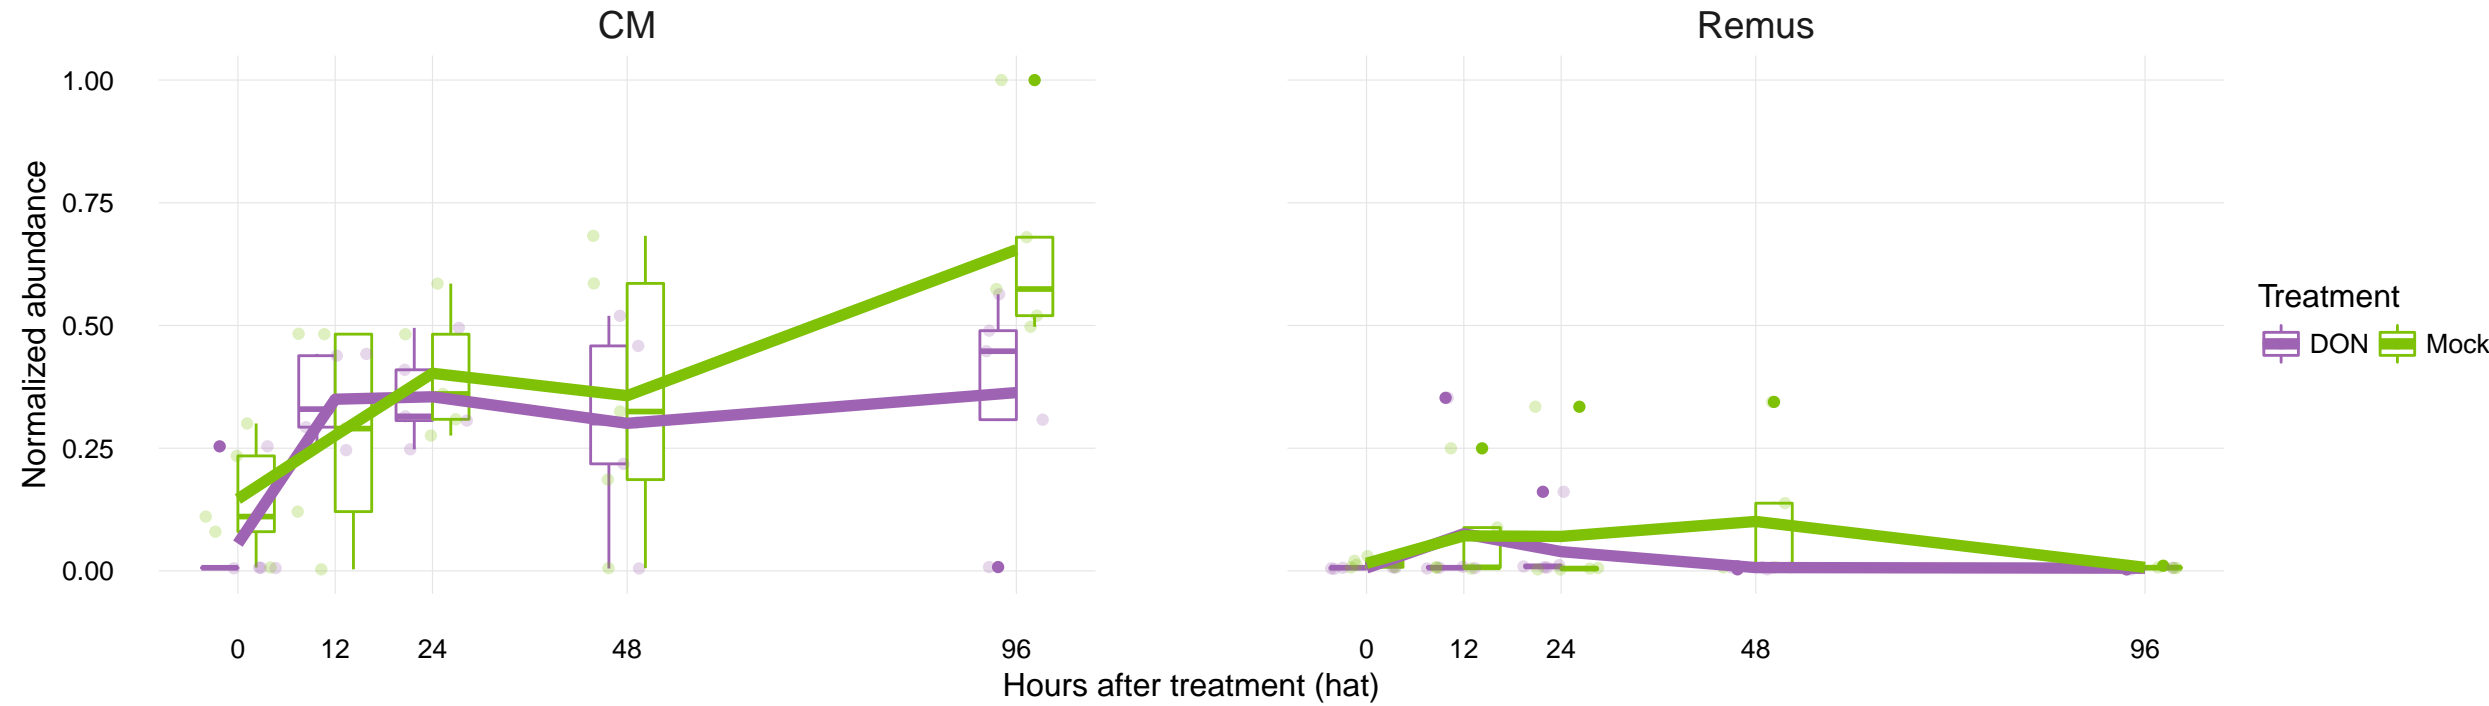

## DON, Mock; all four genotypes

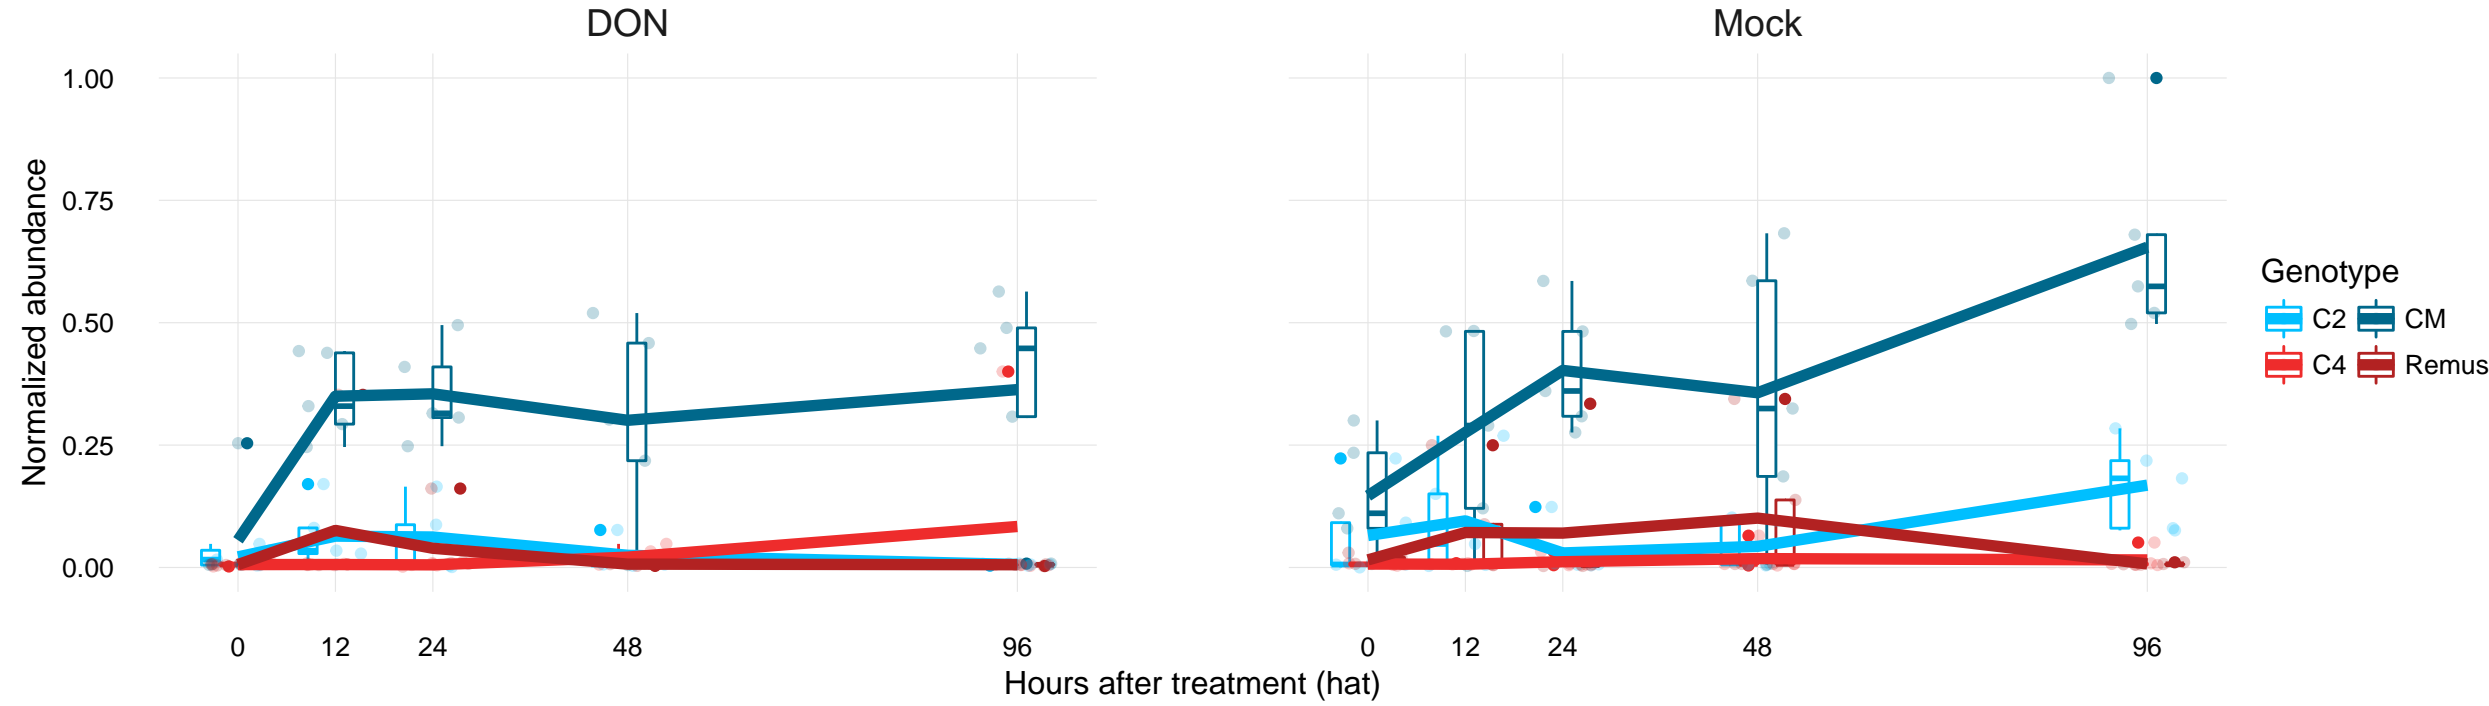

# p-coumaric acid

Identified metabolite (level 1)

|                |                                             |
|----------------|---------------------------------------------|
| MZ             | 165.0546                                    |
| RT             | 13.41 min                                   |
| Normalization  | Indirectly via surrogate in the KPX samples |
| Cluster        | –                                           |
| Cn total / Phe | 9 /                                         |

C2, C4; different treatments

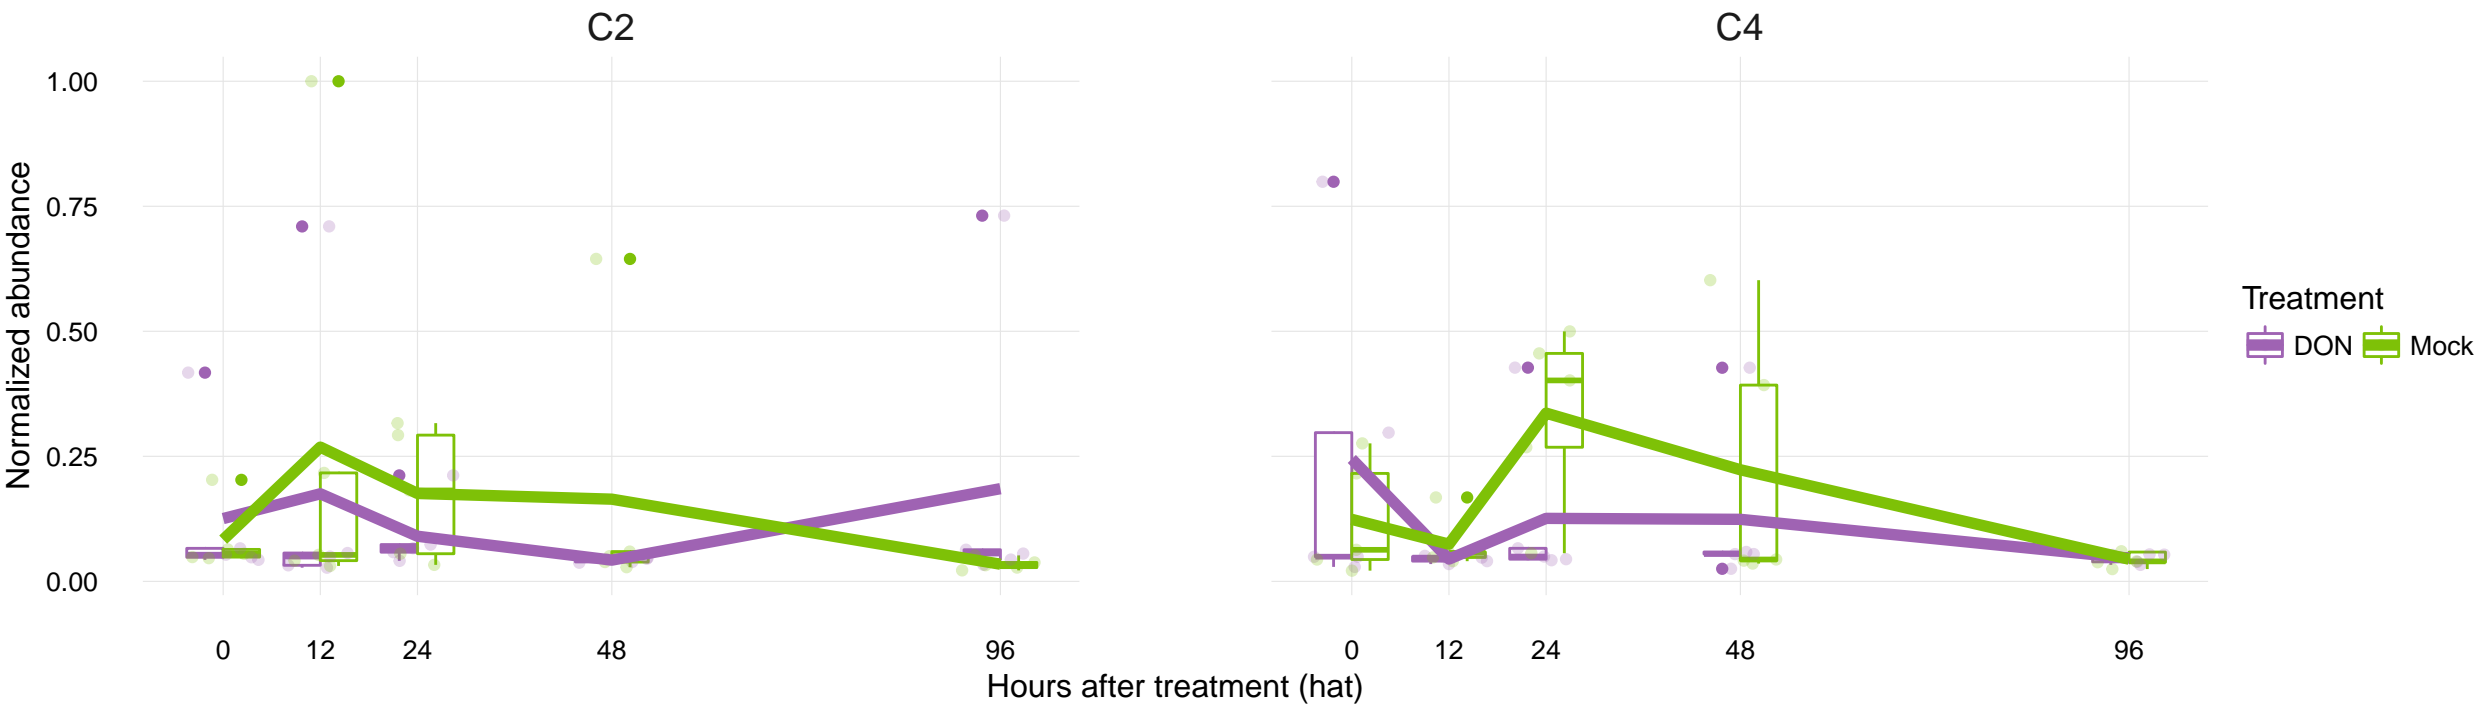

DON, Mock; different genotypes

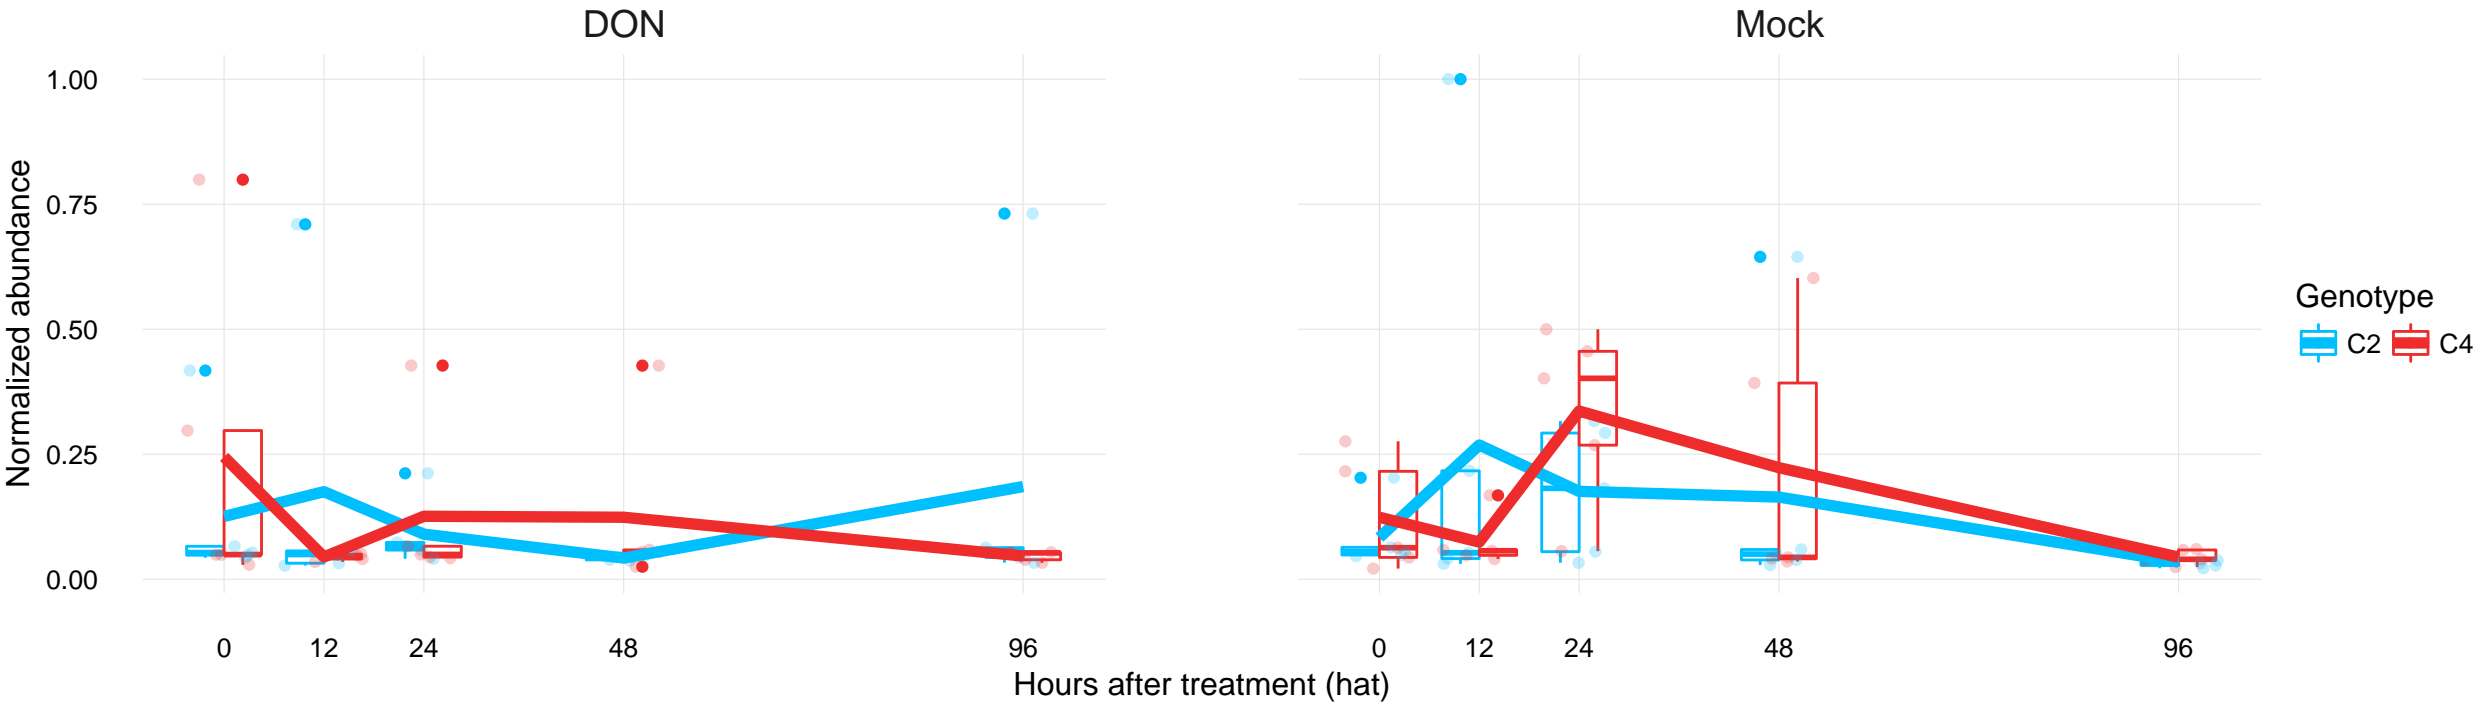

CM, Remus; different treatments

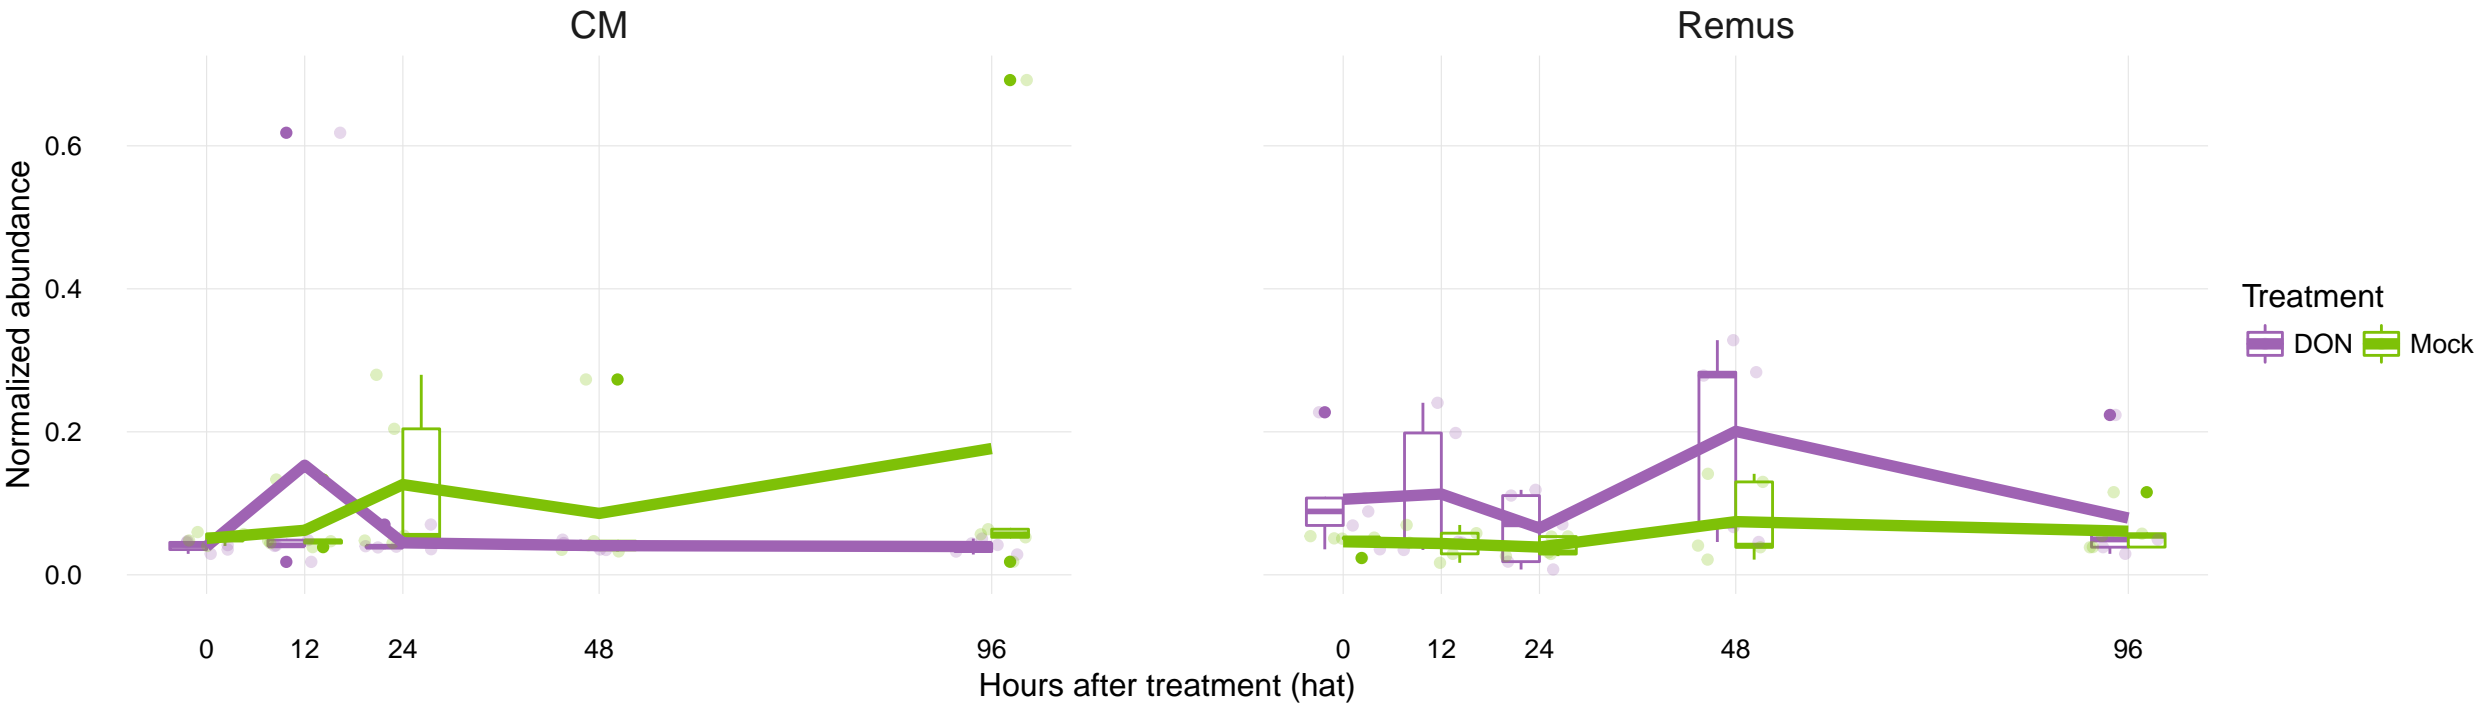

DON, Mock; all four genotypes

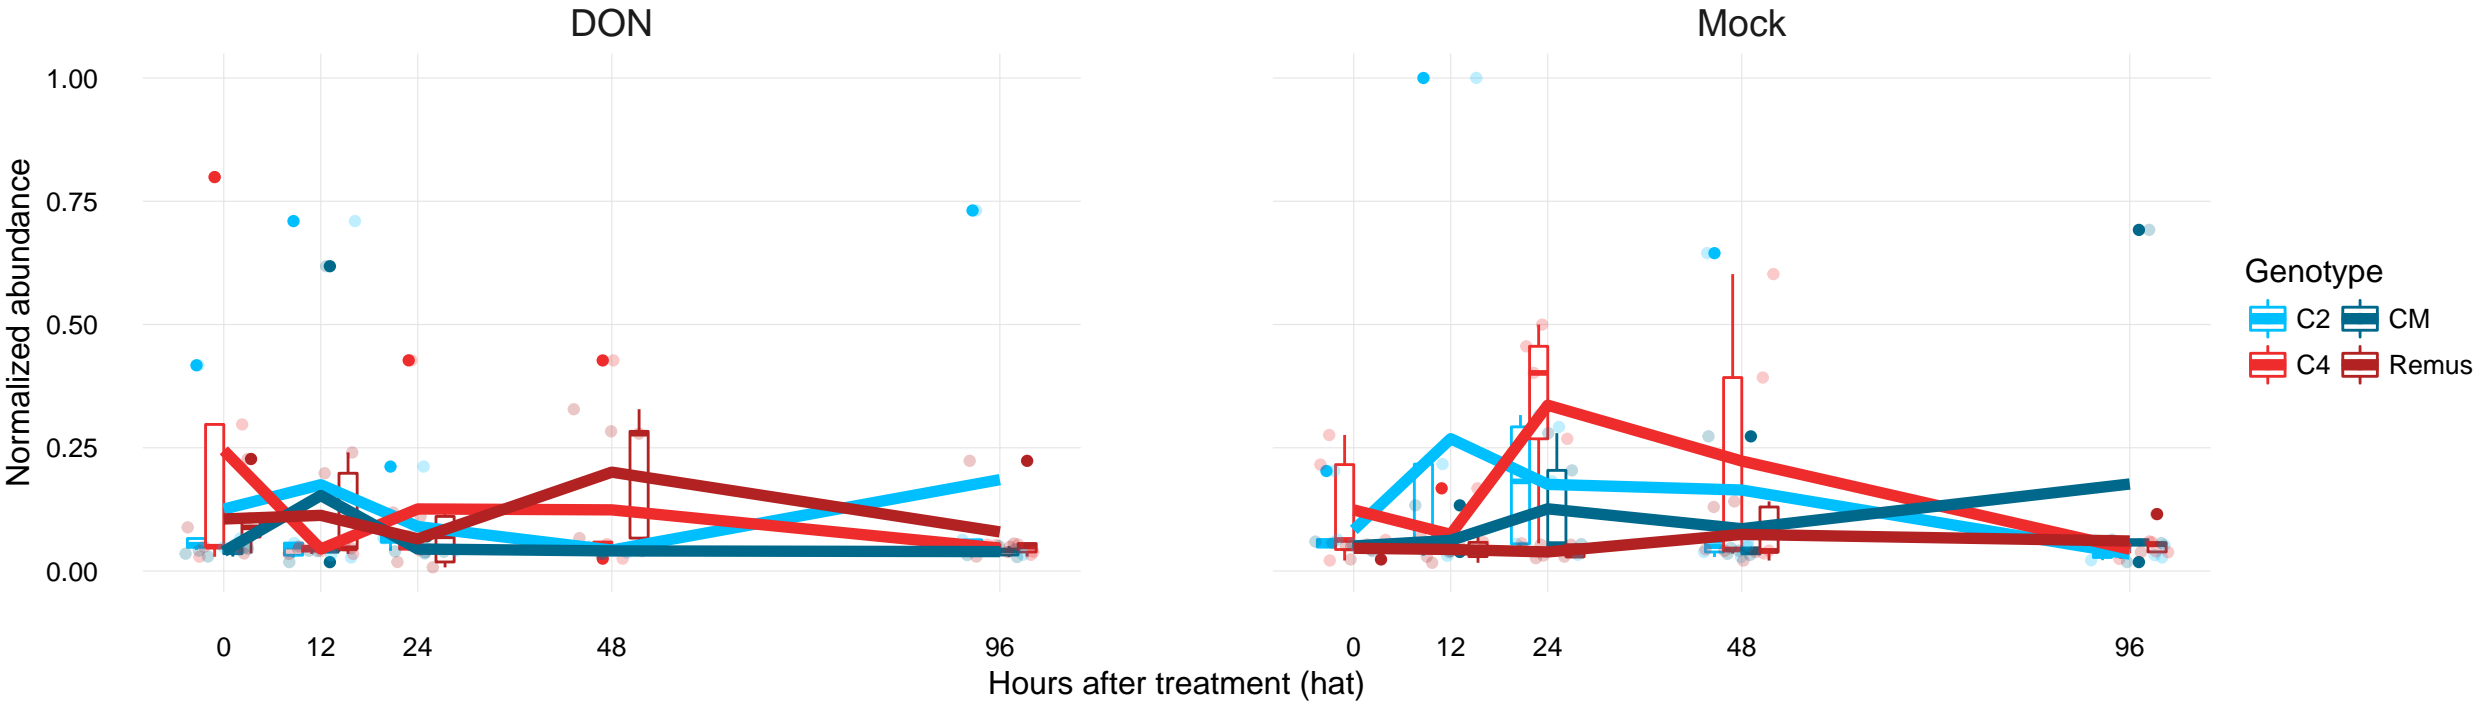

# A.51

Annotated as others (Iridoid)  
(1 database hit)

|                |                                                |
|----------------|------------------------------------------------|
| MZ             | 531.1474                                       |
| RT             | 12.04 min                                      |
| Normalization  | Indirectly via surrogate<br>in the KPX samples |
| Cluster        | –                                              |
| Cn total / Phe | 24 /                                           |

## C2, C4; different treatments

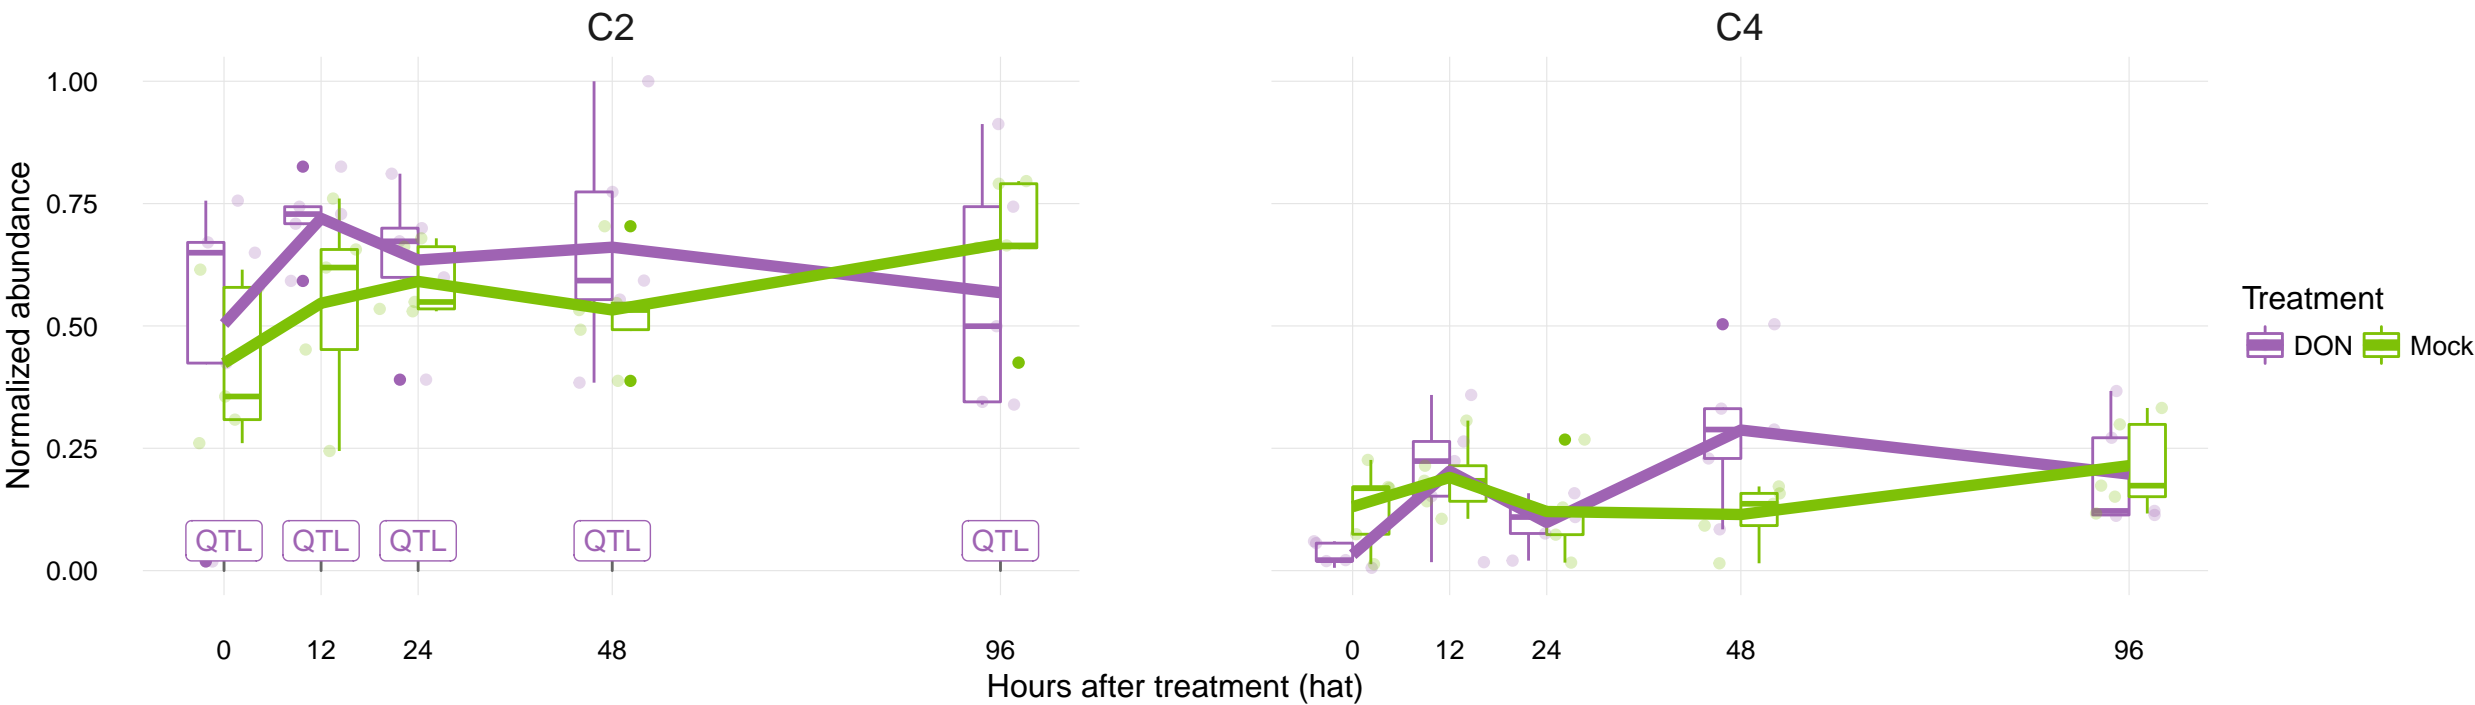

## DON, Mock; different genotypes

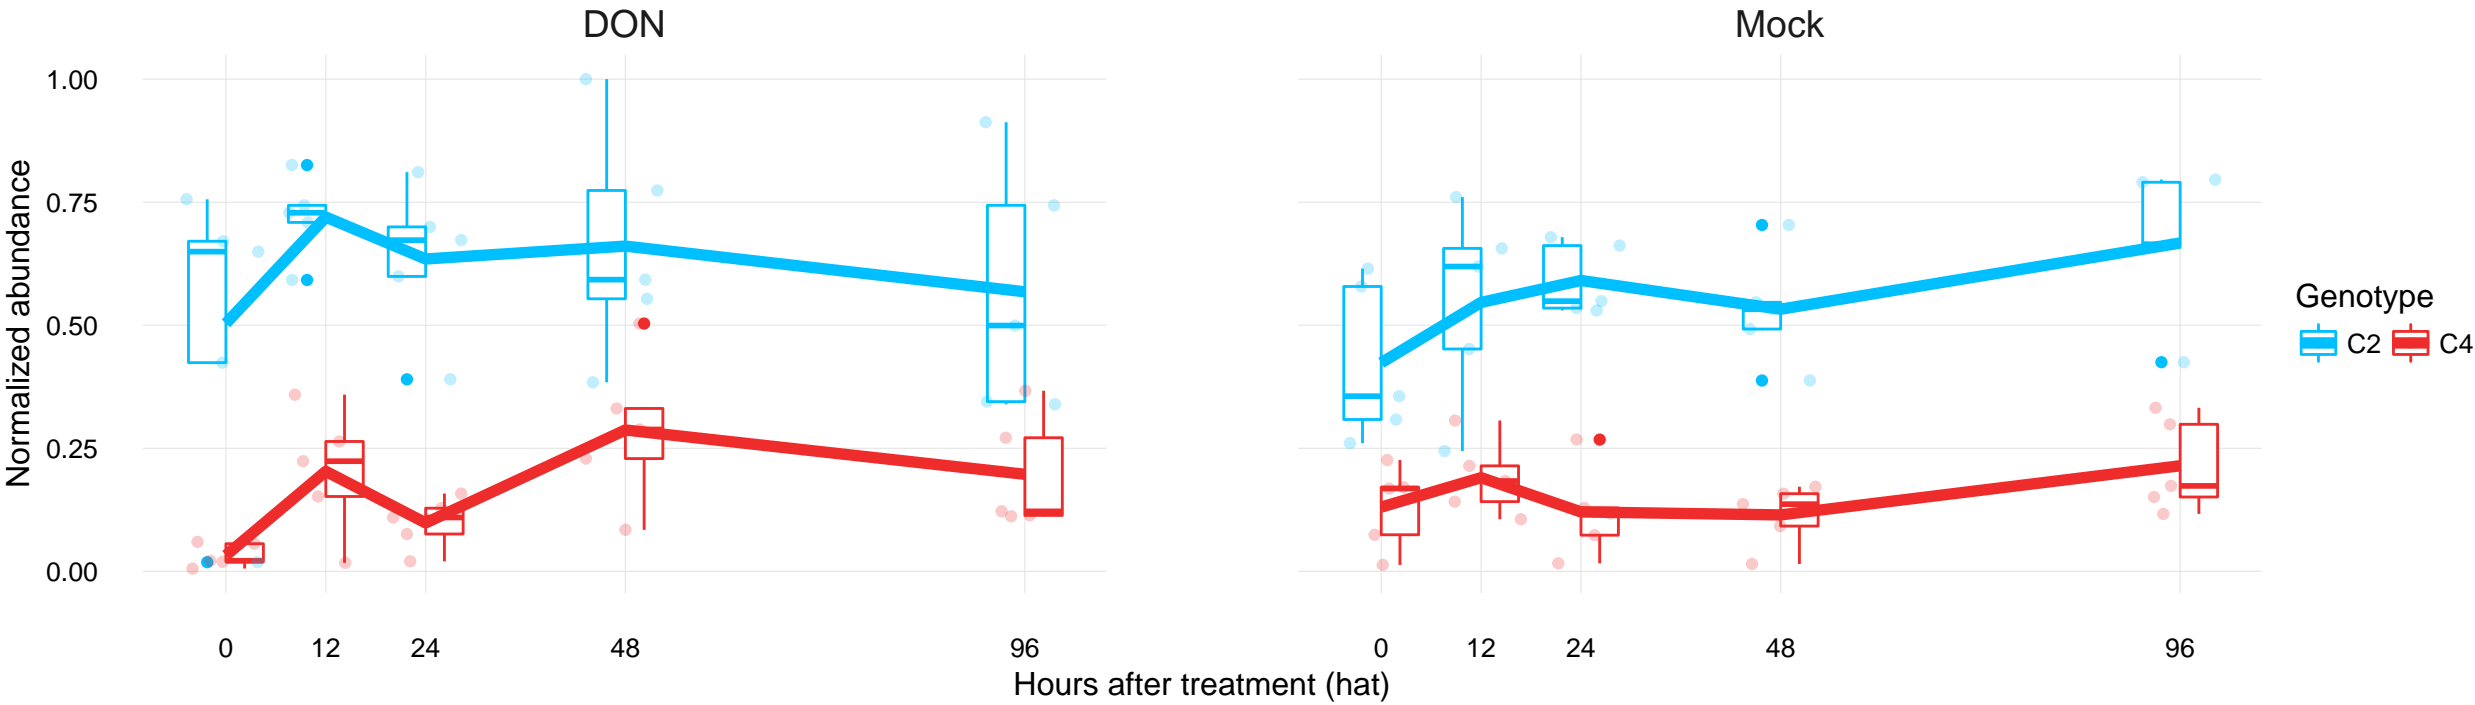

## CM, Remus; different treatments

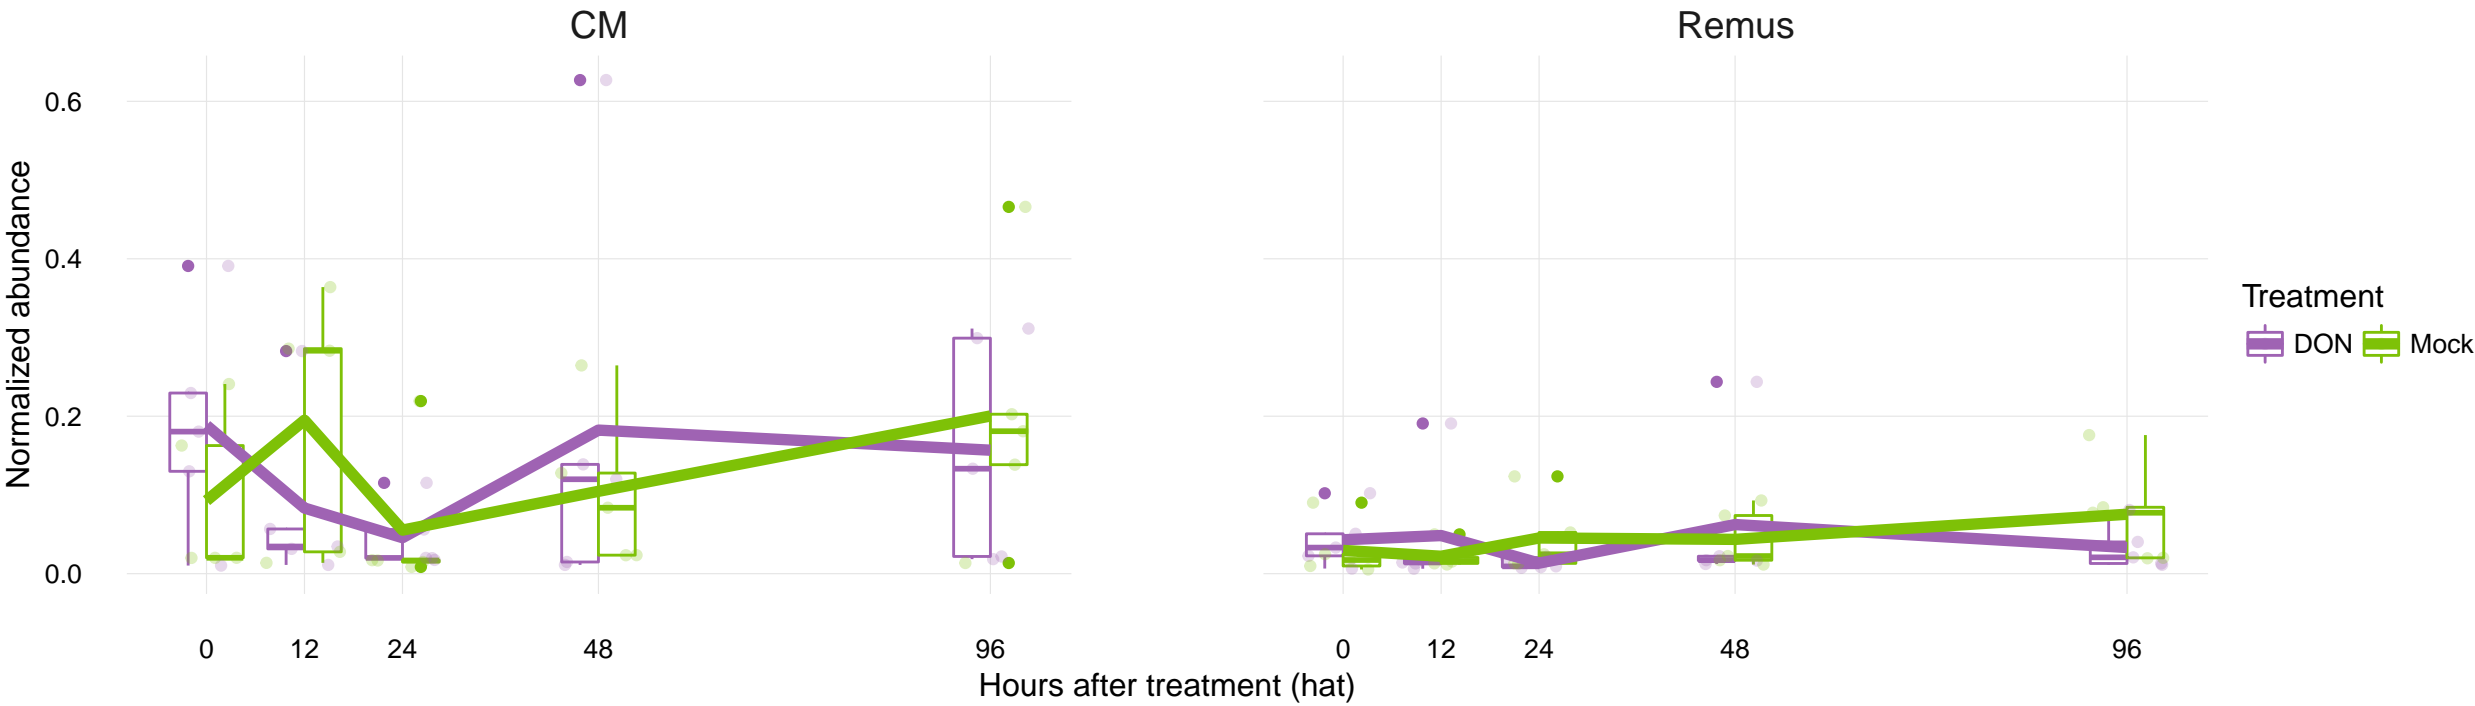

## DON, Mock; all four genotypes

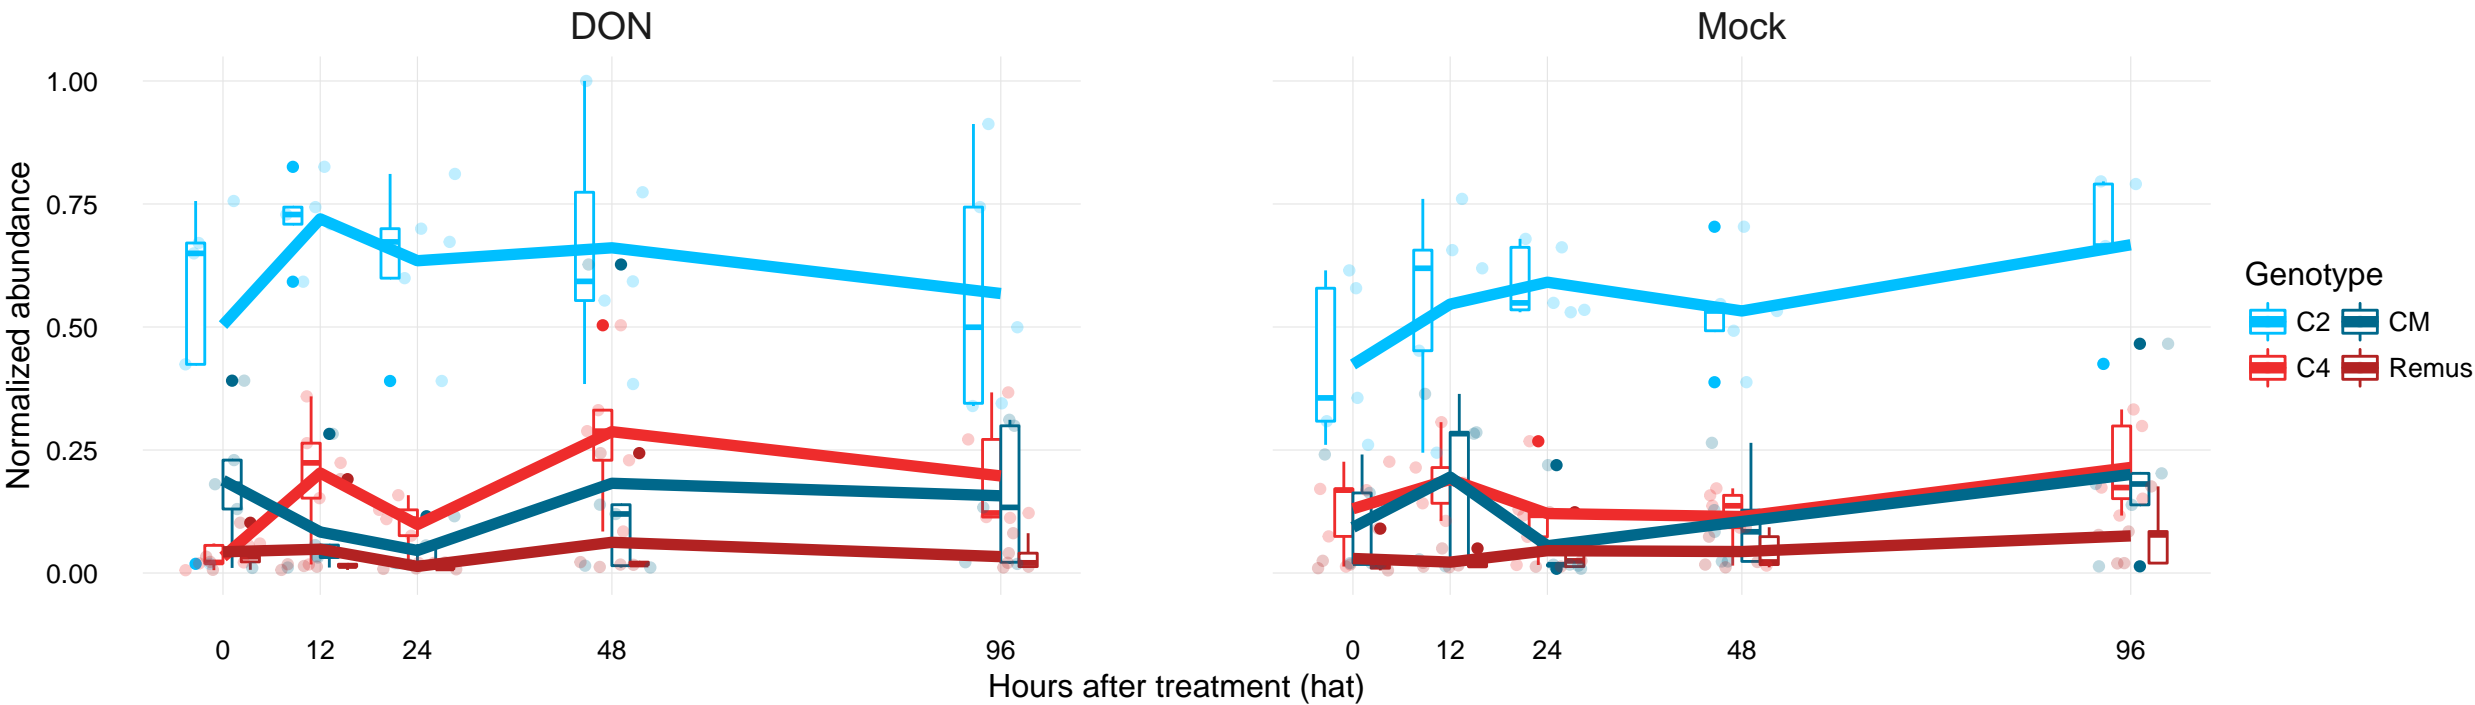

# A.139

Annotated as HCA derivative  
(1 database hit)

|                |                          |
|----------------|--------------------------|
| MZ             | 317.1725                 |
| RT             | 25.54 min                |
| Normalization  | Directly via KPX samples |
| Cluster        | –                        |
| Cn total / Phe | 17 /                     |

## C2, C4; different treatments

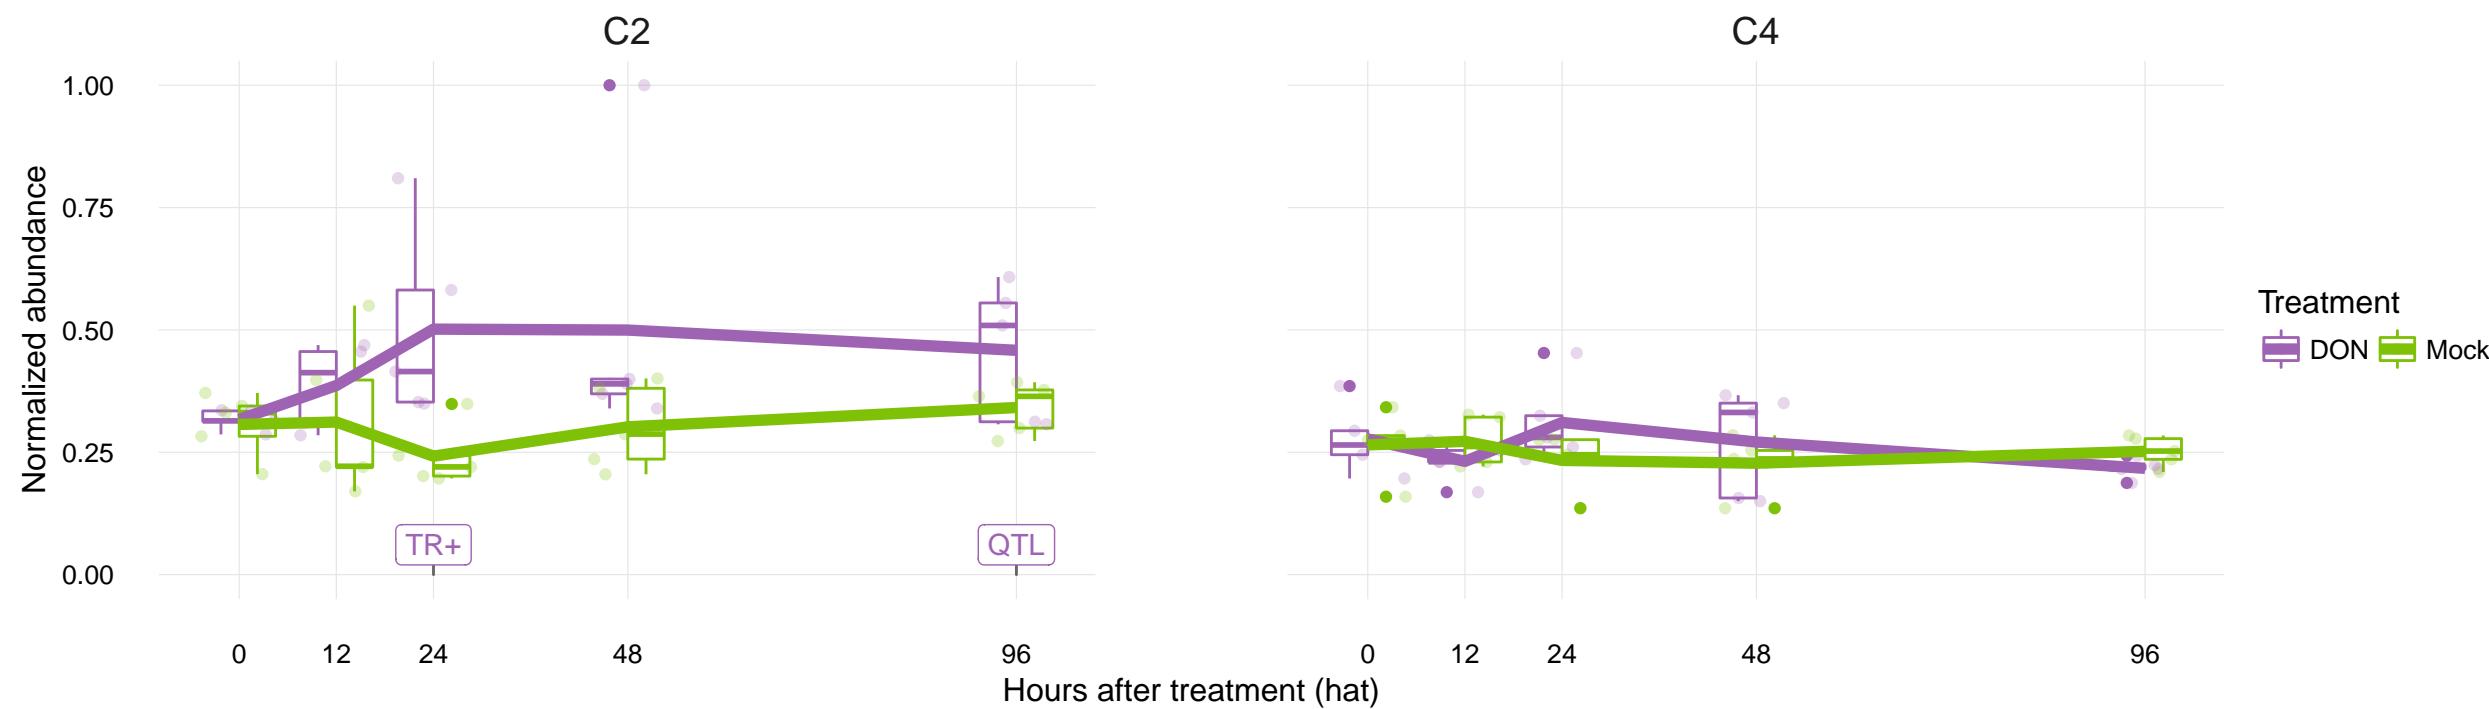

## DON, Mock; different genotypes

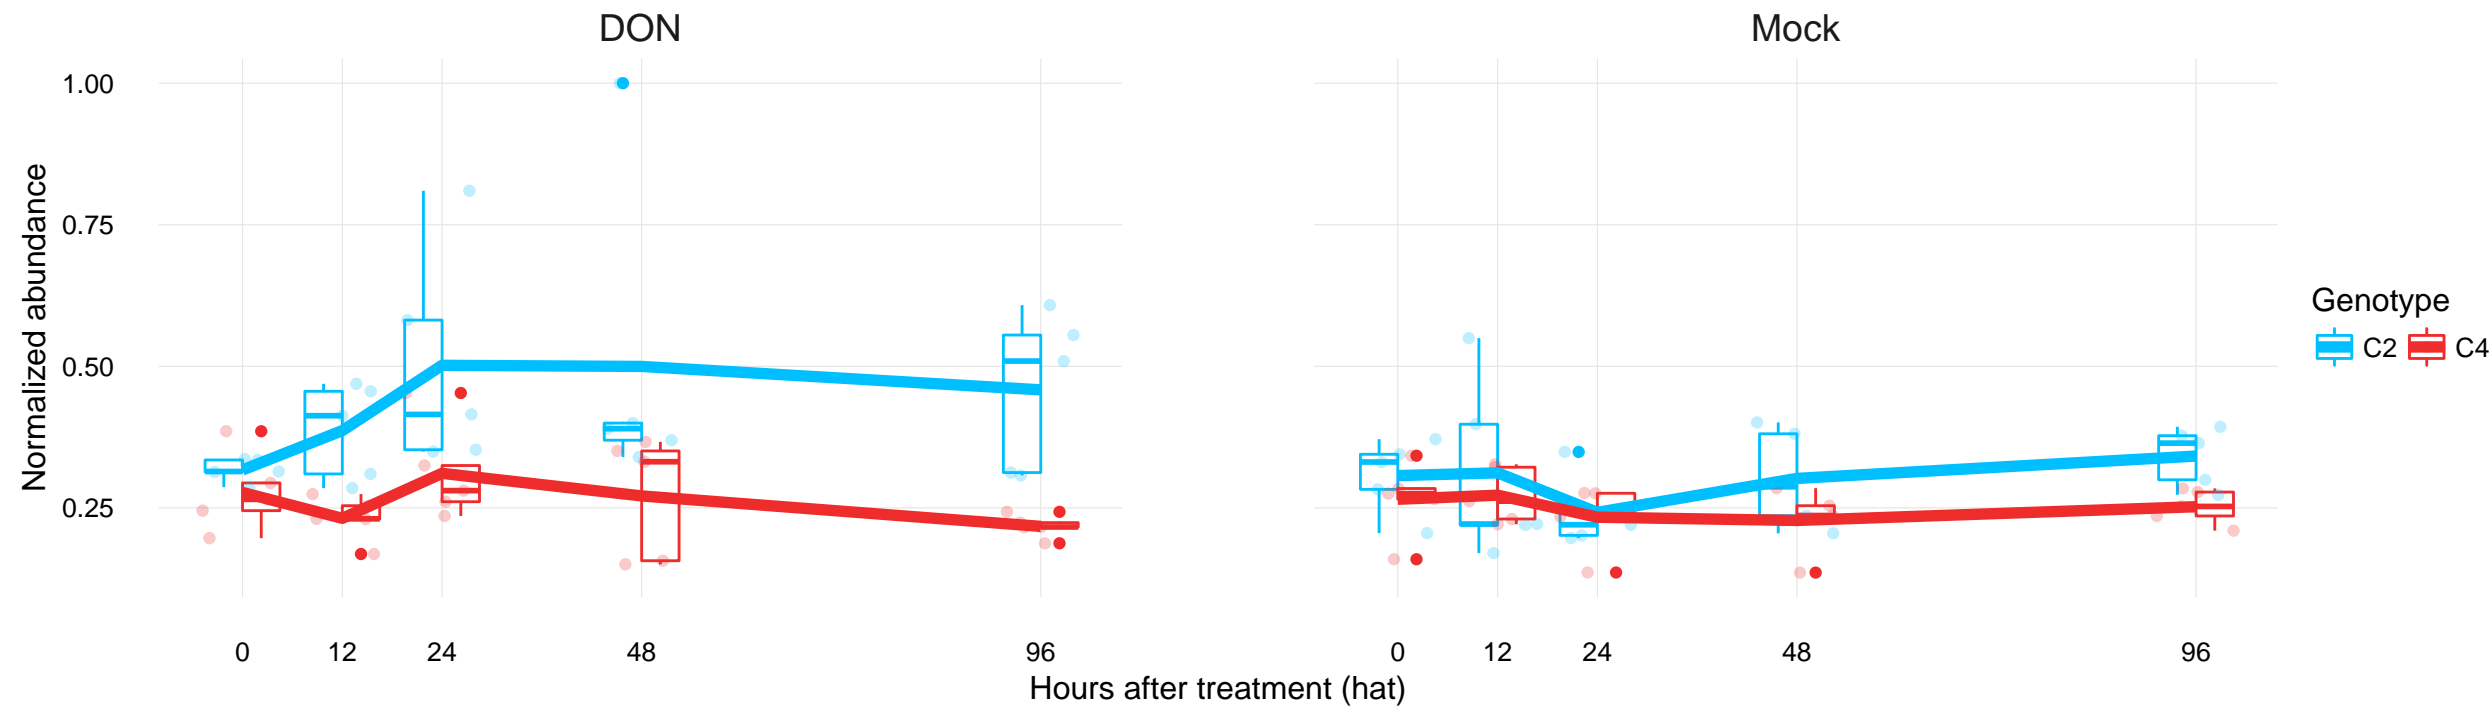

## CM, Remus; different treatments

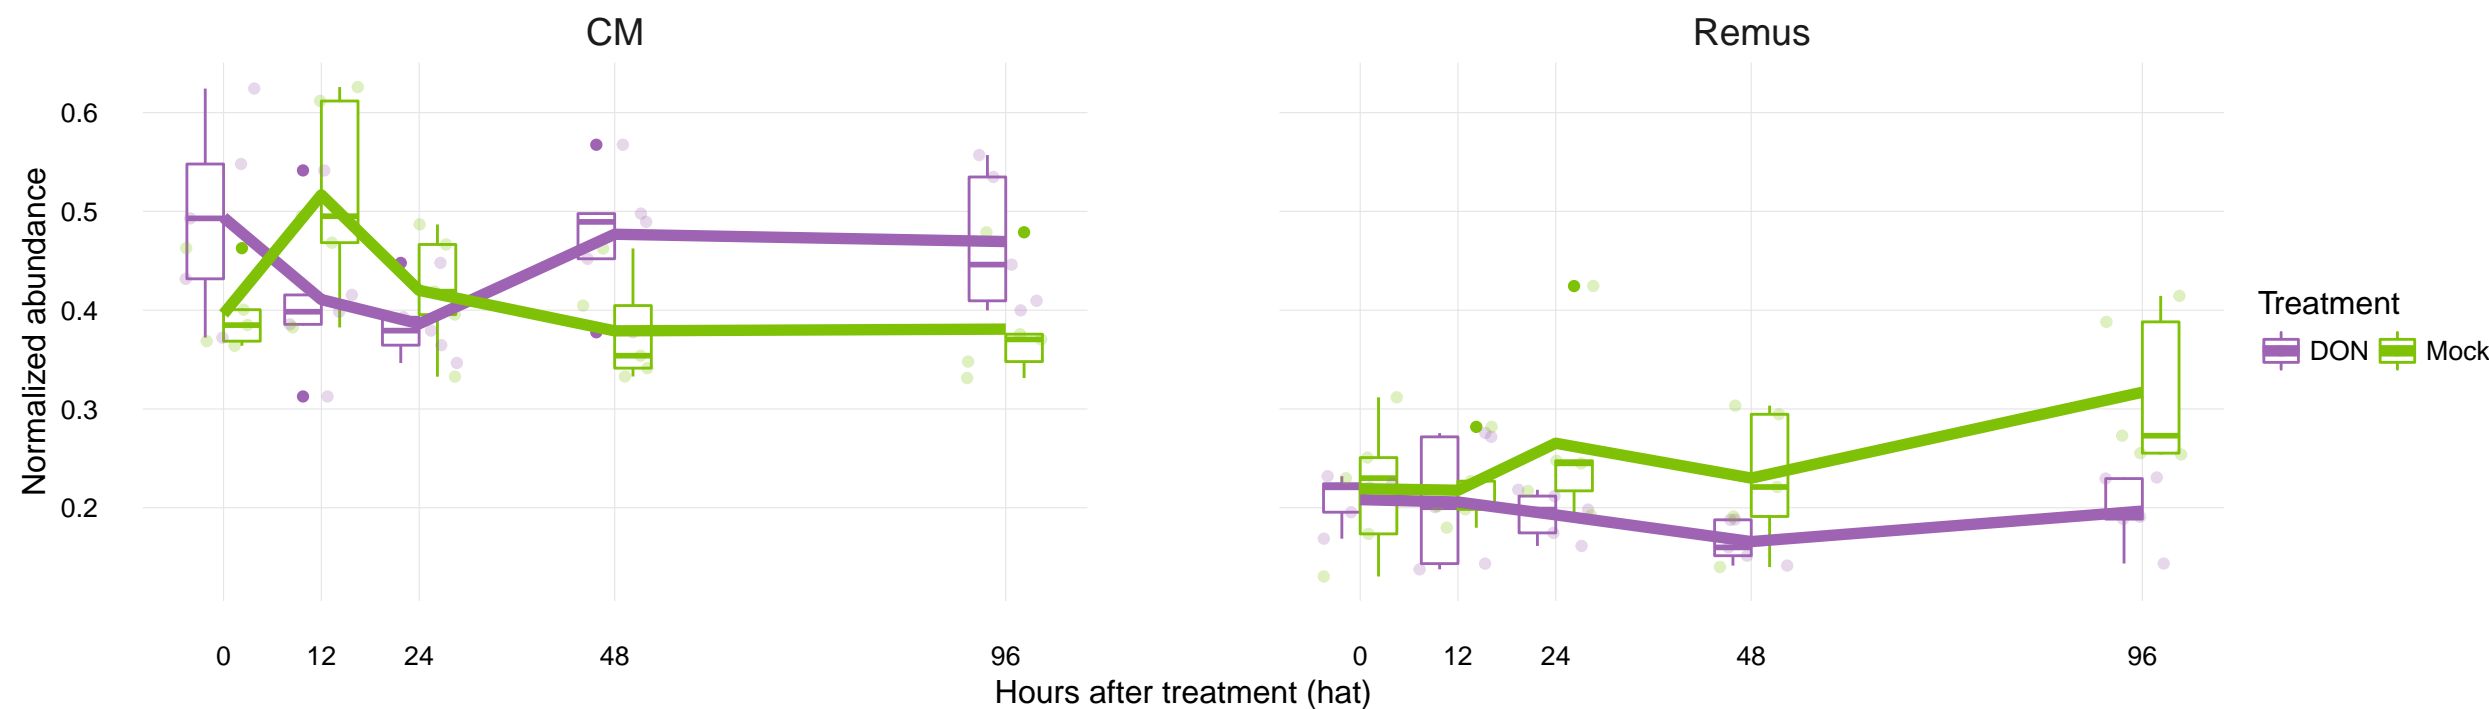

## DON, Mock; all four genotypes

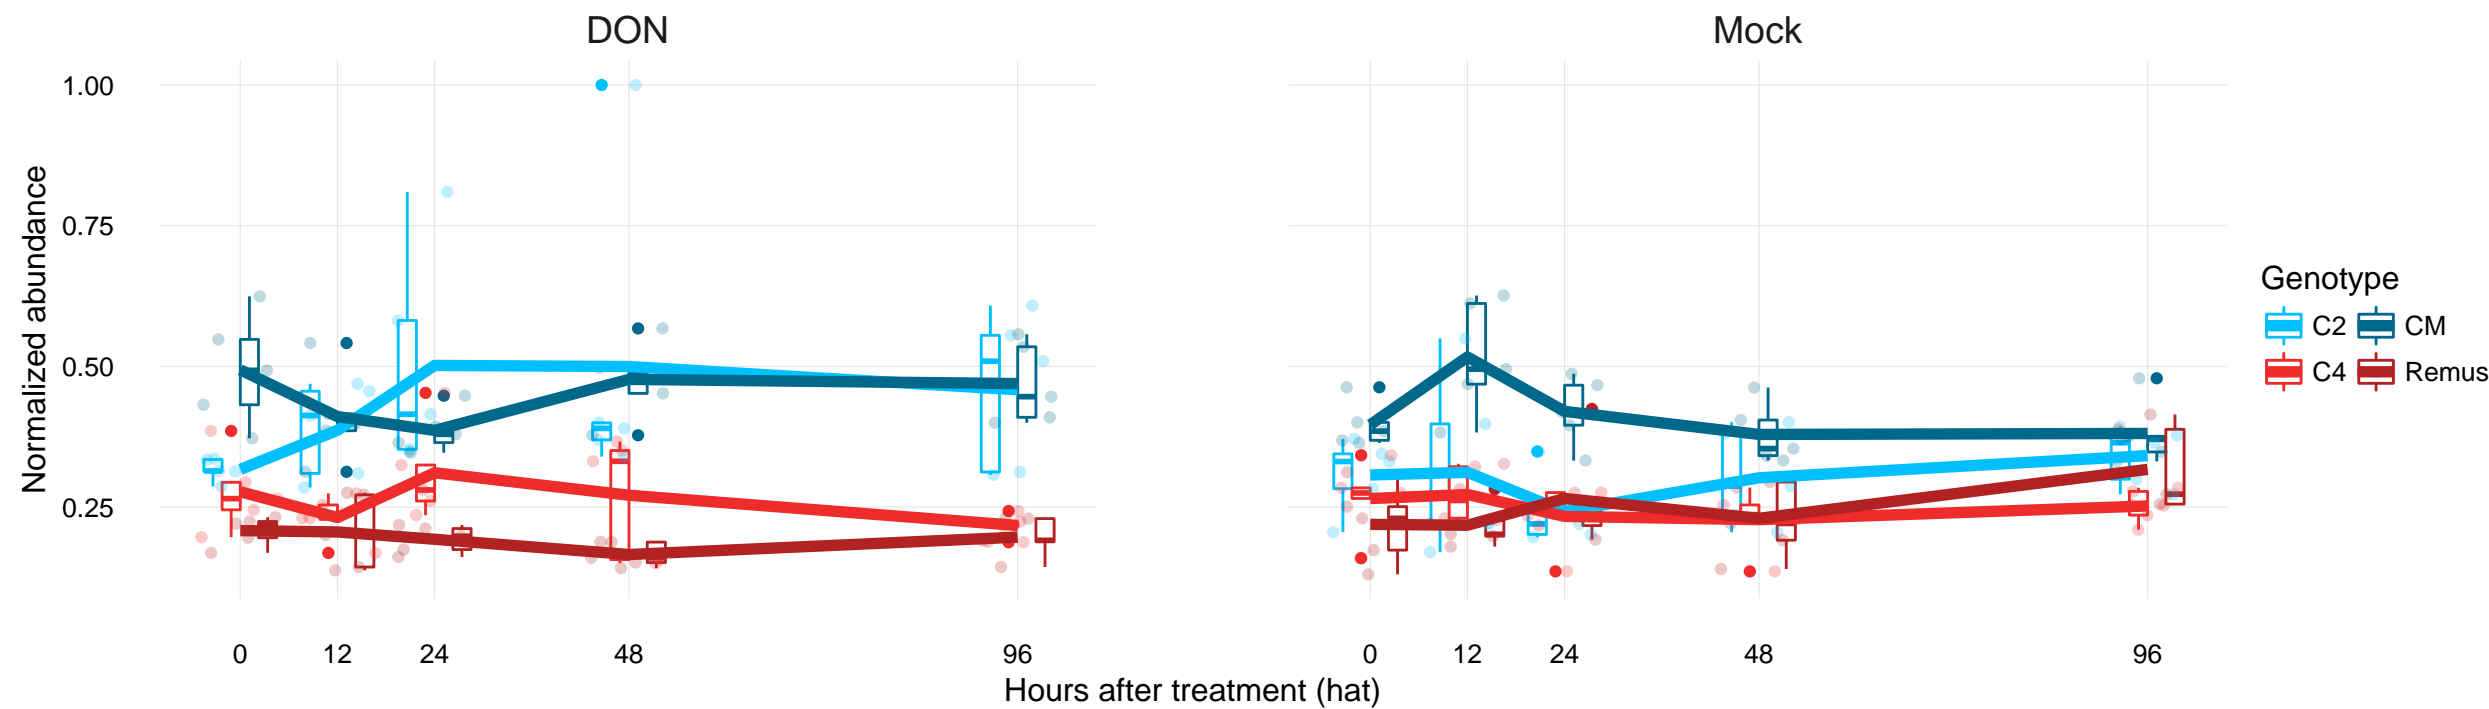

# A.10

Annotated as others  
(4 database hits)

|                |                |
|----------------|----------------|
| MZ             | 169.0495       |
| RT             | 5.58 min       |
| Normalization  | Not normalized |
| Cluster        | –              |
| Cn total / Phe | 8 /            |

## C2, C4; different treatments

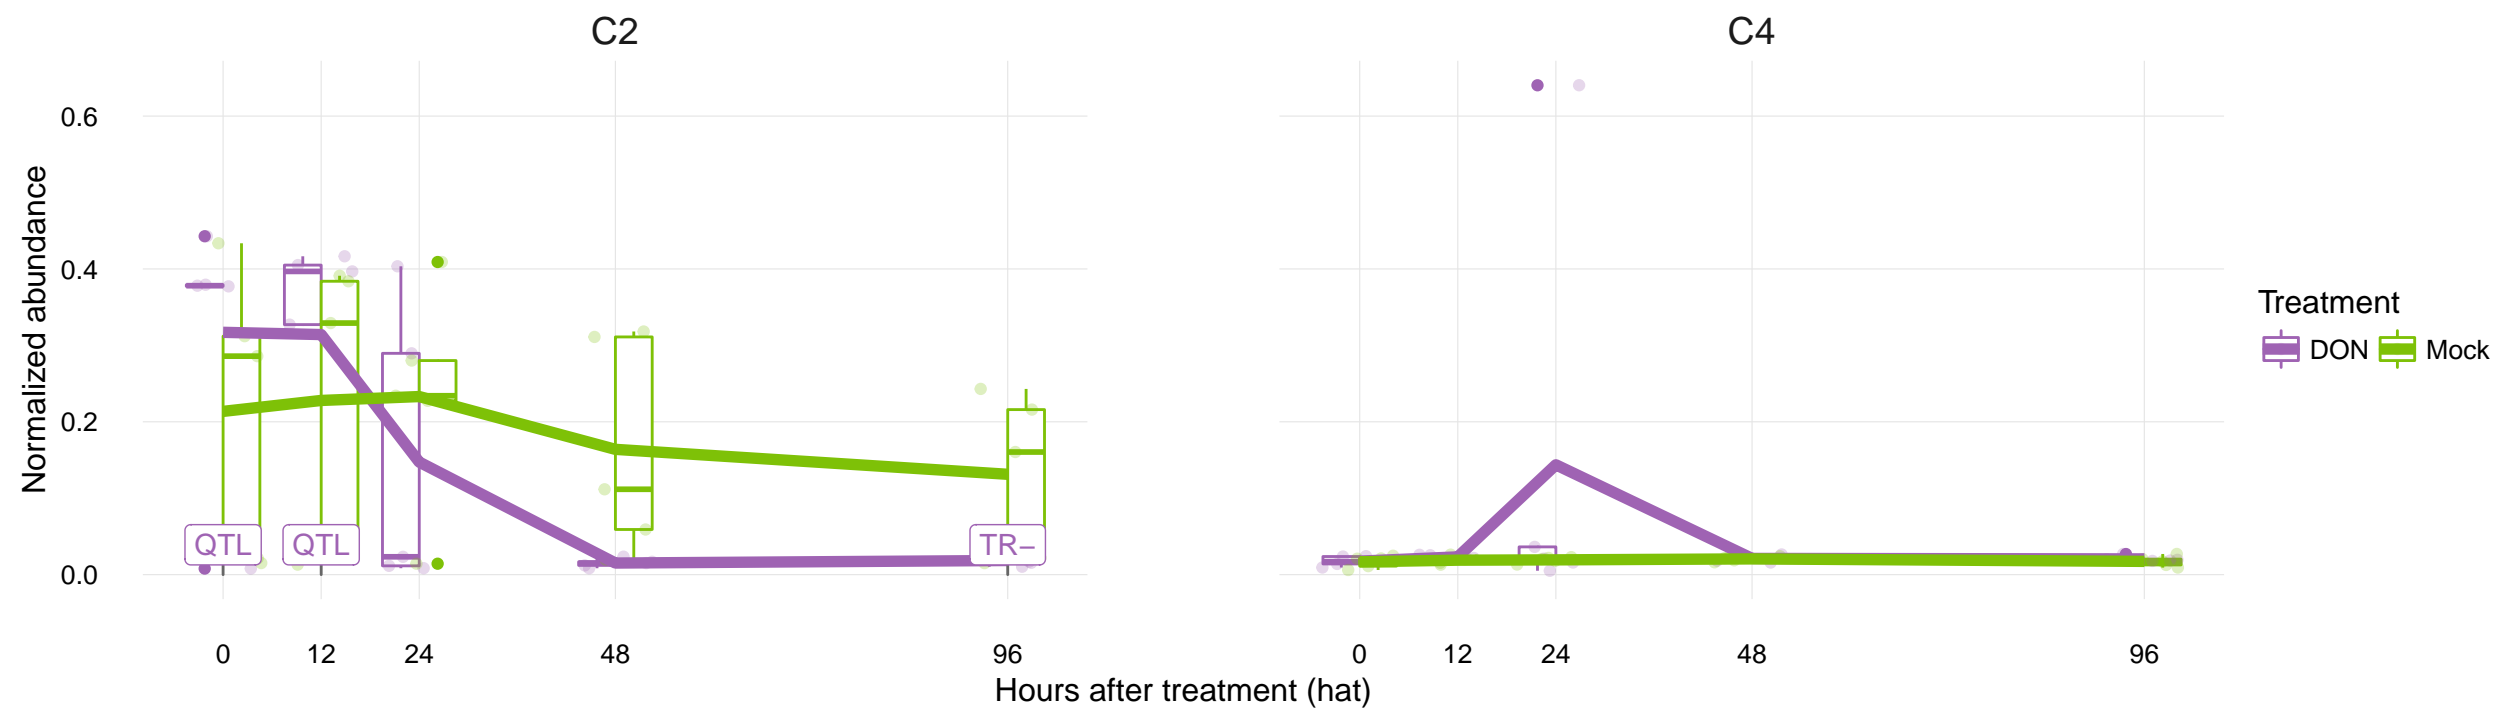

## DON, Mock; different genotypes

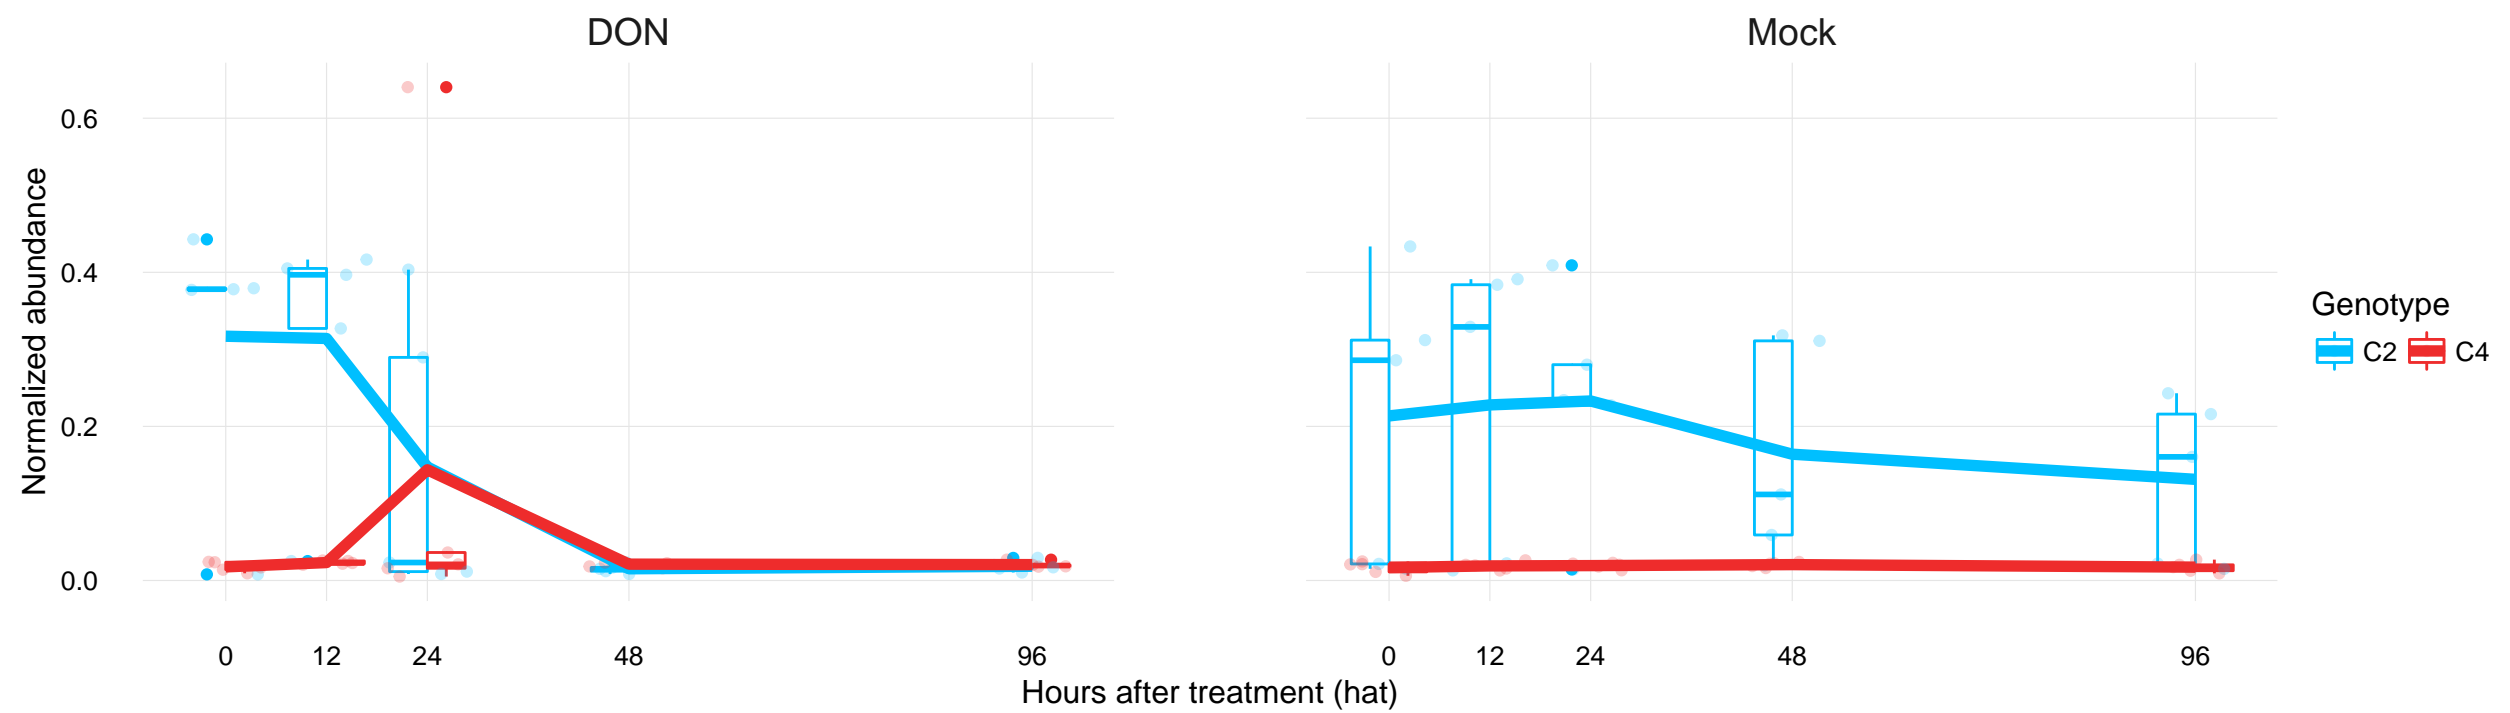

## CM, Remus; different treatments

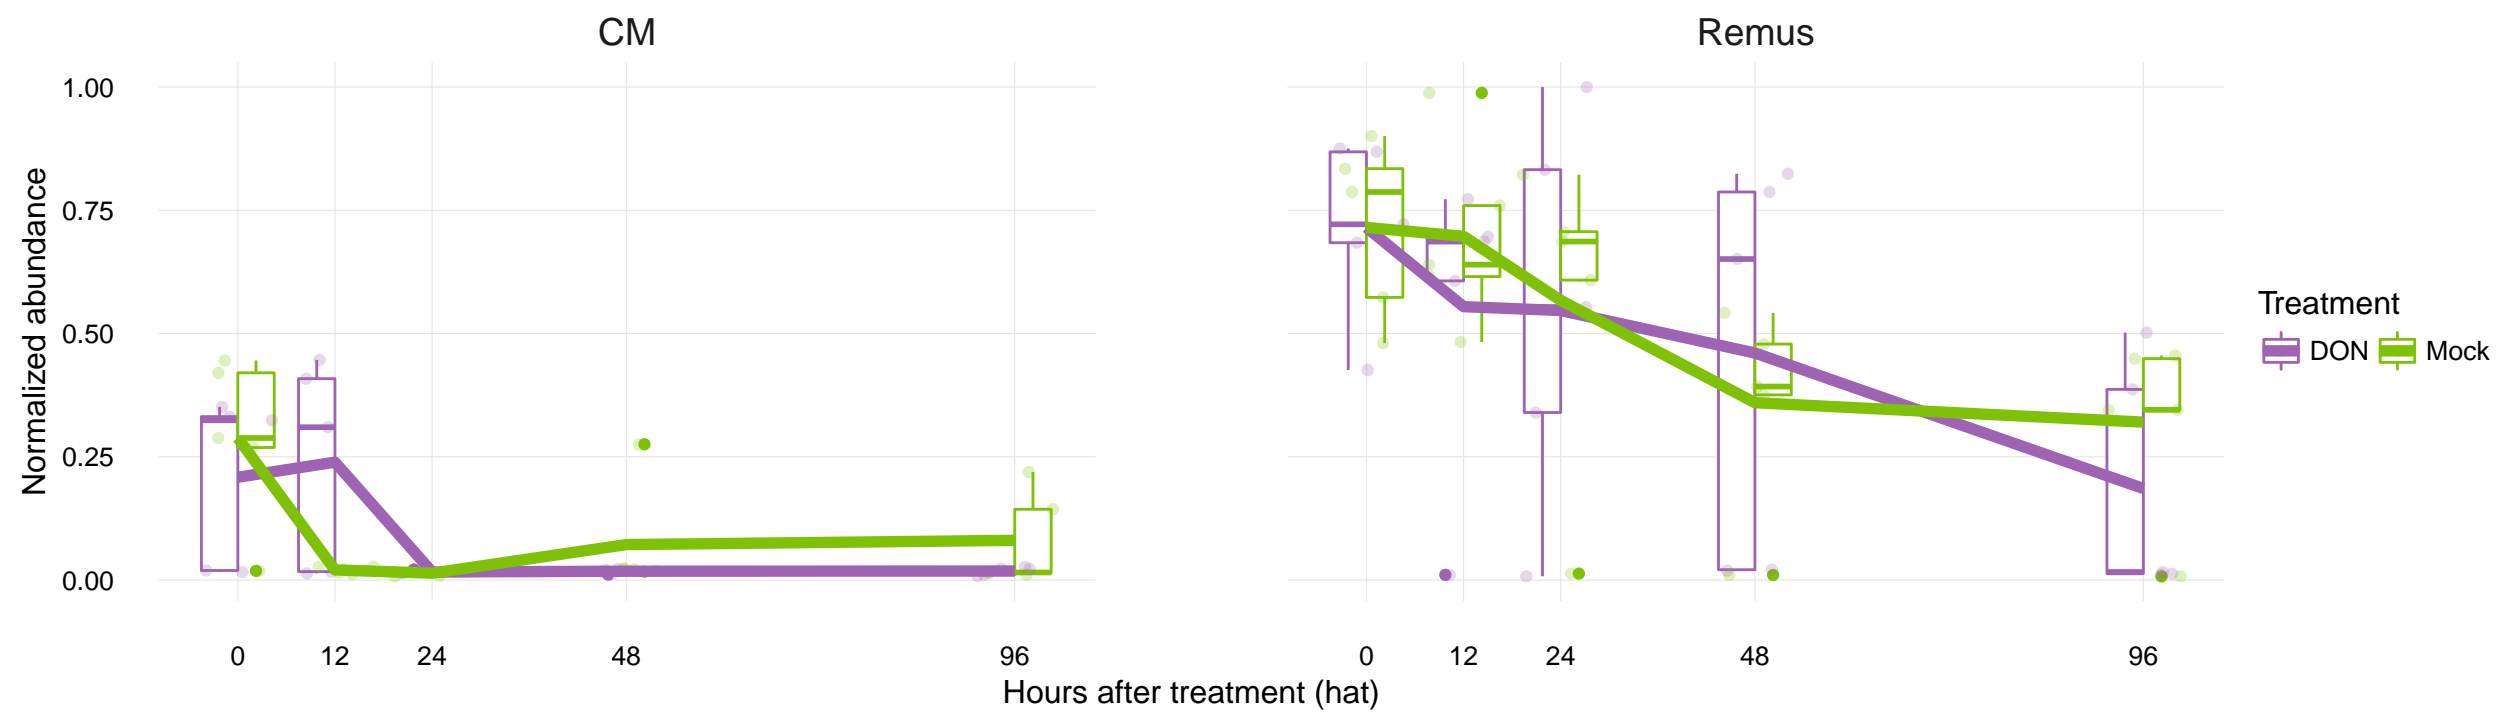

## DON, Mock; all four genotypes

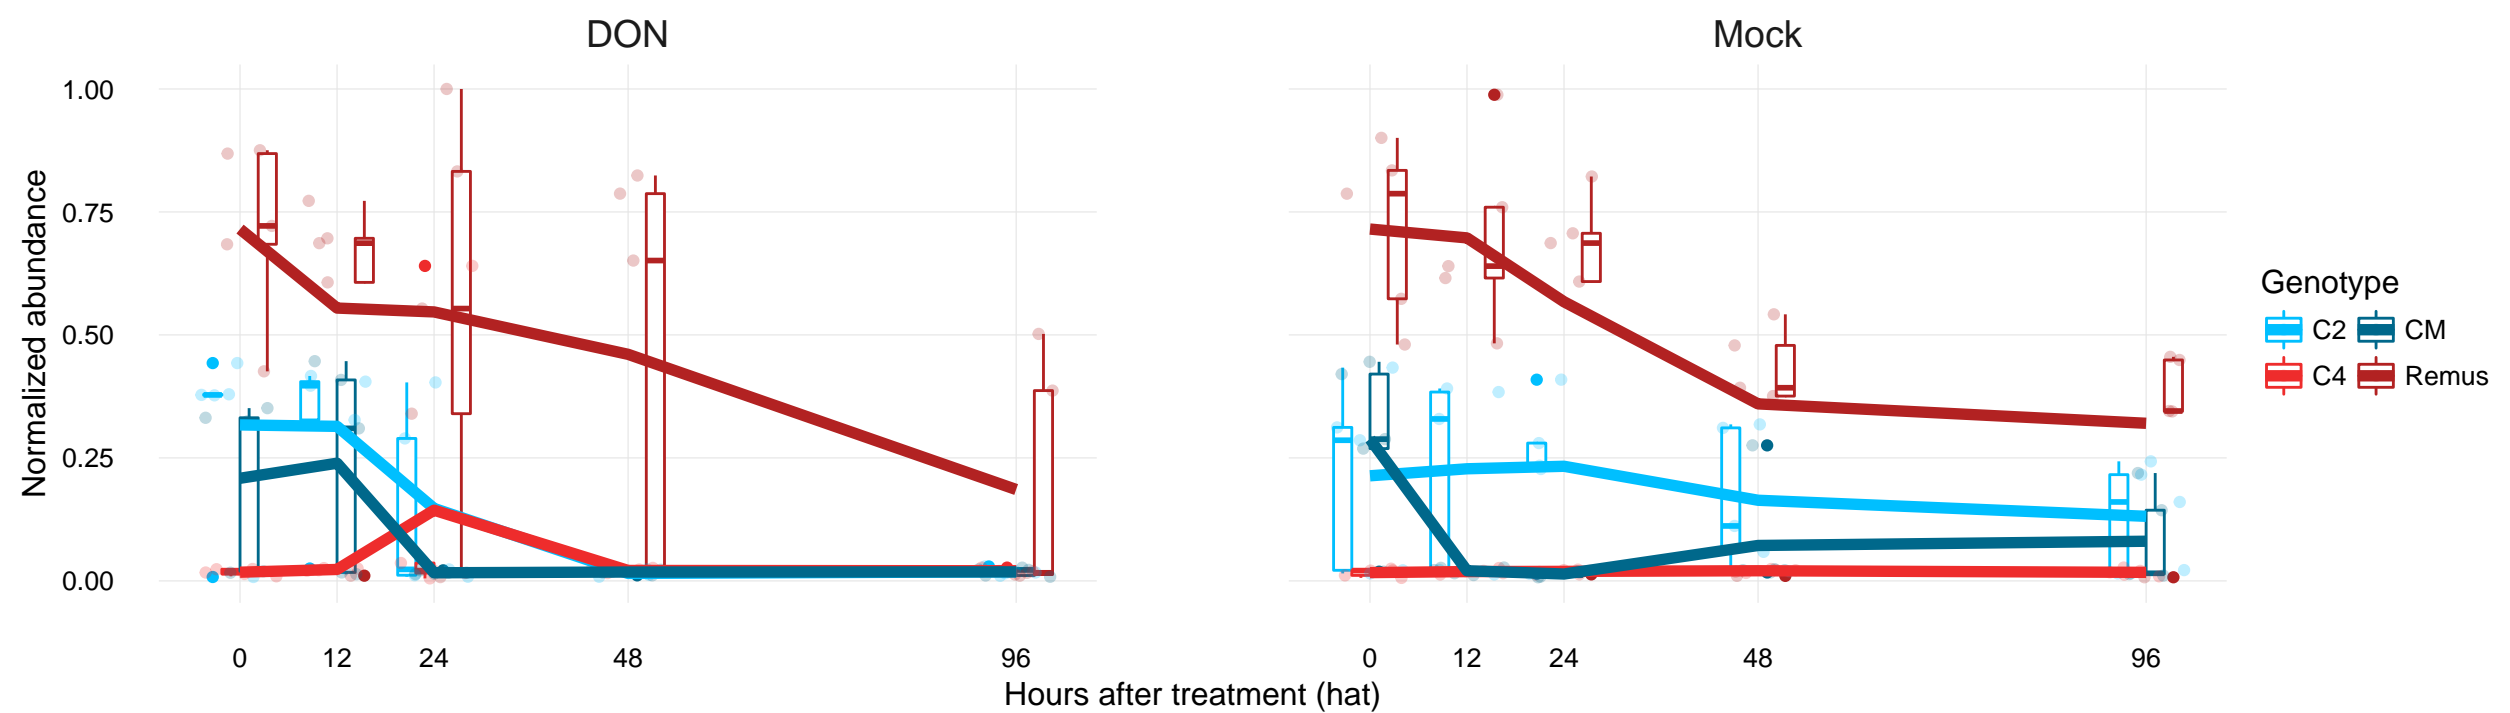

# A.20

Annotated as HCA derivative  
(1 database hit)

|                |                                                |
|----------------|------------------------------------------------|
| MZ             | 365.0845                                       |
| RT             | 7.52 min                                       |
| Normalization  | Indirectly via surrogate<br>in the KPX samples |
| Cluster        | —                                              |
| Cn total / Phe | 15 /                                           |

## C2, C4; different treatments

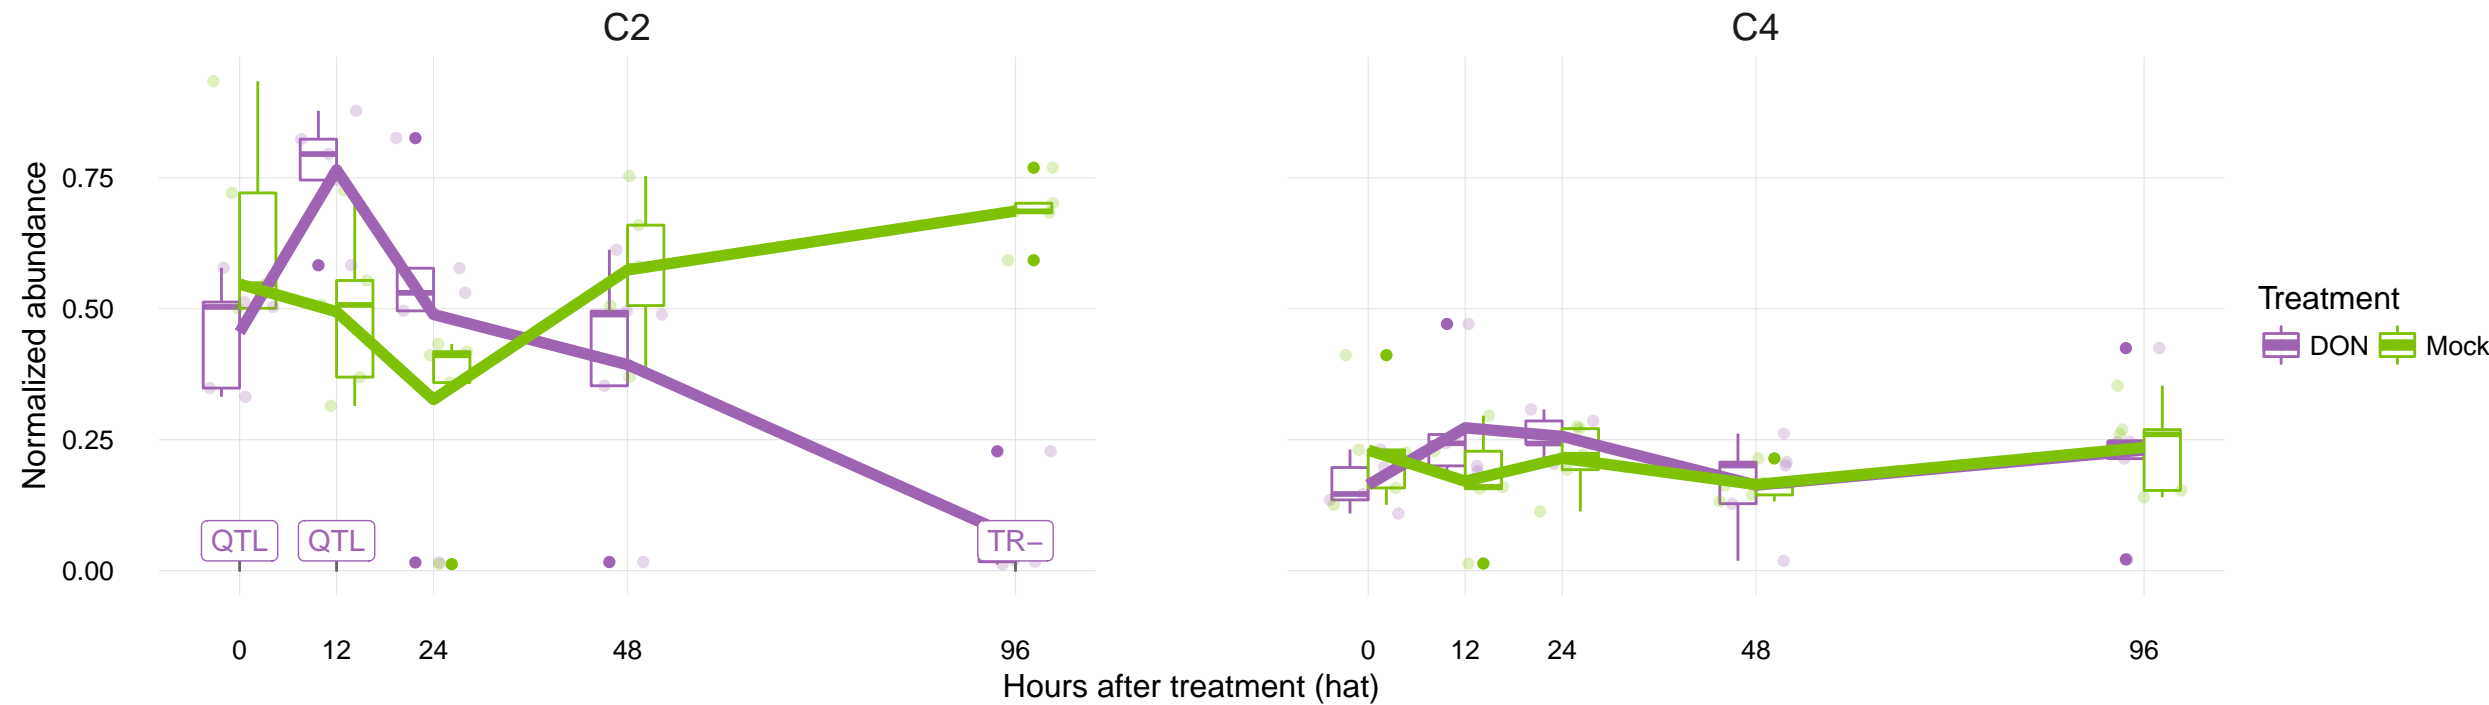

## DON, Mock; different genotypes

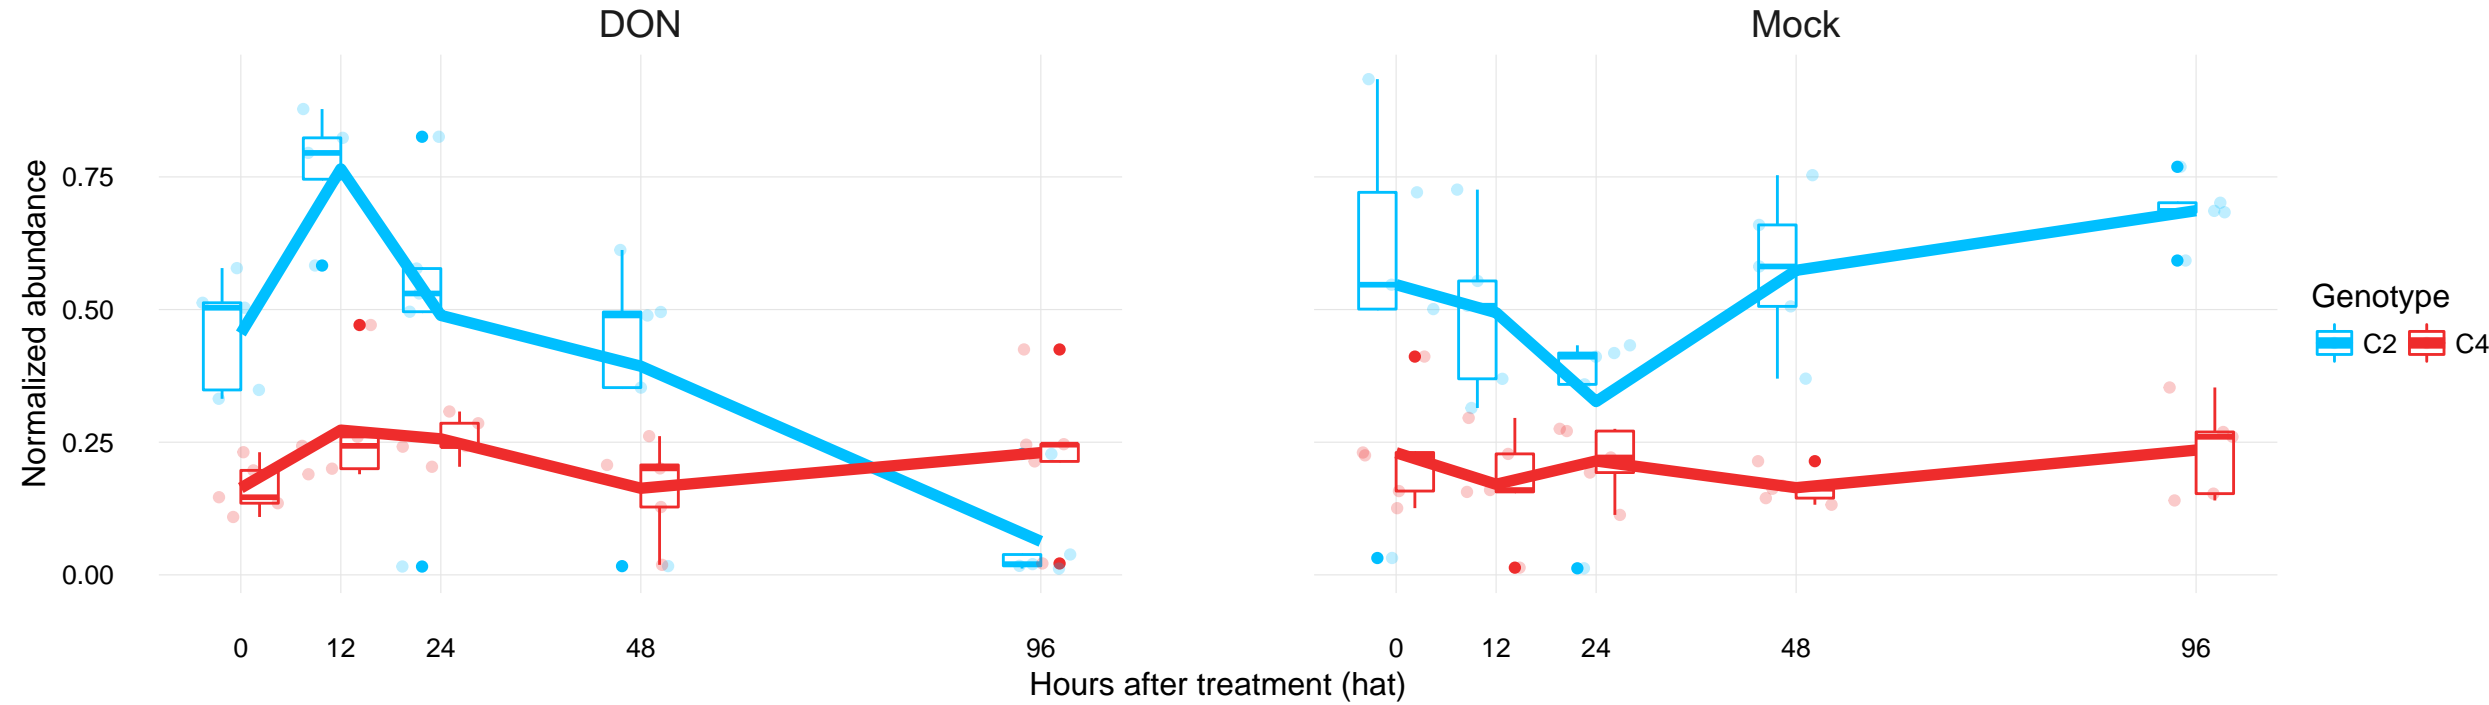

## CM, Remus; different treatments

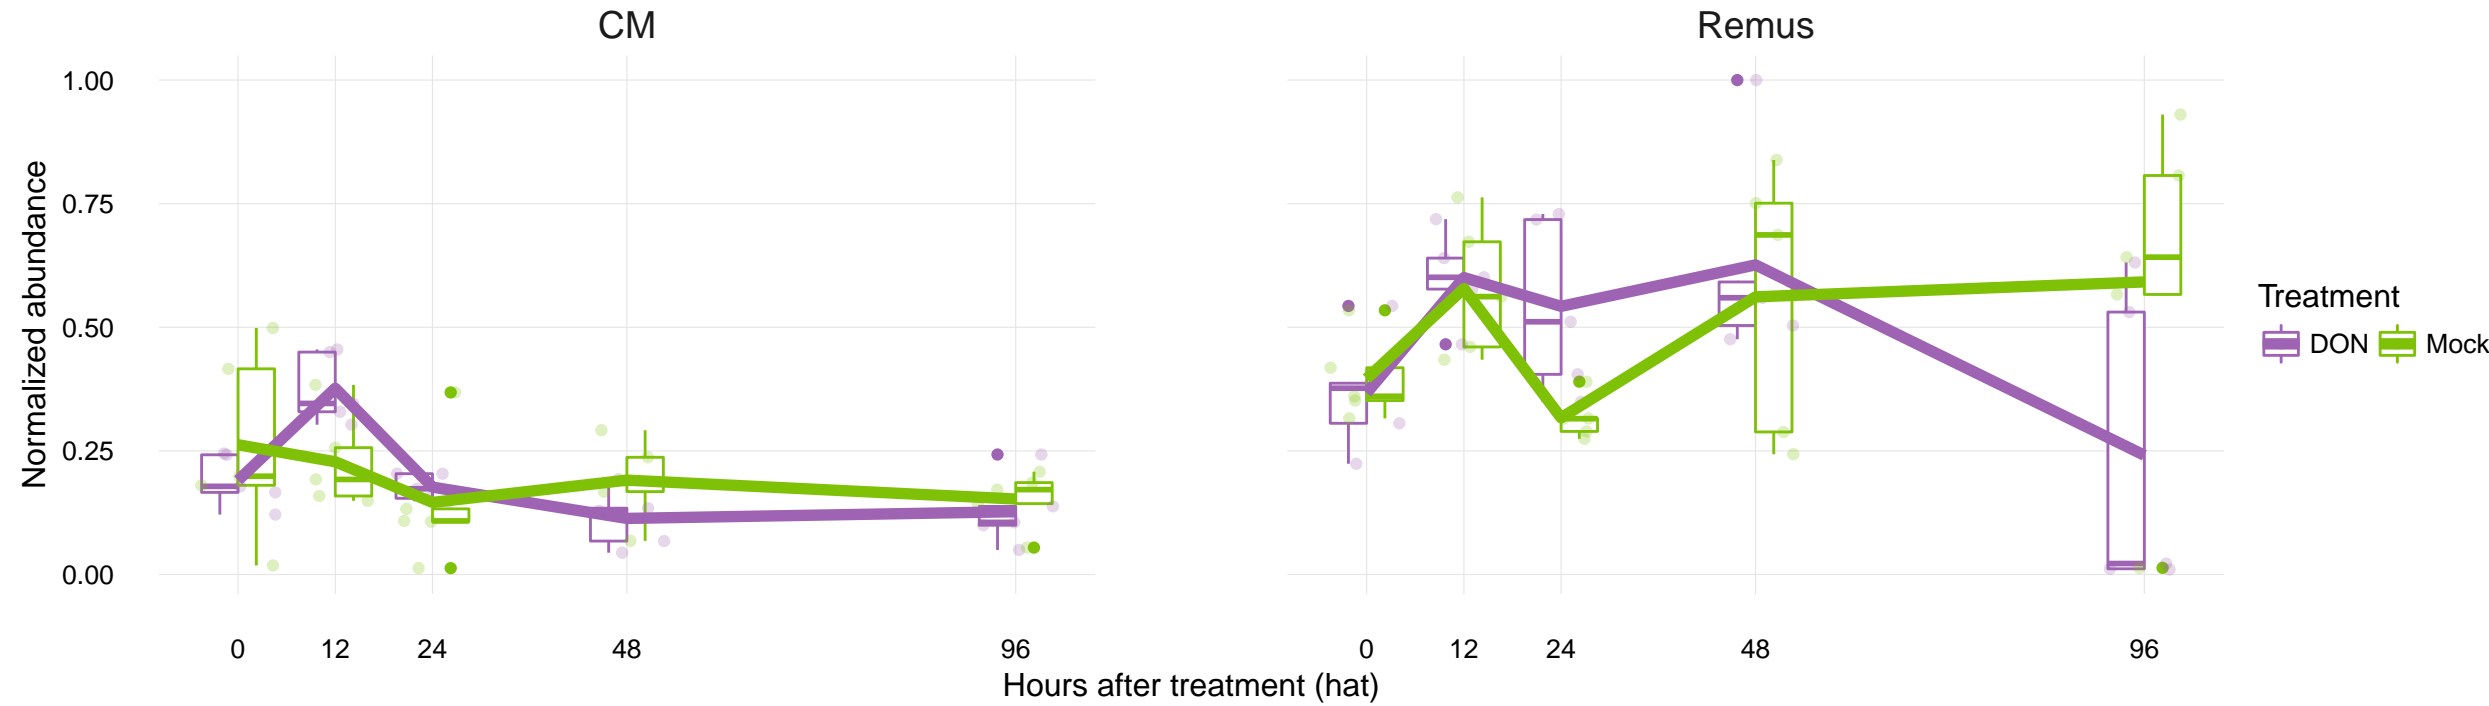

## DON, Mock; all four genotypes

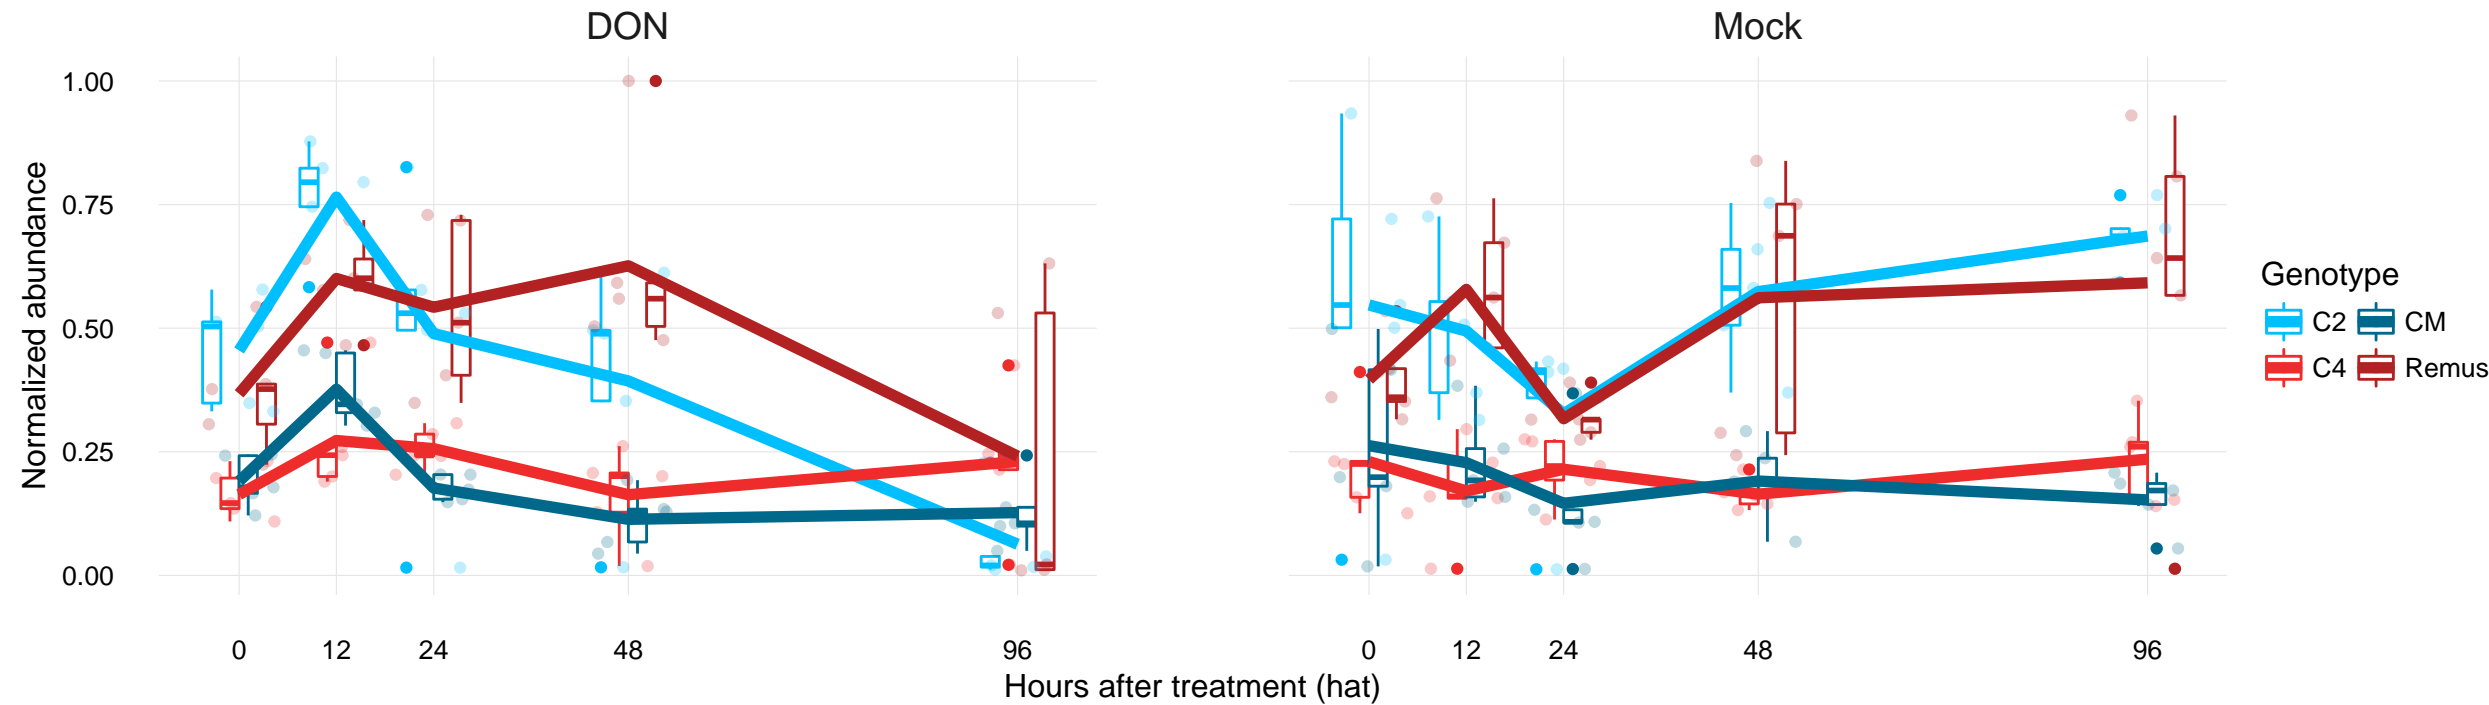



# A.50

Annotated as Flavonoid or others (GlcF, Chalkon)  
(3 database hits)

|                |                          |
|----------------|--------------------------|
| MZ             | 573.1578                 |
| RT             | 11.99 min                |
| Normalization  | Directly via KPX samples |
| Cluster        | –                        |
| Cn total / Phe | 26 /                     |

## C2, C4; different treatments

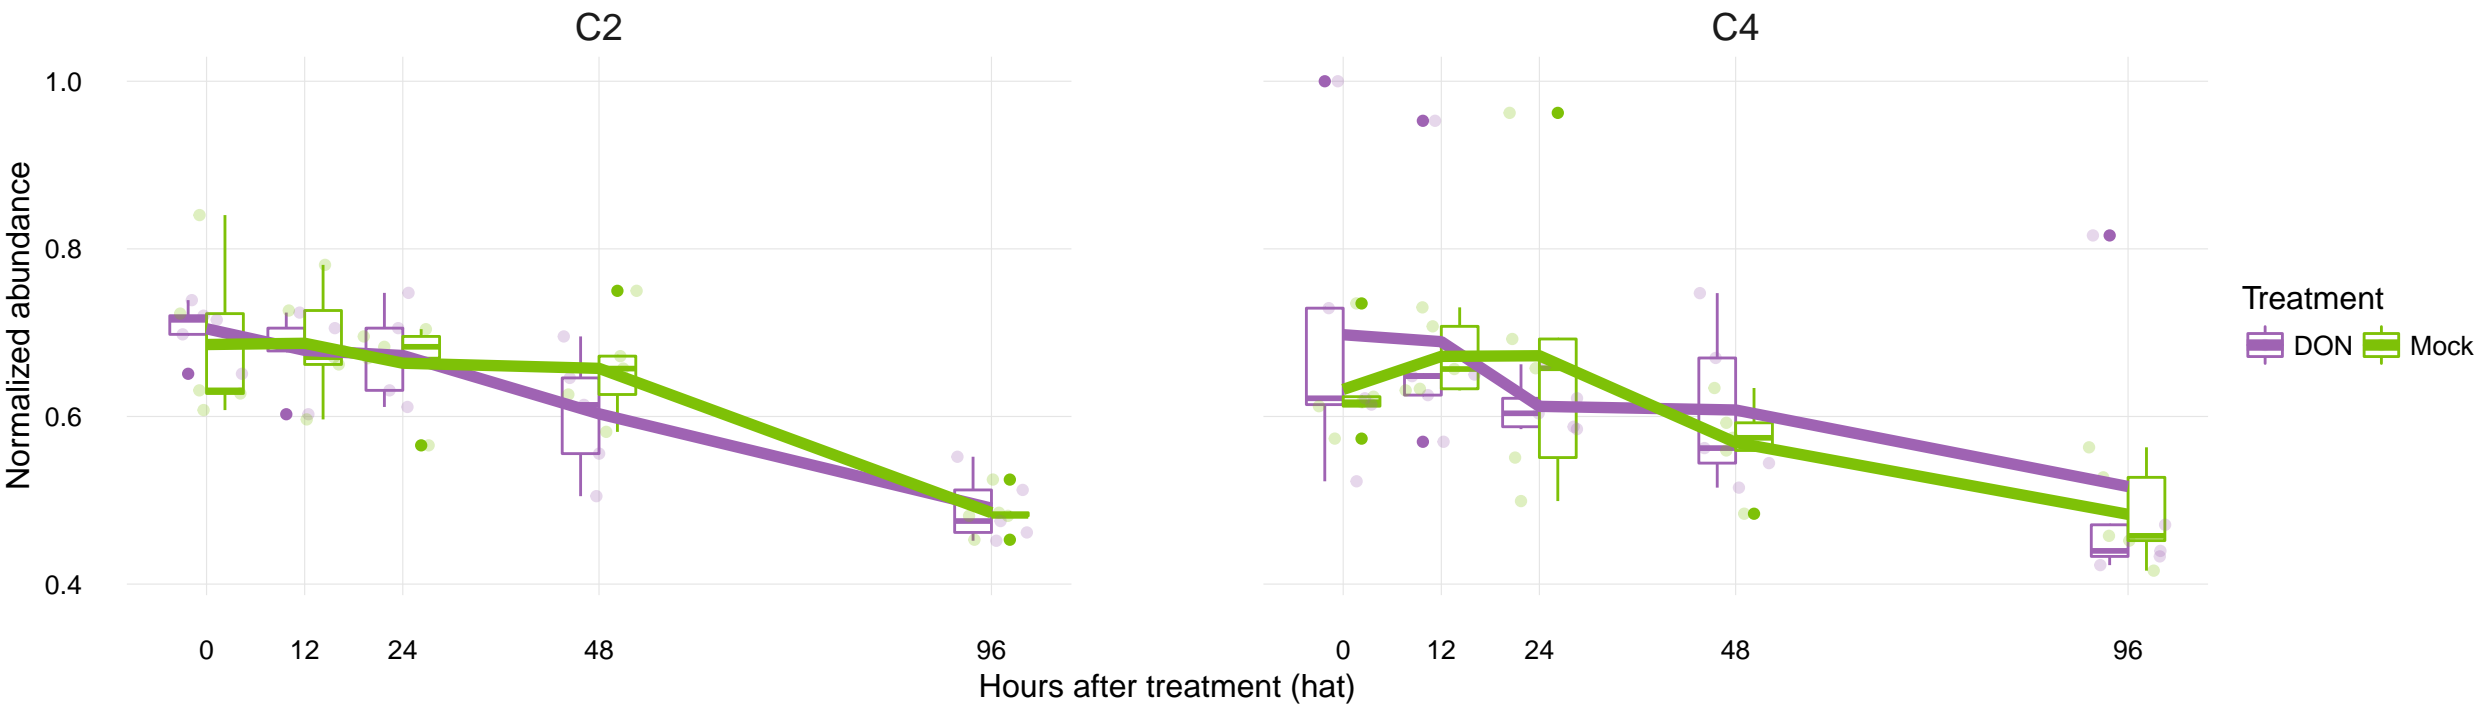

## DON, Mock; different genotypes

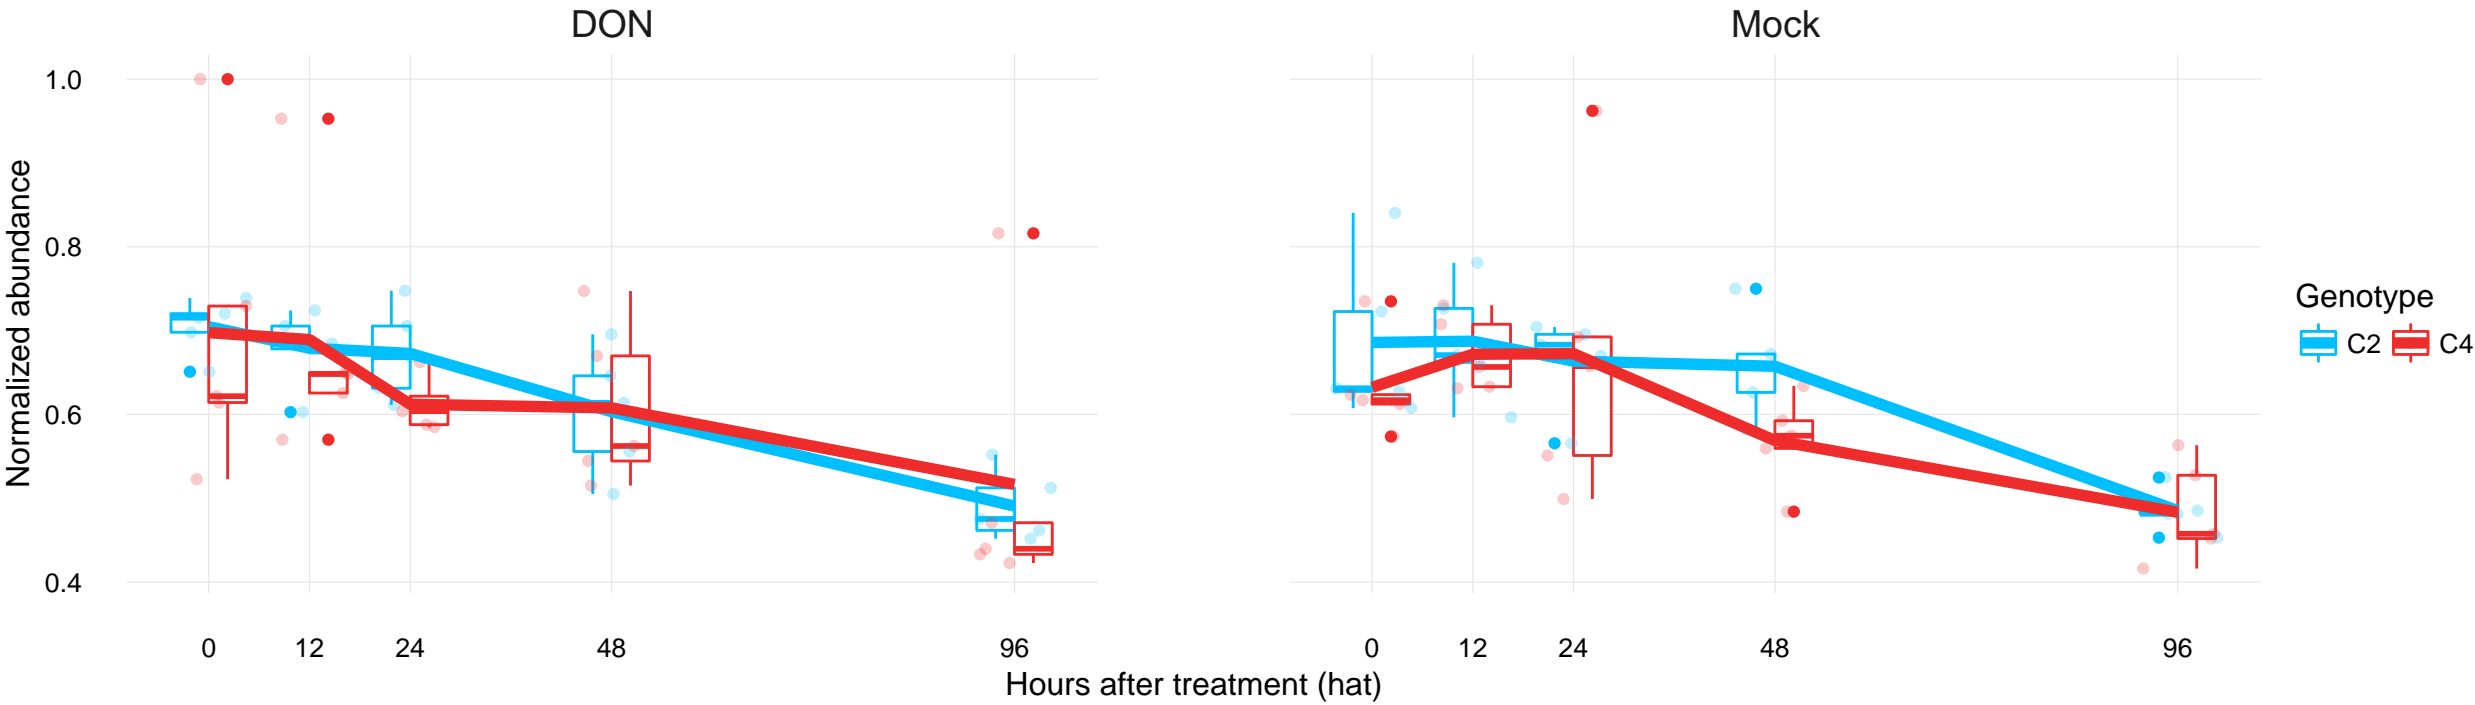

## CM, Remus; different treatments

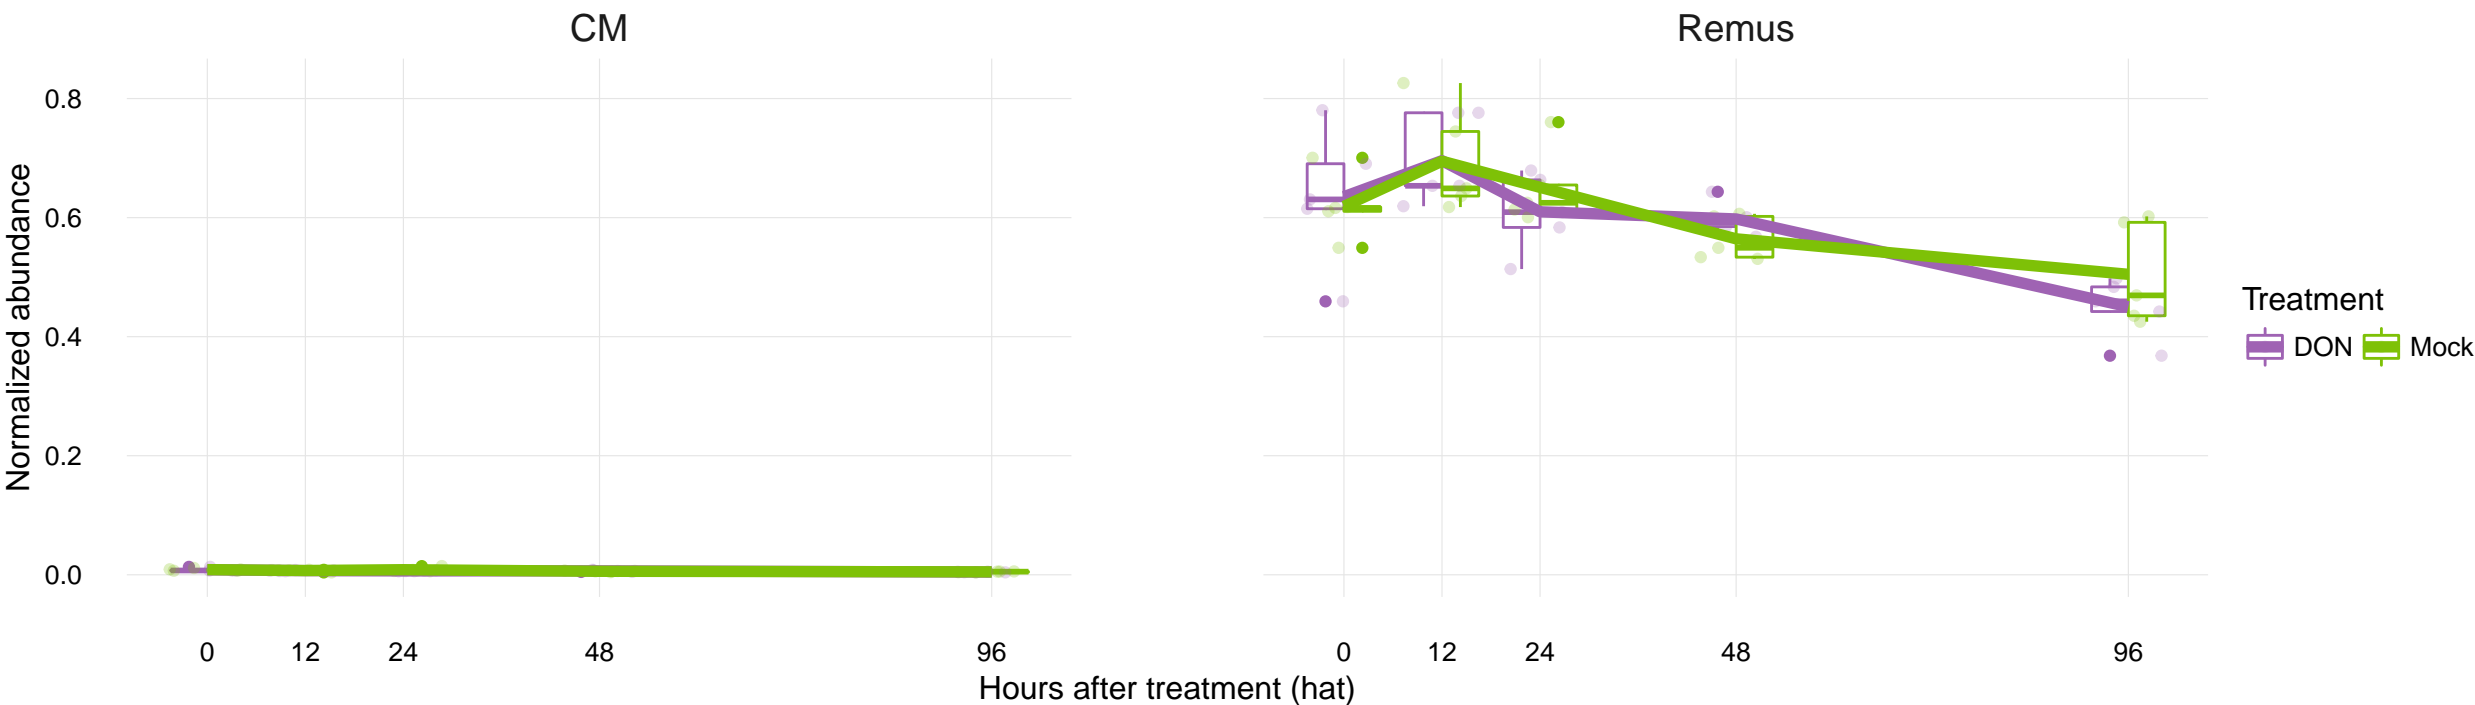

## DON, Mock; all four genotypes

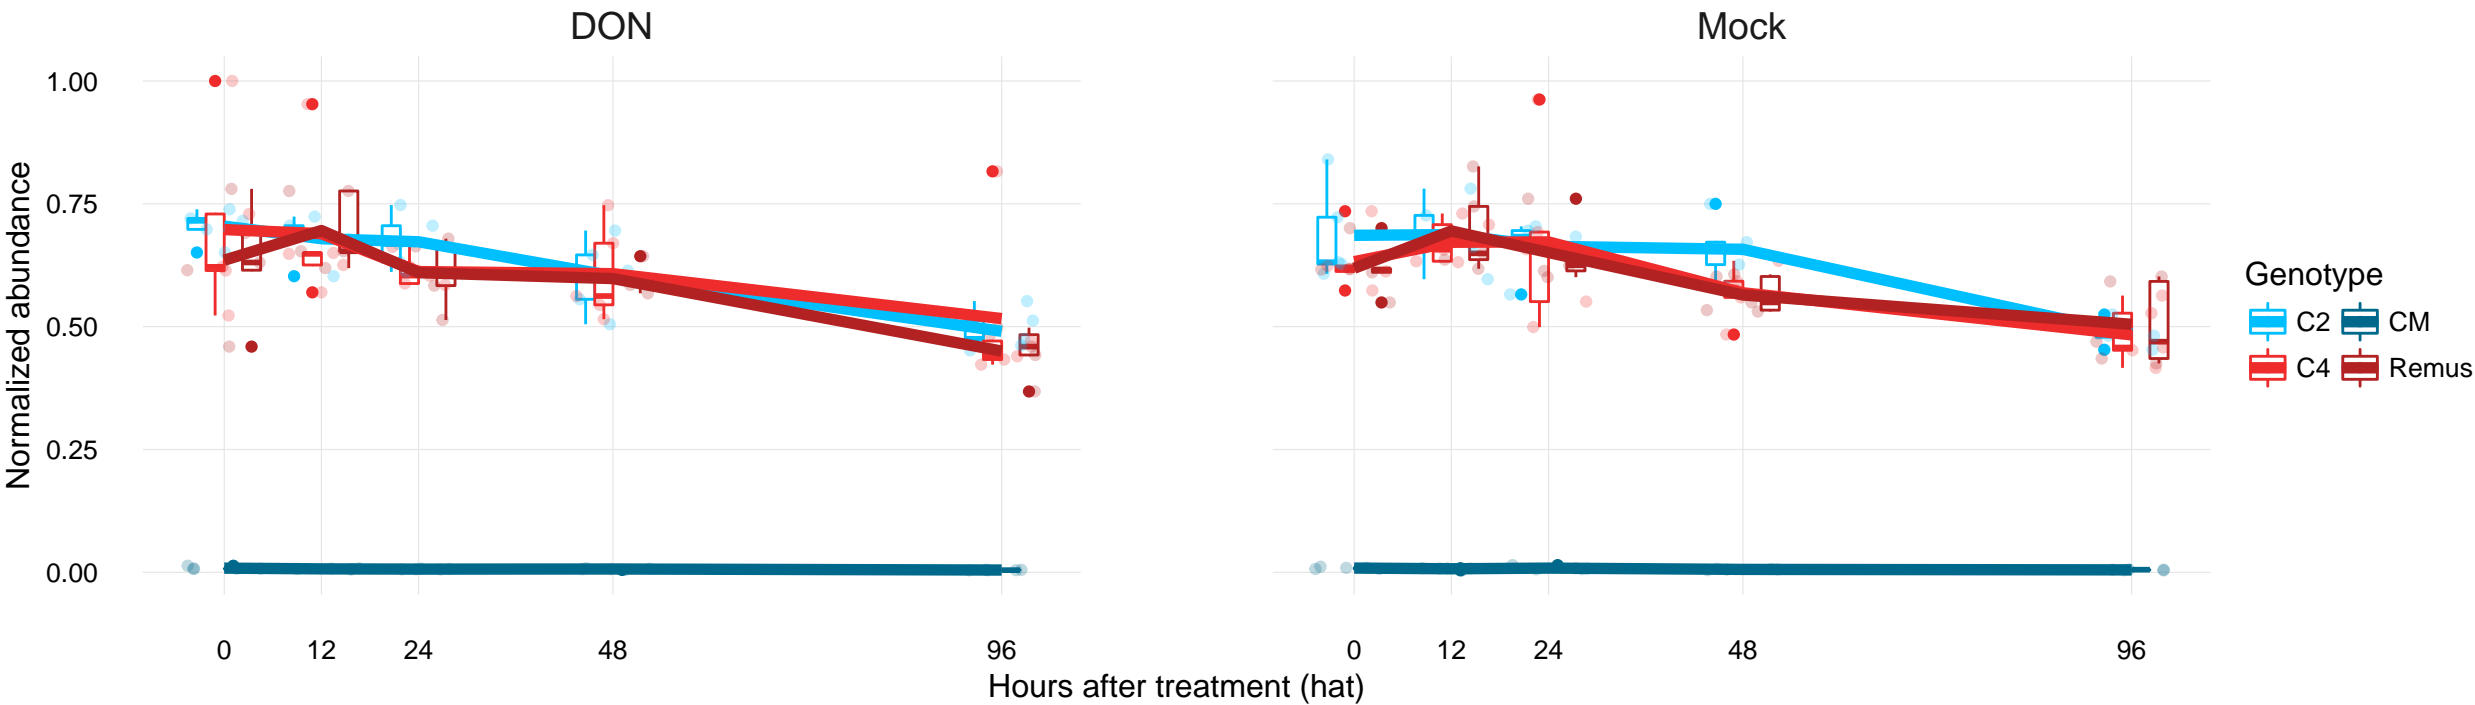



# A.15

Annotated as others (Phenol)  
(1 database hit)

|                |                                                |
|----------------|------------------------------------------------|
| MZ             | 127.039                                        |
| RT             | 6.67 min                                       |
| Normalization  | Indirectly via surrogate<br>in the KPX samples |
| Cluster        | —                                              |
| Cn total / Phe | 6 /                                            |

## C2, C4; different treatments

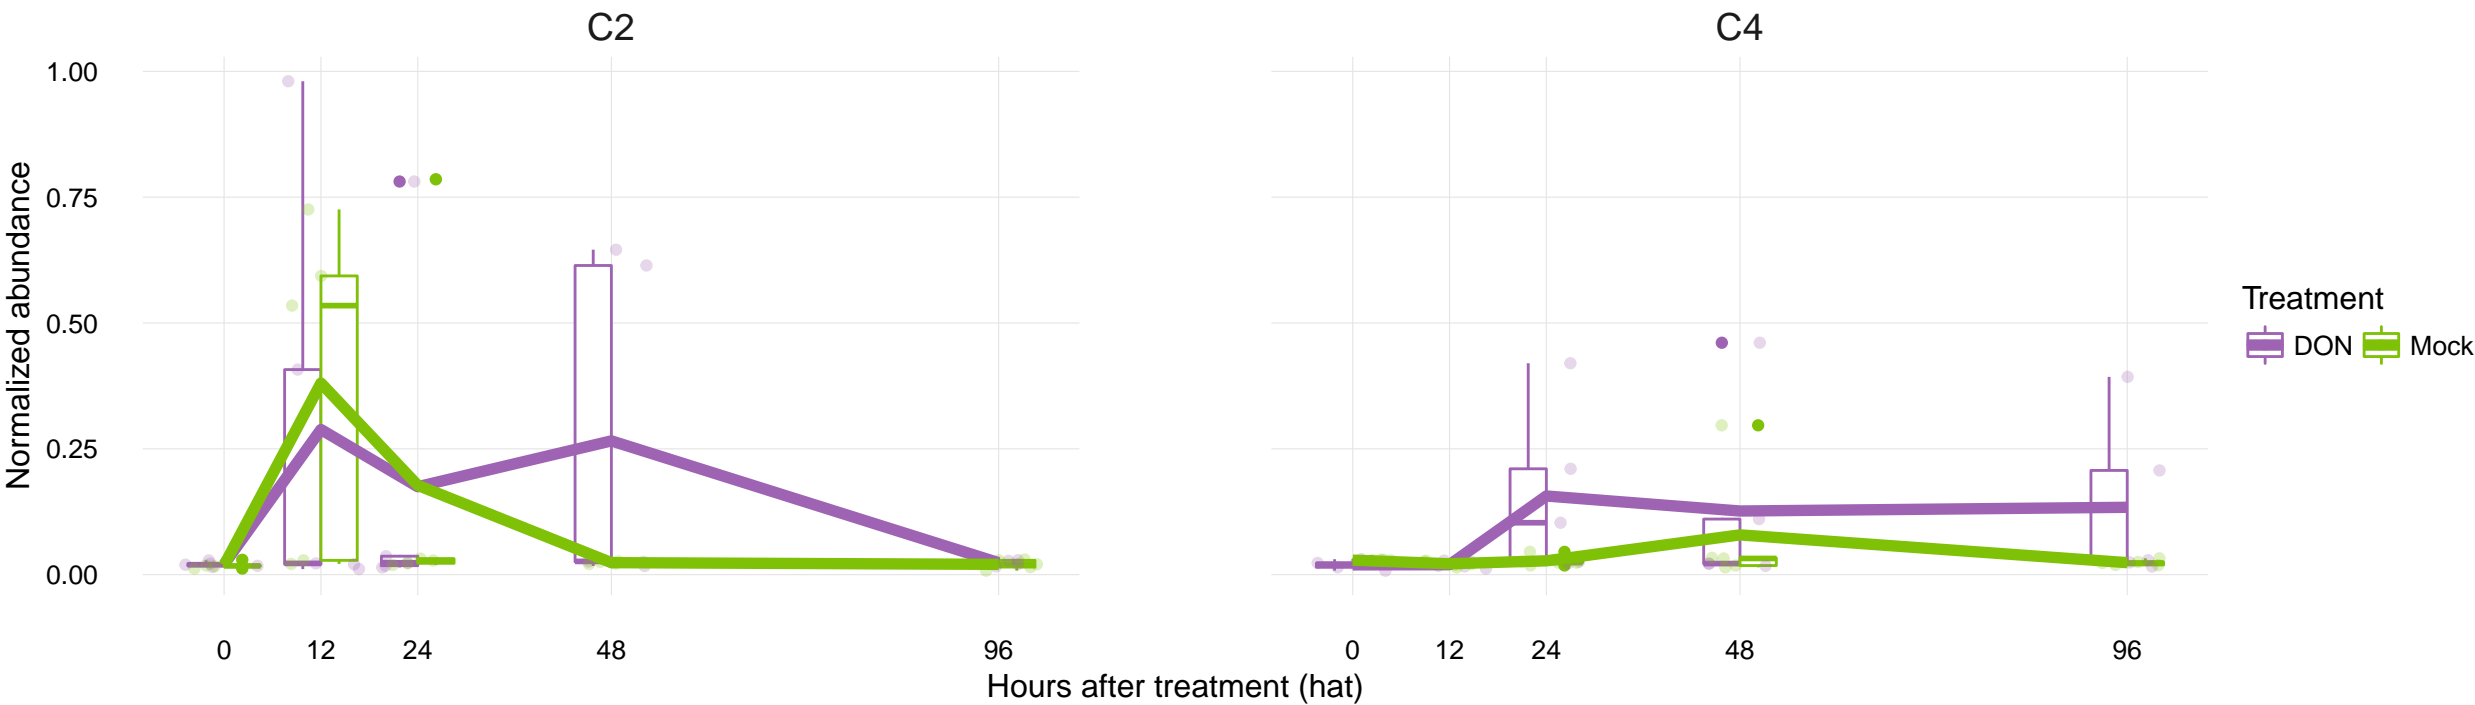

## DON, Mock; different genotypes

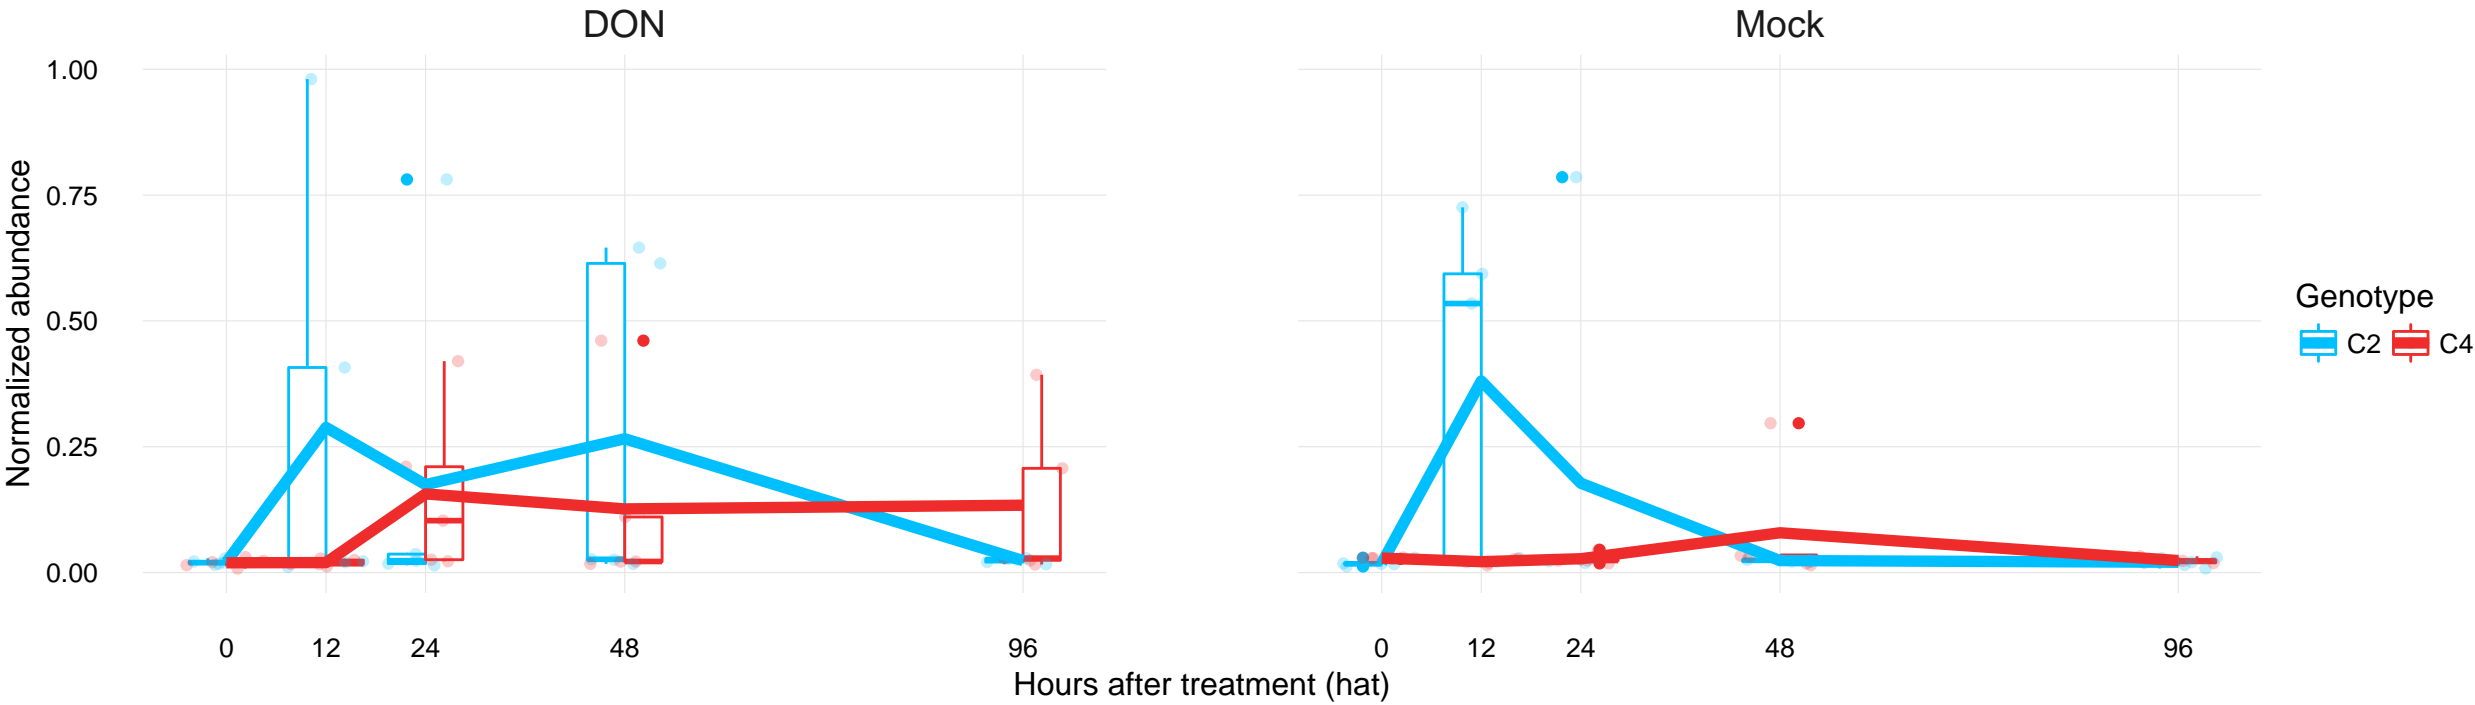

## CM, Remus; different treatments

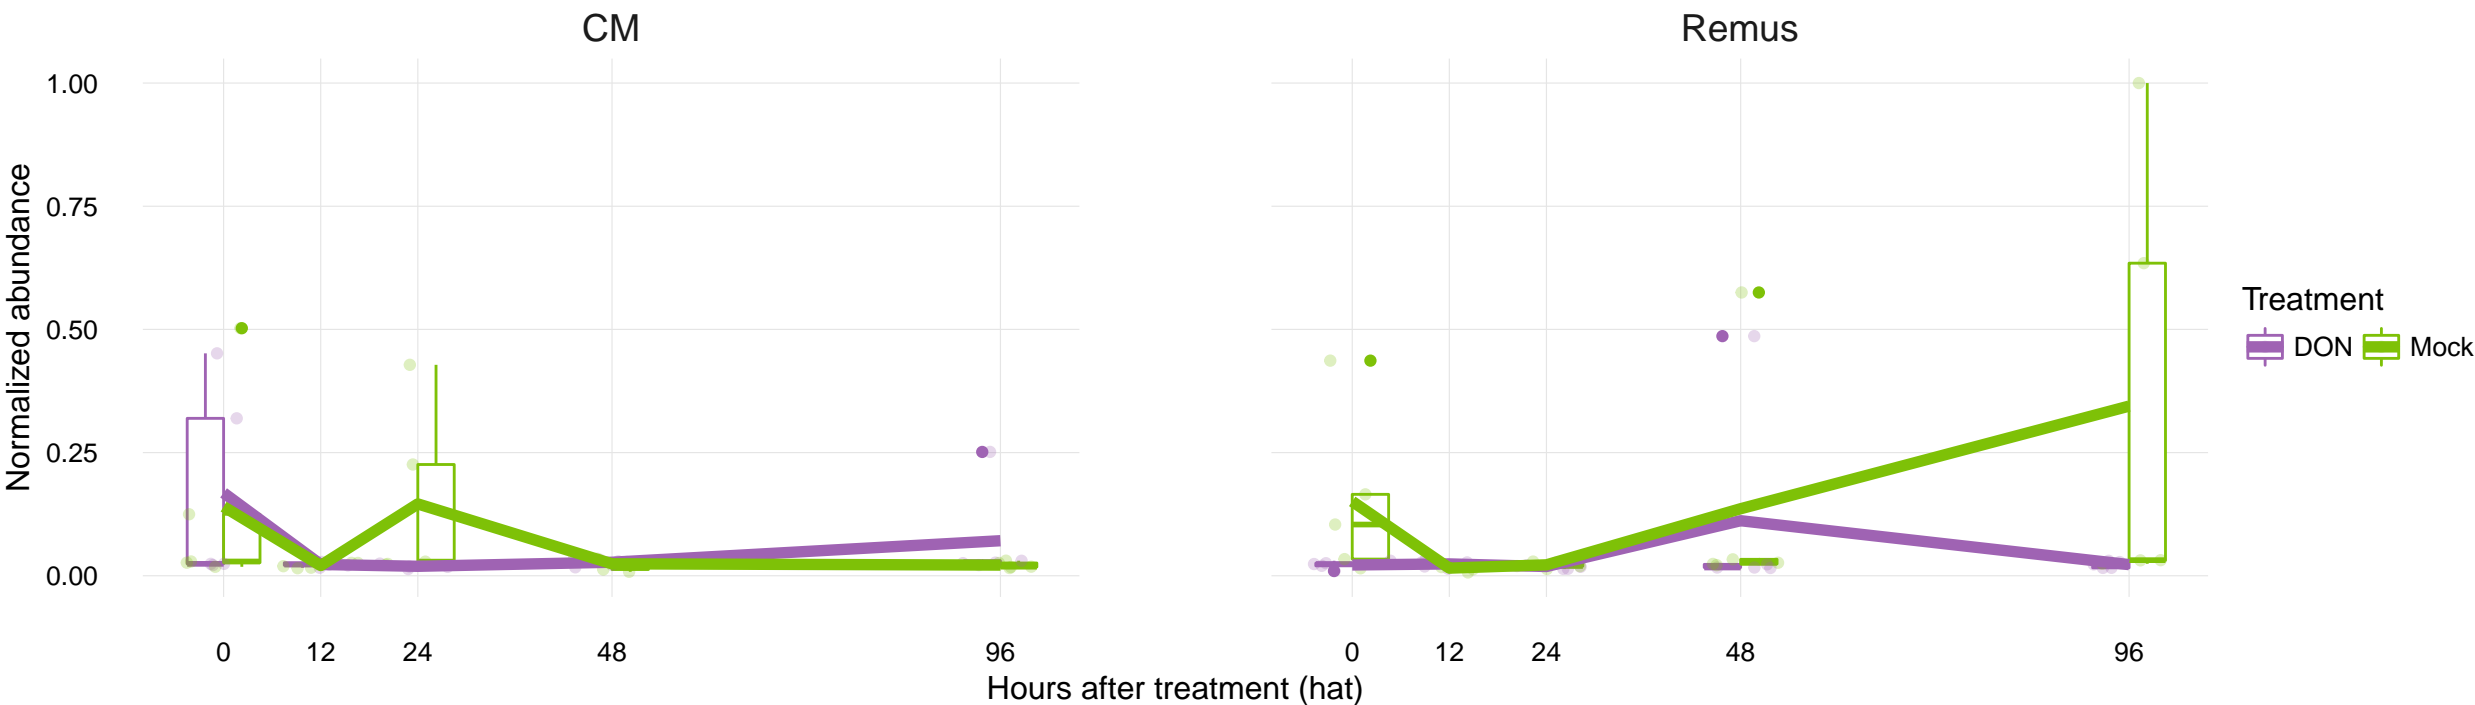

## DON, Mock; all four genotypes

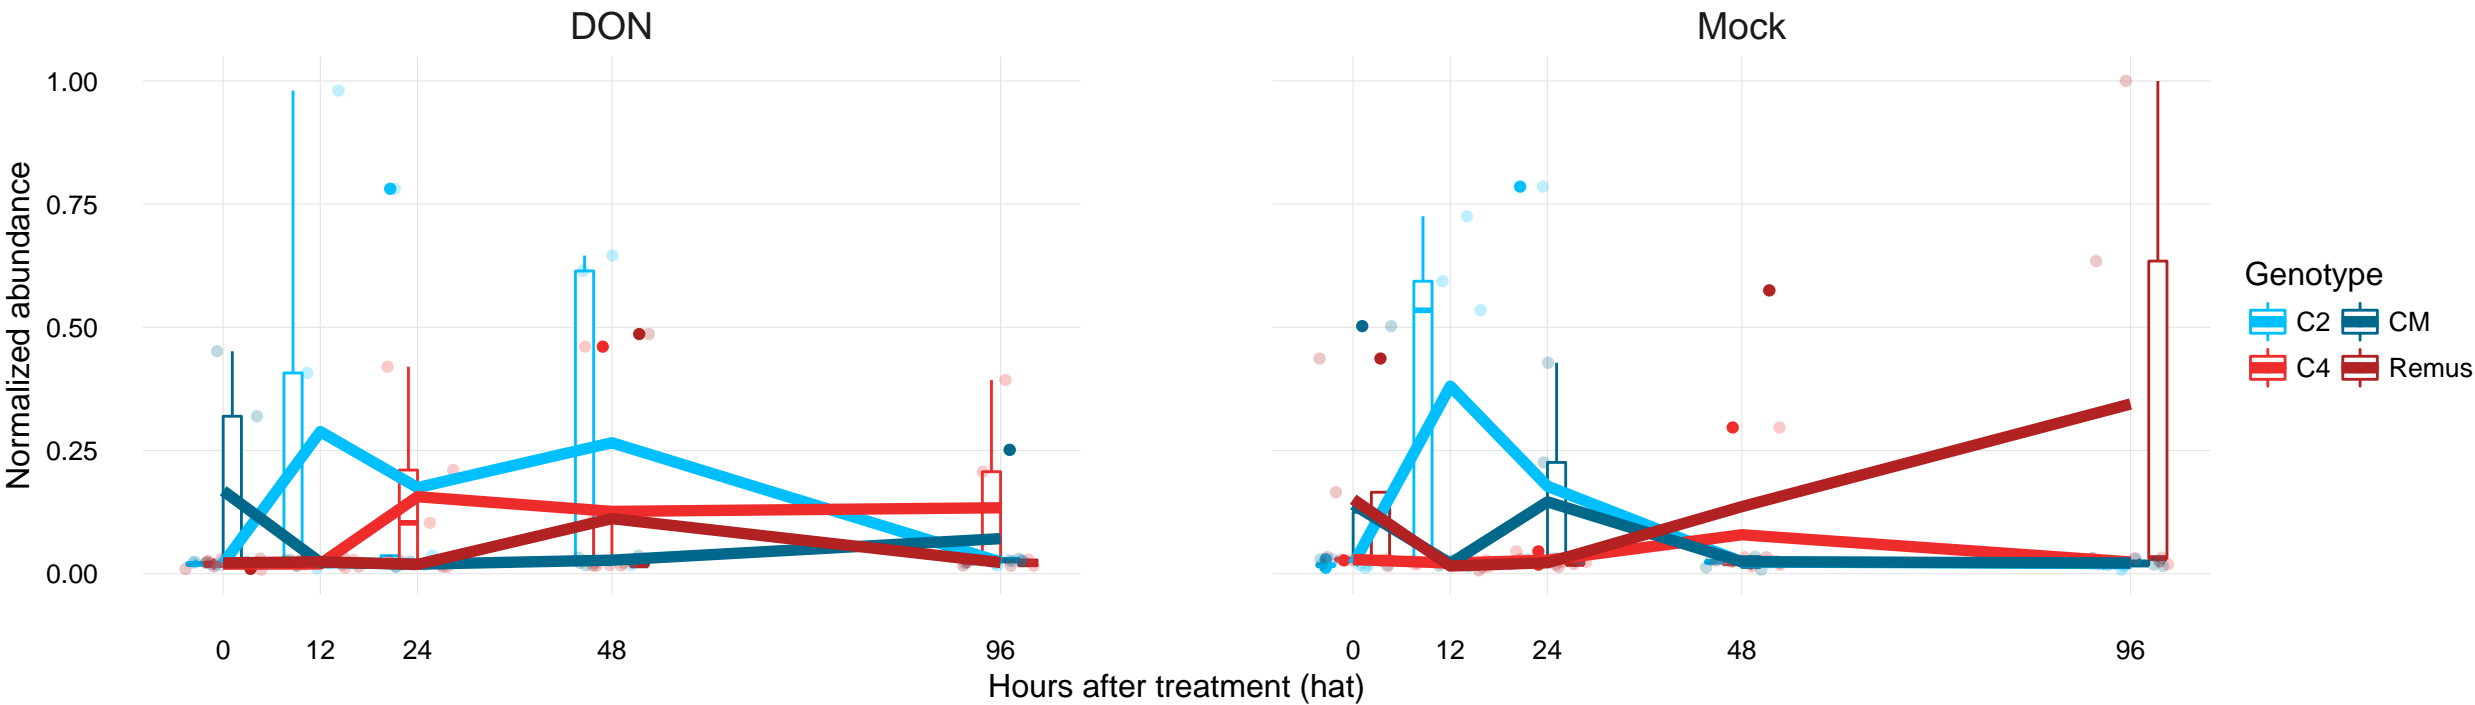

# A.28

Annotated as HCA derivative  
(1 database hit)

|                |                          |
|----------------|--------------------------|
| MZ             | 211.0965                 |
| RT             | 9.19 min                 |
| Normalization  | Directly via KPX samples |
| Cluster        | –                        |
| Cn total / Phe | 10 /                     |

## C2, C4; different treatments

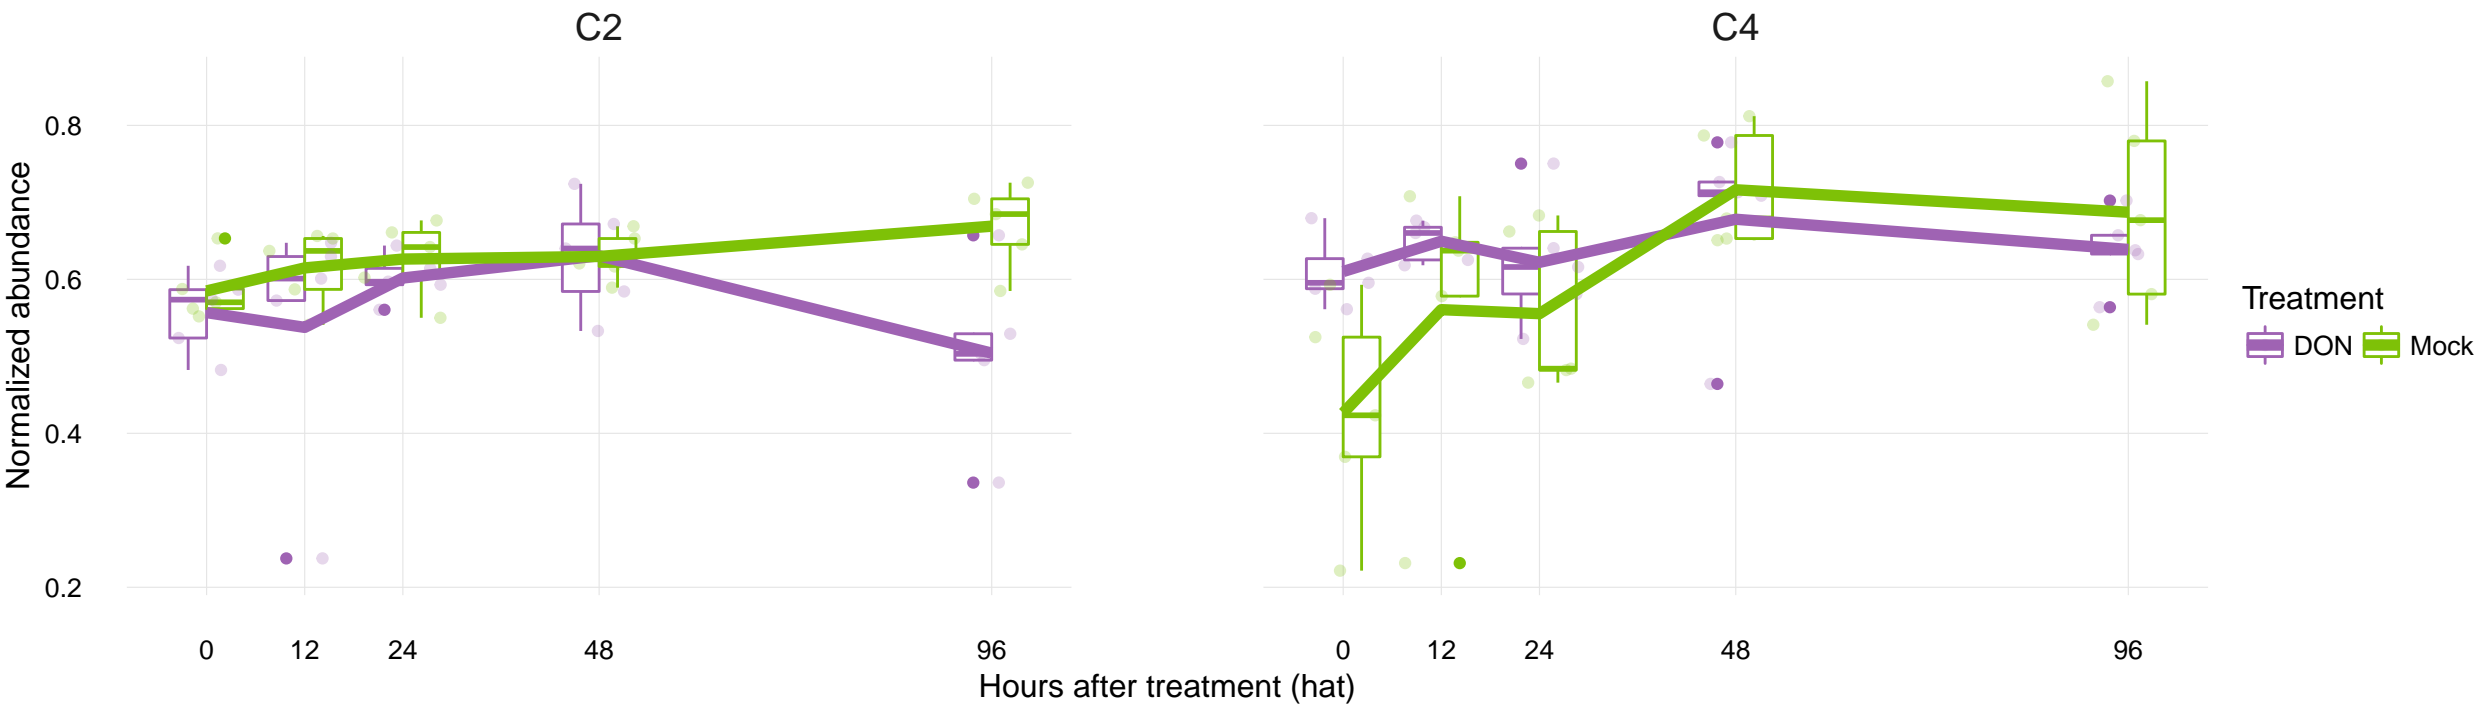

## DON, Mock; different genotypes

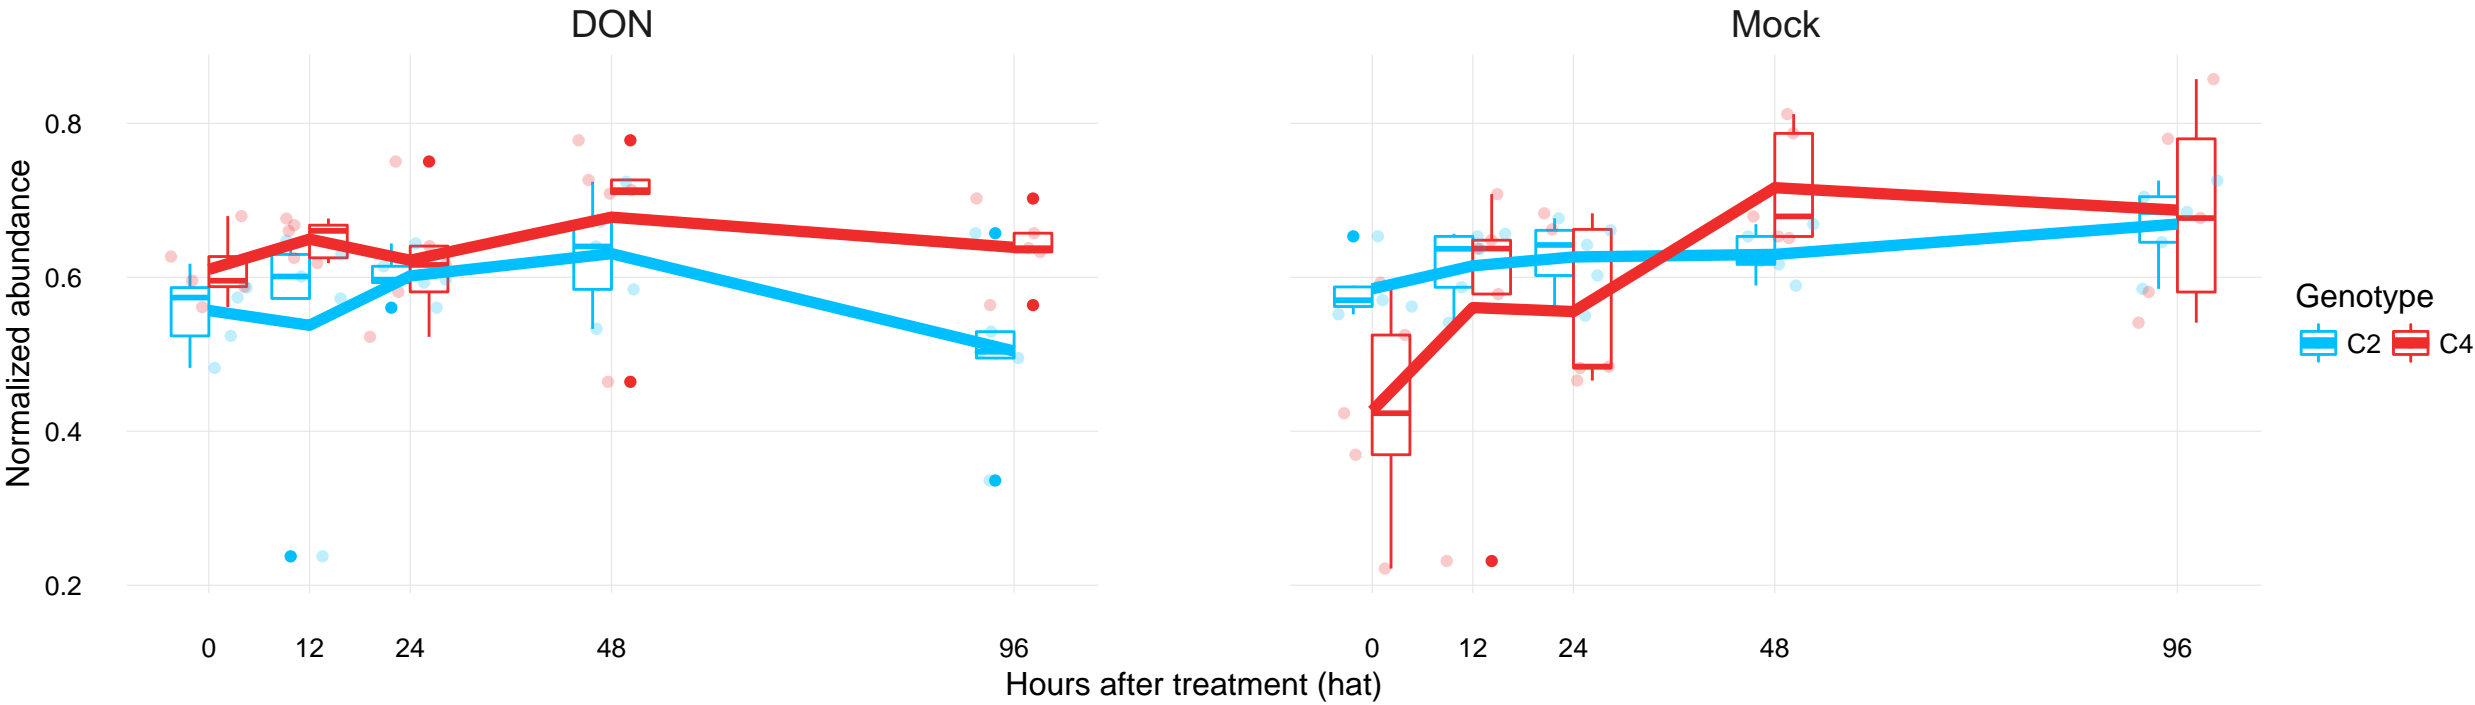

## CM, Remus; different treatments

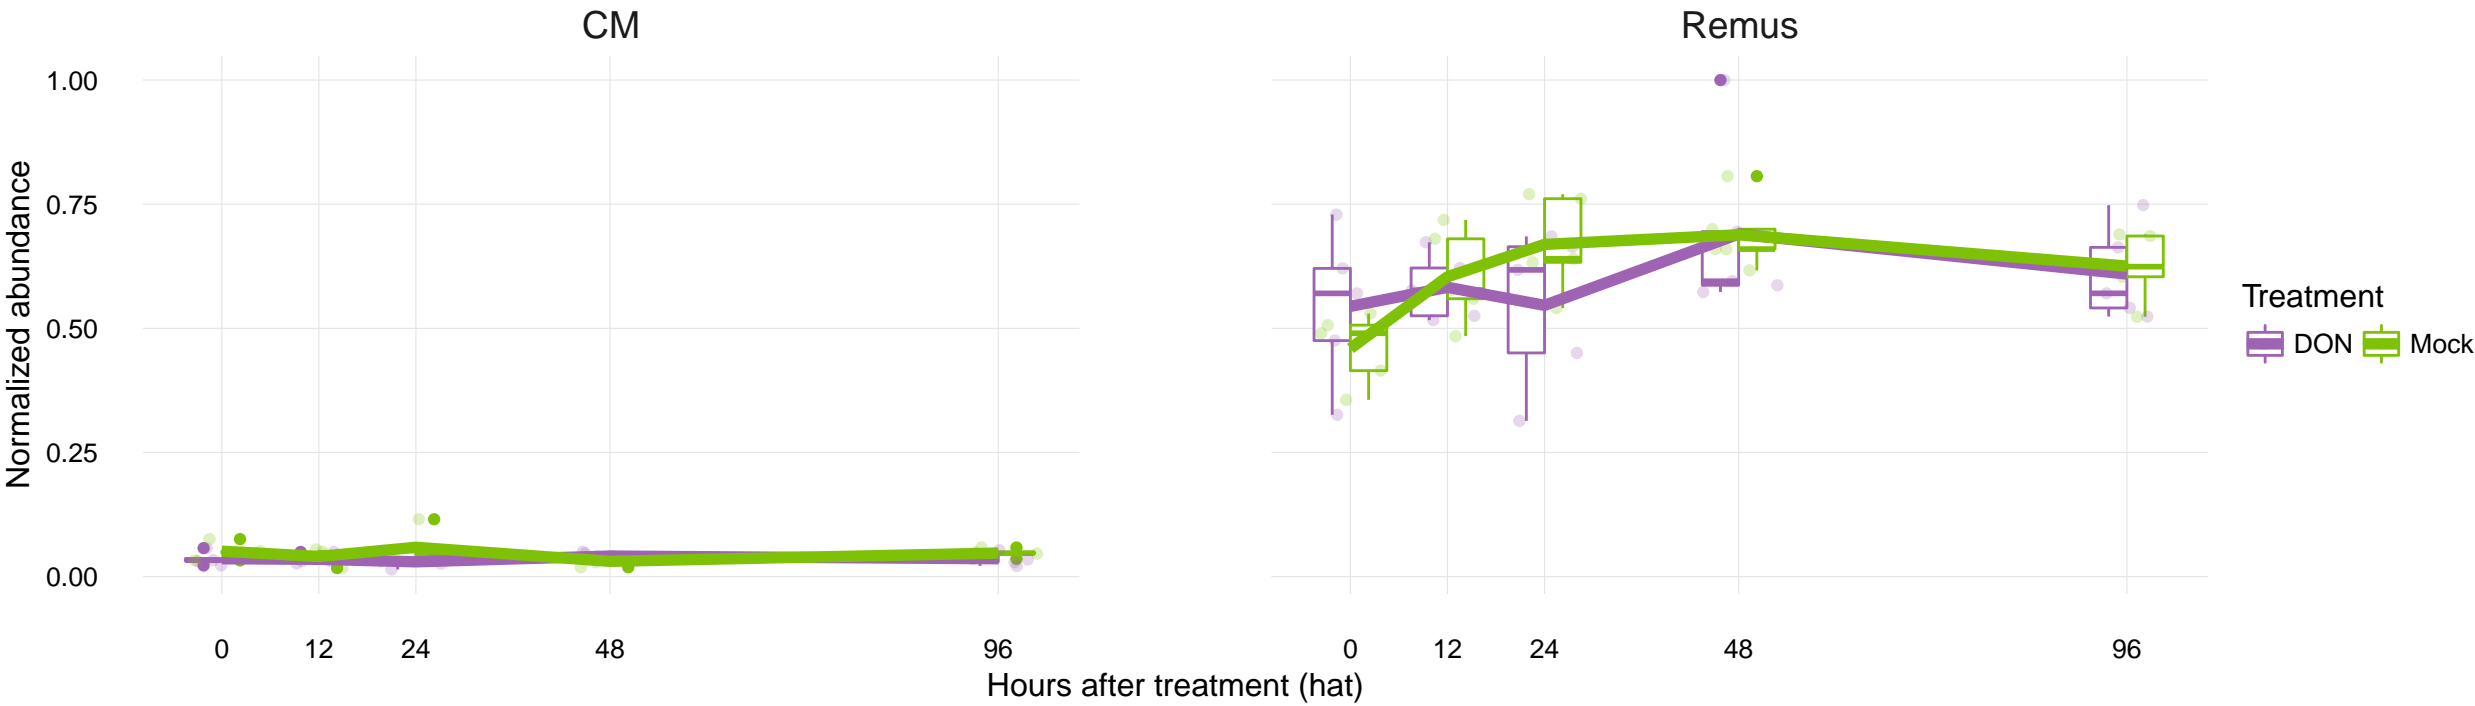

## DON, Mock; all four genotypes

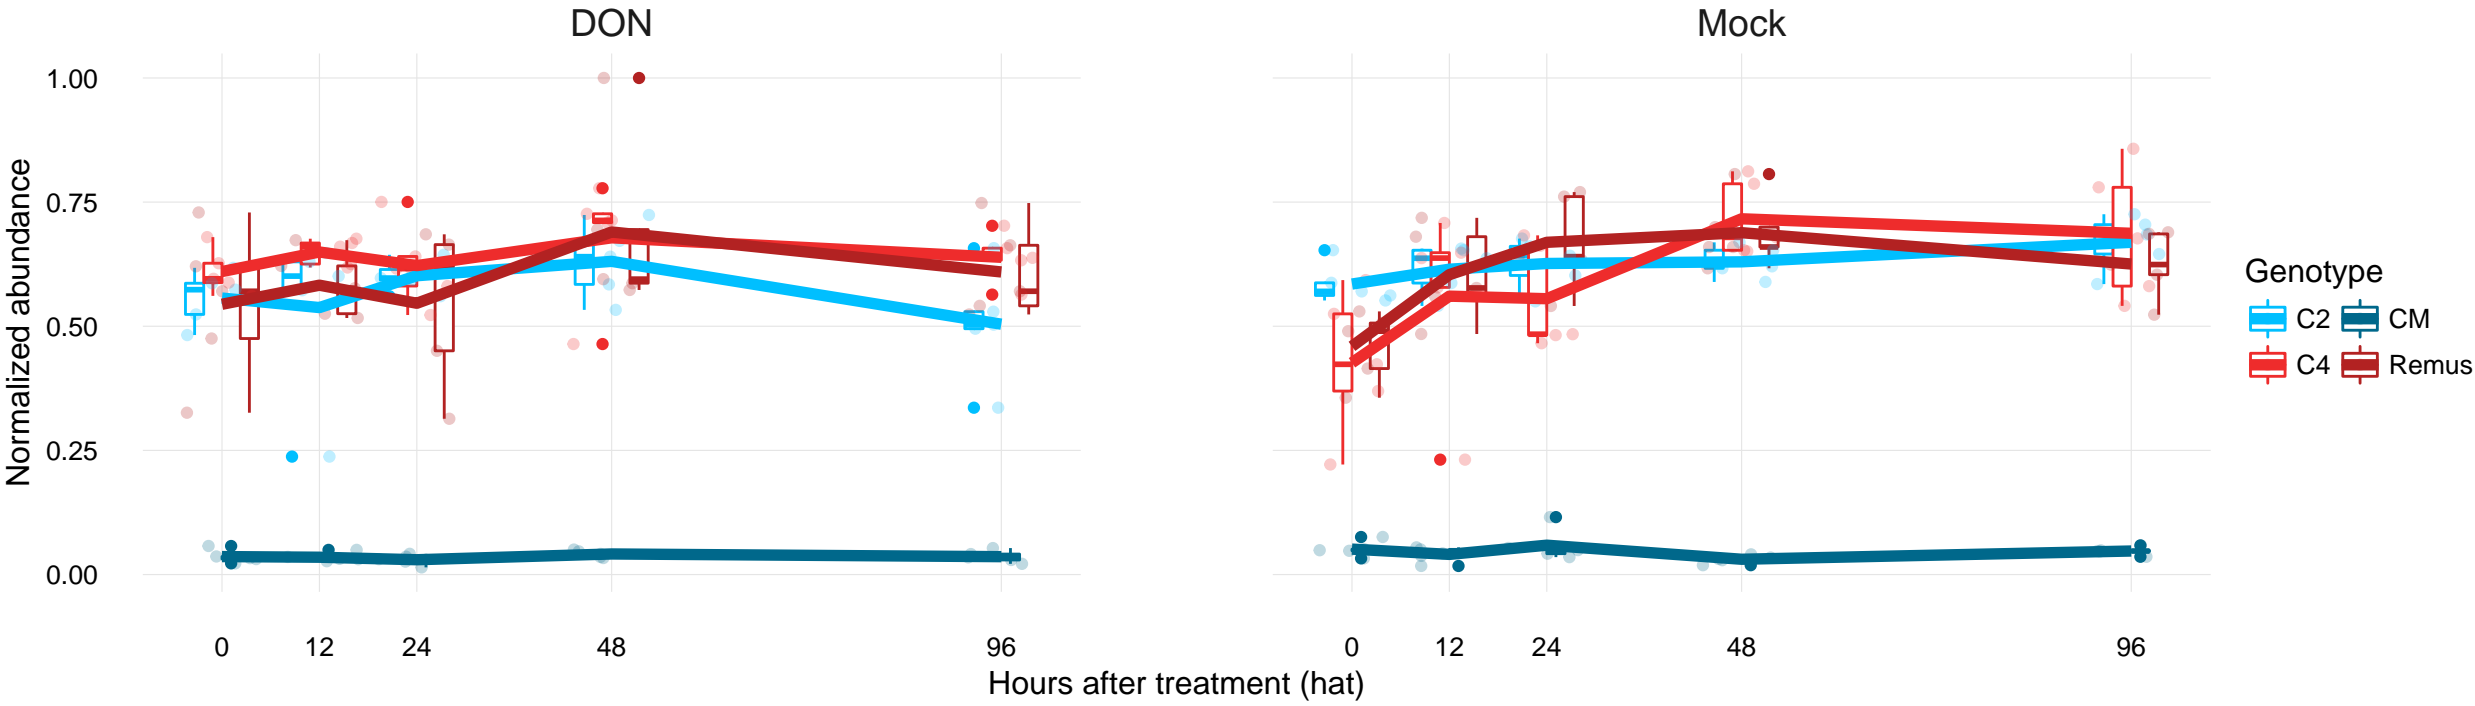

# Vanillin

Identified metabolite (level 1)

|                |                                             |
|----------------|---------------------------------------------|
| MZ             | 153.0546                                    |
| RT             | 11.63 min                                   |
| Normalization  | Indirectly via surrogate in the KPX samples |
| Cluster        | –                                           |
| Cn total / Phe | 8 / 7                                       |

C2, C4; different treatments

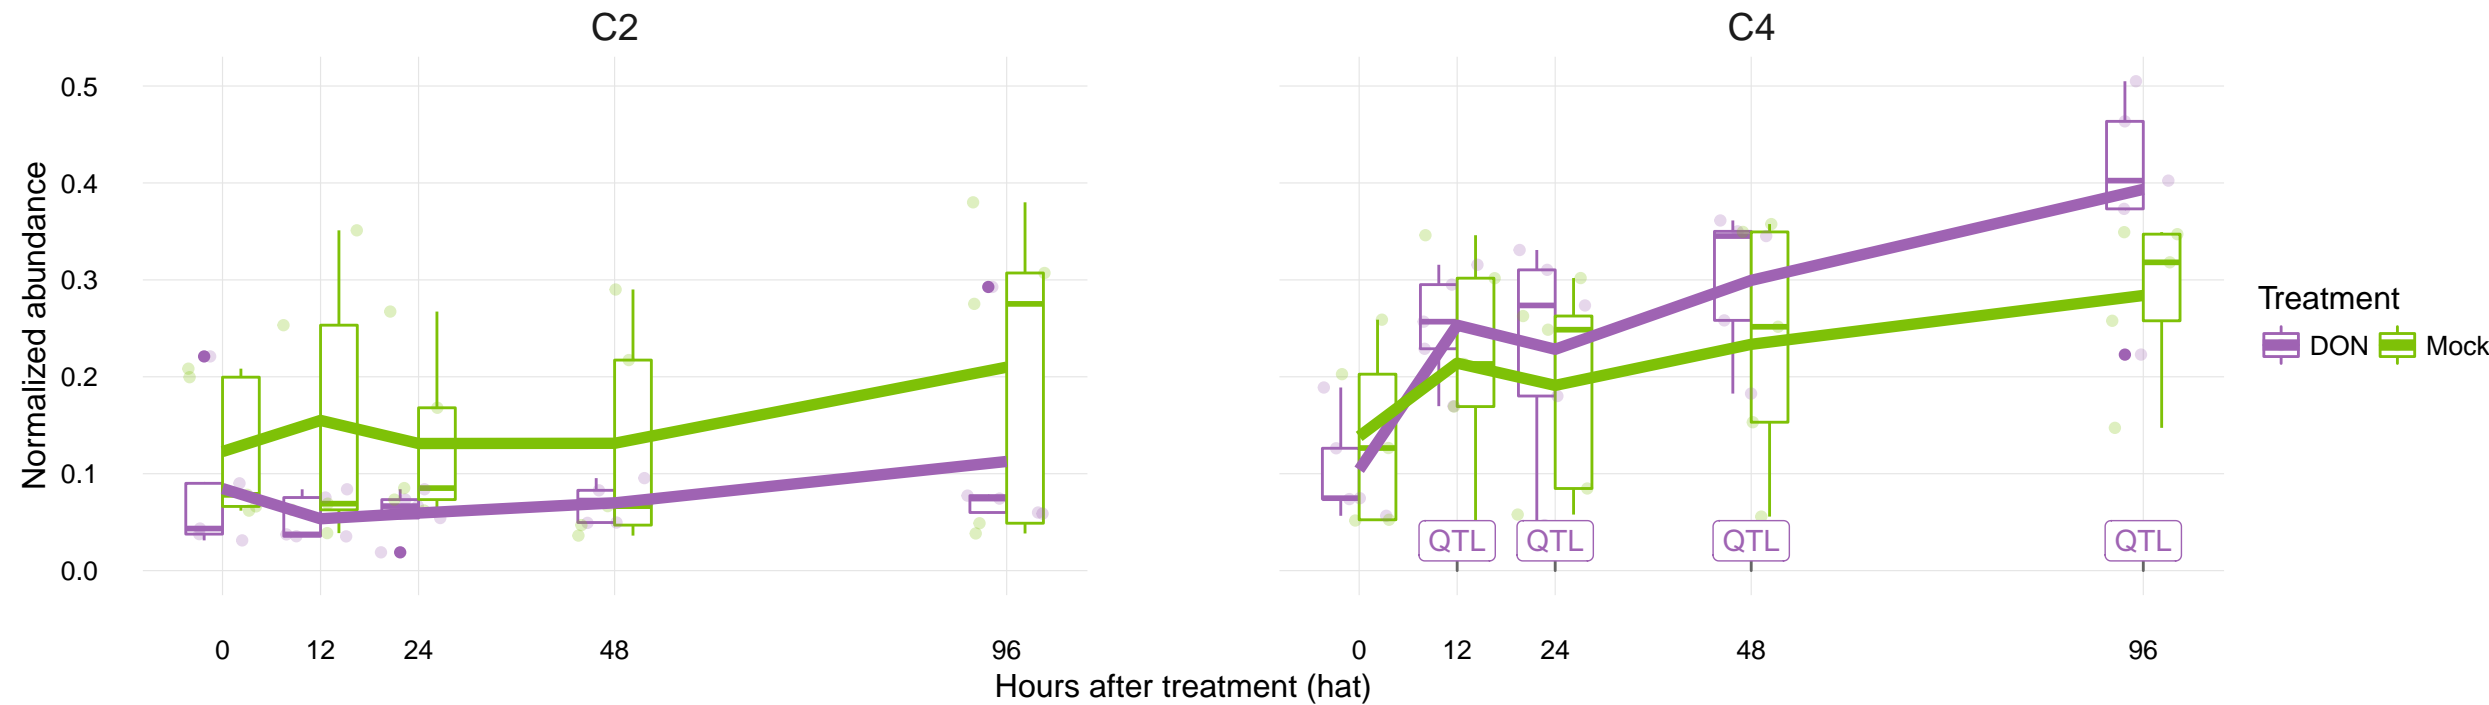

DON, Mock; different genotypes

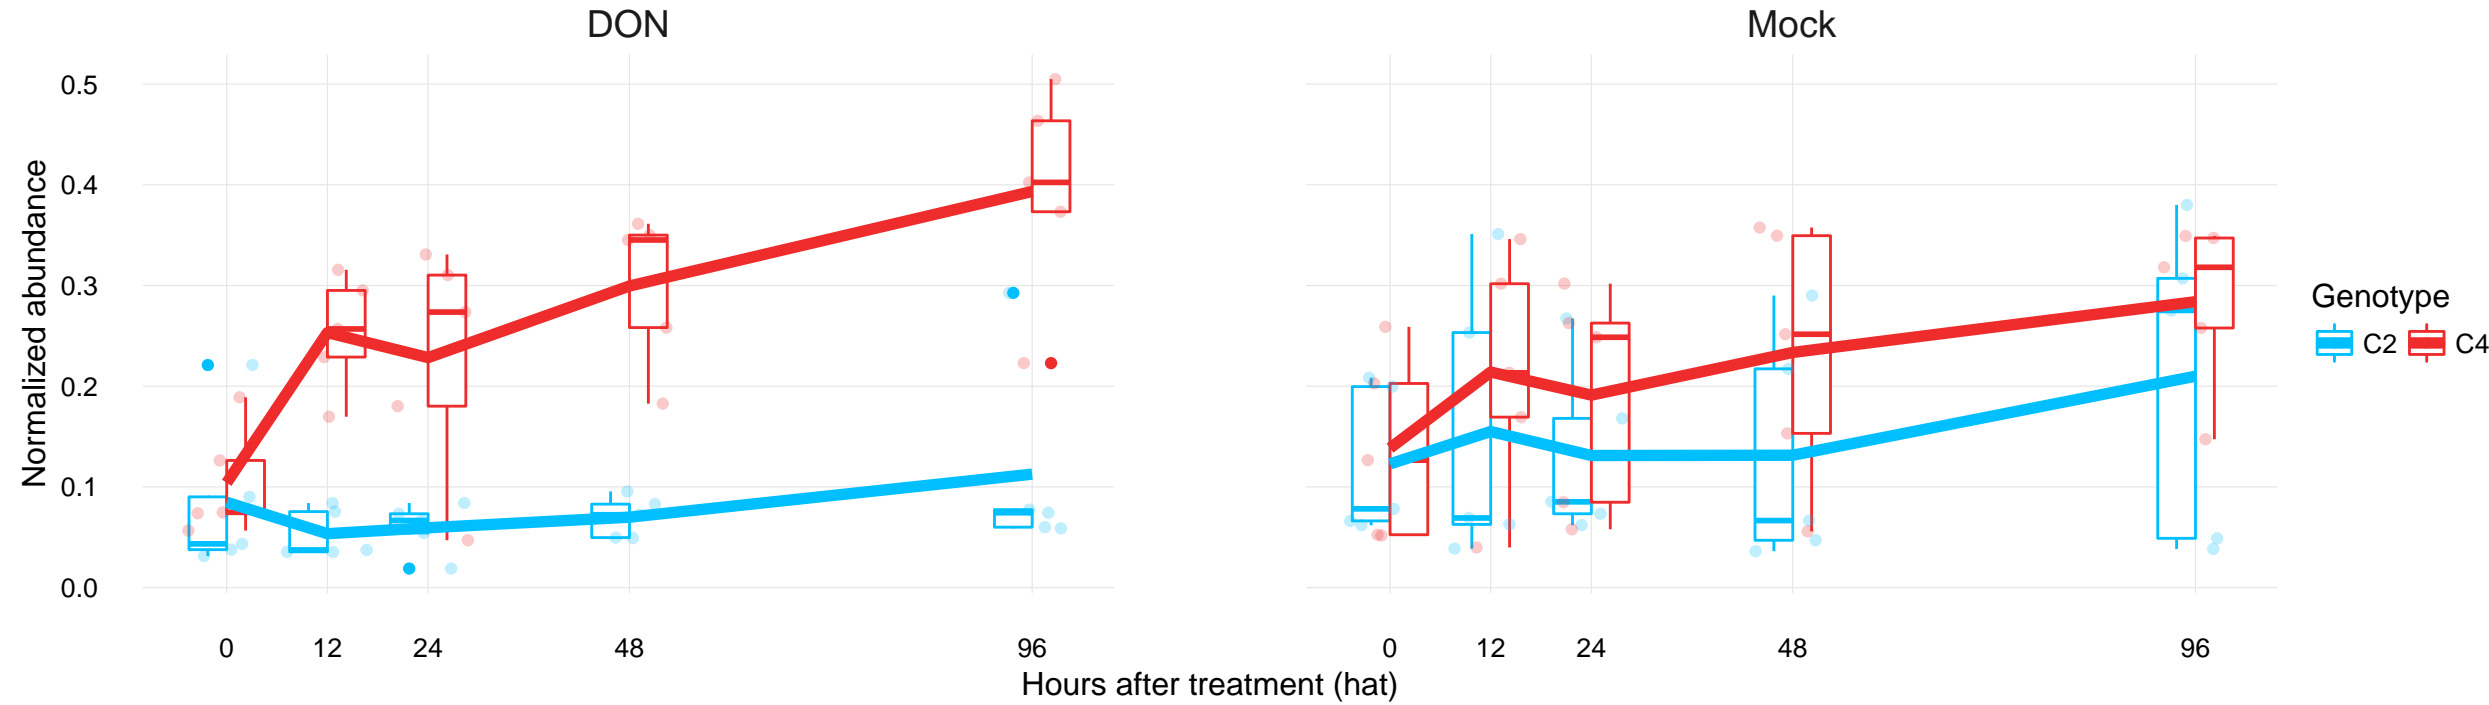

CM, Remus; different treatments

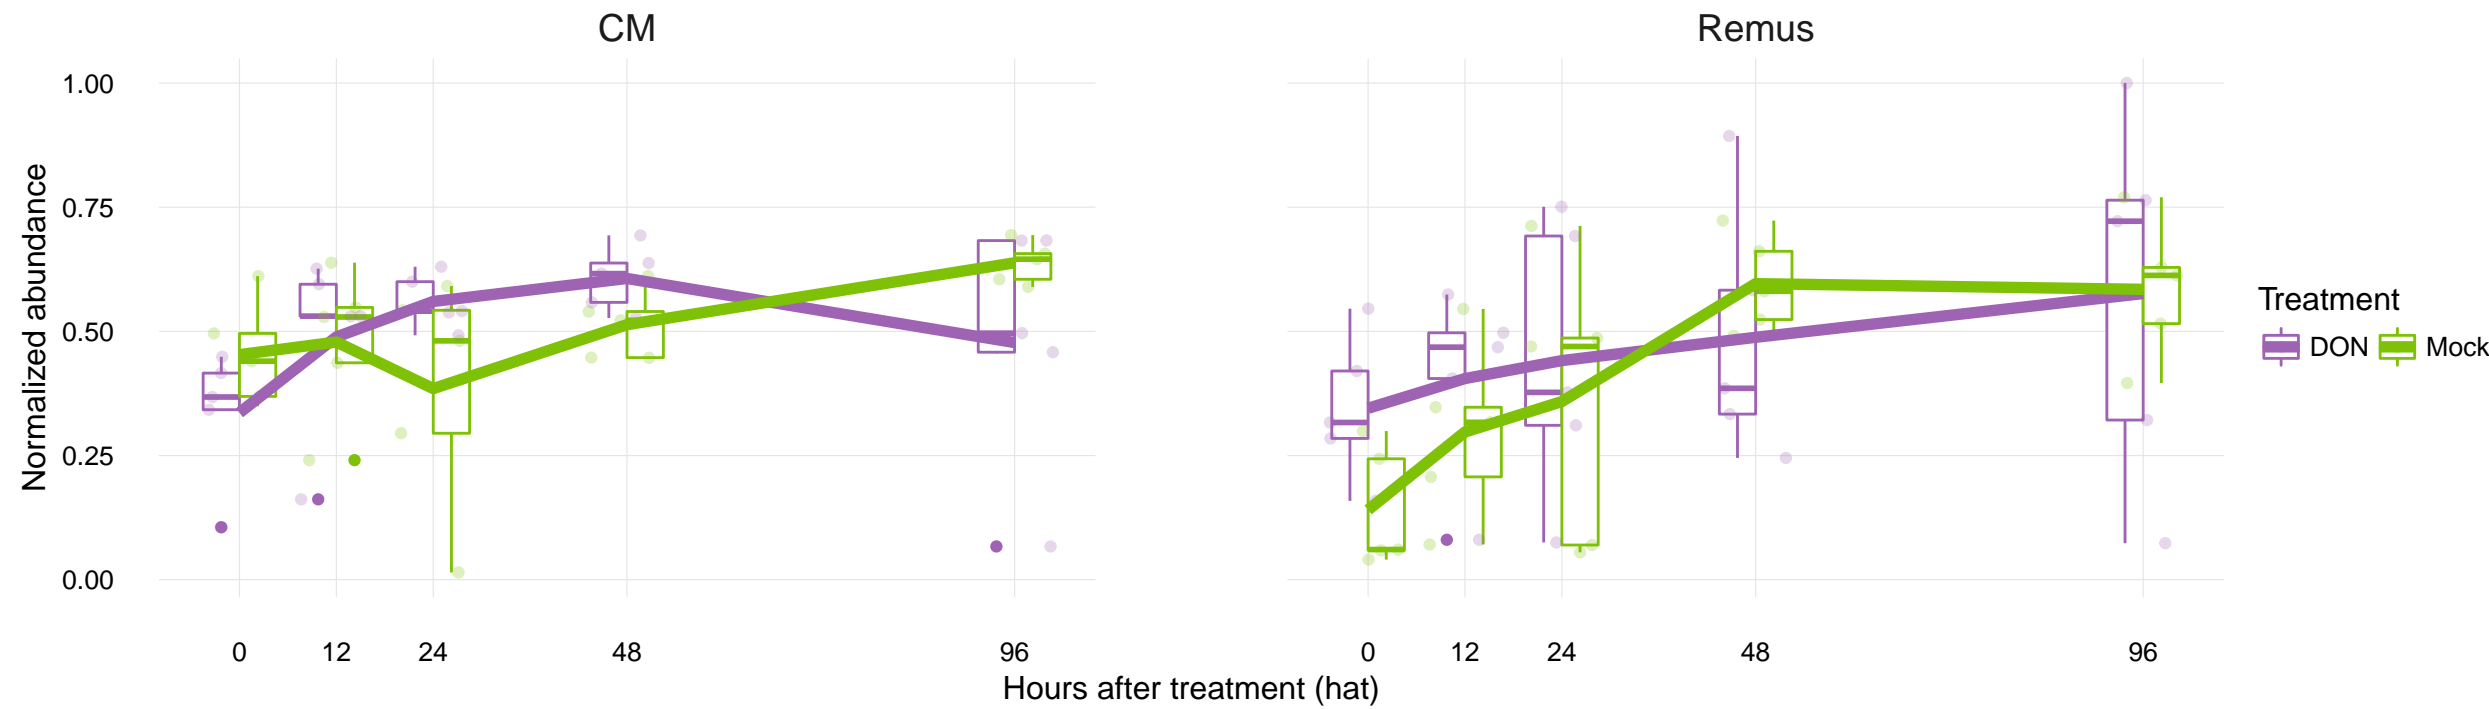

DON, Mock; all four genotypes

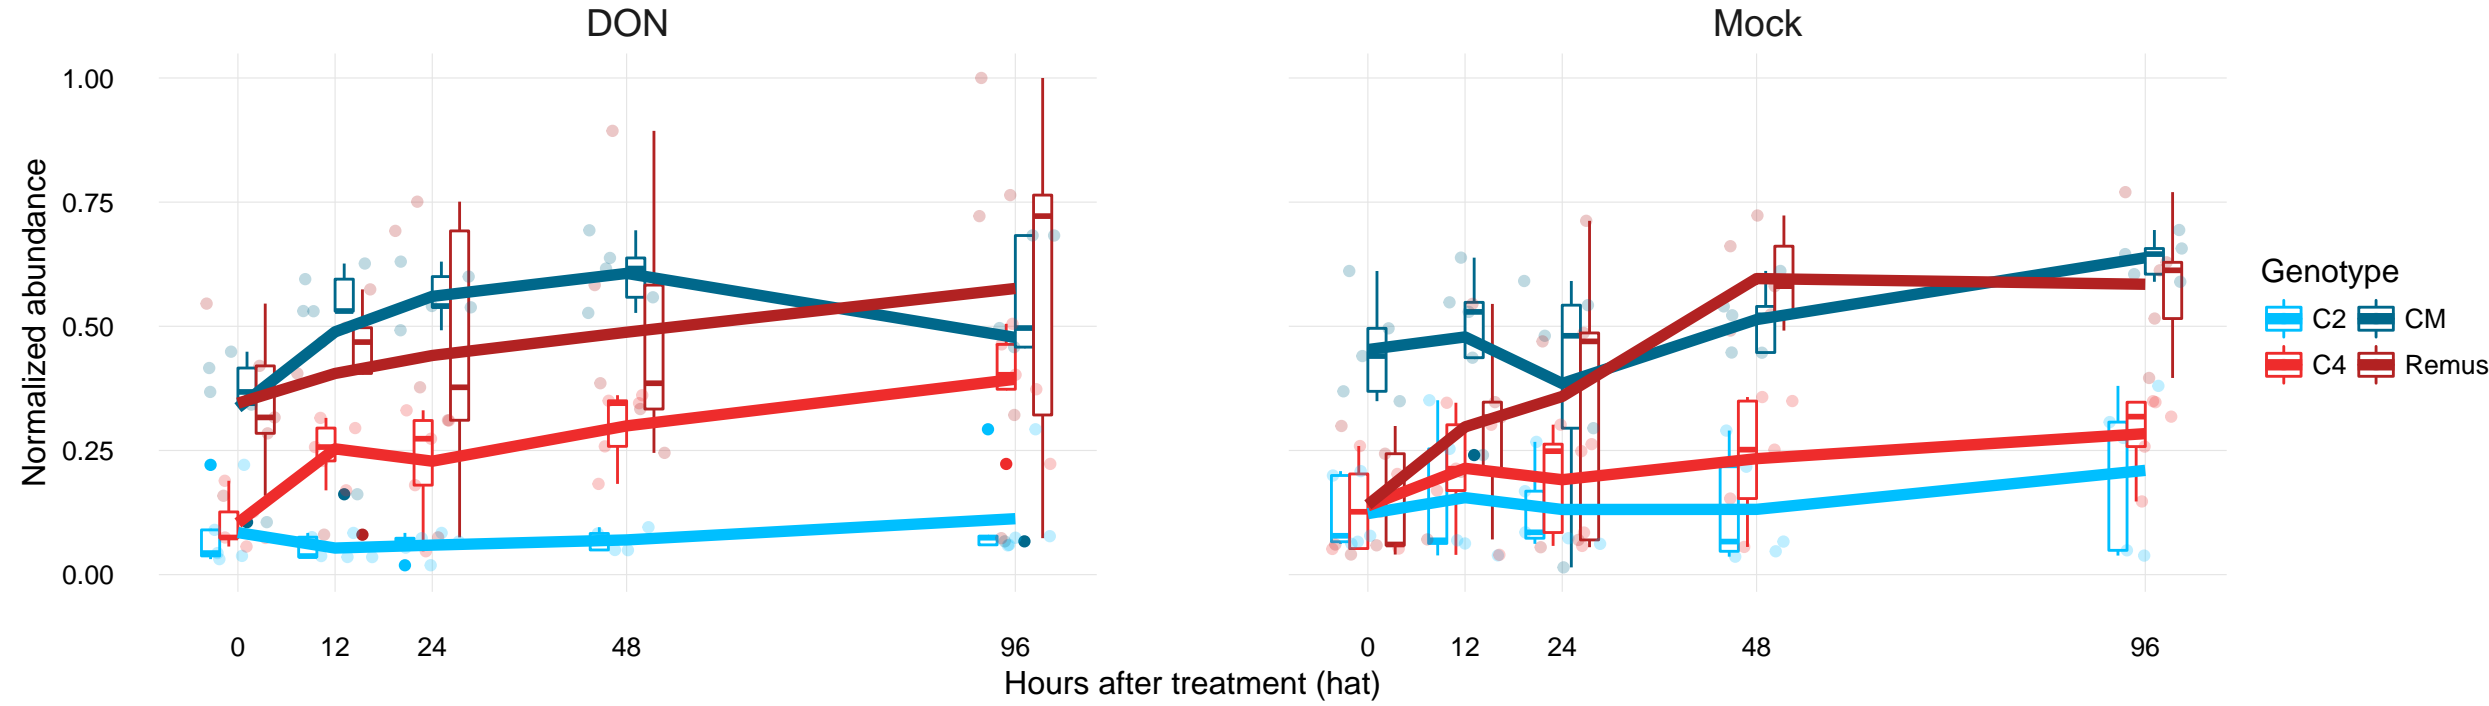

# A.37

Annotated as HCA derivative  
(1 database hit)

|                |                                                |
|----------------|------------------------------------------------|
| MZ             | 536.1974                                       |
| RT             | 10.28 min                                      |
| Normalization  | Indirectly via surrogate<br>in the KPX samples |
| Cluster        | –                                              |
| Cn total / Phe | 22 / 9                                         |

## C2, C4; different treatments

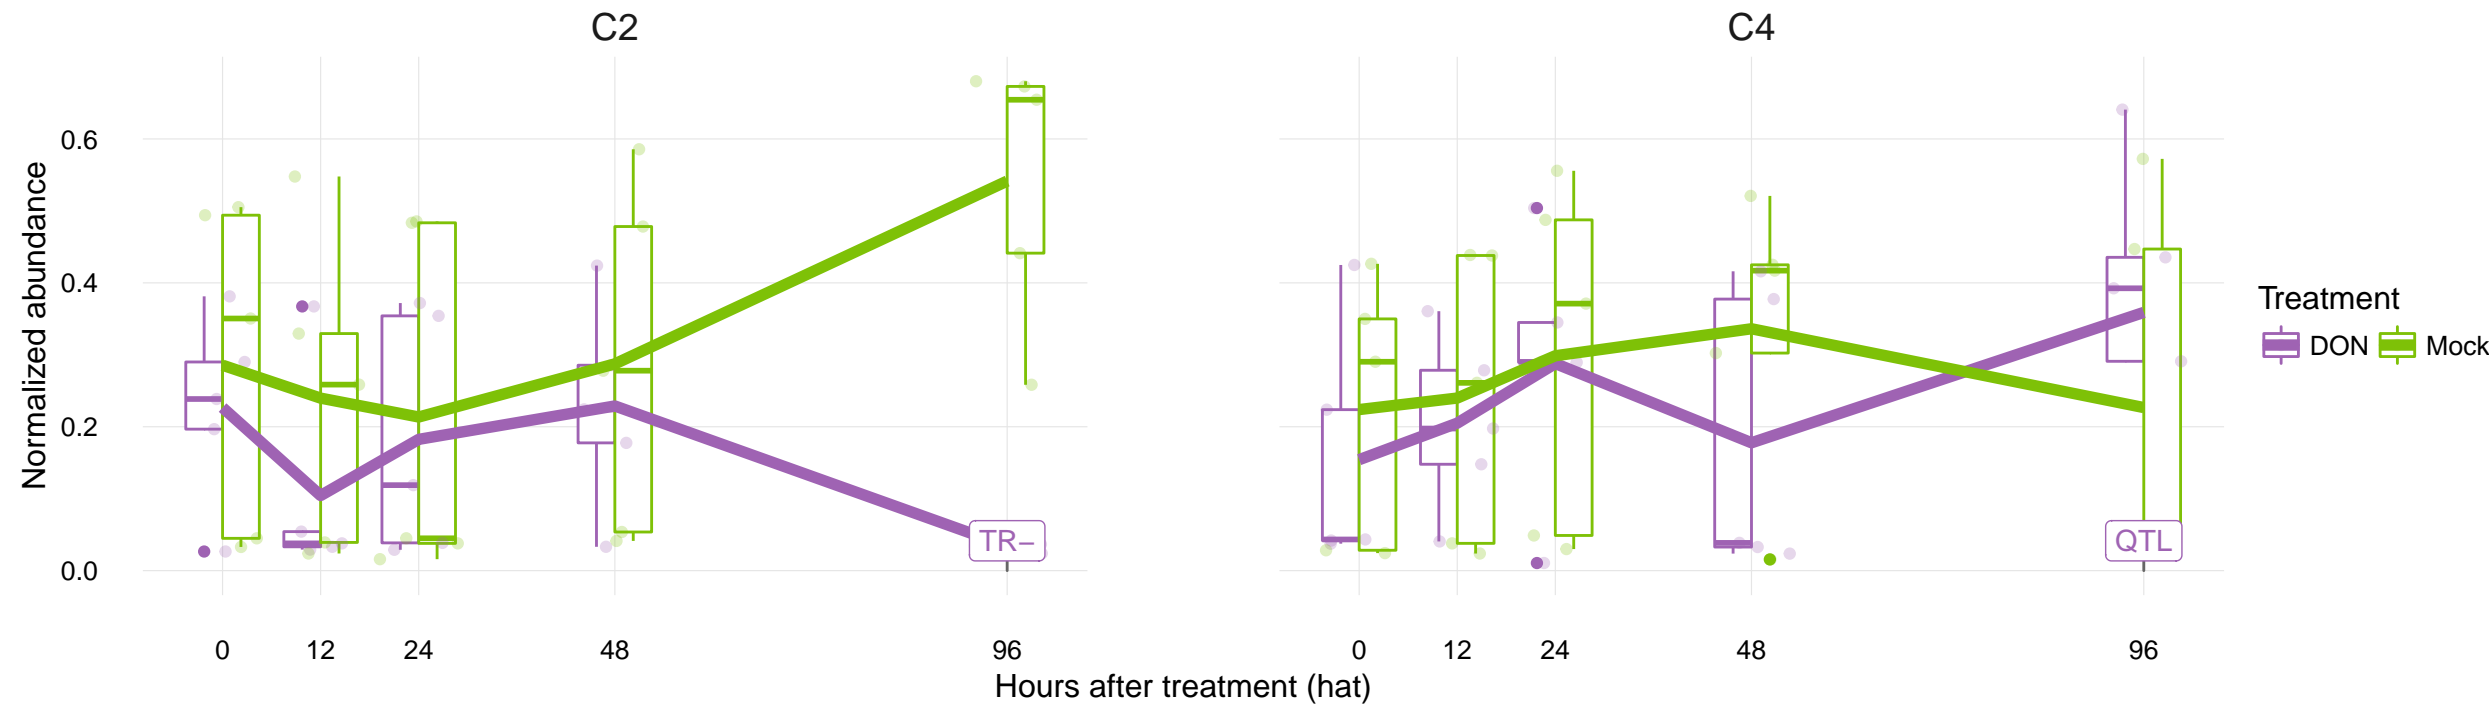

## DON, Mock; different genotypes

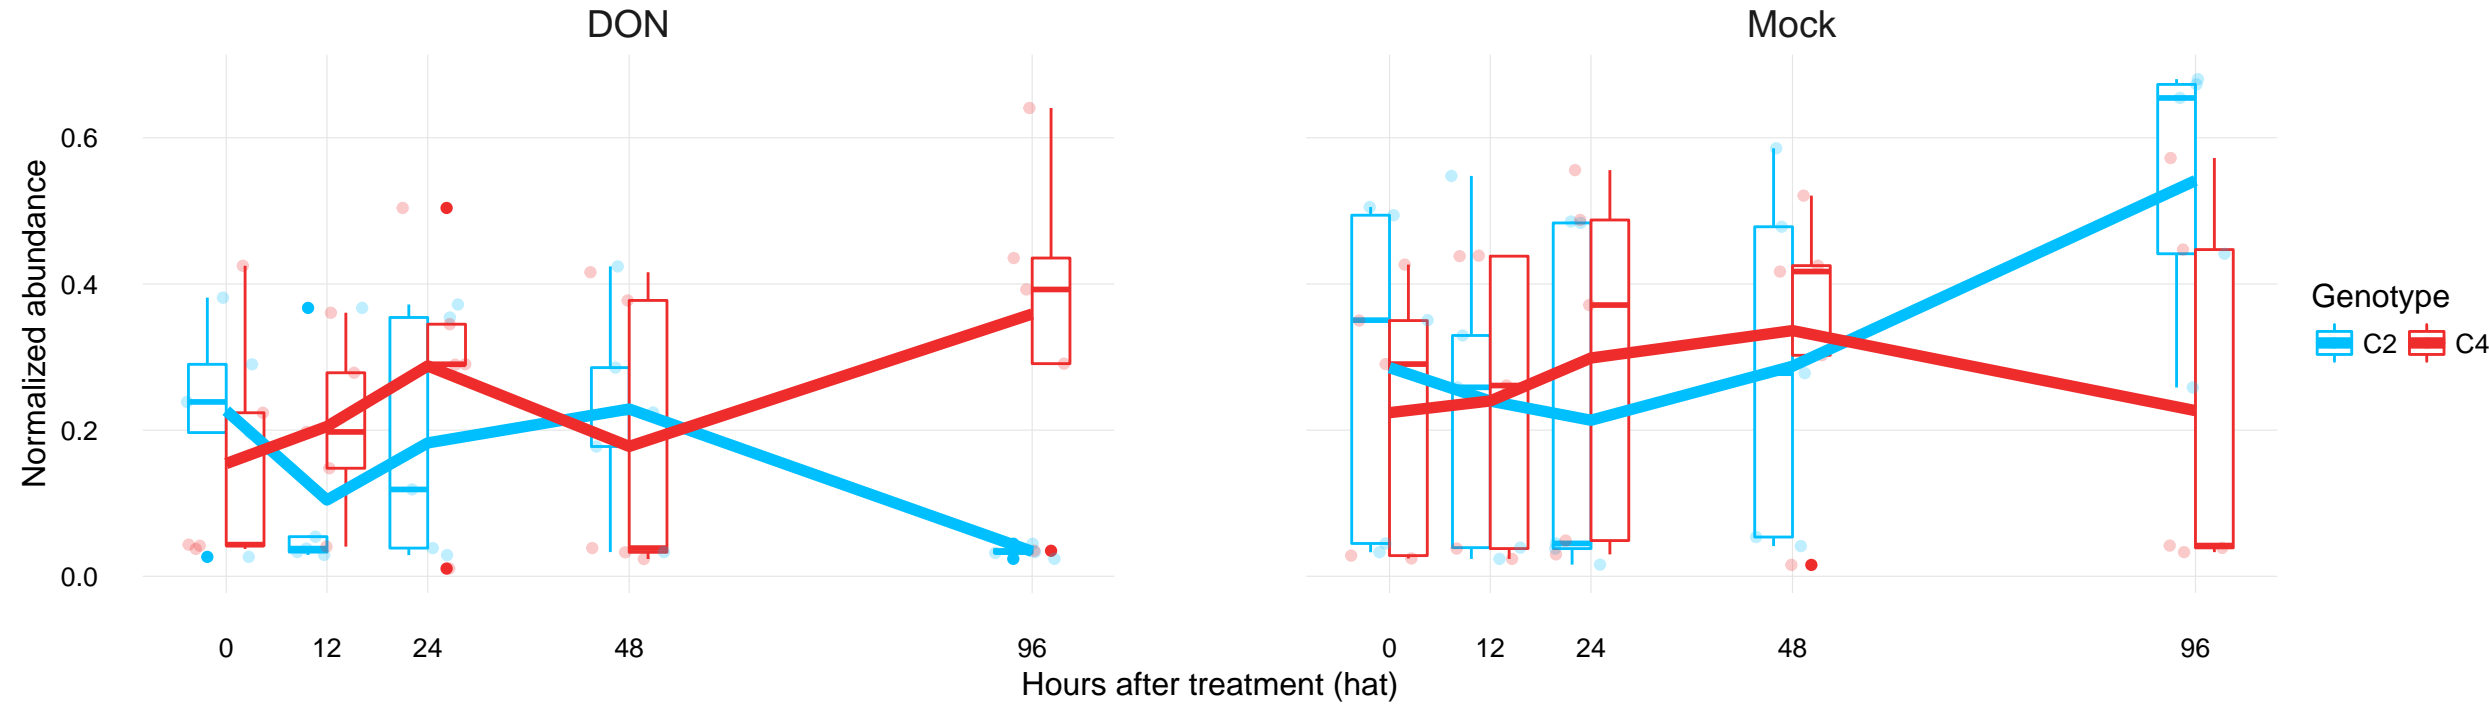

## CM, Remus; different treatments

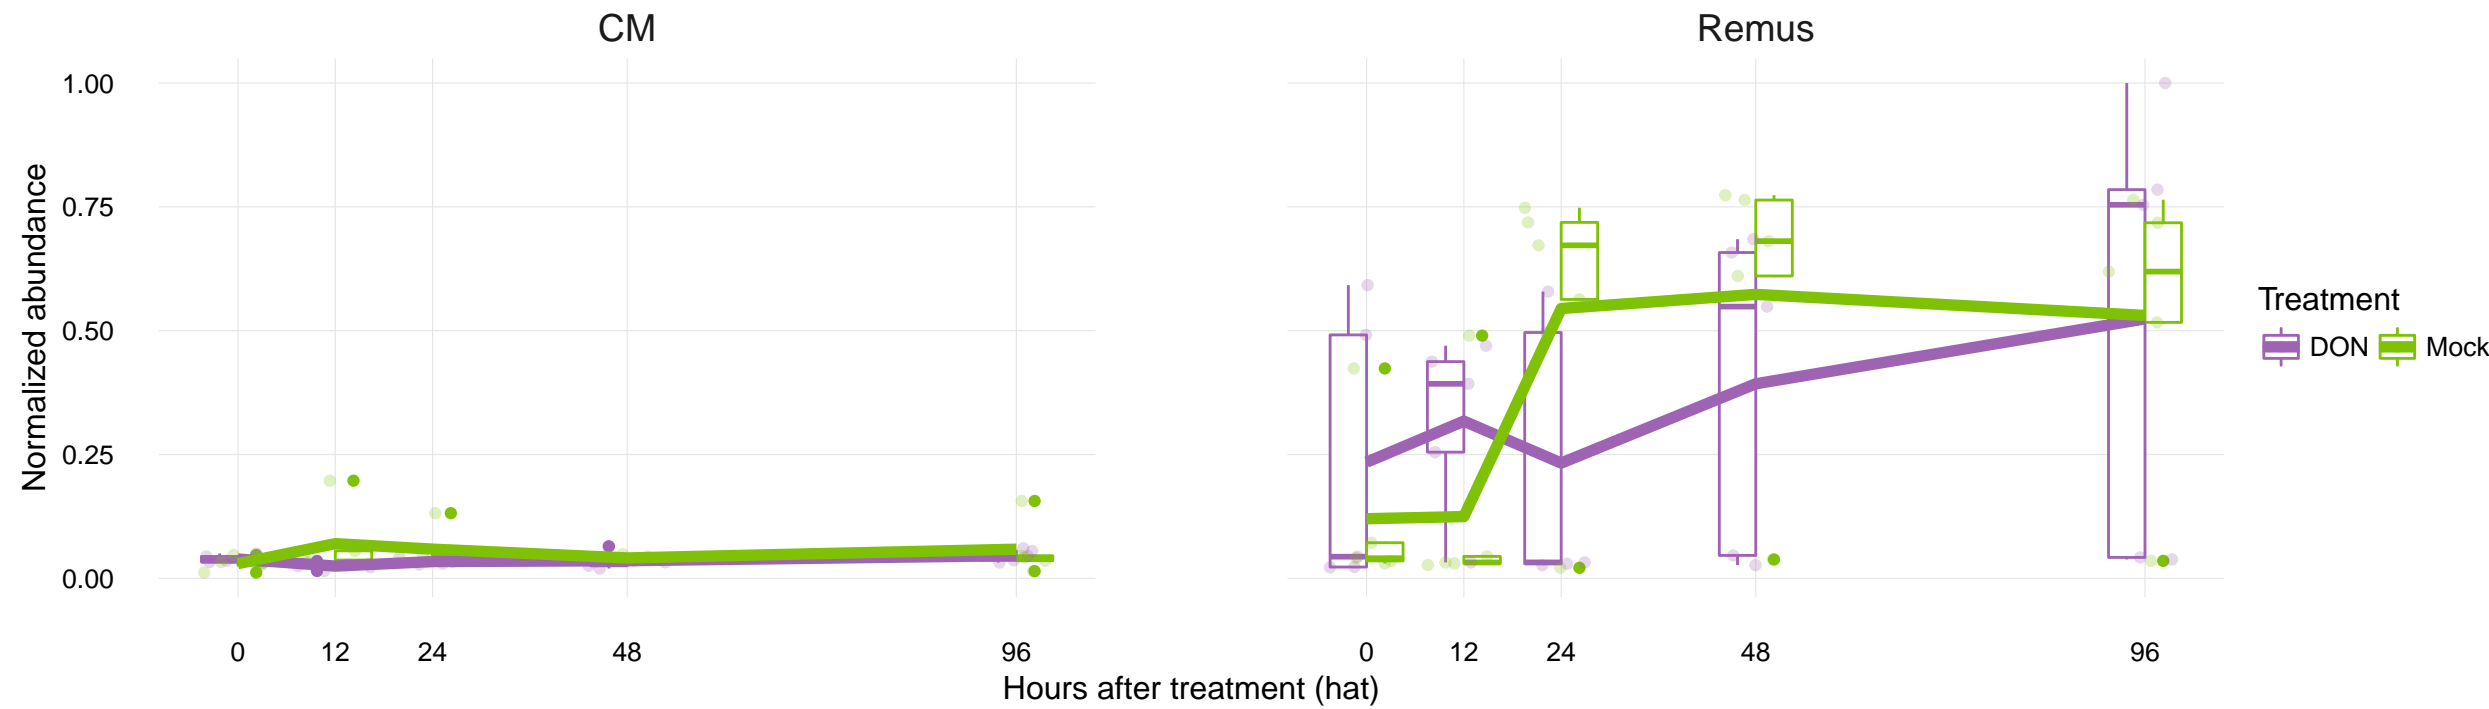

## DON, Mock; all four genotypes

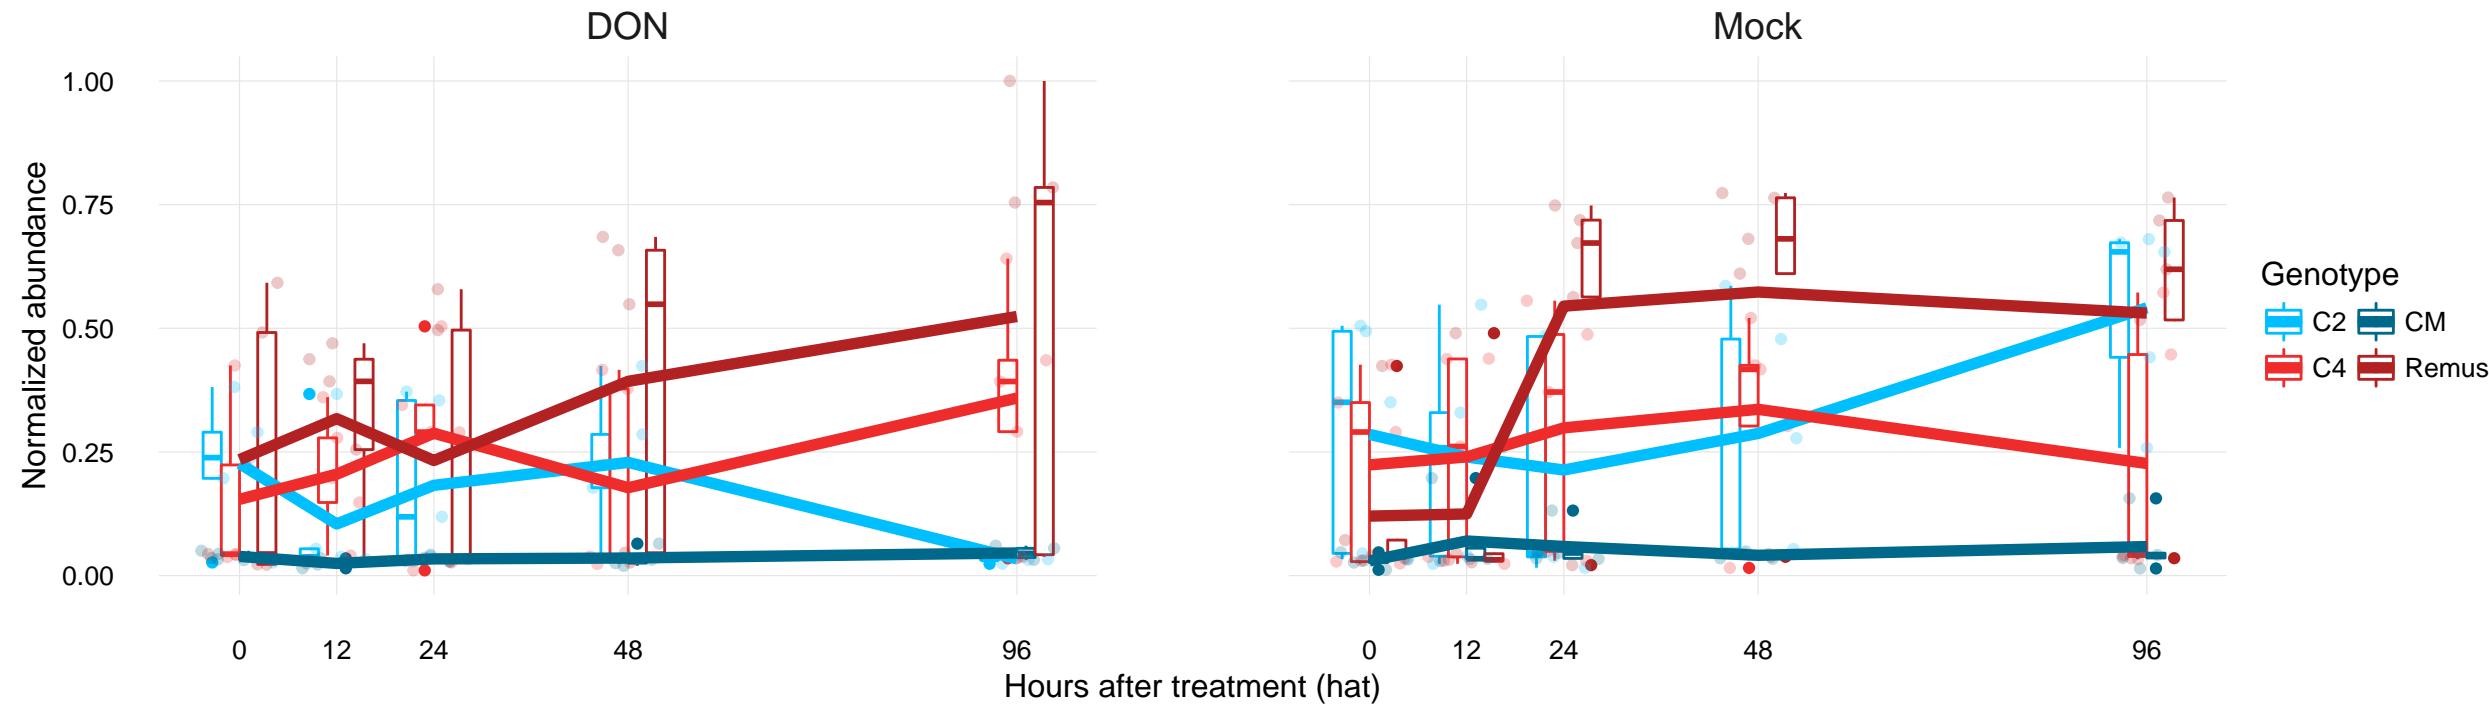

# U.18

Unknown Phe-derived wheat-metabolite

|                |                          |
|----------------|--------------------------|
| MZ             | 335.1674                 |
| RT             | 34.17 min                |
| Normalization  | Directly via KPX samples |
| Cluster        | –                        |
| Cn total / Phe | 16 / 16                  |

## C2, C4; different treatments

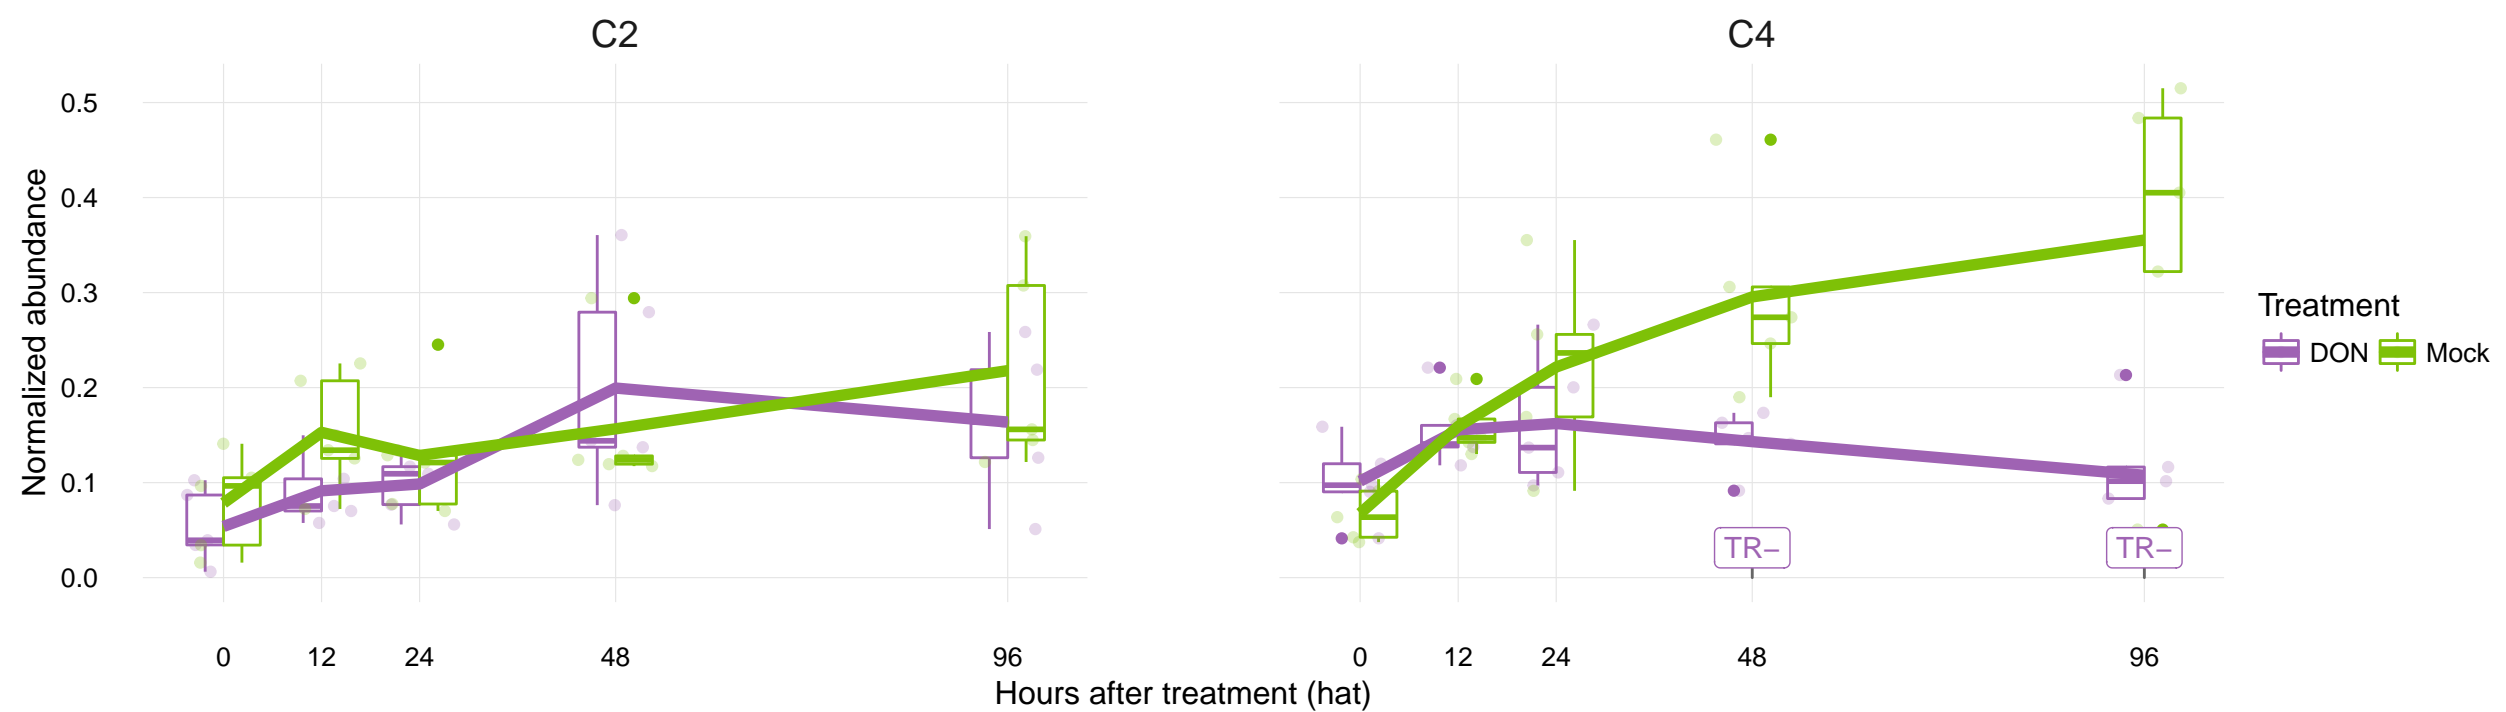

## DON, Mock; different genotypes

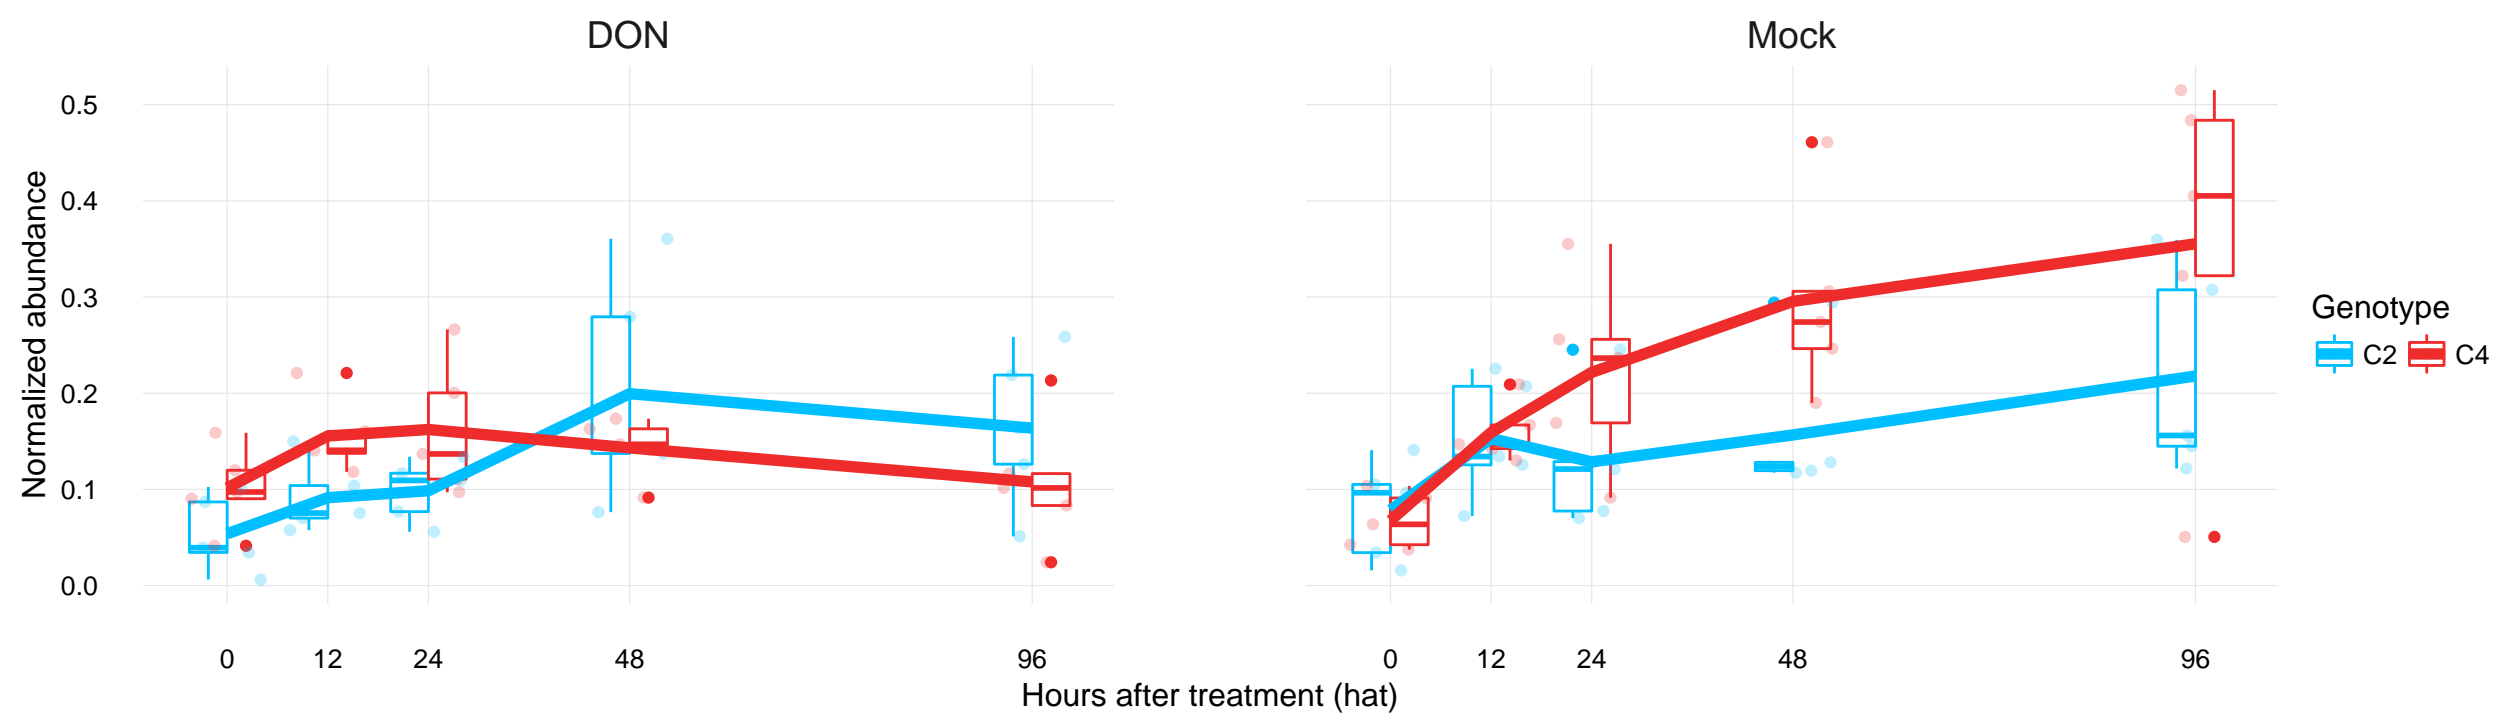

## CM, Remus; different treatments

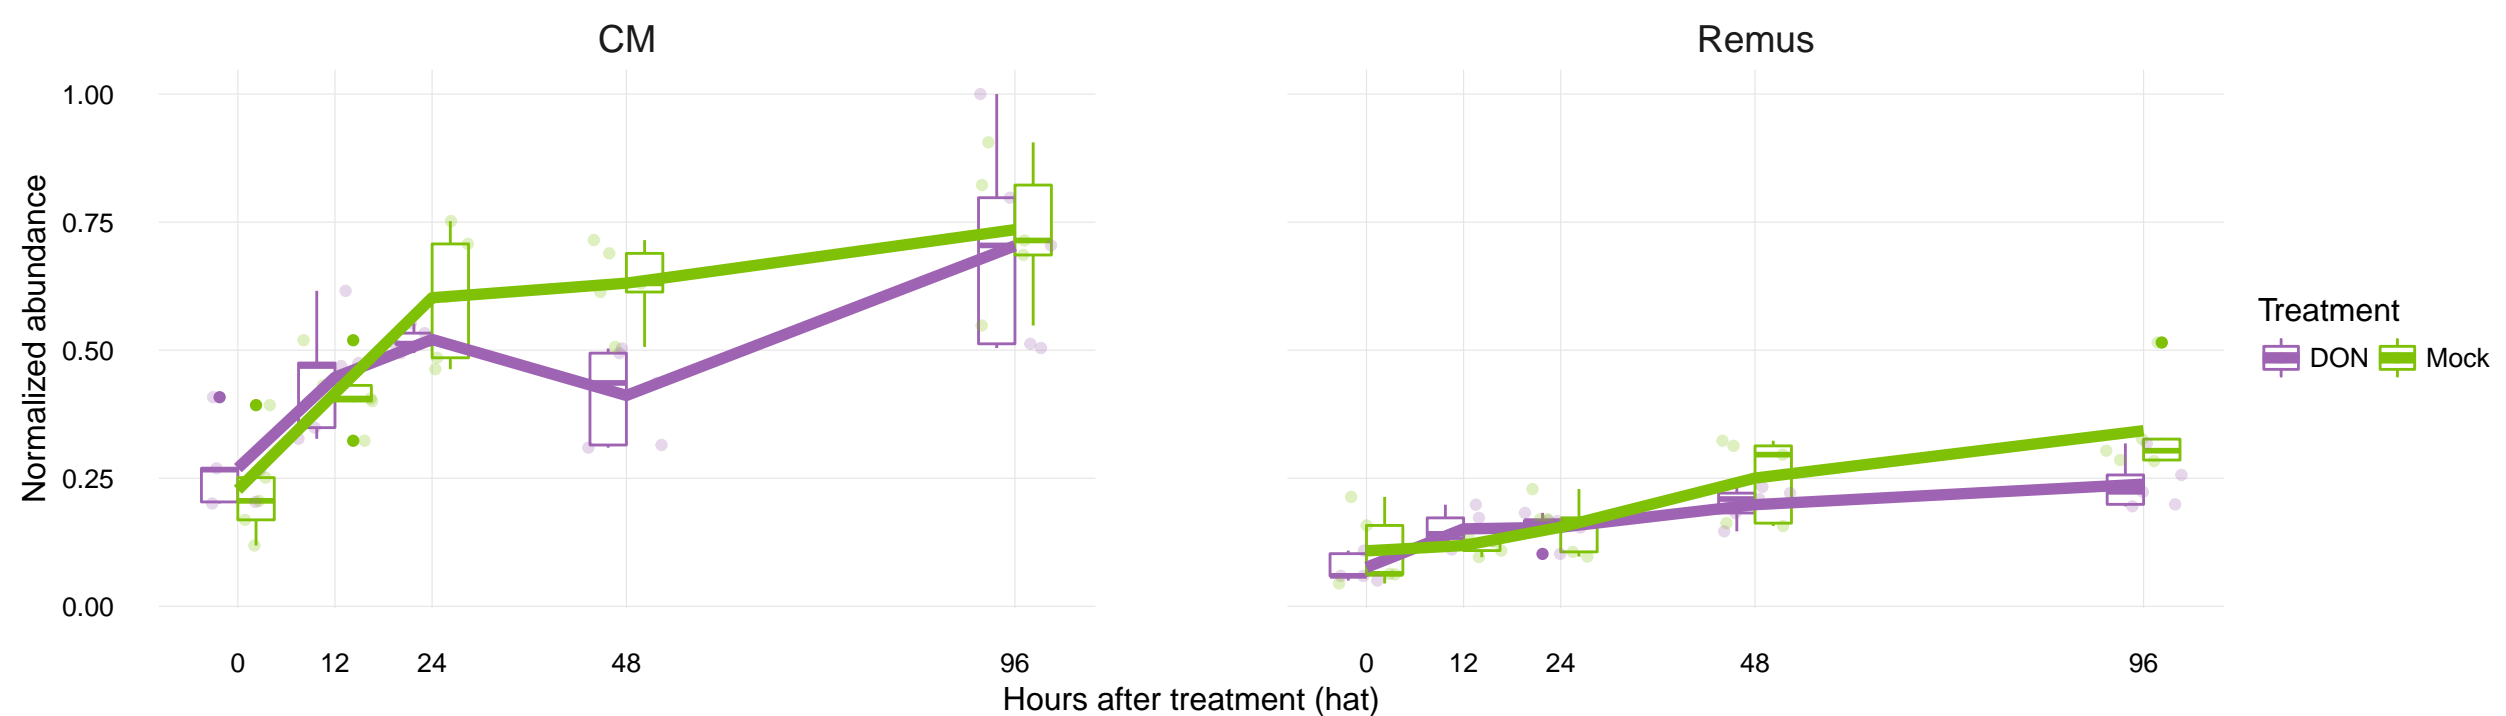

## DON, Mock; all four genotypes

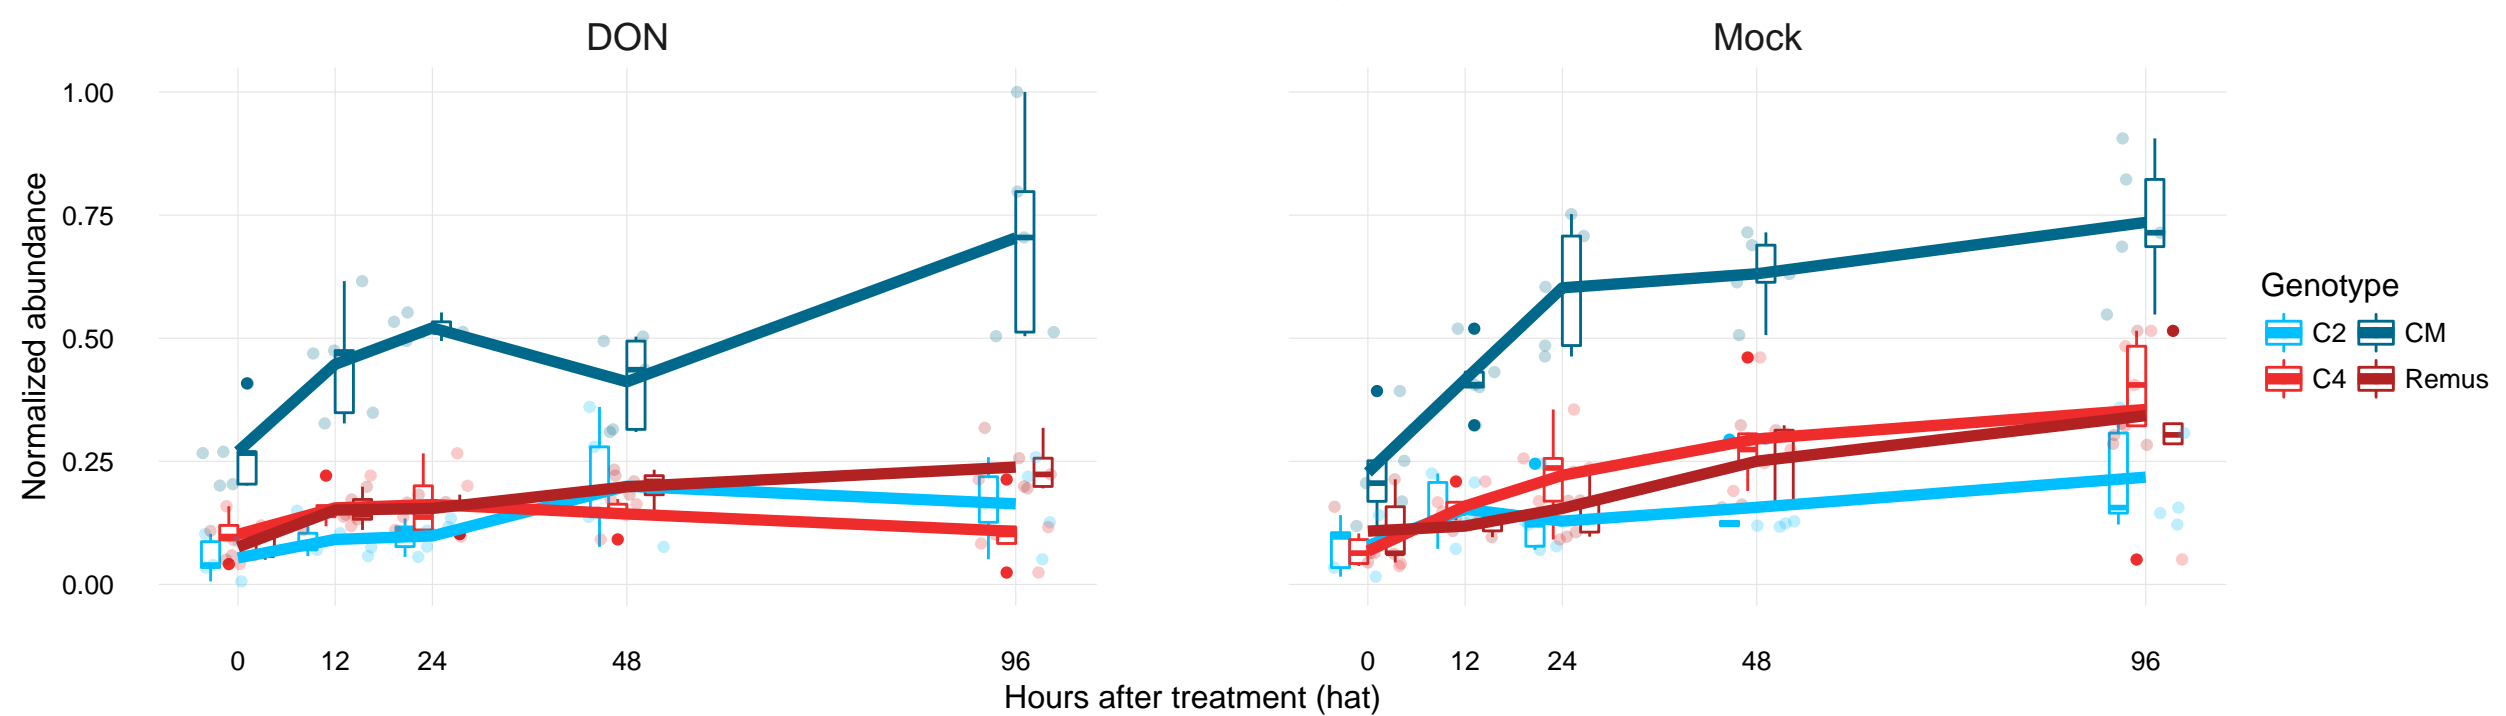

# A.141

Annotated as HCA derivative  
(1 database hit)

|                |                          |
|----------------|--------------------------|
| MZ             | 317.1726                 |
| RT             | 27.78 min                |
| Normalization  | Directly via KPX samples |
| Cluster        | –                        |
| Cn total / Phe | 17 /                     |

## C2, C4; different treatments

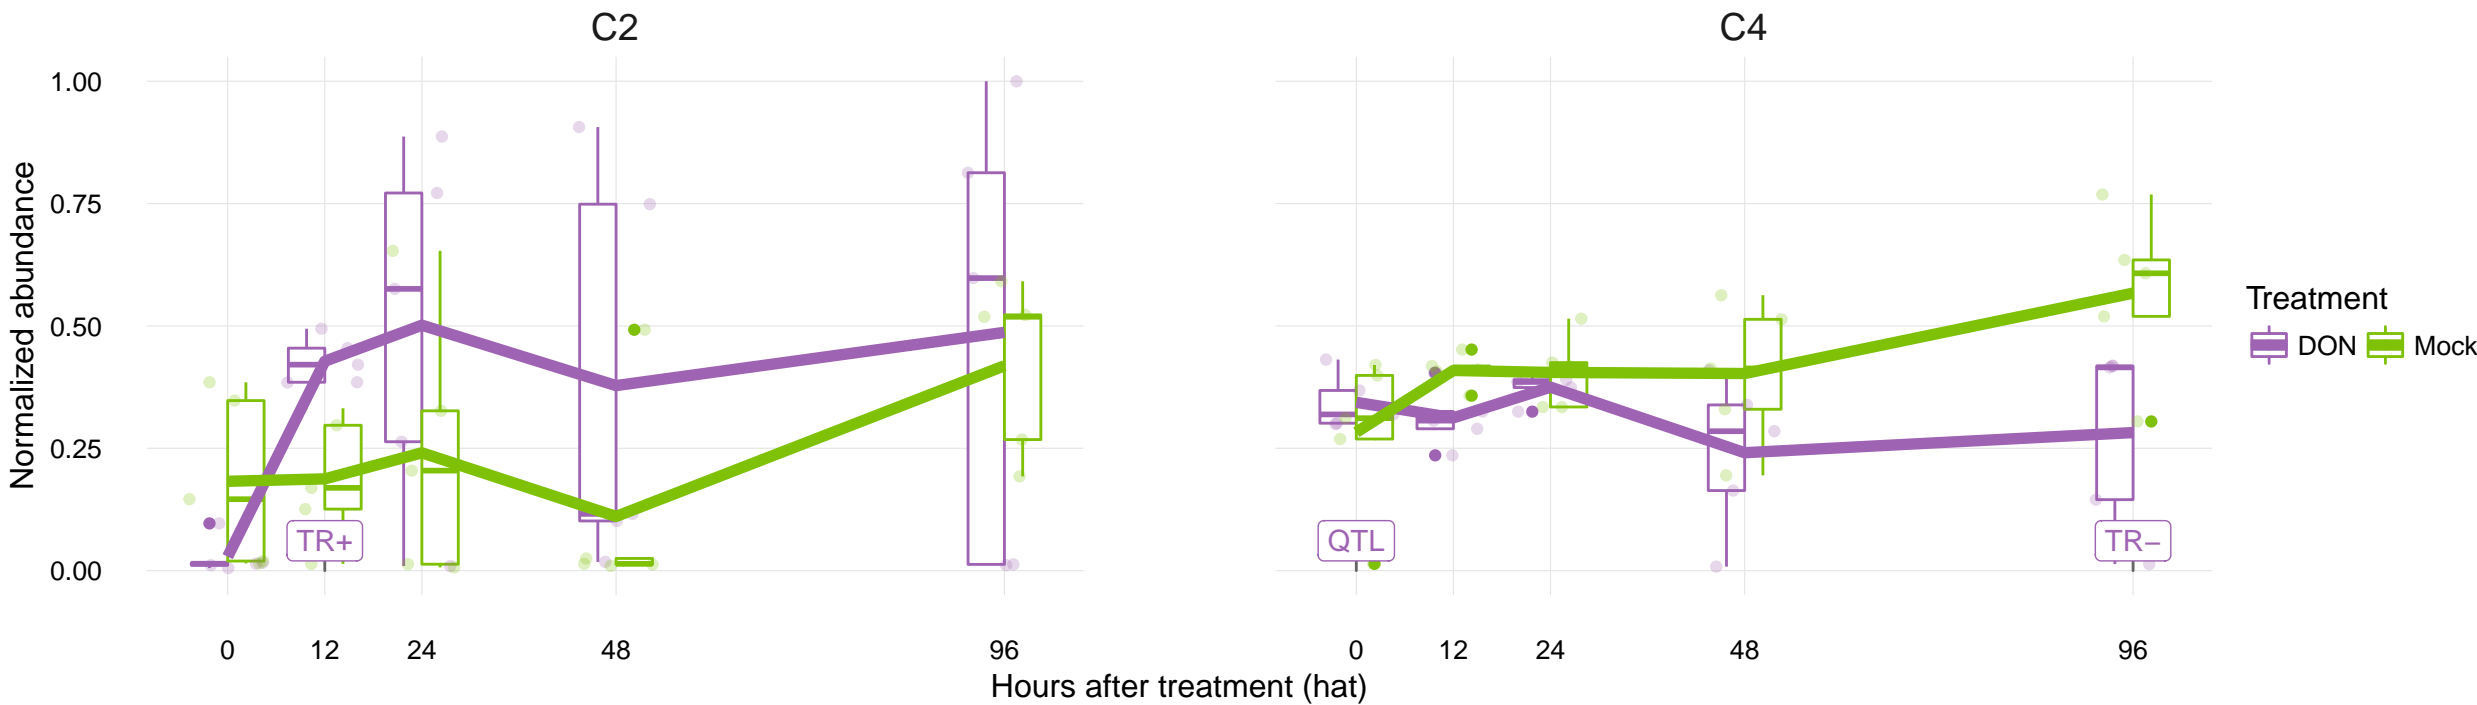

## DON, Mock; different genotypes

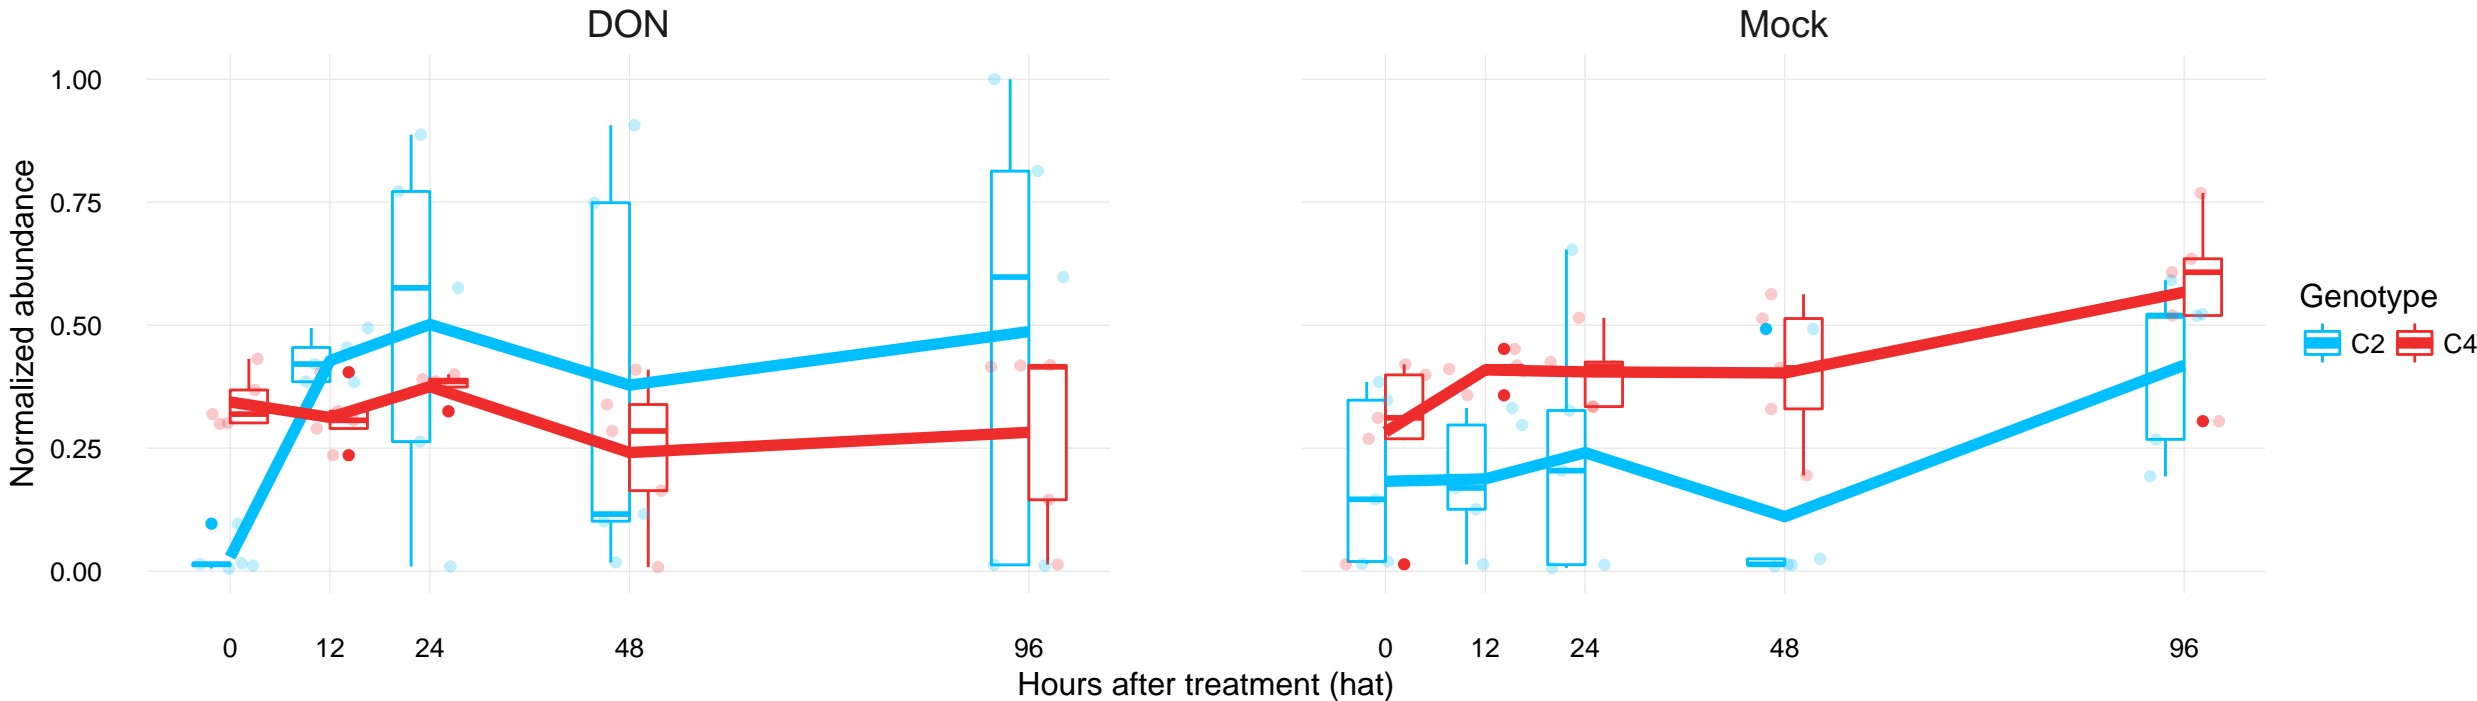

## CM, Remus; different treatments

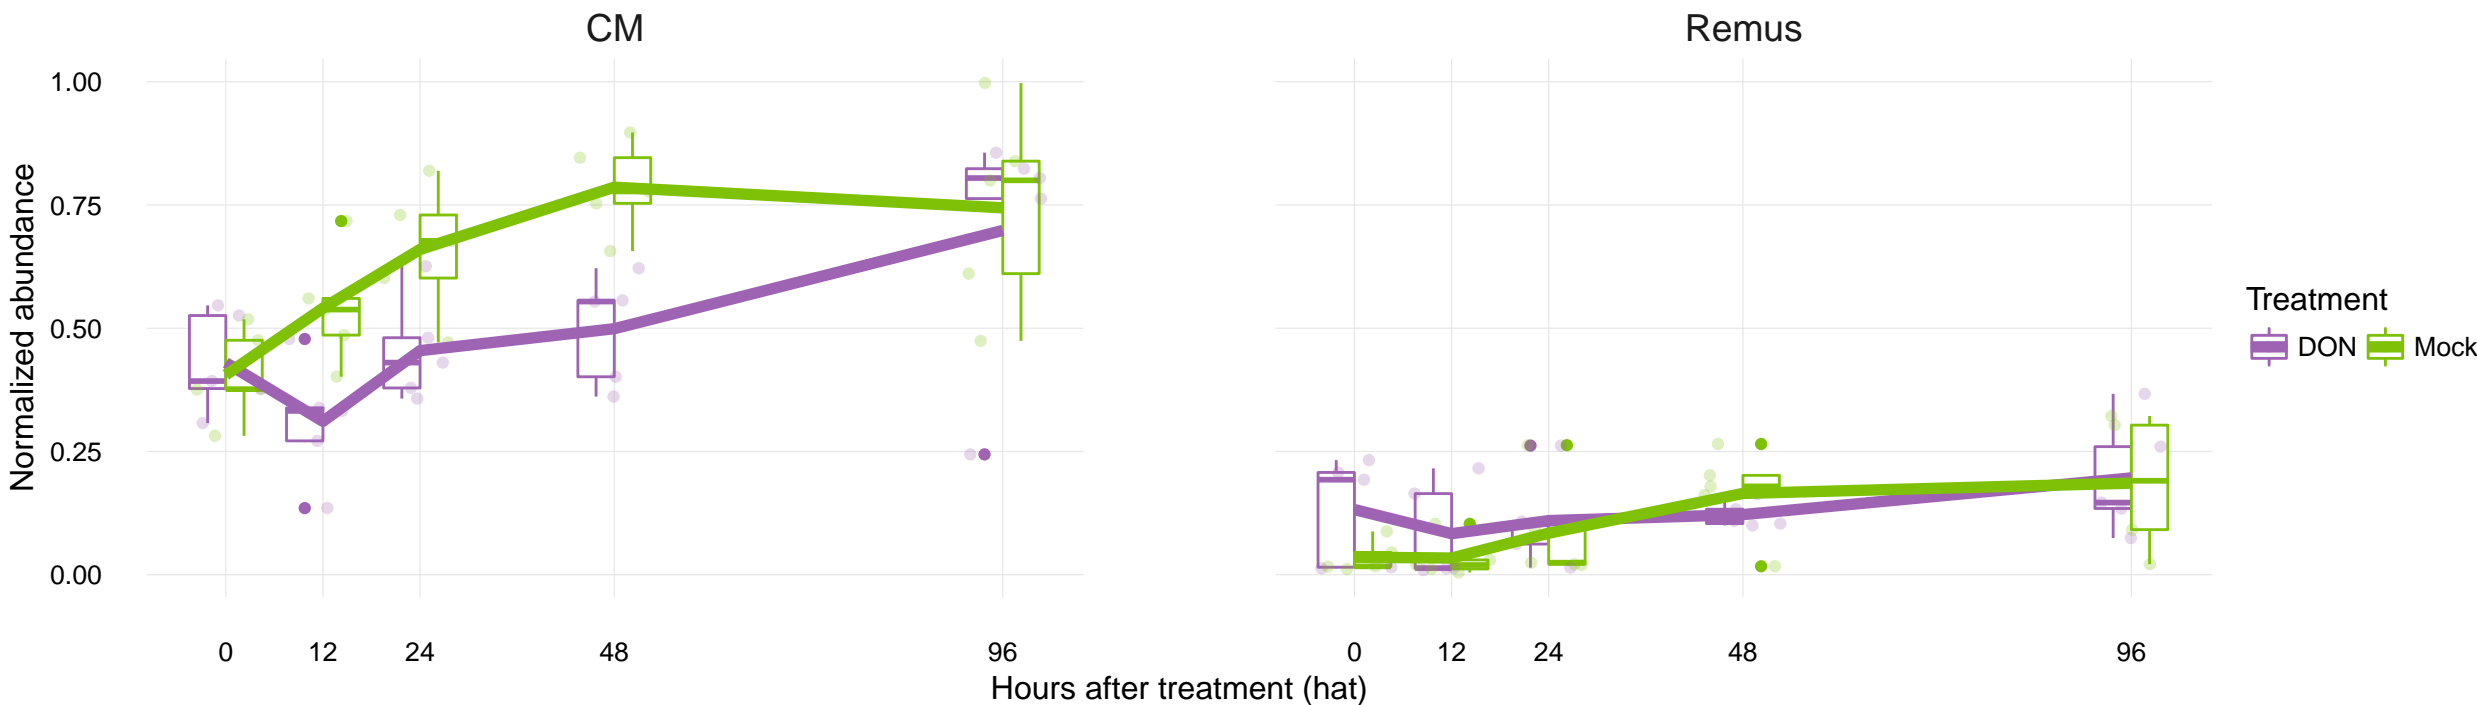

## DON, Mock; all four genotypes

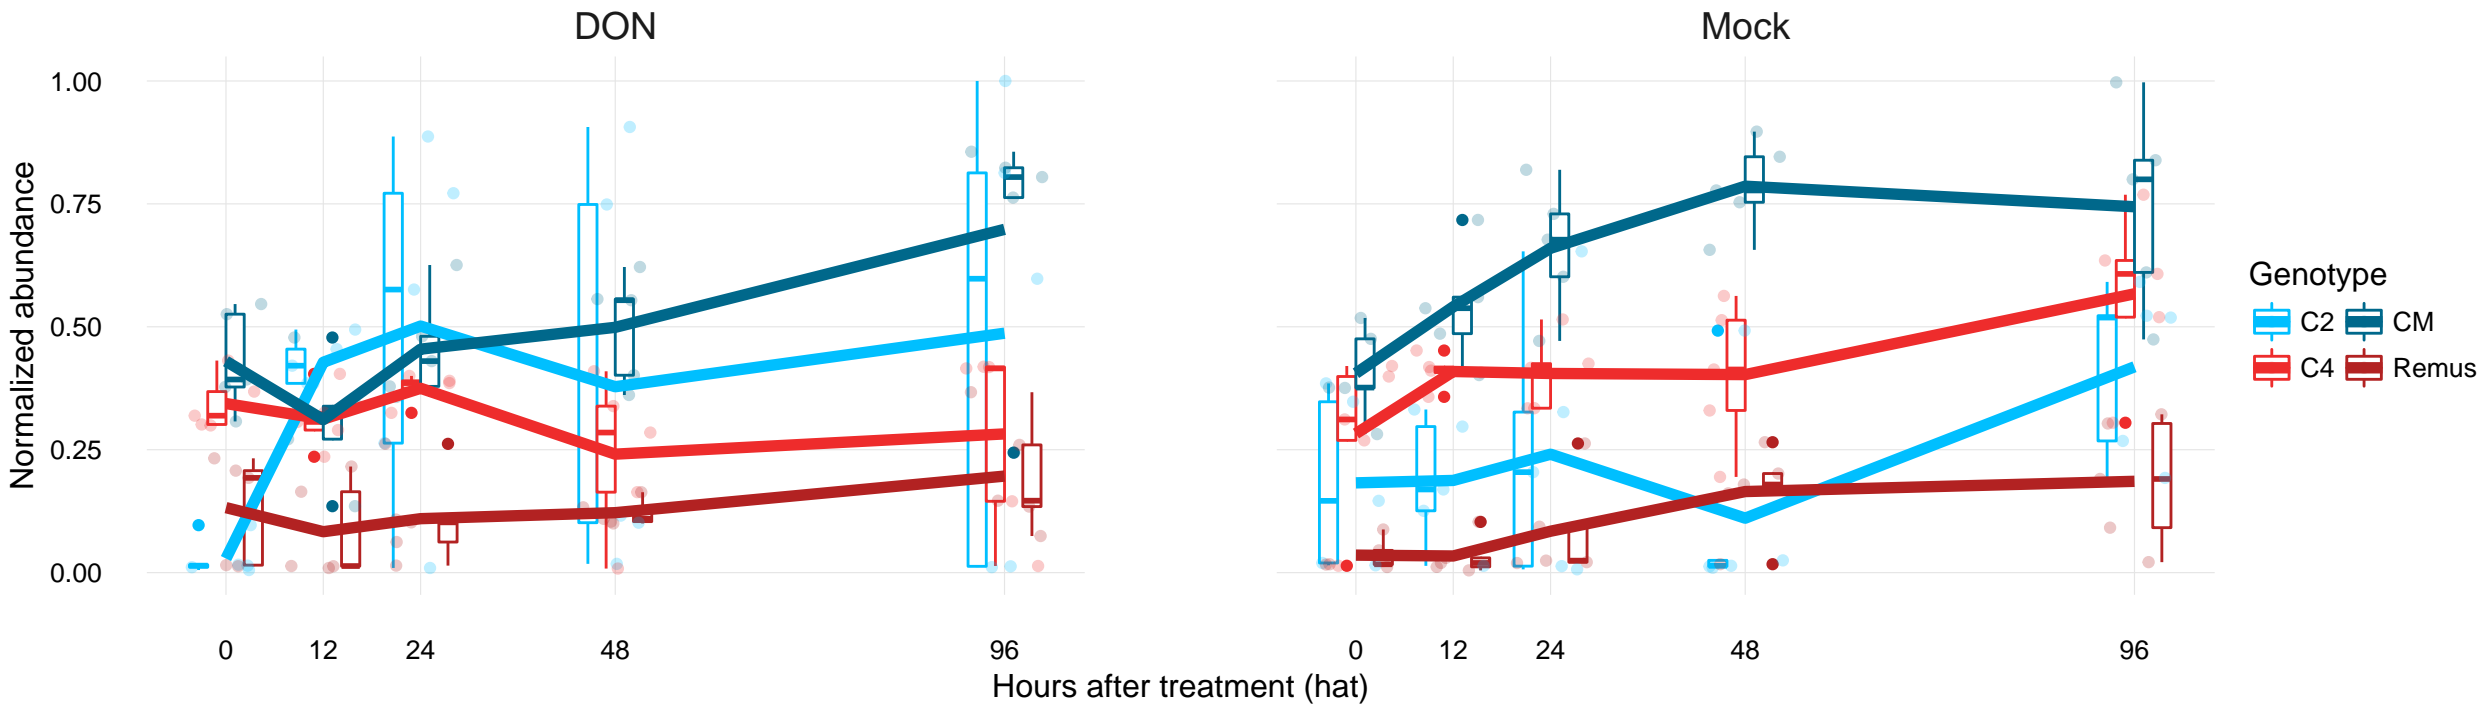



# U.17

Unknown Phe-derived wheat-metabolite

|                |                |
|----------------|----------------|
| MZ             | 541.3291       |
| RT             | 33.09 min      |
| Normalization  | Not normalized |
| Cluster        | –              |
| Cn total / Phe | 8 / 8          |

## C2, C4; different treatments

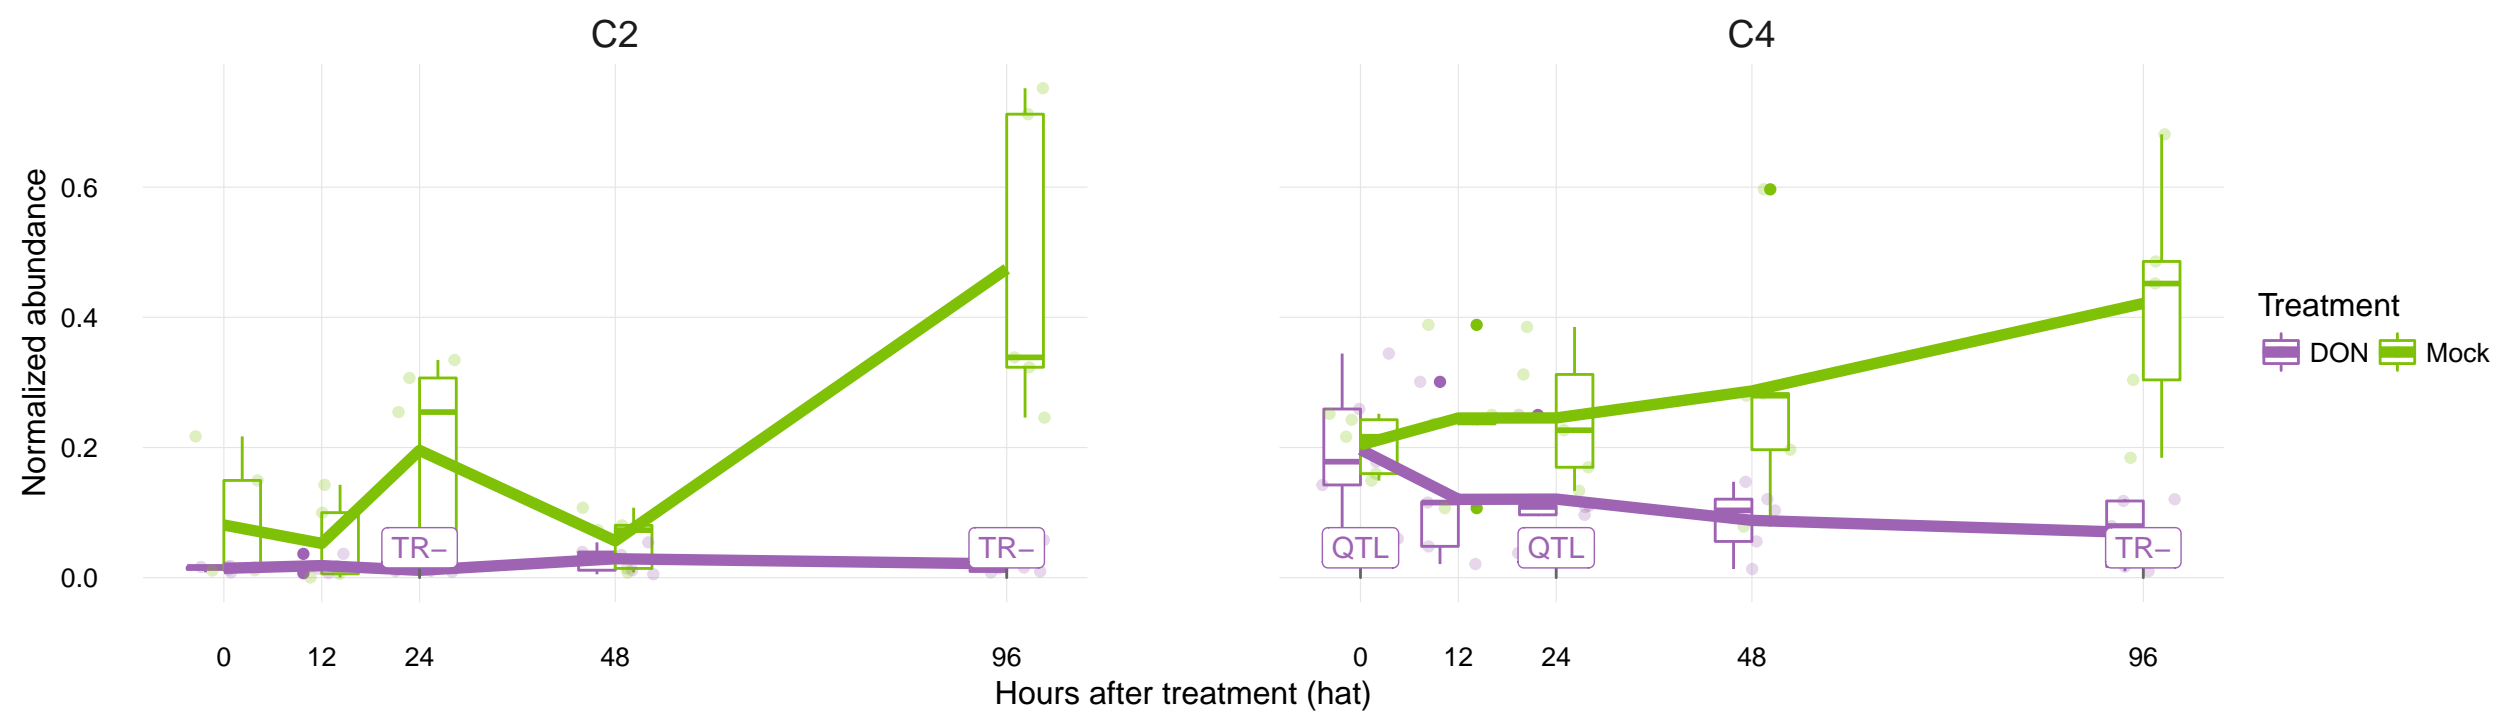

## DON, Mock; different genotypes

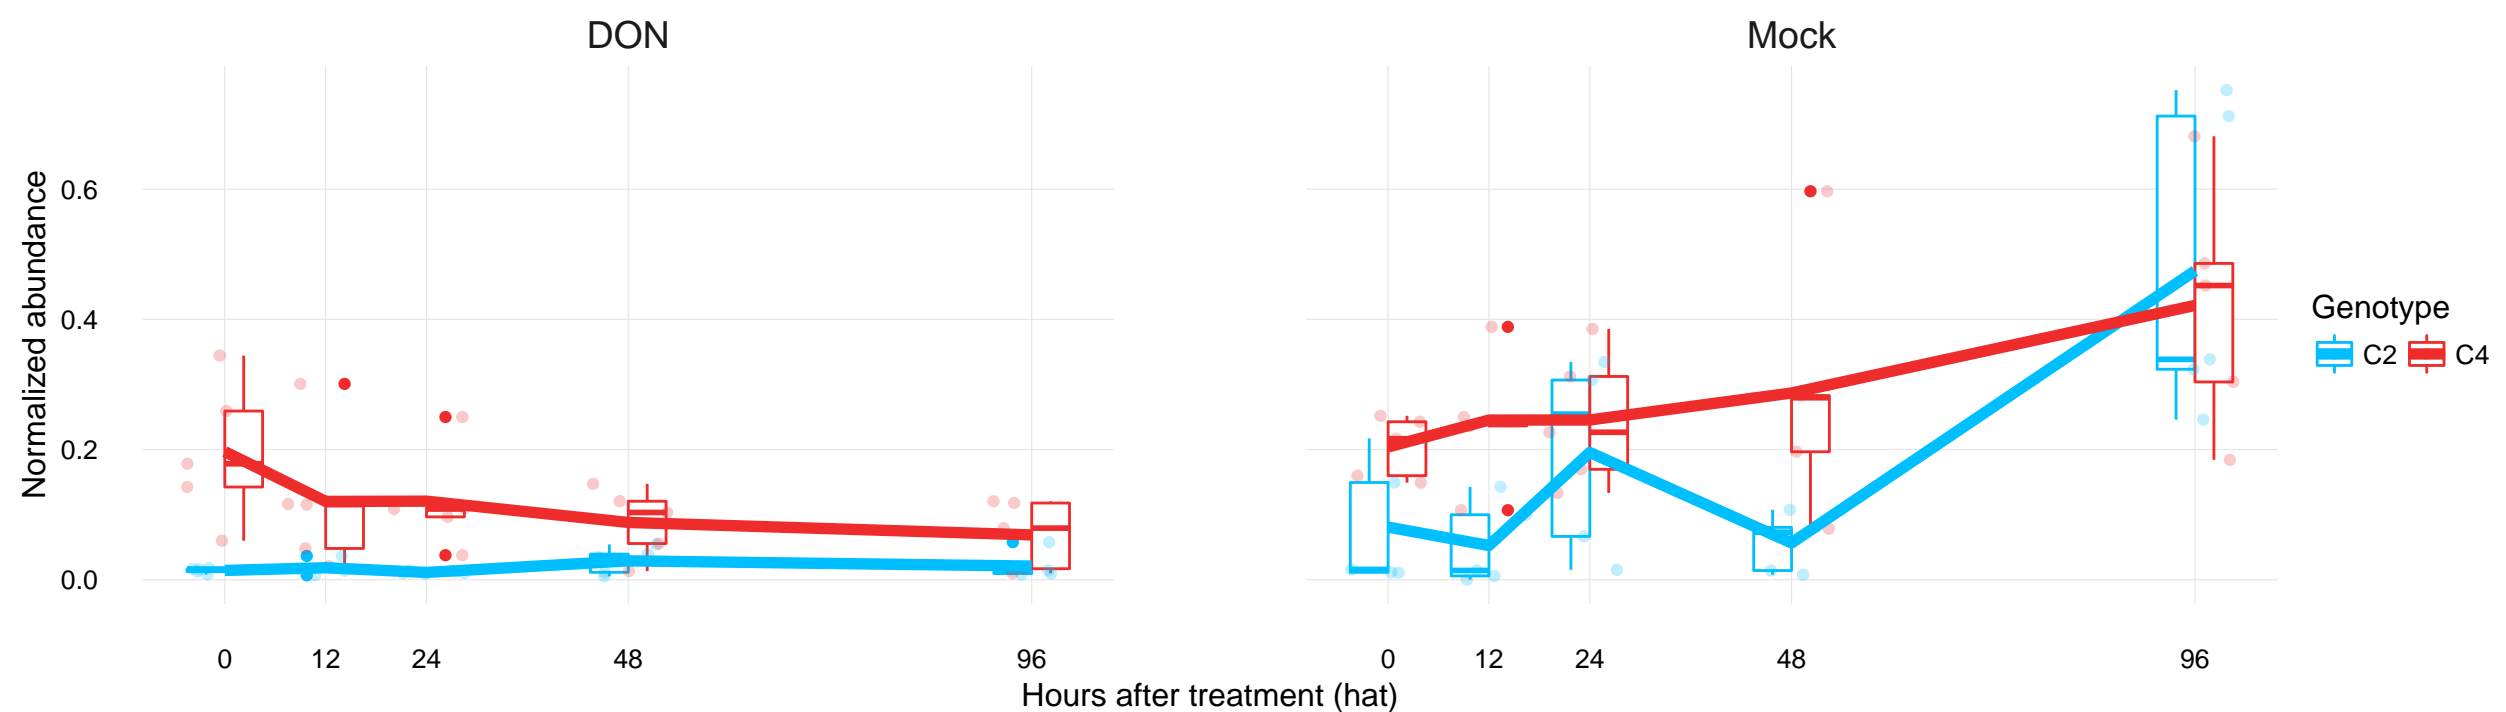

## CM, Remus; different treatments

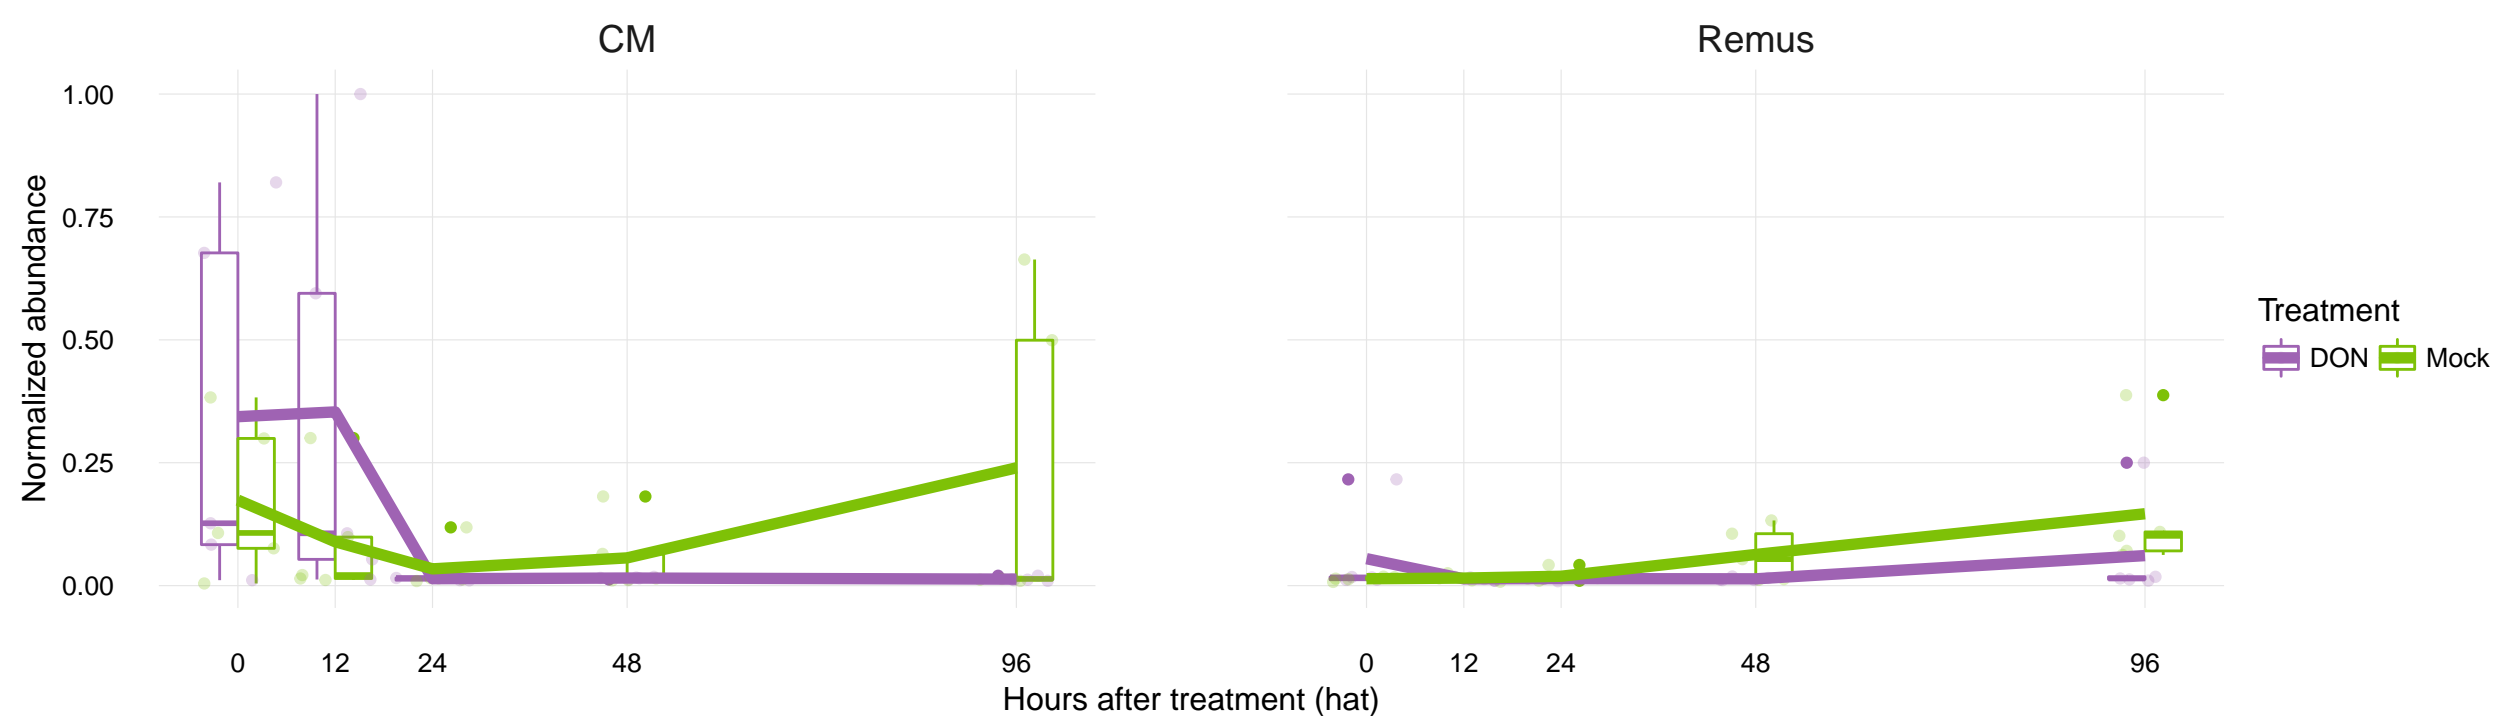

## DON, Mock; all four genotypes

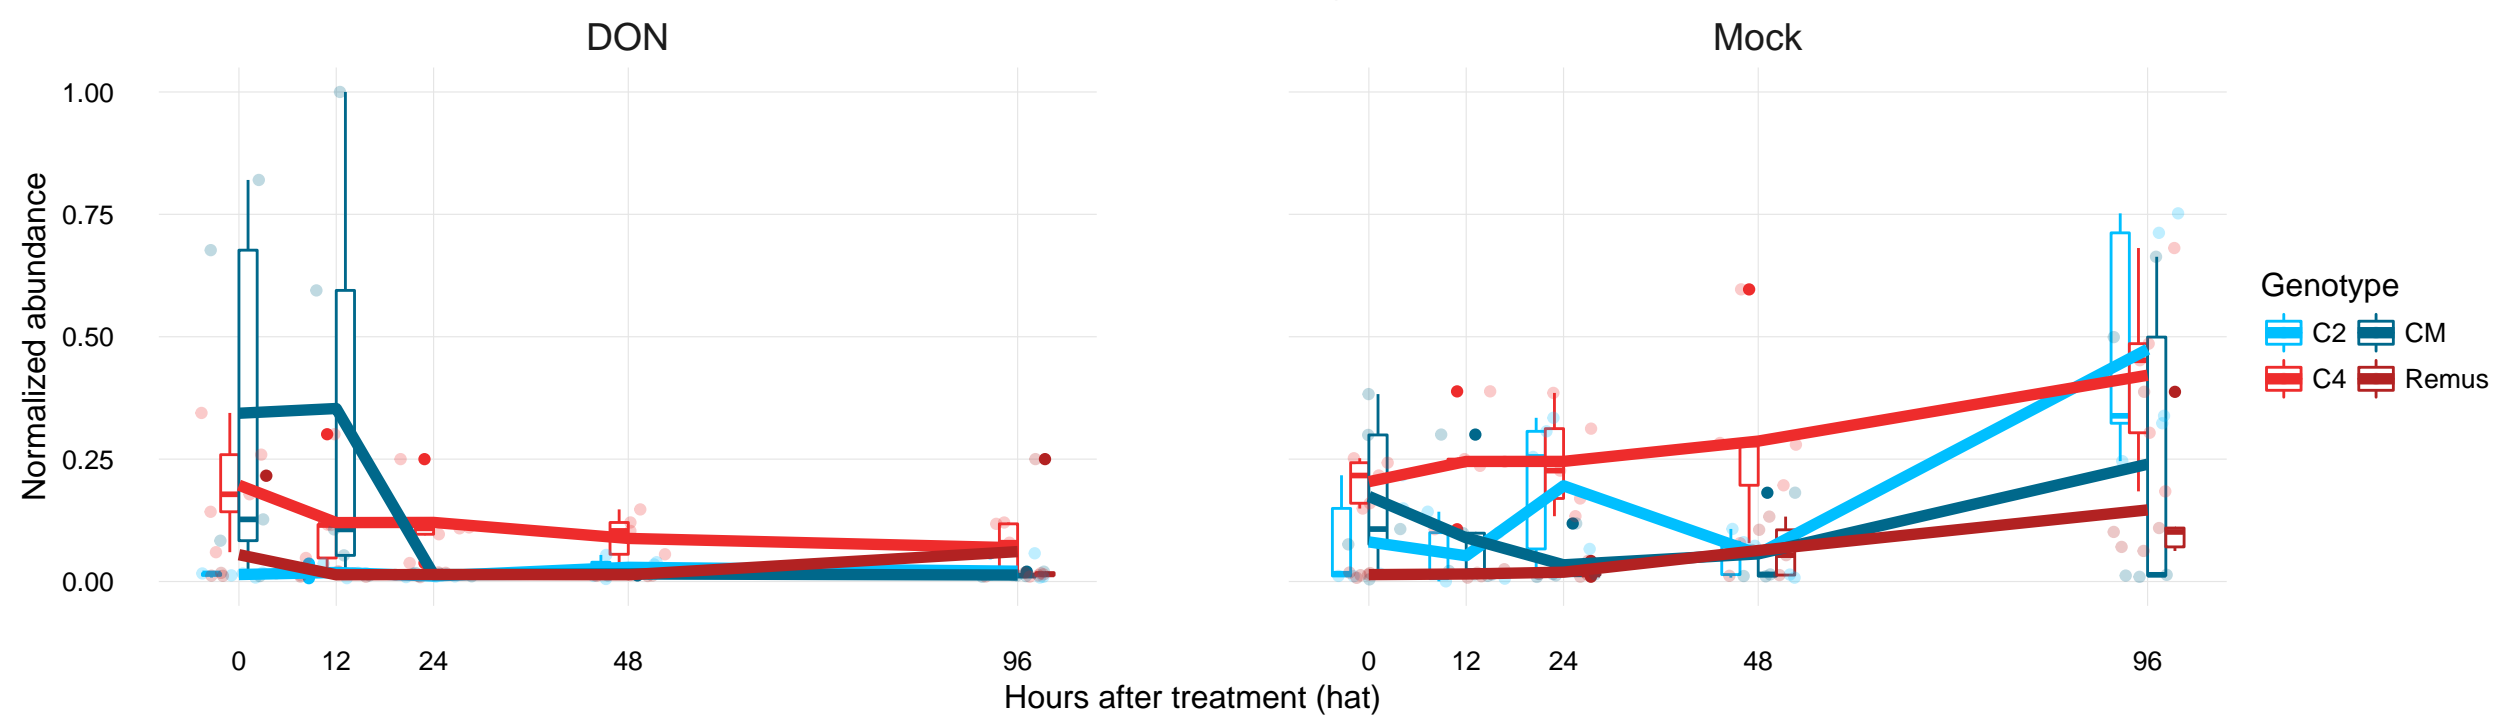



# U.16

Unknown Phe-derived wheat-metabolite

|                |                |
|----------------|----------------|
| MZ             | 798.9801       |
| RT             | 31.92 min      |
| Normalization  | Not normalized |
| Cluster        | –              |
| Cn total / Phe | 6 / 6          |

## C2, C4; different treatments

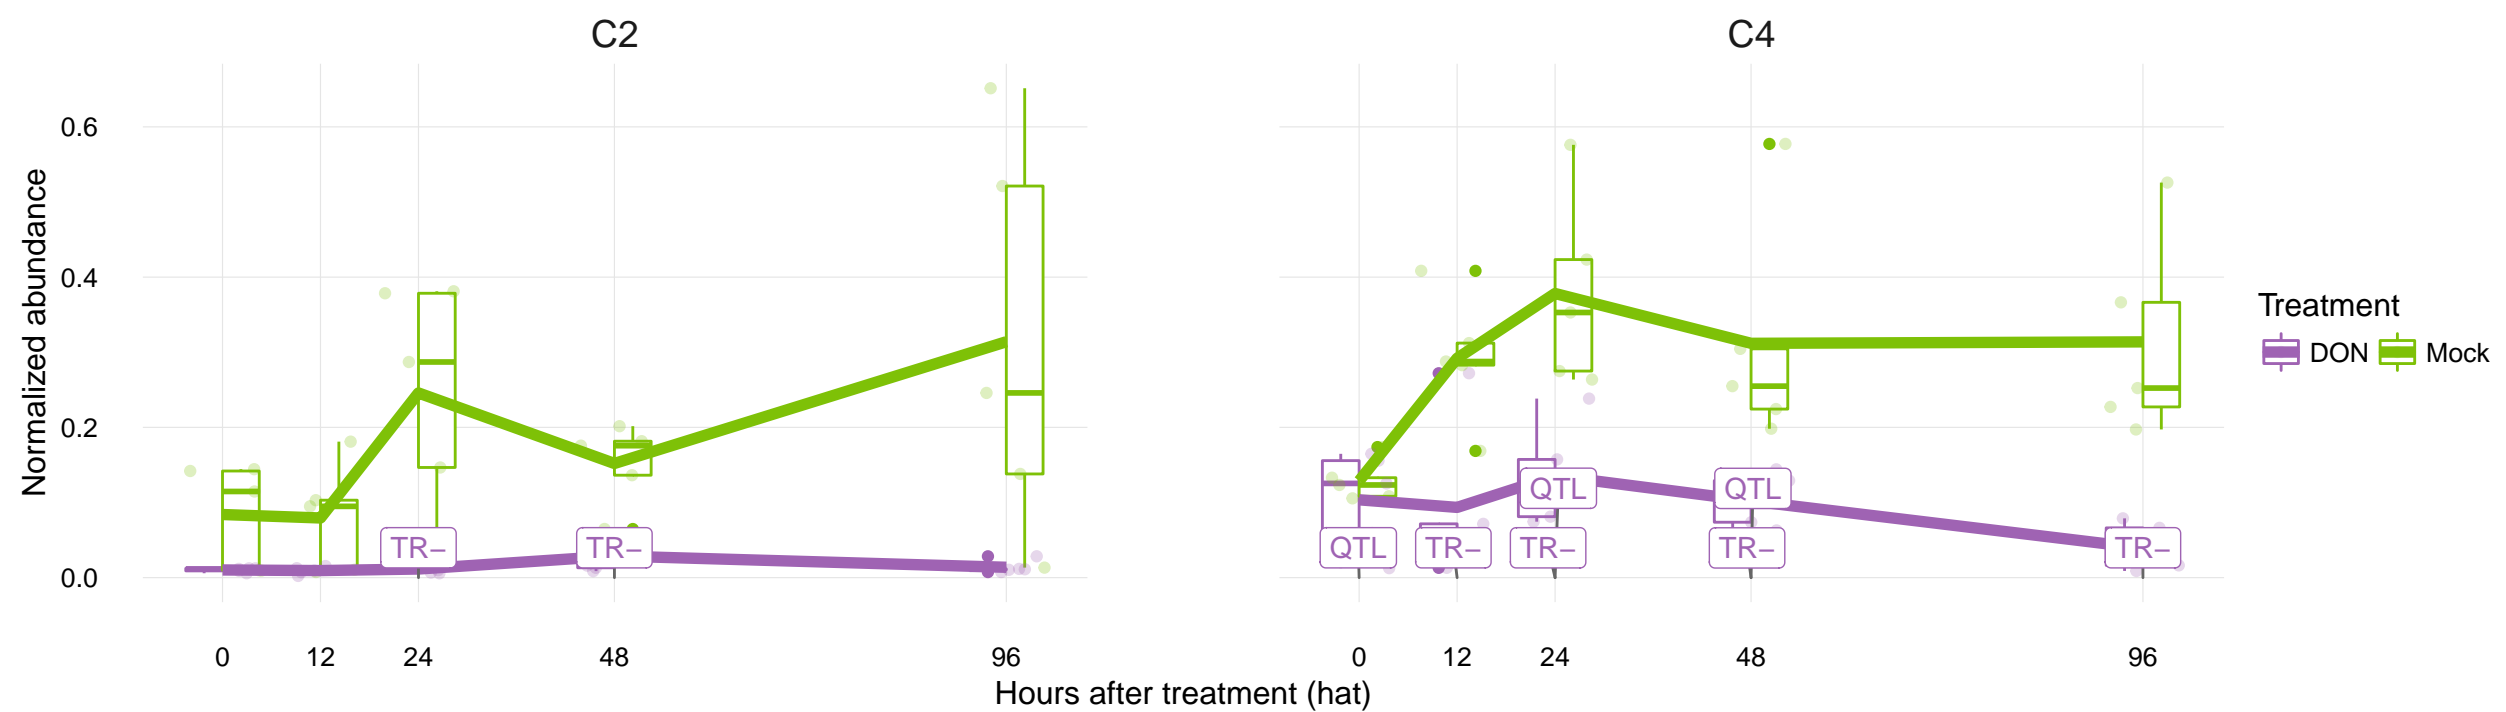

## DON, Mock; different genotypes

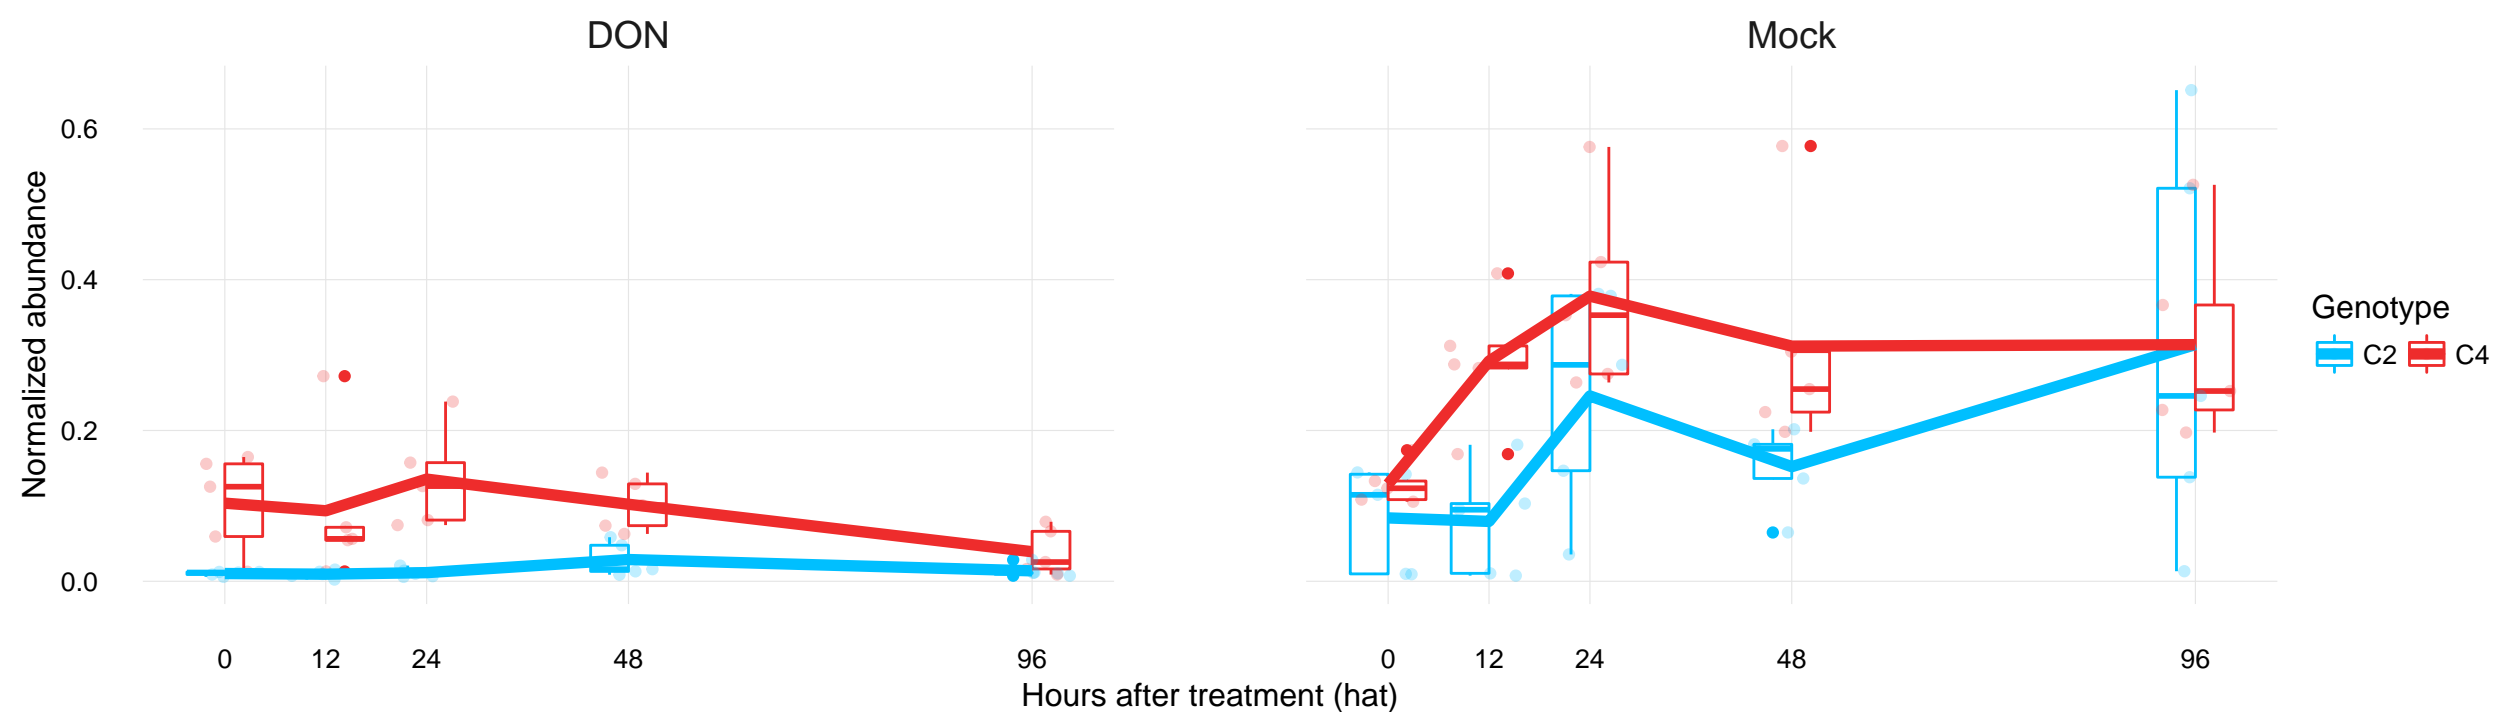

## CM, Remus; different treatments

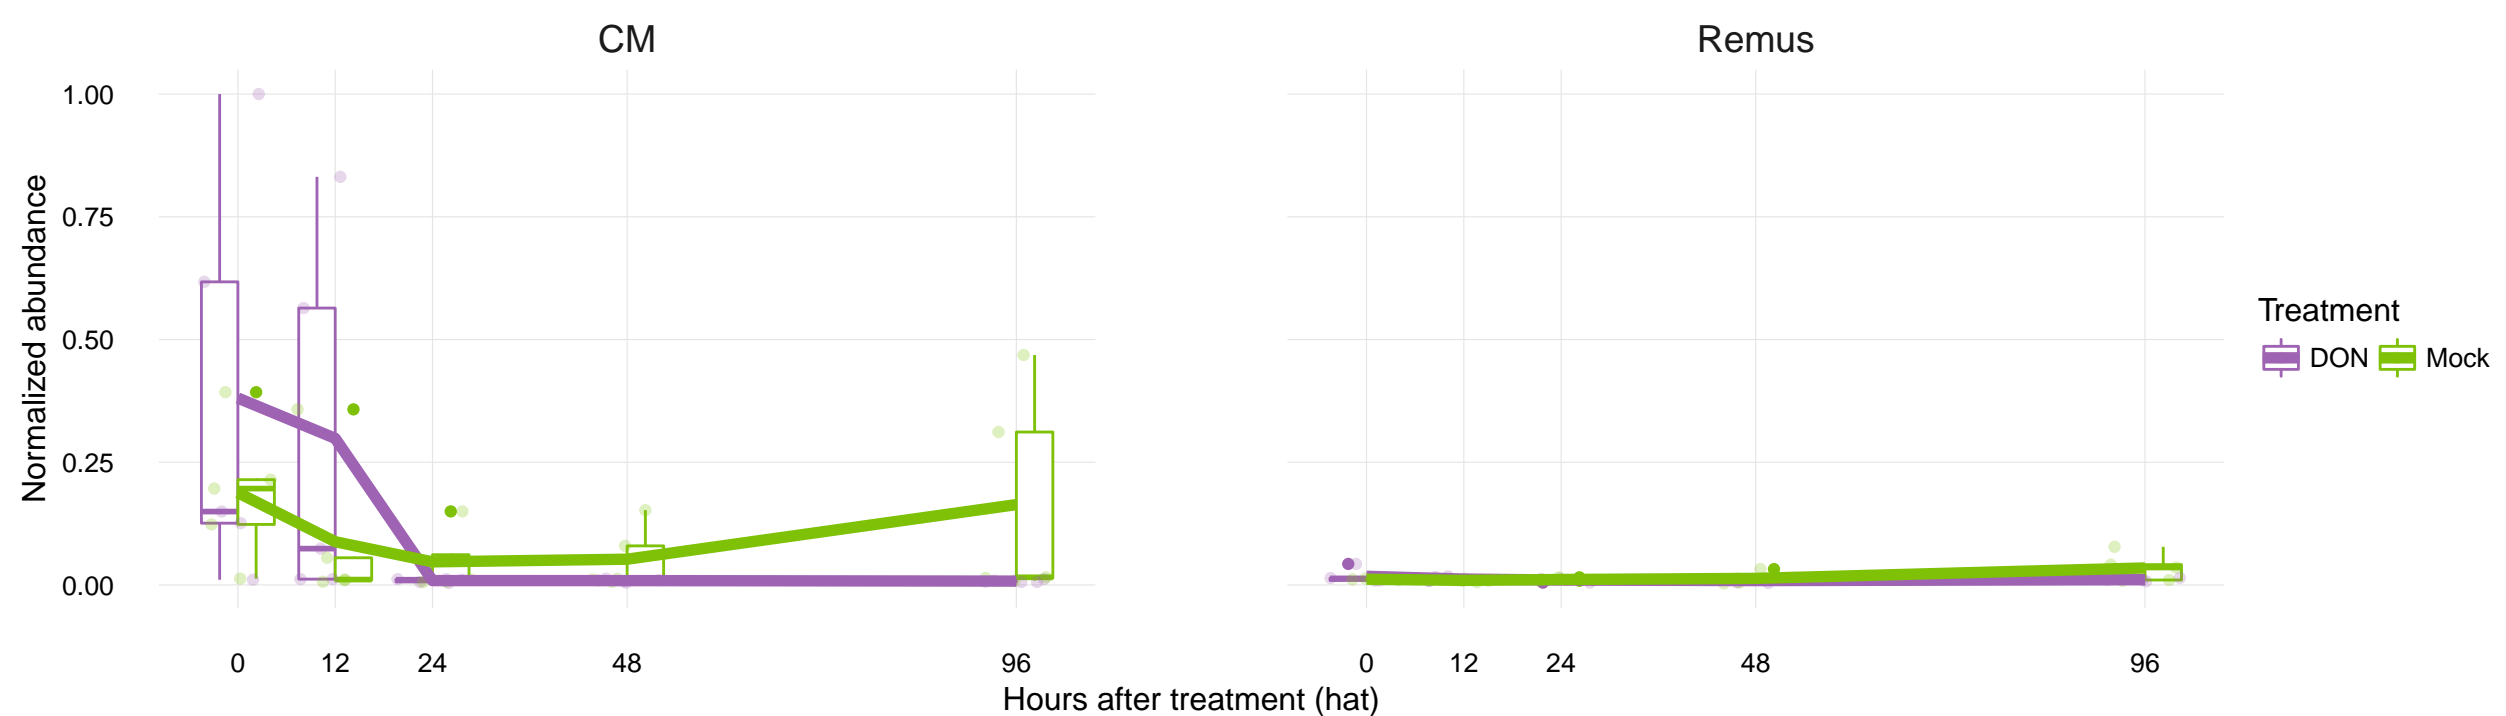

## DON, Mock; all four genotypes

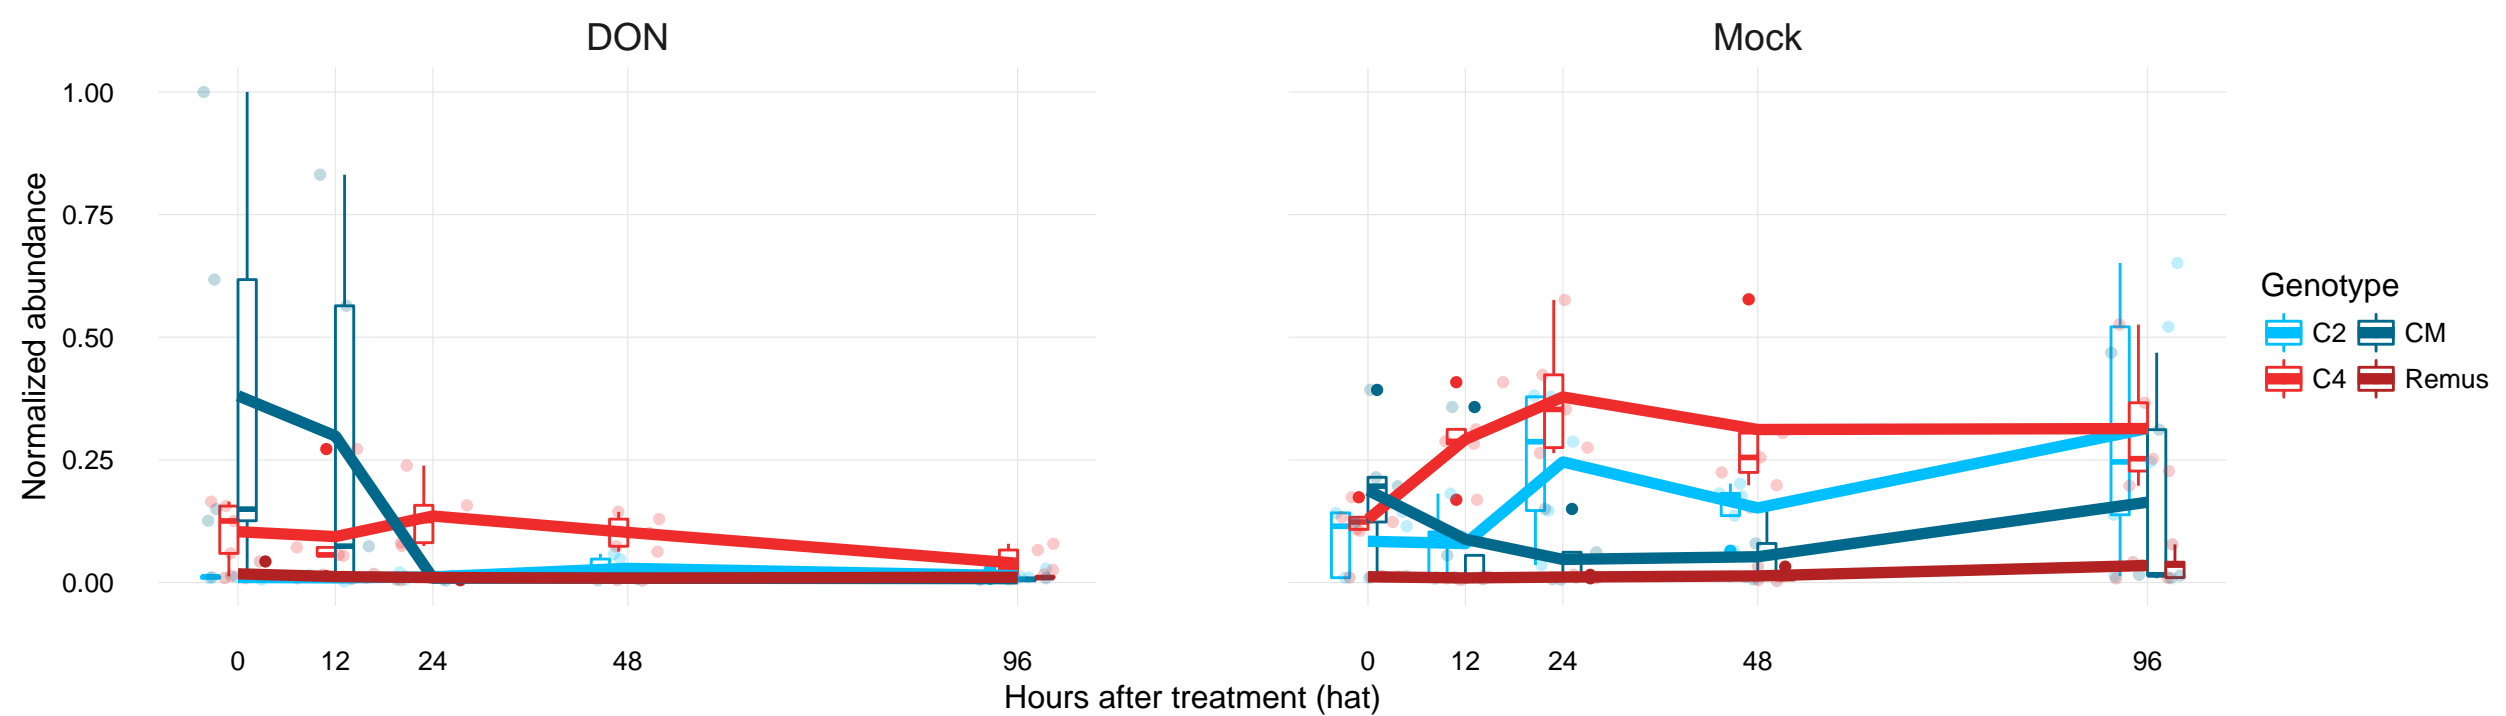

# A.9

Annotated as Putative phenylacetic acid derivative  
(1 database hit)

|                |                |
|----------------|----------------|
| MZ             | 105.0698       |
| RT             | 5.43 min       |
| Normalization  | Not normalized |
| Cluster        | –              |
| Cn total / Phe | 8 / 8          |

## C2, C4; different treatments

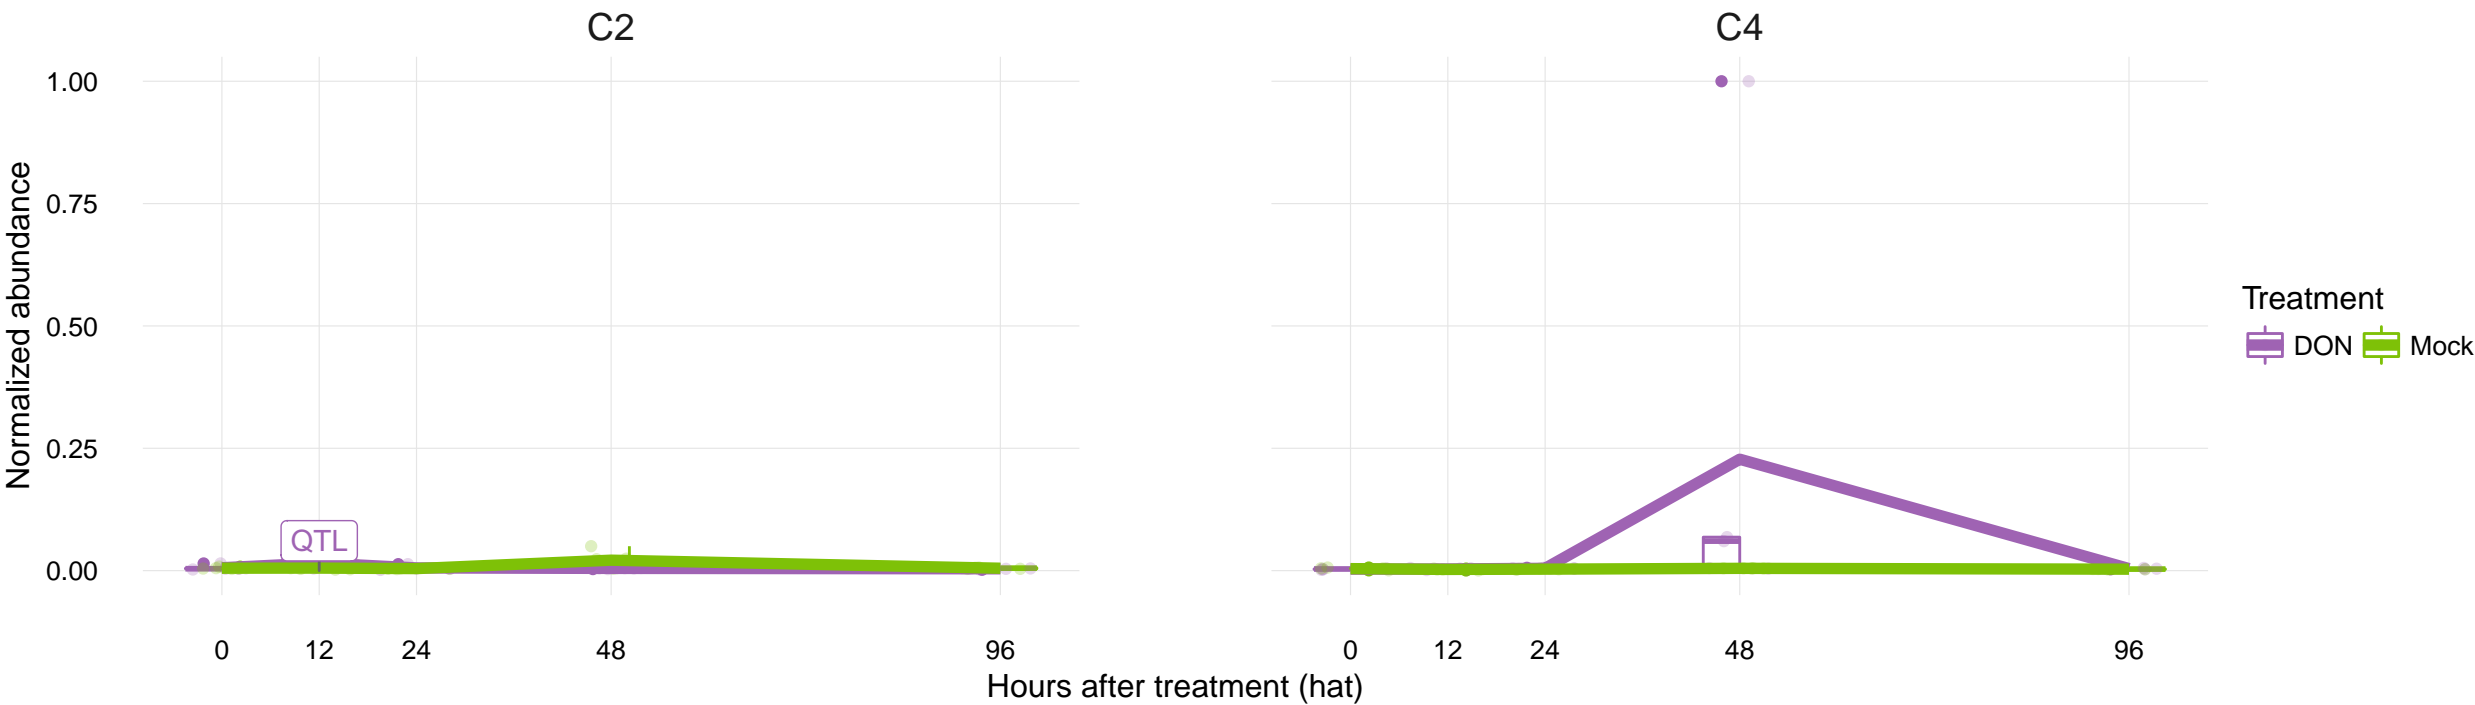

## DON, Mock; different genotypes

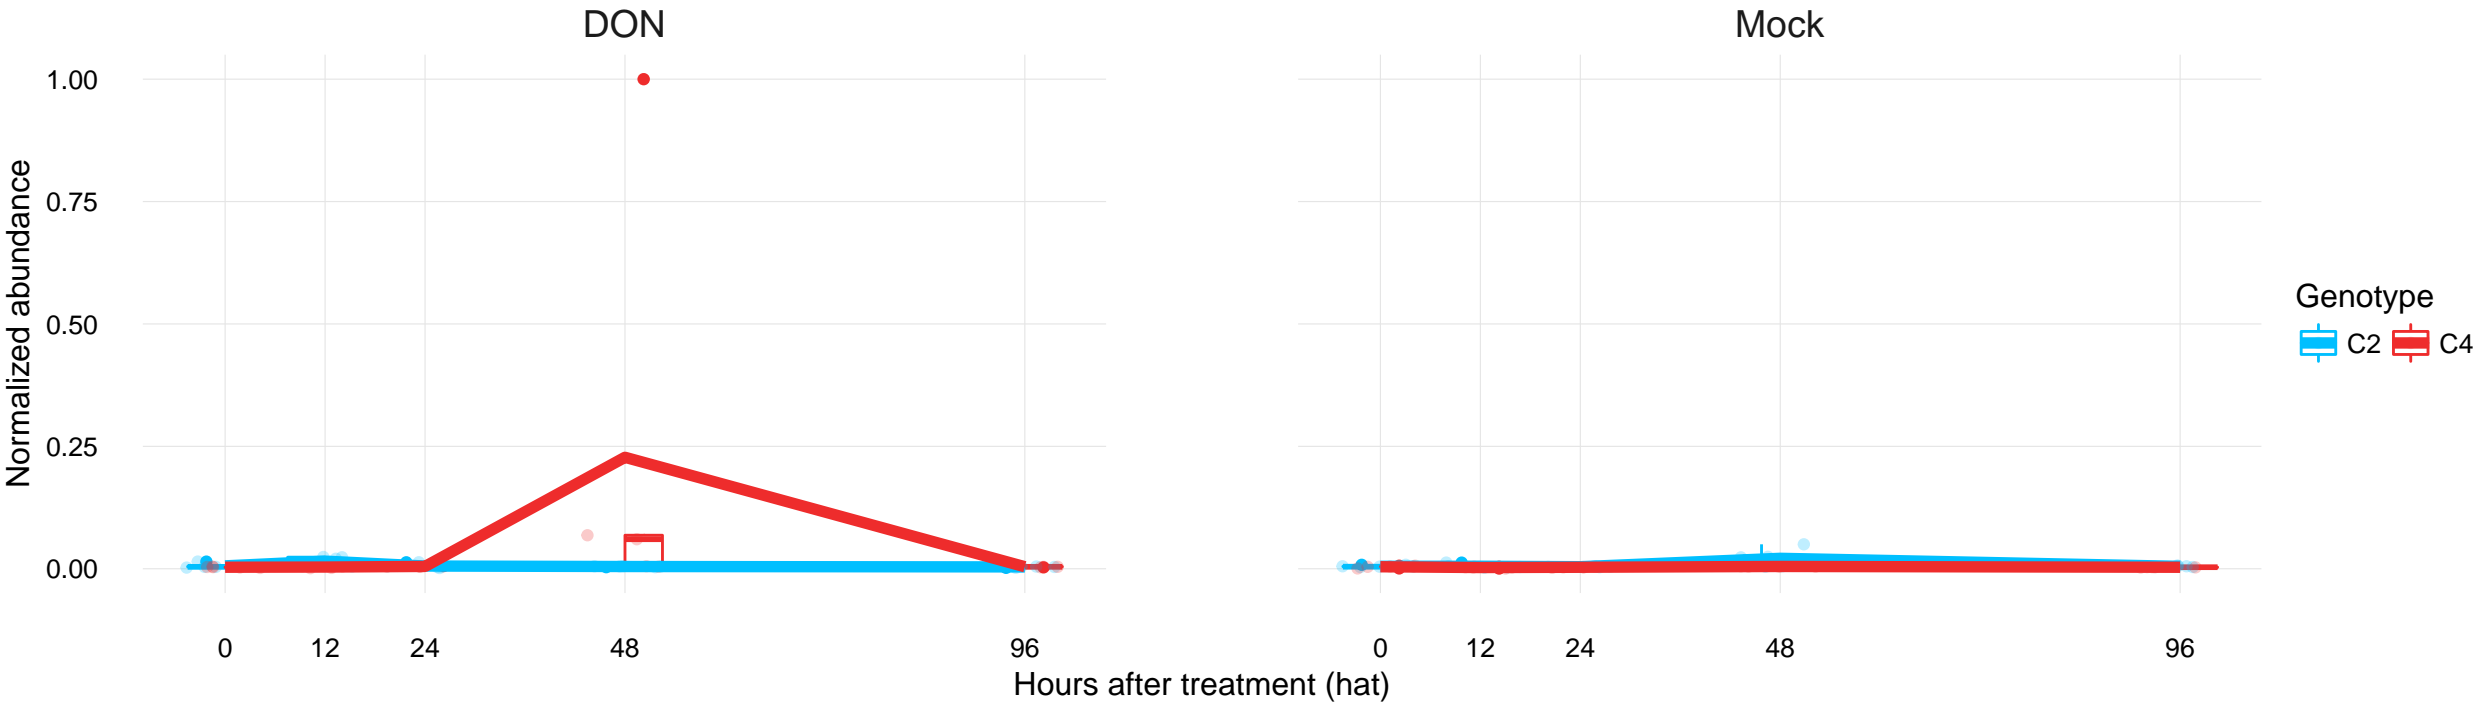

## CM, Remus; different treatments

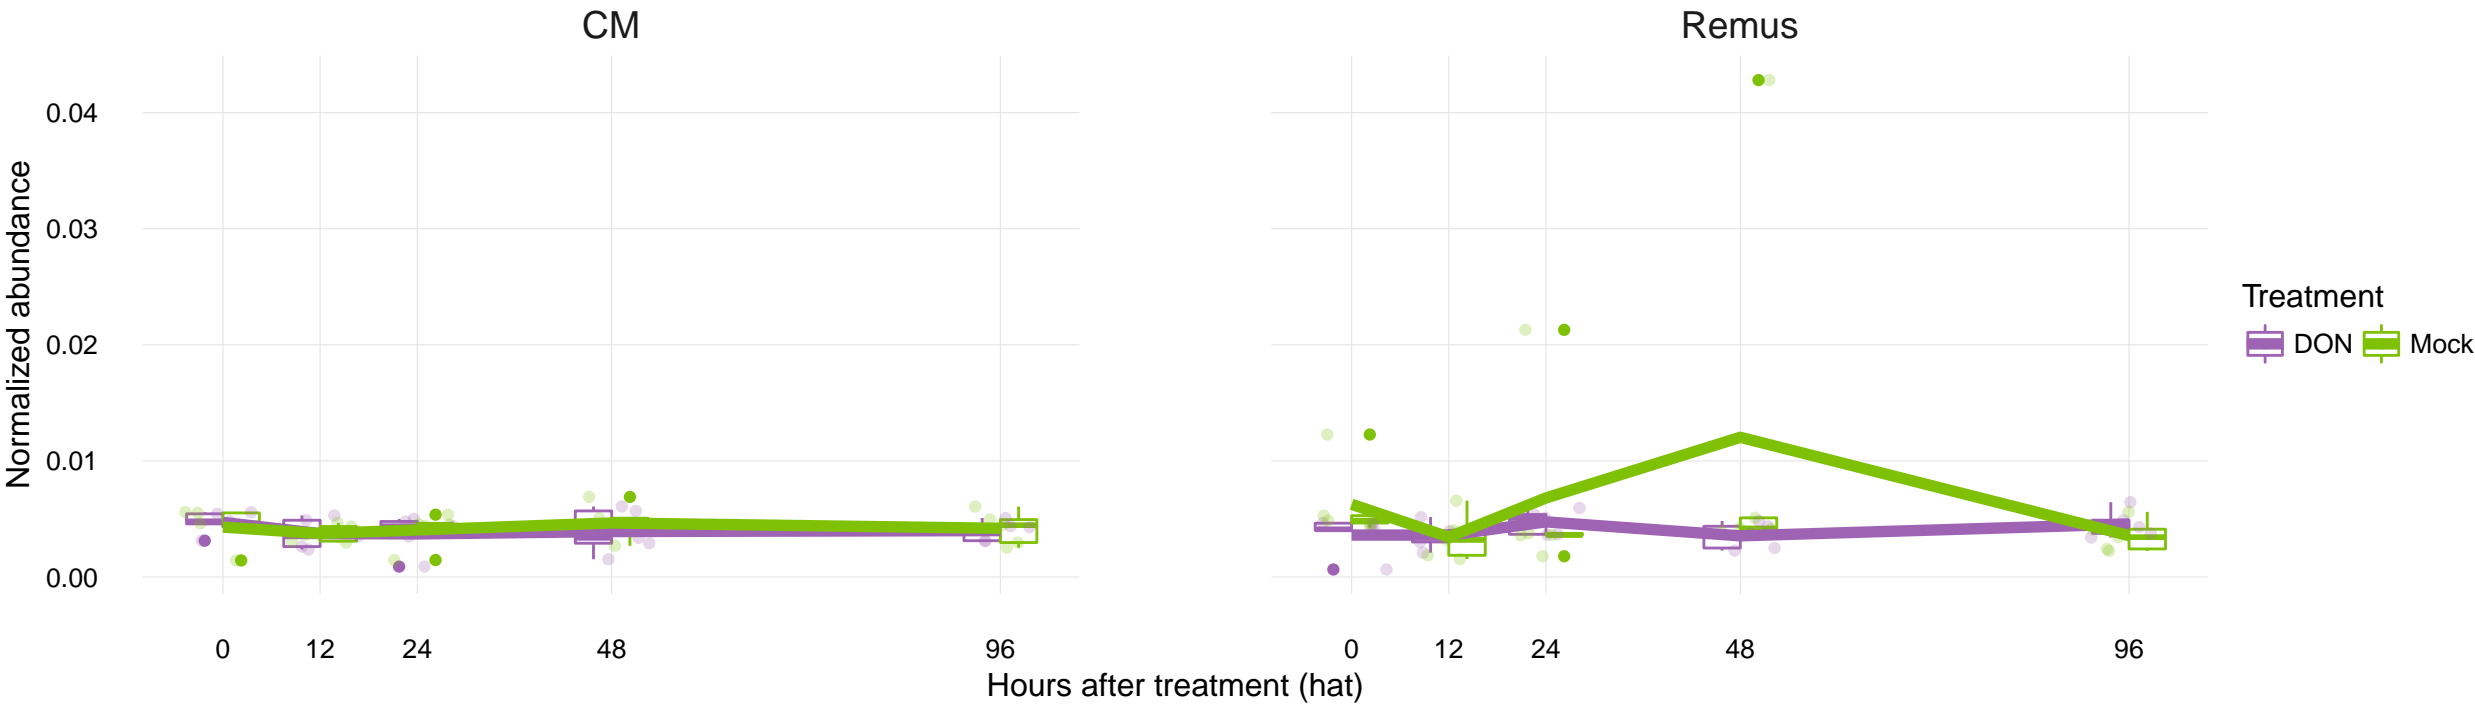

## DON, Mock; all four genotypes

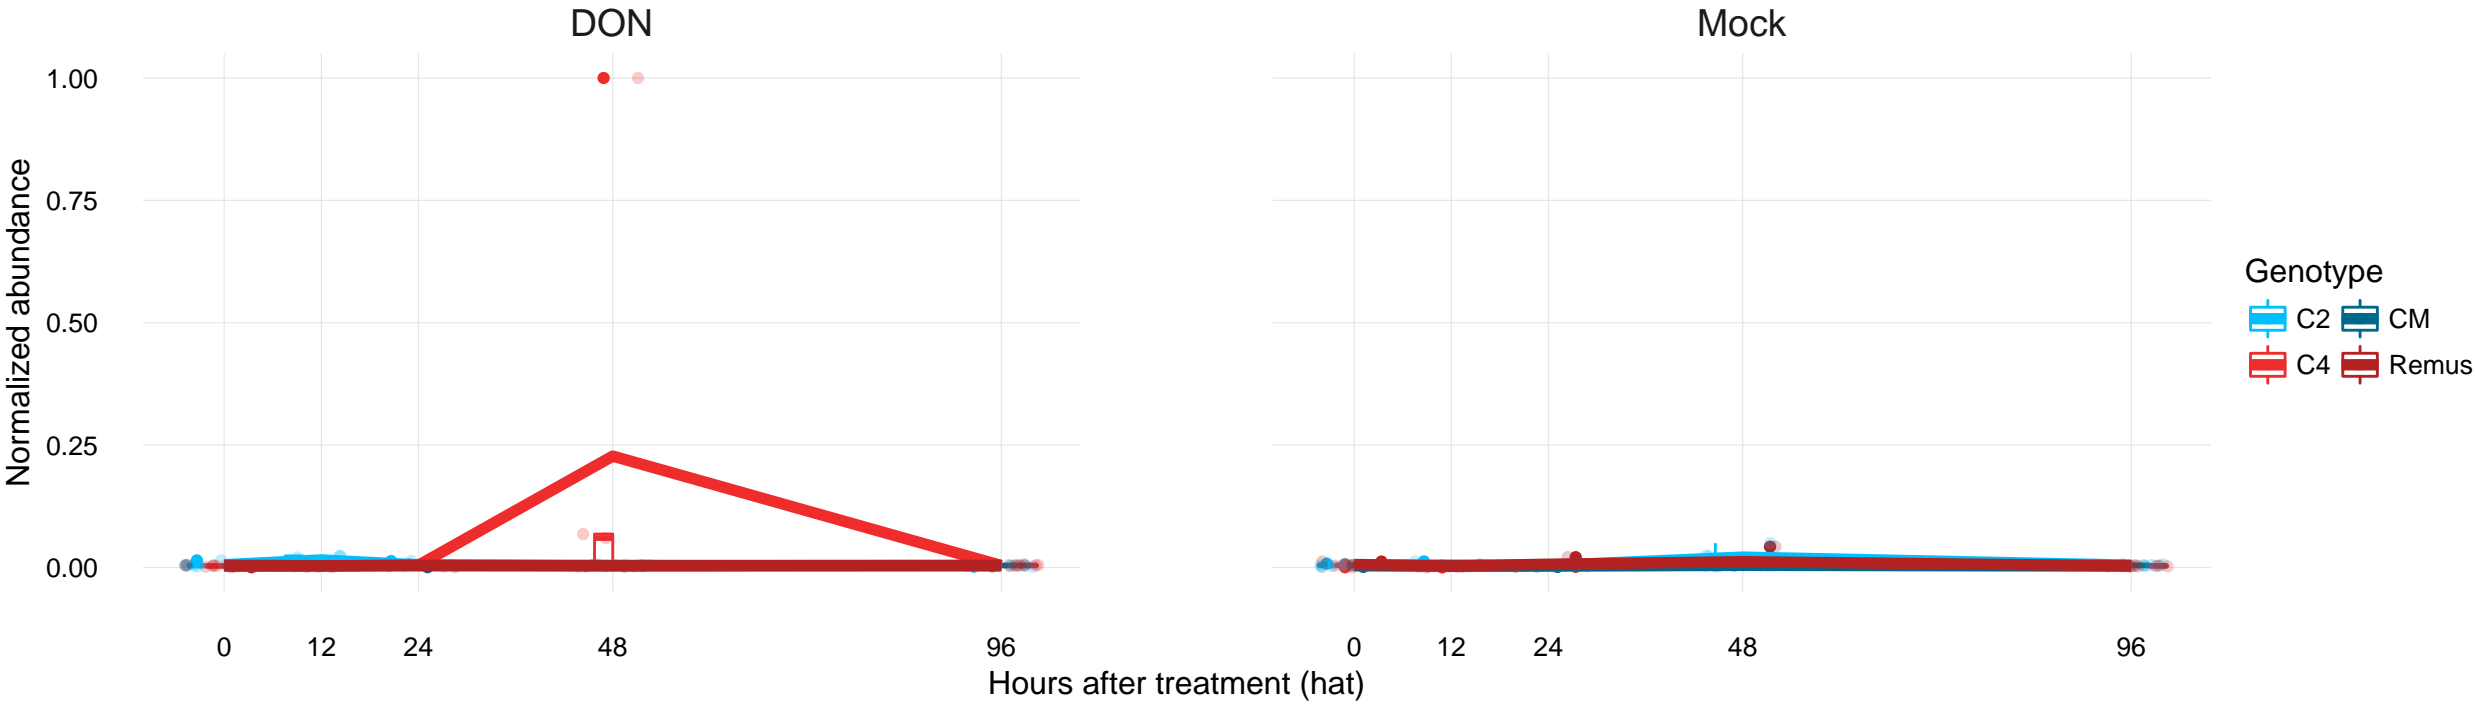

# A.106

Annotated as Flavonoid  
(30 database hits)

|                |                                                |
|----------------|------------------------------------------------|
| MZ             | 373.1281                                       |
| RT             | 17.44 min                                      |
| Normalization  | Indirectly via surrogate<br>in the KPX samples |
| Cluster        | —                                              |
| Cn total / Phe | 20 / 9                                         |

## C2, C4; different treatments

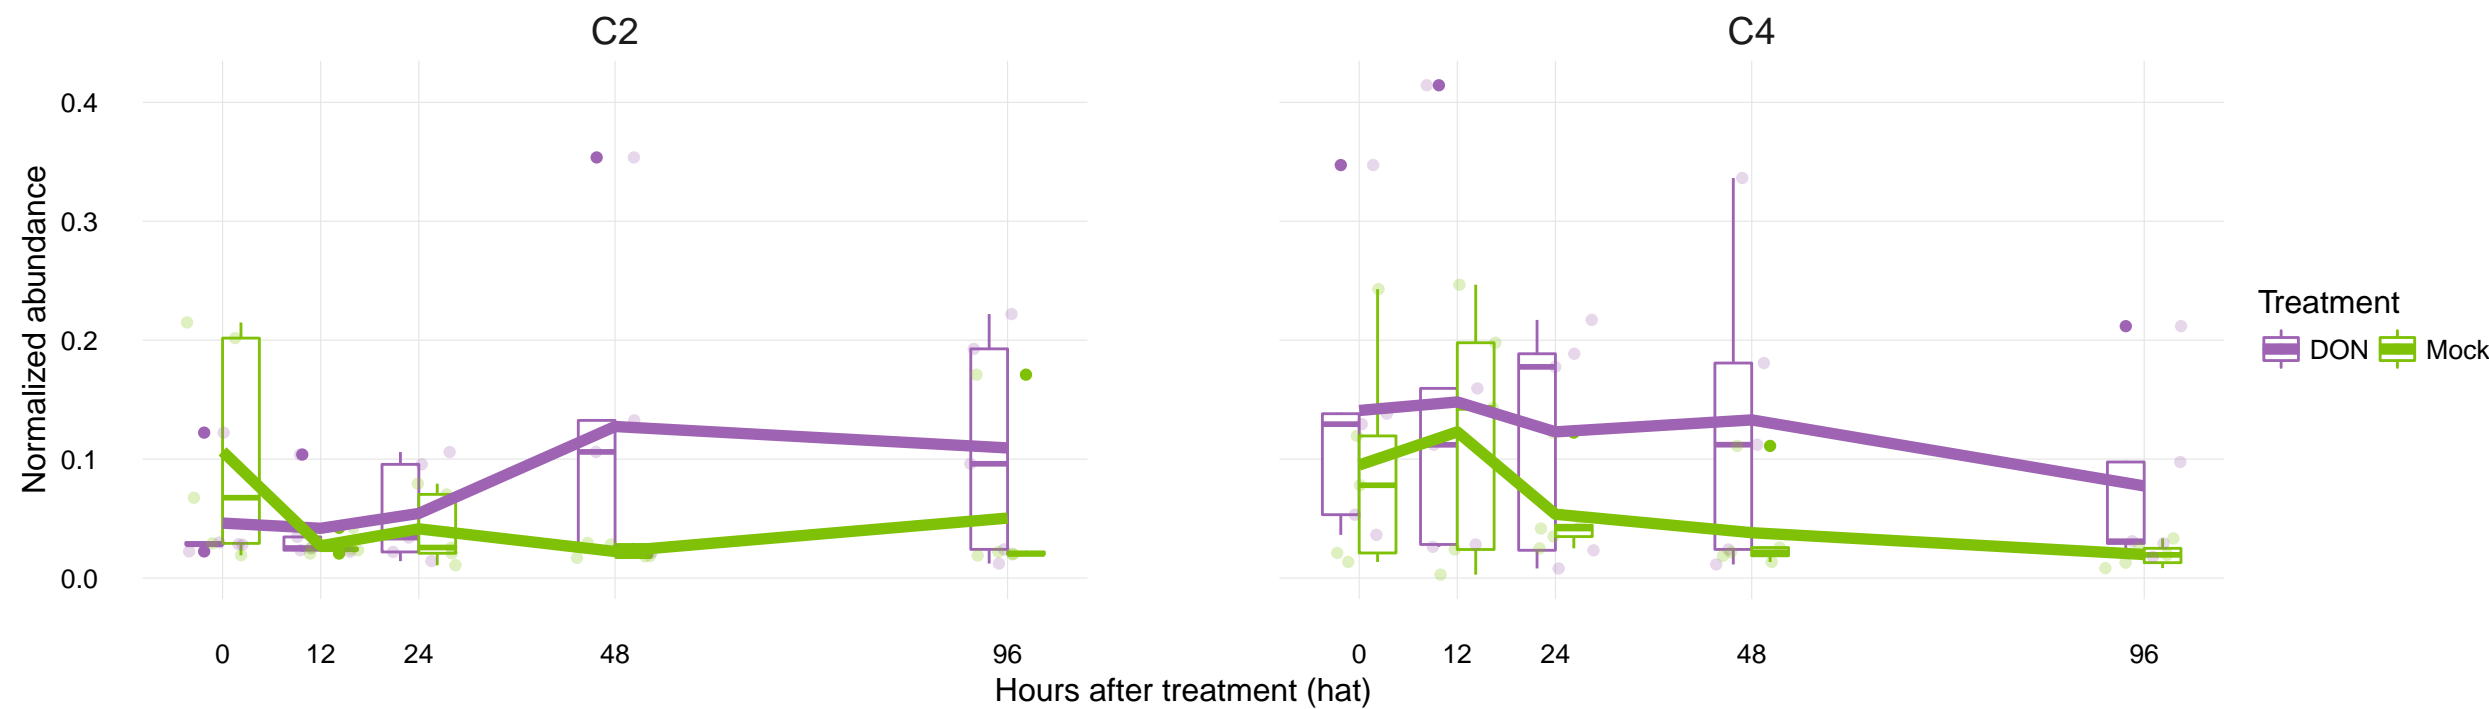

## DON, Mock; different genotypes

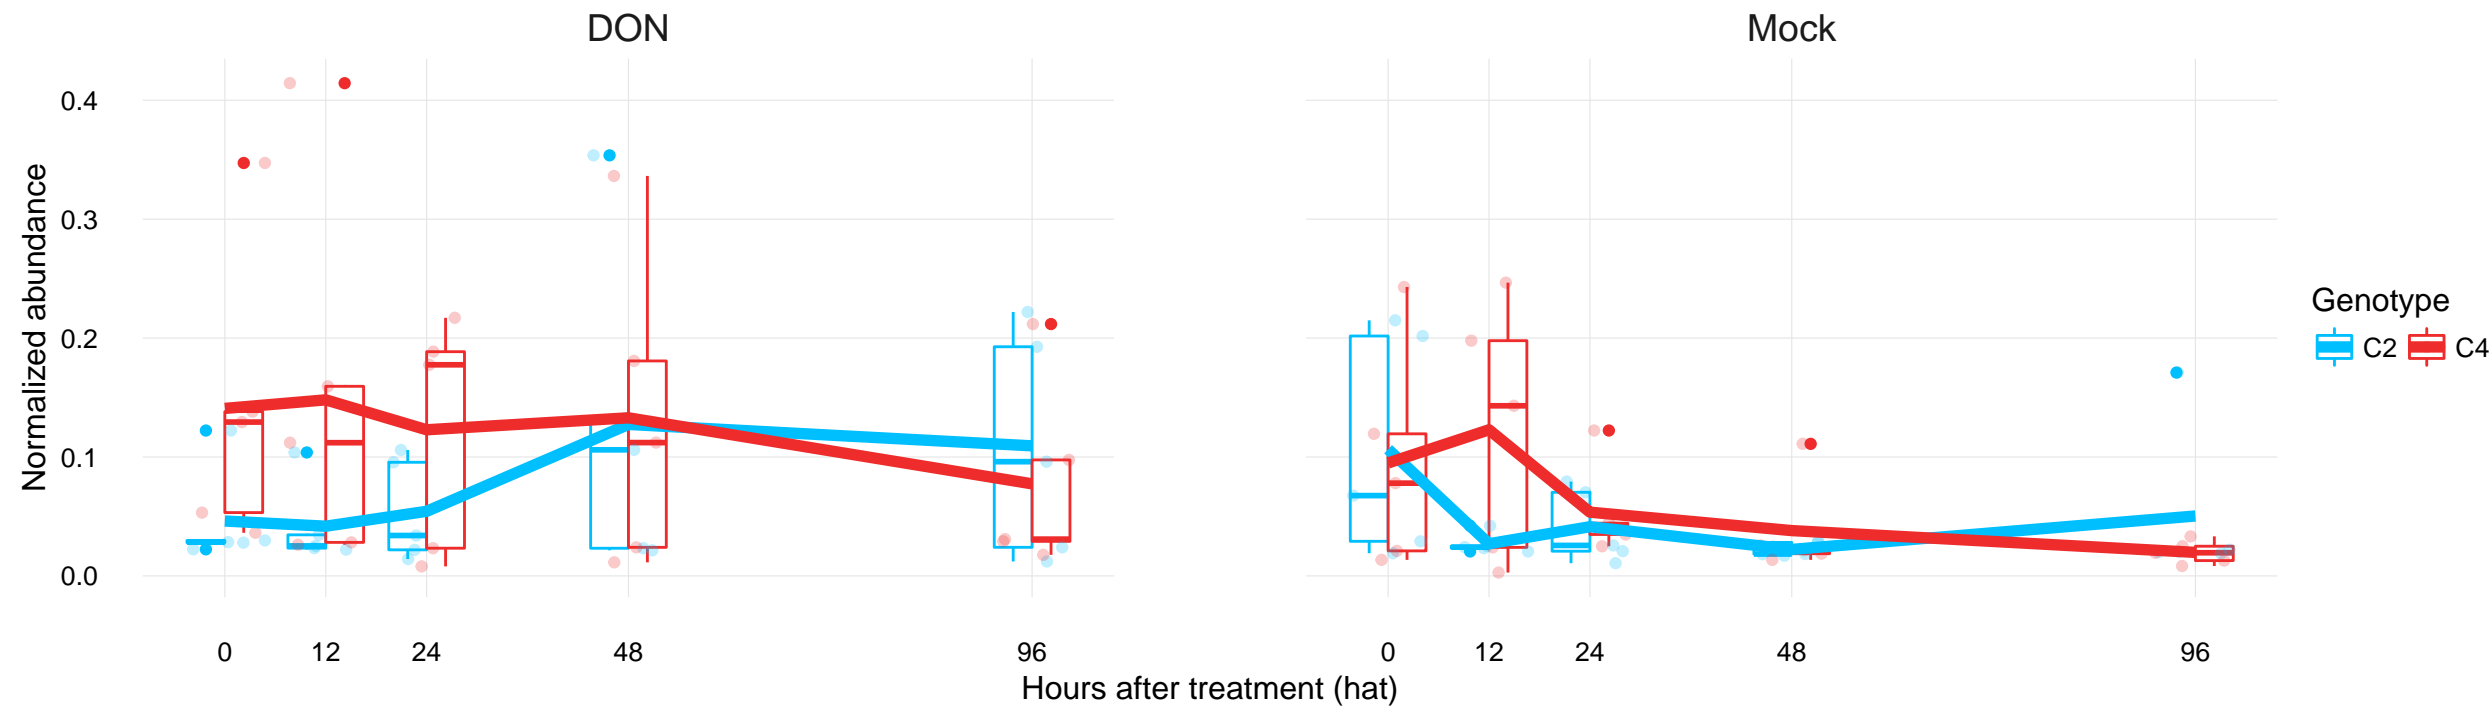

## CM, Remus; different treatments

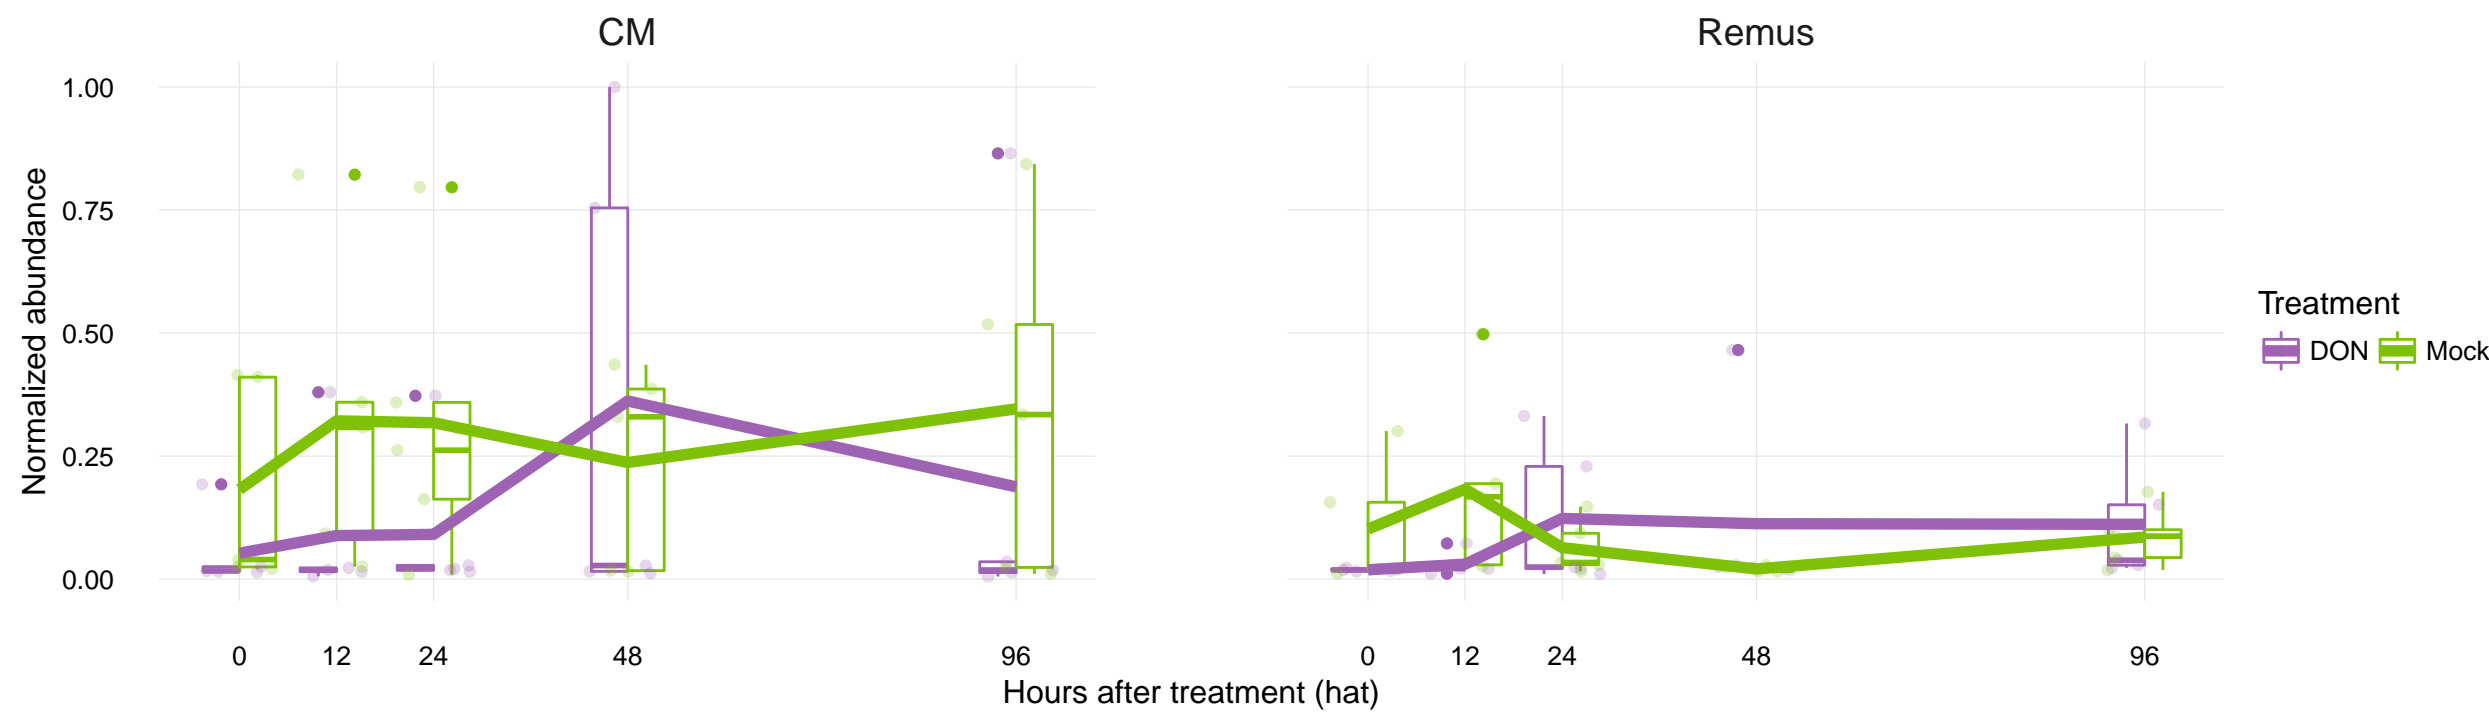

## DON, Mock; all four genotypes

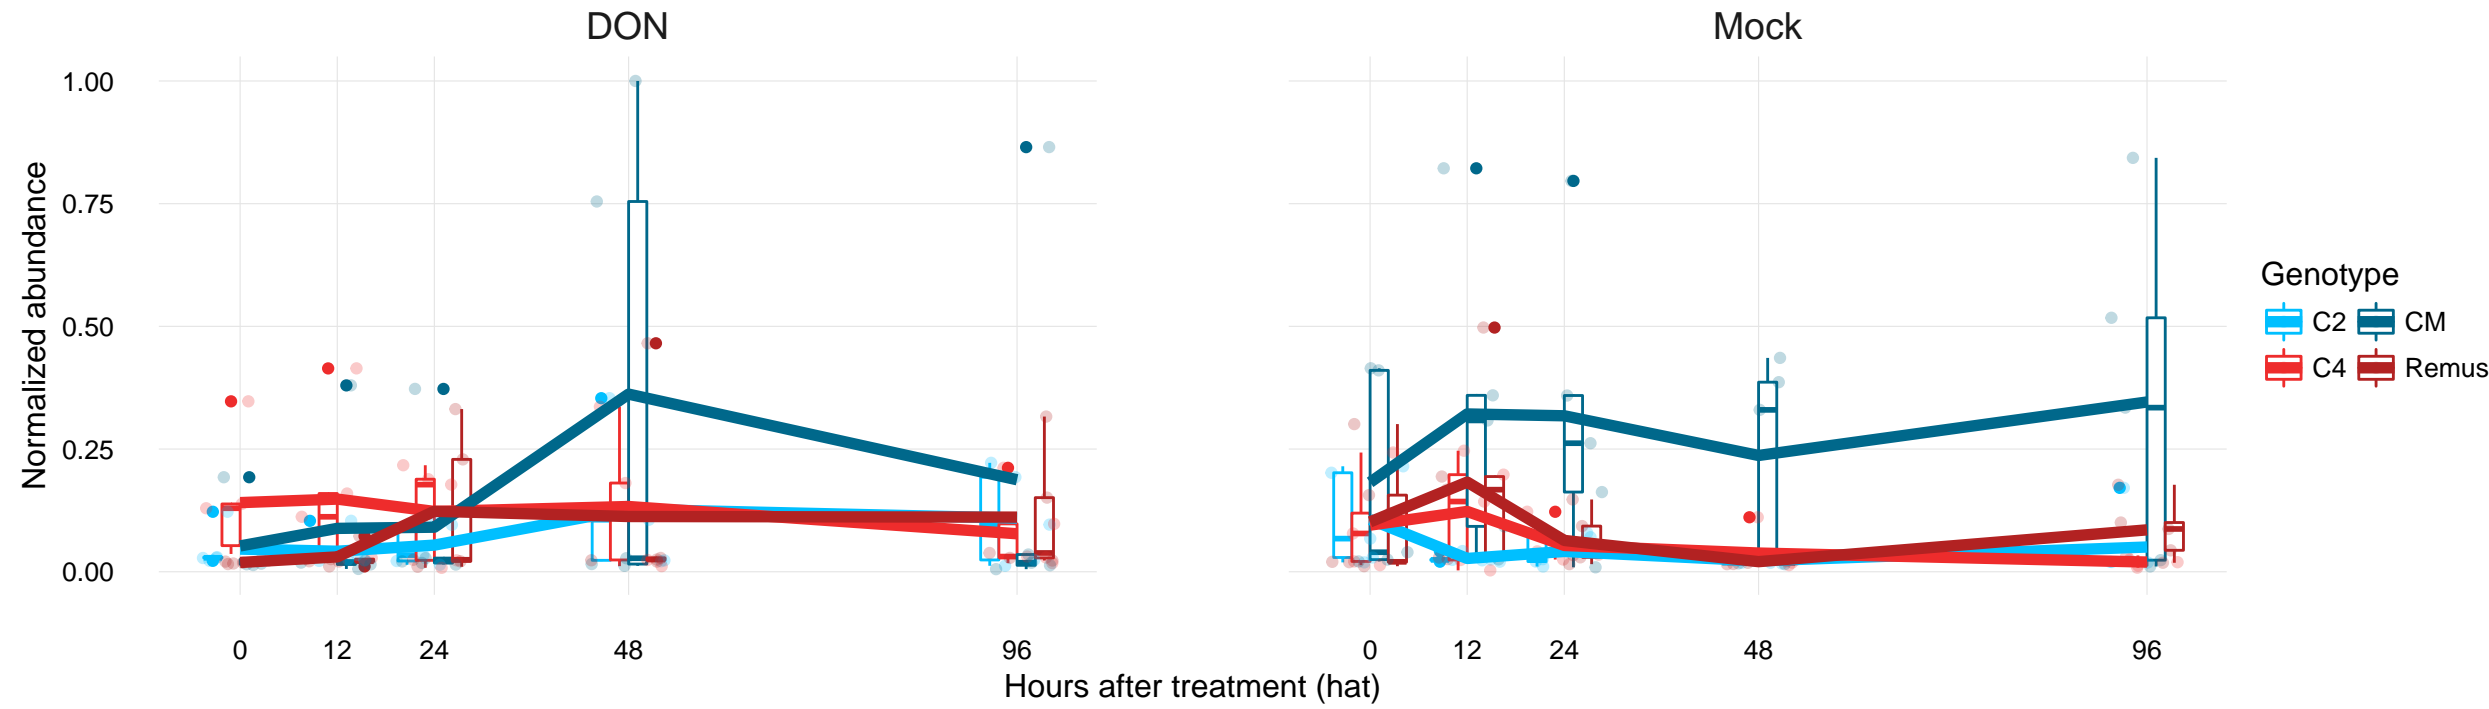

# A.6

Annotated as others  
(4 database hits)

|                |                |
|----------------|----------------|
| MZ             | 137.0597       |
| RT             | 4.18 min       |
| Normalization  | Not normalized |
| Cluster        | –              |
| Cn total / Phe | 8 /            |

## C2, C4; different treatments

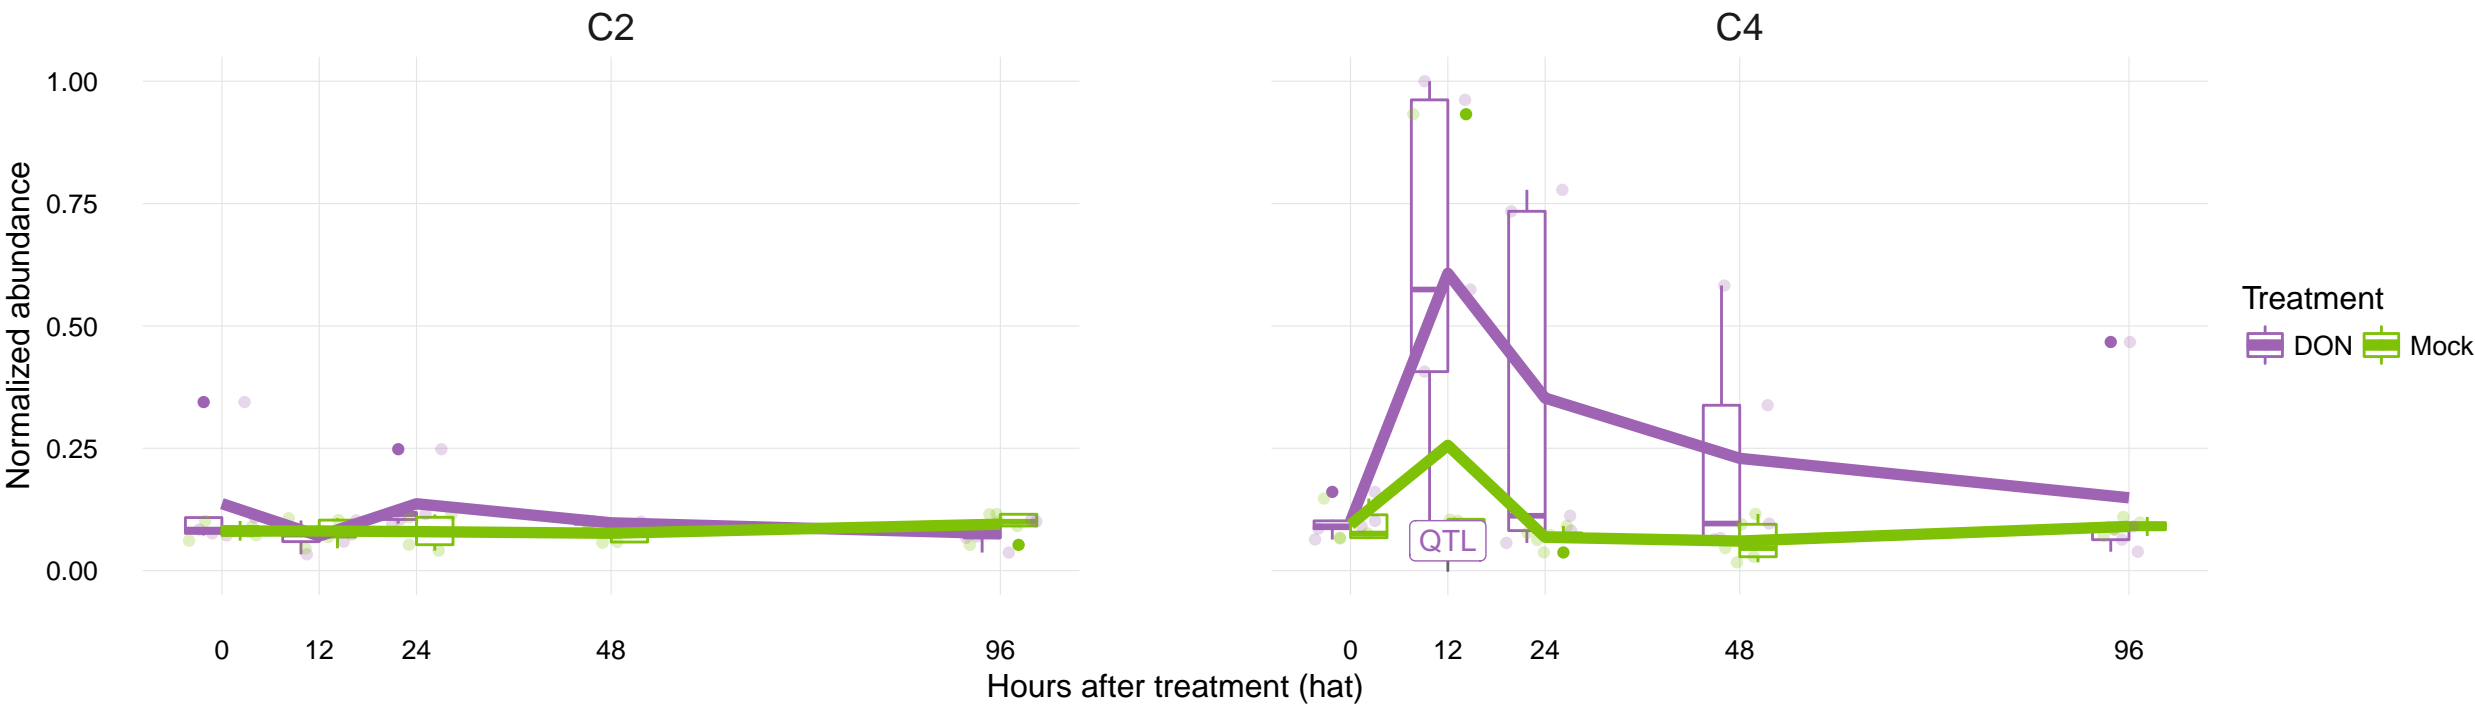

## DON, Mock; different genotypes

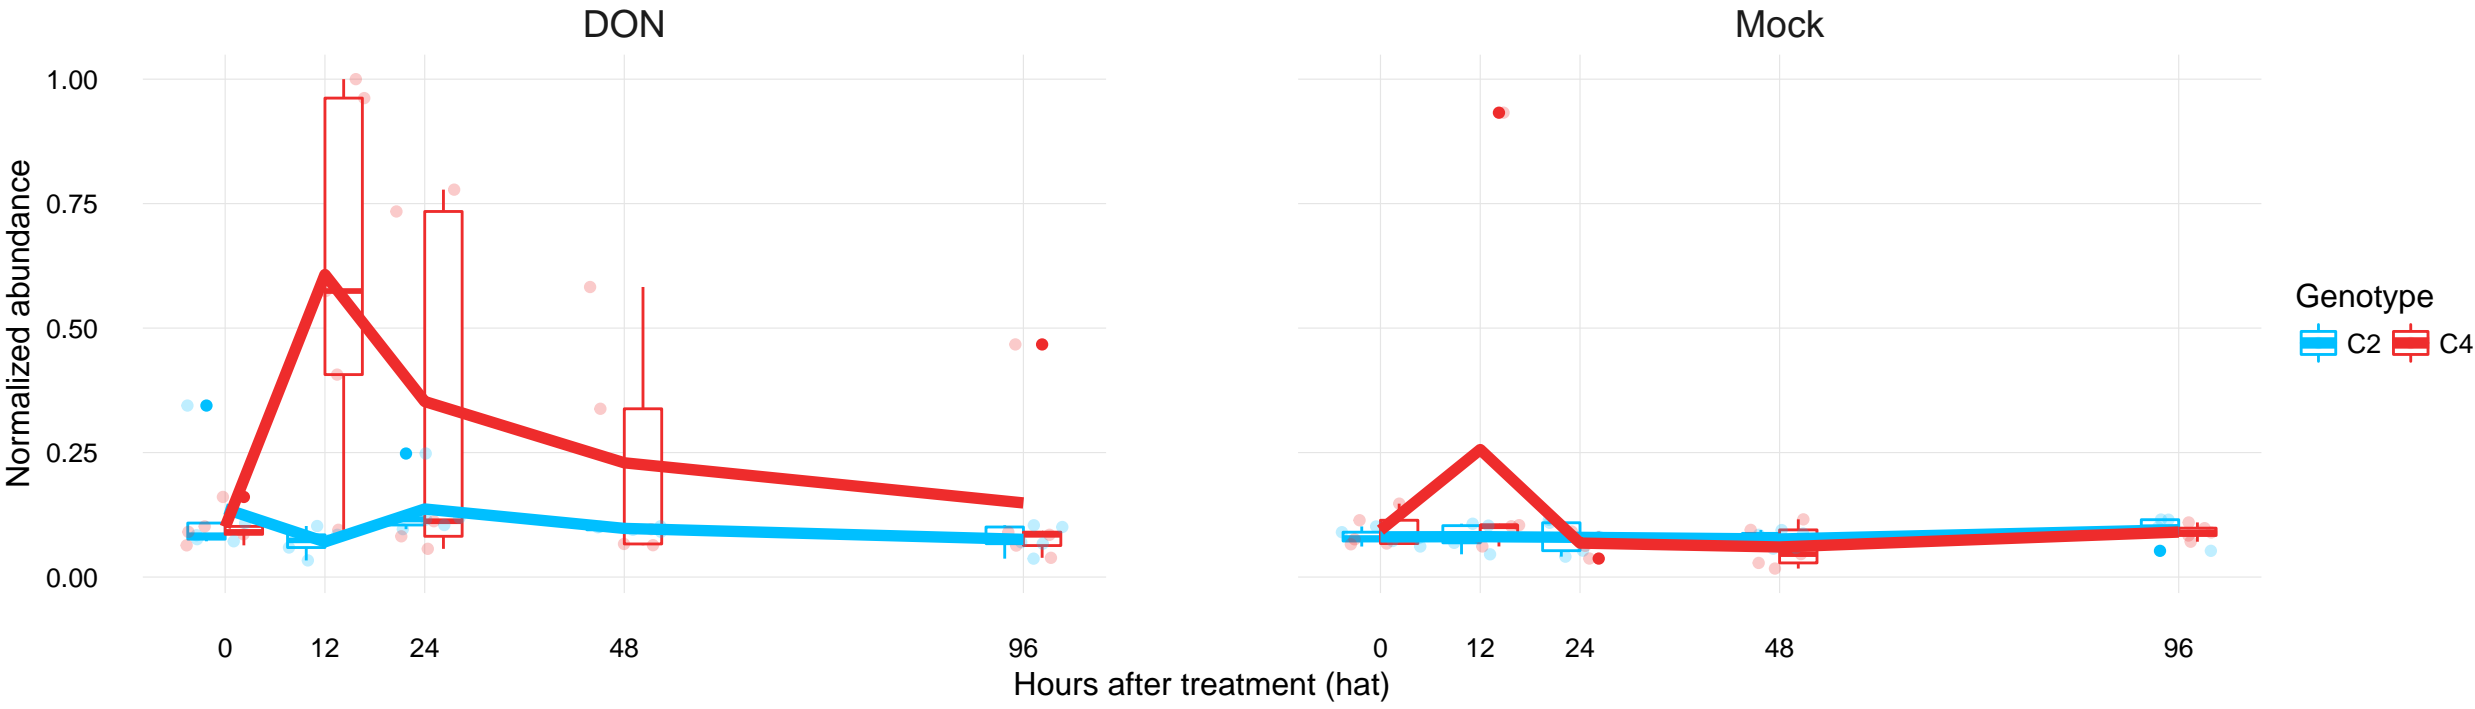

## CM, Remus; different treatments

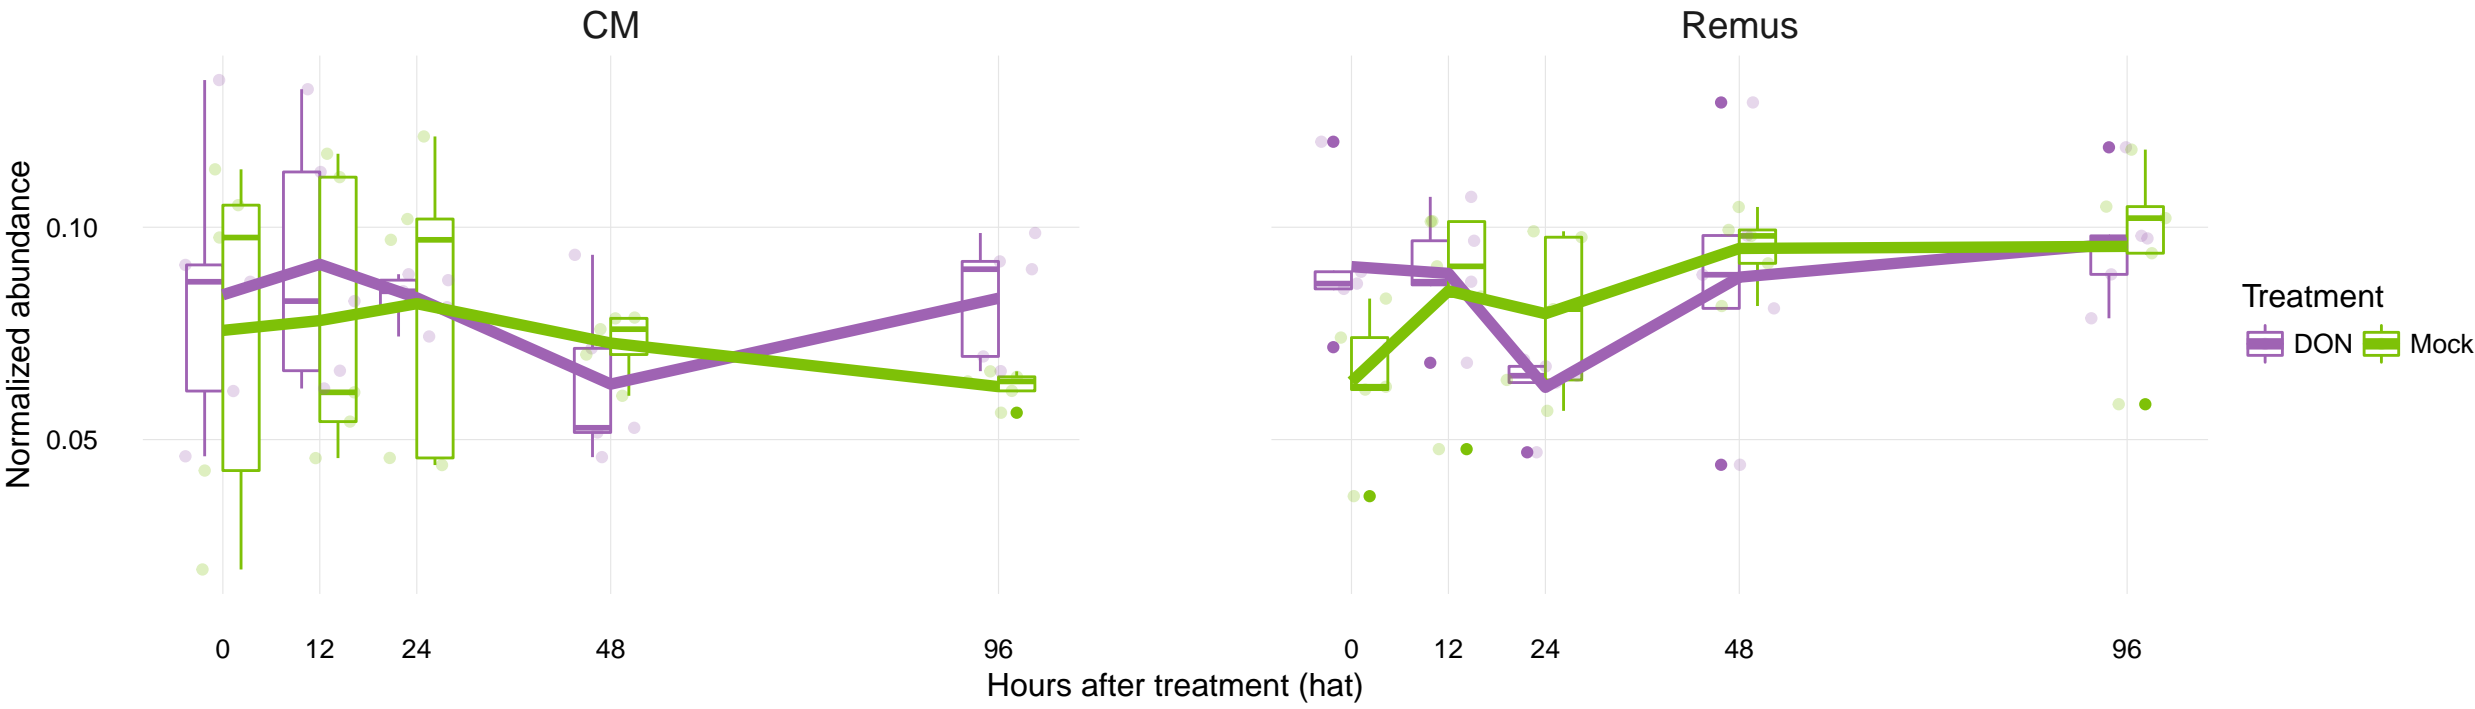

## DON, Mock; all four genotypes

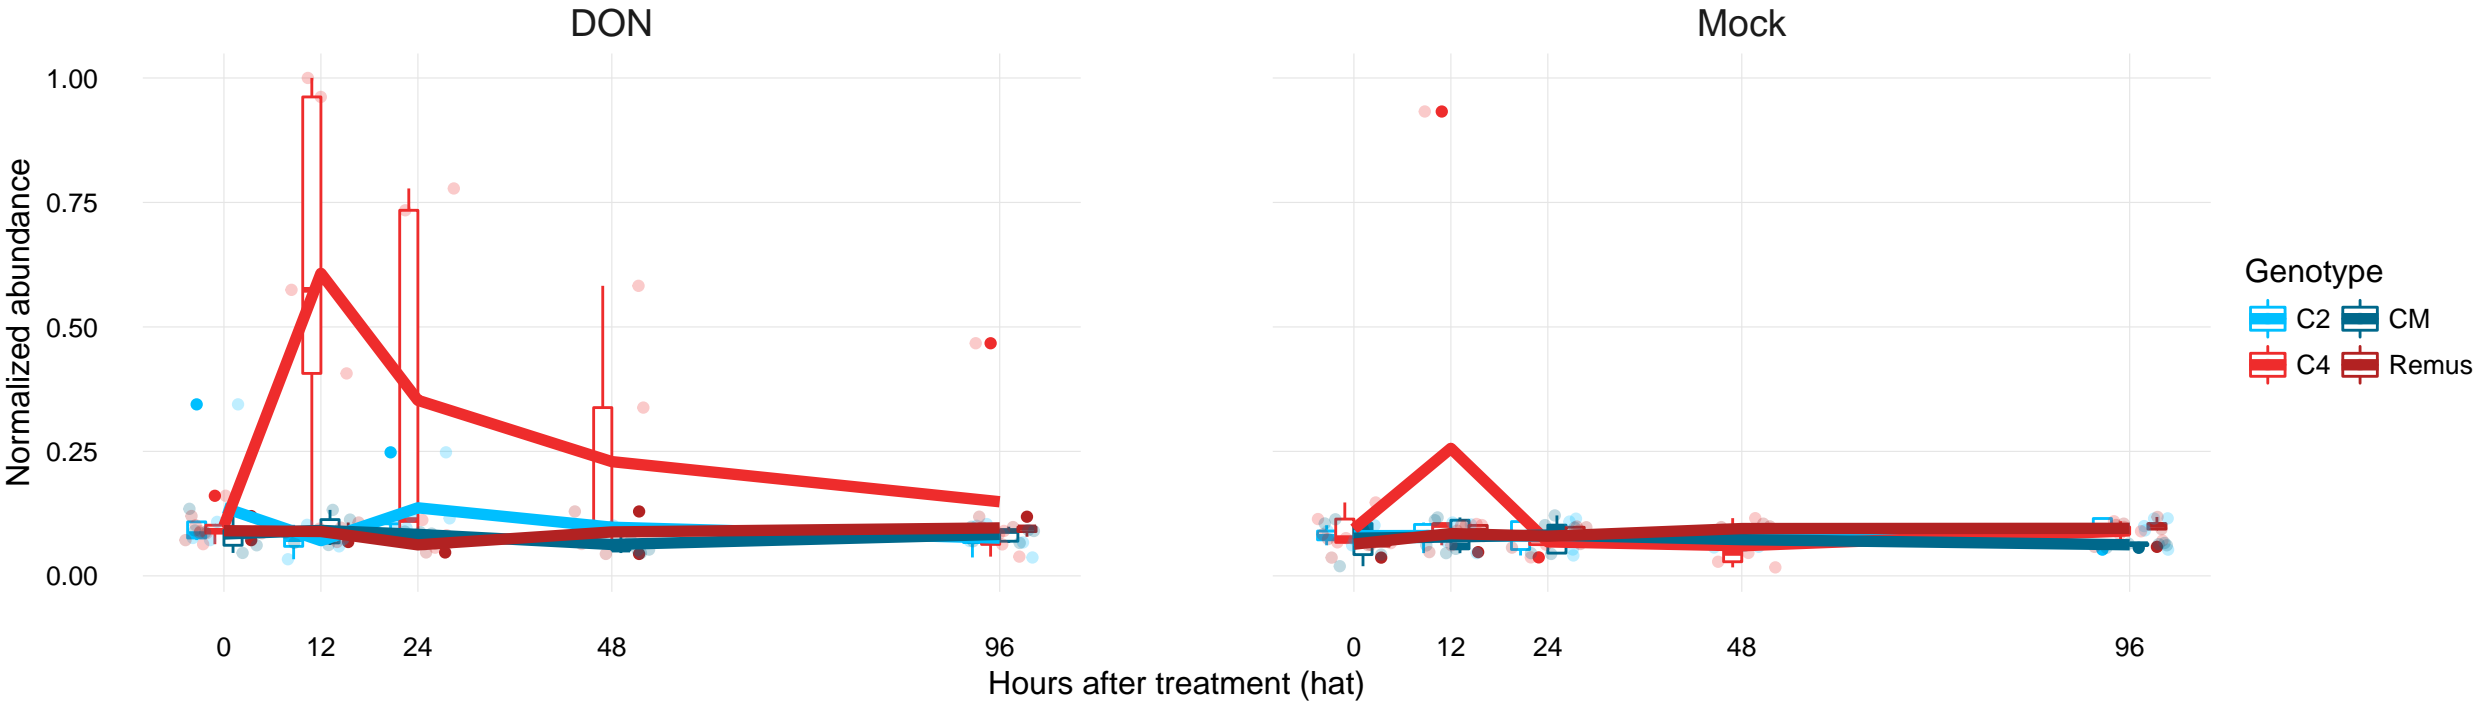

# A.33

Annotated as HCA derivative  
(1 database hit)

|                |                                                |
|----------------|------------------------------------------------|
| MZ             | 395.1313                                       |
| RT             | 9.66 min                                       |
| Normalization  | Indirectly via surrogate<br>in the KPX samples |
| Cluster        | –                                              |
| Cn total / Phe | 17 /                                           |

## C2, C4; different treatments

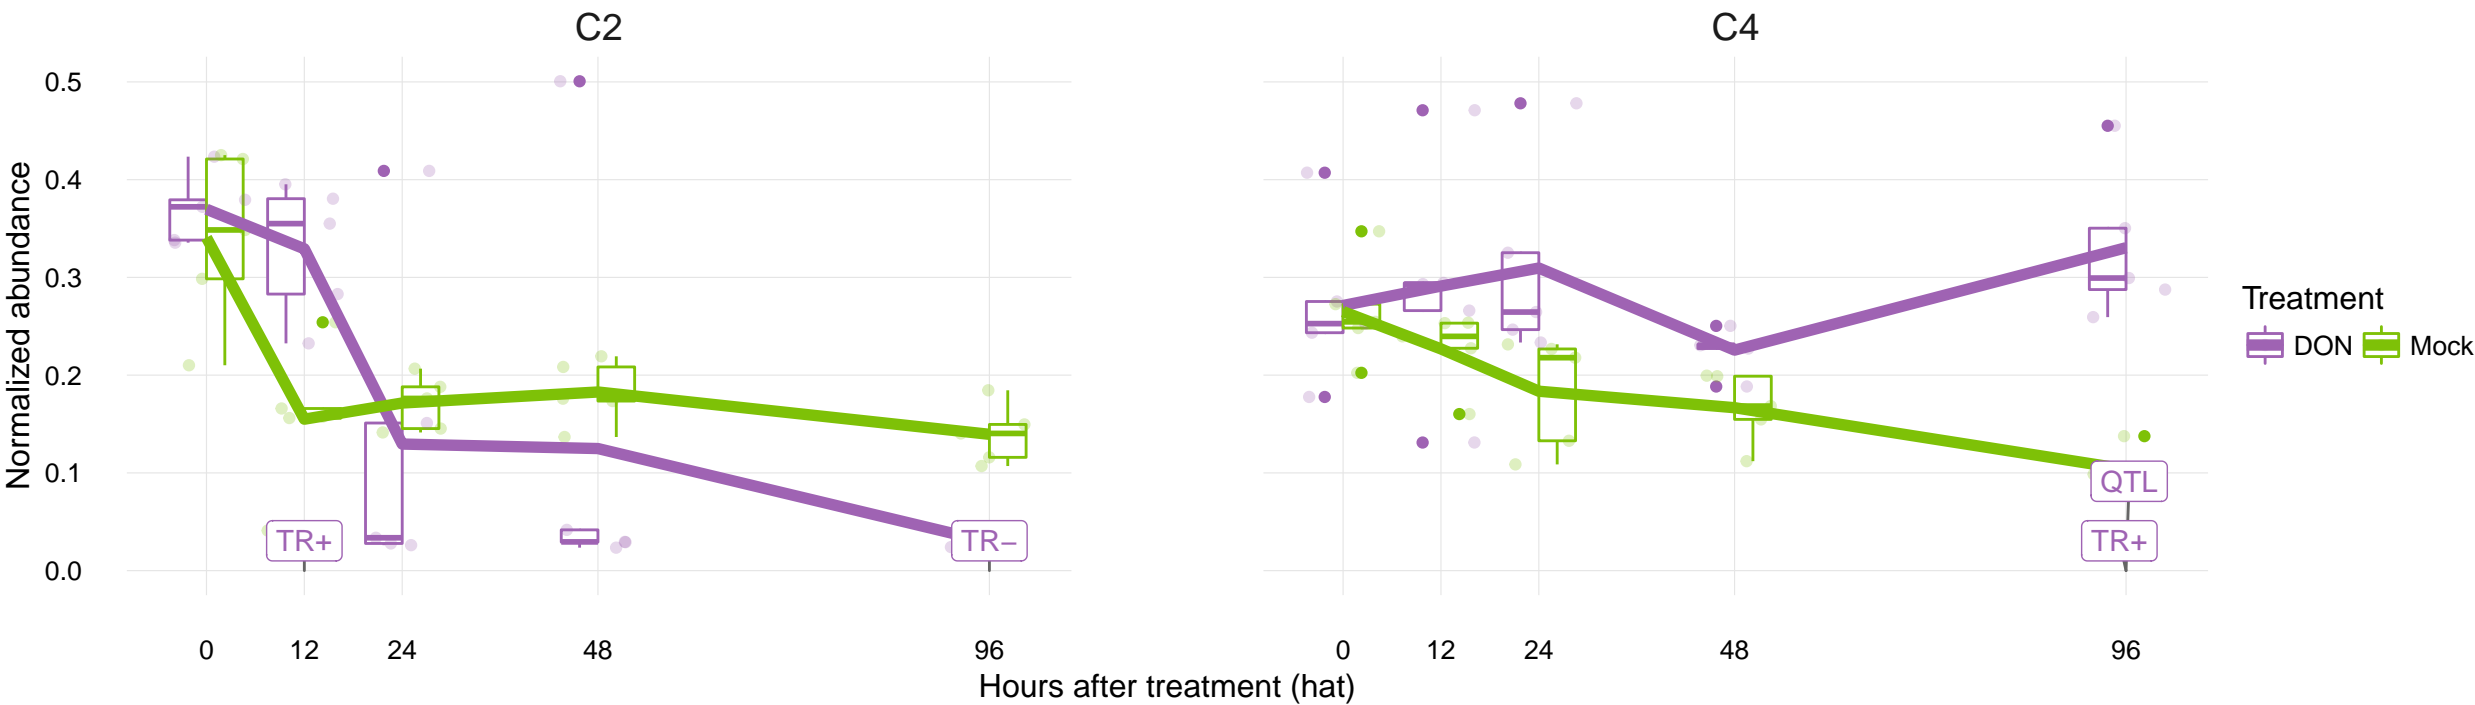

## DON, Mock; different genotypes

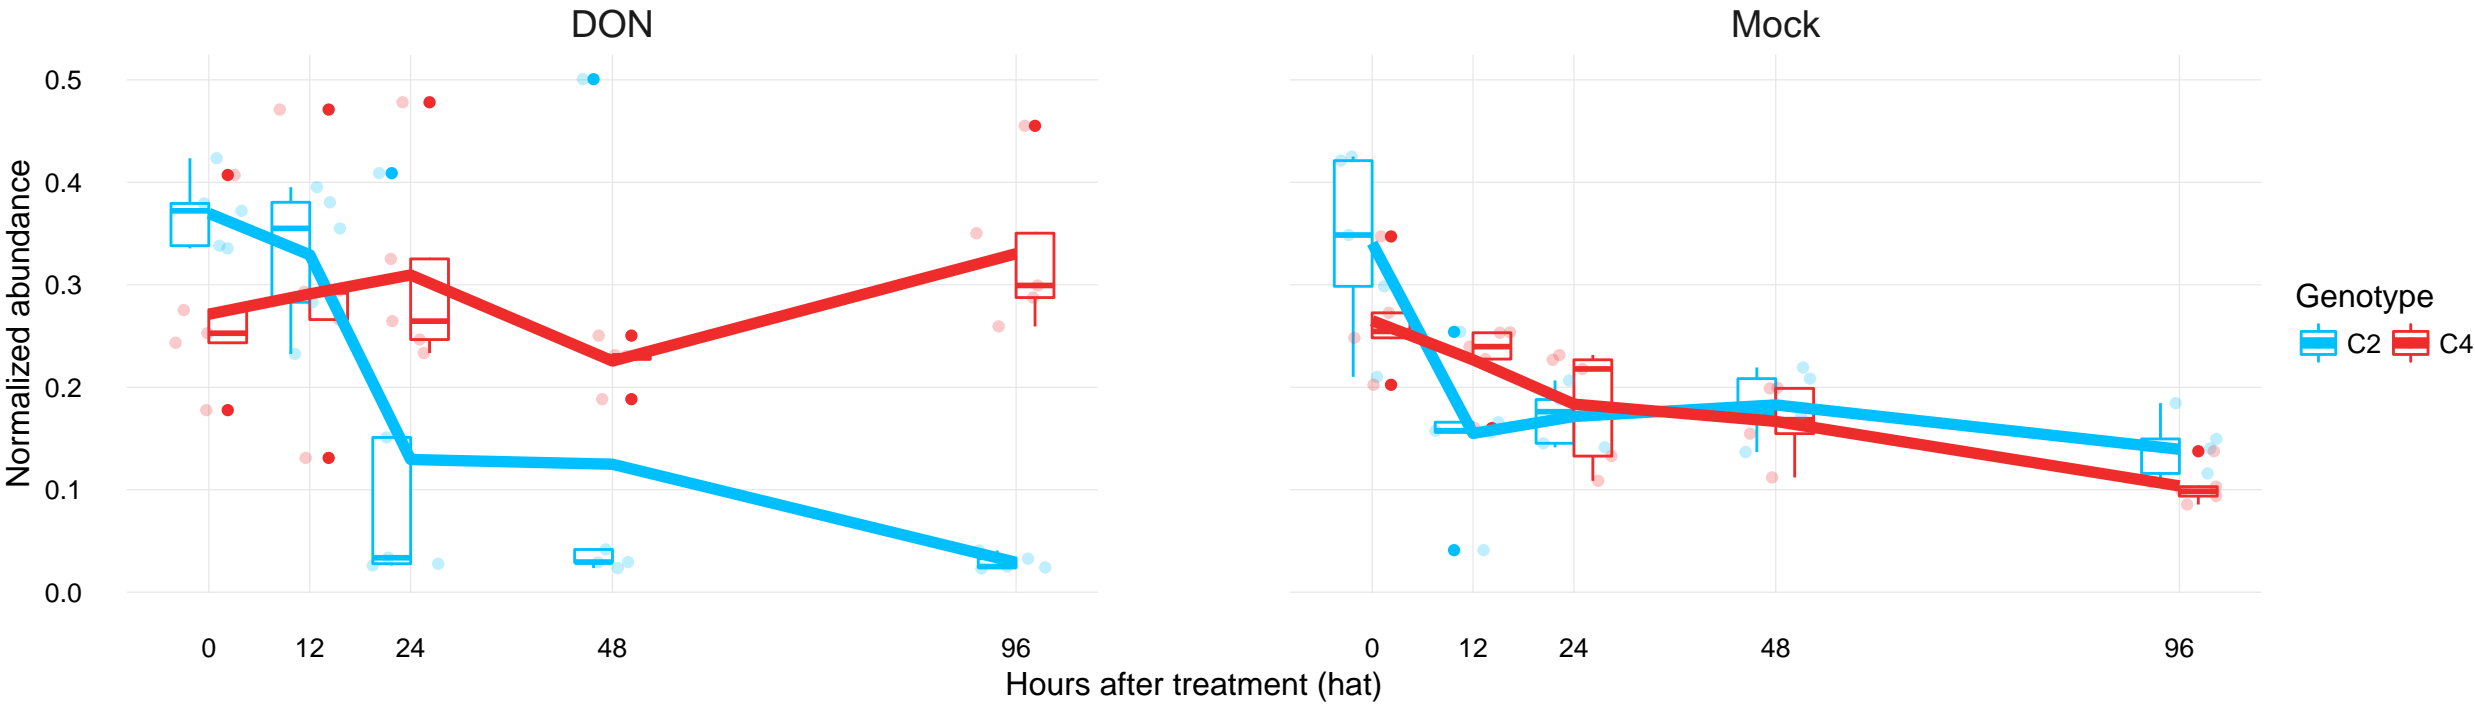

## CM, Remus; different treatments

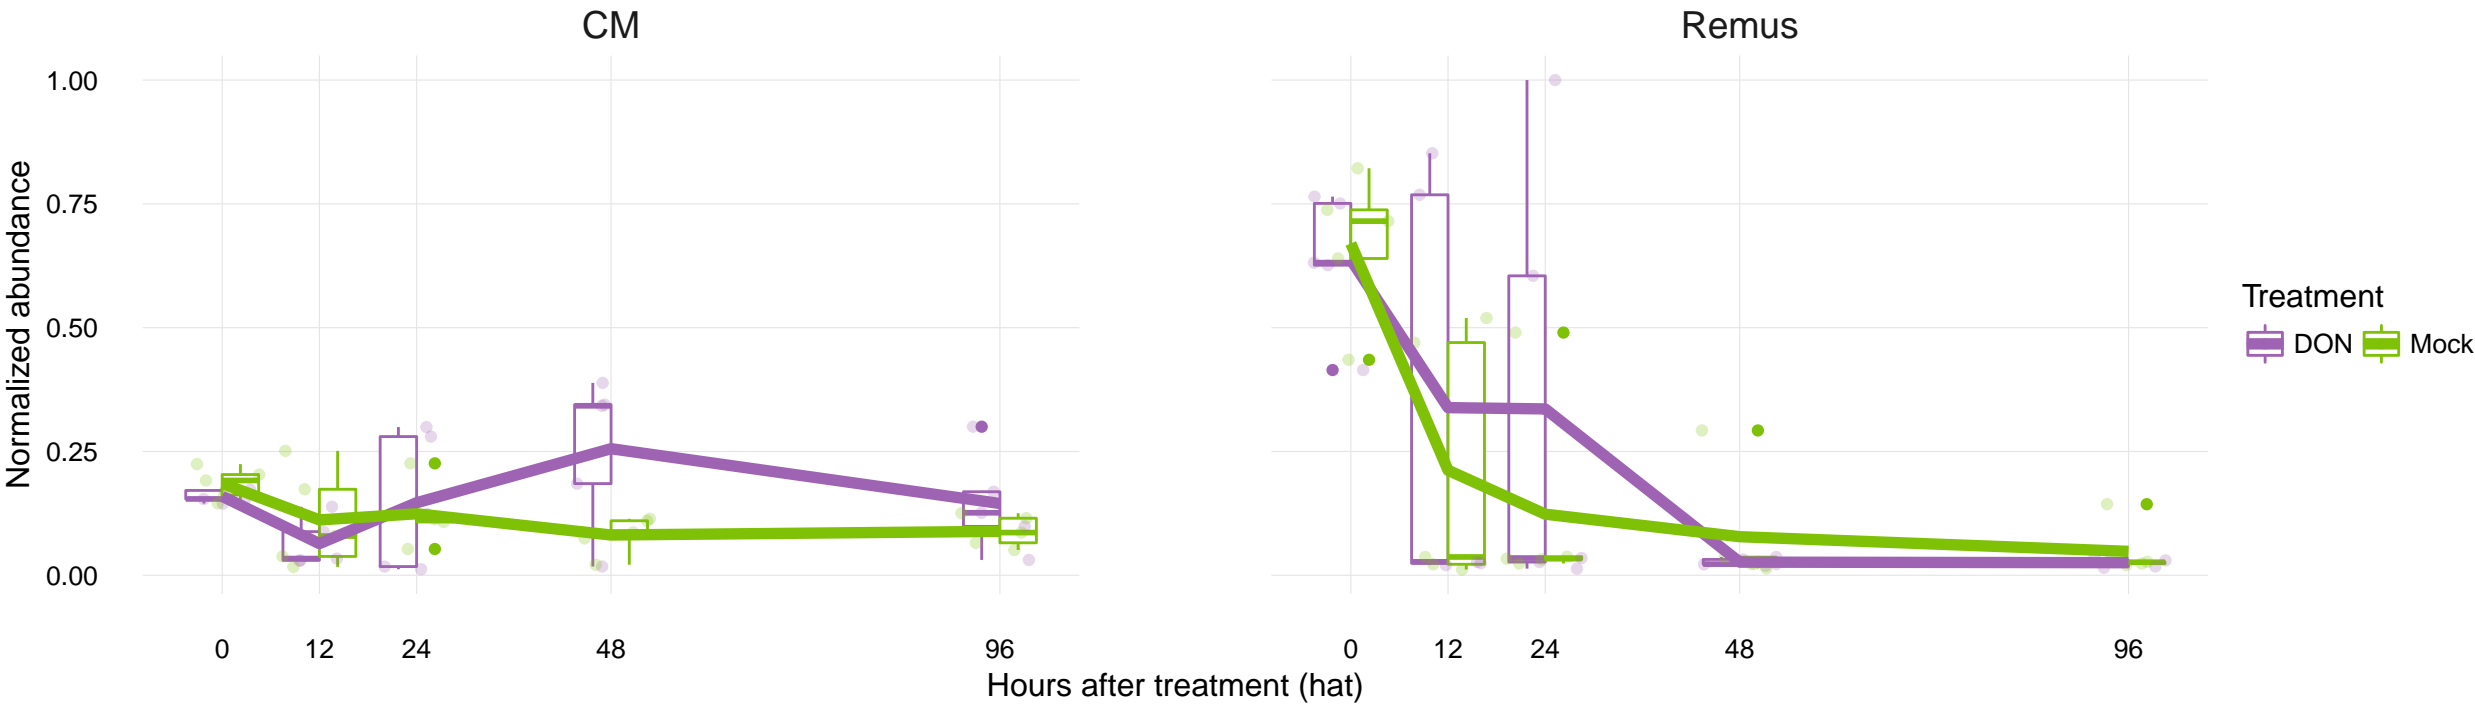

## DON, Mock; all four genotypes

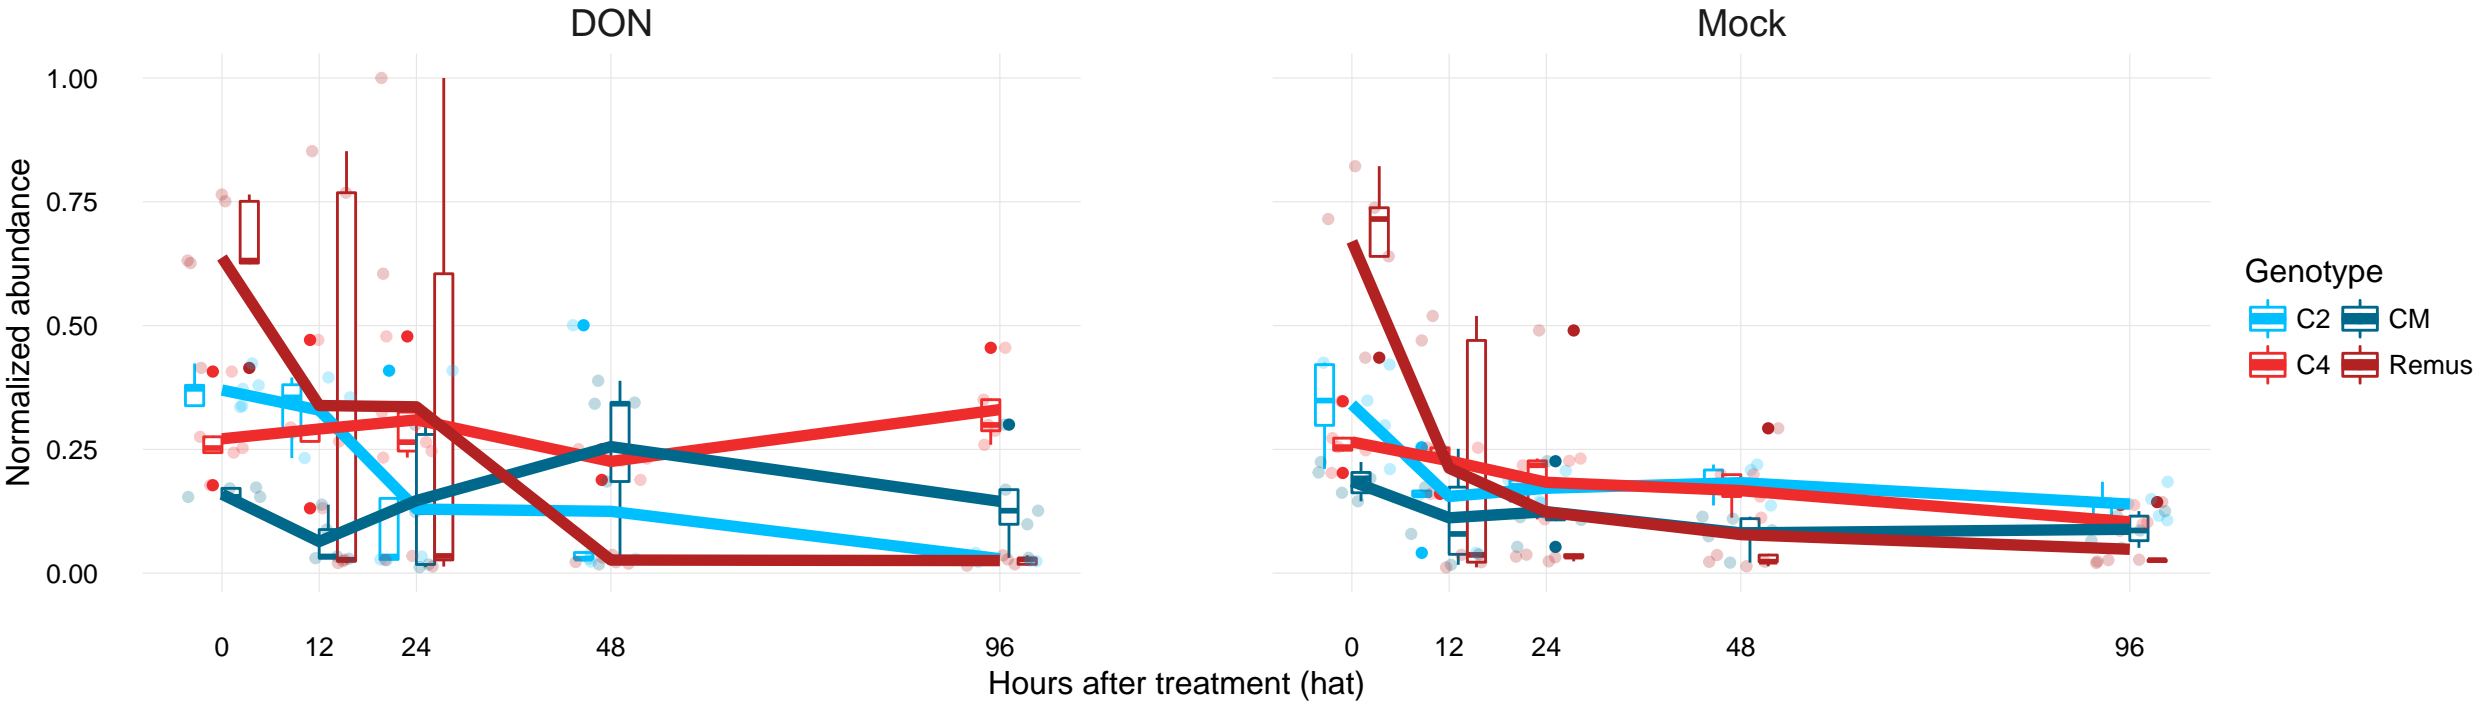

# A.90

Annotated as Flavonoid (GlcF)  
(69 database hits)

|                |                                                |
|----------------|------------------------------------------------|
| MZ             | 463.1237                                       |
| RT             | 15.58 min                                      |
| Normalization  | Indirectly via surrogate<br>in the KPX samples |
| Cluster        | –                                              |
| Cn total / Phe | 22 /                                           |

## C2, C4; different treatments

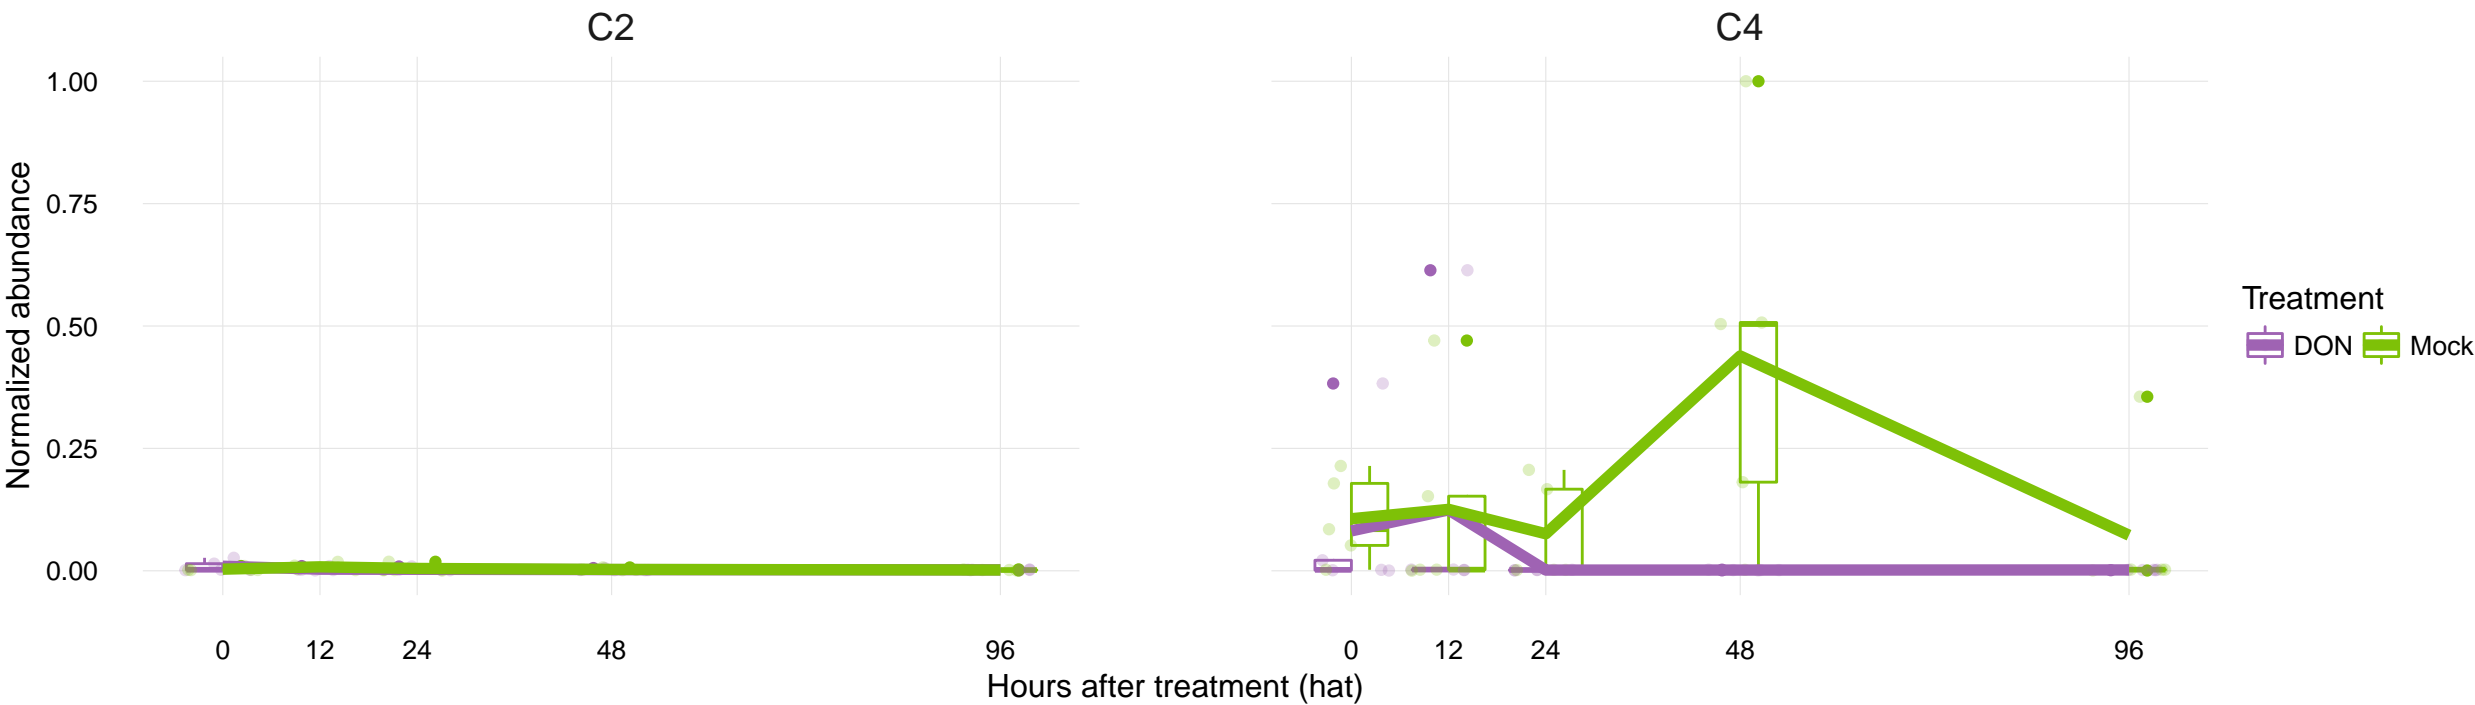

## DON, Mock; different genotypes

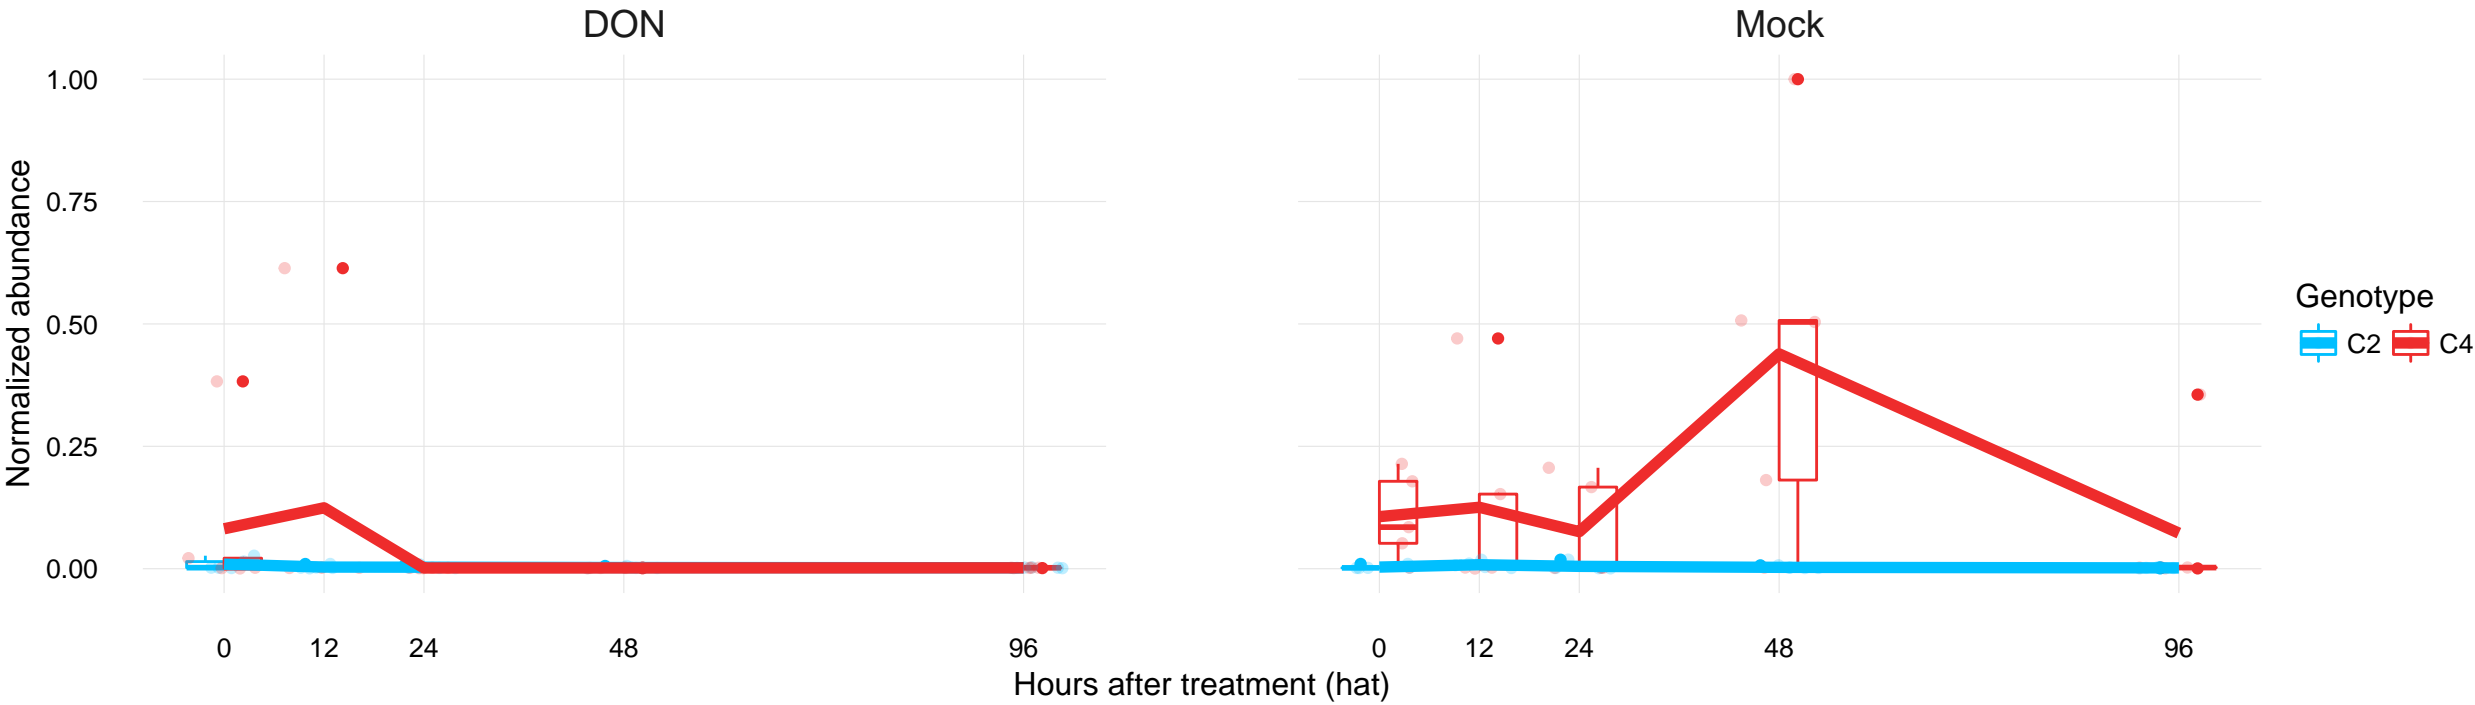

## CM, Remus; different treatments

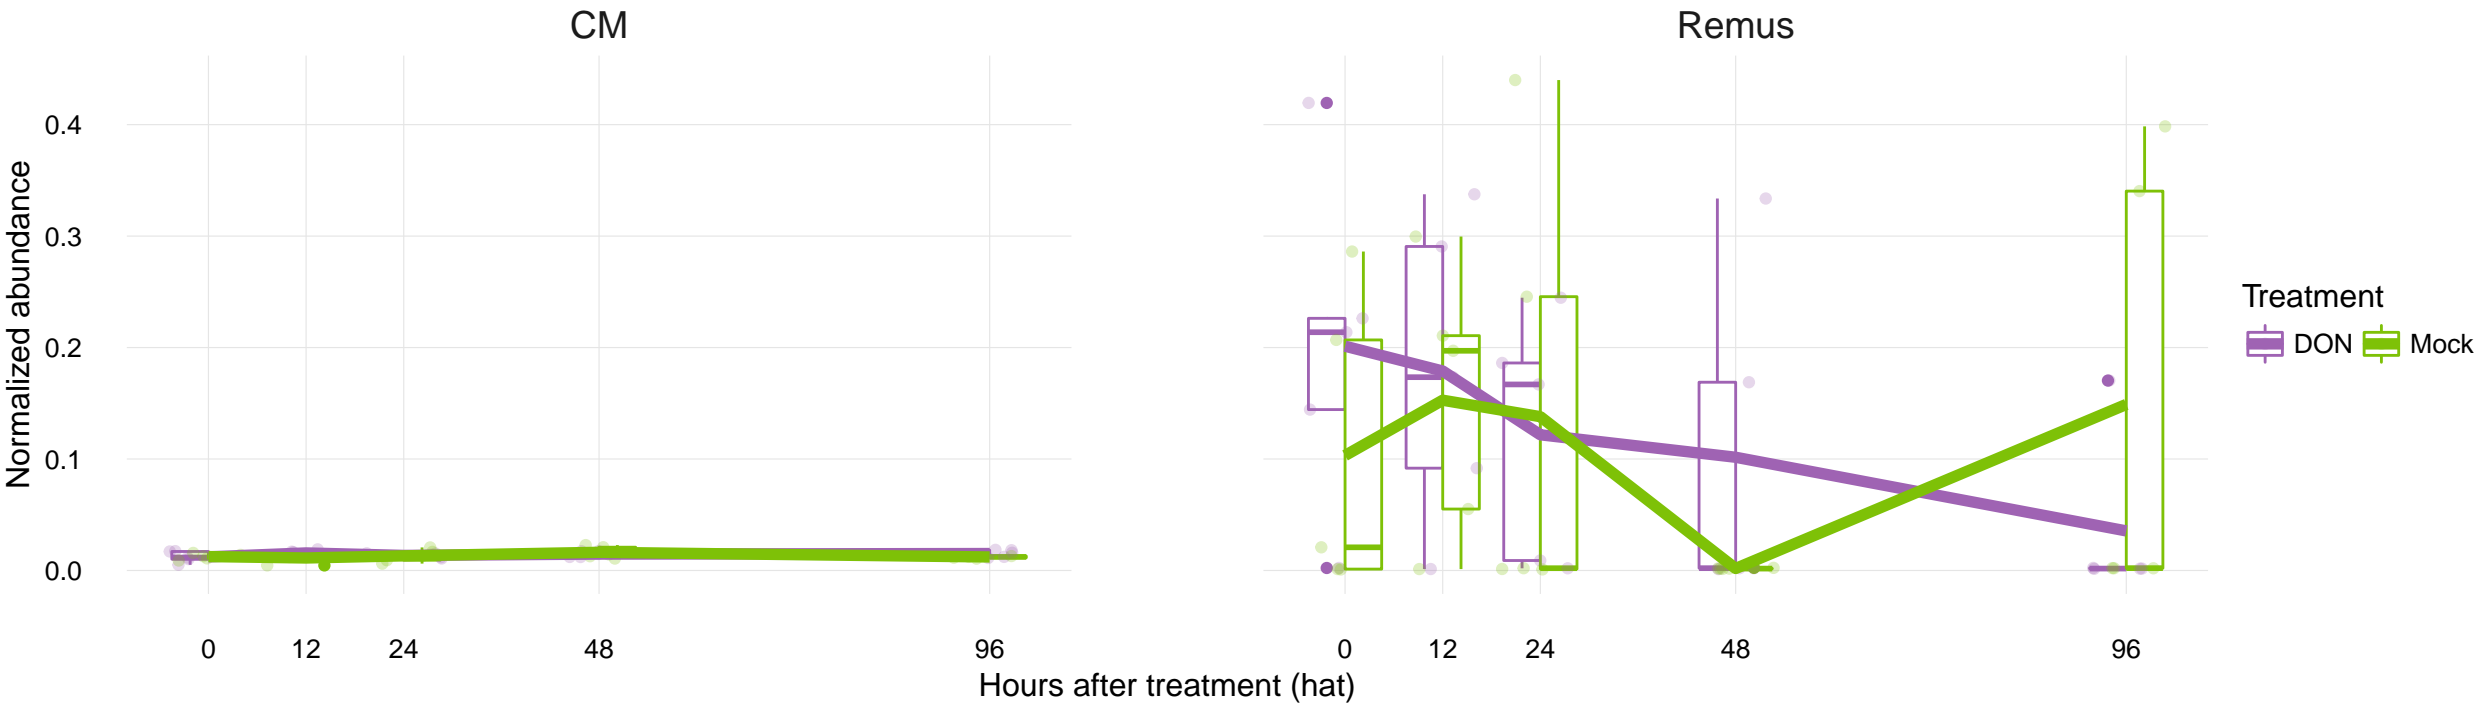

## DON, Mock; all four genotypes

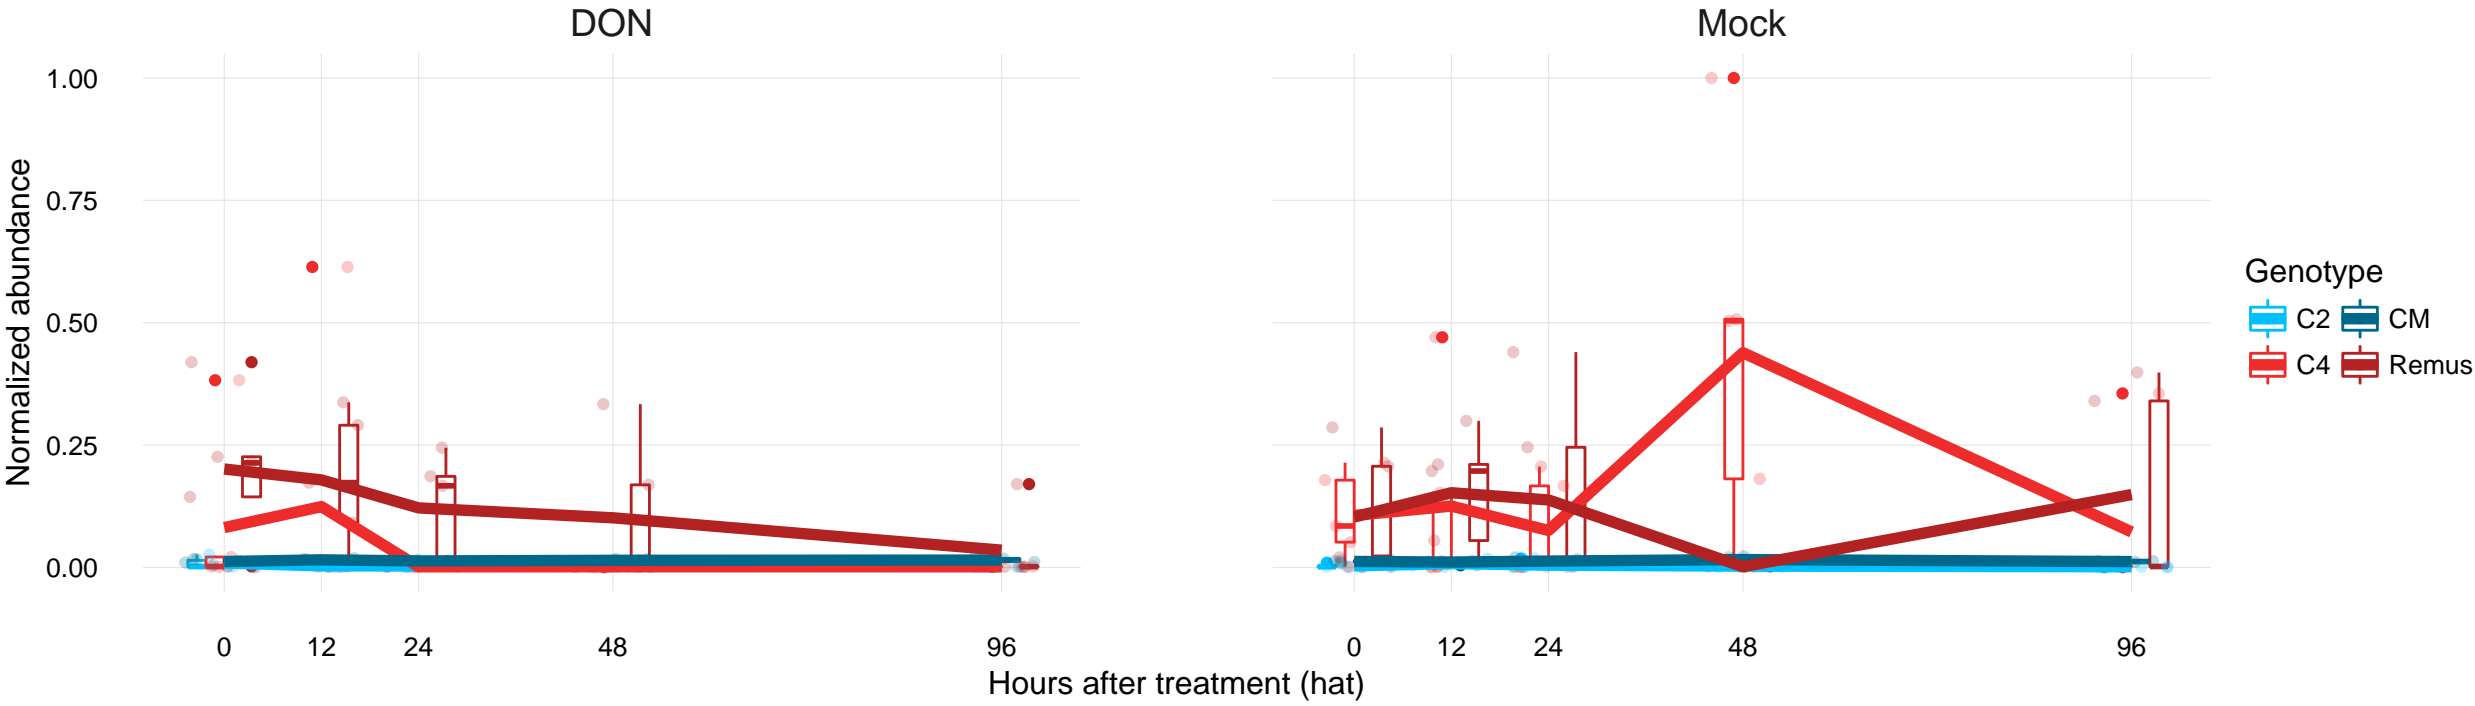

# A.89

Annotated as Flavonoid (GlcF)  
(68 database hits)

|                |                                                |
|----------------|------------------------------------------------|
| MZ             | 433.1131                                       |
| RT             | 15.33 min                                      |
| Normalization  | Indirectly via surrogate<br>in the KPX samples |
| Cluster        | –                                              |
| Cn total / Phe | 21 /                                           |

## C2, C4; different treatments

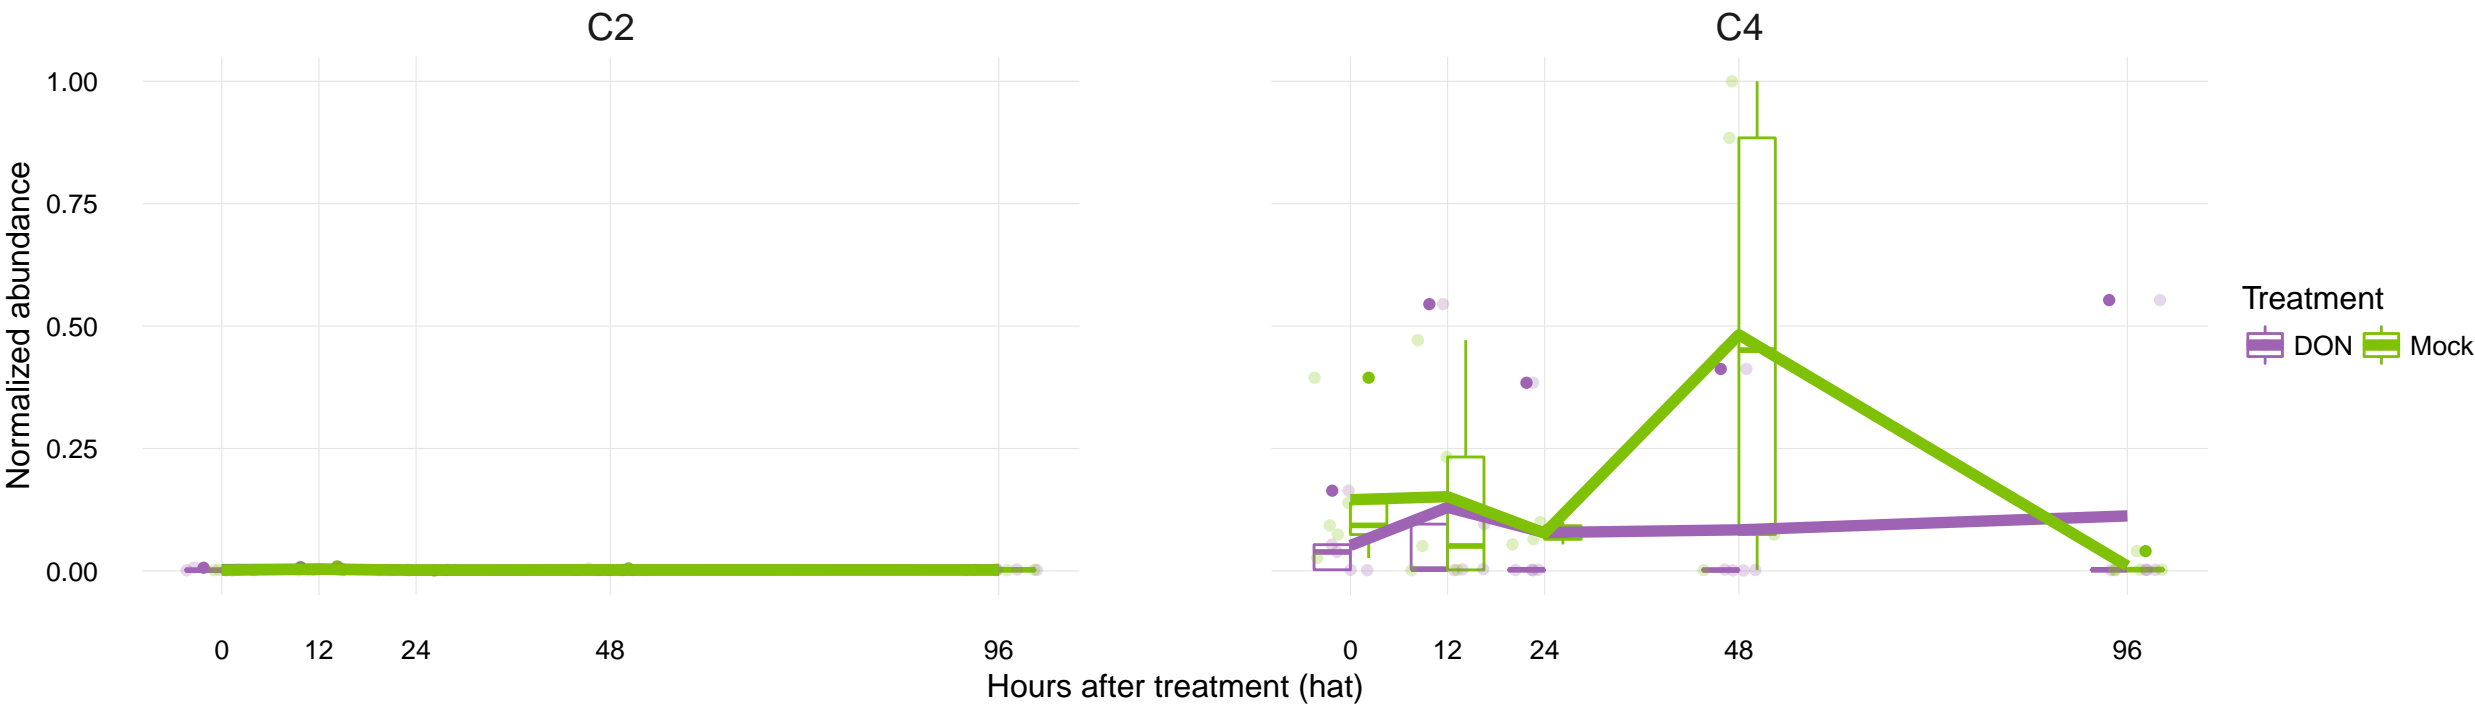

## DON, Mock; different genotypes

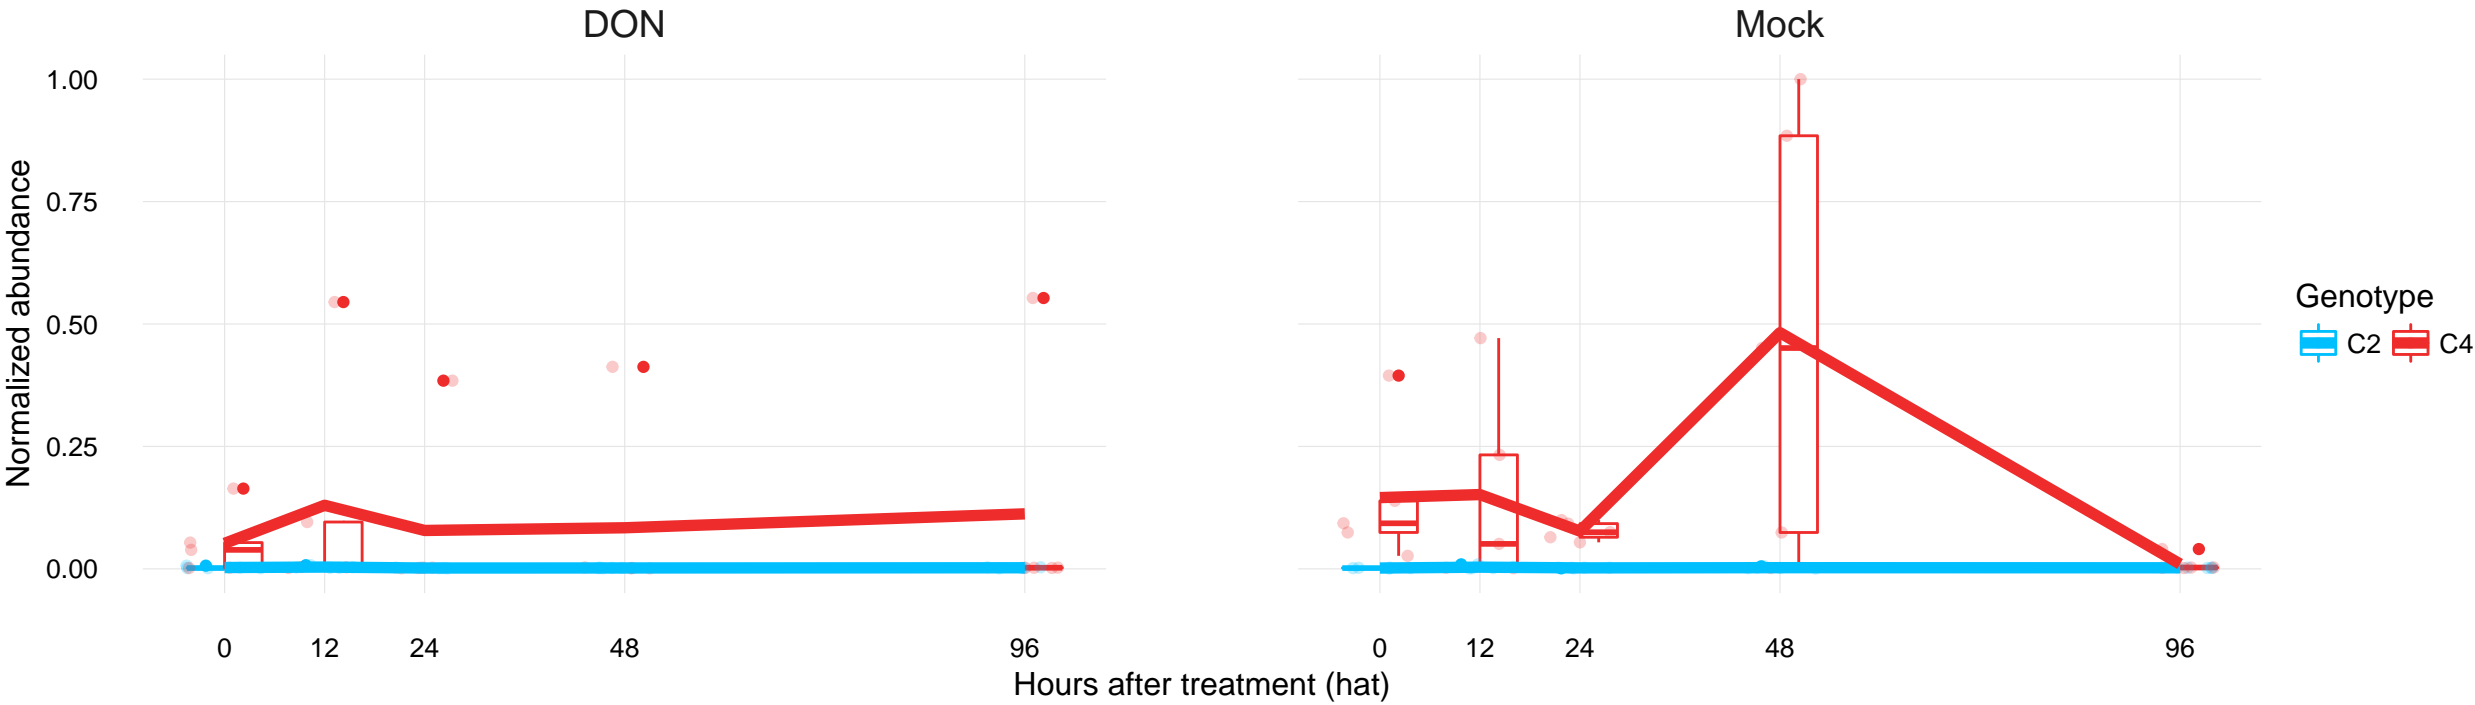

## CM, Remus; different treatments

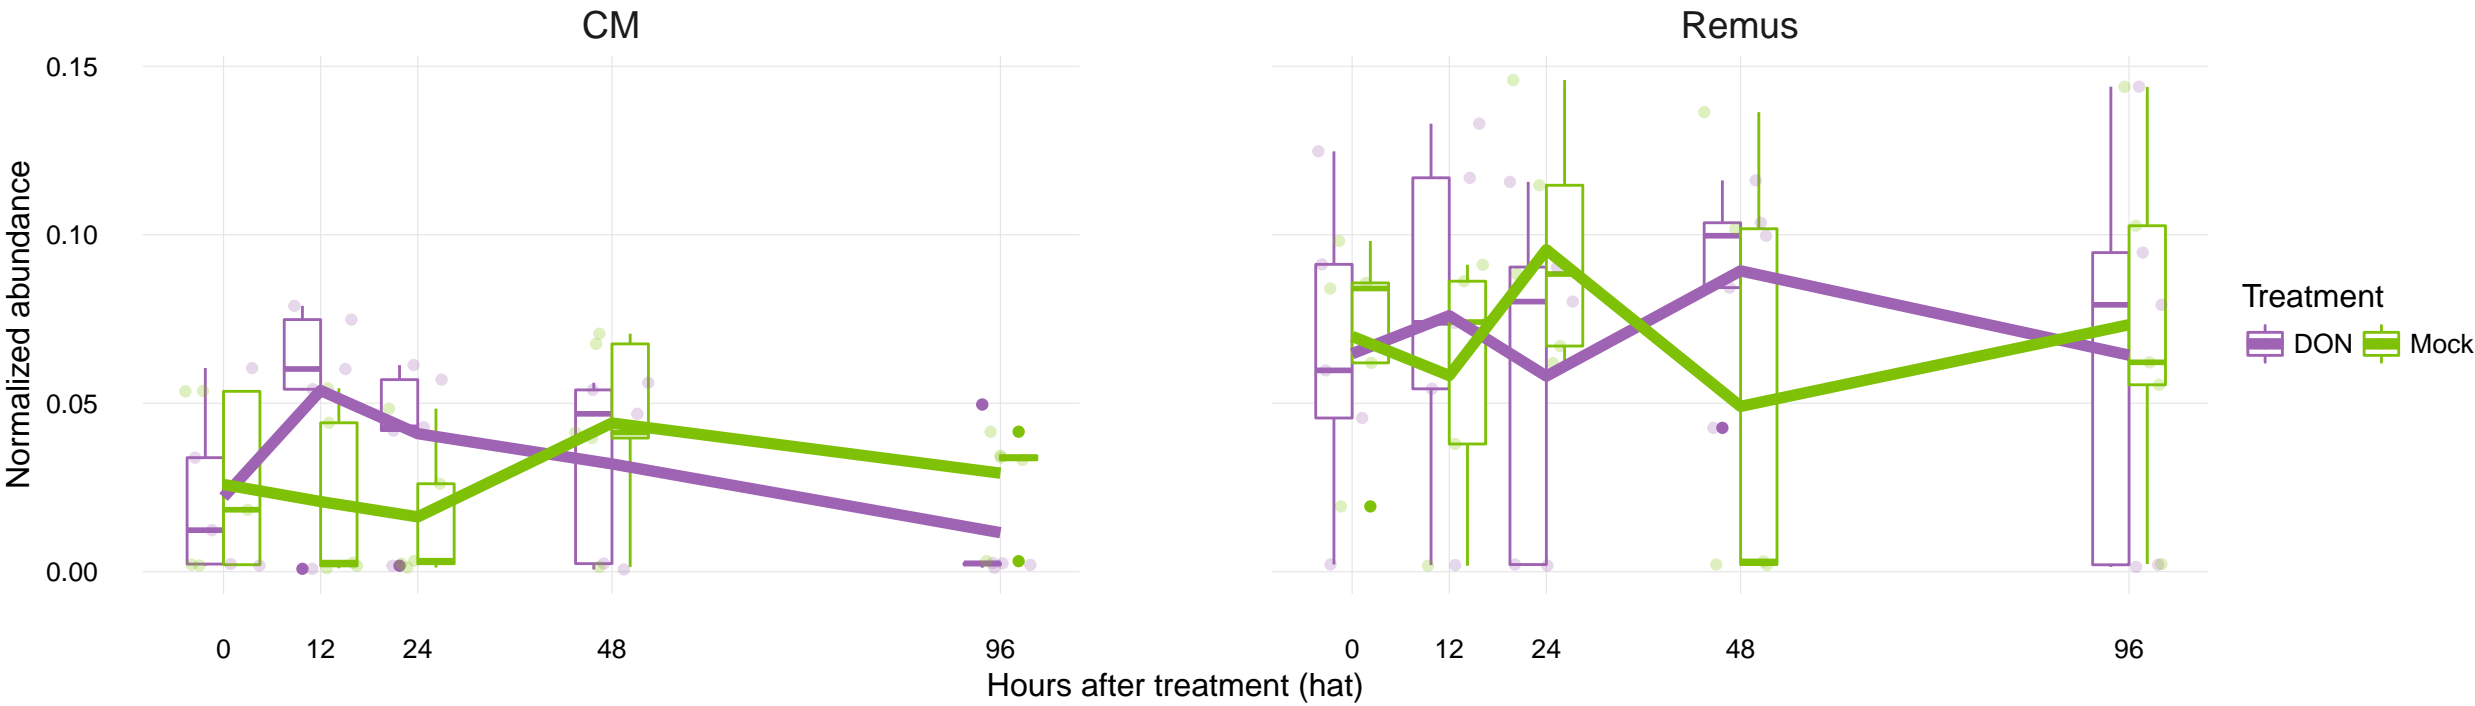

## DON, Mock; all four genotypes

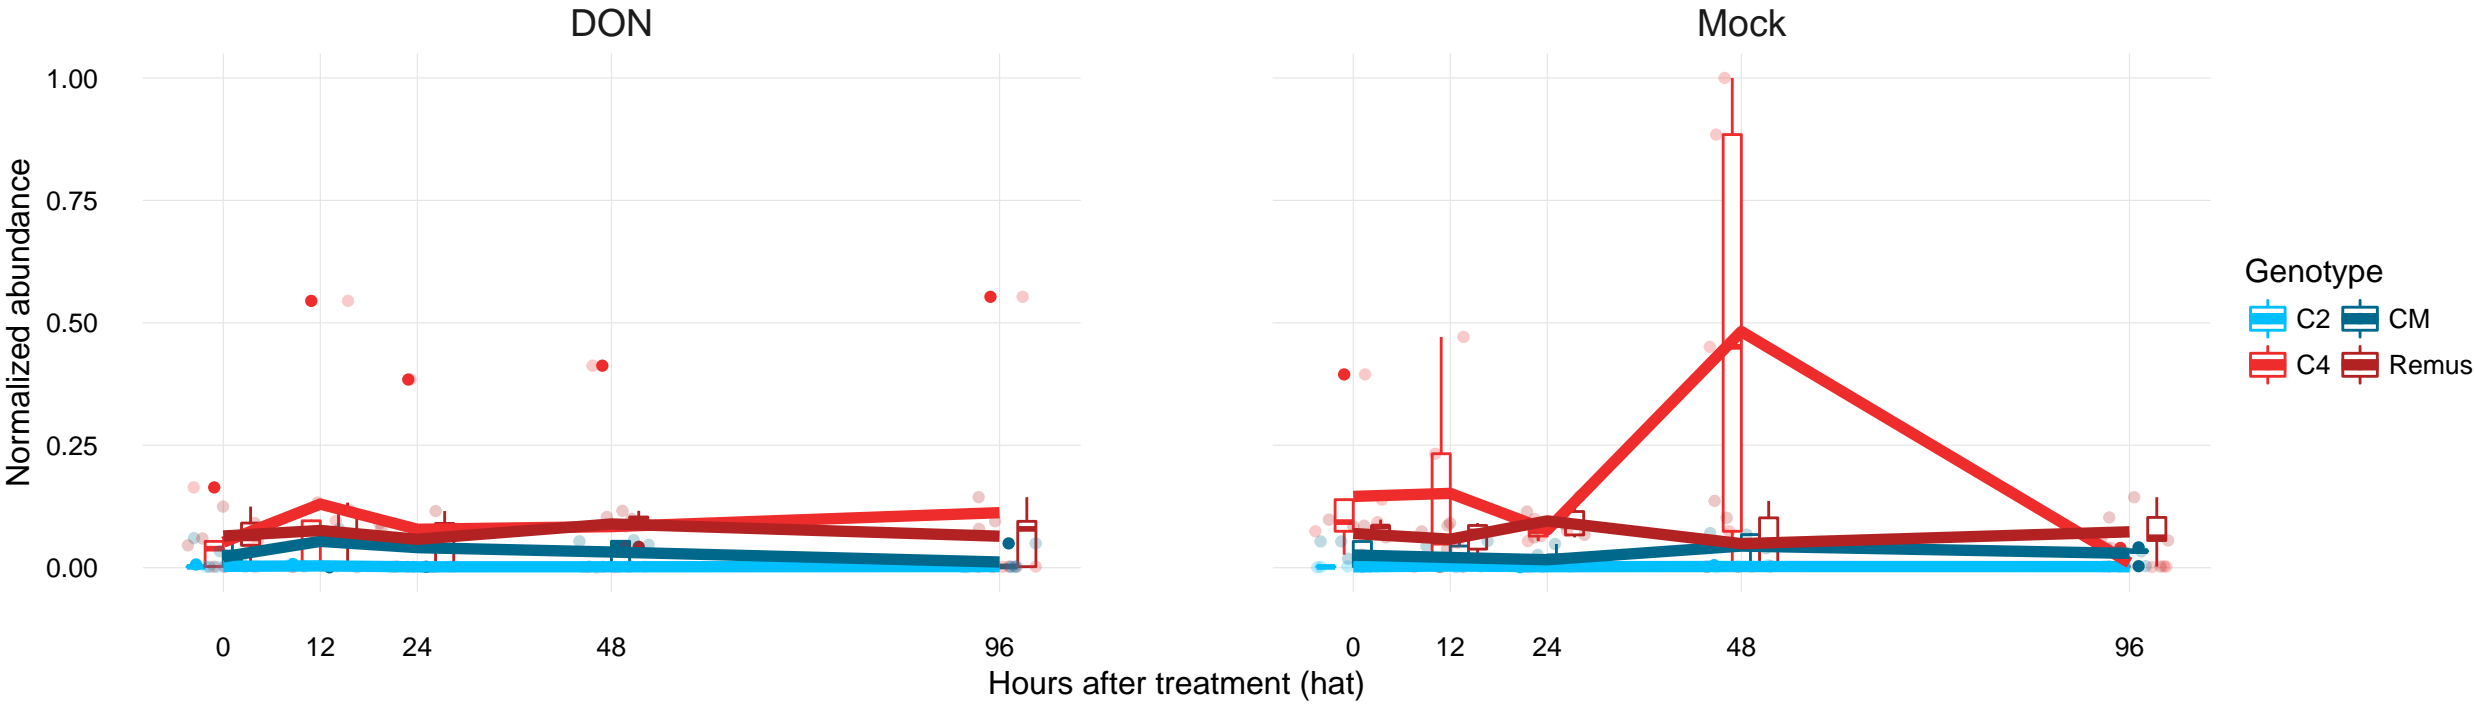



# FerTam

Identified metabolite (level 1)

|                |                                             |
|----------------|---------------------------------------------|
| MZ             | 337.1548                                    |
| RT             | 20.97 min                                   |
| Normalization  | Indirectly via surrogate in the KPX samples |
| Cluster        | Cluster 1B                                  |
| Cn total / Phe | 20 / 9                                      |

C2, C4; different treatments

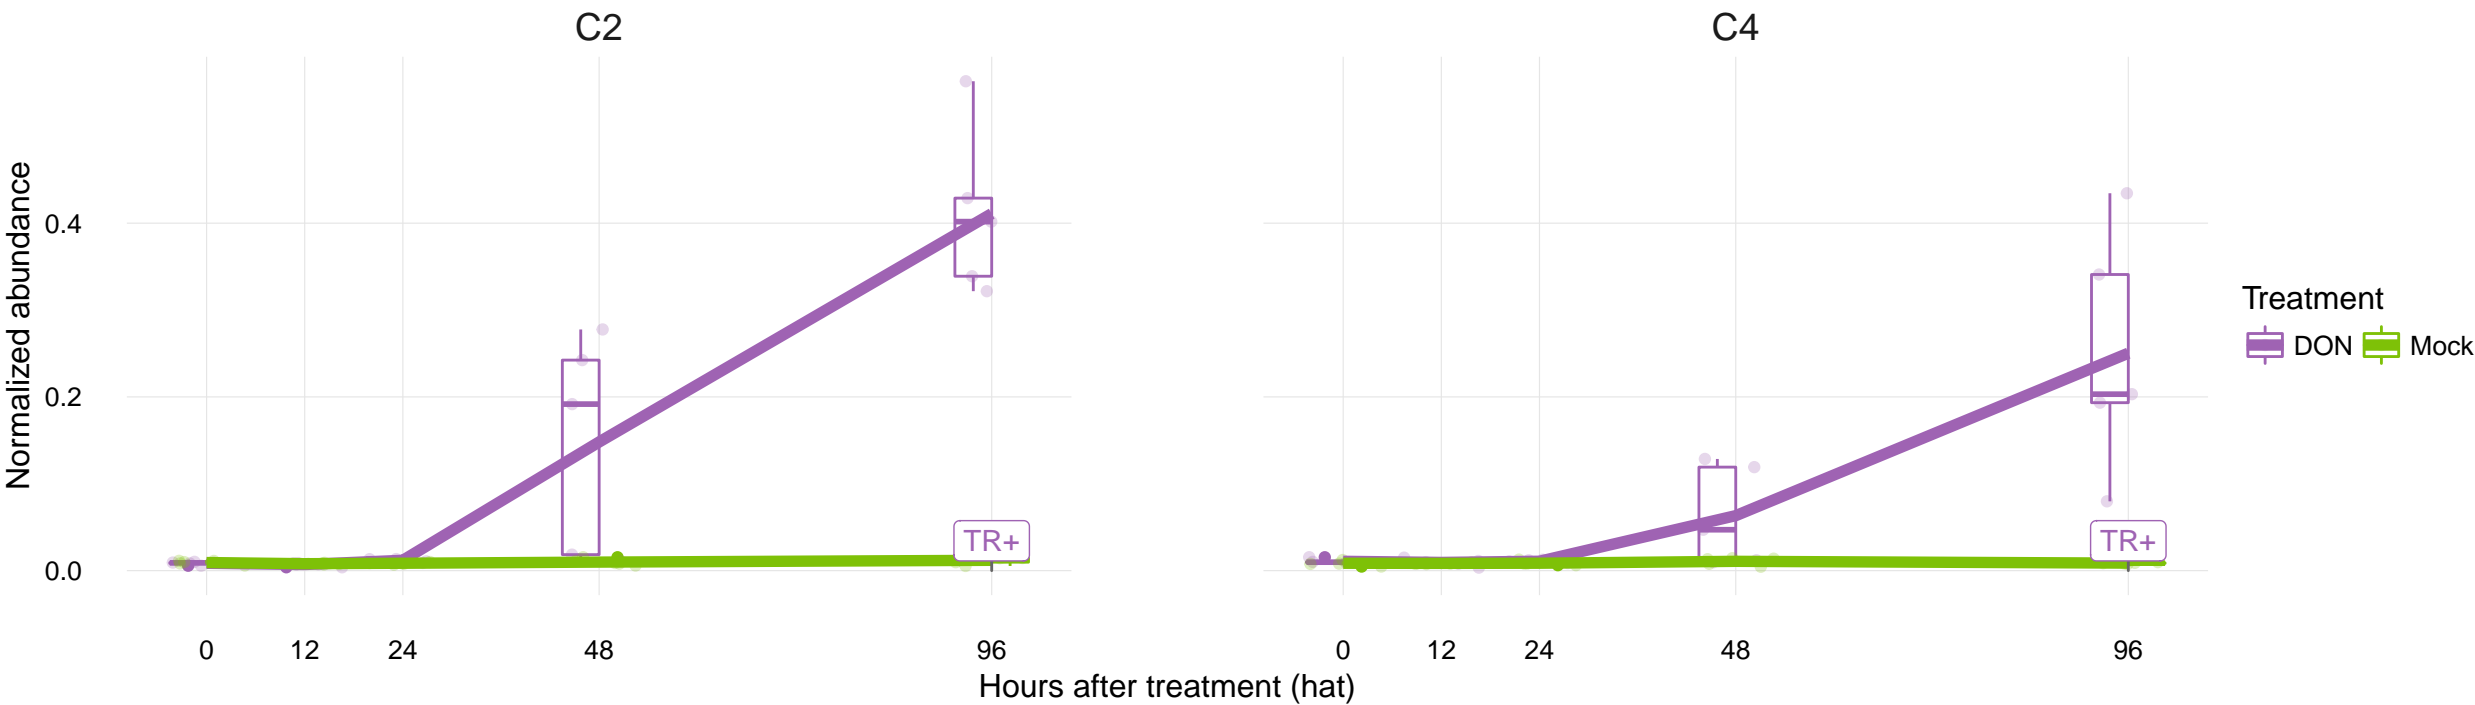

DON, Mock; different genotypes

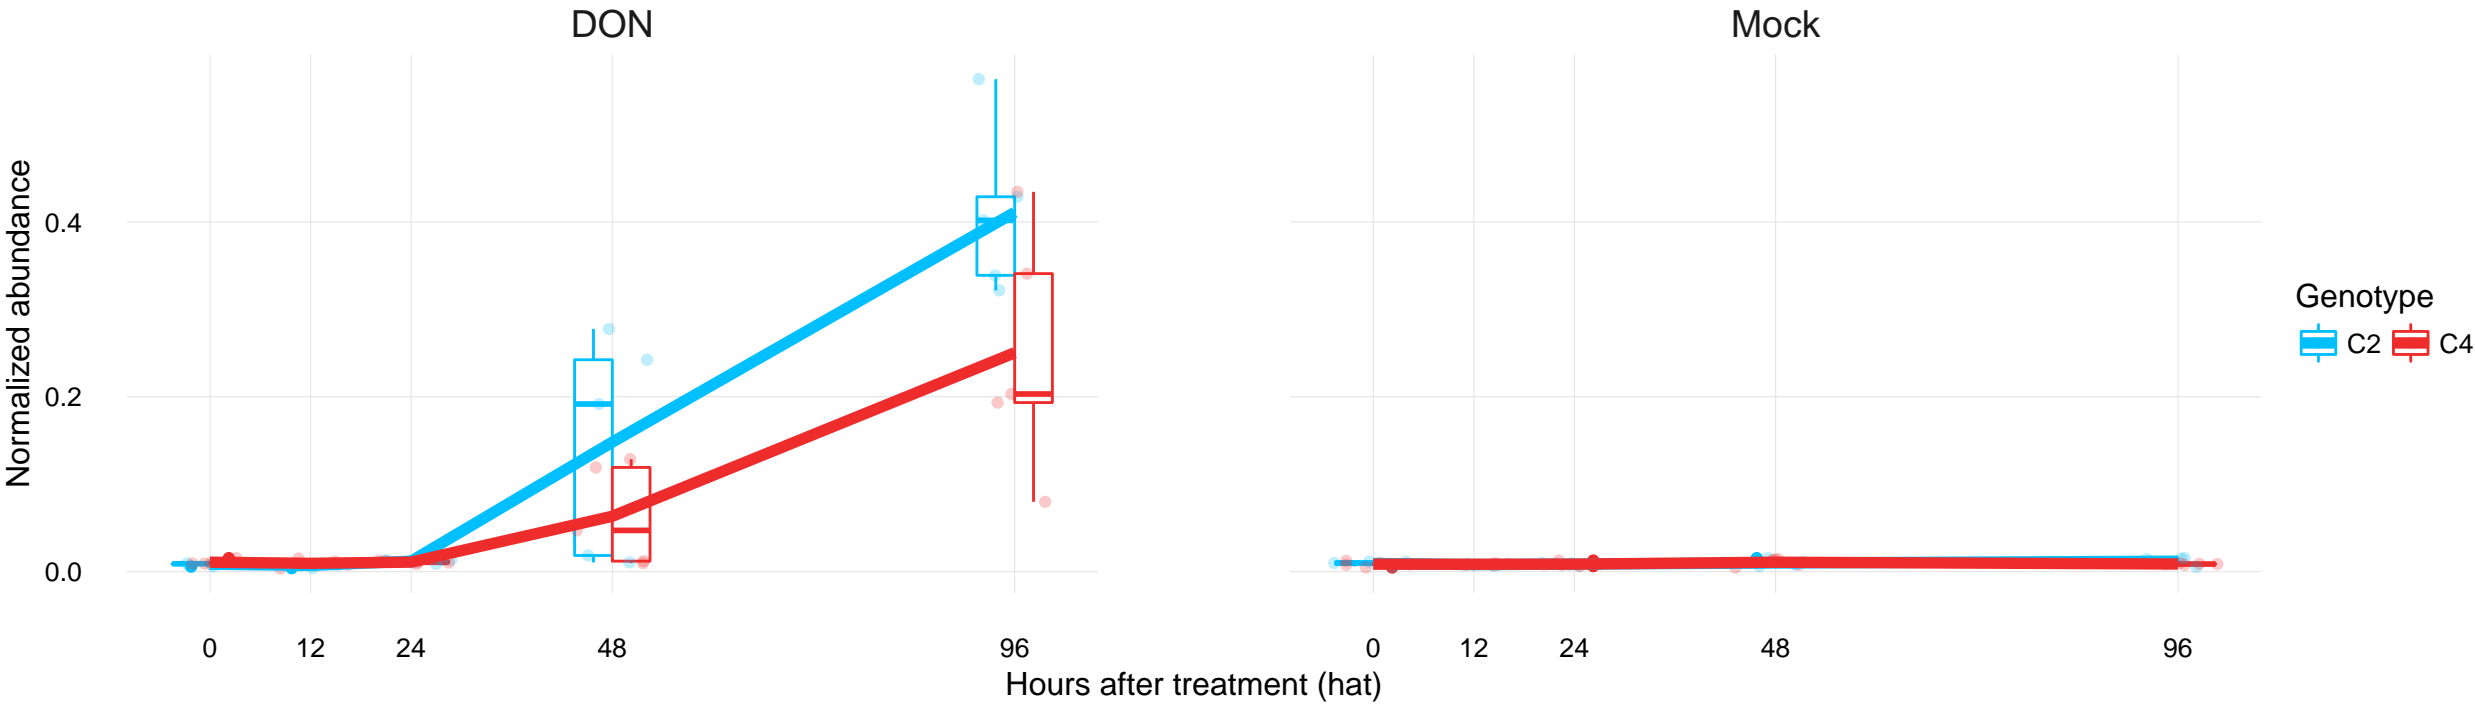

CM, Remus; different treatments

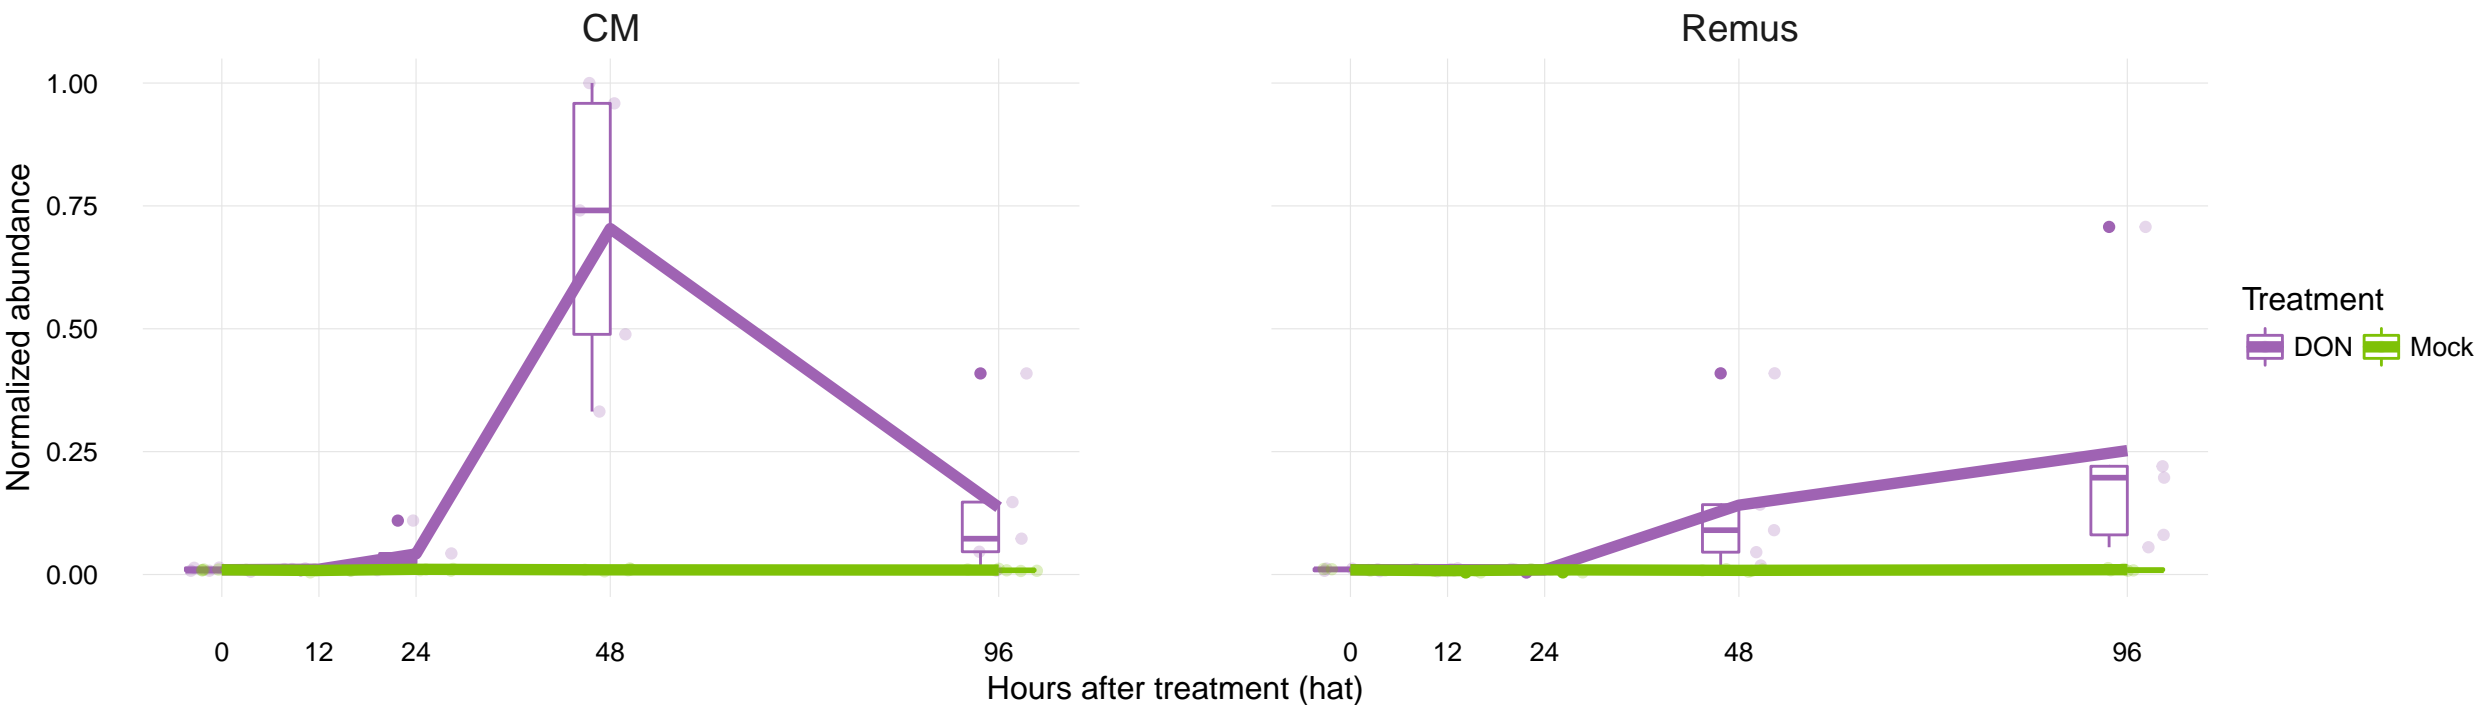

DON, Mock; all four genotypes

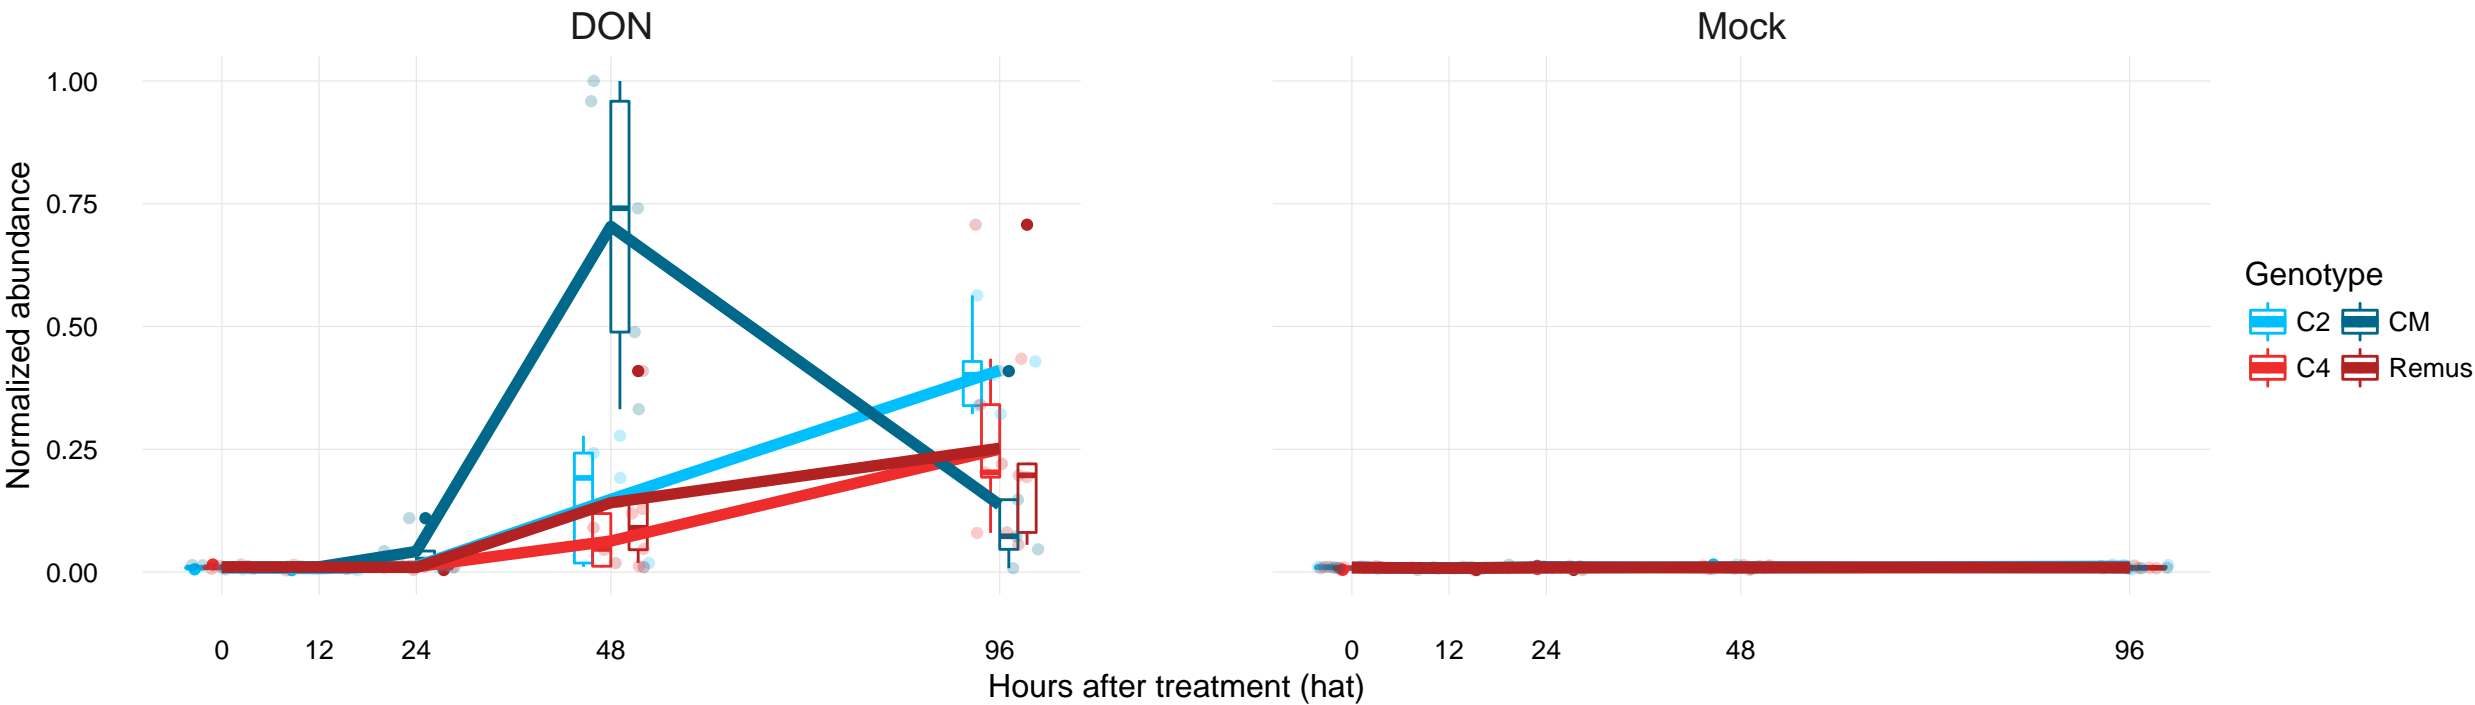

# A.24

Annotated as others (dipeptide)  
(1 database hit)

|                |                          |
|----------------|--------------------------|
| MZ             | 265.1554                 |
| RT             | 8.75 min                 |
| Normalization  | Directly via KPX samples |
| Cluster        | Cluster 1B               |
| Cn total / Phe | 9 / 9                    |

## C2, C4; different treatments

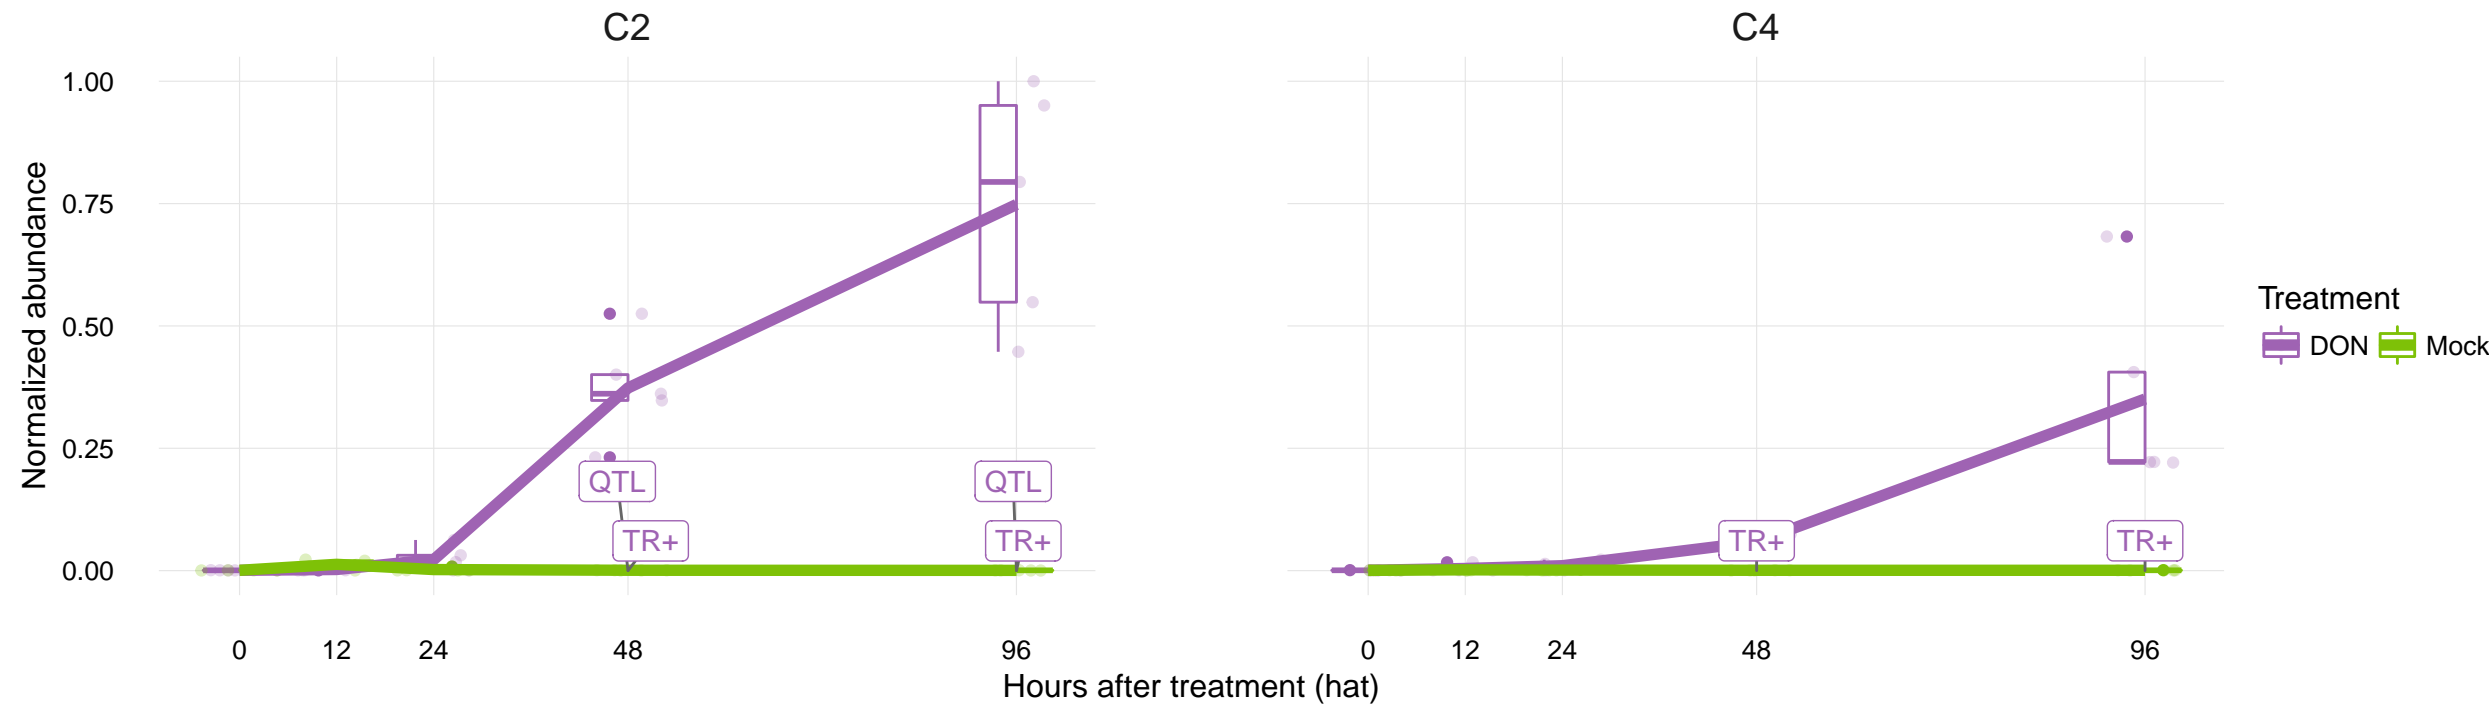

## DON, Mock; different genotypes

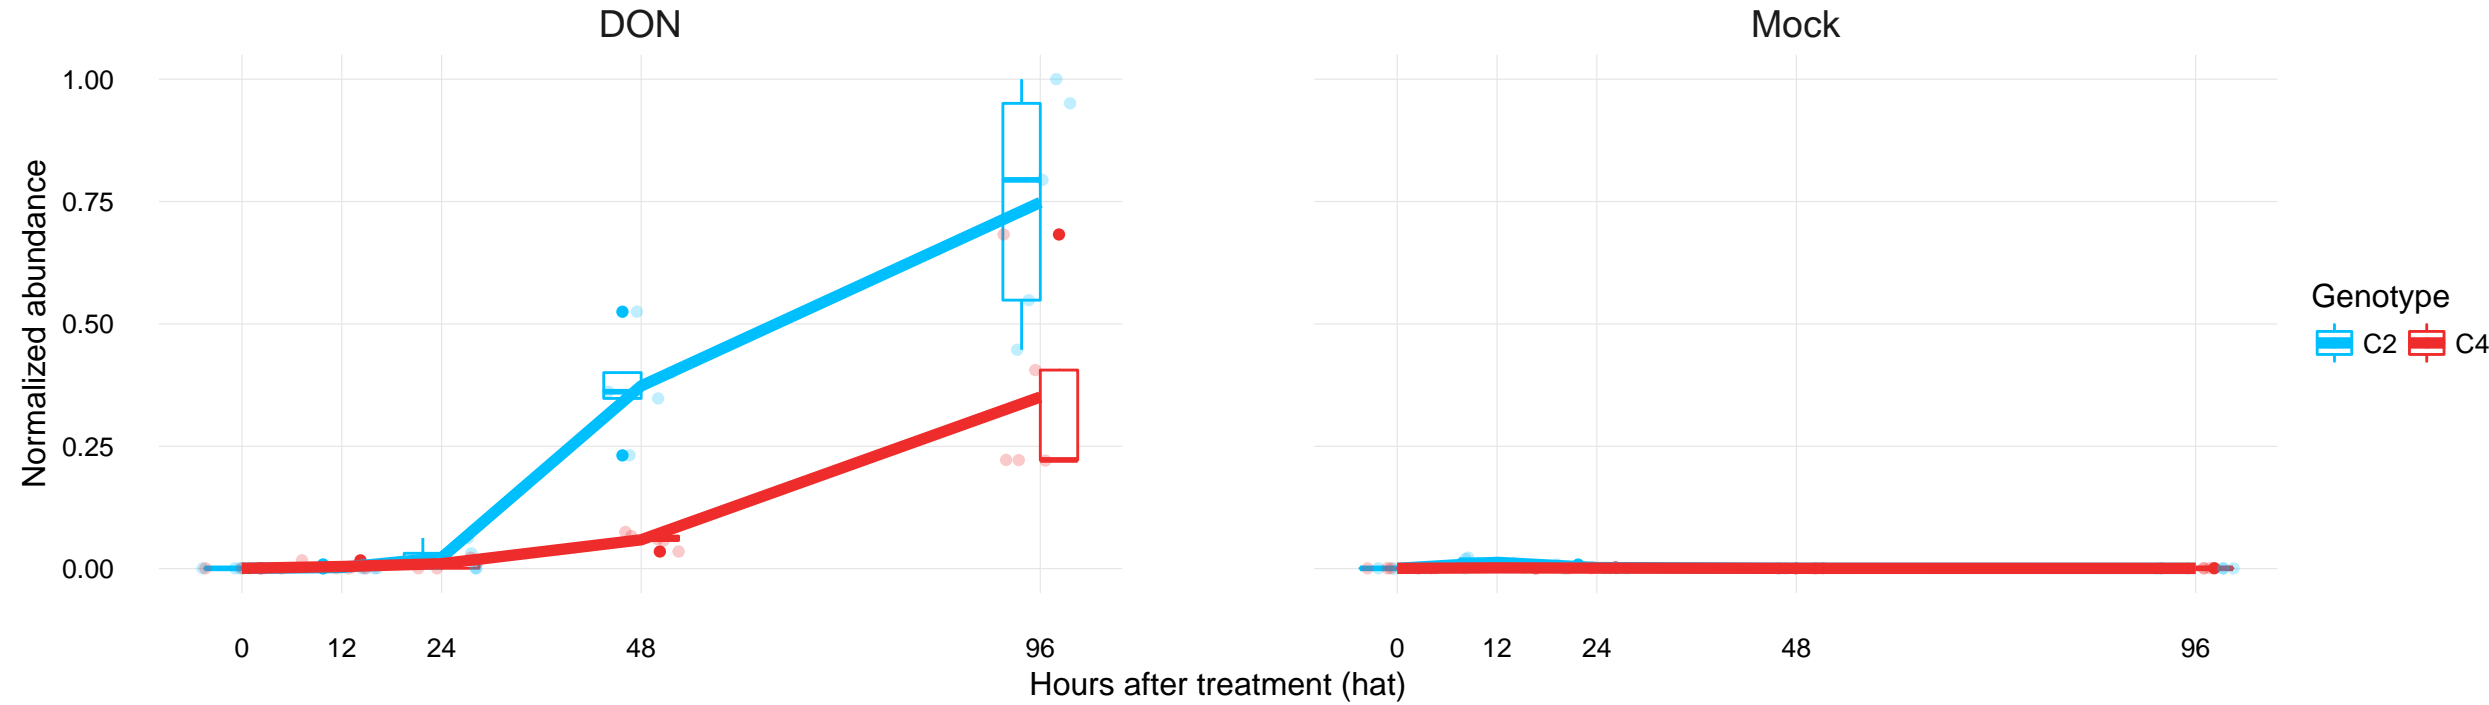

## CM, Remus; different treatments

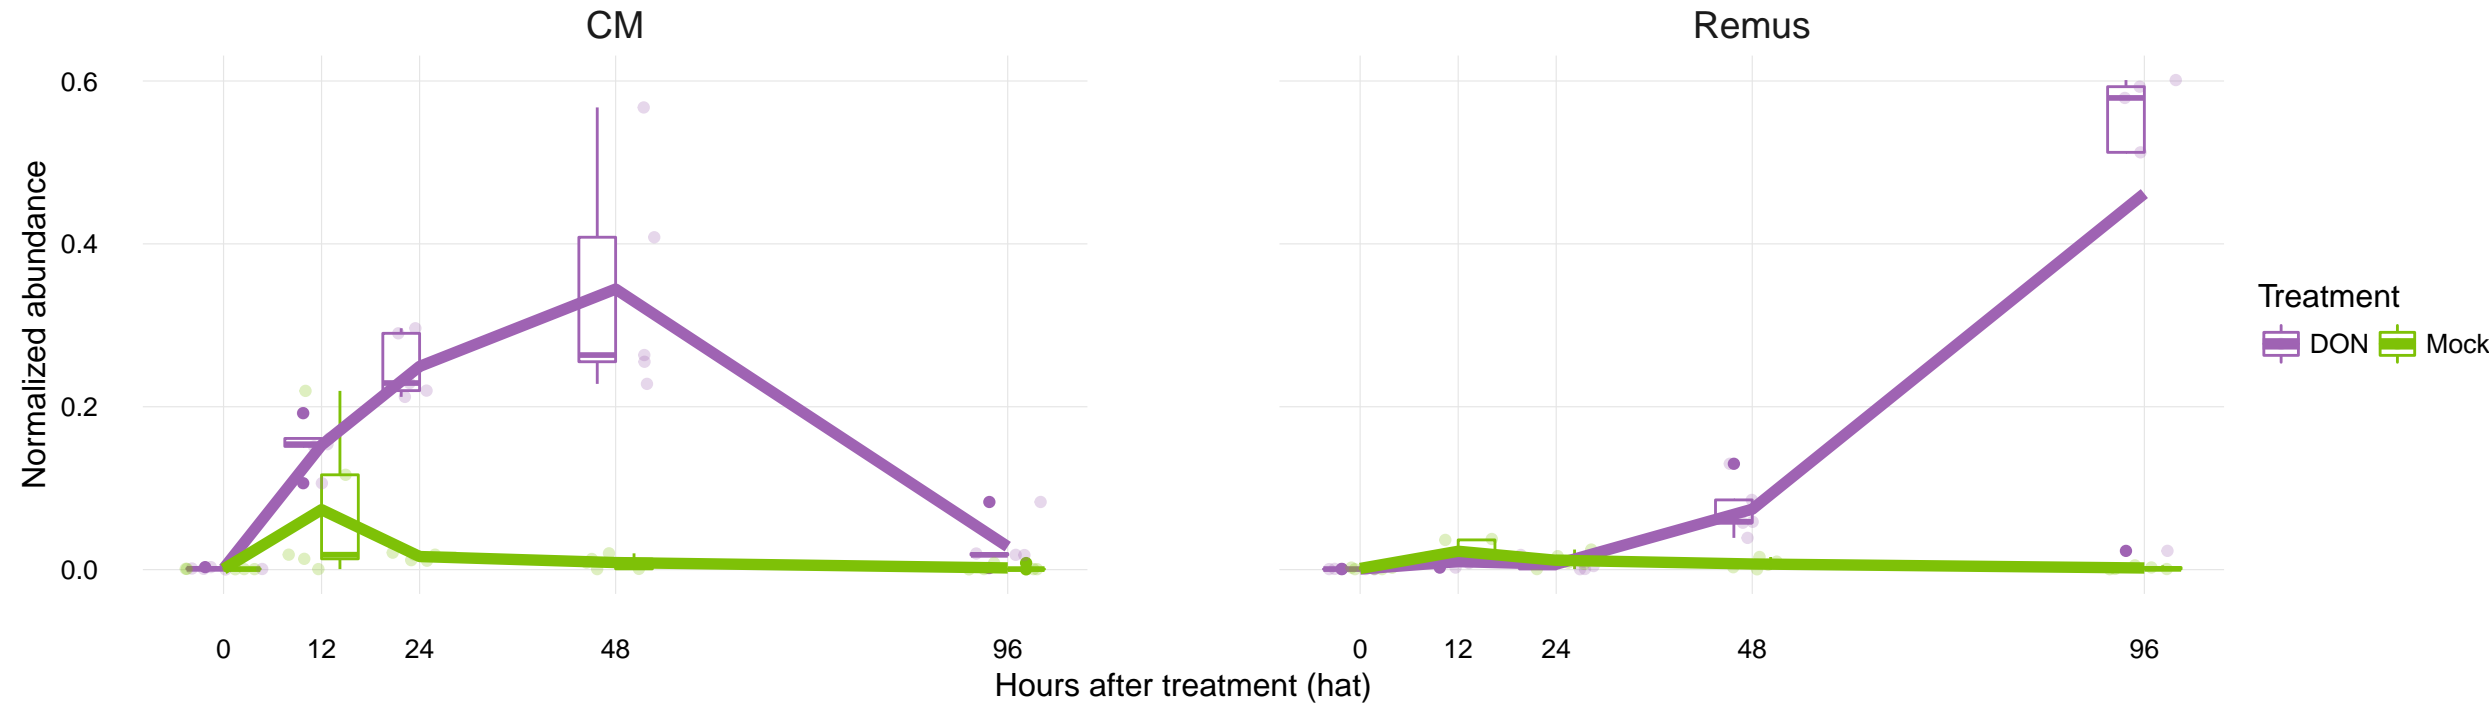

## DON, Mock; all four genotypes

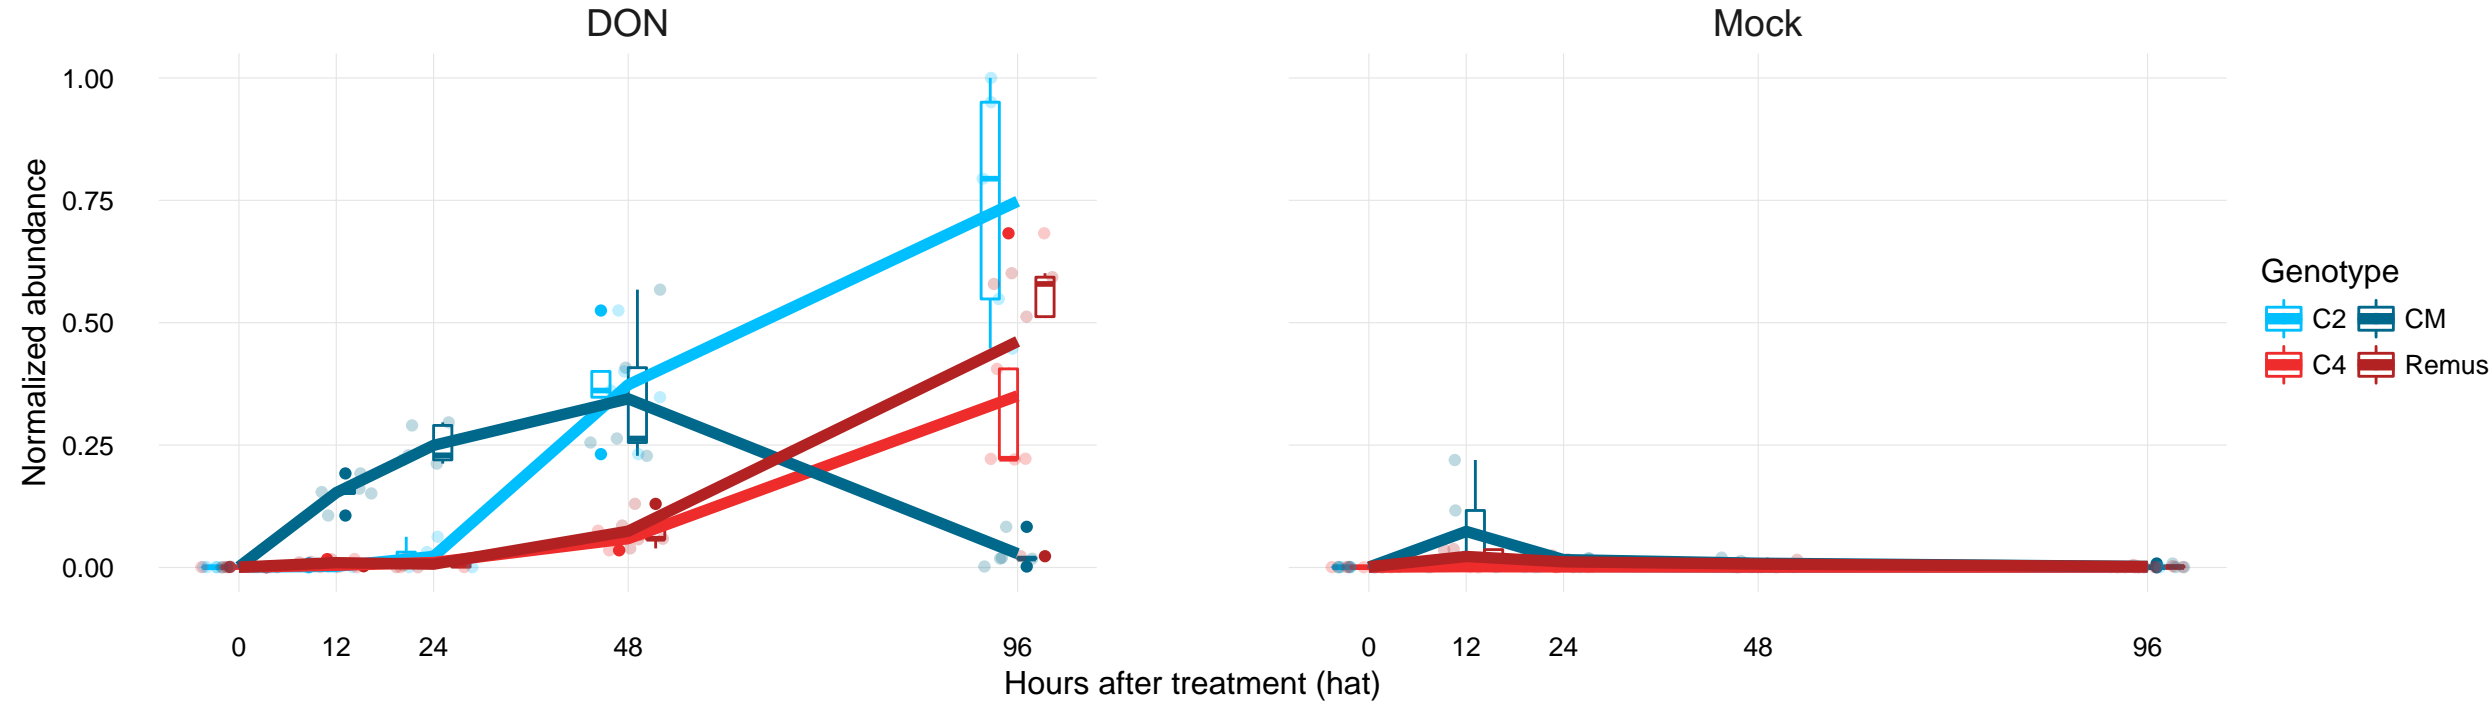

# A.41

Annotated as HCA derivative  
(1 database hit)

|                |                          |
|----------------|--------------------------|
| MZ             | 335.1106                 |
| RT             | 10.43 min                |
| Normalization  | Directly via KPX samples |
| Cluster        | Cluster 1B               |
| Cn total / Phe | 15 /                     |

## C2, C4; different treatments

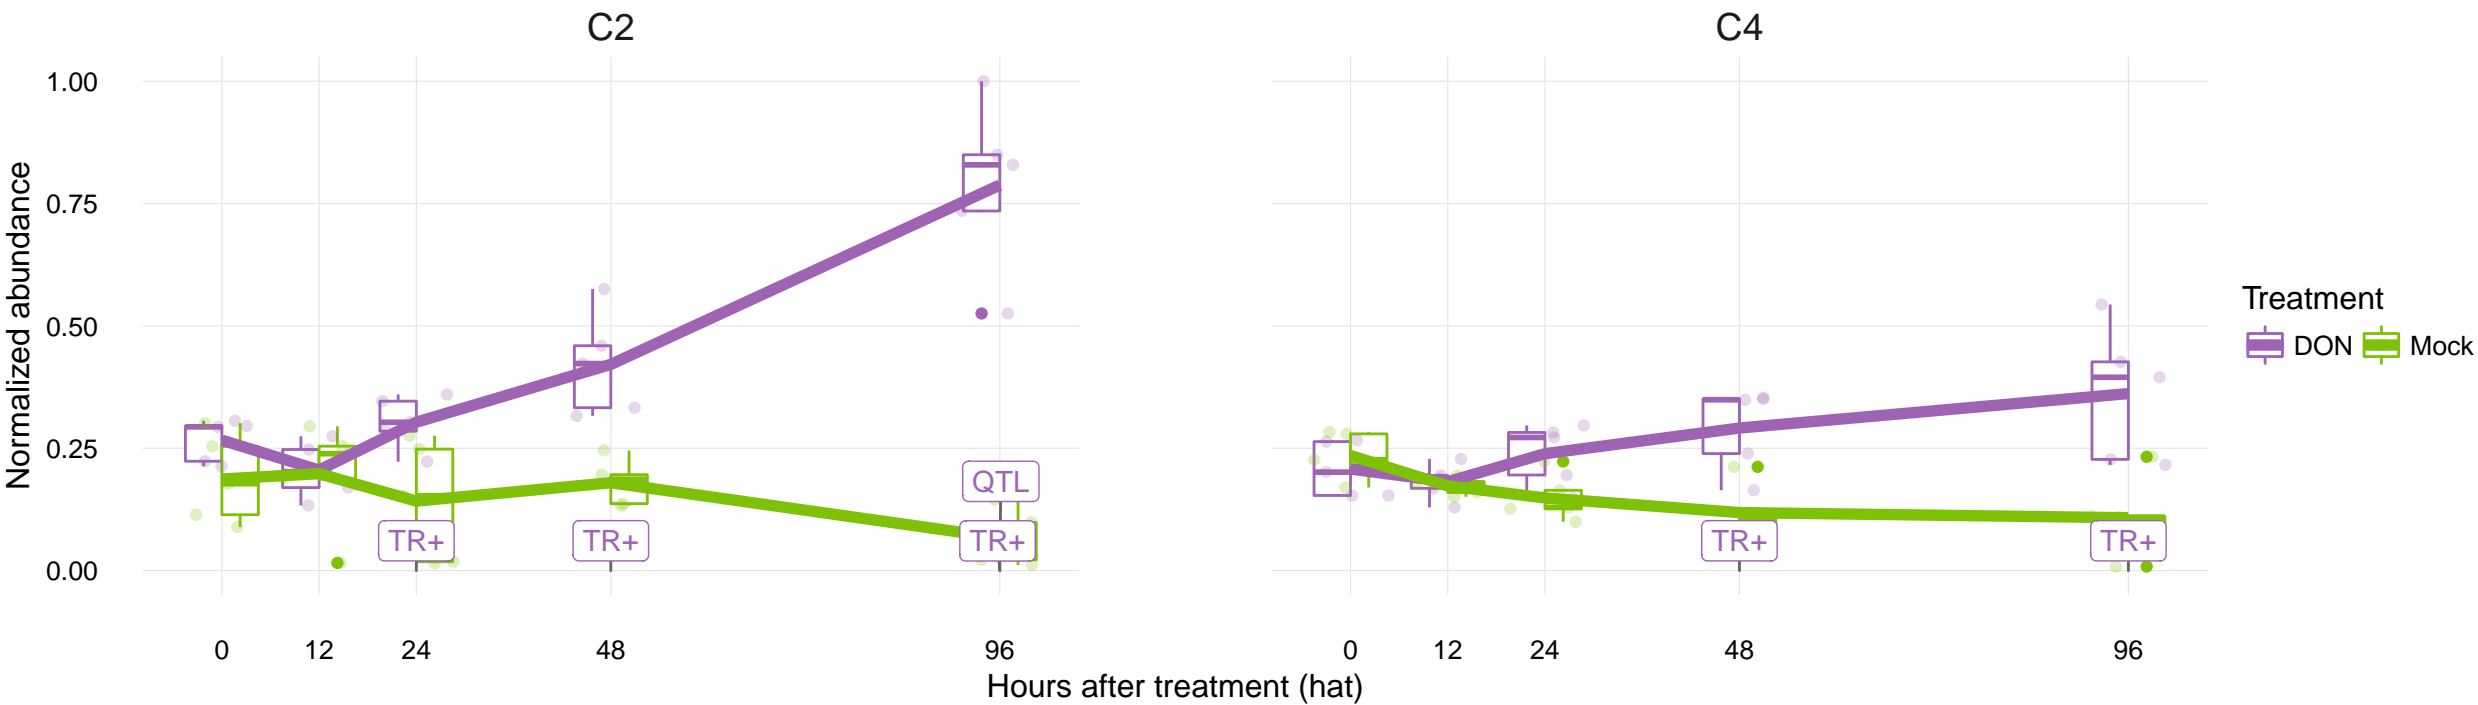

## DON, Mock; different genotypes

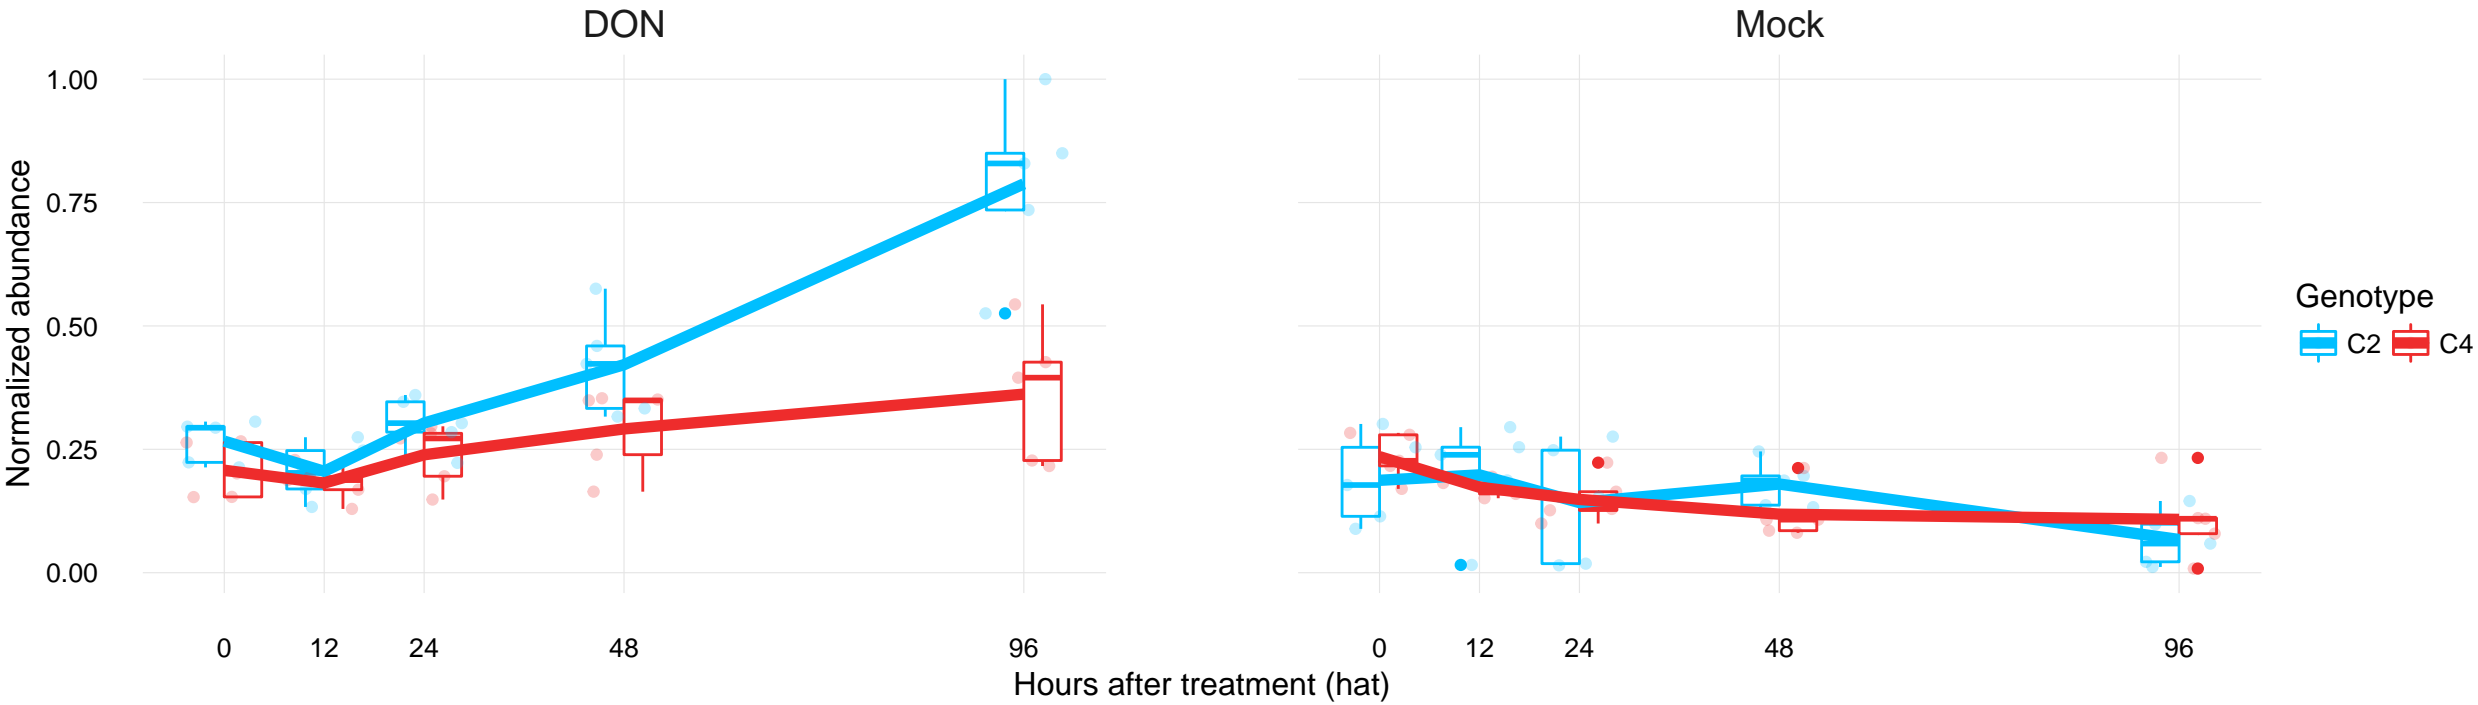

## CM, Remus; different treatments

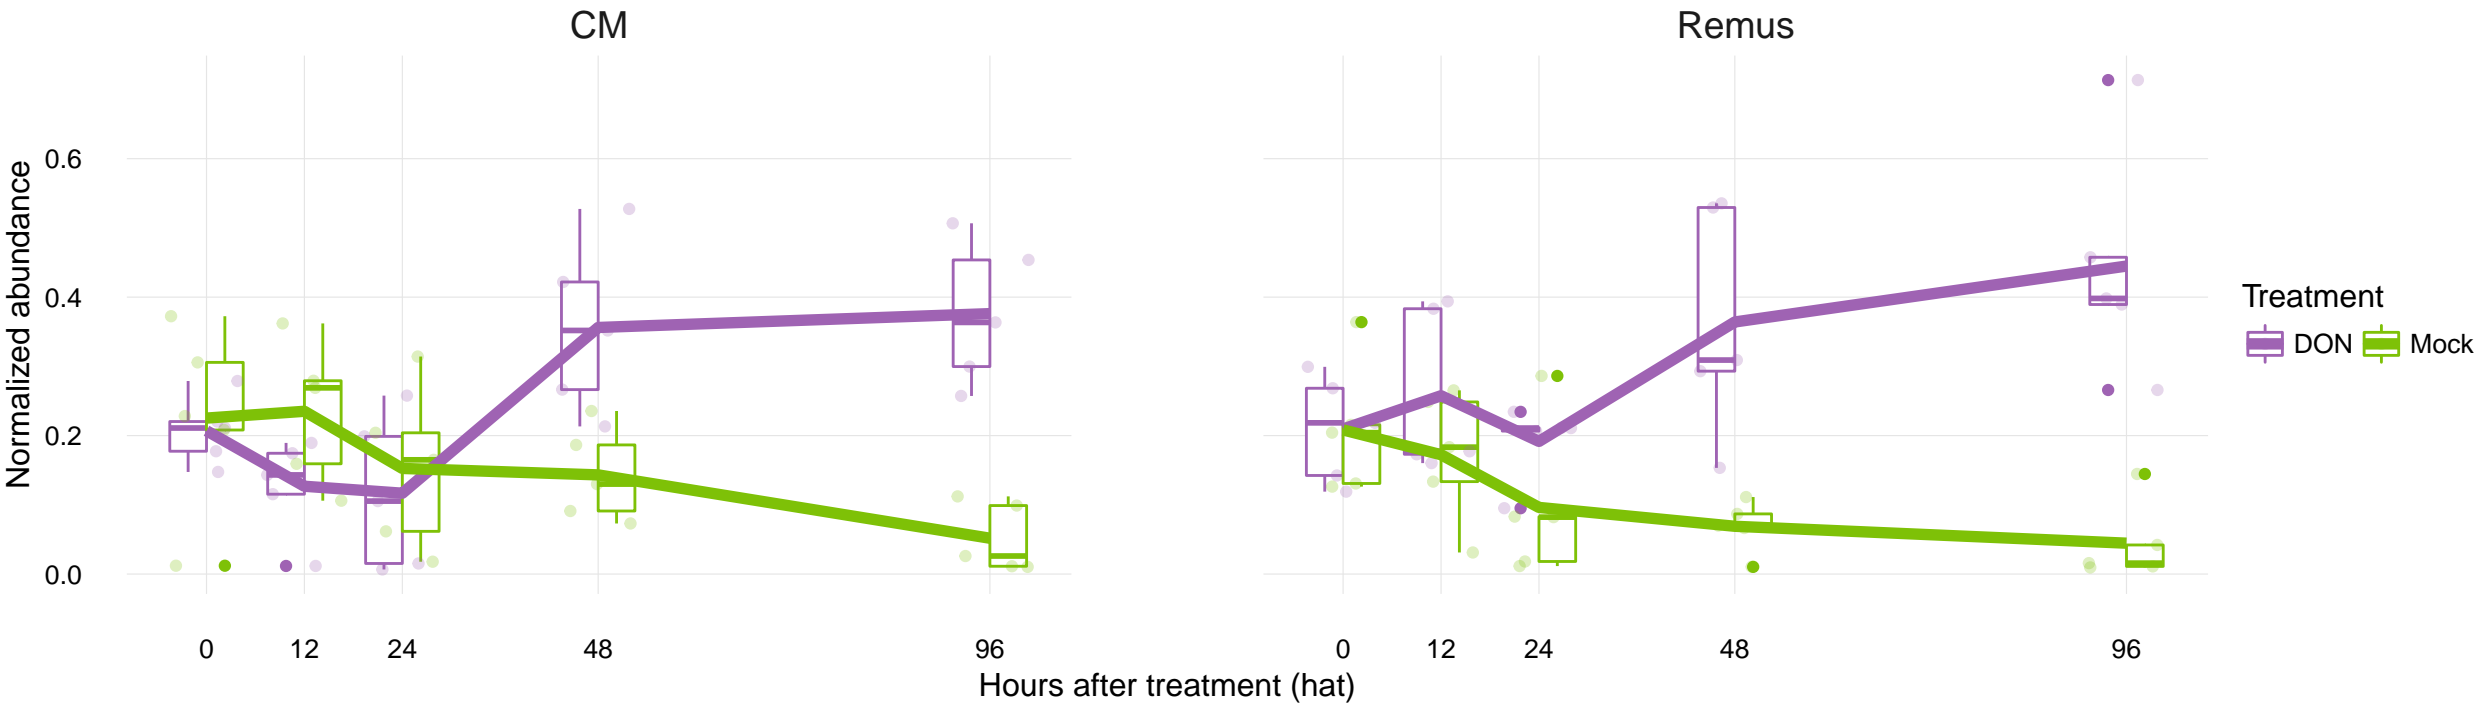

## DON, Mock; all four genotypes

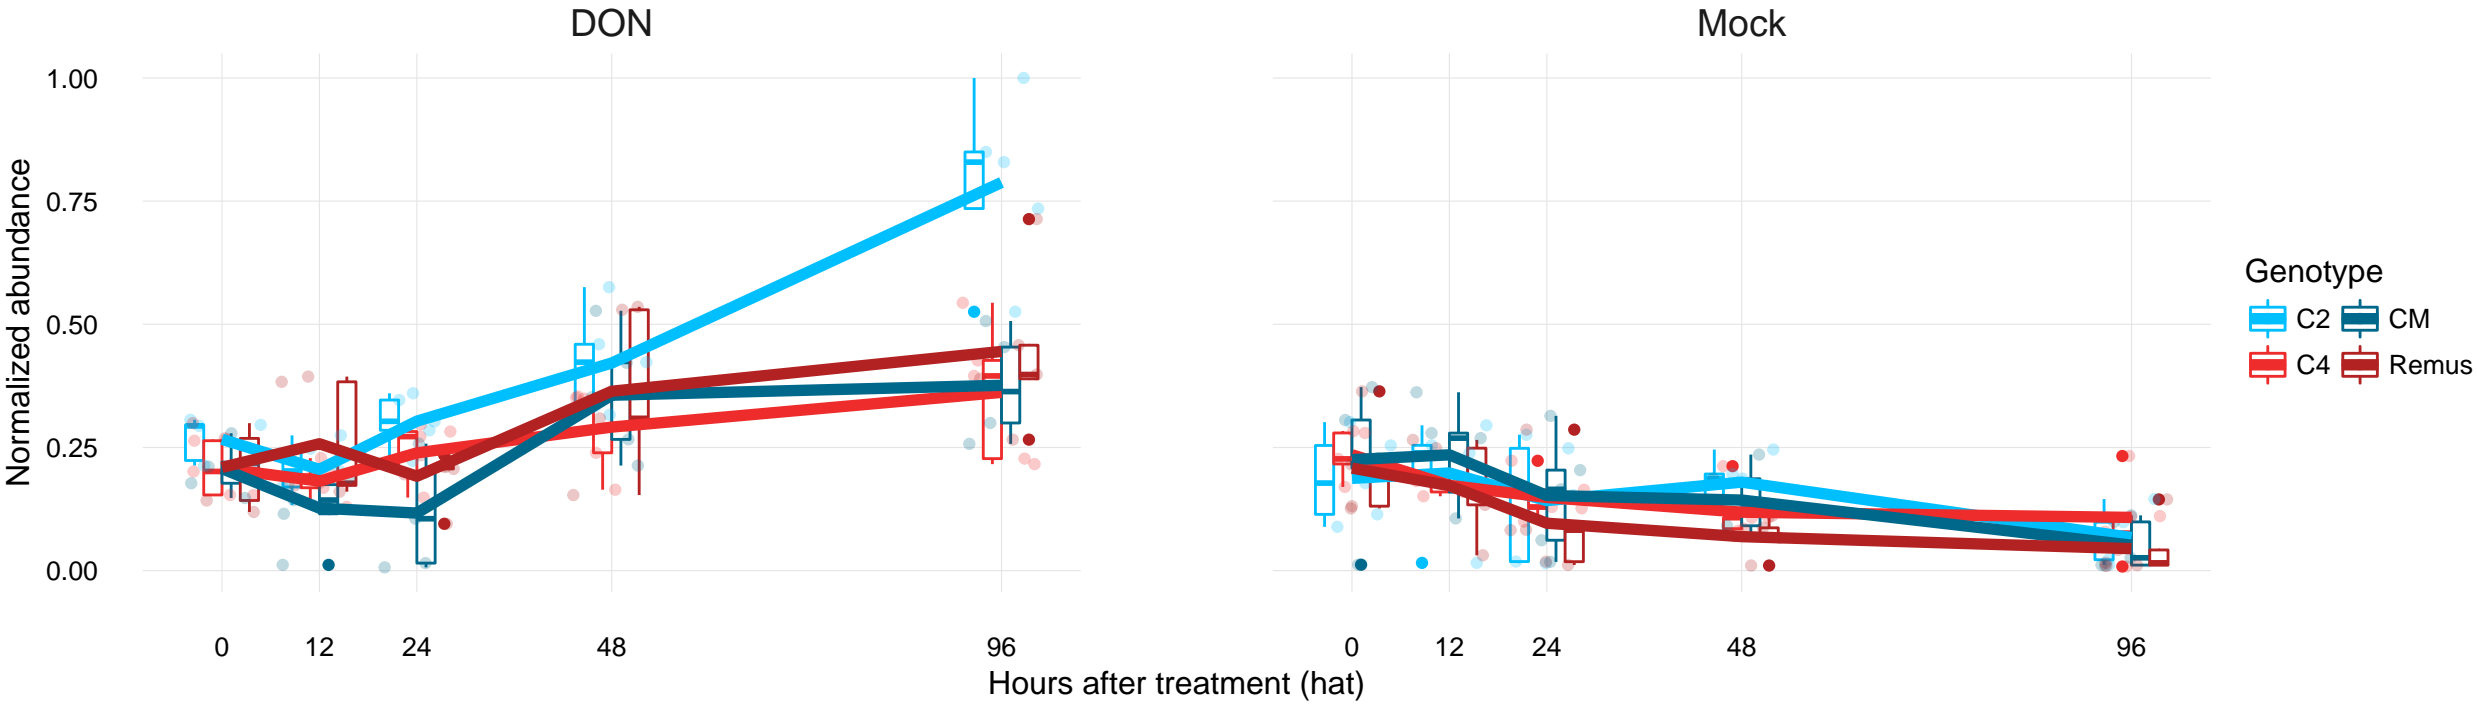

# A.134

Annotated as HCA derivative  
(1 database hit)

|                |                          |
|----------------|--------------------------|
| MZ             | 557.1654                 |
| RT             | 21.51 min                |
| Normalization  | Directly via KPX samples |
| Cluster        | Cluster 1B               |
| Cn total / Phe | 28 / 18                  |

## C2, C4; different treatments

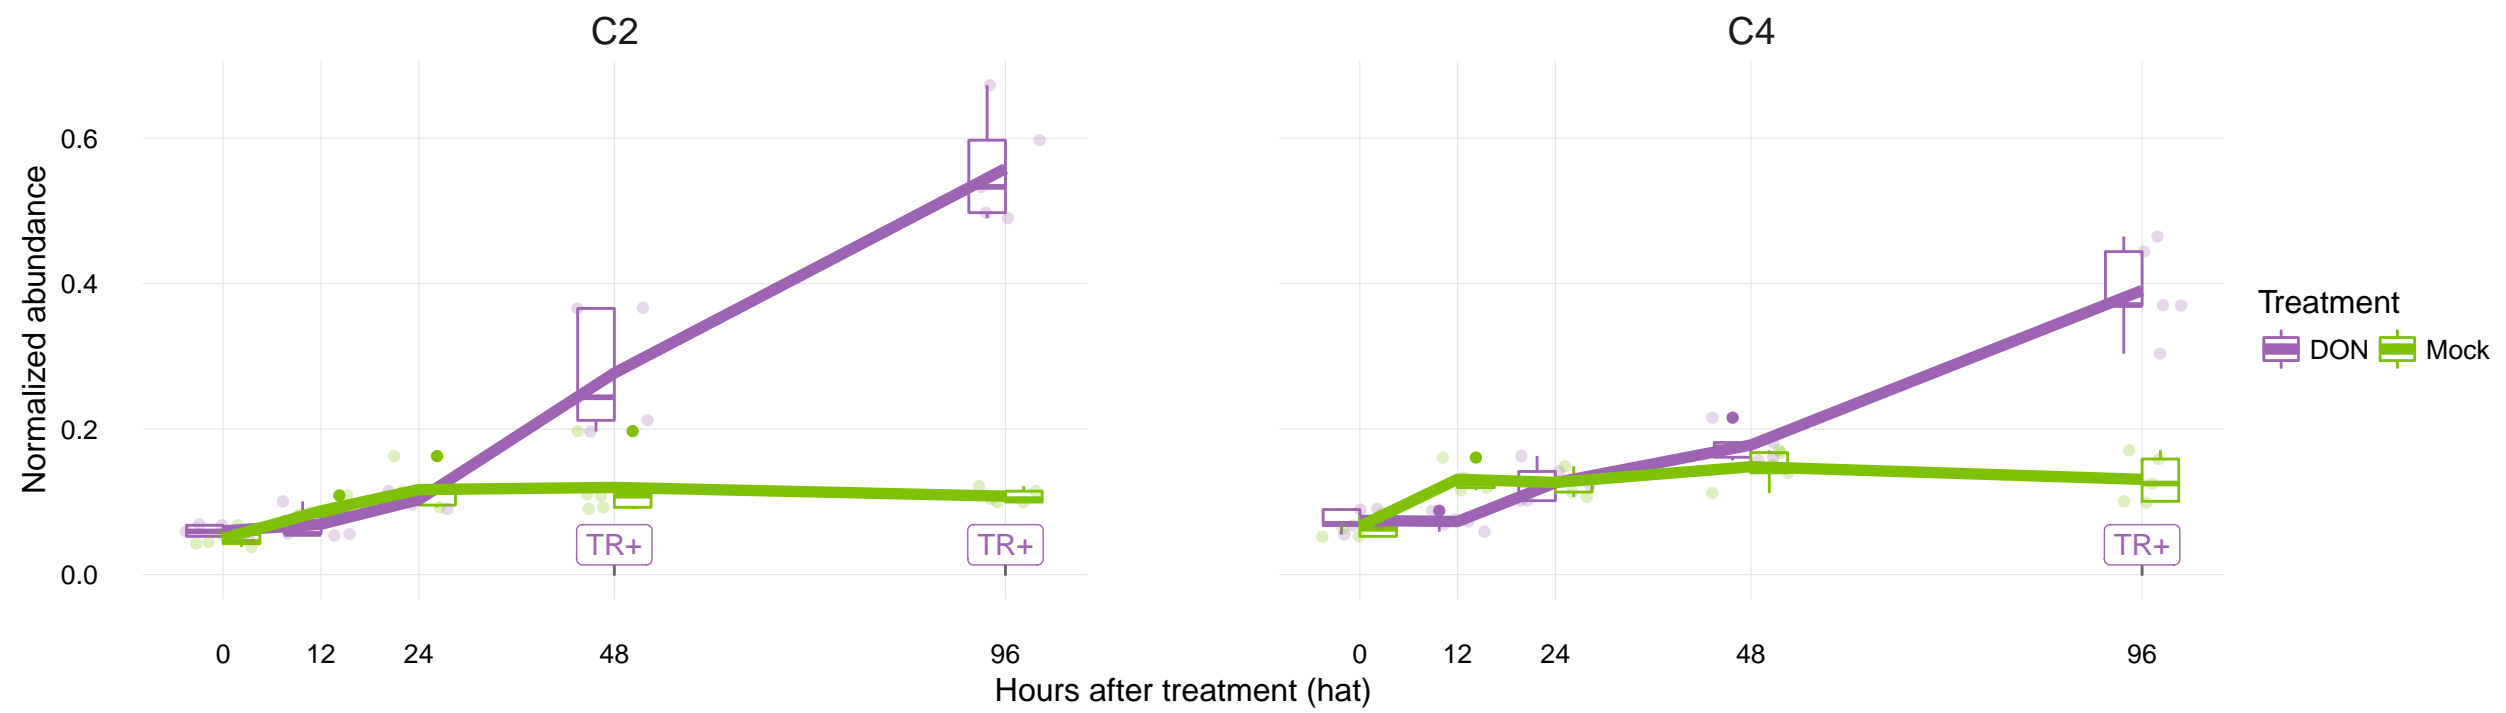

## DON, Mock; different genotypes

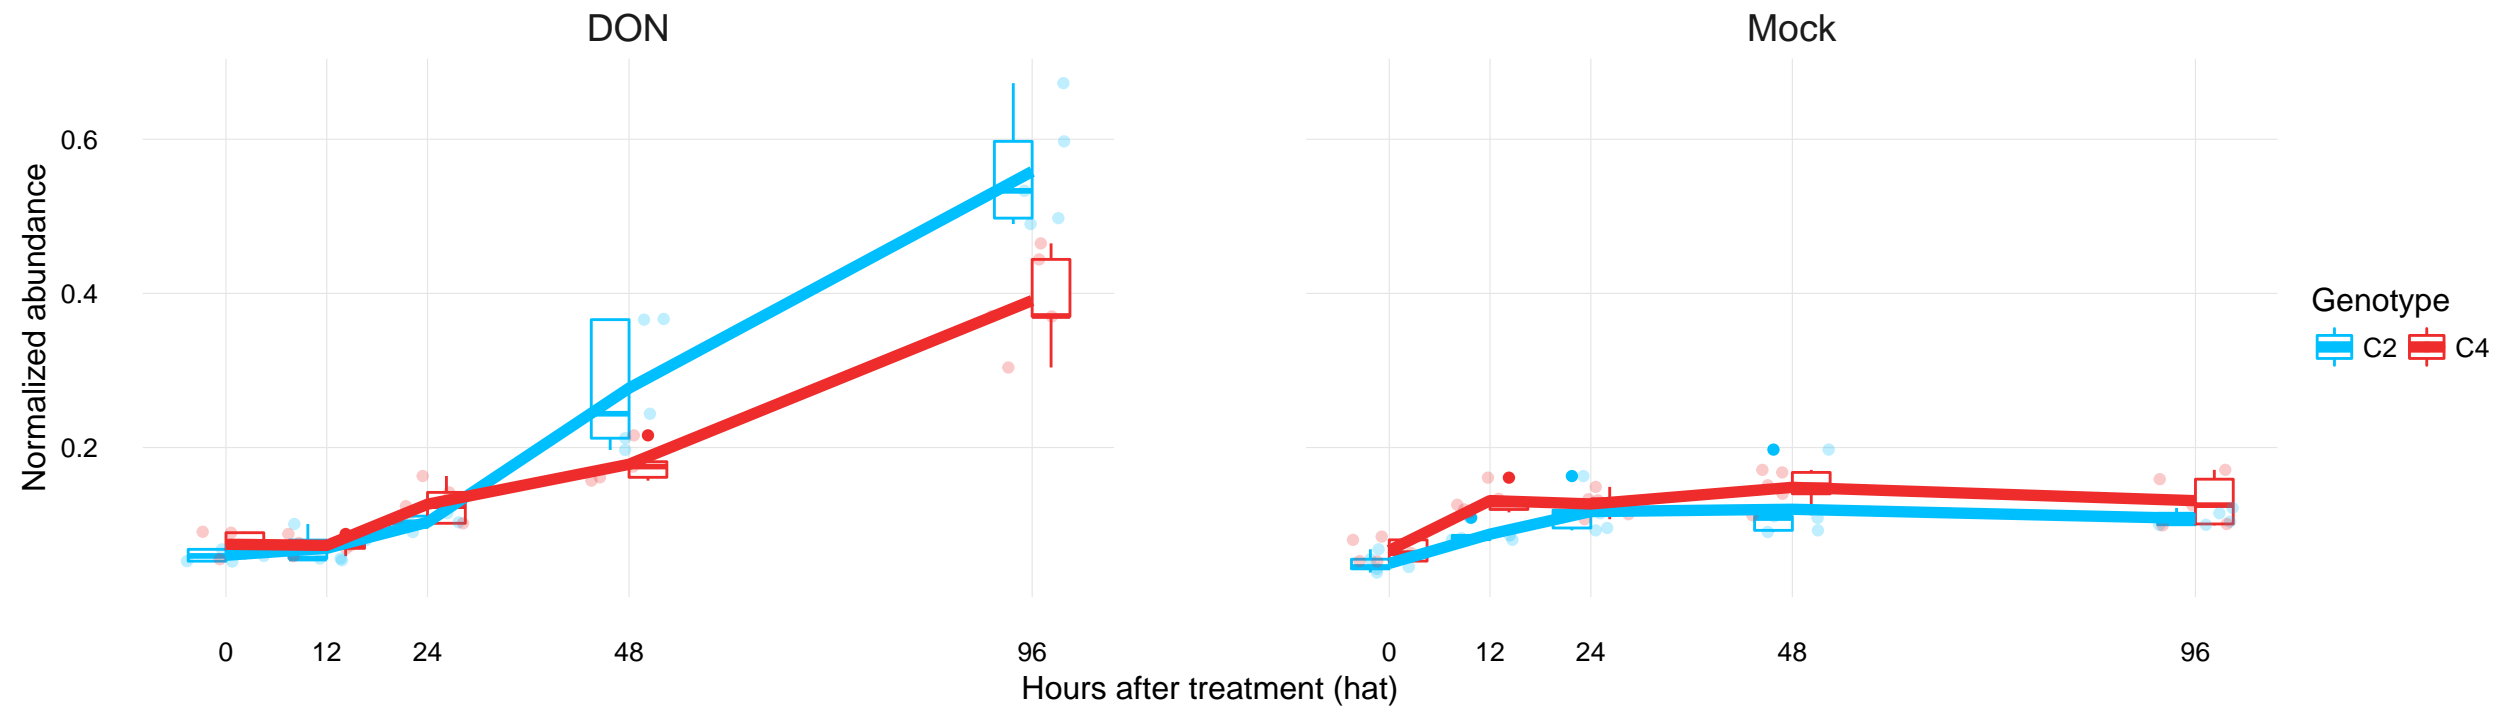

## CM, Remus; different treatments

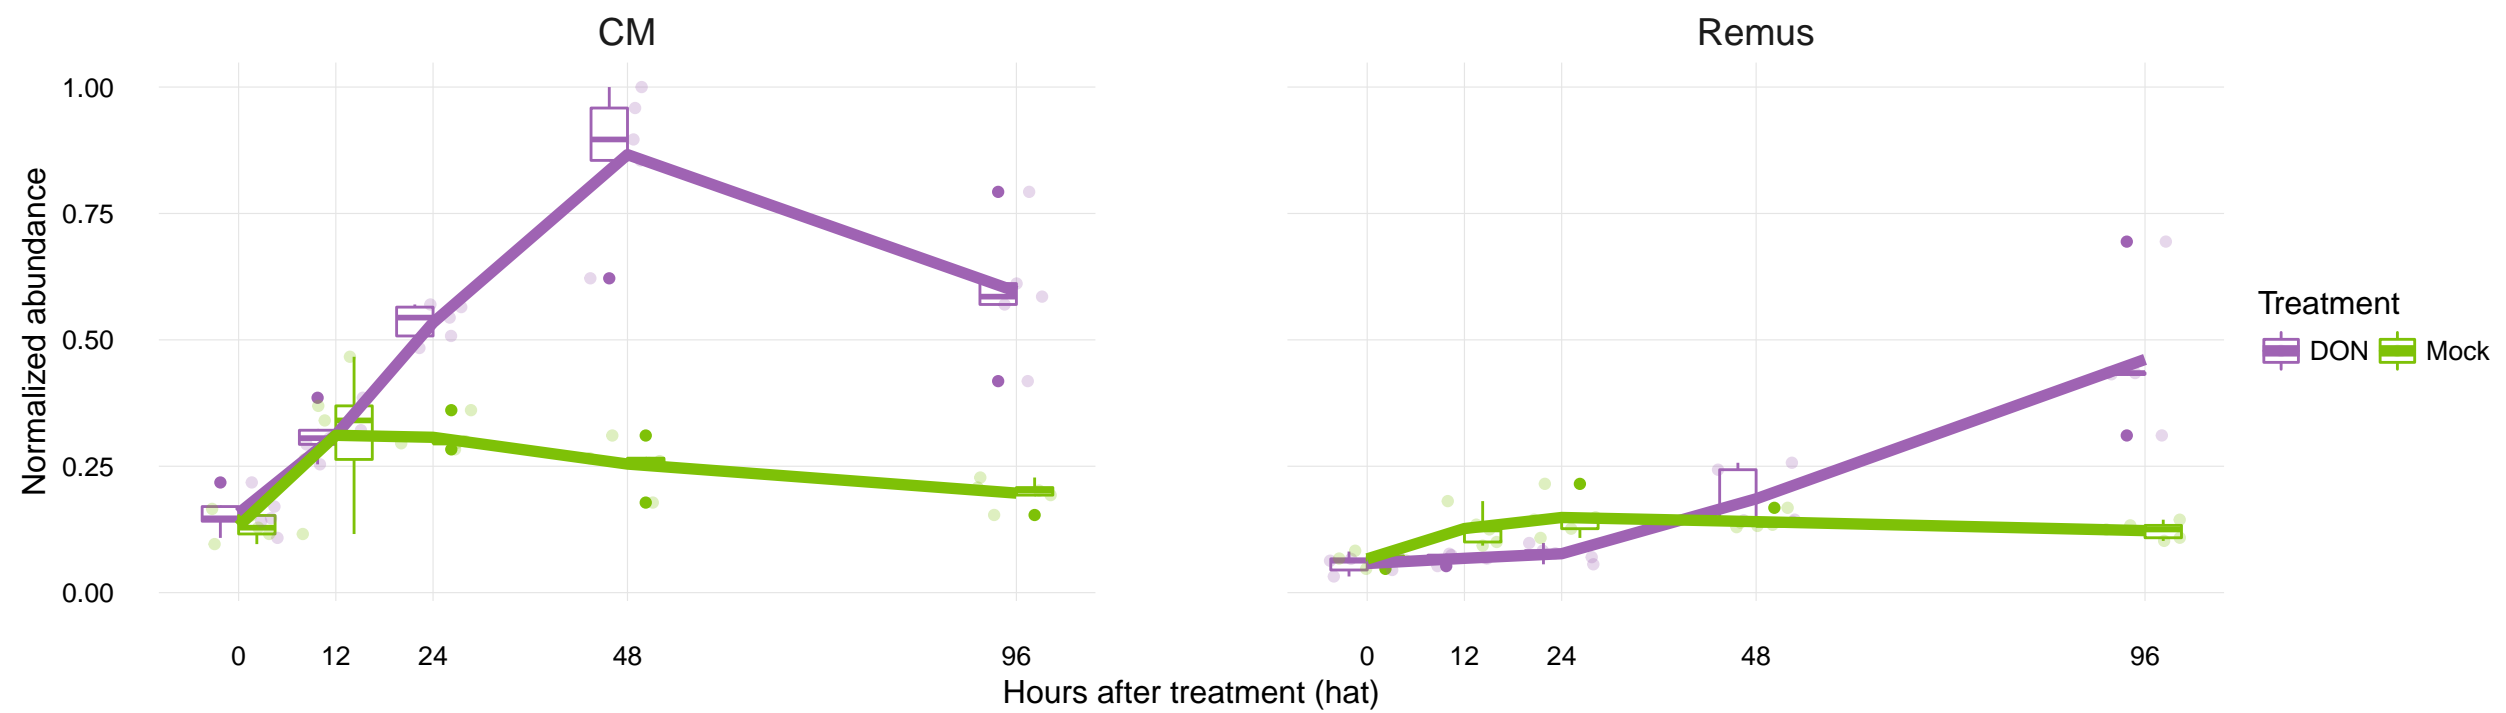

## DON, Mock; all four genotypes

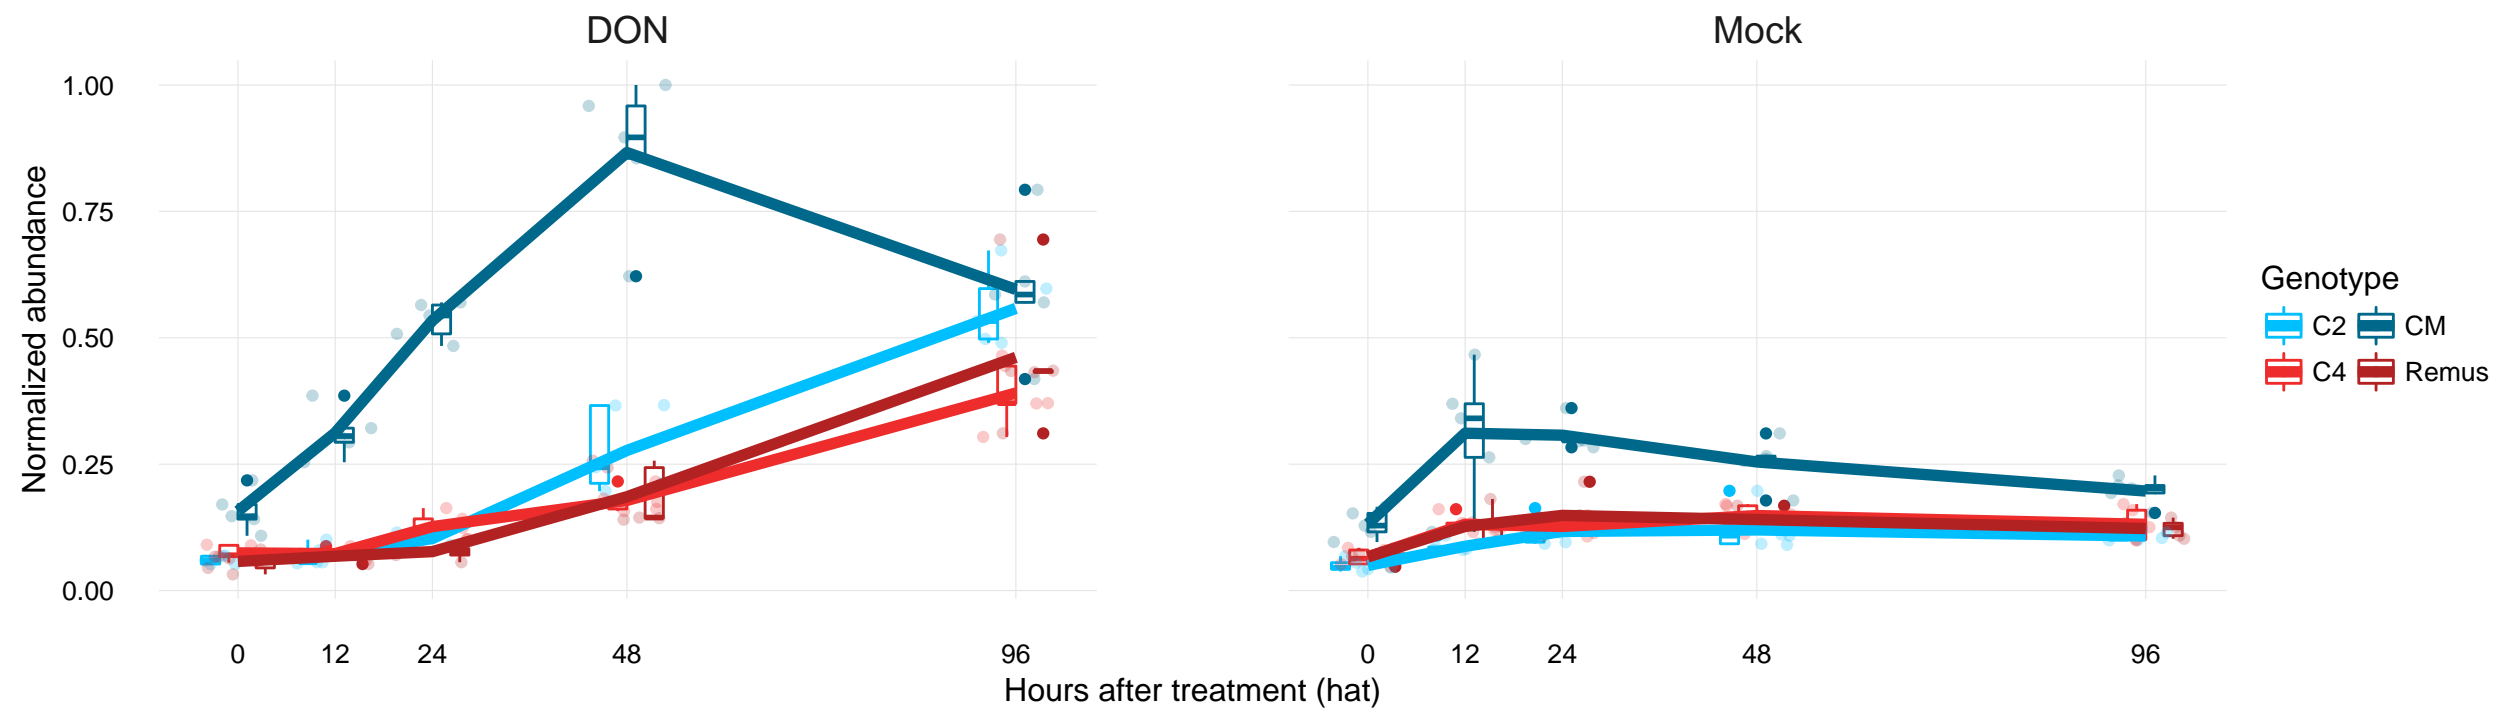

# A.123

Annotated as Lignan or HCA derivative  
(3 database hits)

|                |                          |
|----------------|--------------------------|
| MZ             | 515.1548                 |
| RT             | 19.78 min                |
| Normalization  | Directly via KPX samples |
| Cluster        | Cluster 1B               |
| Cn total / Phe | 26 / Several: 18,9       |

## C2, C4; different treatments

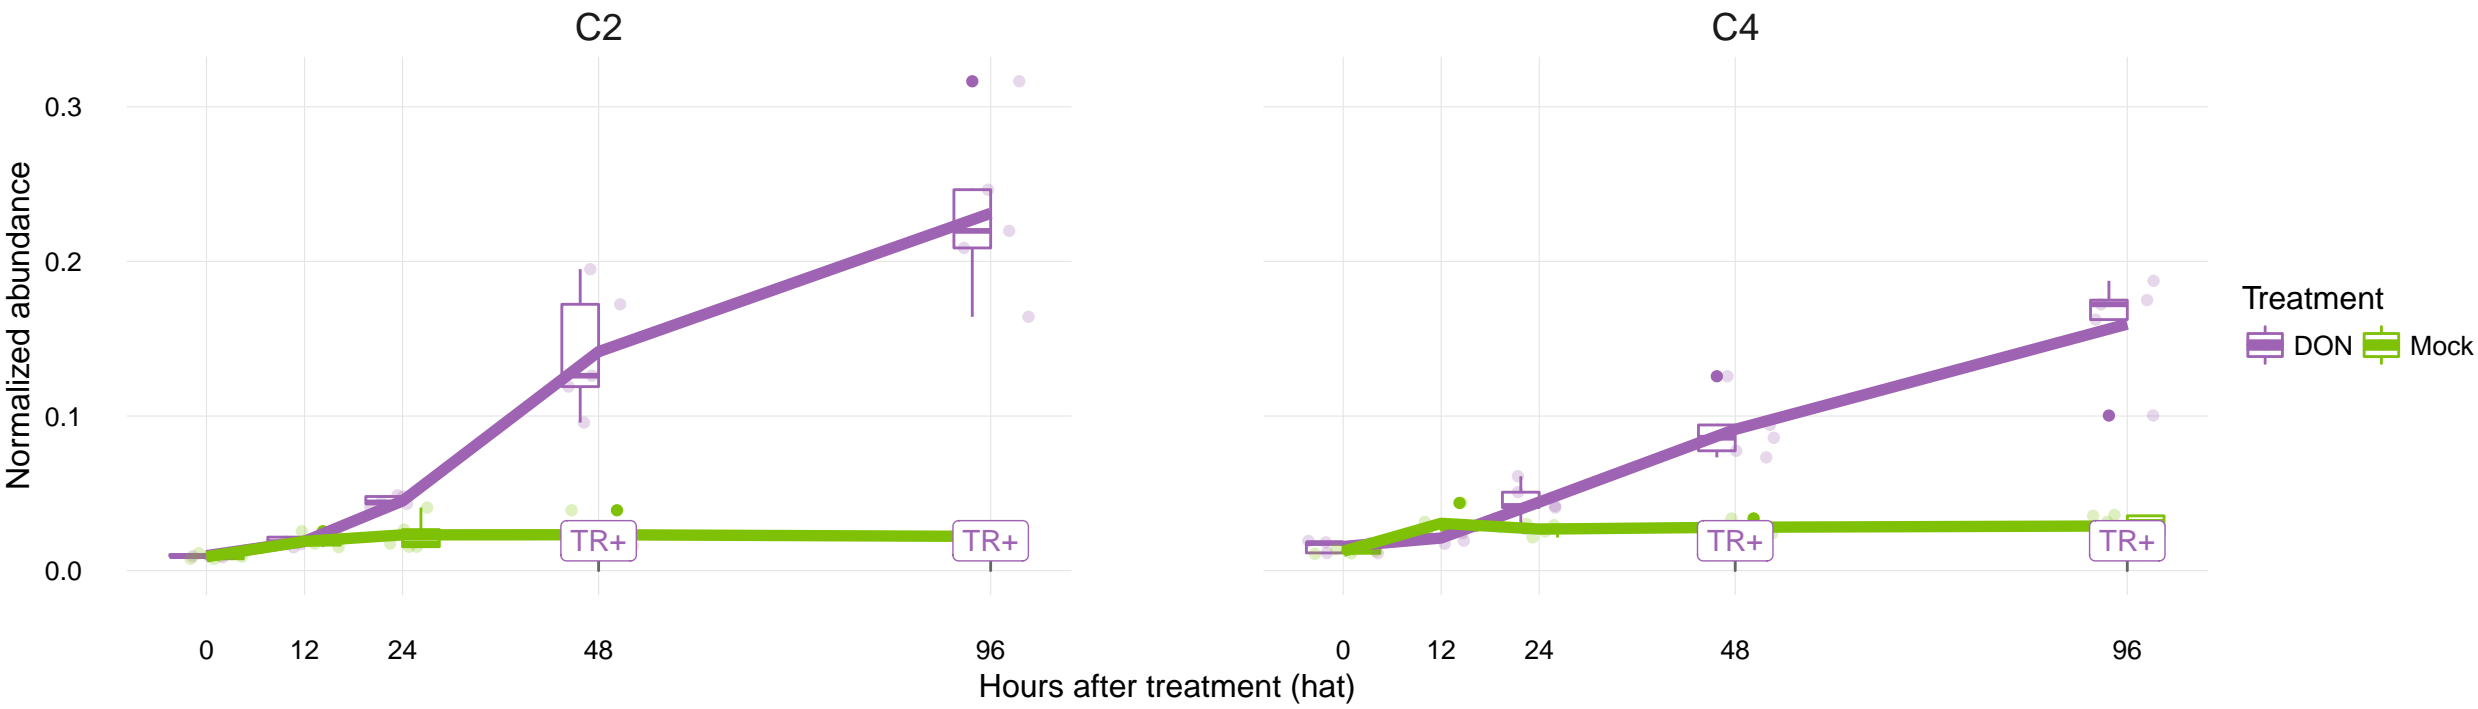

## DON, Mock; different genotypes

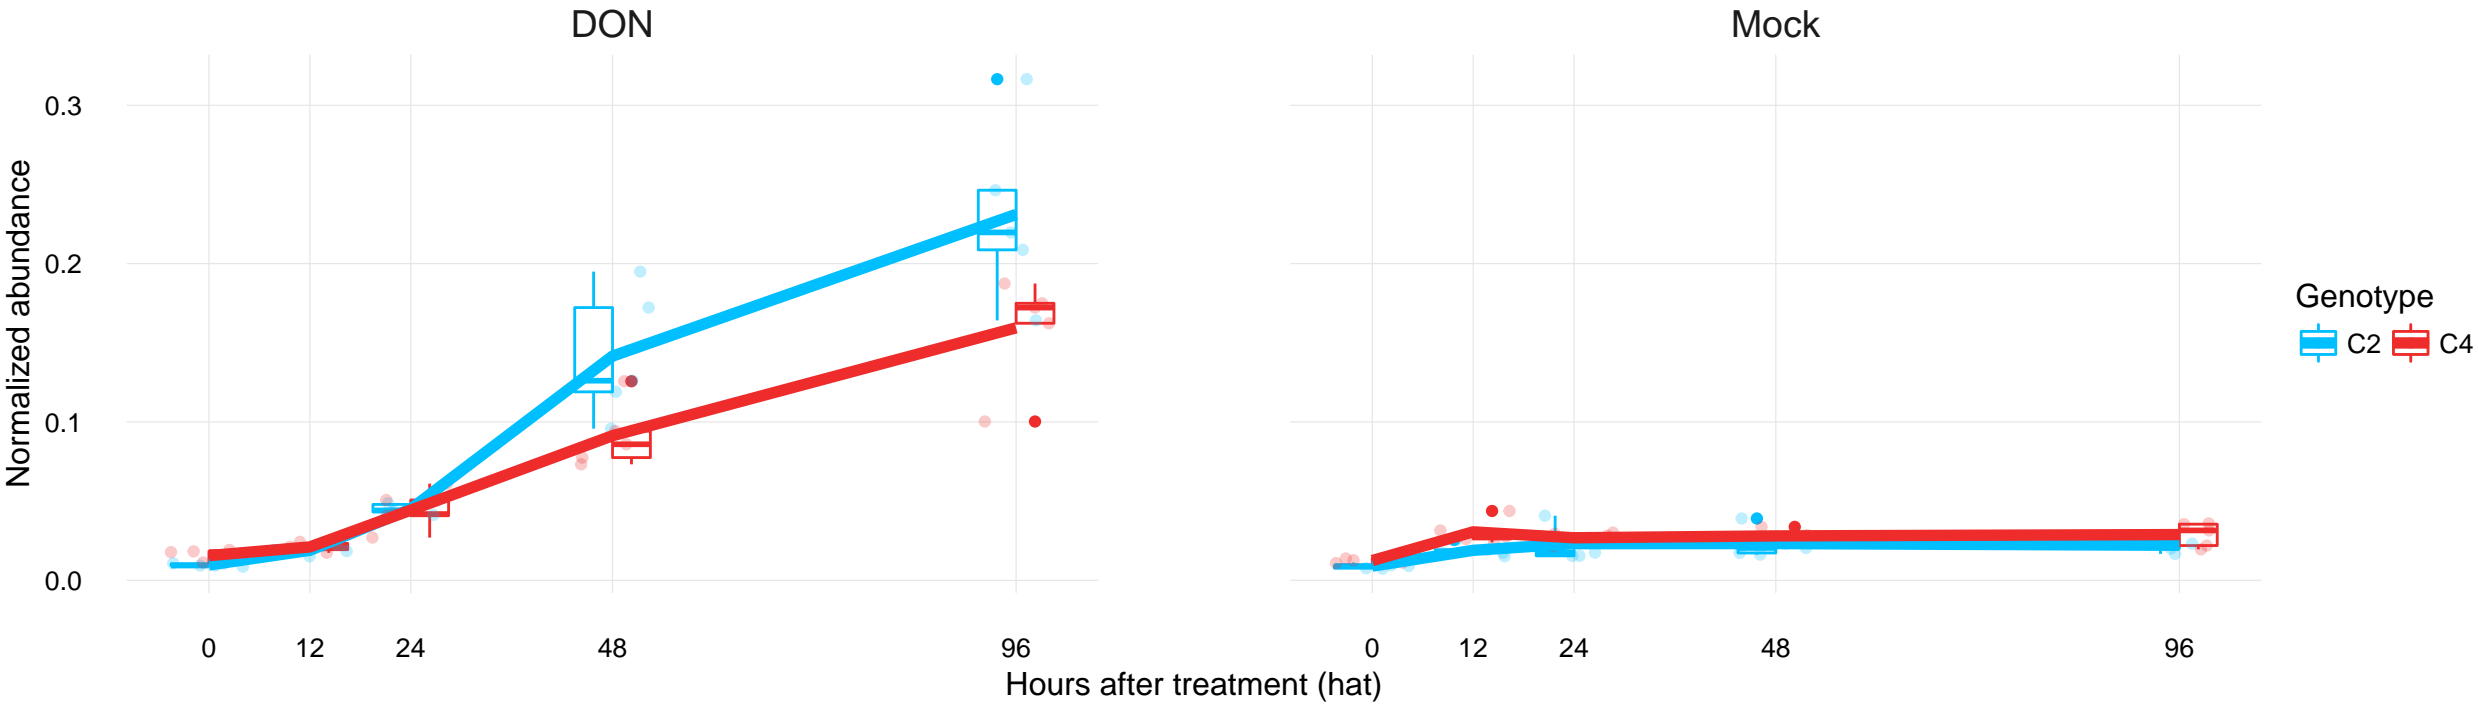

## CM, Remus; different treatments

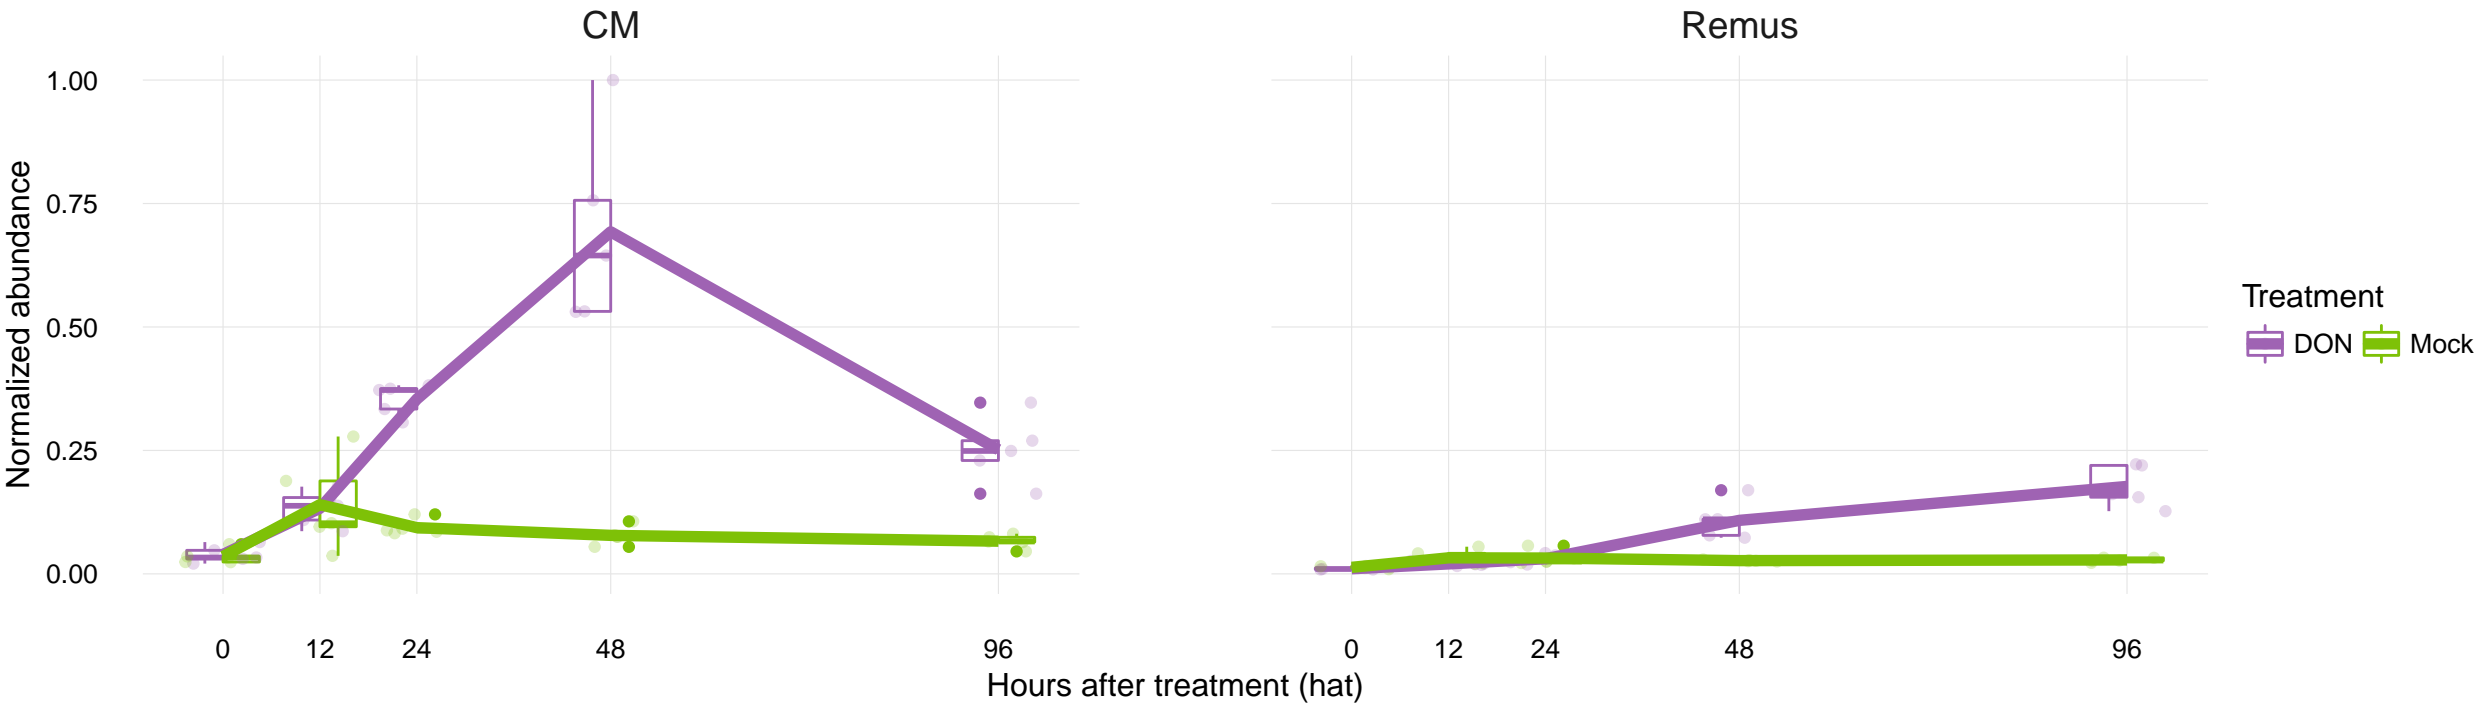

## DON, Mock; all four genotypes

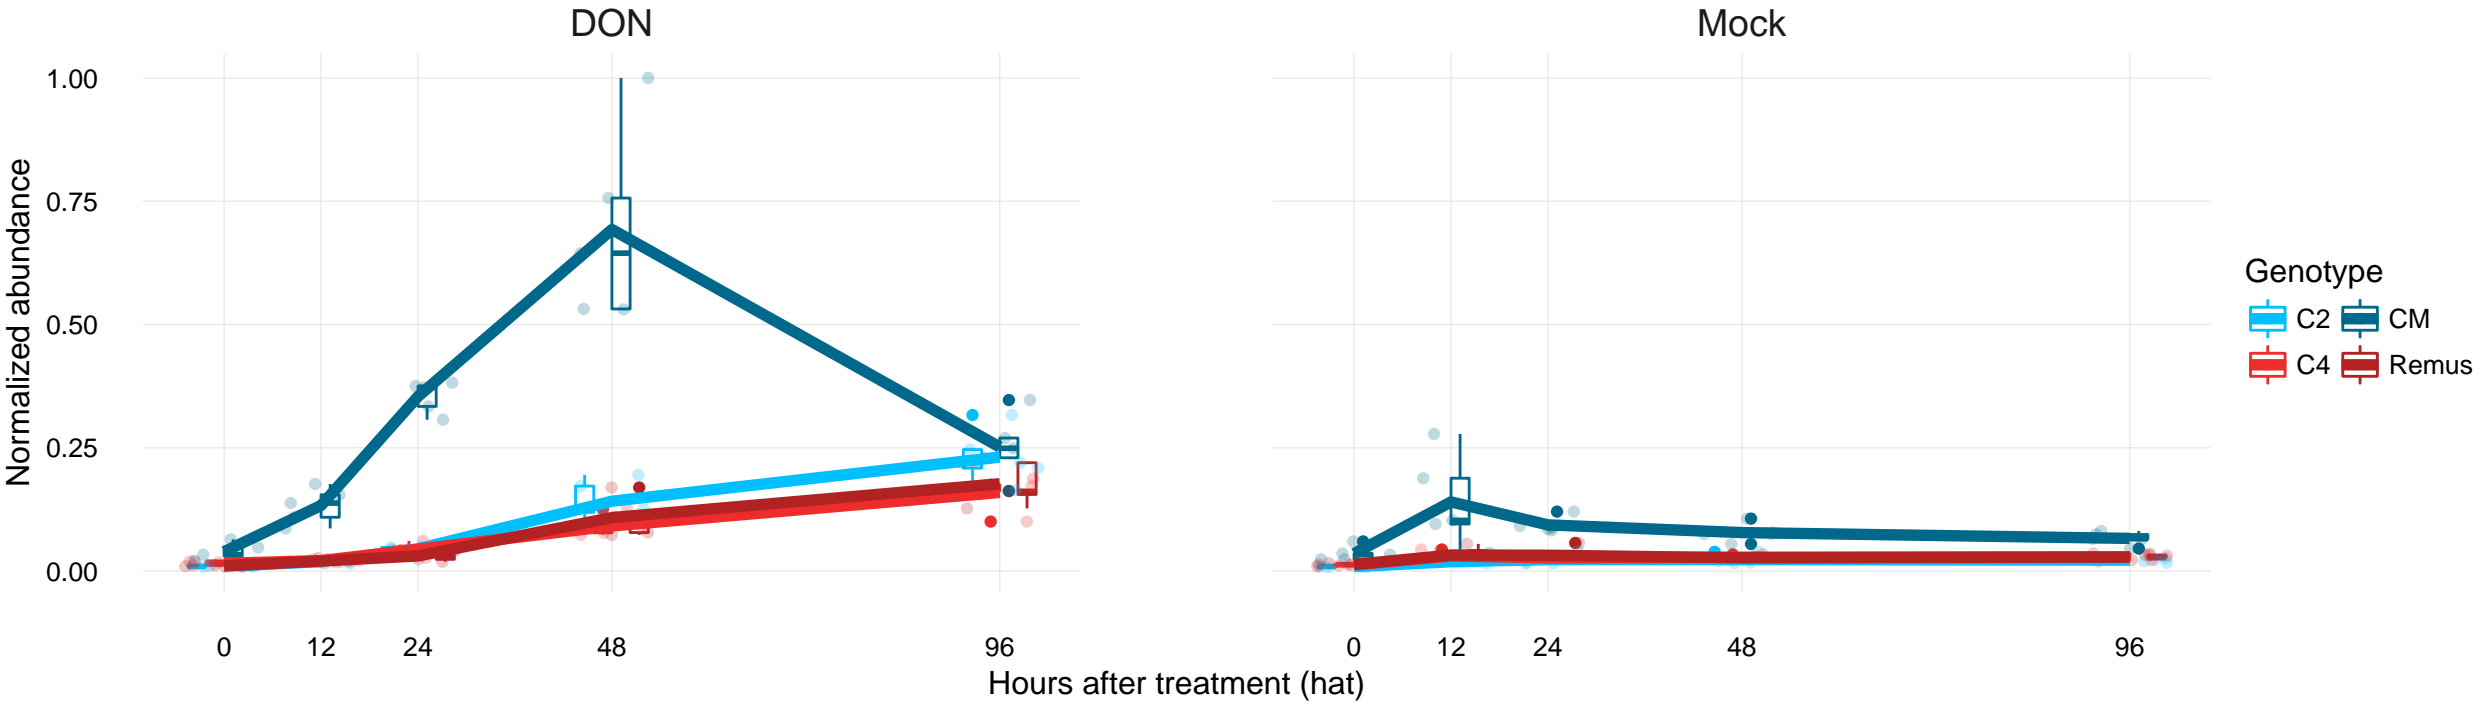

# U.2

Unknown Phe-derived wheat-metabolite

|                |                          |
|----------------|--------------------------|
| MZ             | 163.0754                 |
| RT             | 8.71 min                 |
| Normalization  | Directly via KPX samples |
| Cluster        | Cluster 1B               |
| Cn total / Phe | 10 /                     |

## C2, C4; different treatments

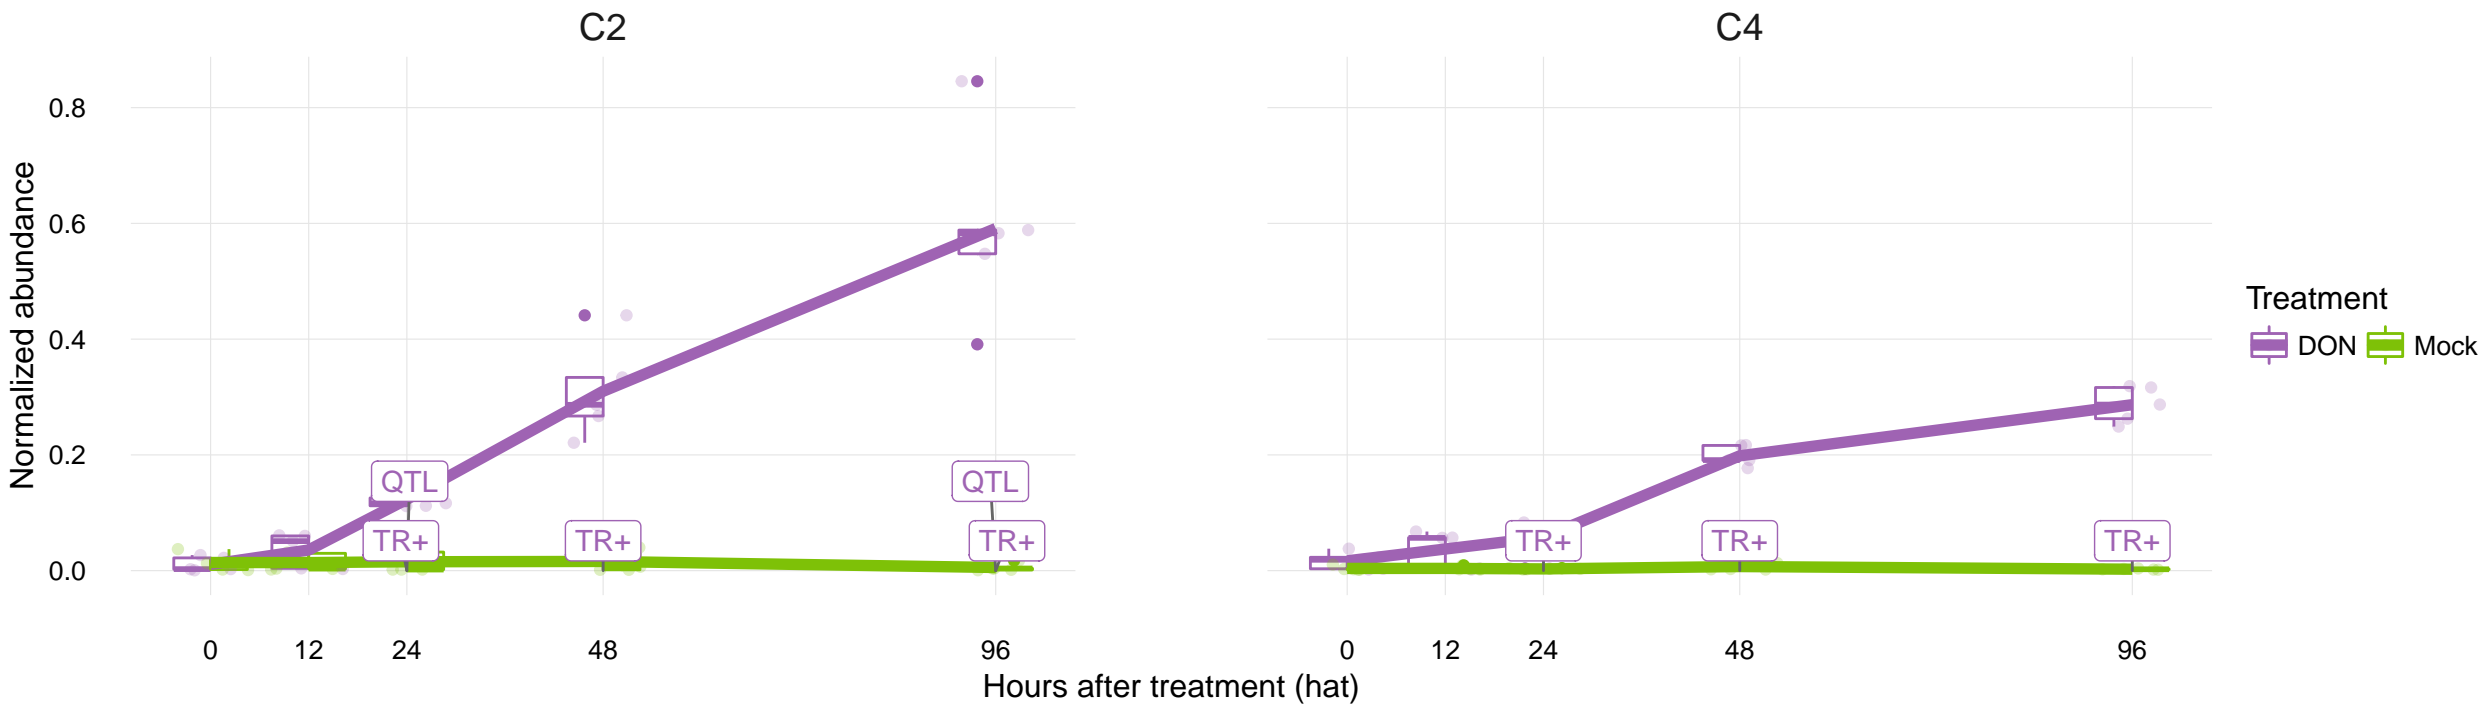

## DON, Mock; different genotypes

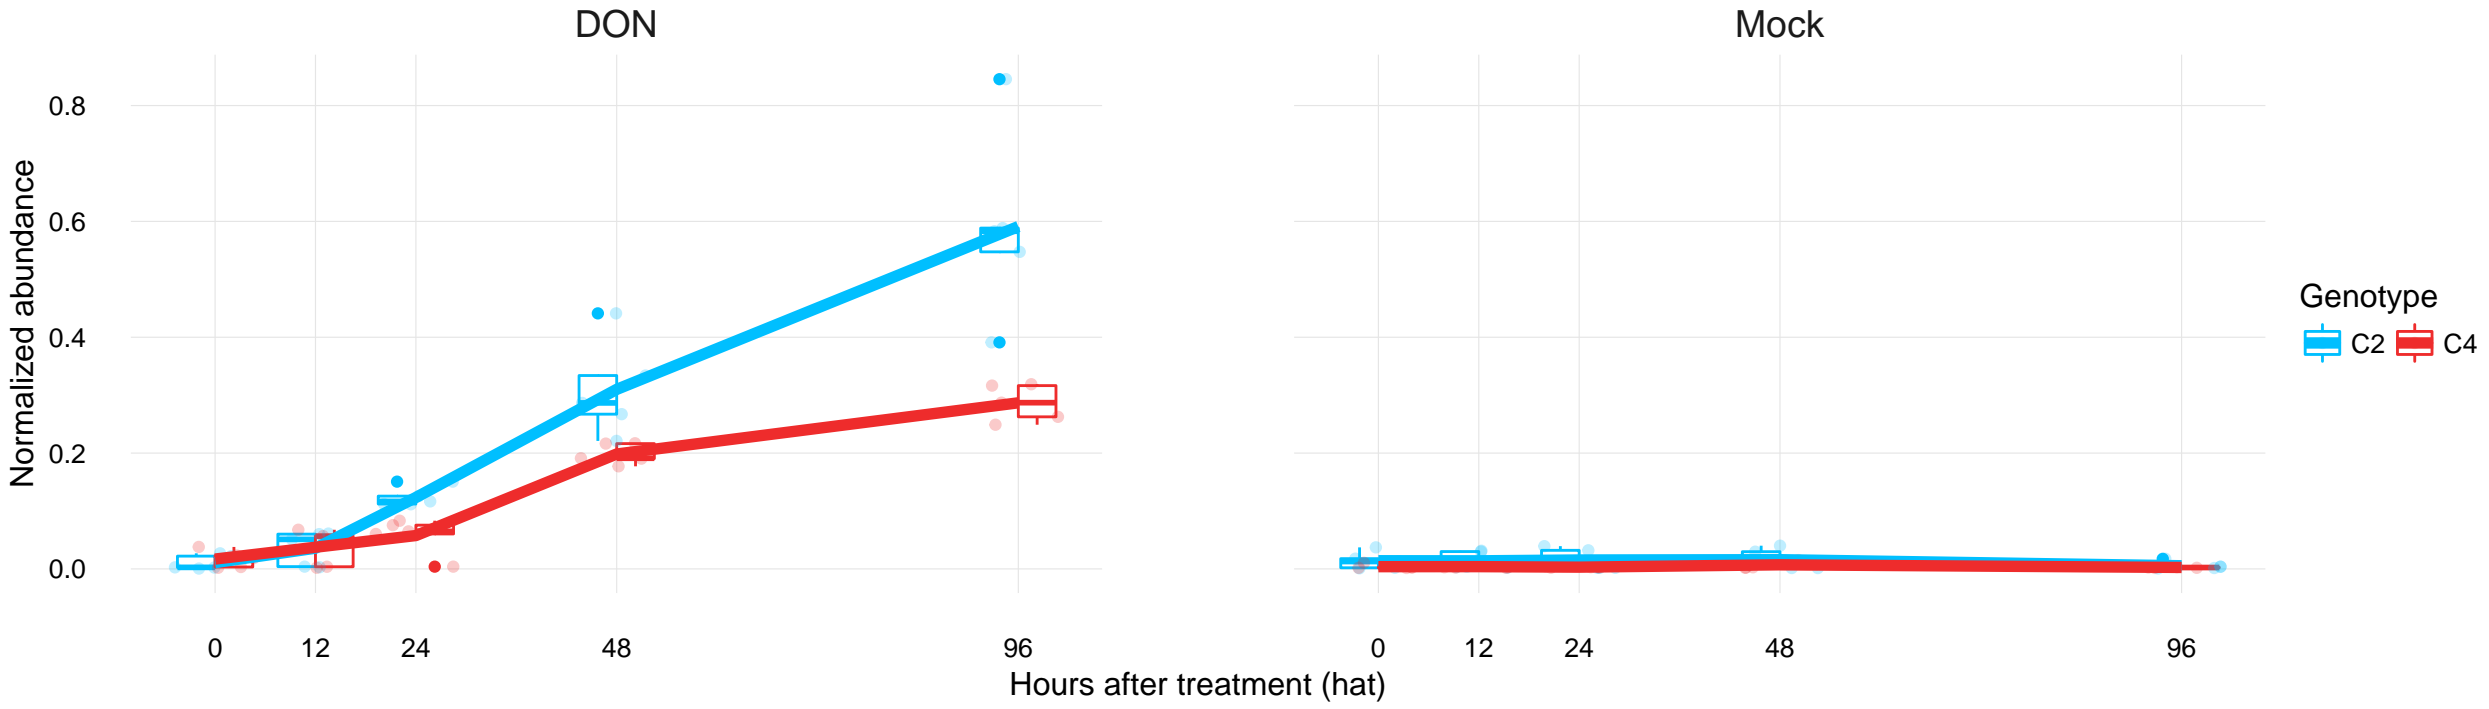

## CM, Remus; different treatments

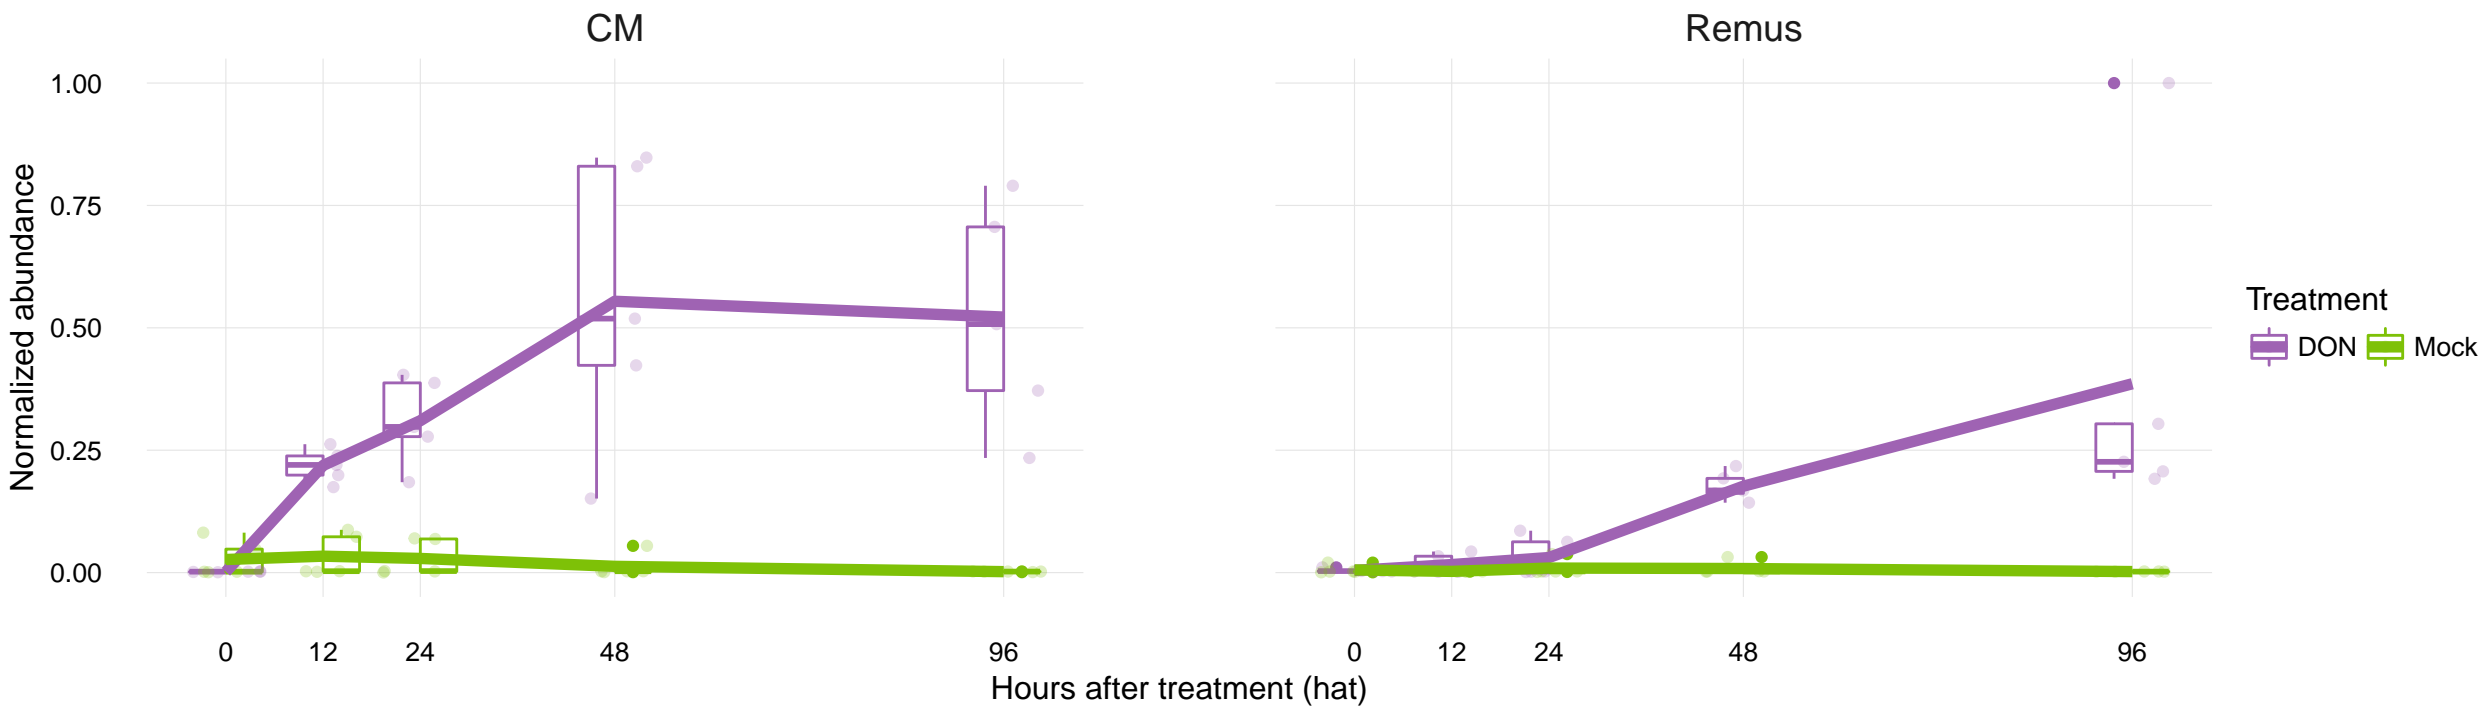

## DON, Mock; all four genotypes

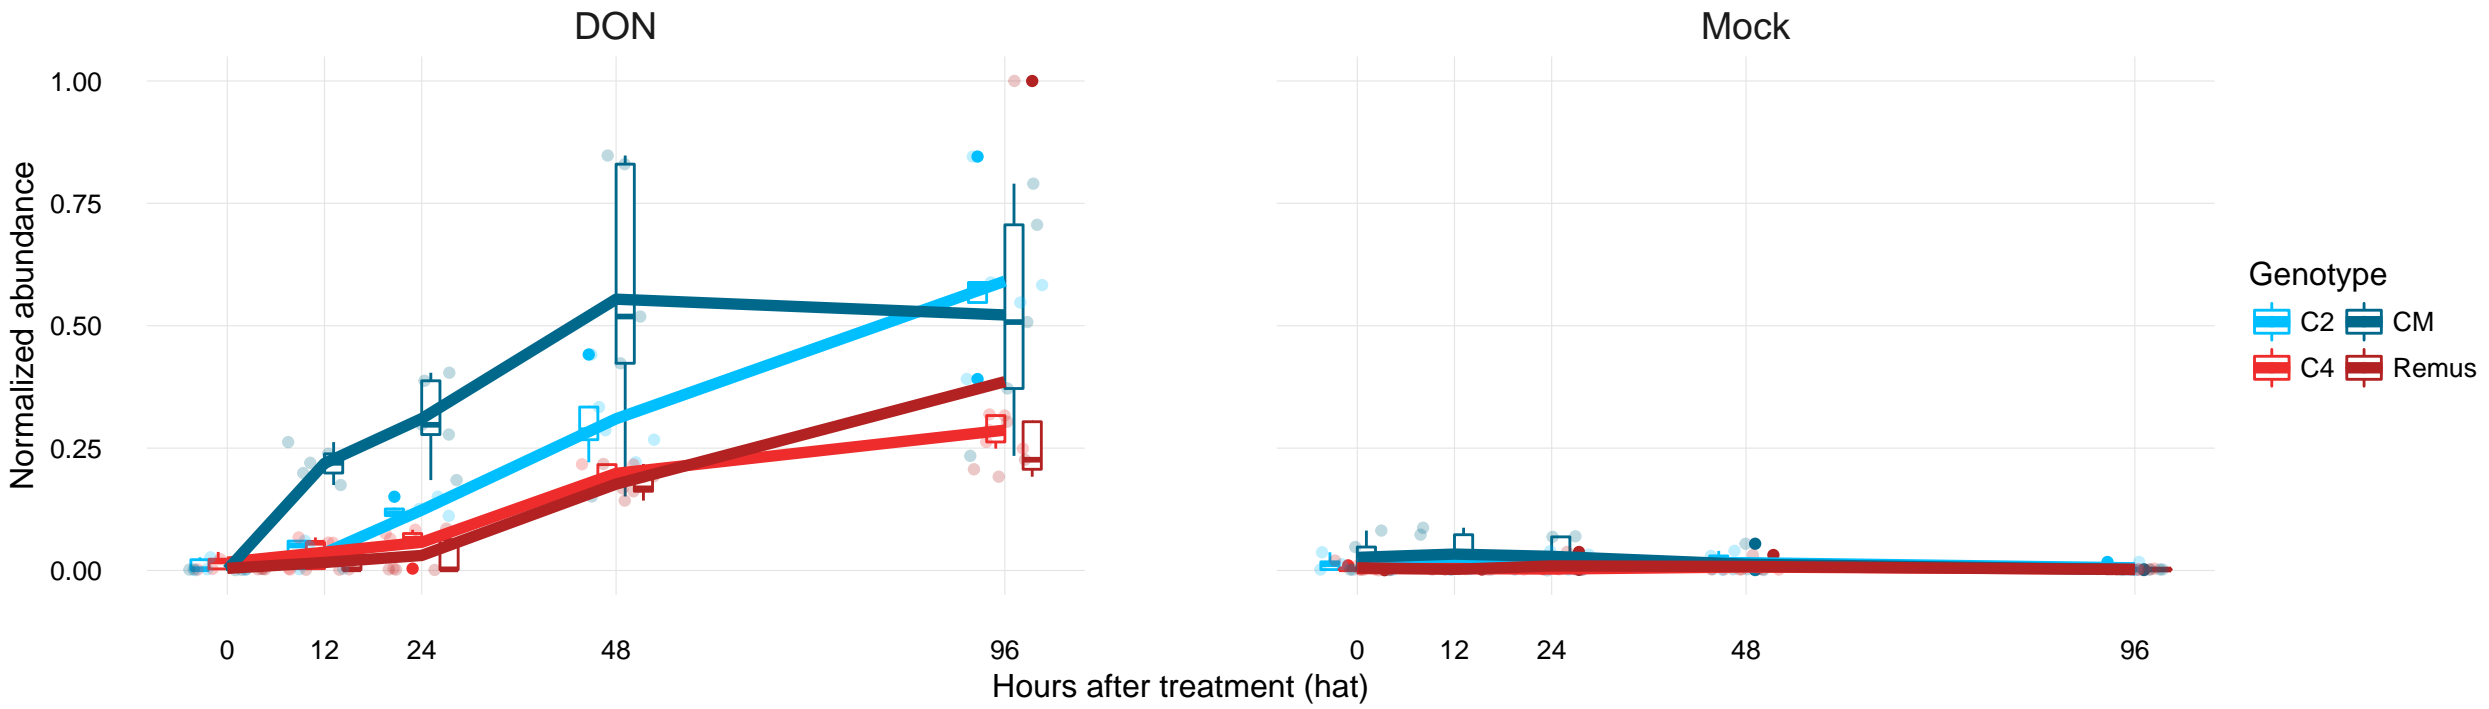

# U.4

Unknown Phe-derived wheat-metabolite

|                |                          |
|----------------|--------------------------|
| MZ             | 163.0753                 |
| RT             | 12.31 min                |
| Normalization  | Directly via KPX samples |
| Cluster        | Cluster 1B               |
| Cn total / Phe | 10 /                     |

C2, C4; different treatments

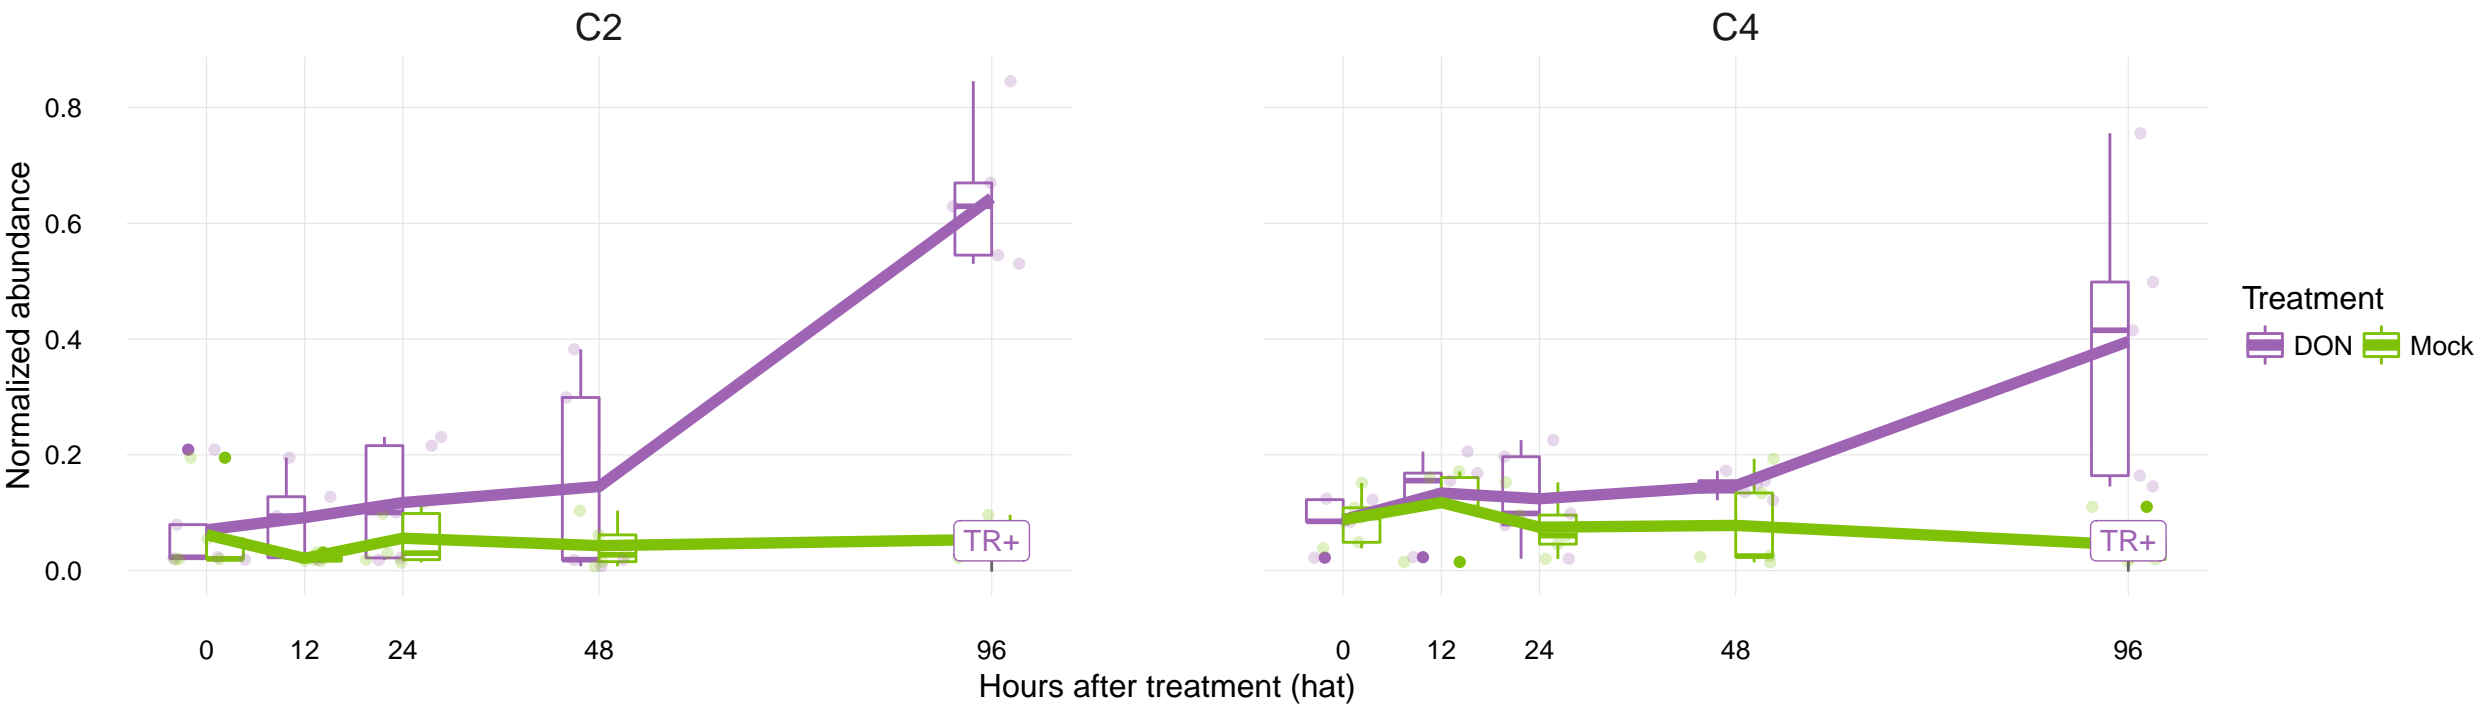

DON, Mock; different genotypes

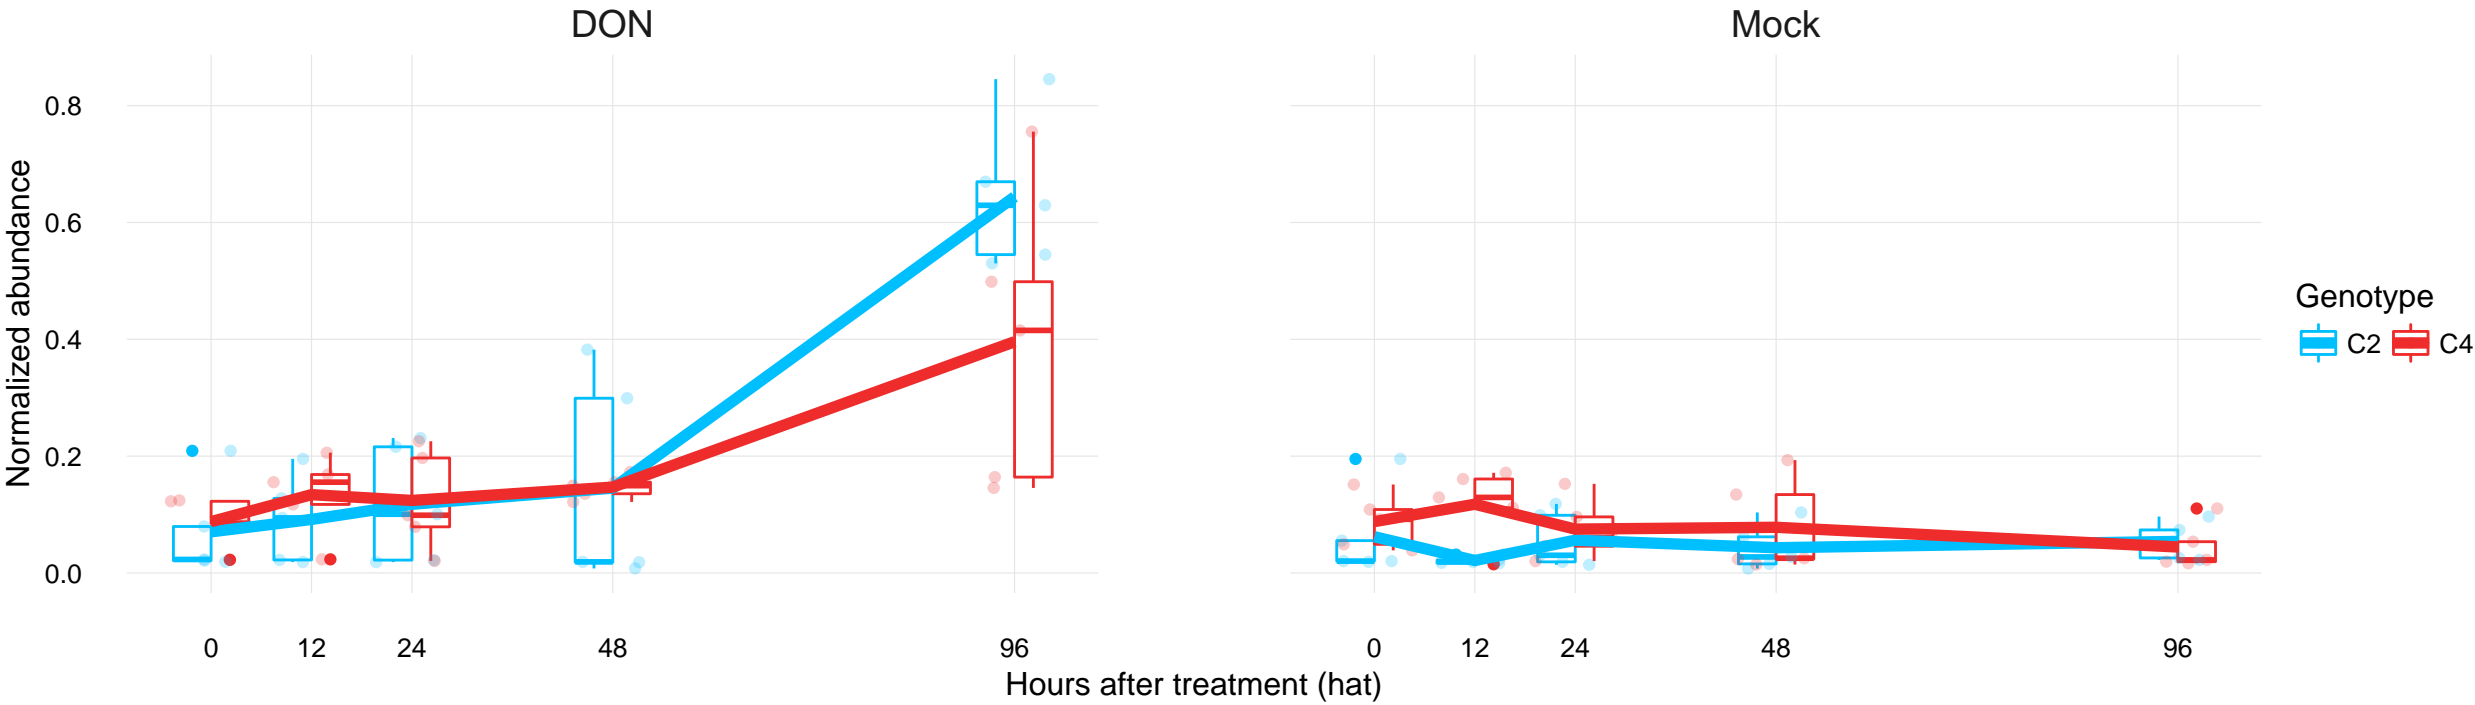

CM, Remus; different treatments

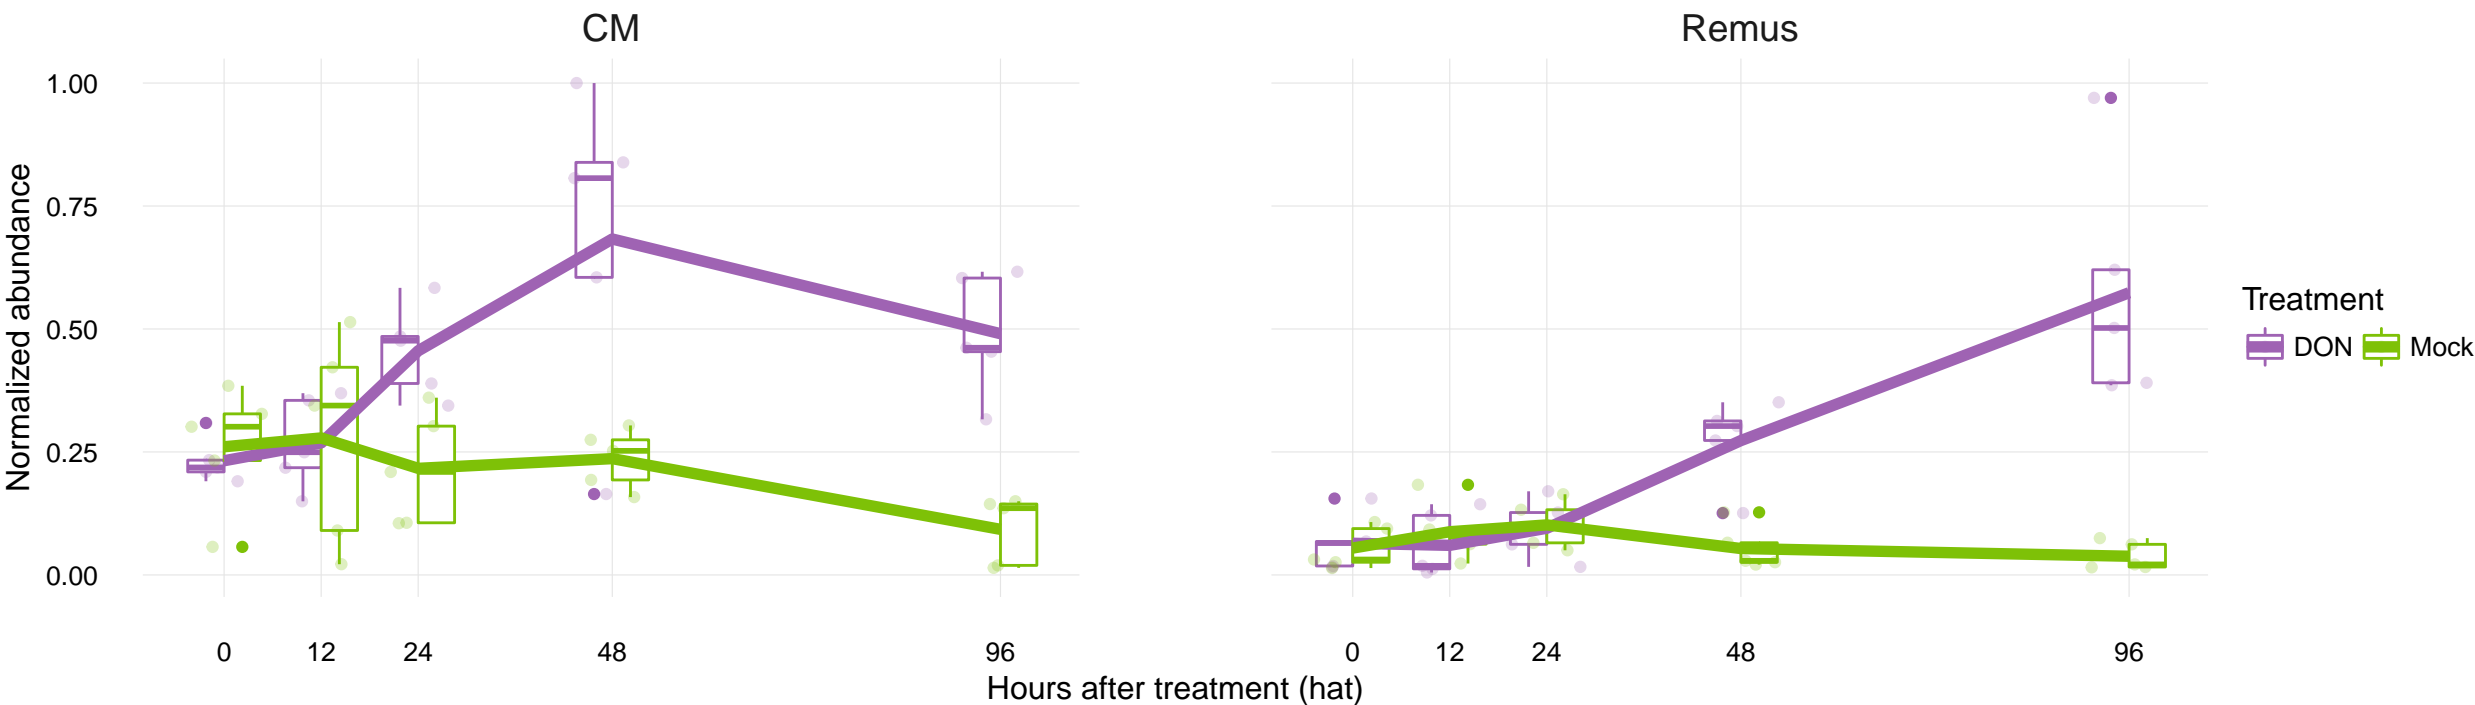

DON, Mock; all four genotypes

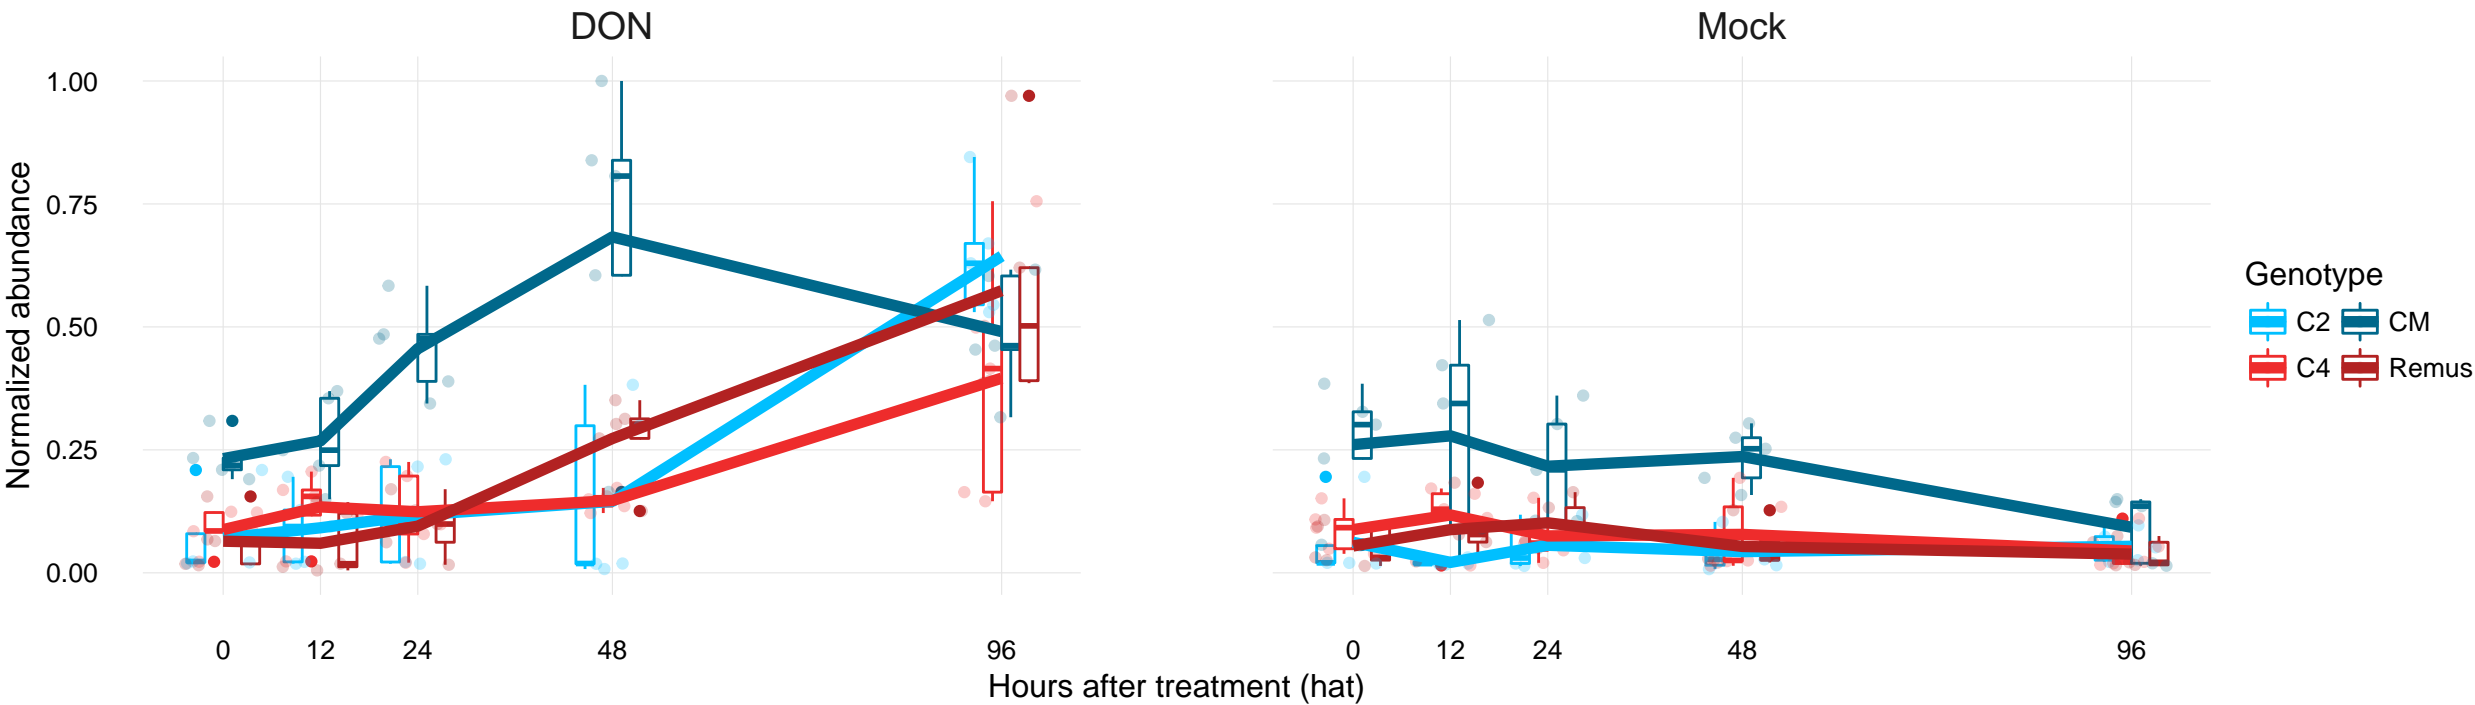



# A.7

Annotated as HCAA  
(2 database hits)

|                |                |
|----------------|----------------|
| MZ             | 251.1392       |
| RT             | 5.06 min       |
| Normalization  | Not normalized |
| Cluster        | Cluster 1A     |
| Cn total / Phe | 13 /           |

## C2, C4; different treatments

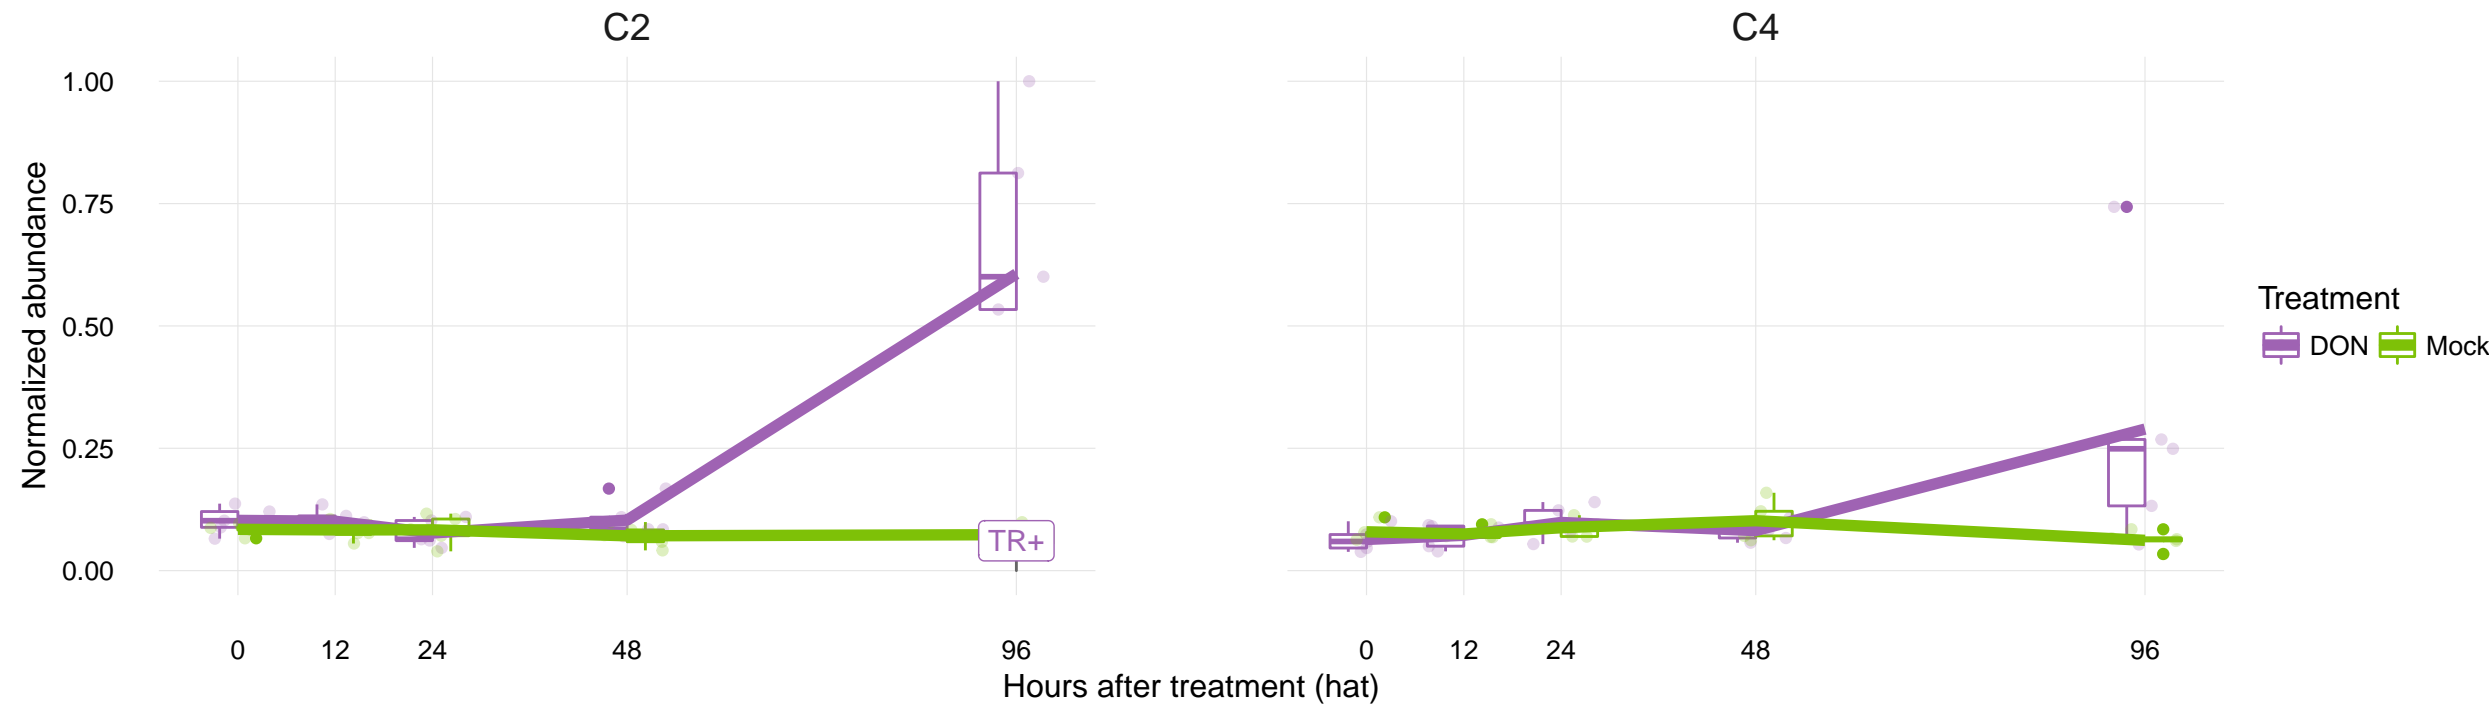

## DON, Mock; different genotypes

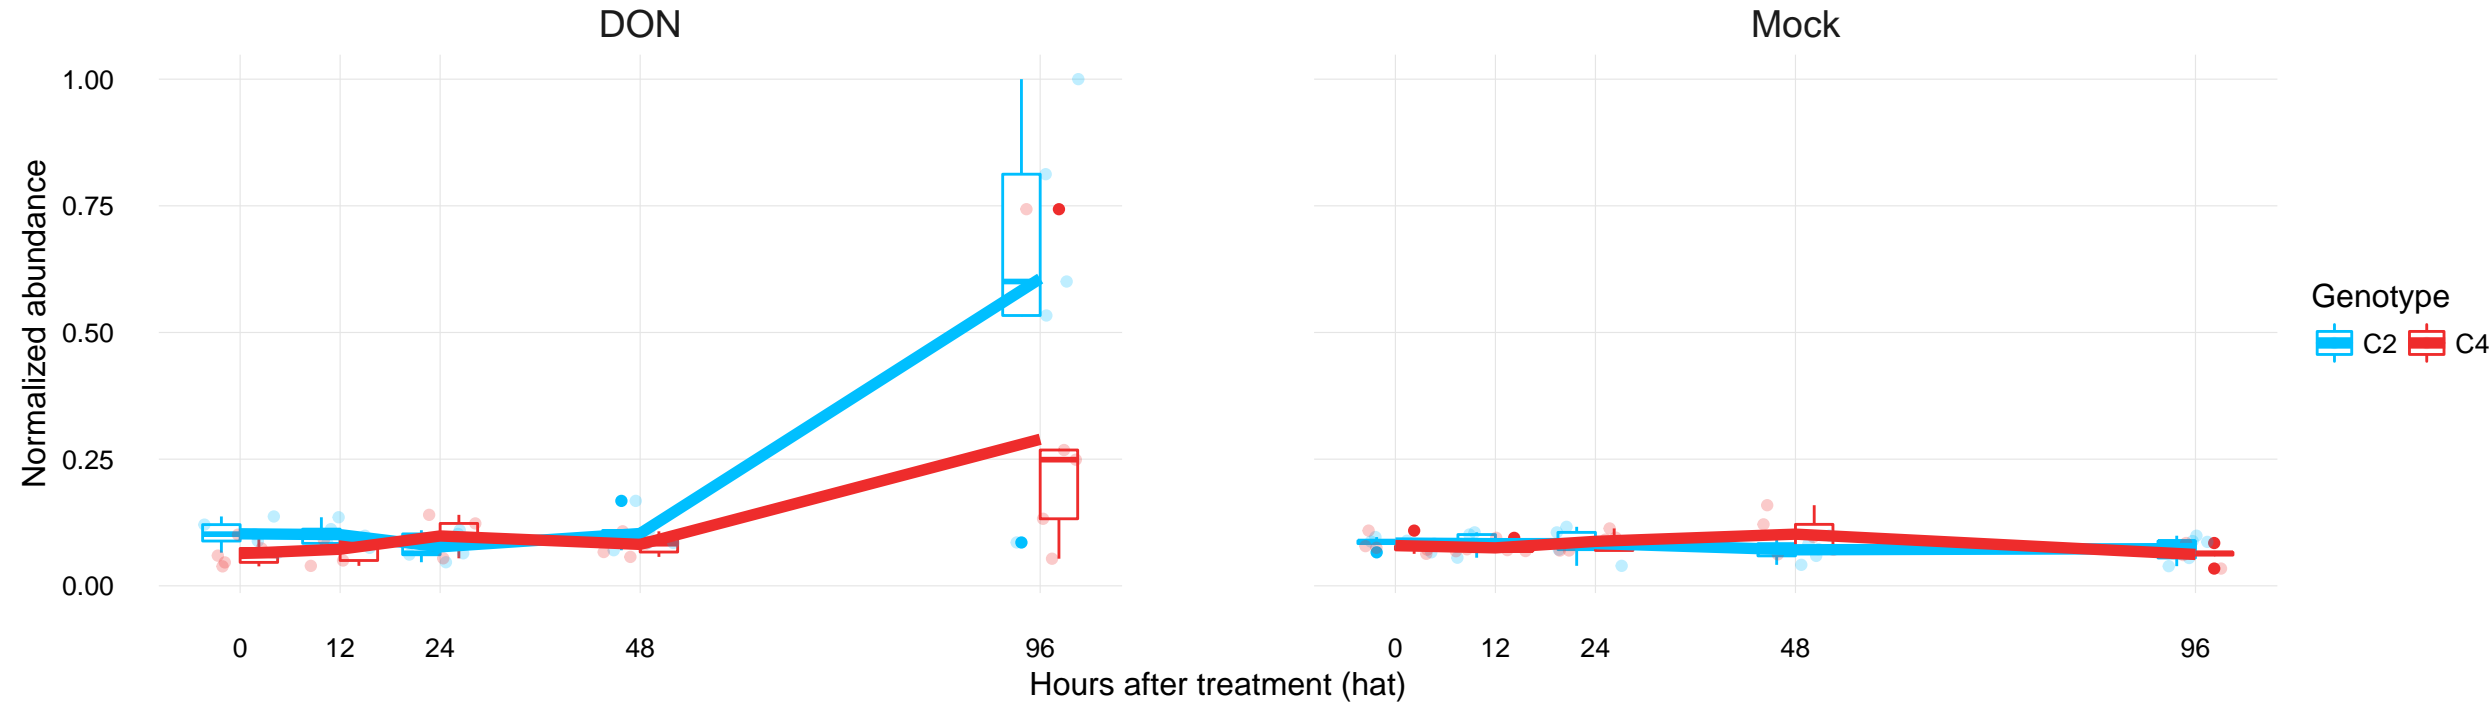

## CM, Remus; different treatments

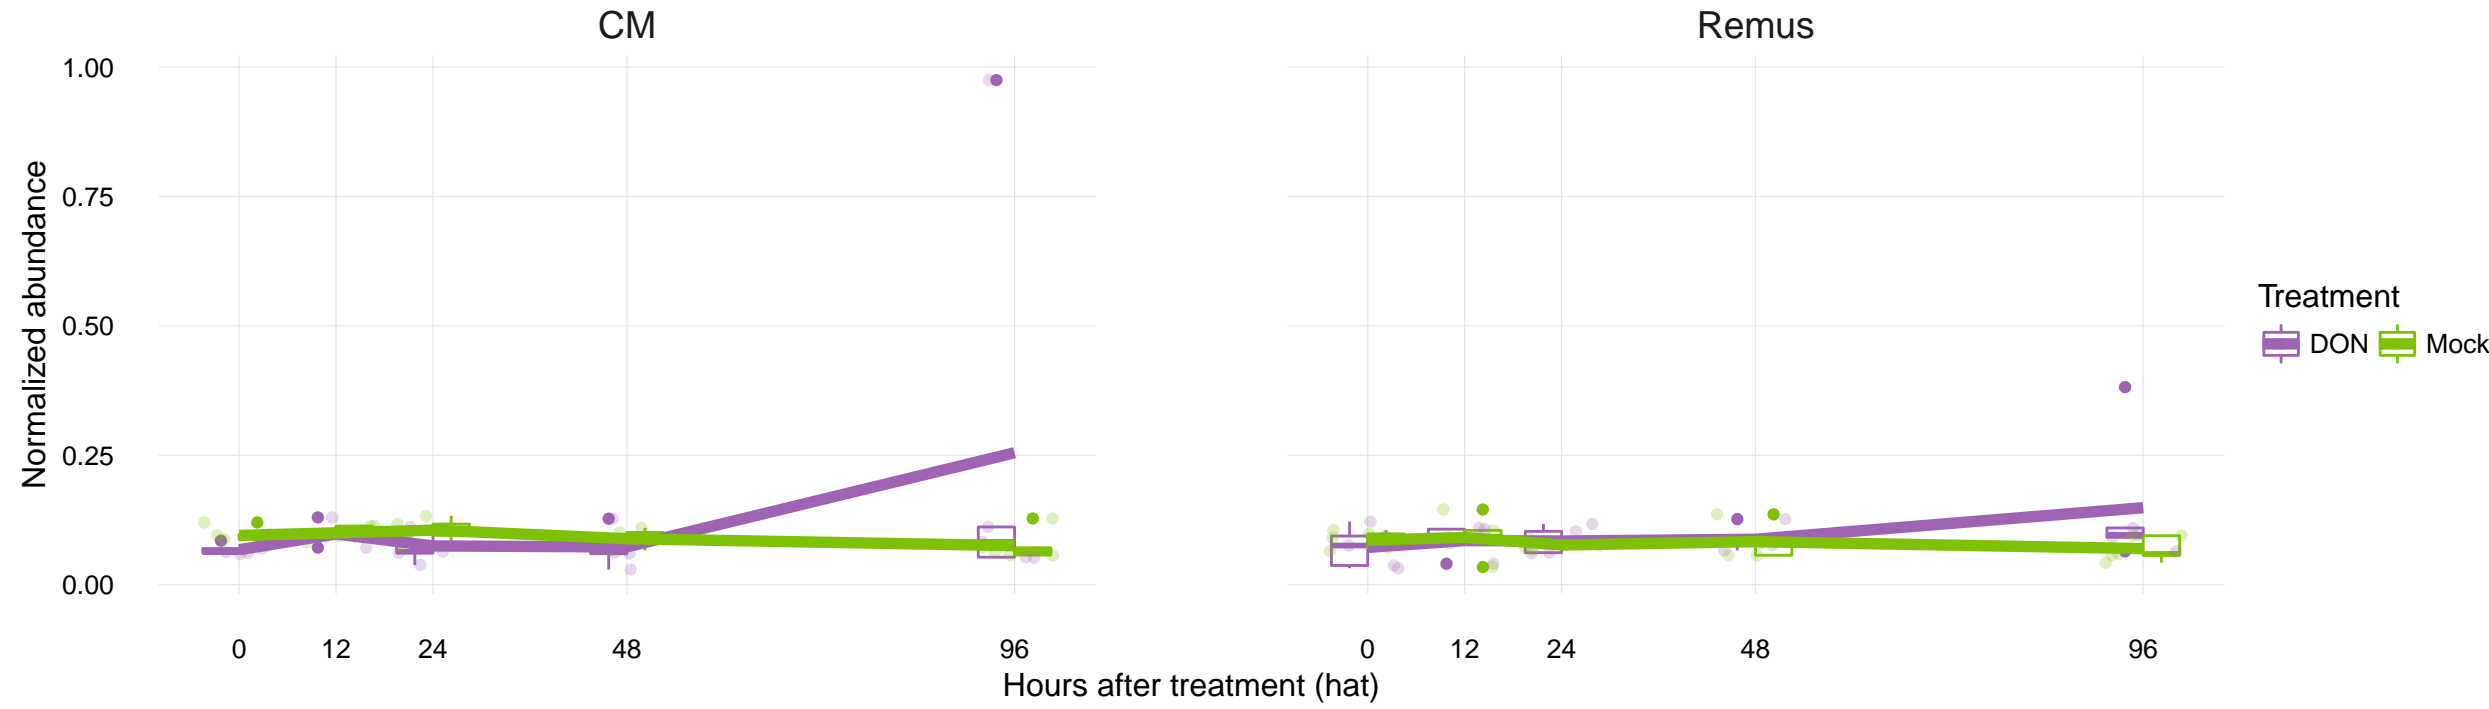

## DON, Mock; all four genotypes

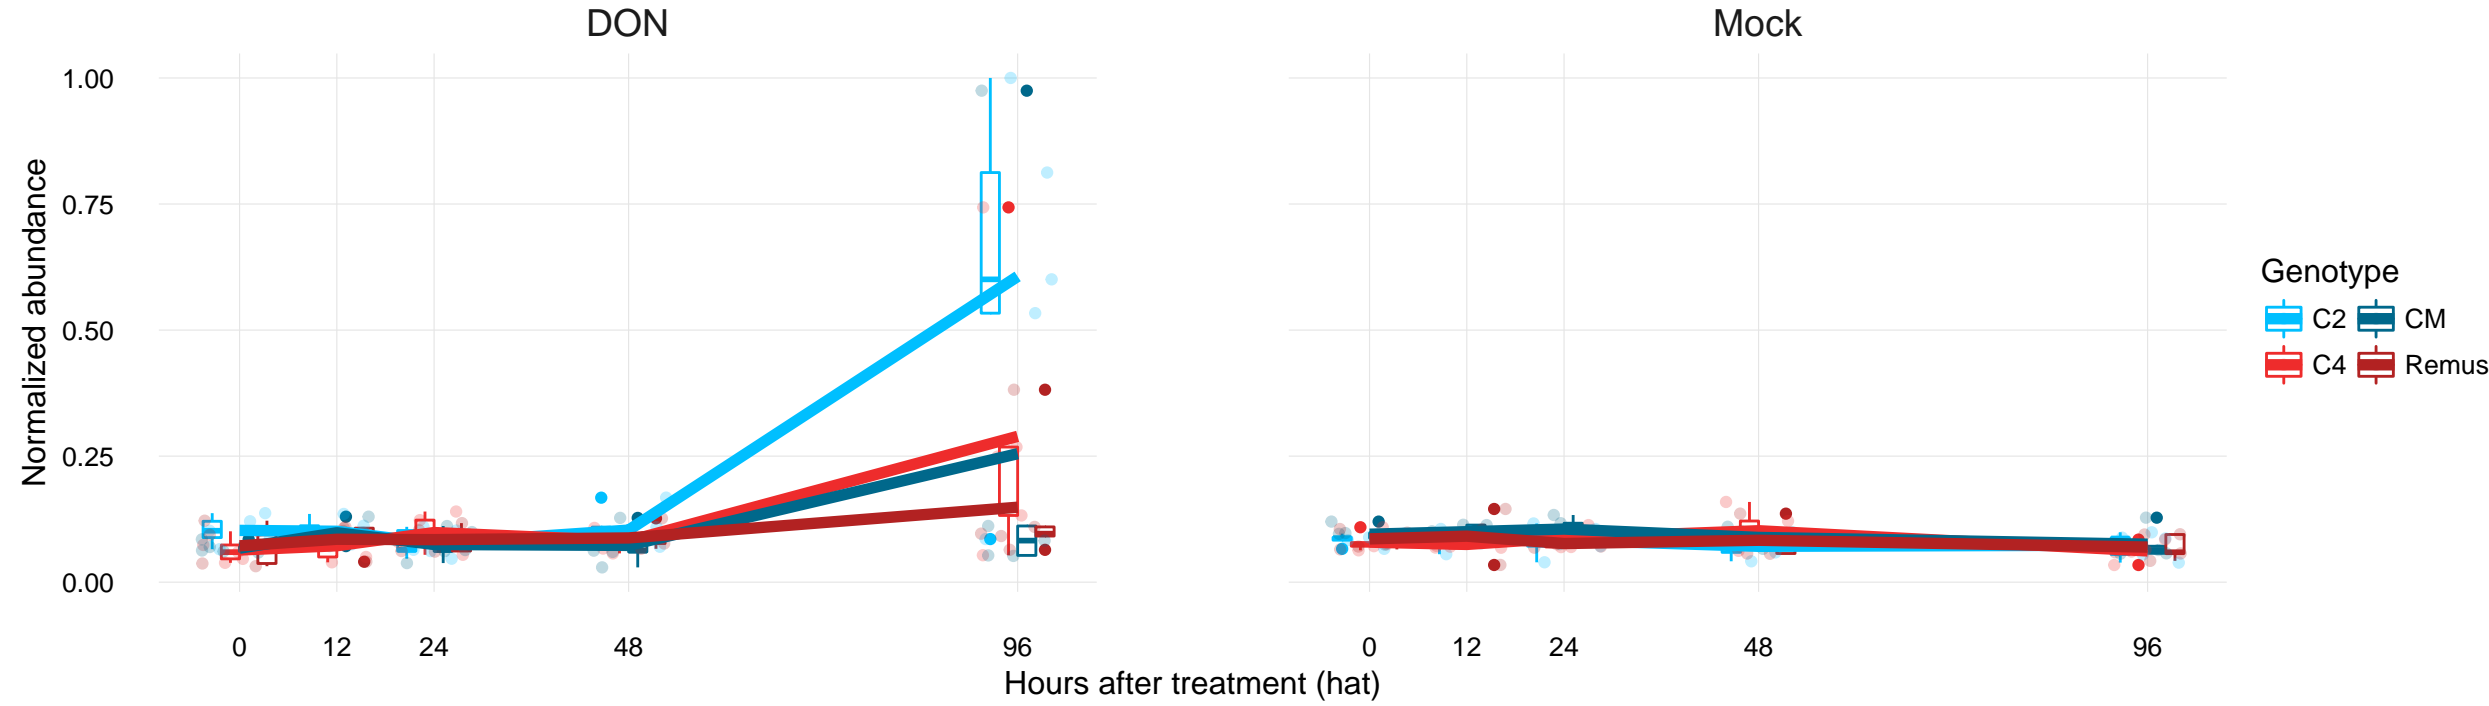

# FerSer

Identified metabolite (level 1)

|                |                          |
|----------------|--------------------------|
| MZ             | 353.1498                 |
| RT             | 16.43 min                |
| Normalization  | Directly via KPX samples |
| Cluster        | Cluster 1A               |
| Cn total / Phe | 20 / 9                   |

## C2, C4; different treatments

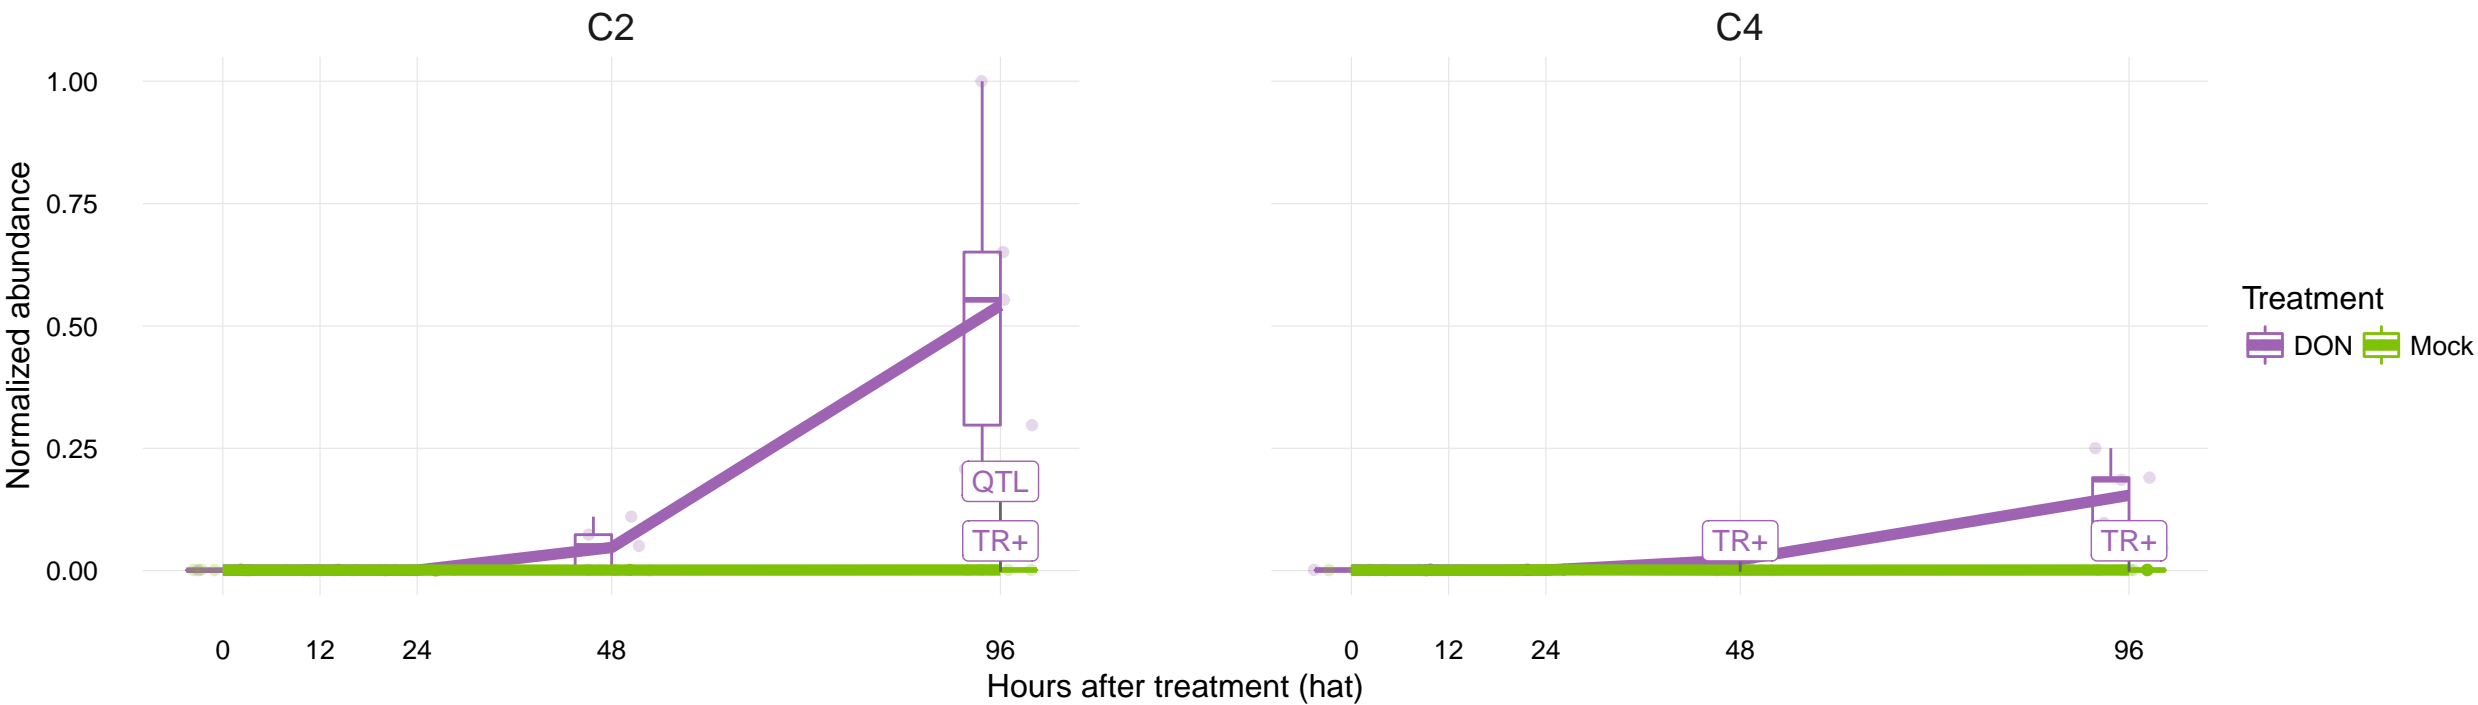

## DON, Mock; different genotypes

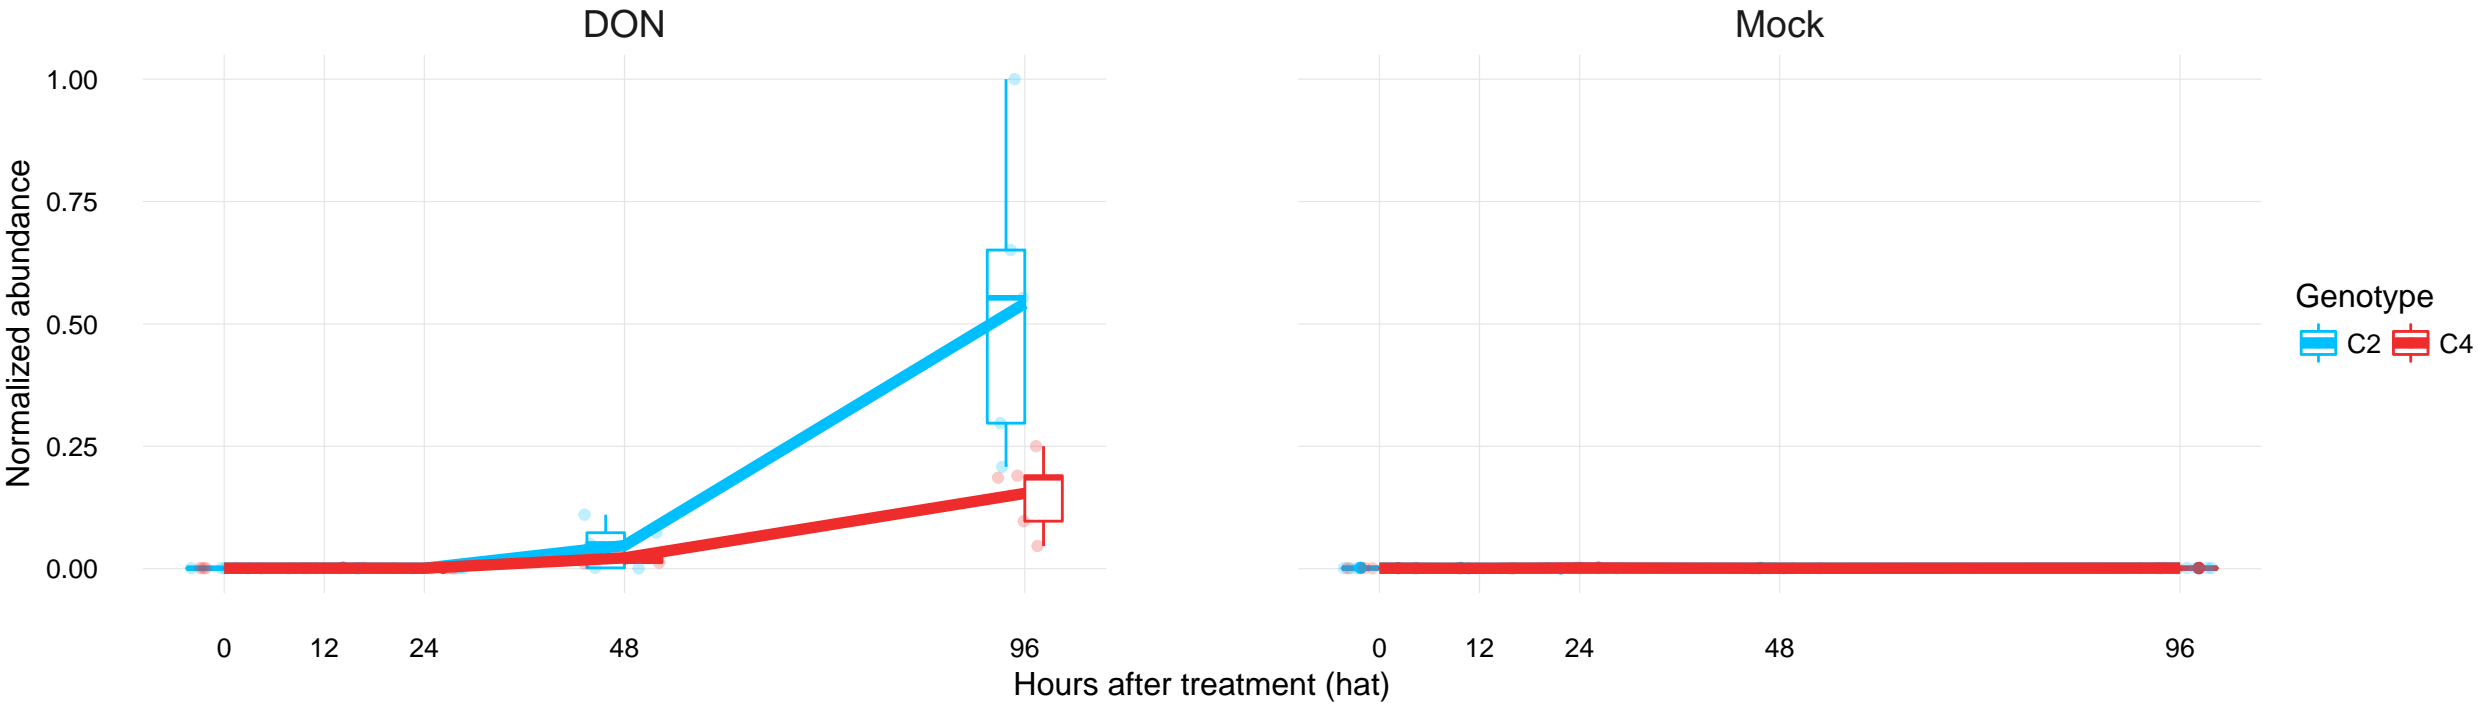

## CM, Remus; different treatments

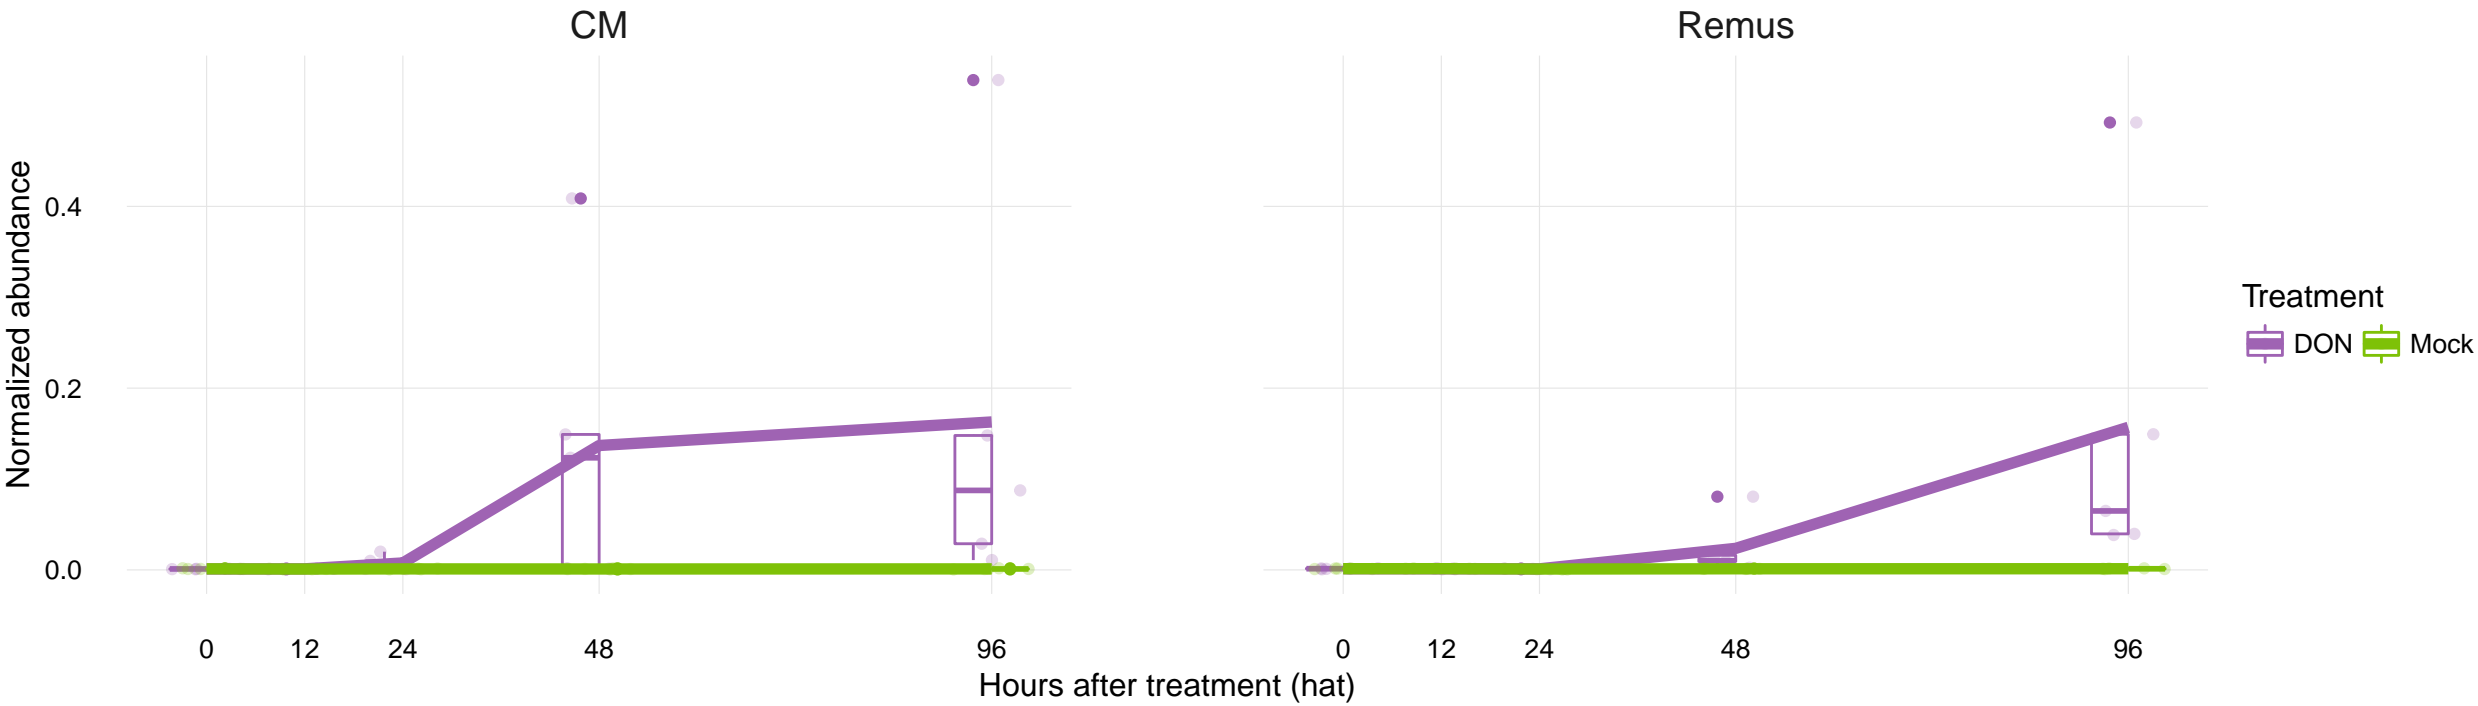

## DON, Mock; all four genotypes

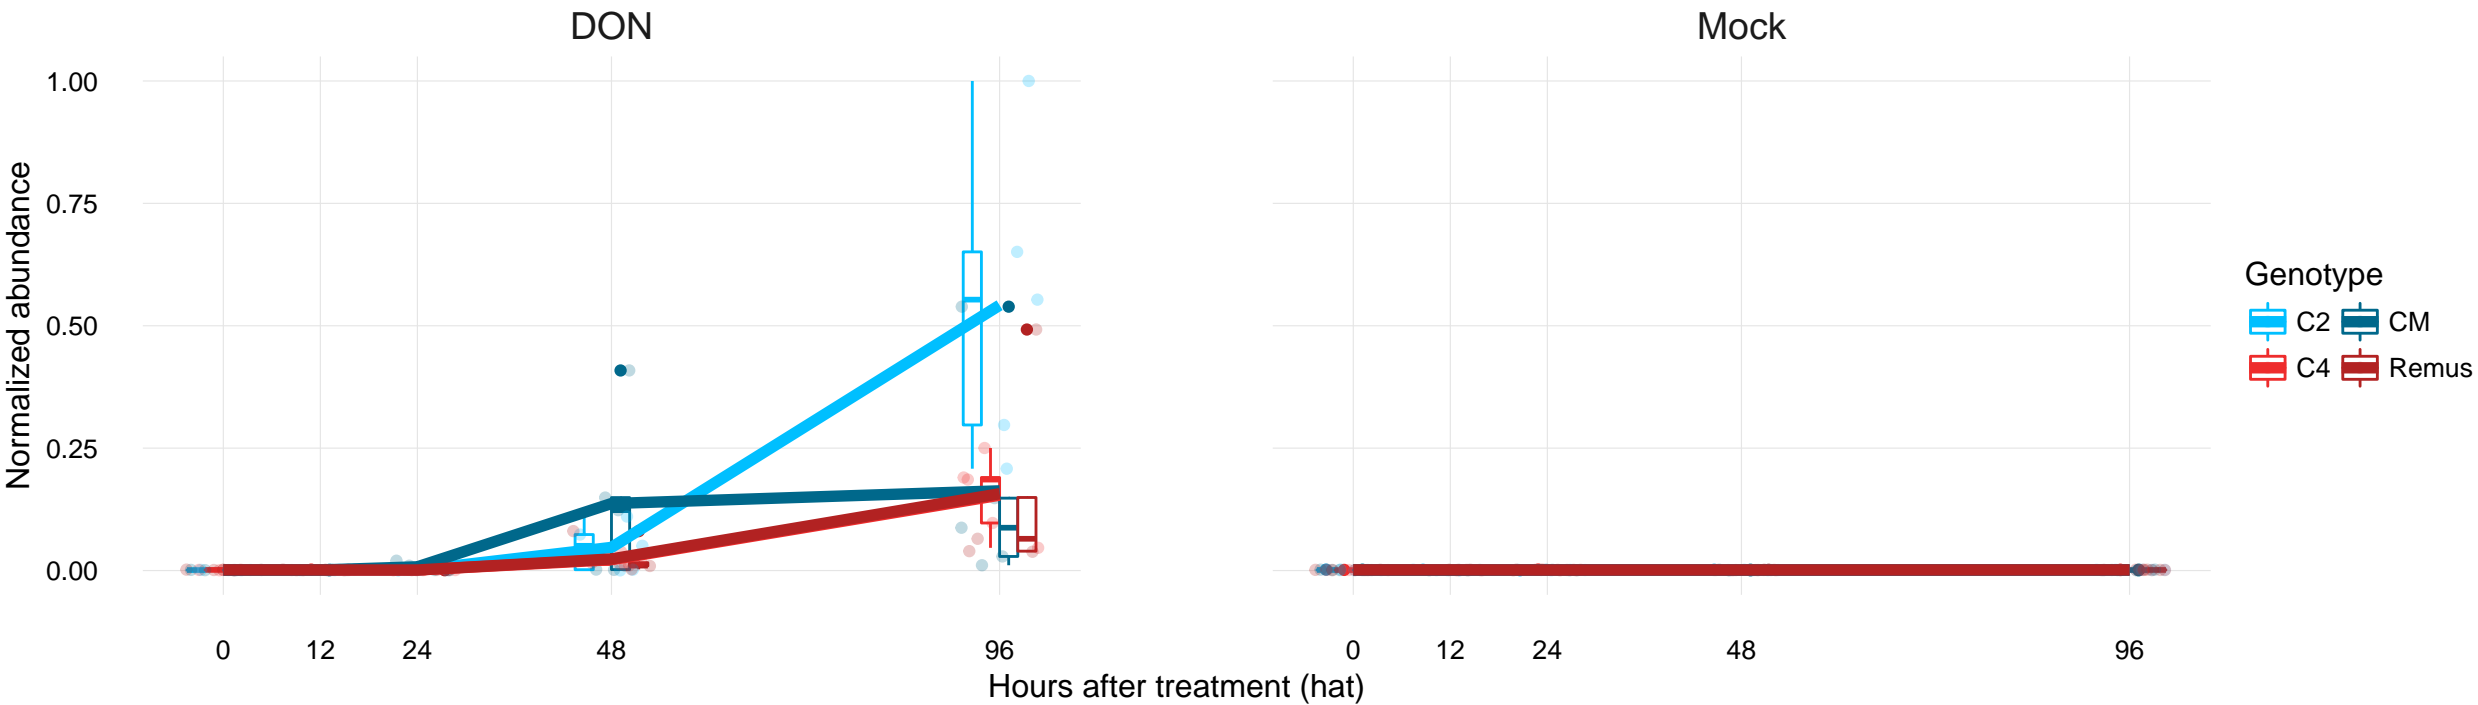

# A.118

Annotated as HCAA (diHCAA)  
(4 database hits)

|                |                                                |
|----------------|------------------------------------------------|
| MZ             | 441.202                                        |
| RT             | 18.66 min                                      |
| Normalization  | Indirectly via surrogate<br>in the KPX samples |
| Cluster        | Cluster 1A                                     |
| Cn total / Phe | 24 / 18                                        |

## C2, C4; different treatments

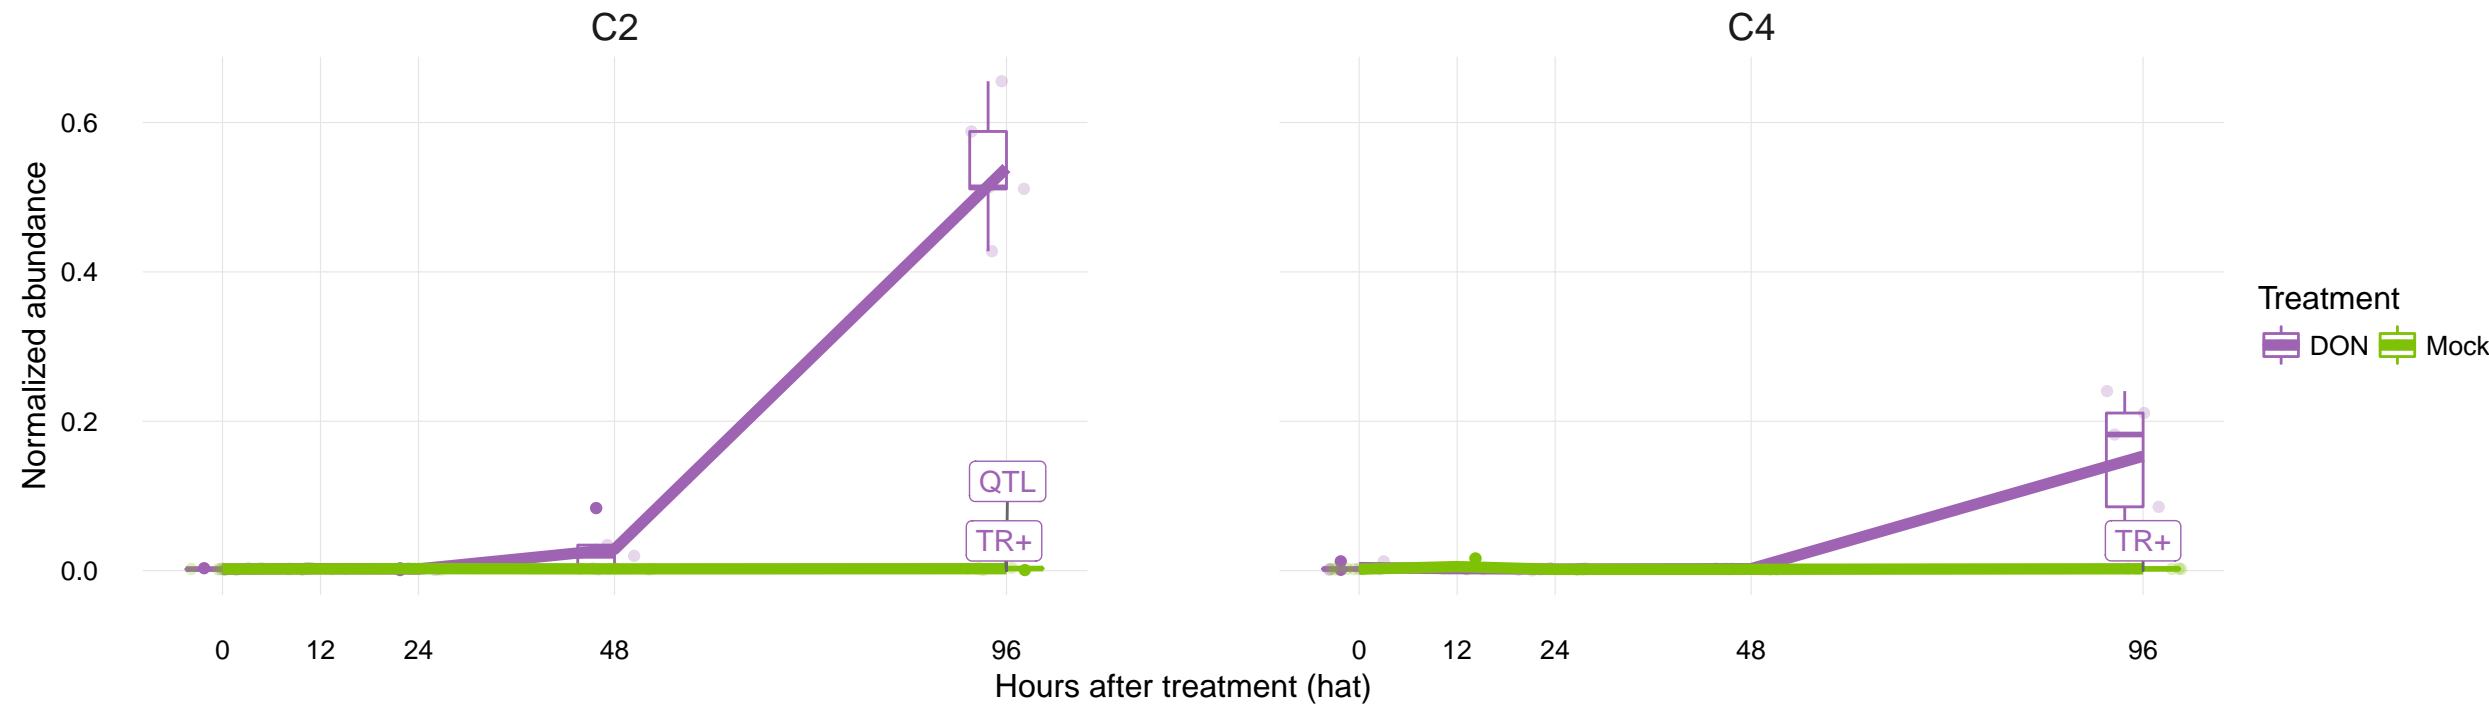

## DON, Mock; different genotypes

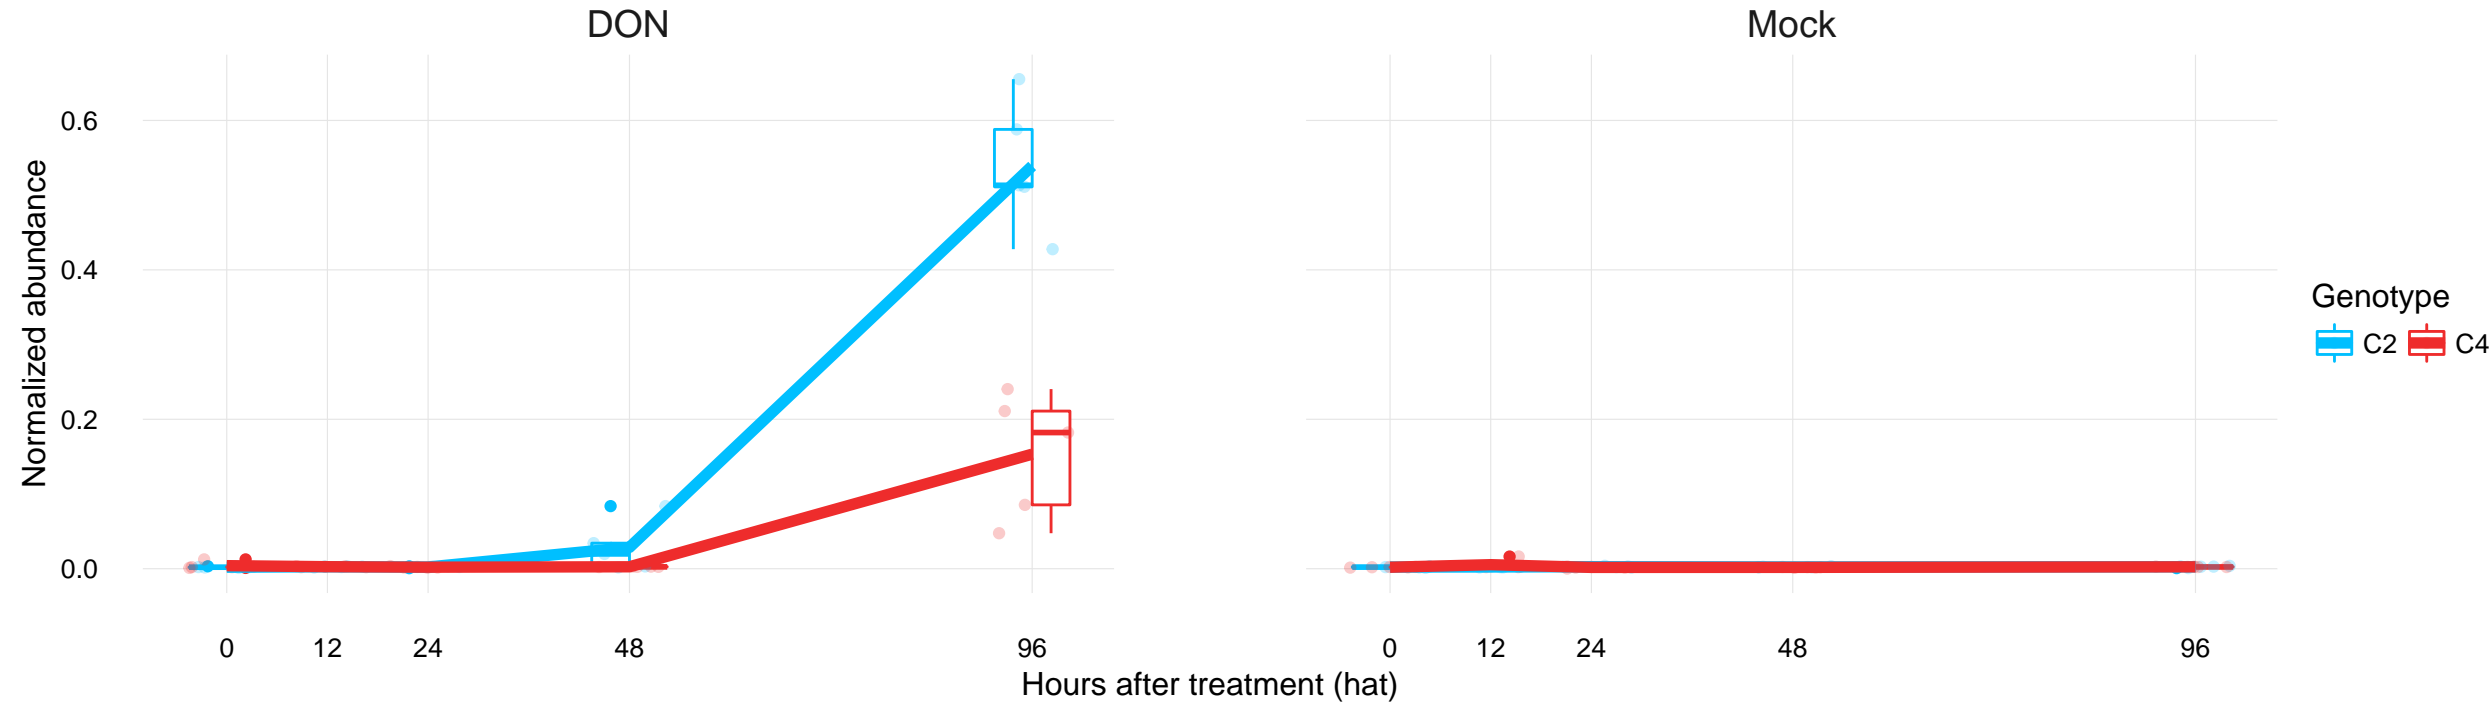

## CM, Remus; different treatments

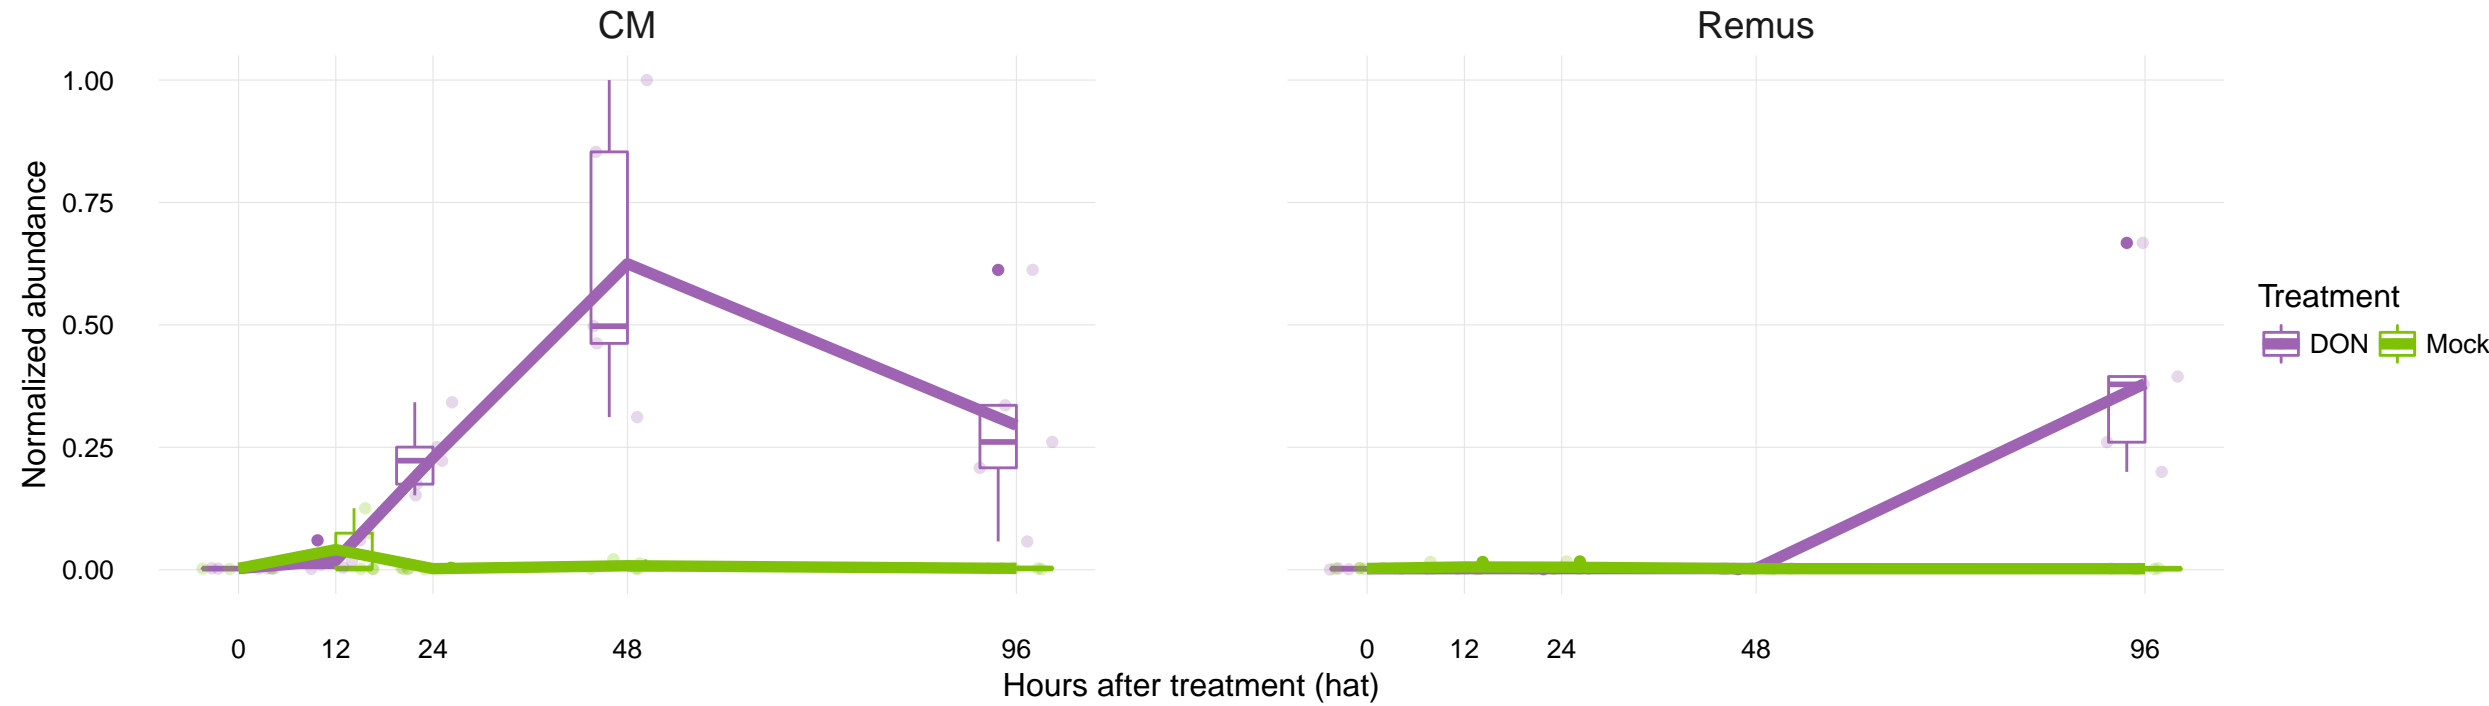

## DON, Mock; all four genotypes

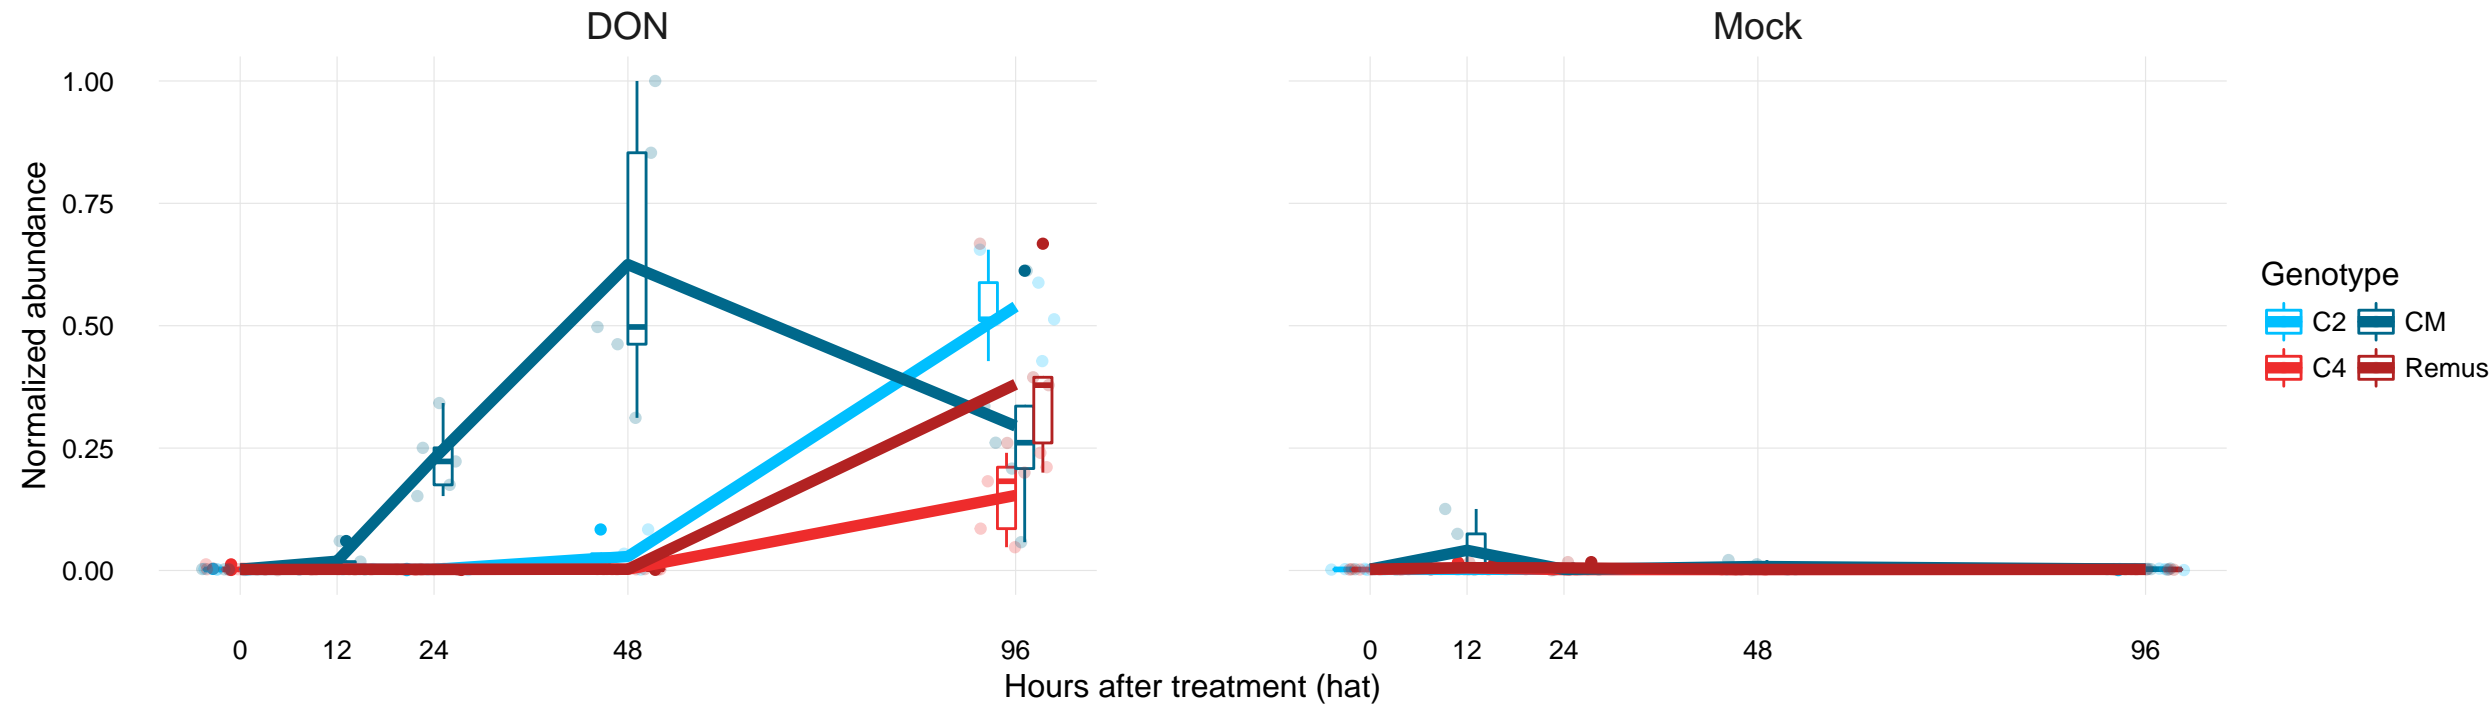

# U.11

Unknown Phe-derived wheat-metabolite

|                |                                             |
|----------------|---------------------------------------------|
| MZ             | 427.1865                                    |
| RT             | 16.92 min                                   |
| Normalization  | Indirectly via surrogate in the KPX samples |
| Cluster        | Cluster 1A                                  |
| Cn total / Phe | 28 / 9                                      |

## C2, C4; different treatments

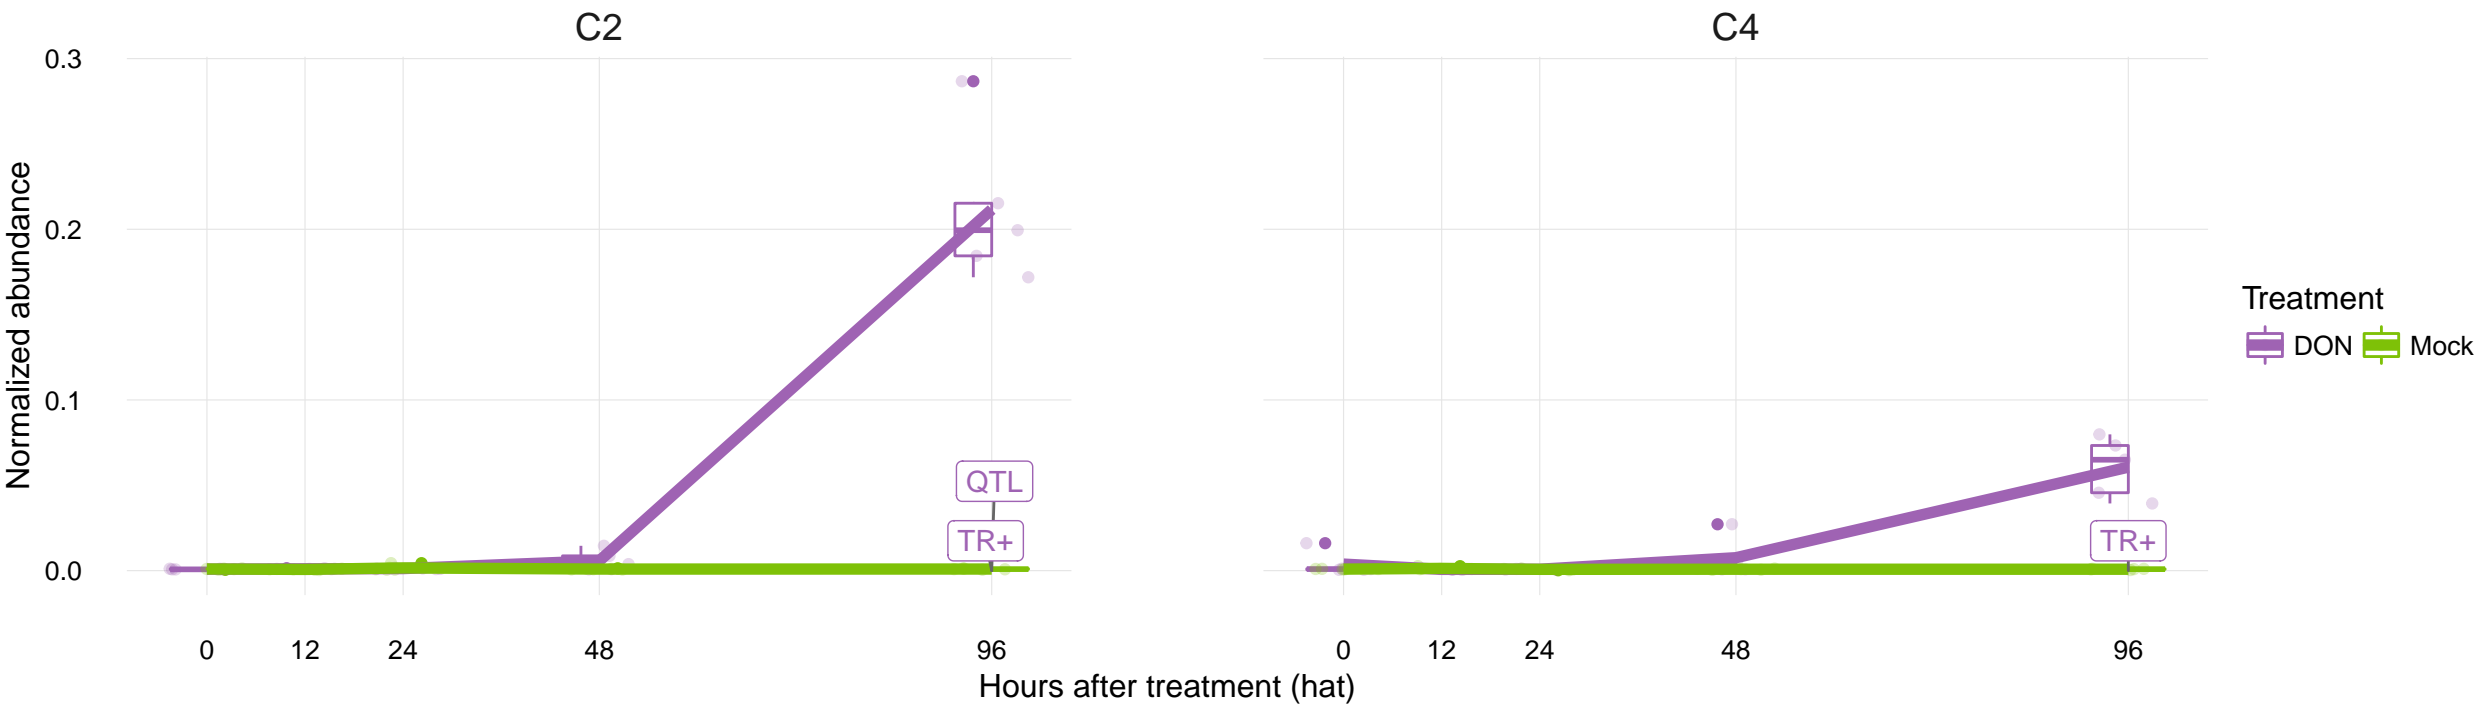

## DON, Mock; different genotypes

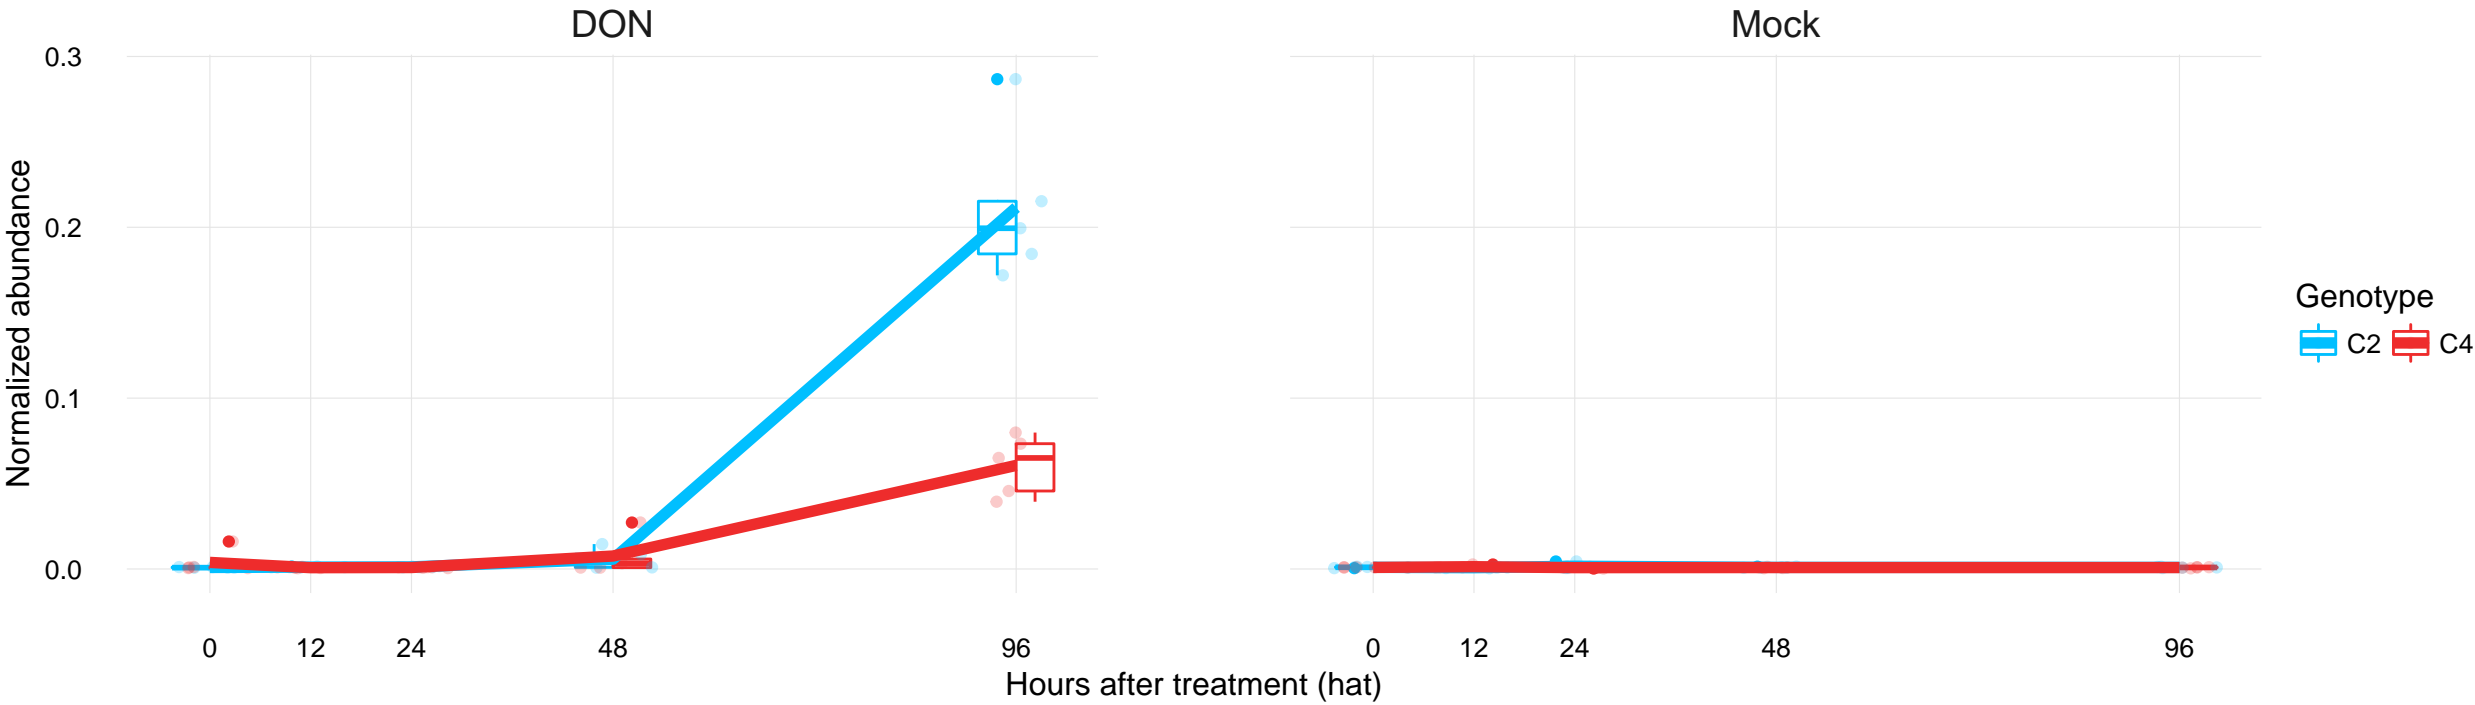

## CM, Remus; different treatments

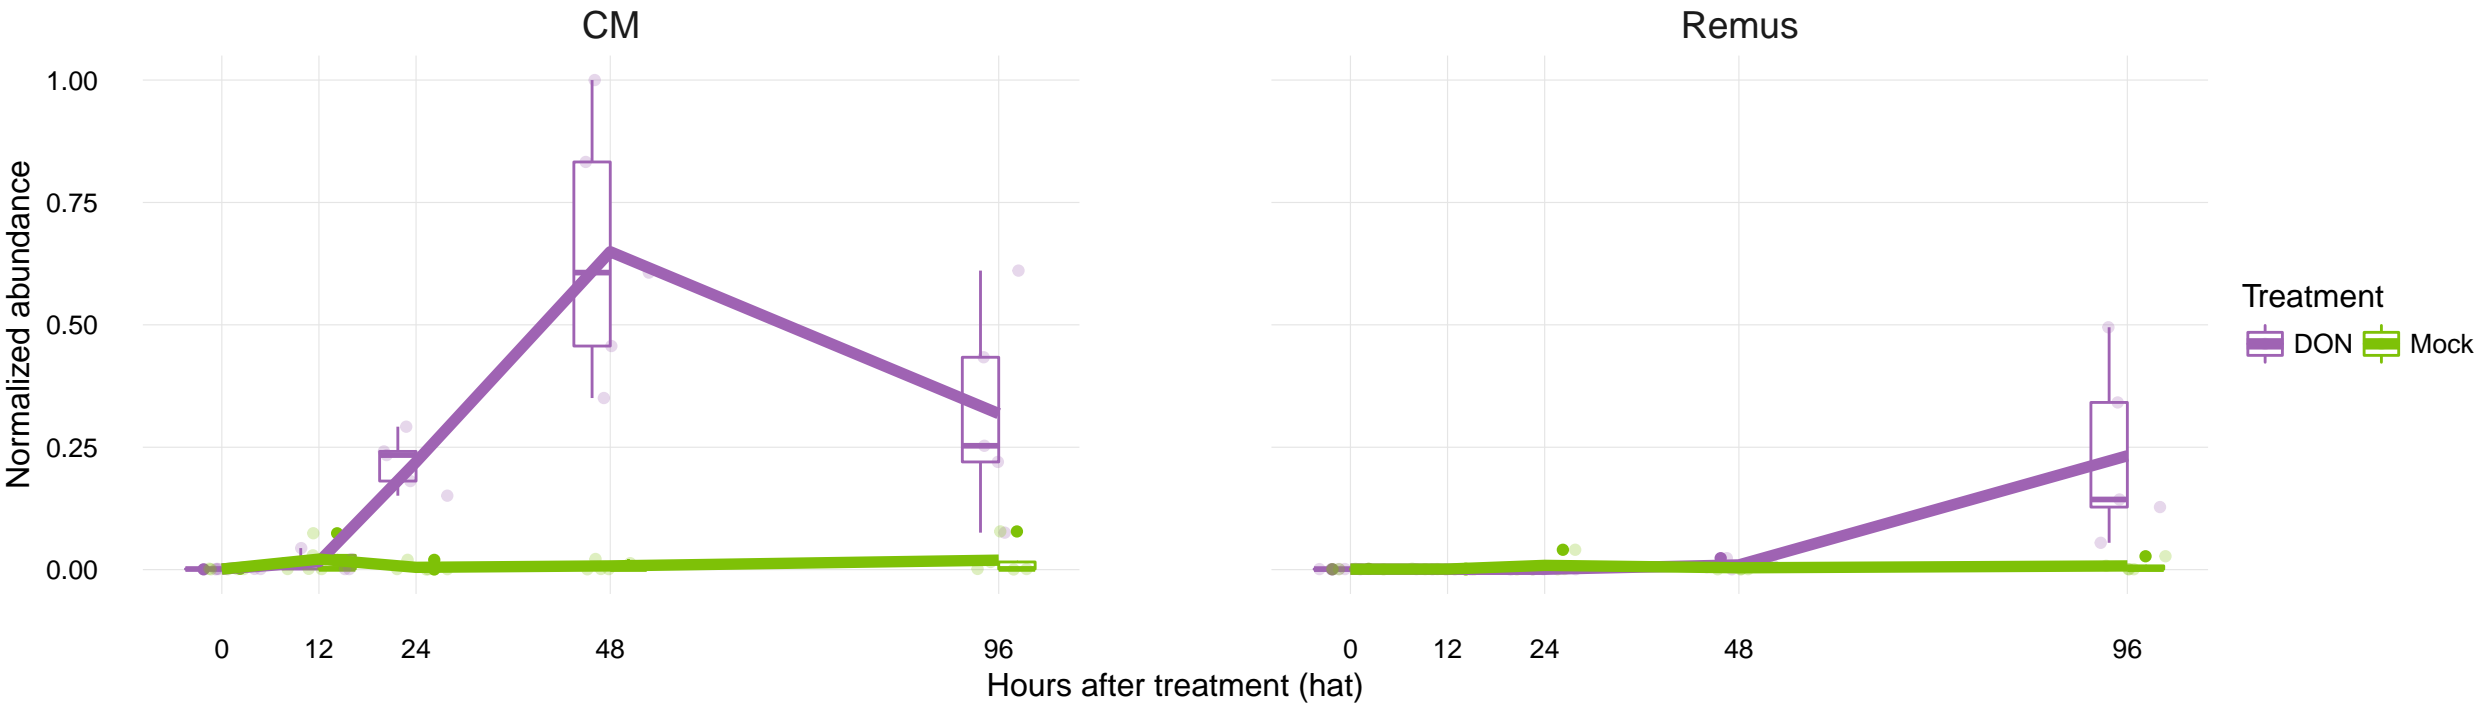

## DON, Mock; all four genotypes

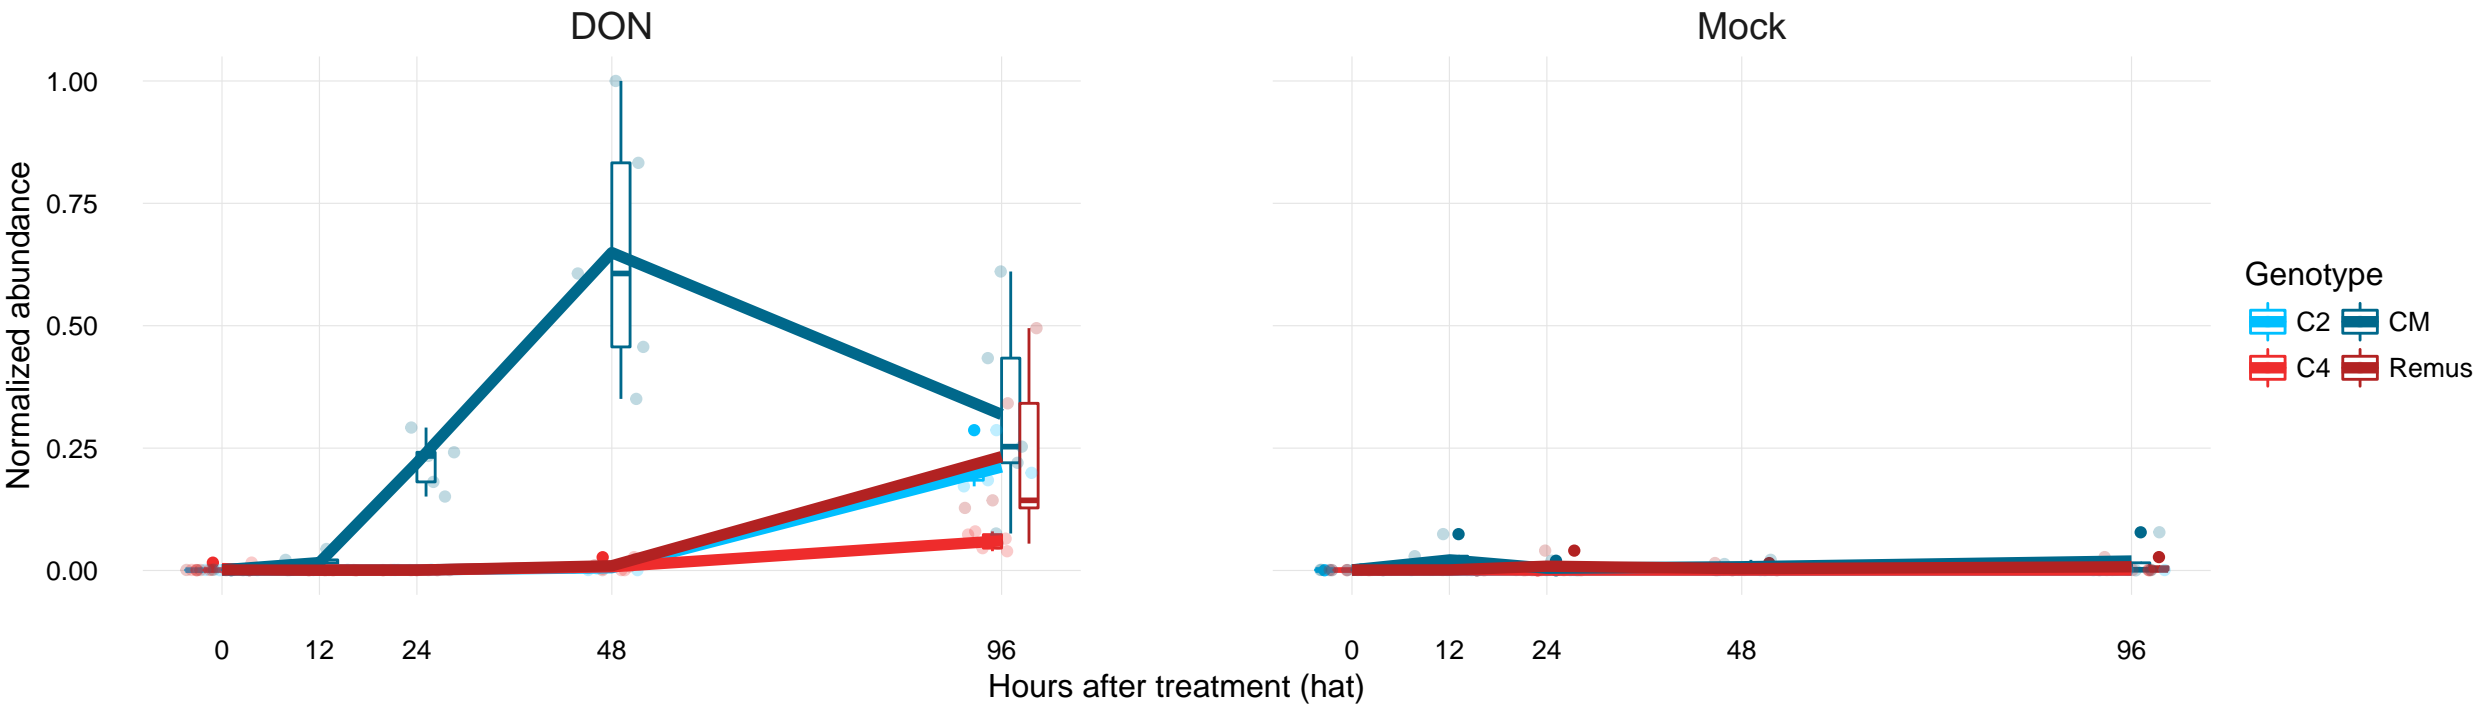

# A.116

Annotated as HCAA (diHCAA)  
(2 database hits)

|                |                          |
|----------------|--------------------------|
| MZ             | 411.1916                 |
| RT             | 18.49 min                |
| Normalization  | Directly via KPX samples |
| Cluster        | Cluster 1A               |
| Cn total / Phe | 23 / 18                  |

## C2, C4; different treatments

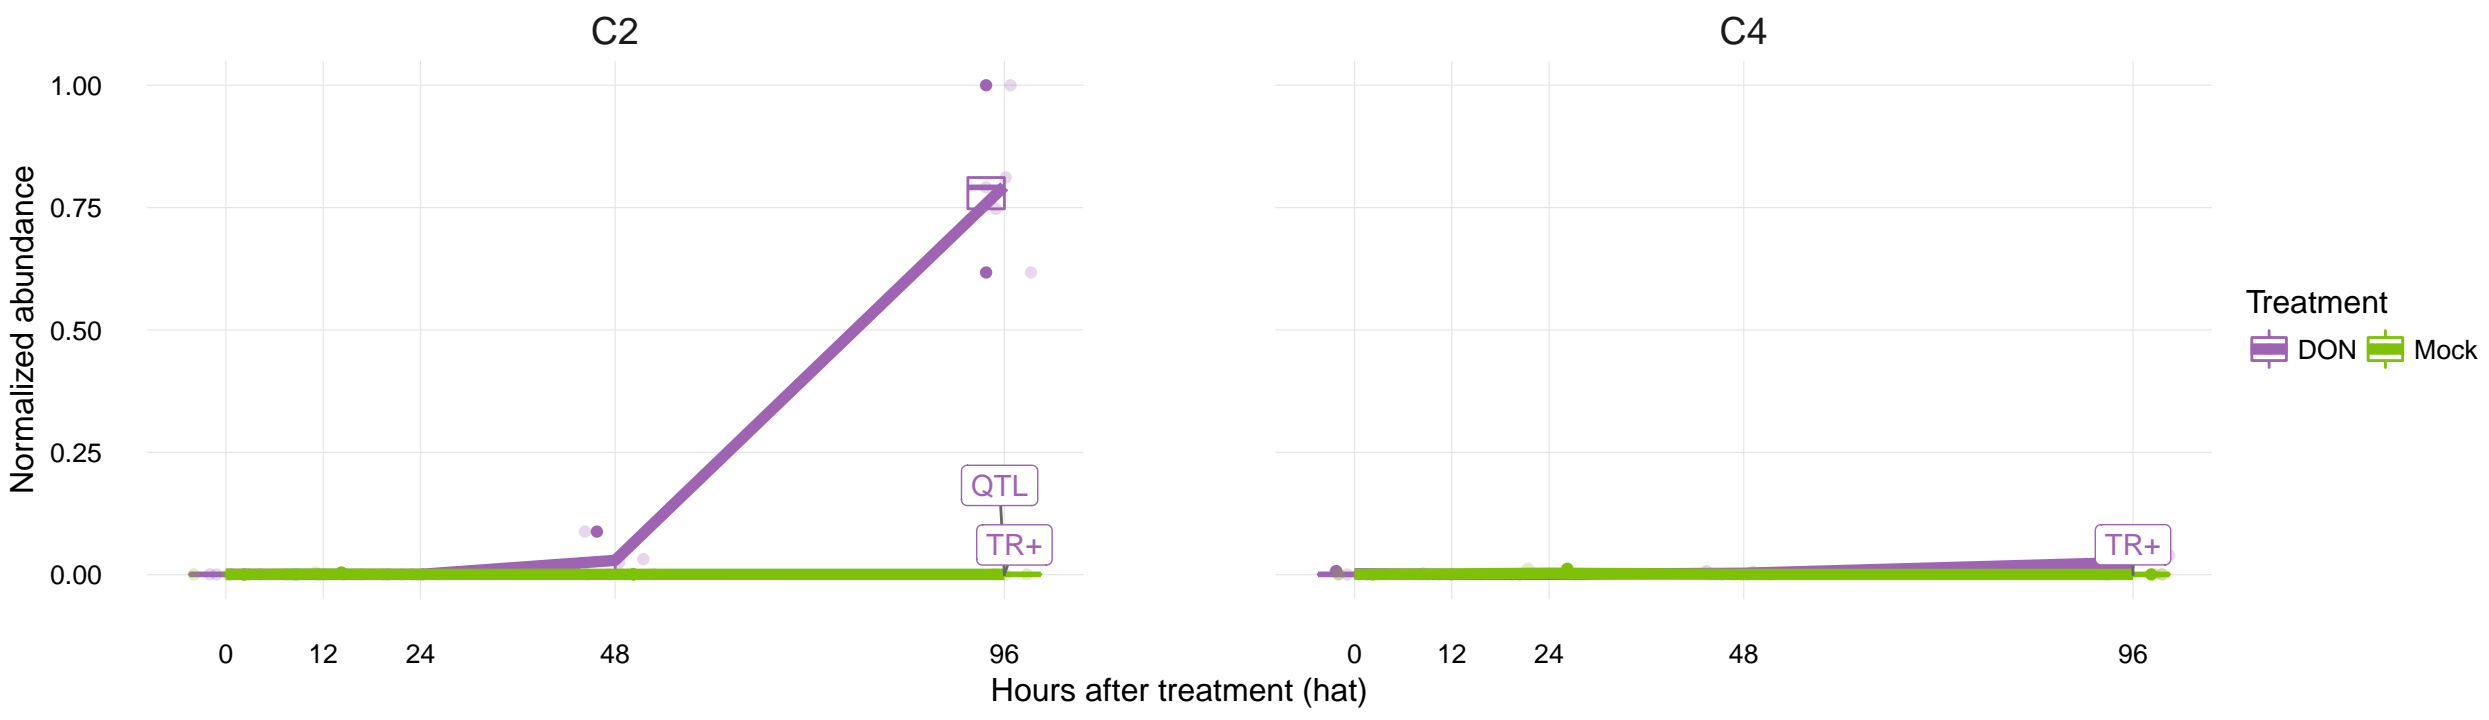

## DON, Mock; different genotypes

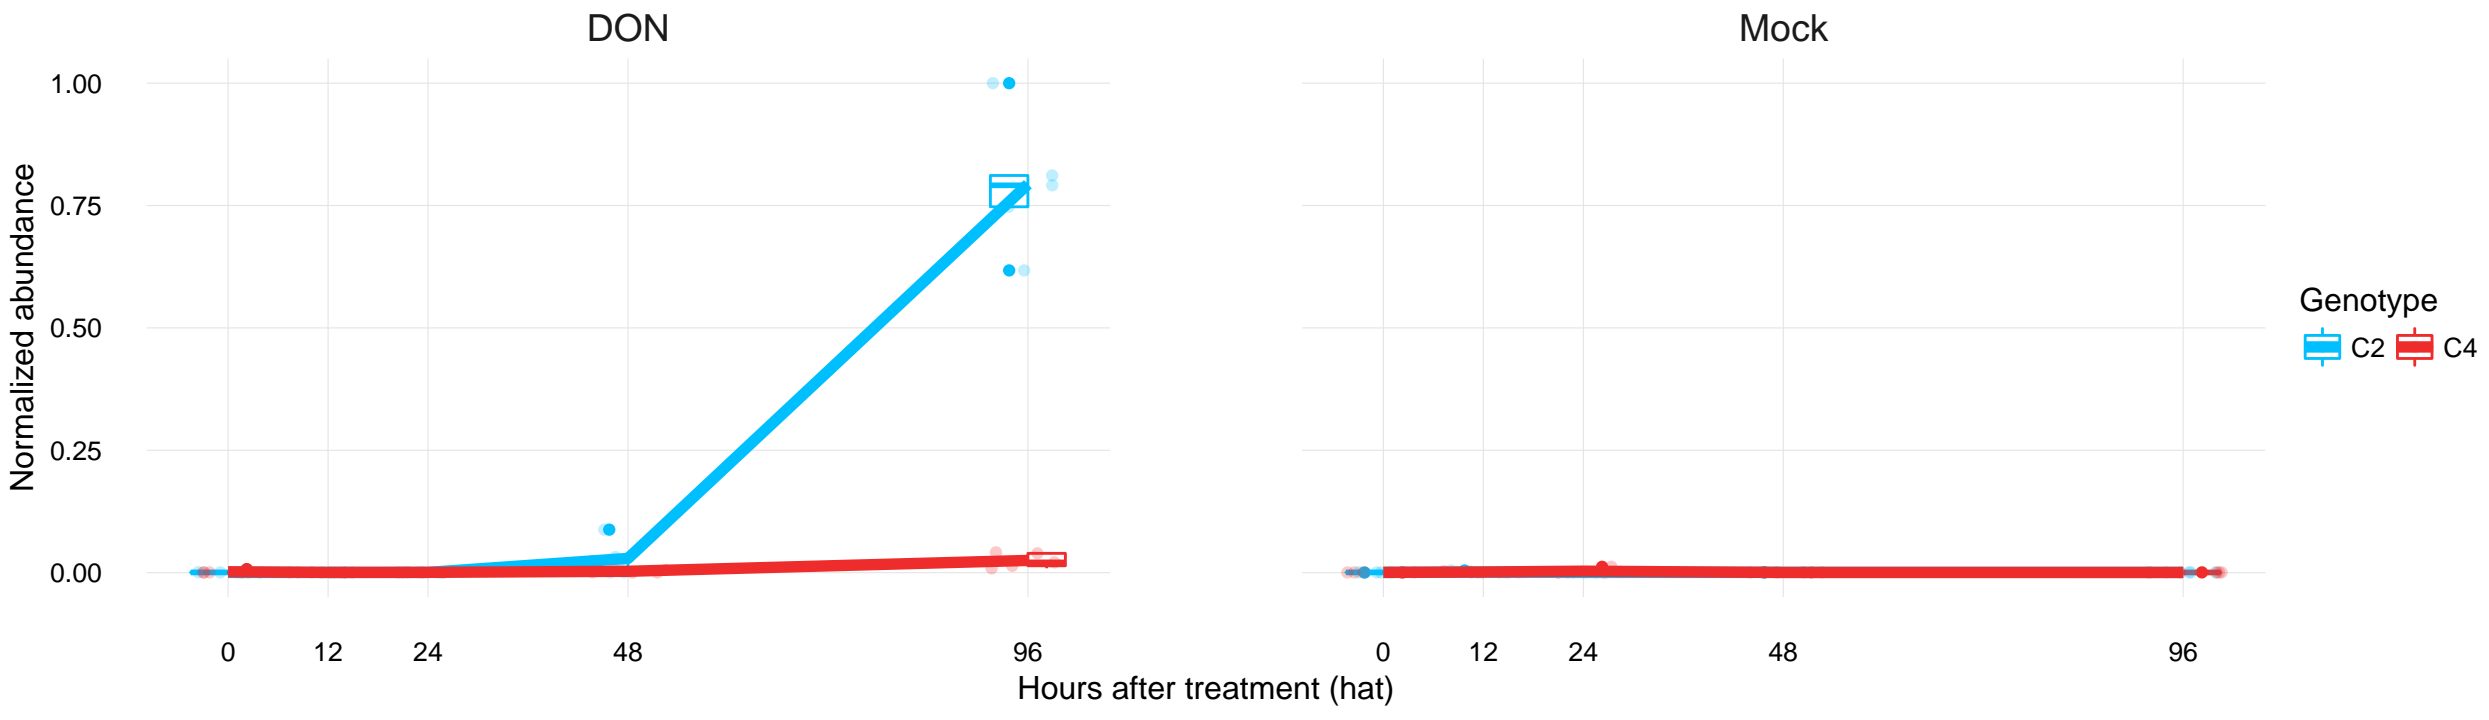

## CM, Remus; different treatments

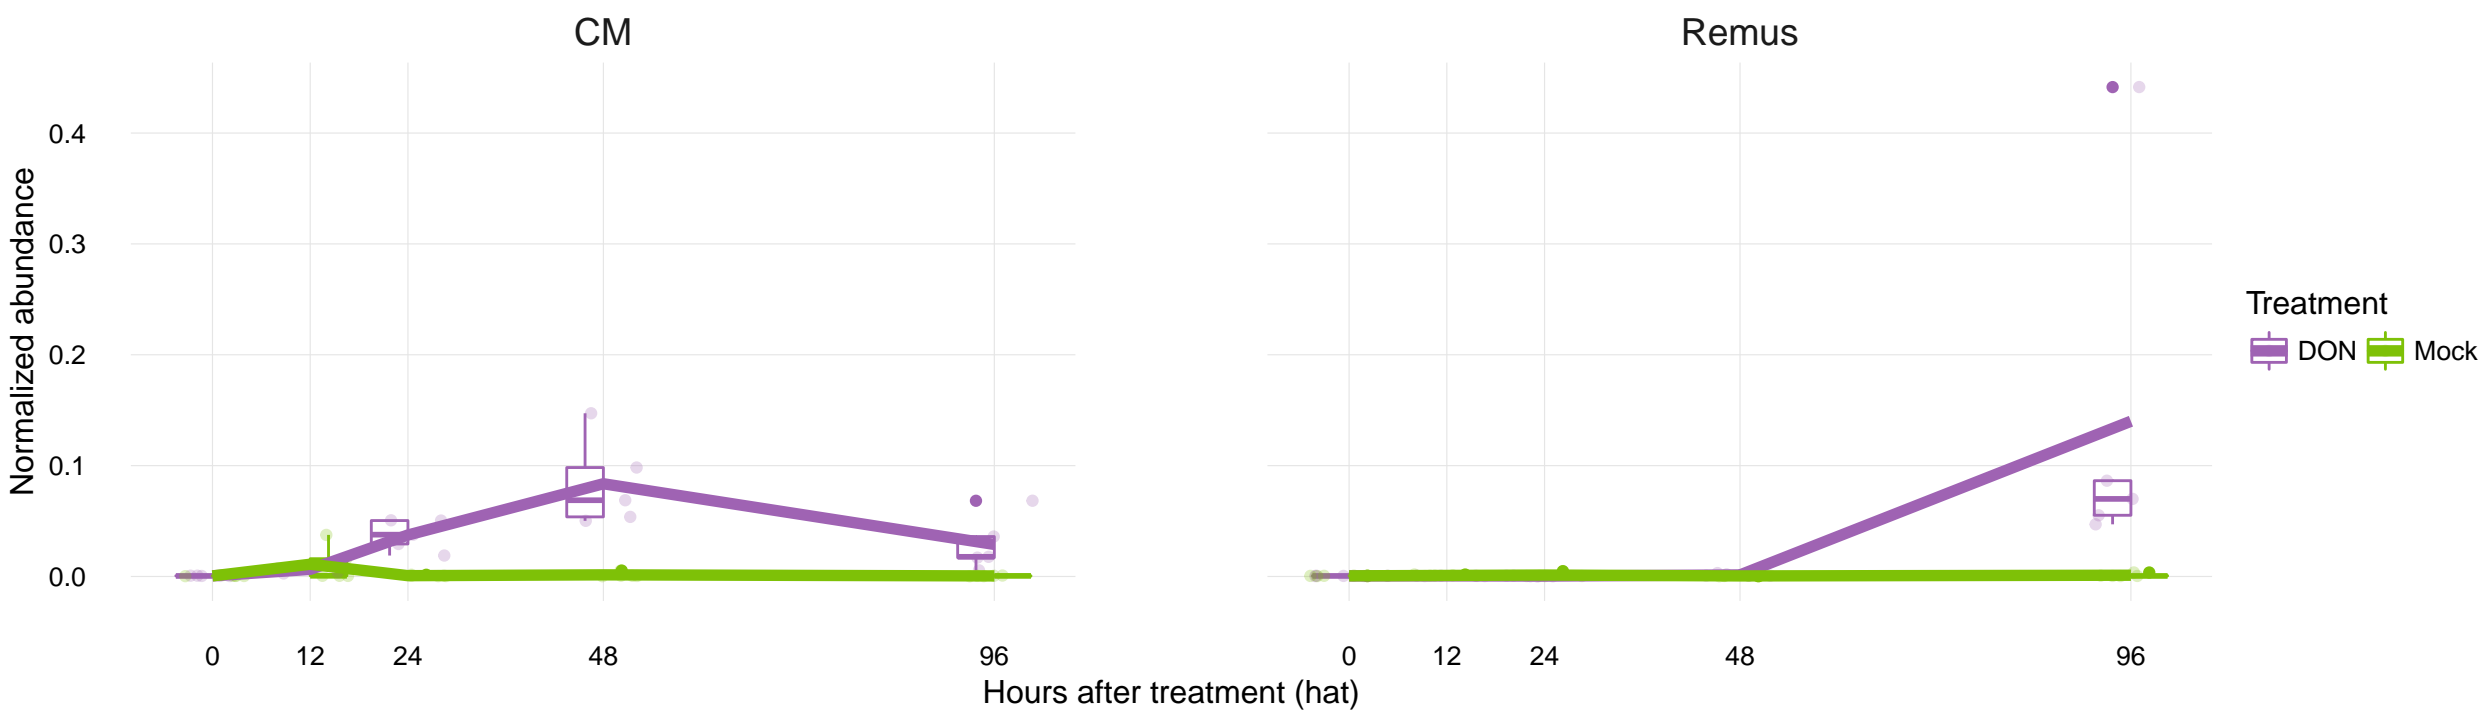

## DON, Mock; all four genotypes

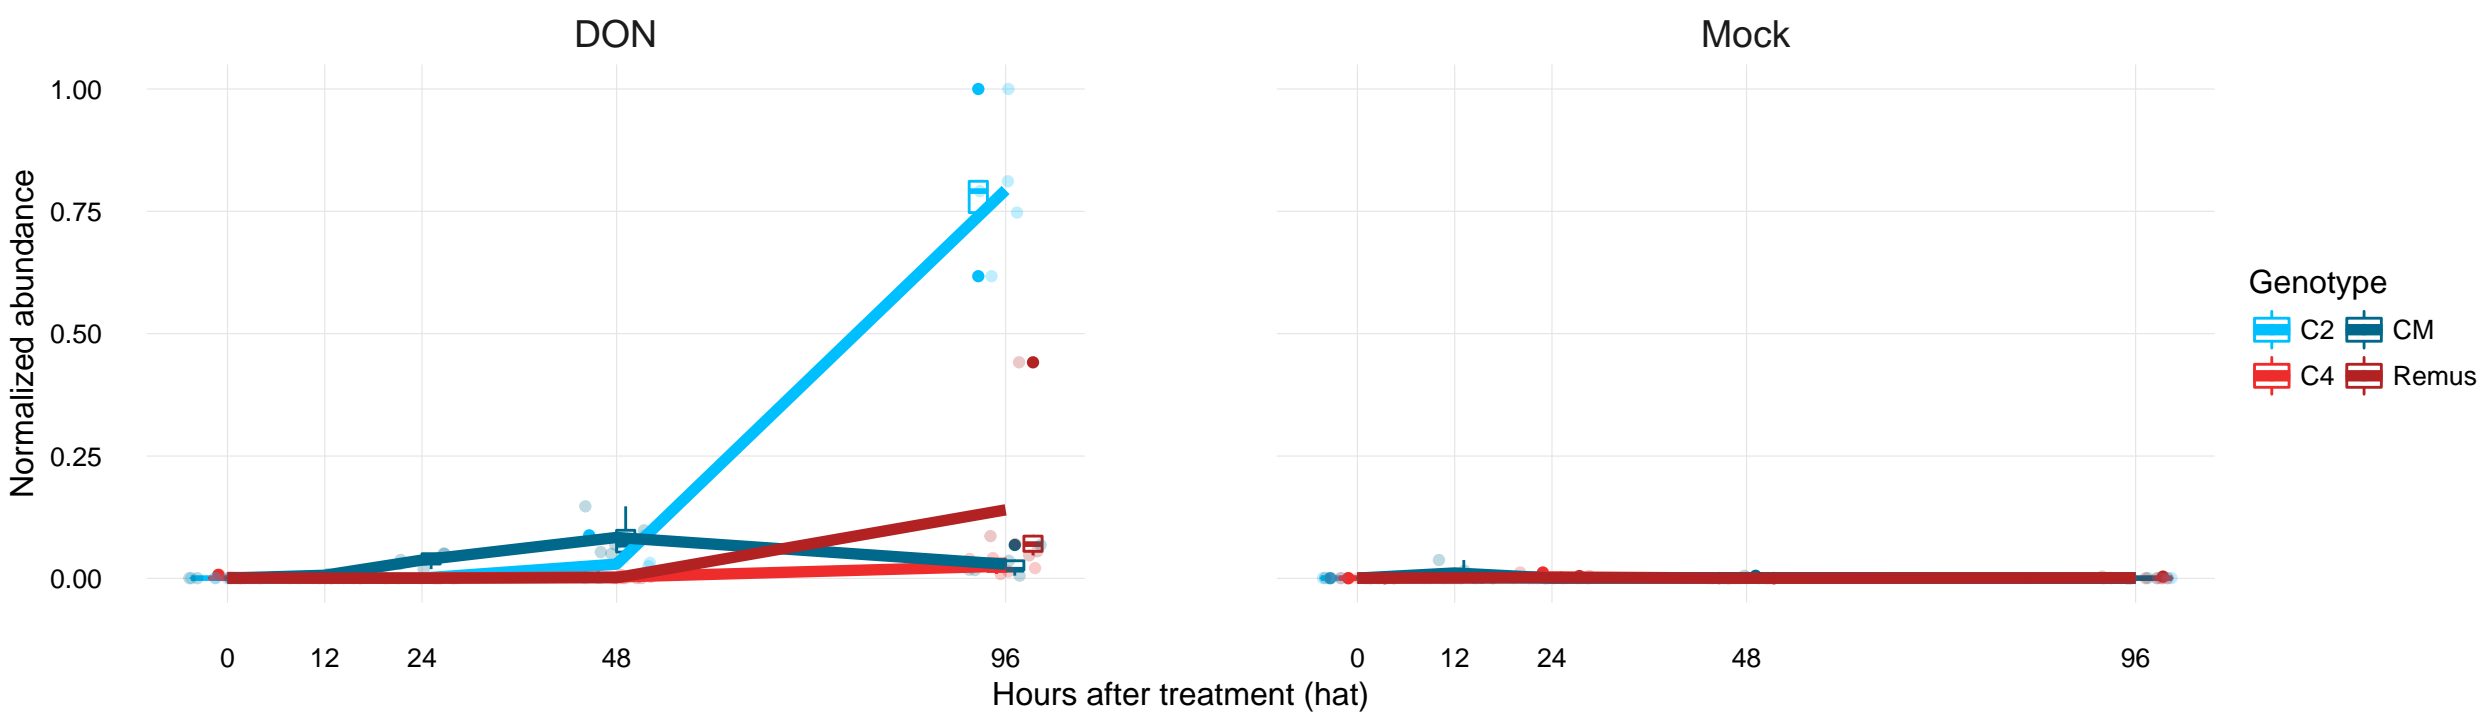

# A.16

Annotated as HCAA  
(2 database hits)

|                |                          |
|----------------|--------------------------|
| MZ             | 251.1393                 |
| RT             | 6.95 min                 |
| Normalization  | Directly via KPX samples |
| Cluster        | Cluster 1A               |
| Cn total / Phe | 13 / 9                   |

## C2, C4; different treatments

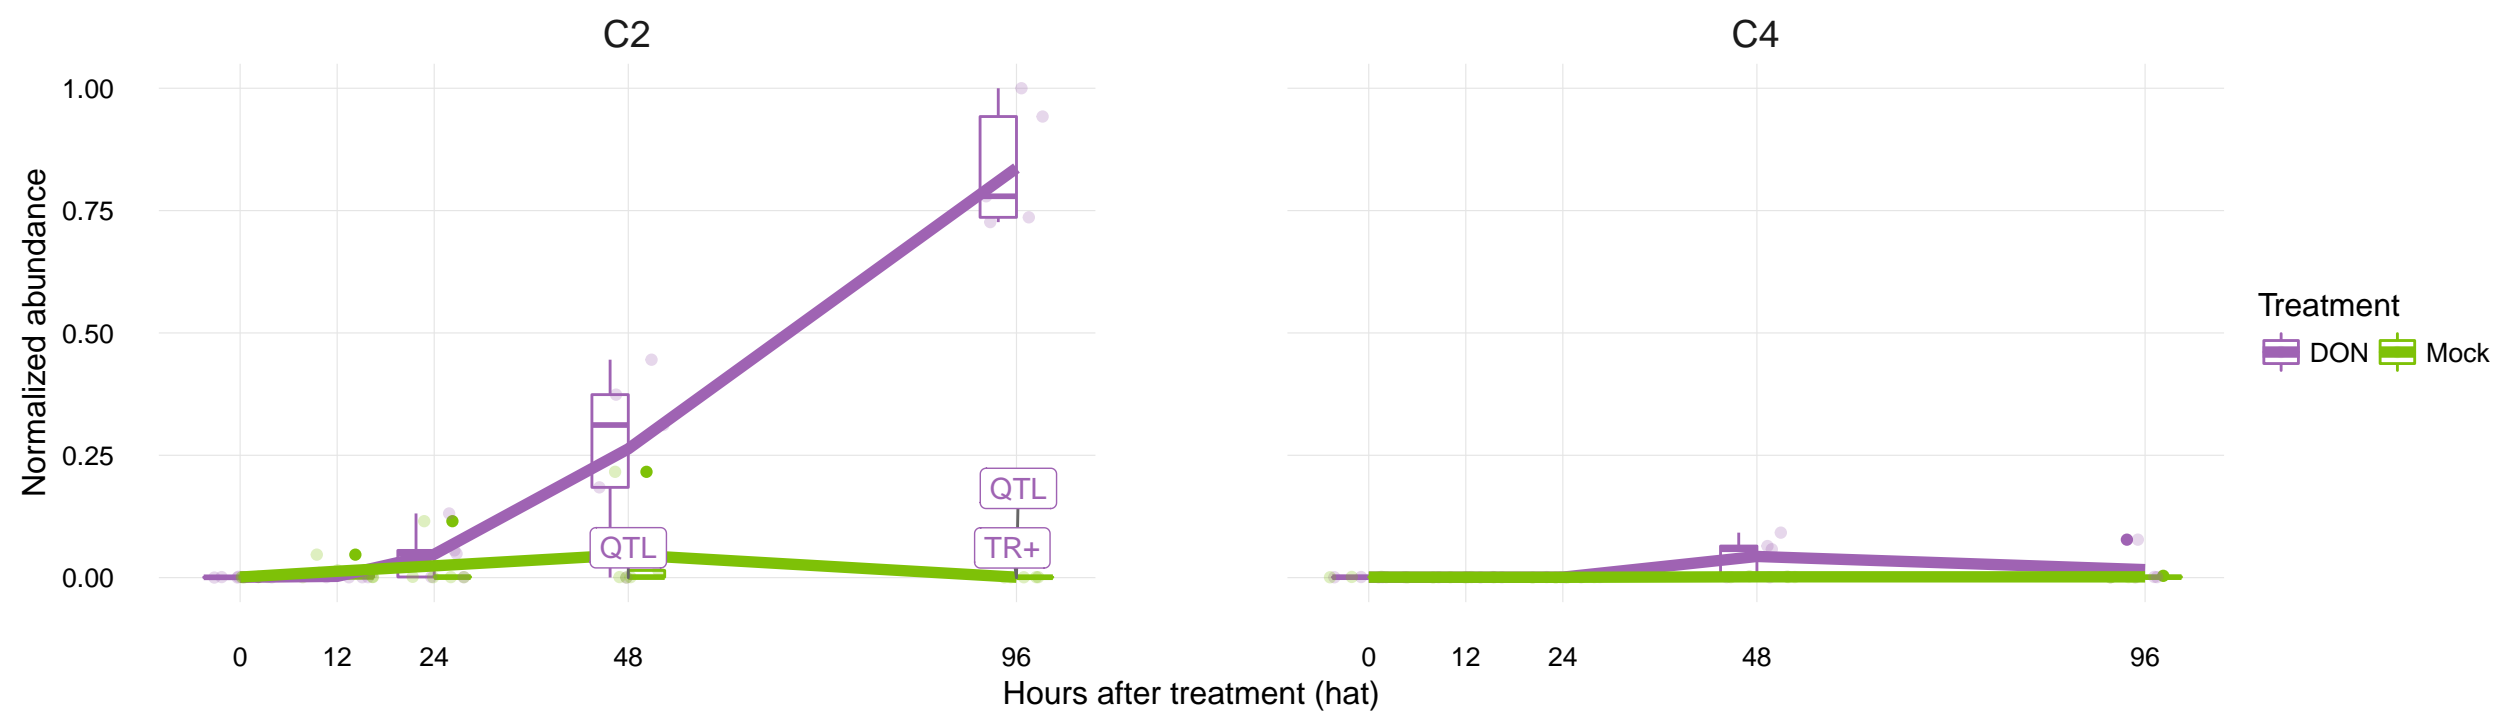

## DON, Mock; different genotypes

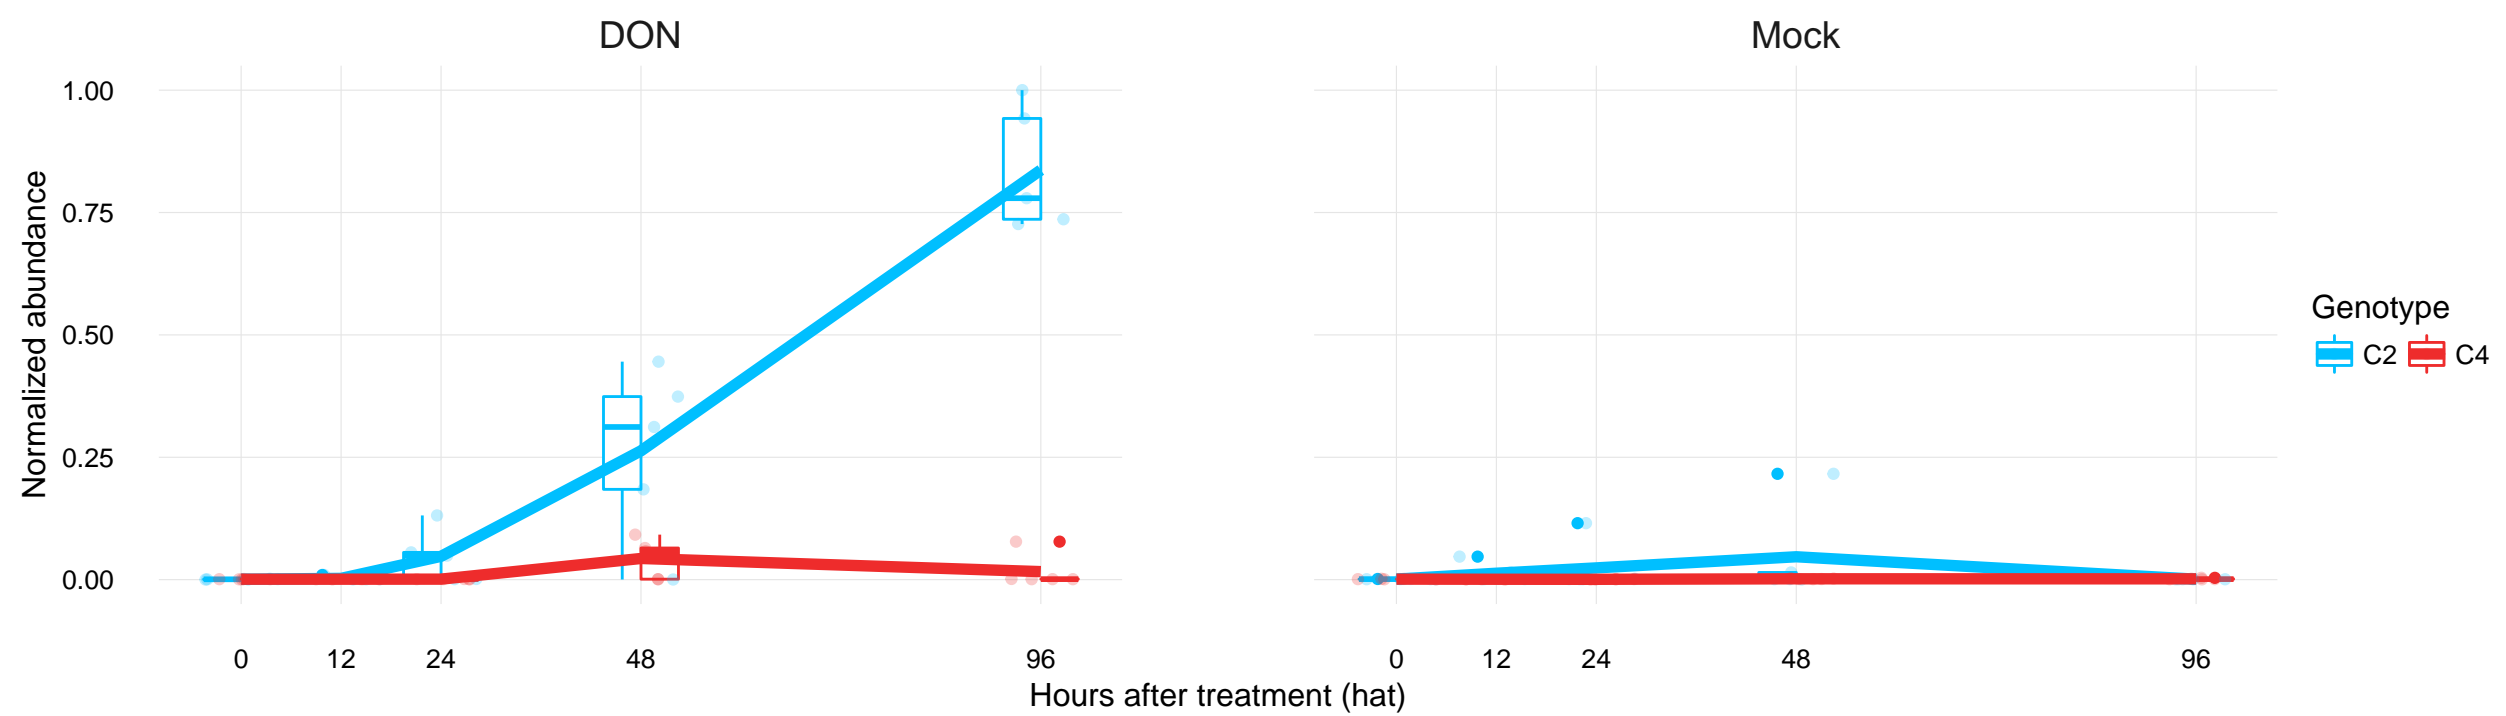

## CM, Remus; different treatments

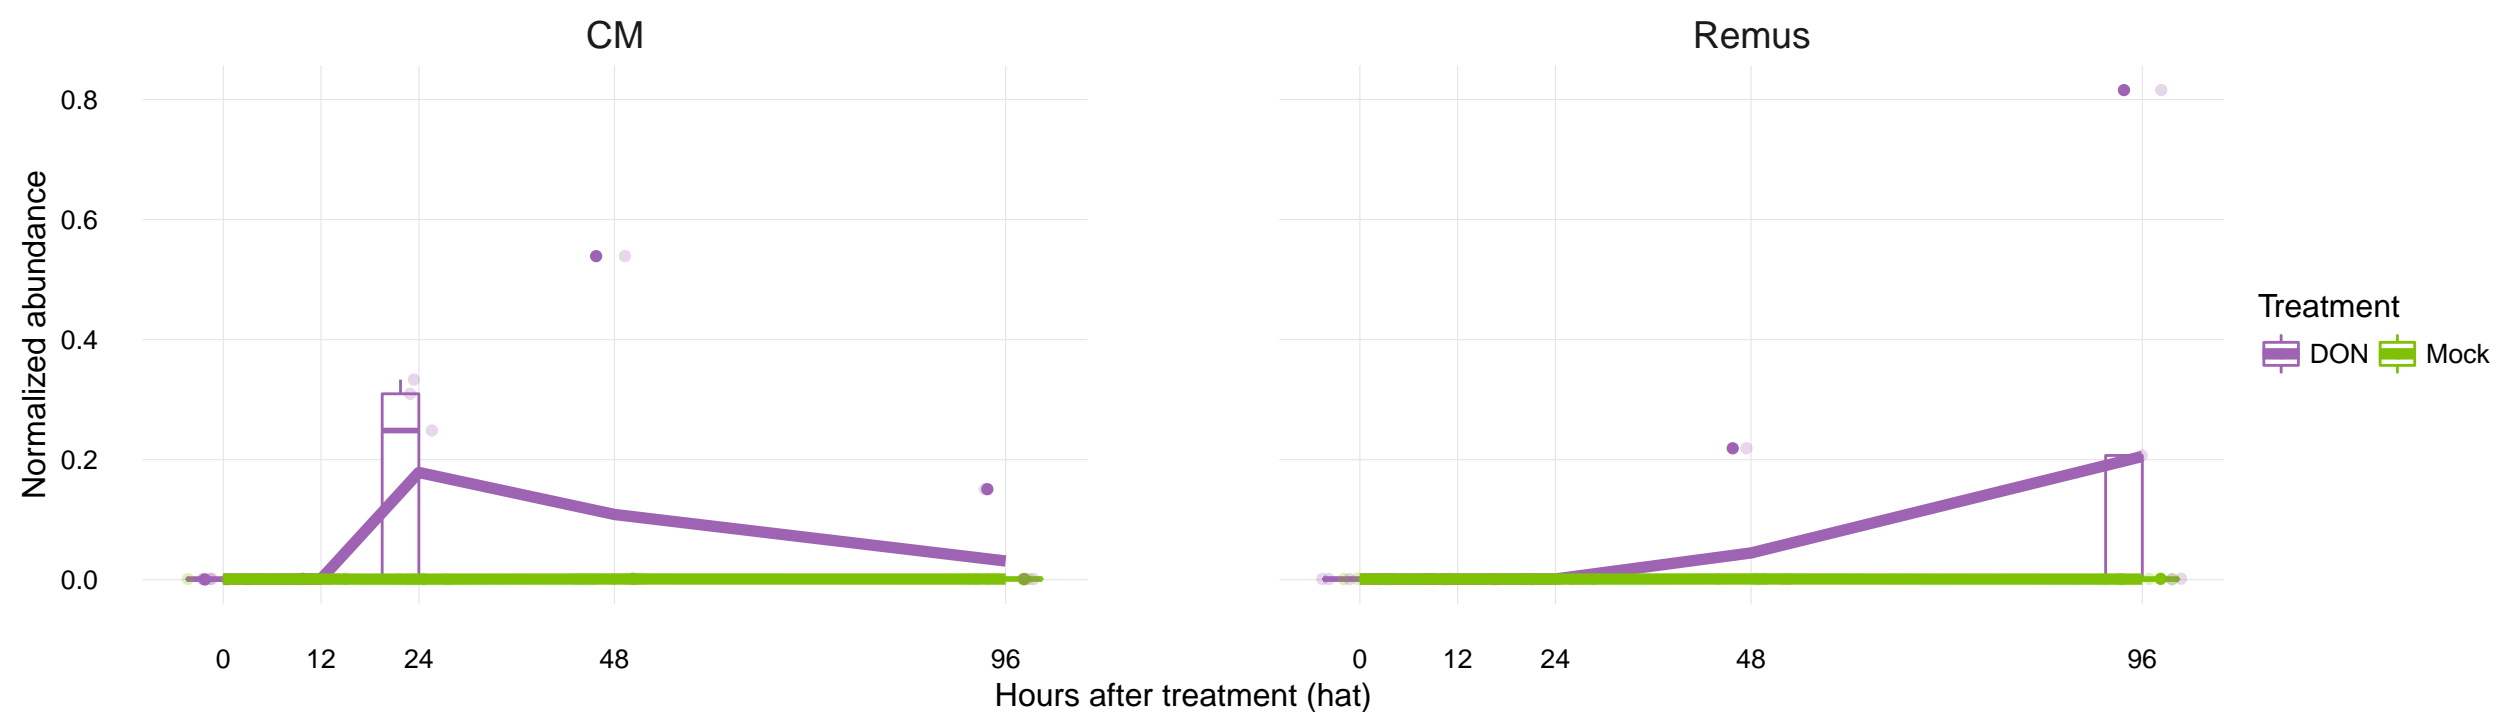

## DON, Mock; all four genotypes

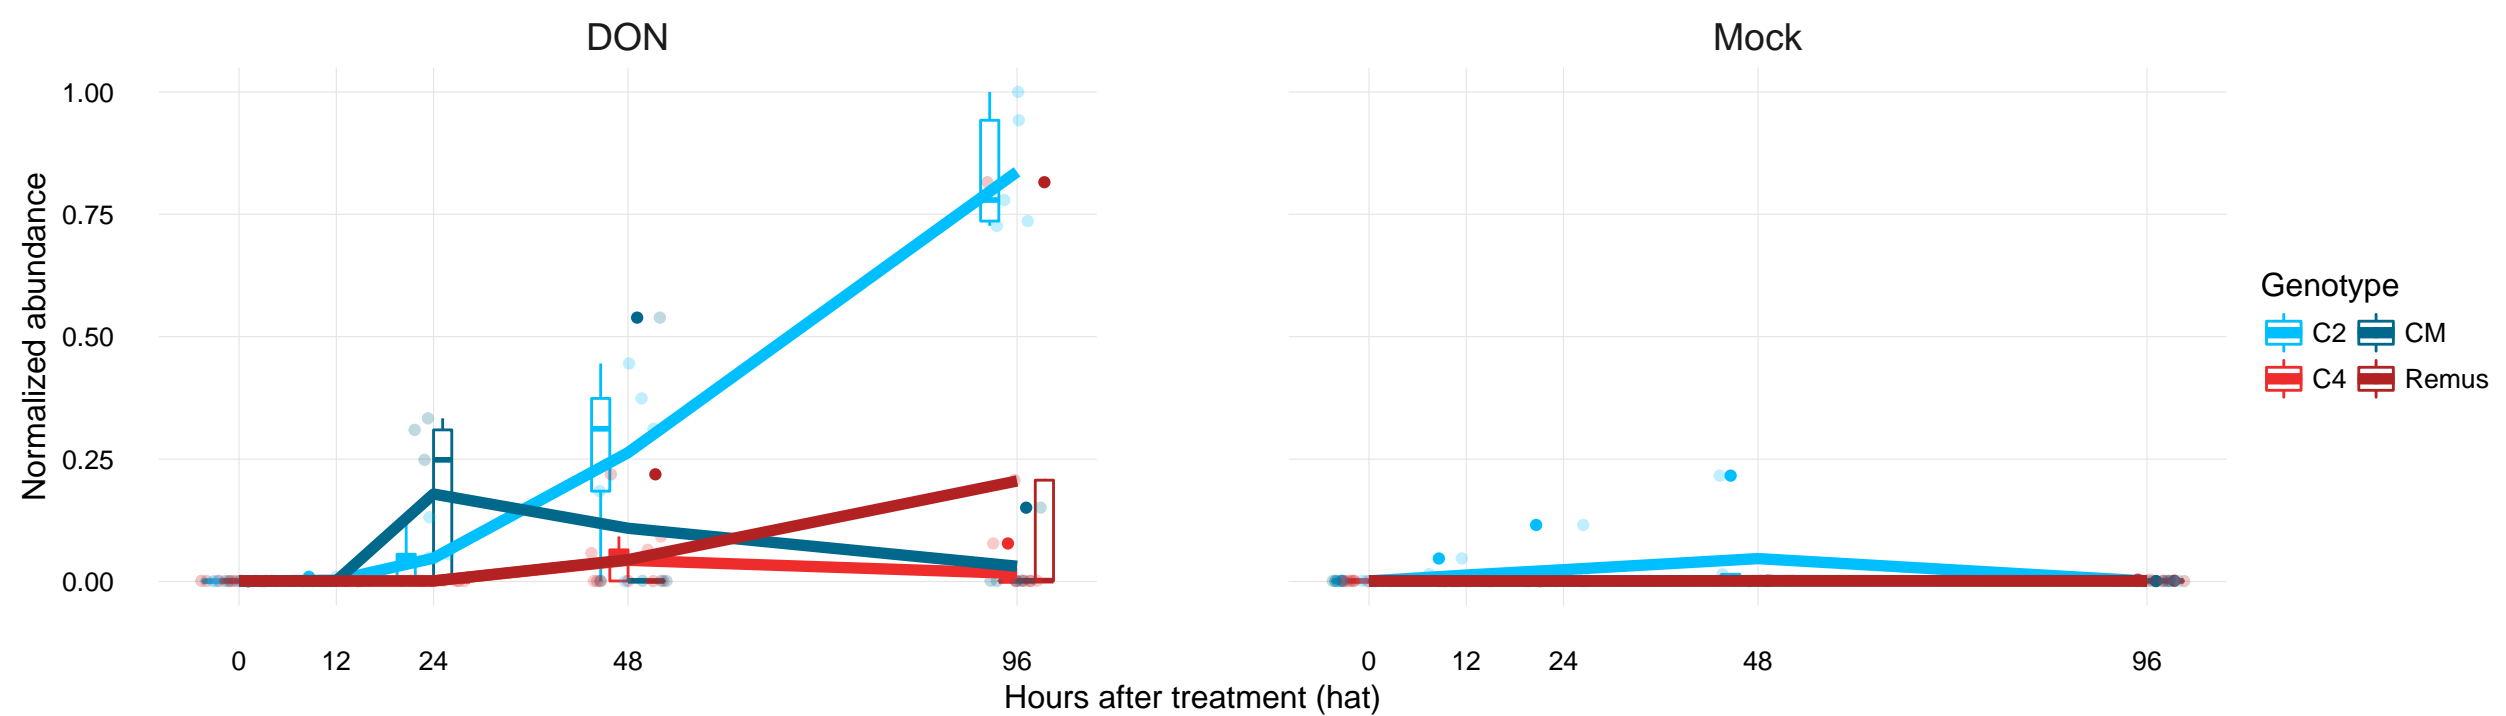

# A.115

Annotated as HCAA (diHCAA)  
(1 database hit)

|                |                                                |
|----------------|------------------------------------------------|
| MZ             | 381.181                                        |
| RT             | 18.3 min                                       |
| Normalization  | Indirectly via surrogate<br>in the KPX samples |
| Cluster        | Cluster 1A                                     |
| Cn total / Phe | 22 /                                           |

## C2, C4; different treatments

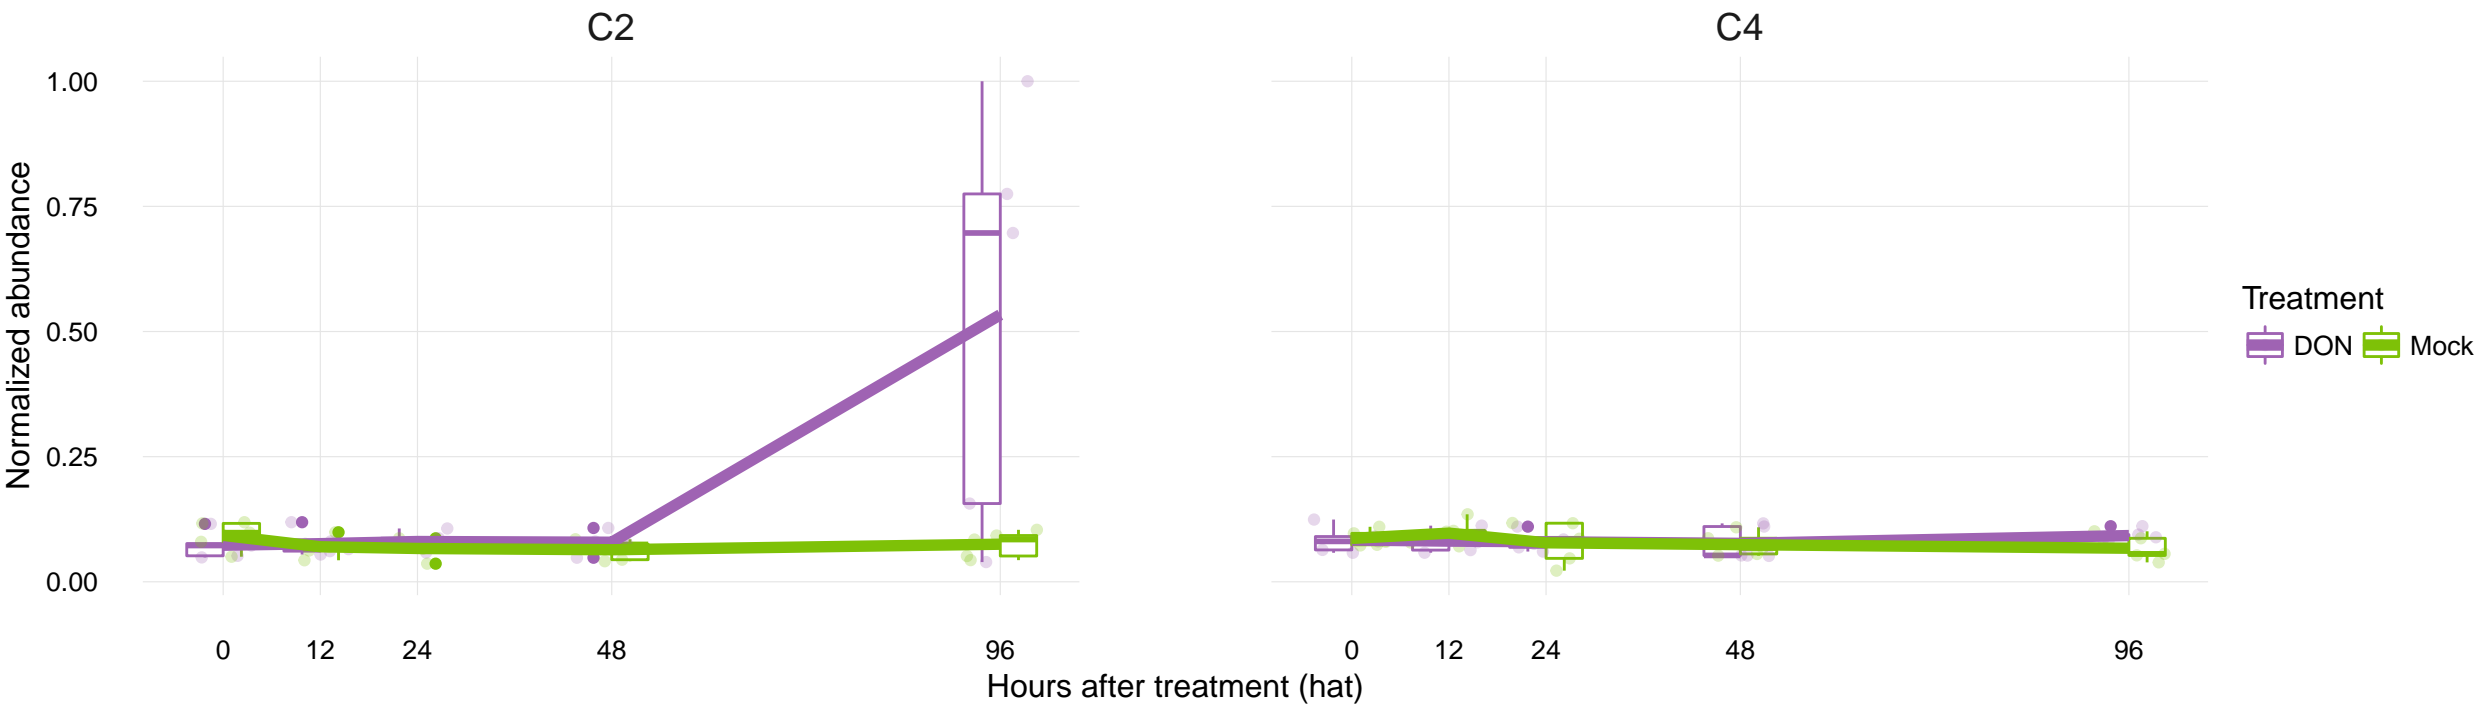

## DON, Mock; different genotypes

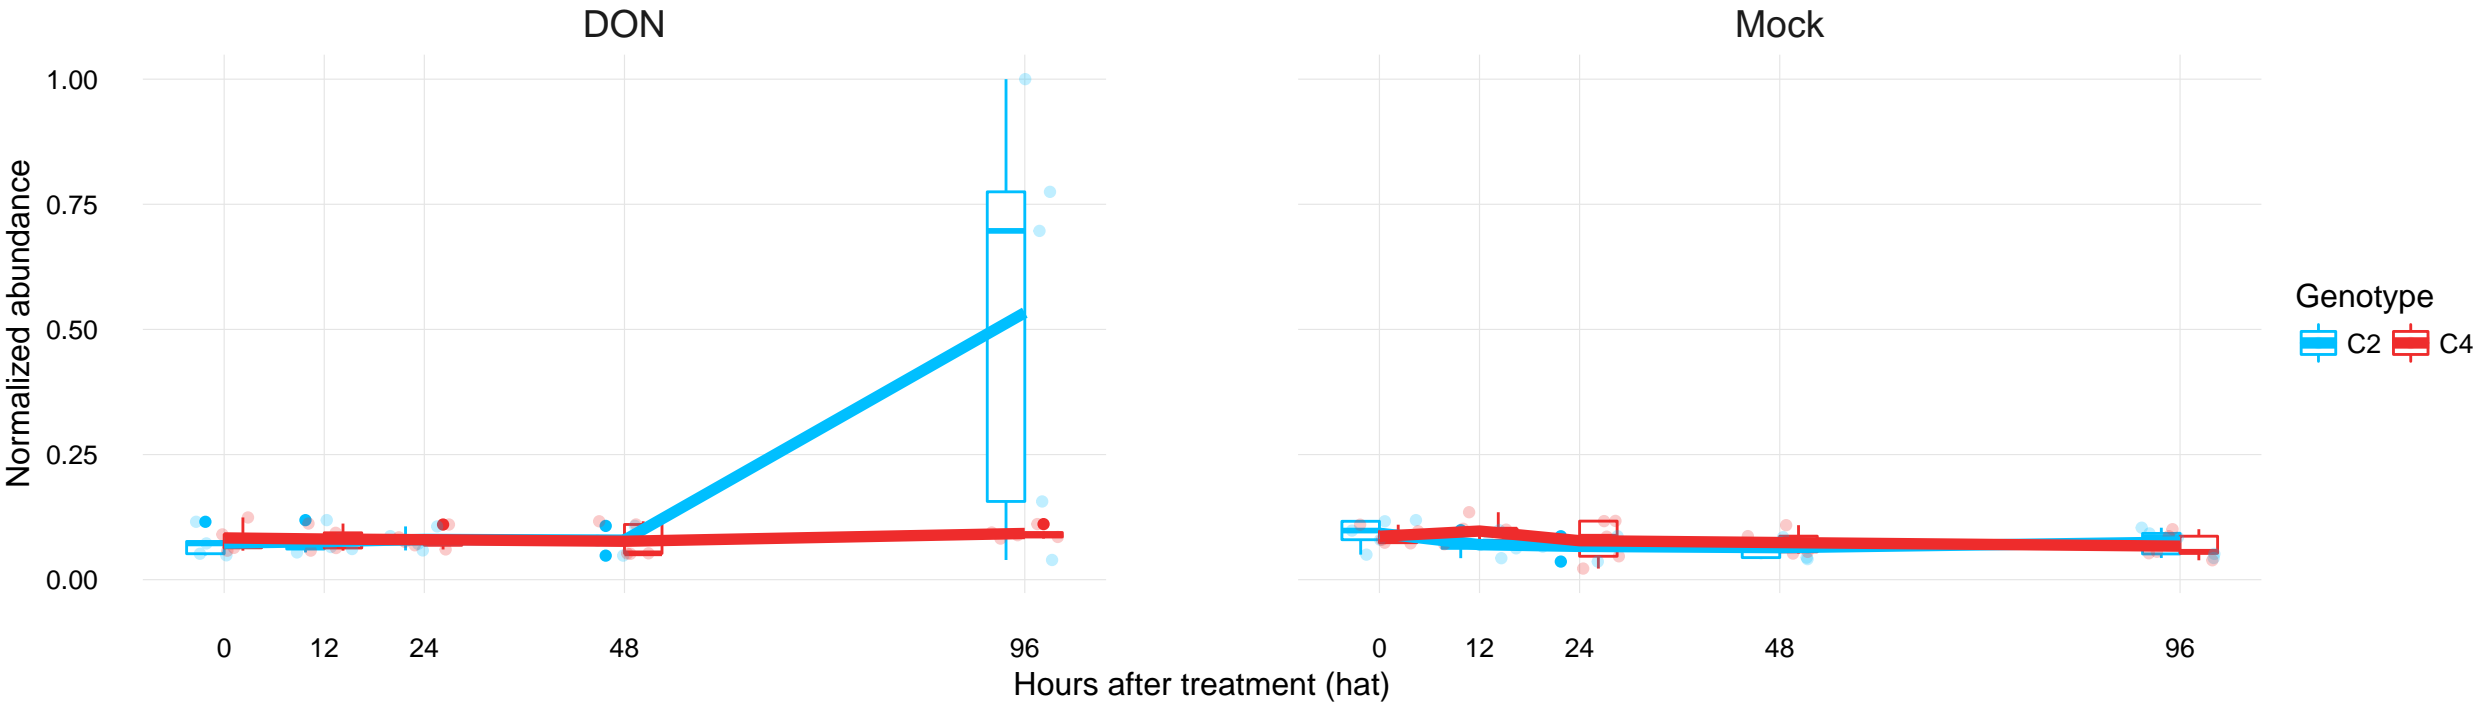

## CM, Remus; different treatments

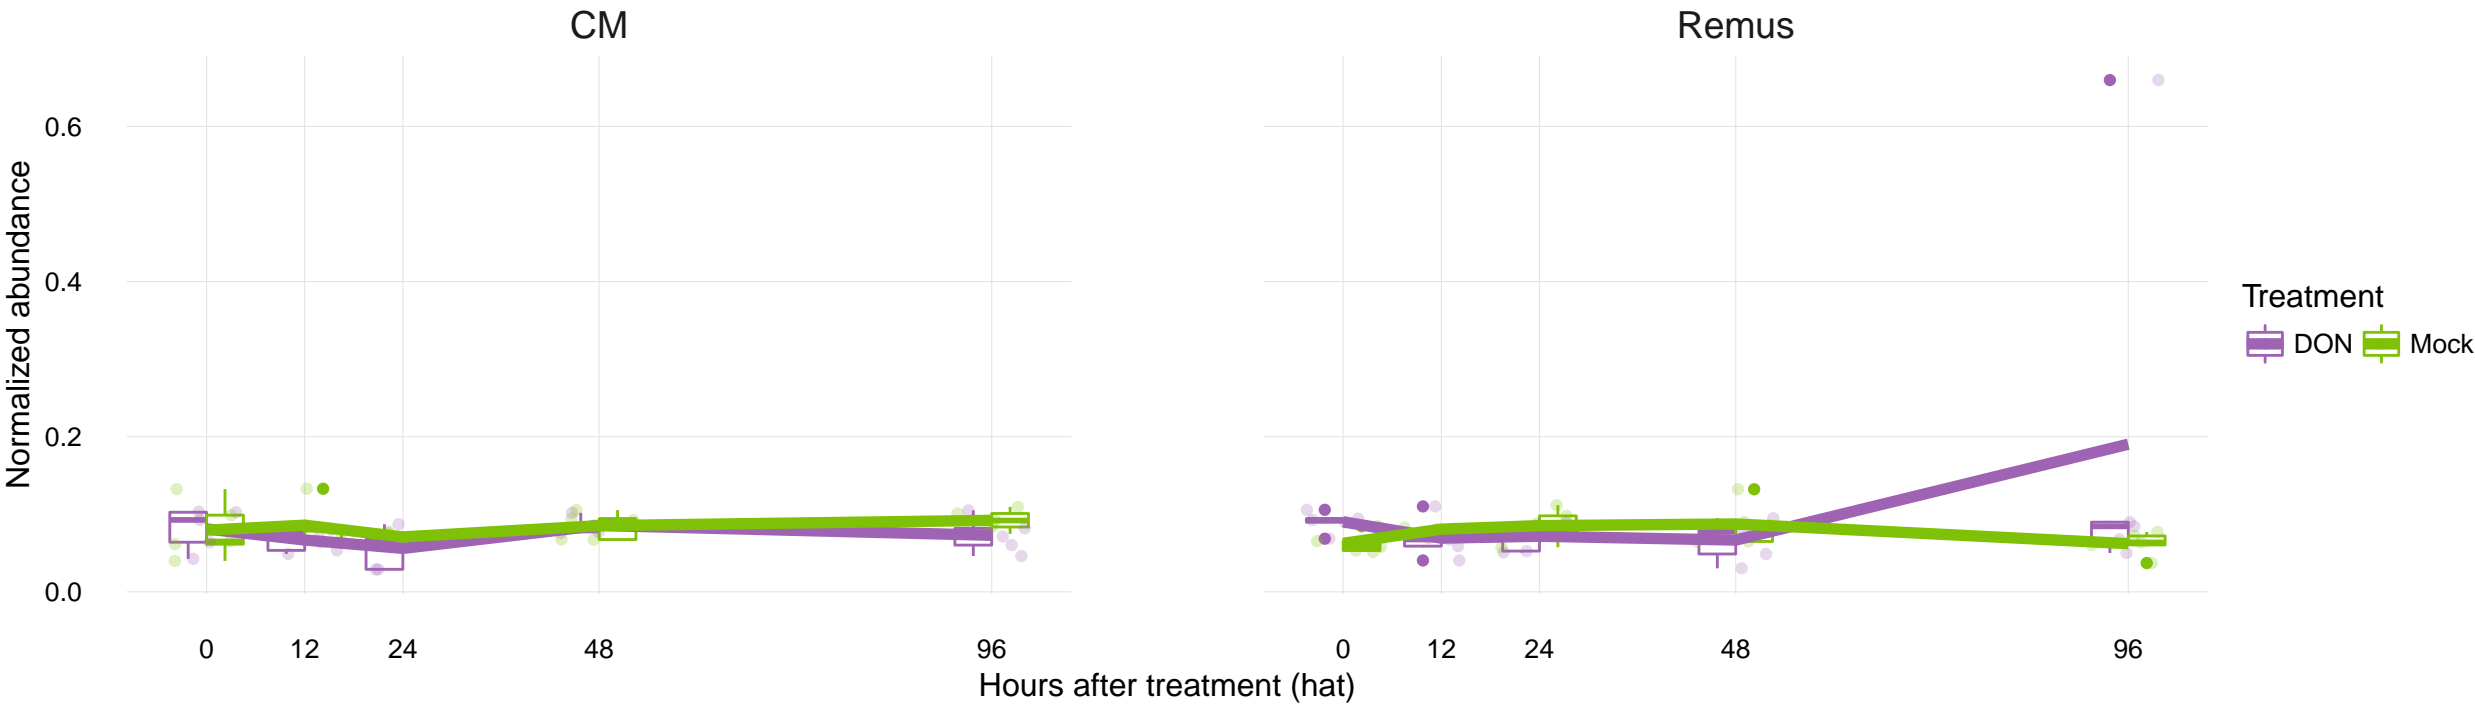

## DON, Mock; all four genotypes

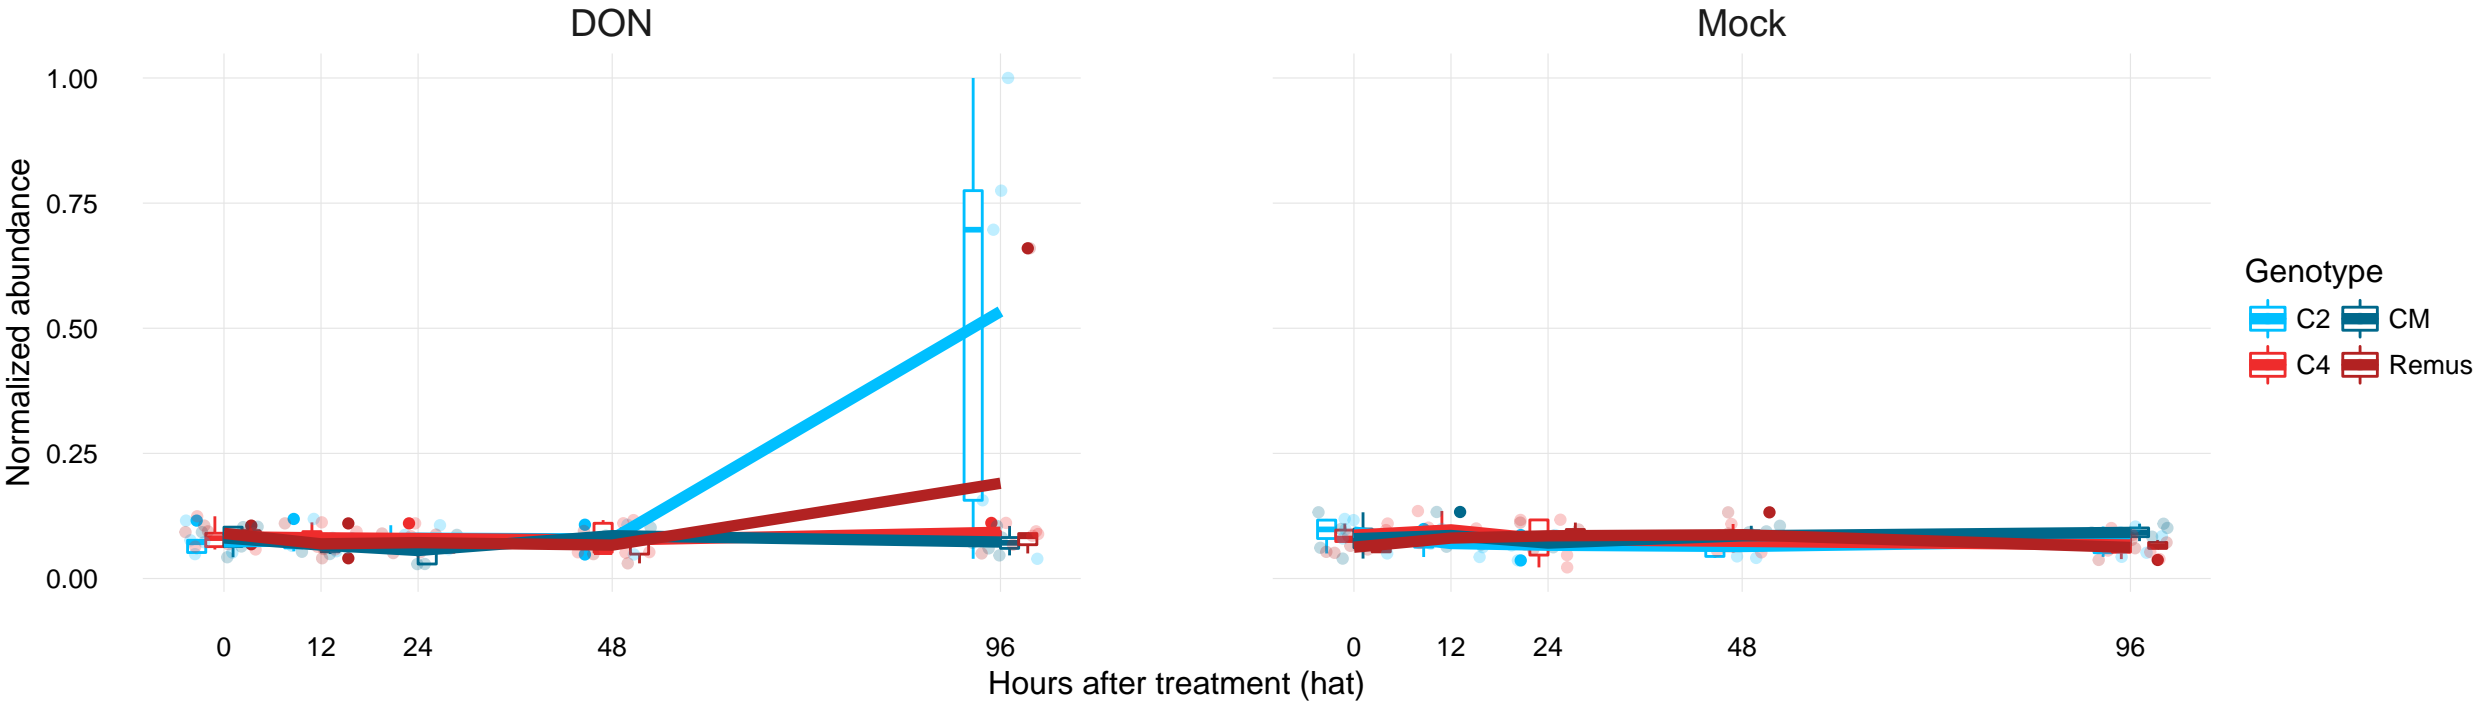



# A.25

Annotated as others (dipeptide)  
(1 database hit)

|                |                                                |
|----------------|------------------------------------------------|
| MZ             | 281.1139                                       |
| RT             | 8.84 min                                       |
| Normalization  | Indirectly via surrogate<br>in the KPX samples |
| Cluster        | Cluster 1A                                     |
| Cn total / Phe | 9 / 9                                          |

## C2, C4; different treatments

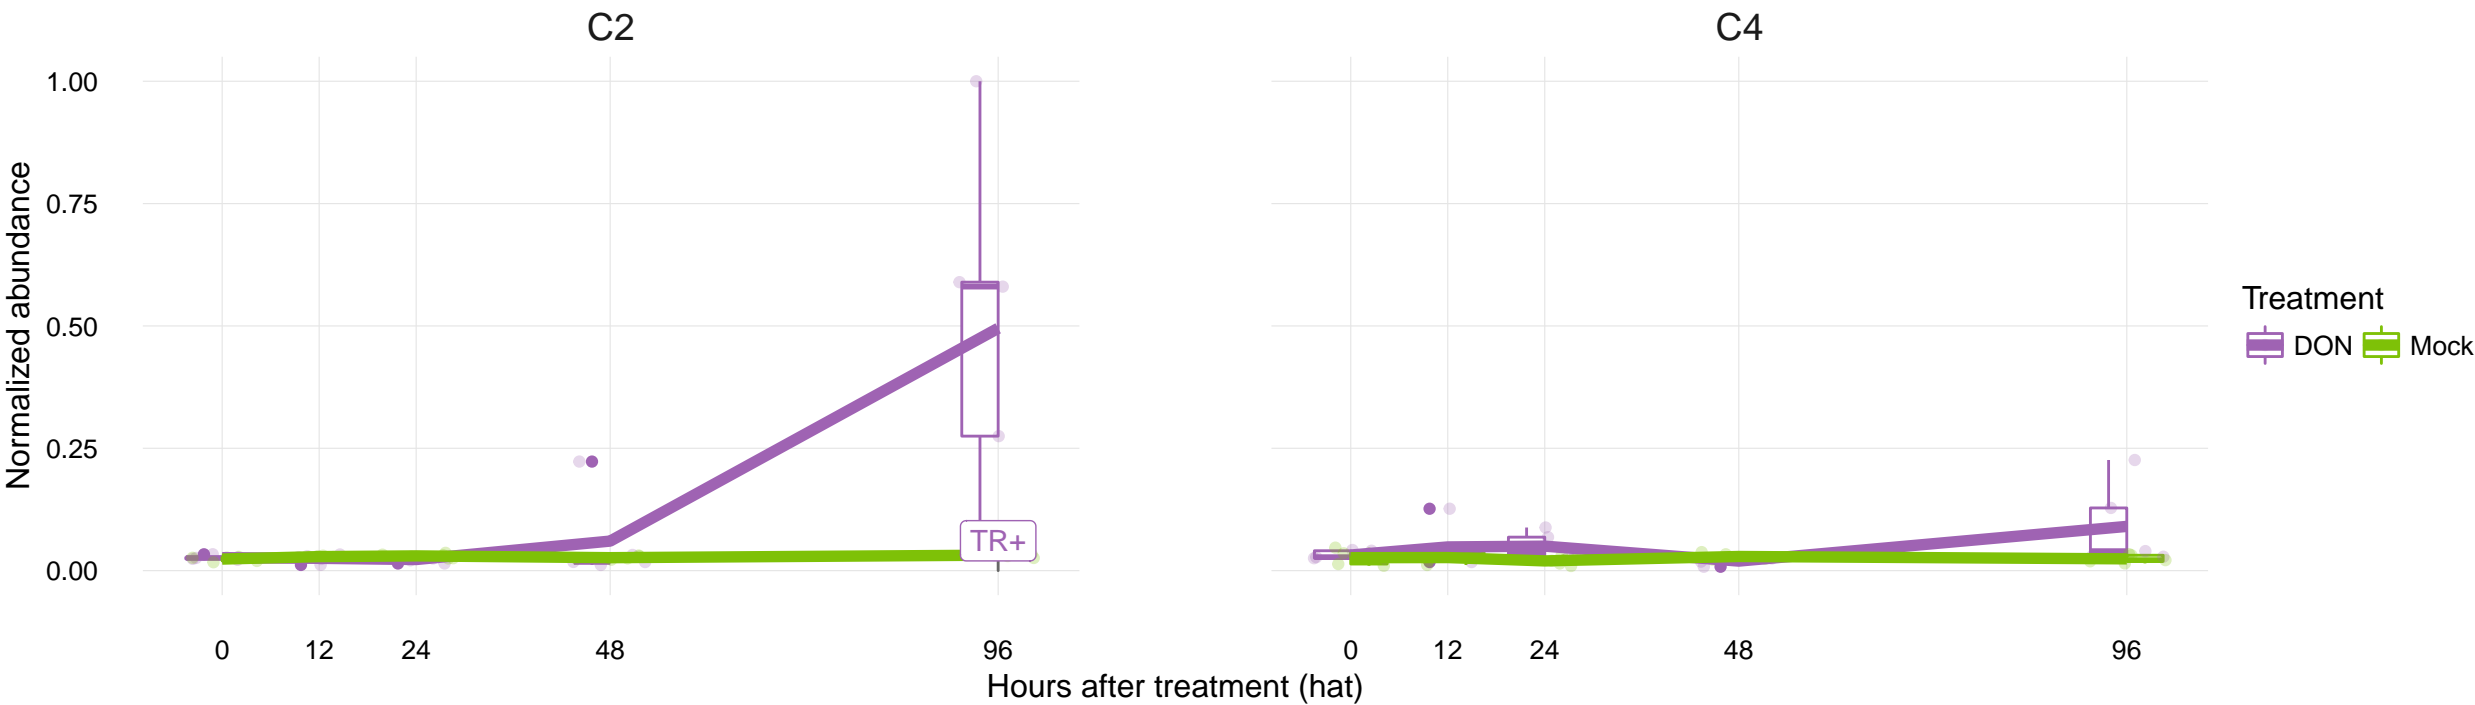

## DON, Mock; different genotypes

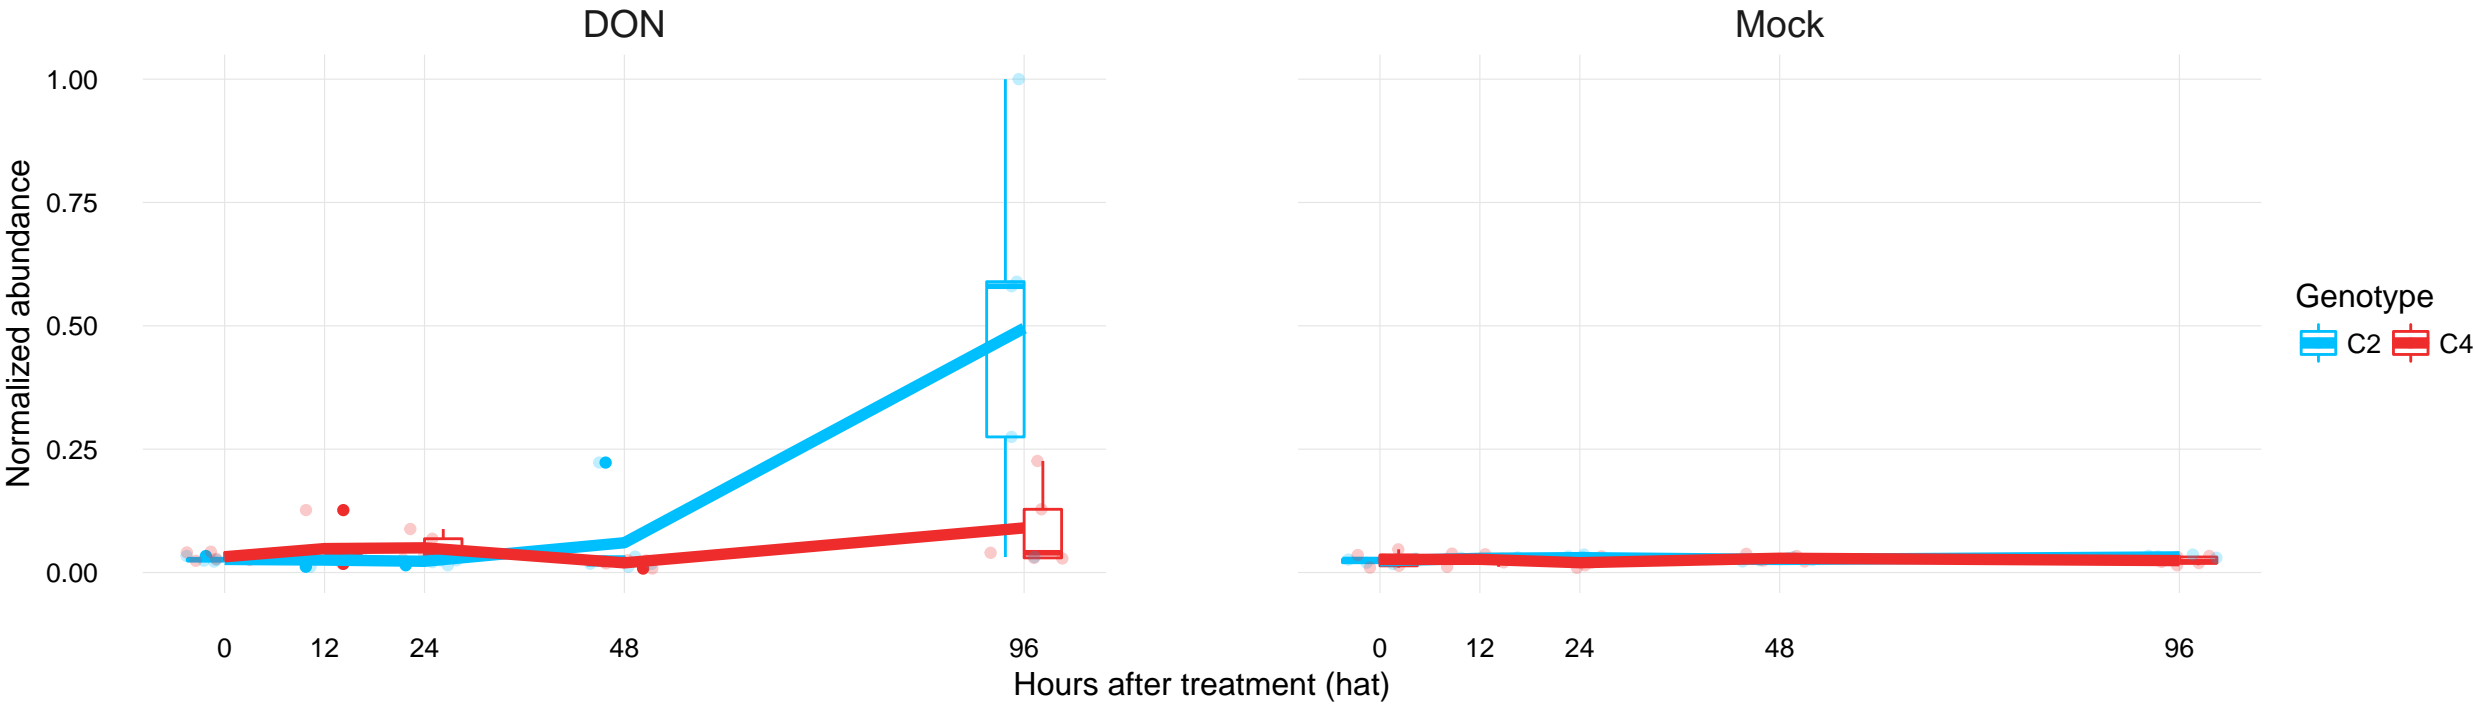

## CM, Remus; different treatments

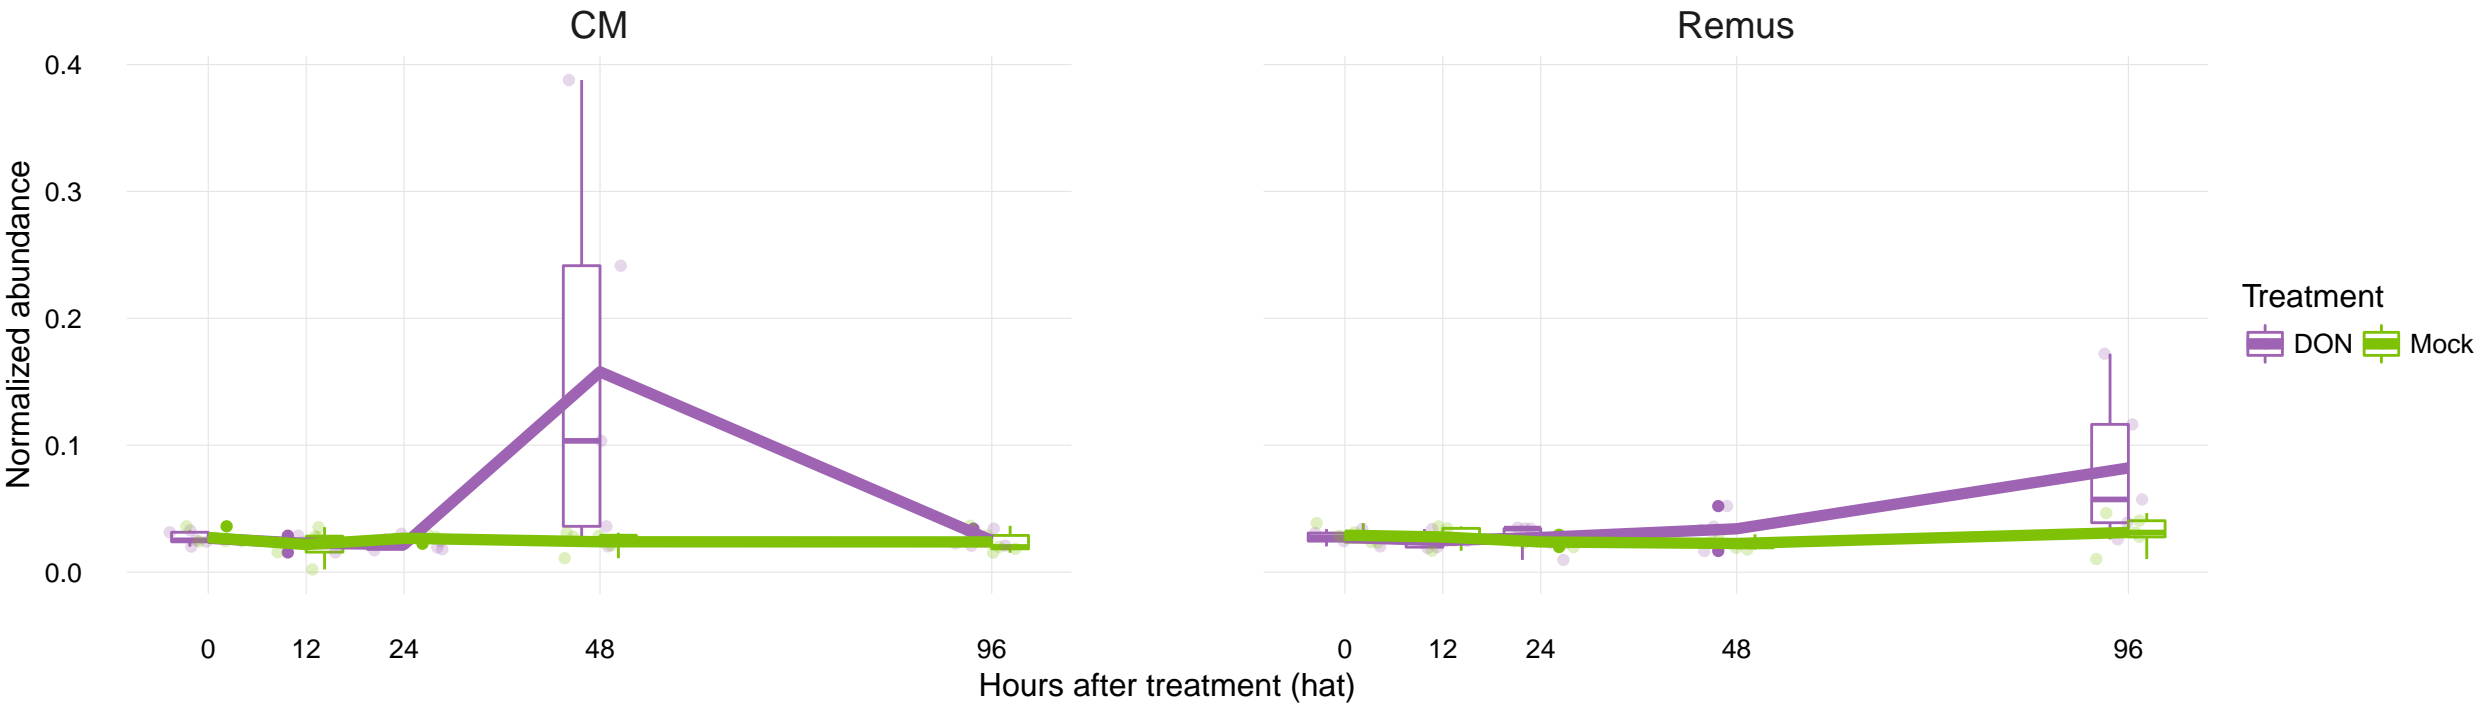

## DON, Mock; all four genotypes

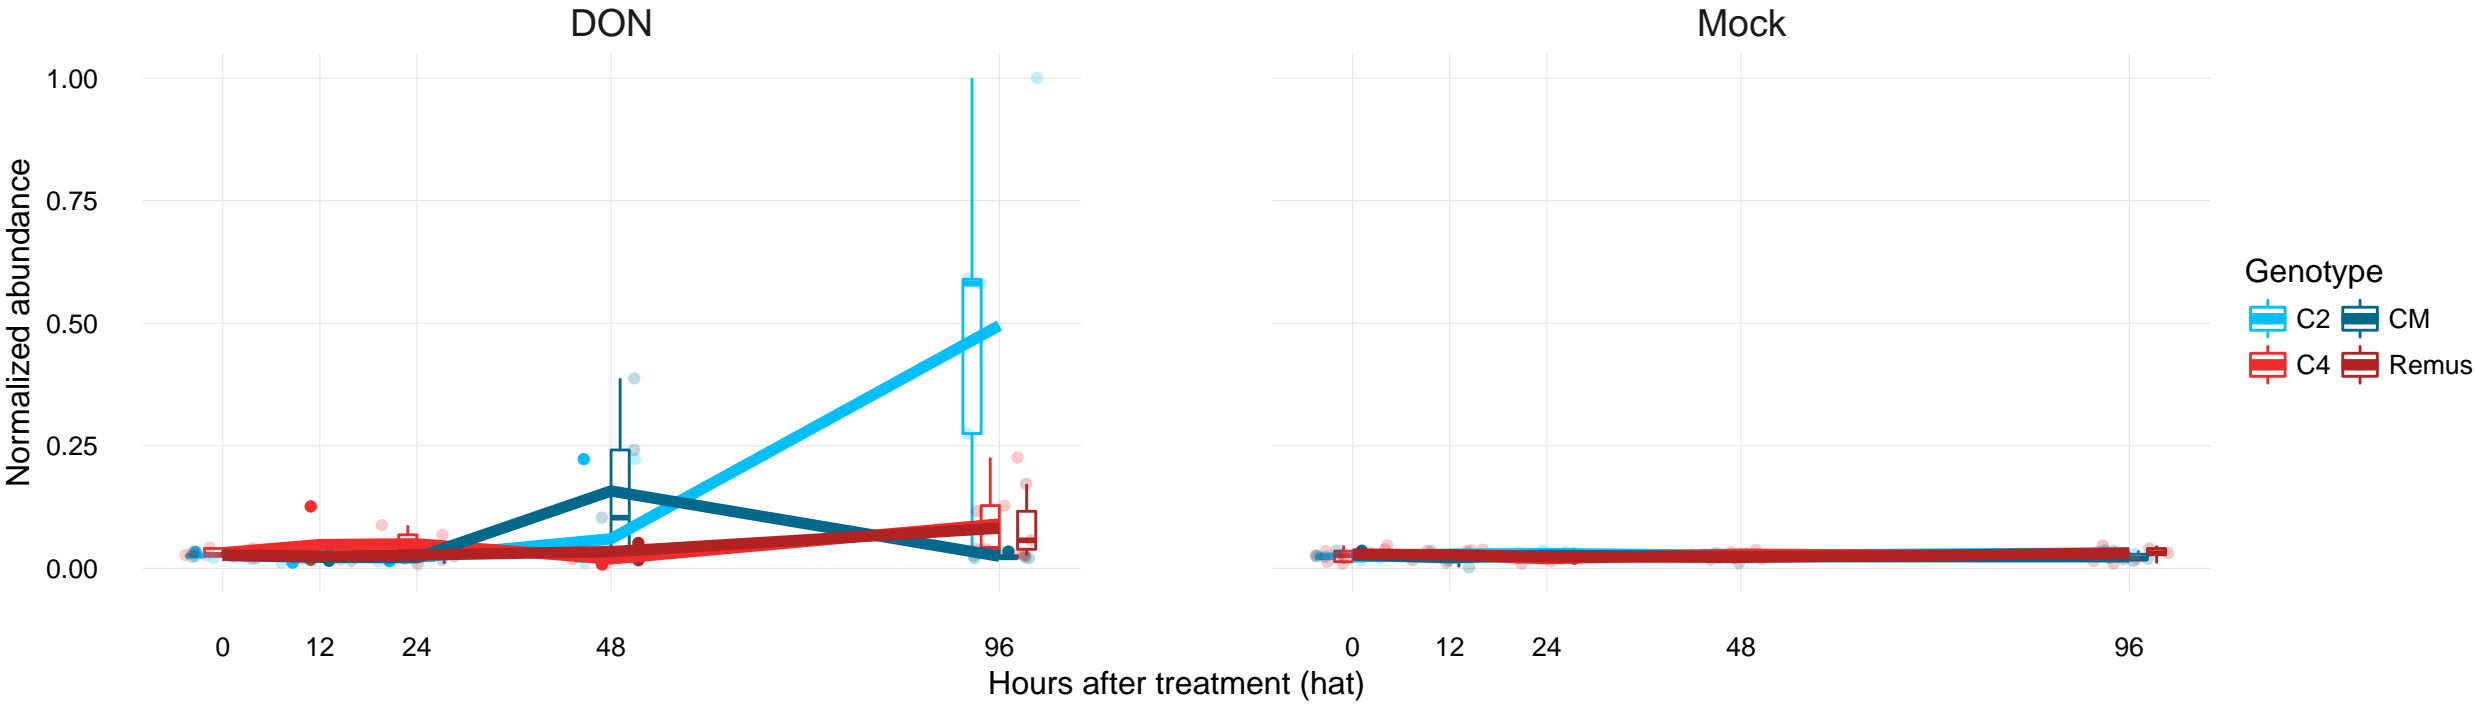

# U.13

Unknown Phe-derived wheat-metabolite

|                |                          |
|----------------|--------------------------|
| MZ             | 147.0442                 |
| RT             | 21.22 min                |
| Normalization  | Directly via KPX samples |
| Cluster        | –                        |
| Cn total / Phe | 9 / 9                    |

## C2, C4; different treatments

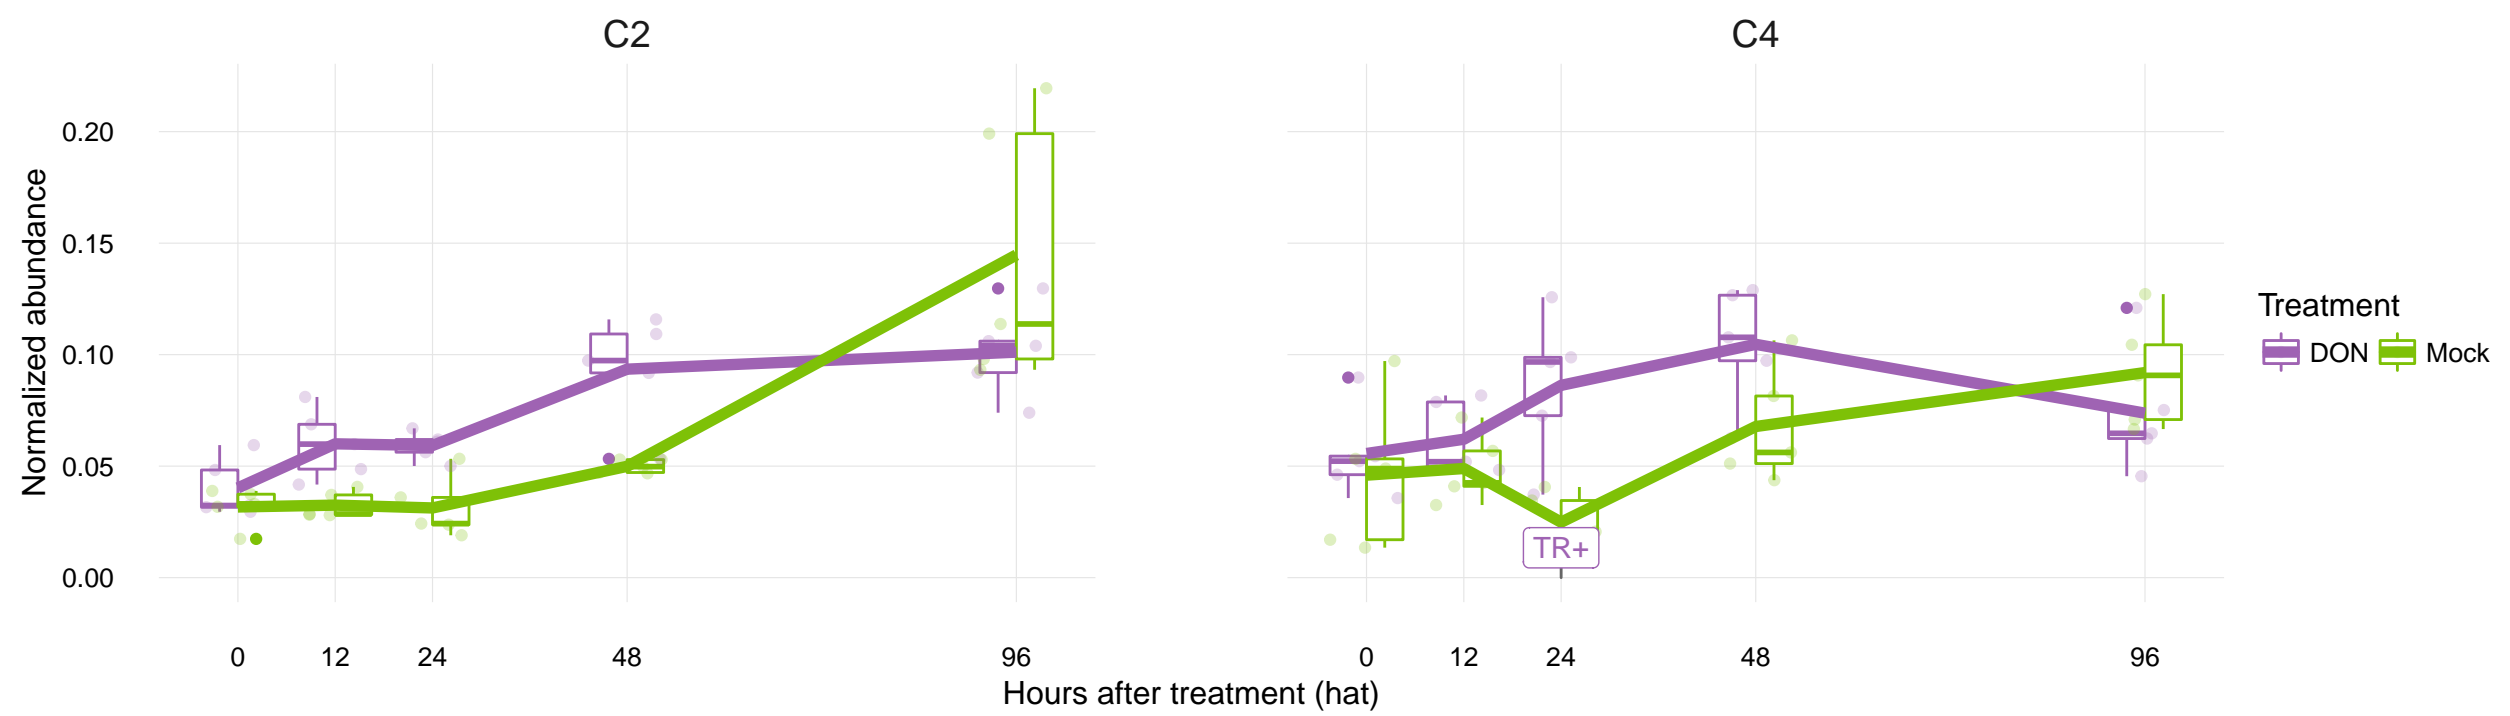

## DON, Mock; different genotypes

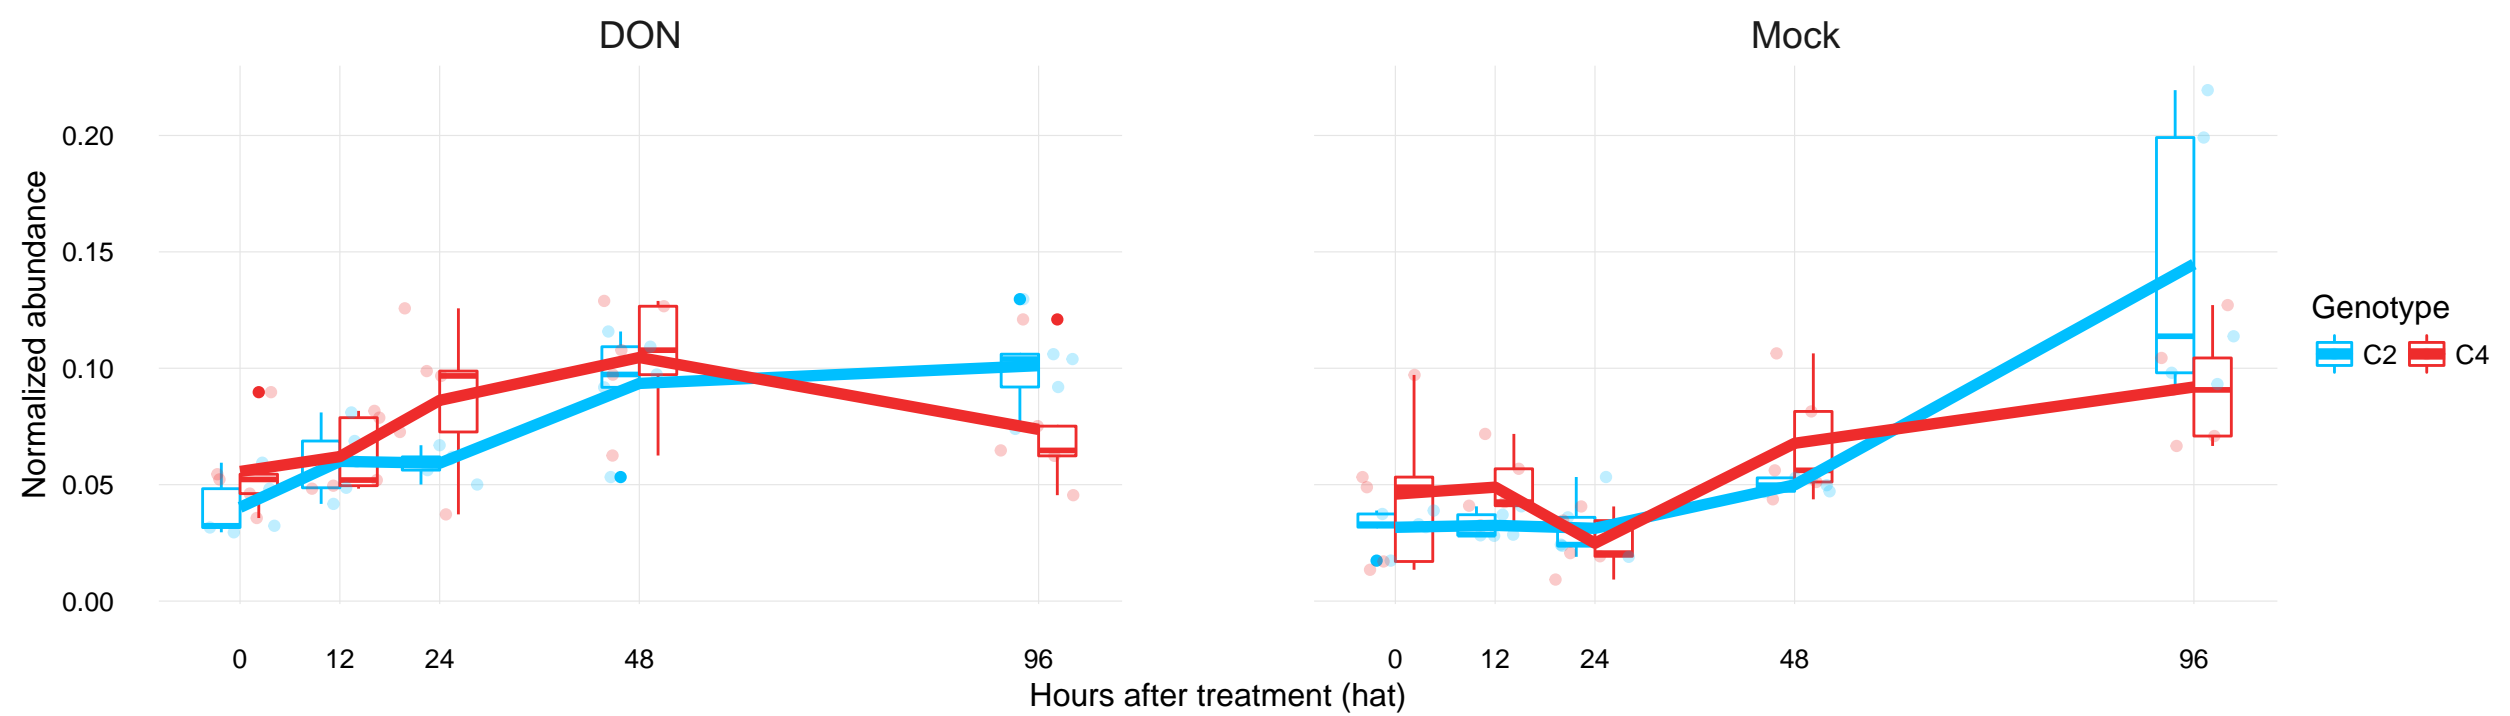

## CM, Remus; different treatments

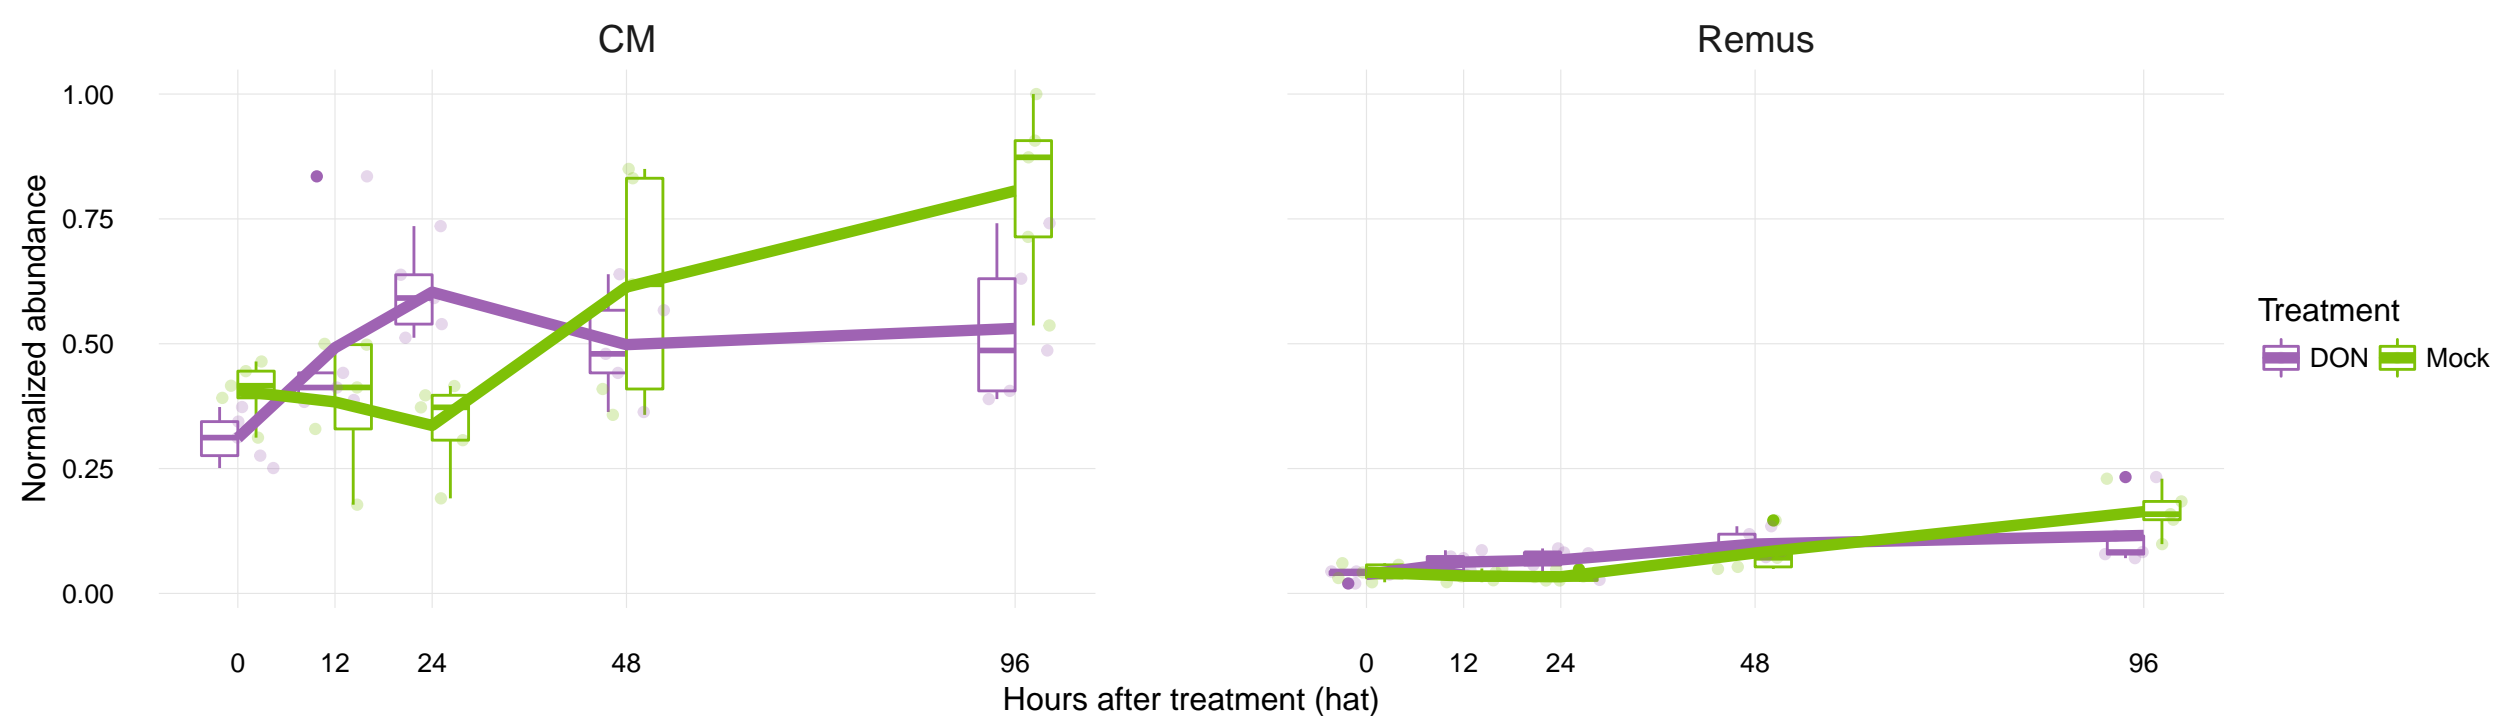

## DON, Mock; all four genotypes

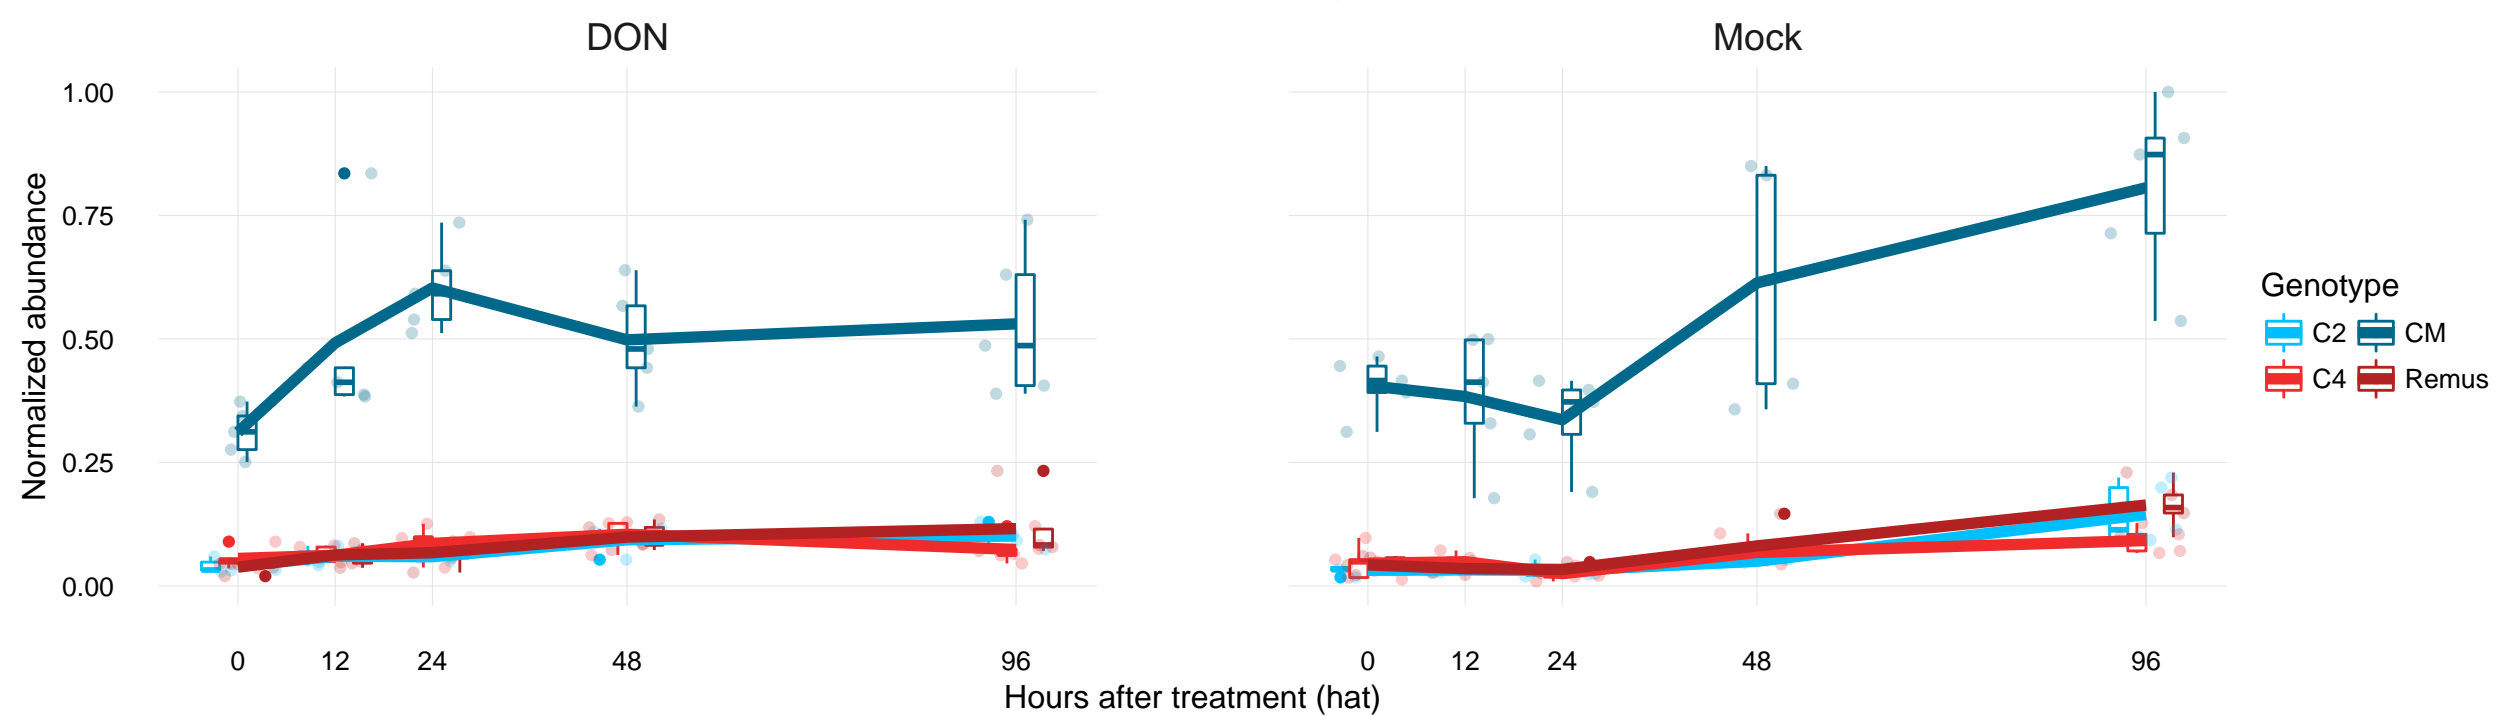

# A.125

Annotated as Lignan or Flavonoid  
(3 database hits)

|                |                          |
|----------------|--------------------------|
| MZ             | 417.1545                 |
| RT             | 20.35 min                |
| Normalization  | Directly via KPX samples |
| Cluster        | –                        |
| Cn total / Phe | 22 /                     |

## C2, C4; different treatments

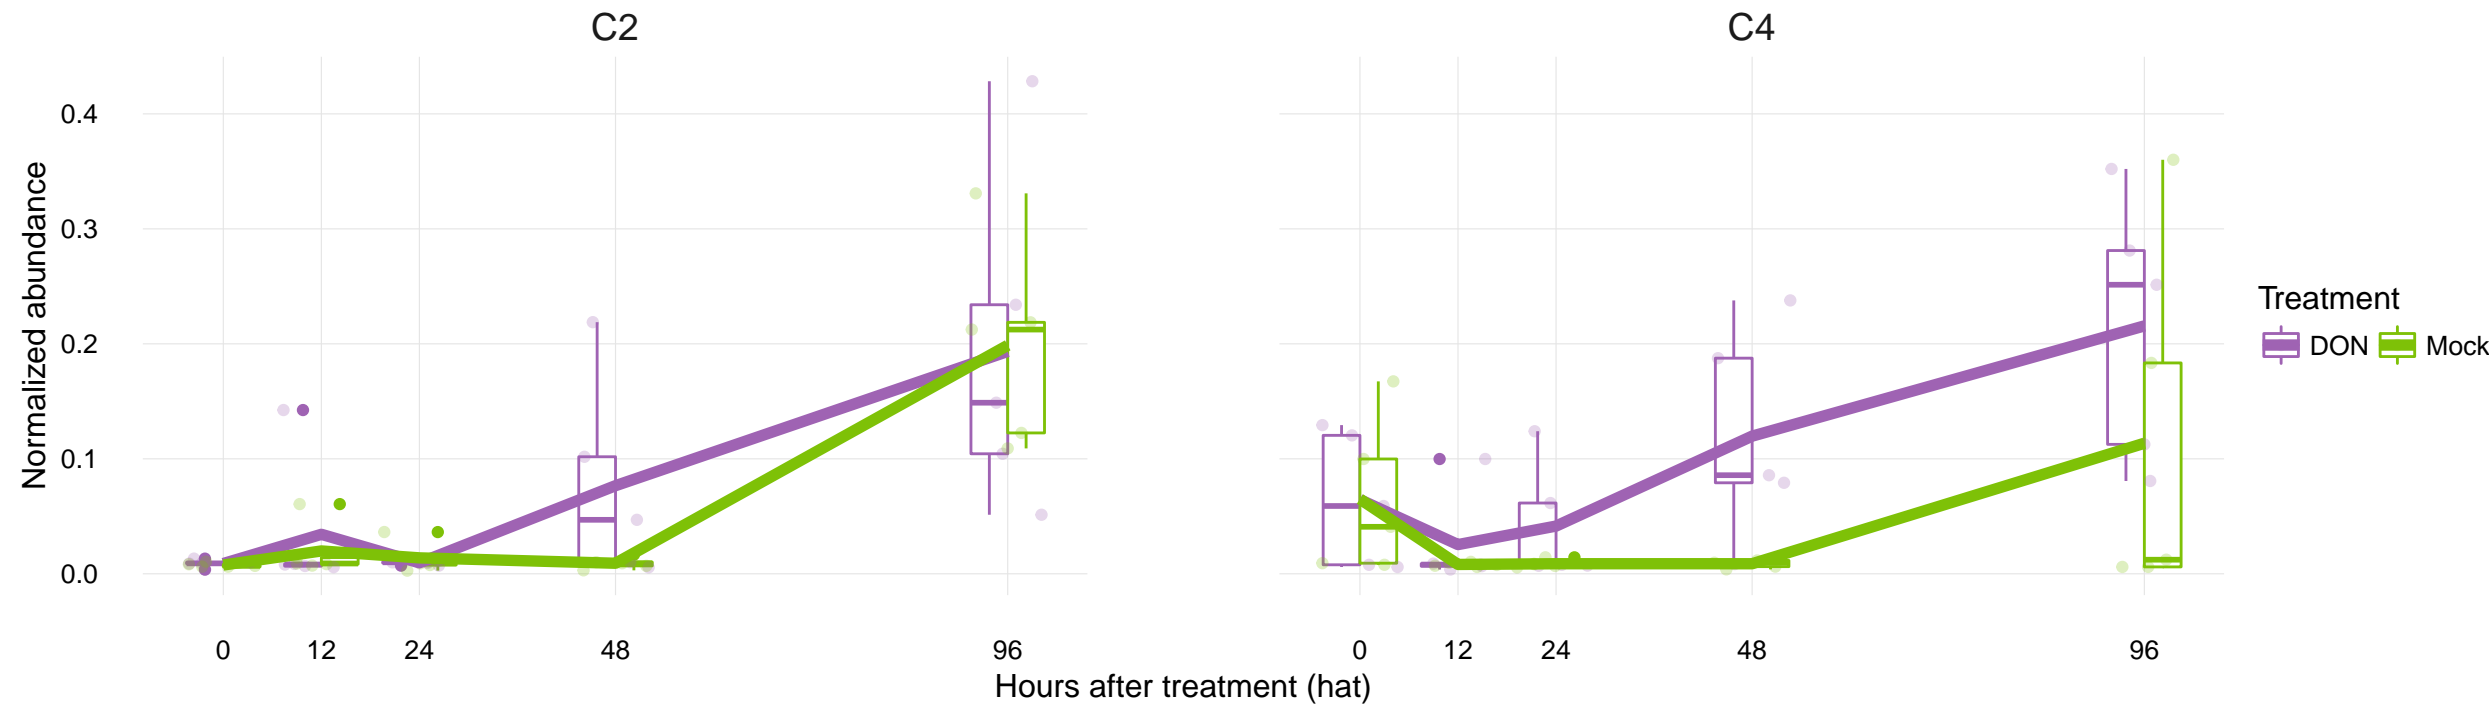

## DON, Mock; different genotypes

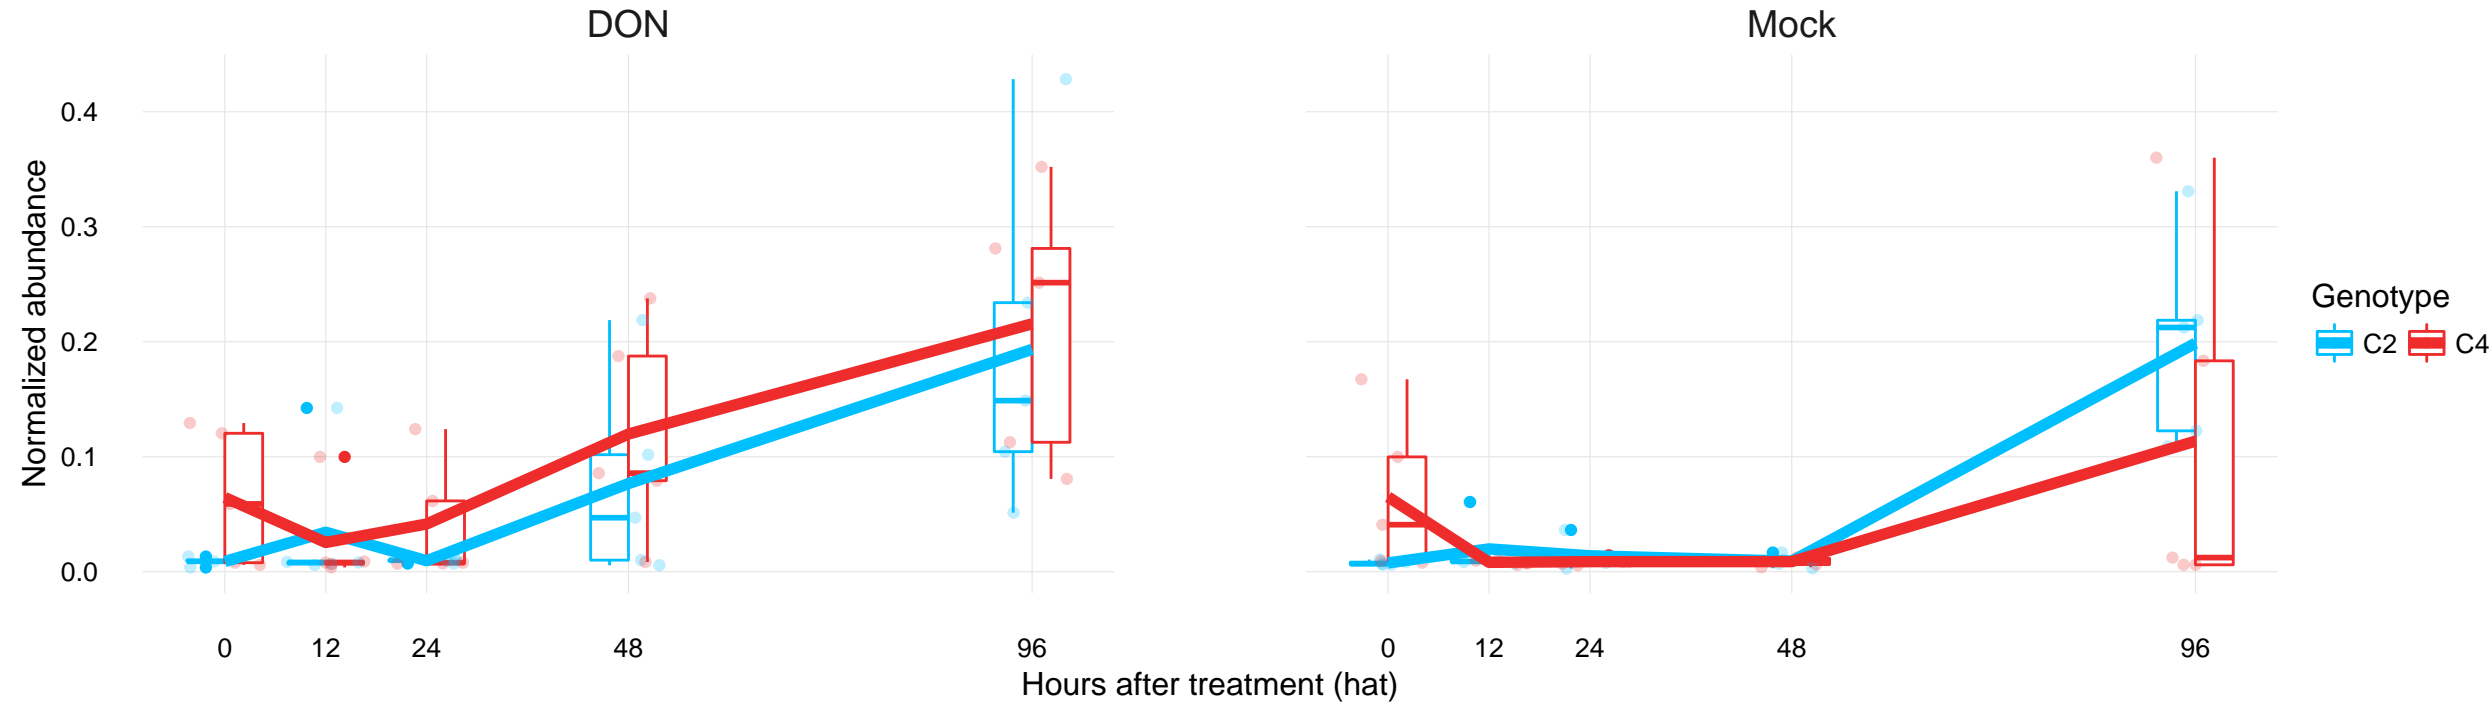

## CM, Remus; different treatments

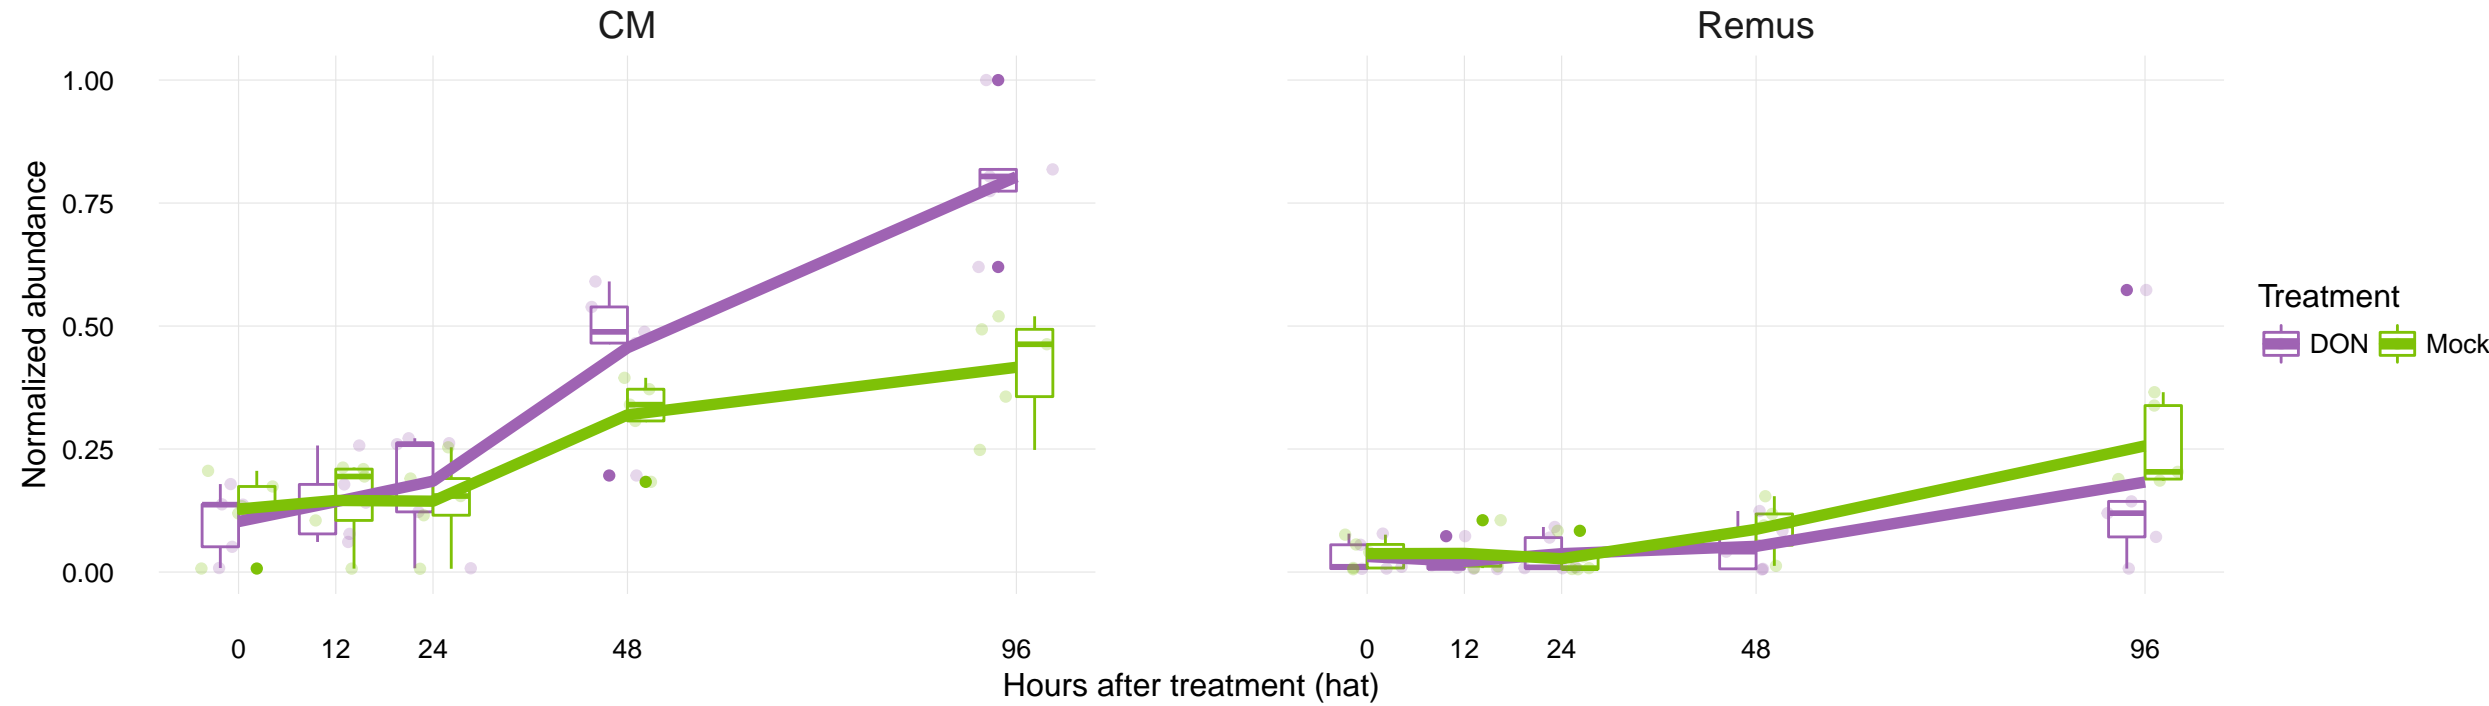

## DON, Mock; all four genotypes

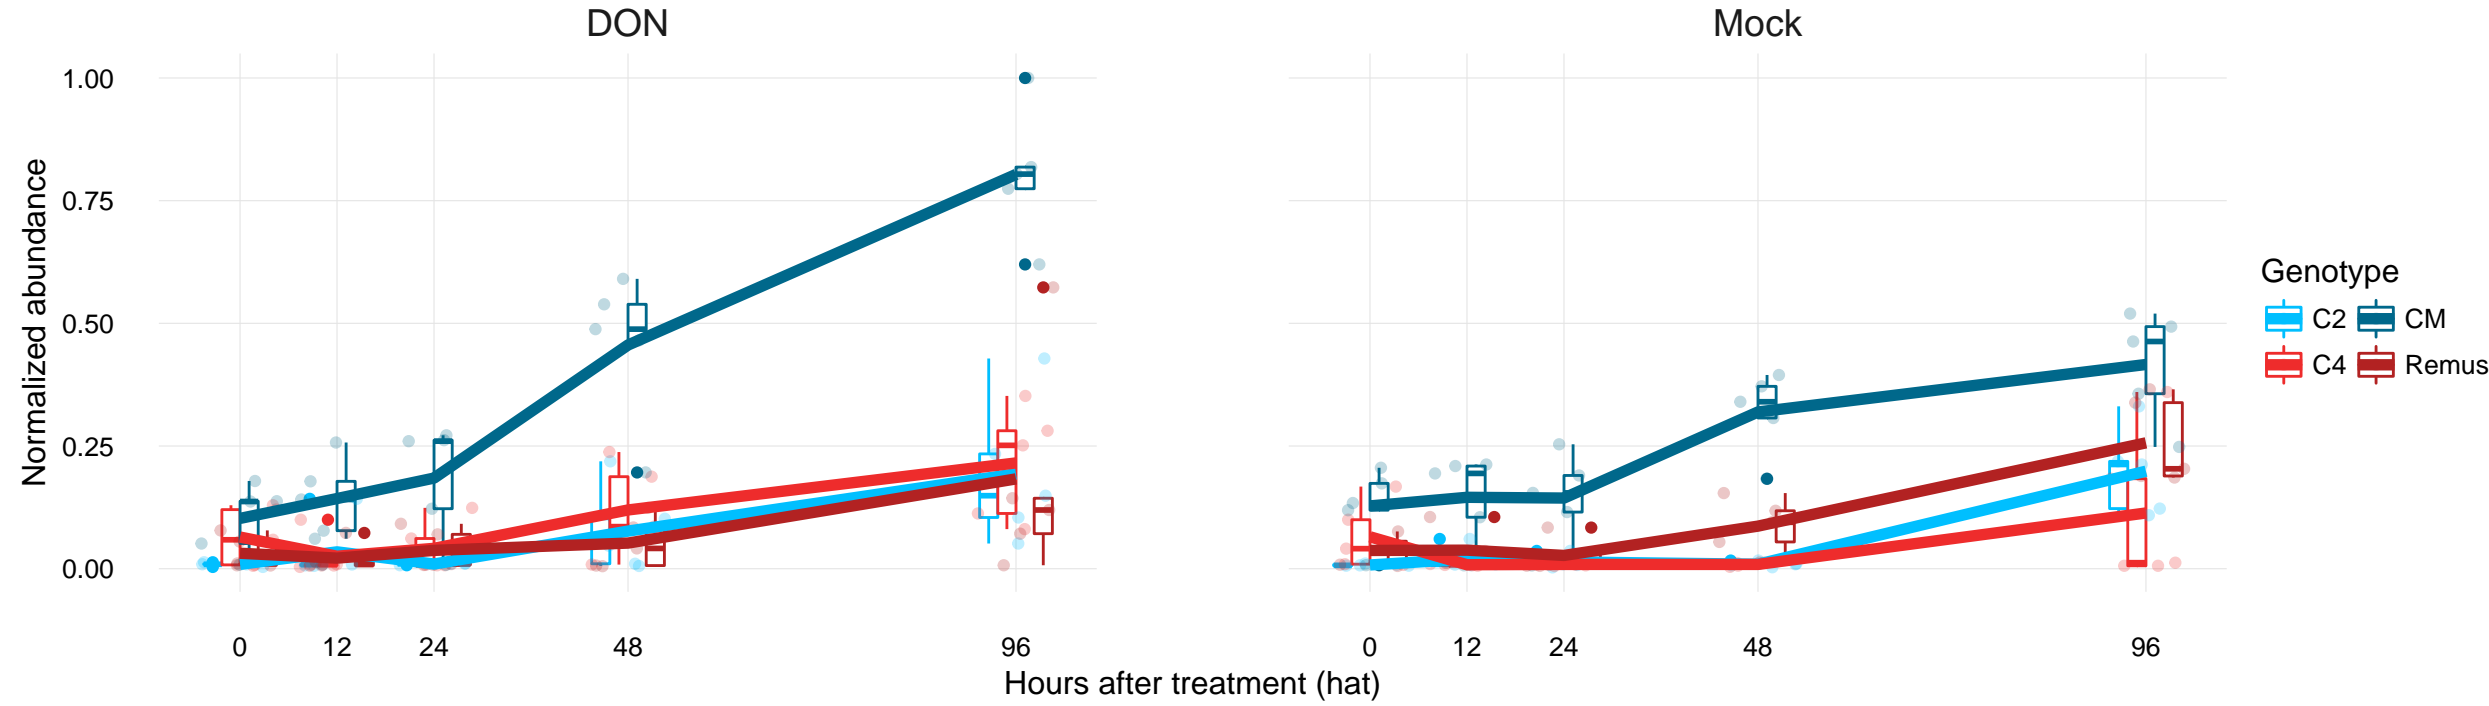

A.88

Annotated as HCA derivative  
(1 database hit)

|                |                          |
|----------------|--------------------------|
| MZ             | 393.1157                 |
| RT             | 15.31 min                |
| Normalization  | Directly via KPX samples |
| Cluster        | –                        |
| Cn total / Phe | 17 /                     |

C2, C4; different treatments

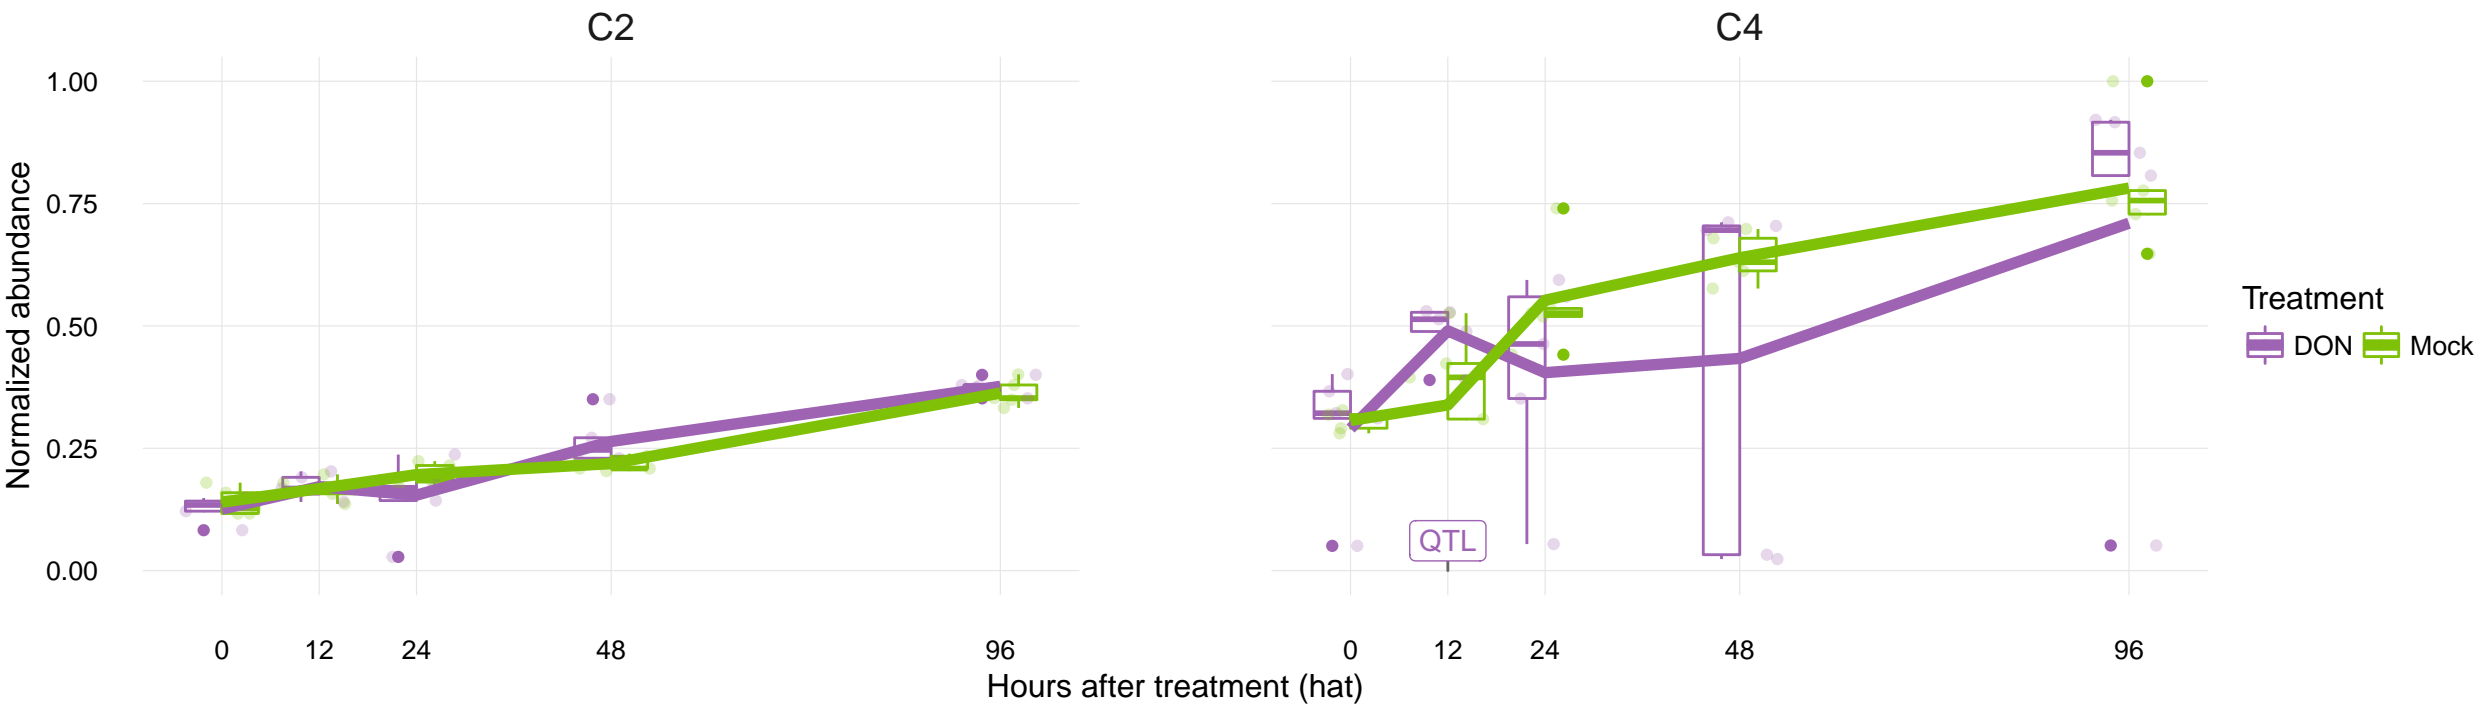

DON, Mock; different genotypes

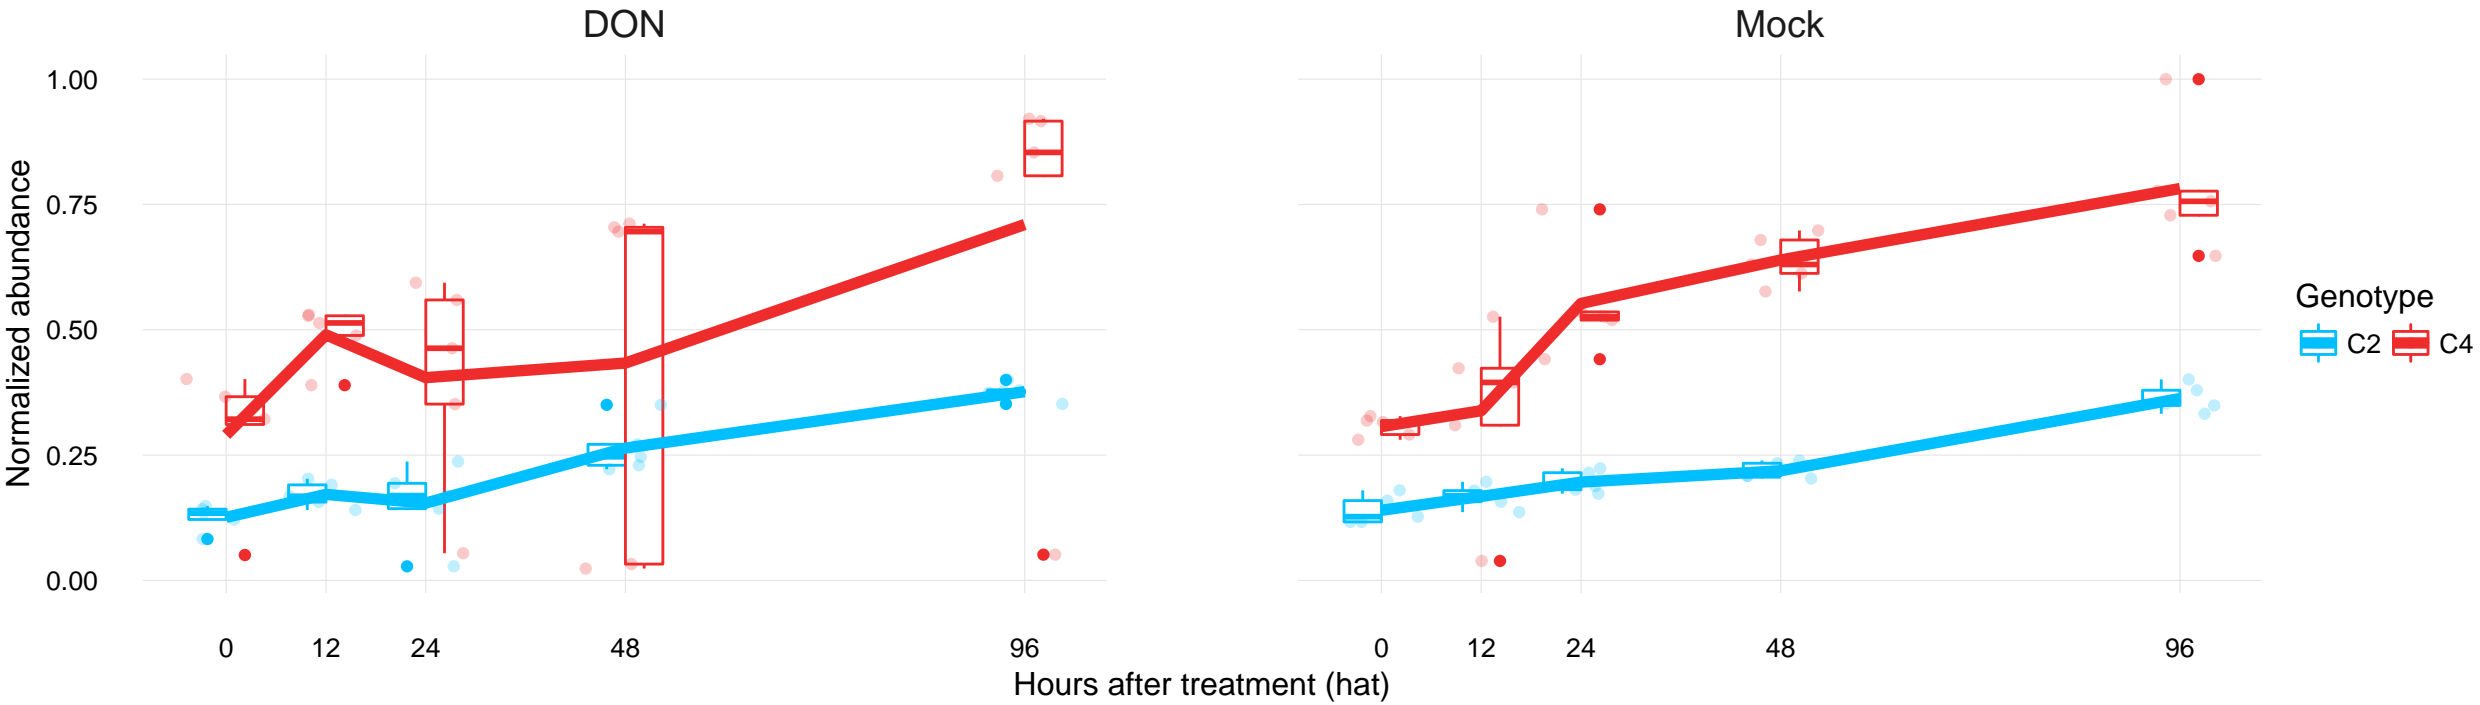

CM, Remus; different treatments

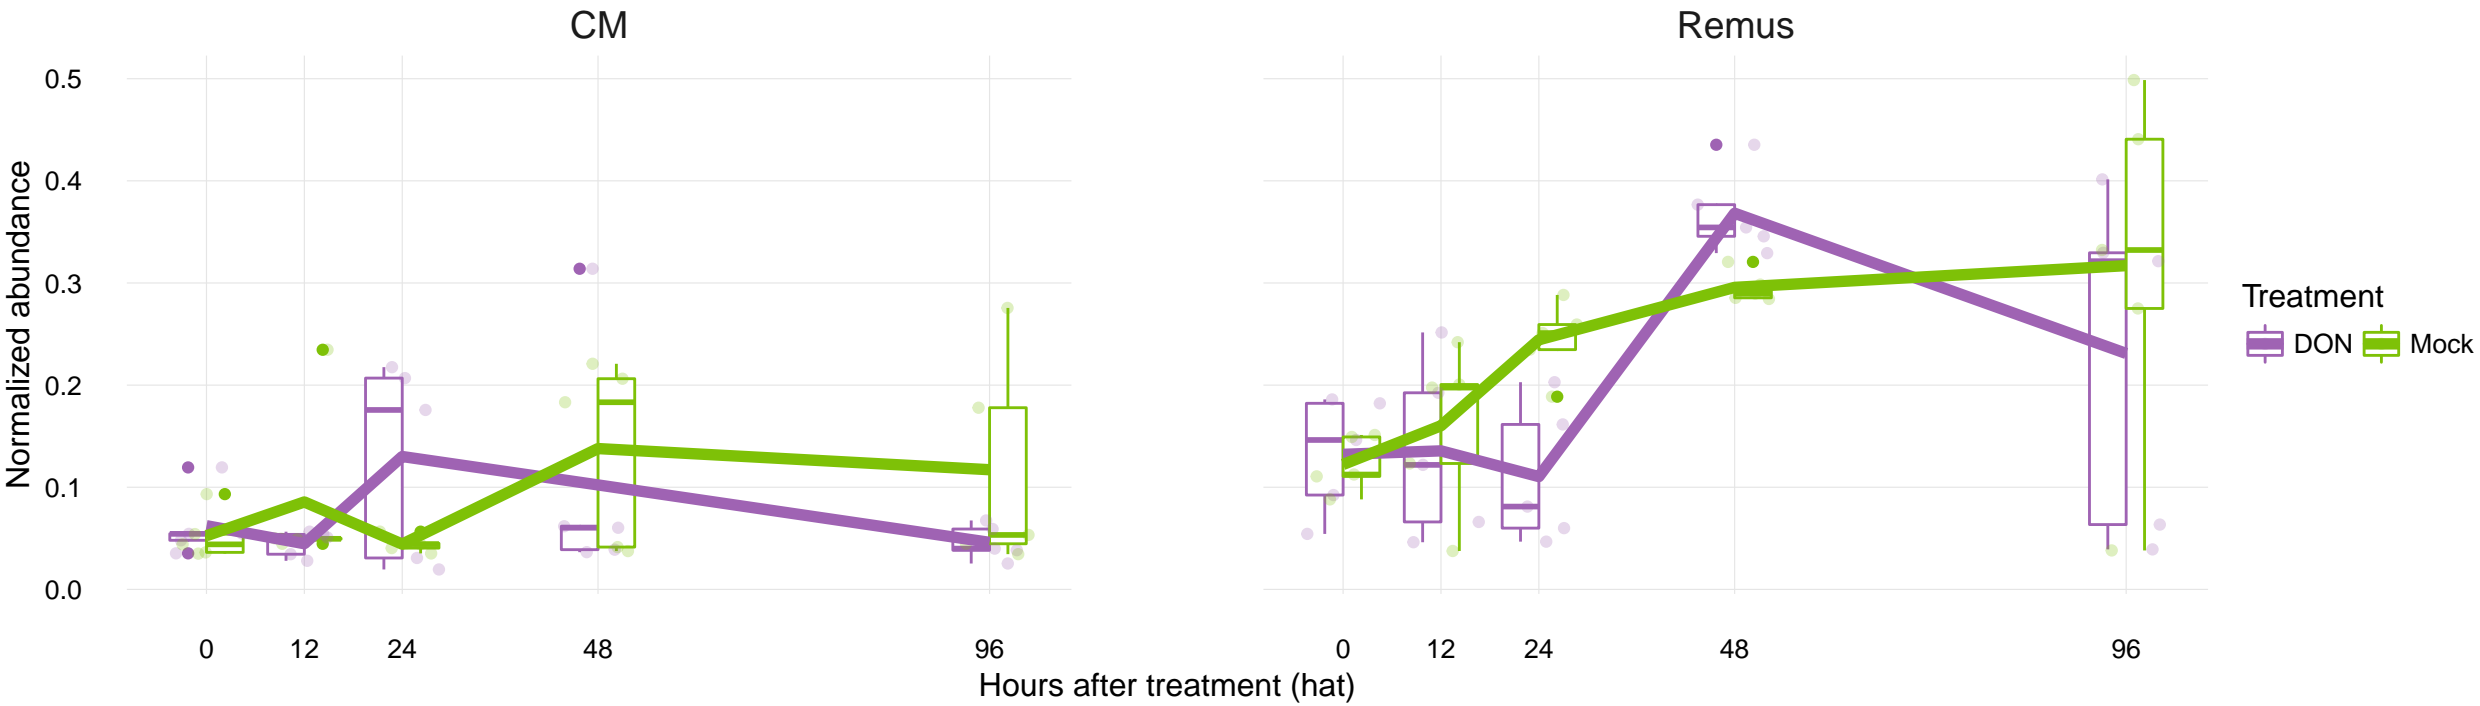

DON, Mock; all four genotypes

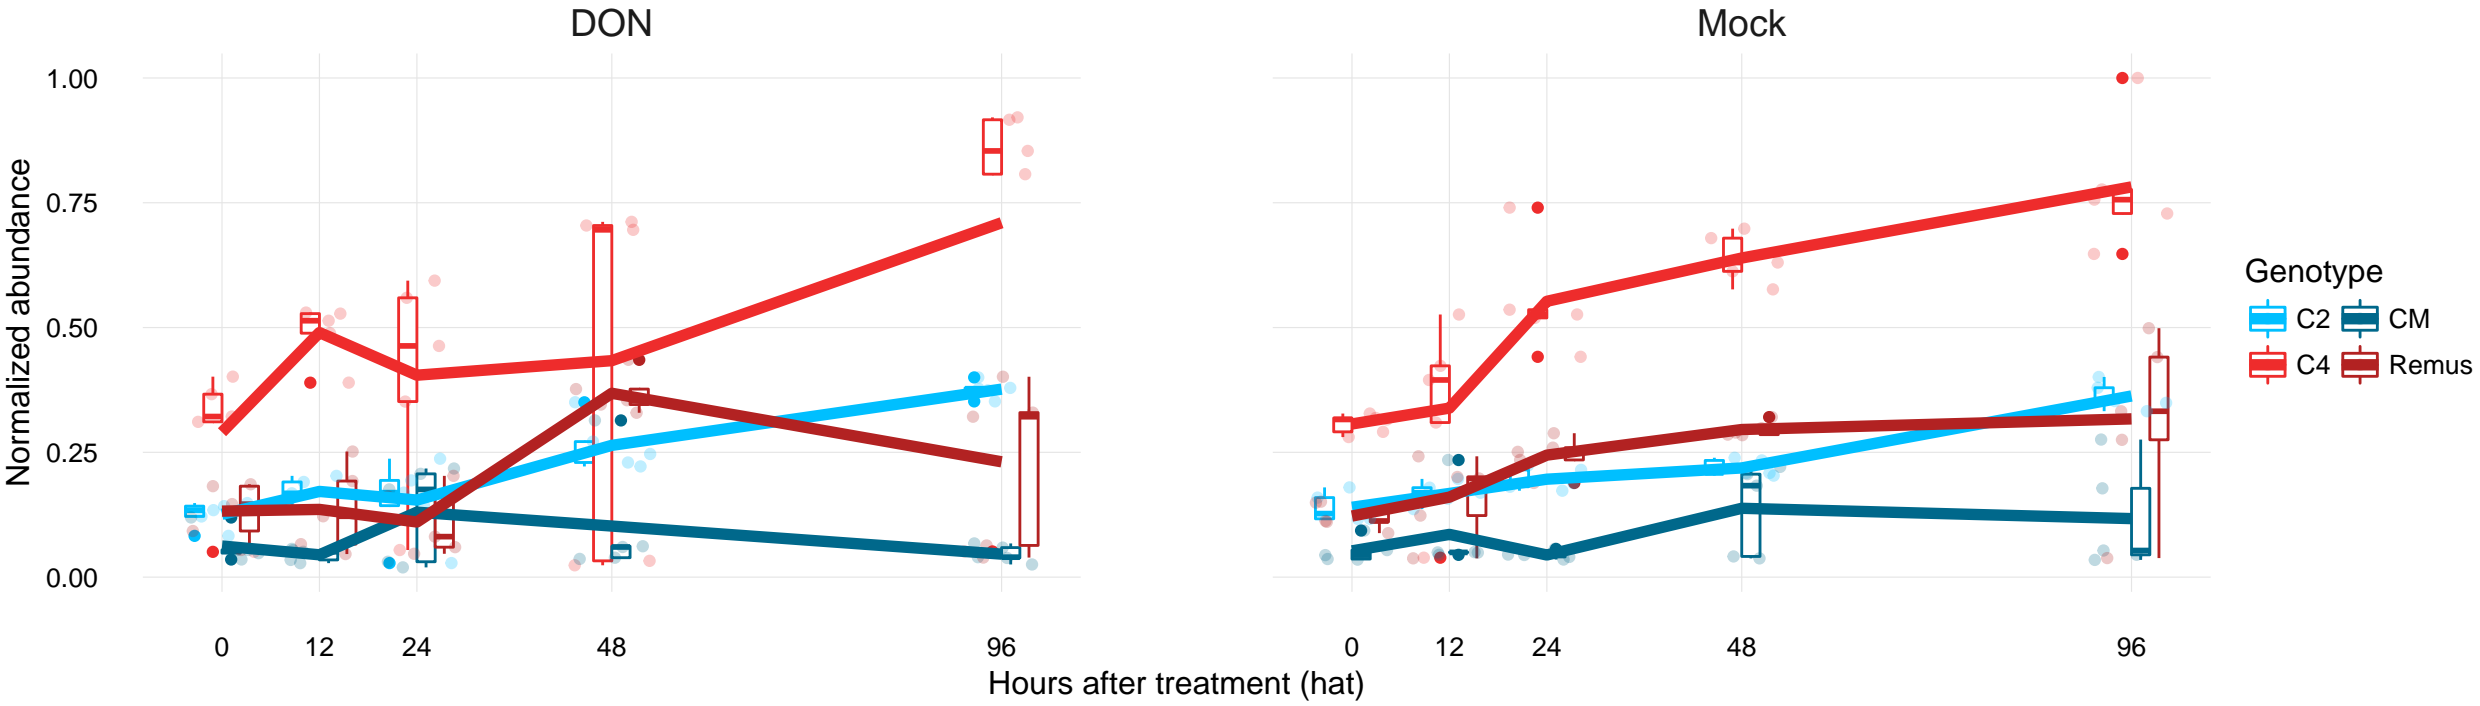

# A.52

Annotated as HCA derivative  
(1 database hit)

|                |                          |
|----------------|--------------------------|
| MZ             | 343.1024                 |
| RT             | 12.22 min                |
| Normalization  | Directly via KPX samples |
| Cluster        | –                        |
| Cn total / Phe | 15 /                     |

## C2, C4; different treatments

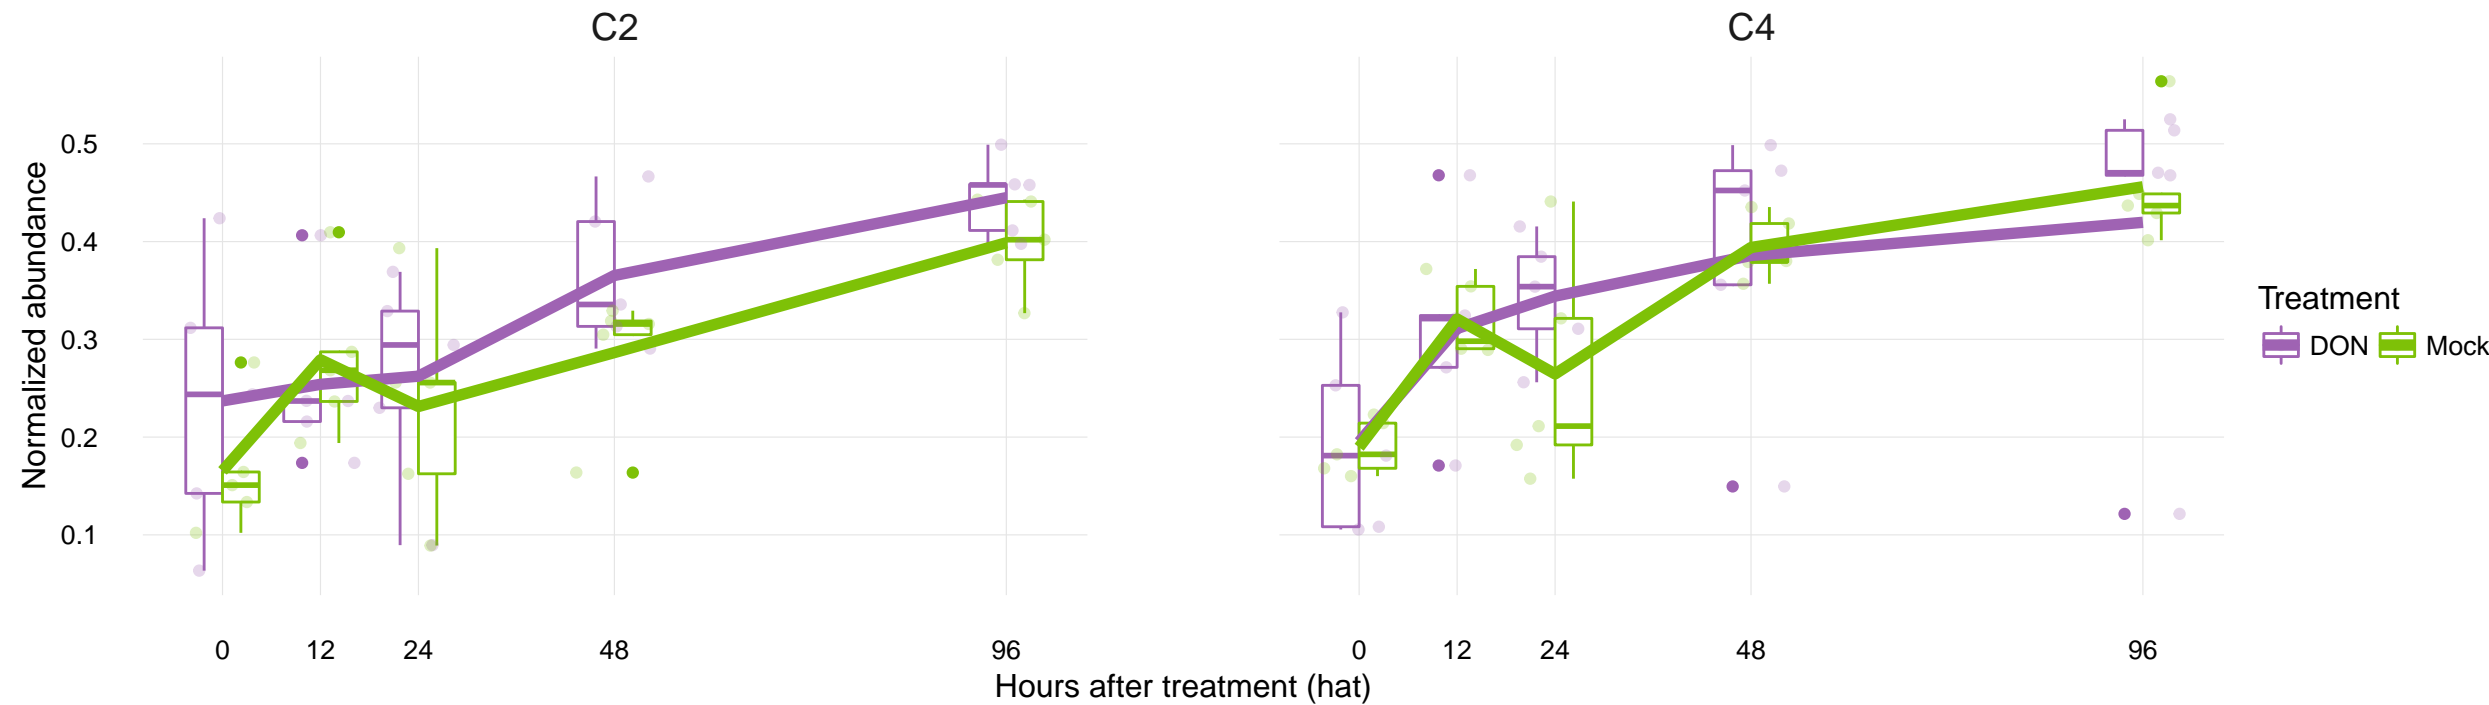

## DON, Mock; different genotypes

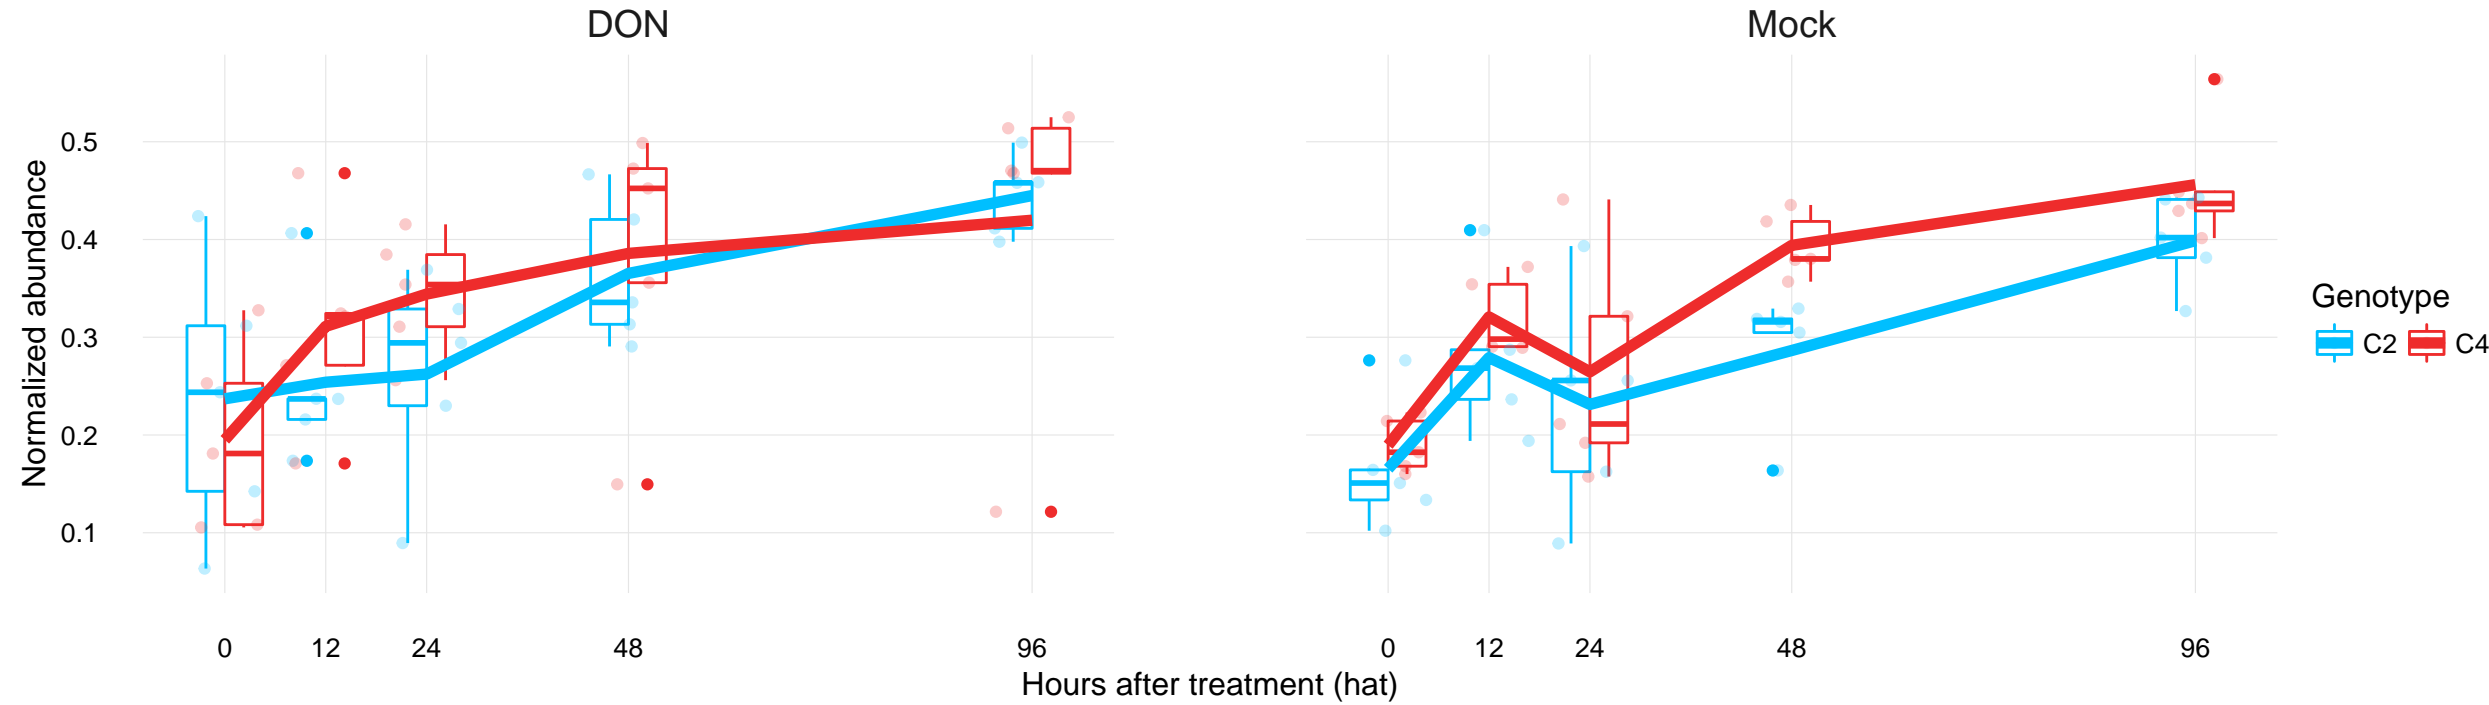

## CM, Remus; different treatments

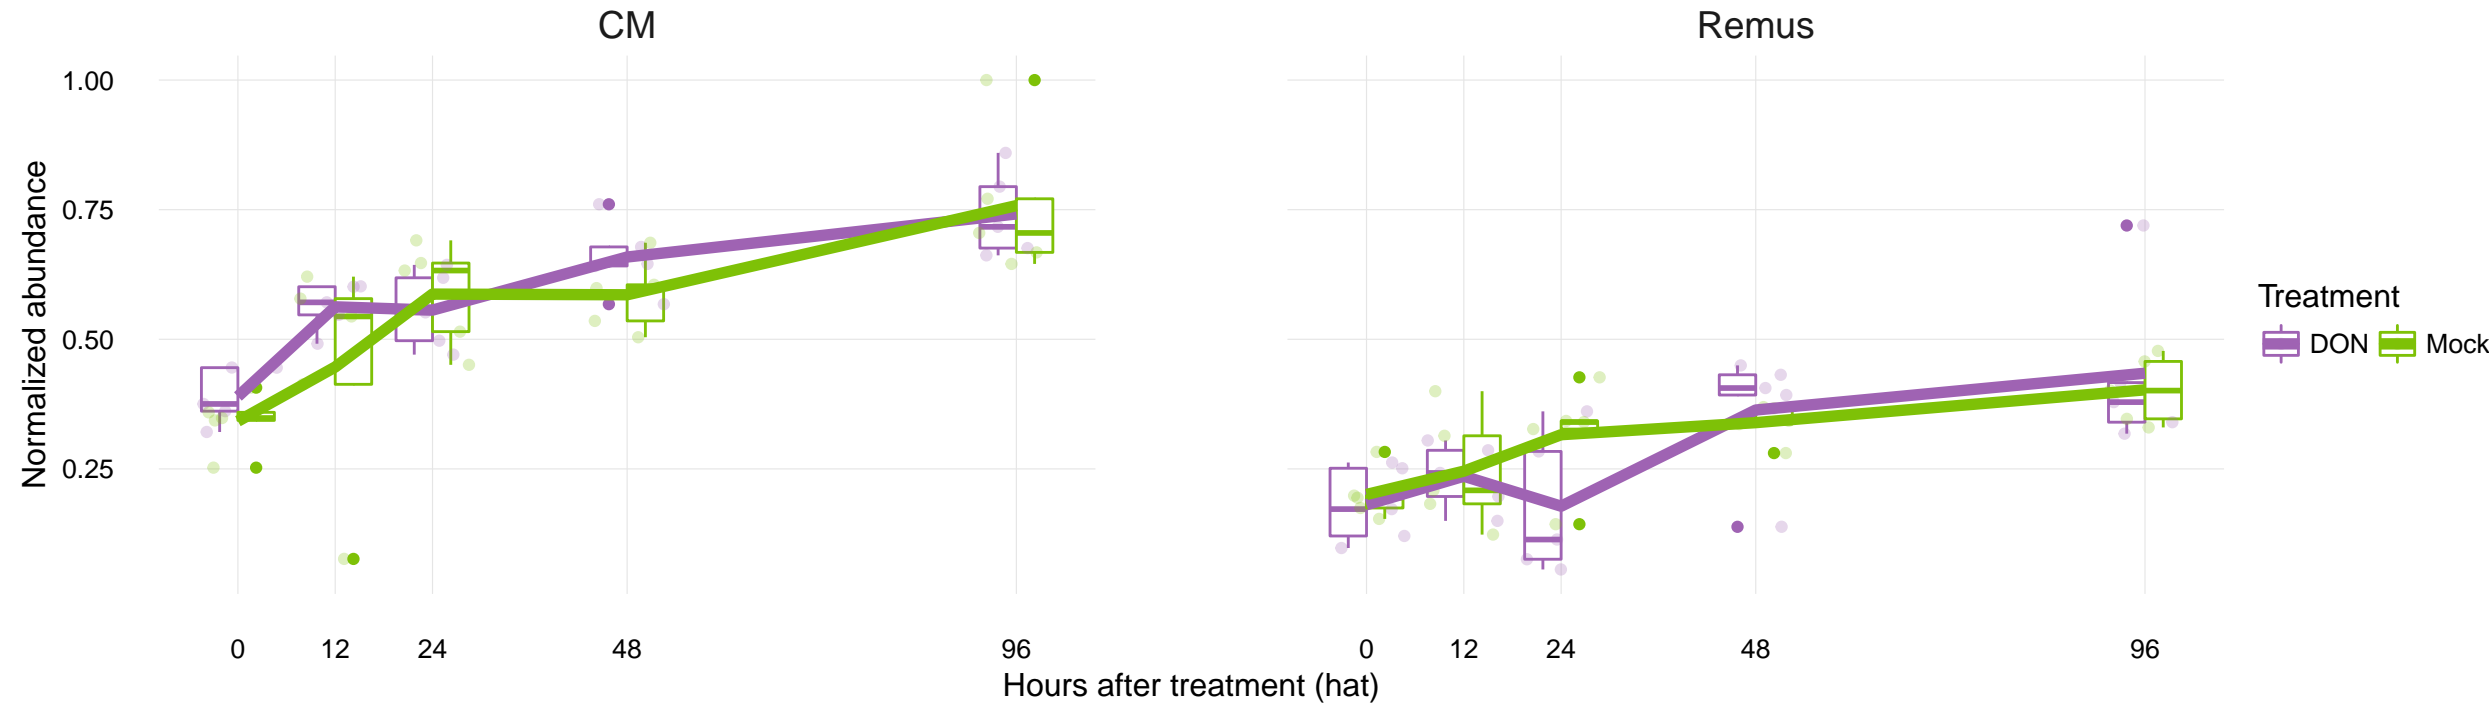

## DON, Mock; all four genotypes

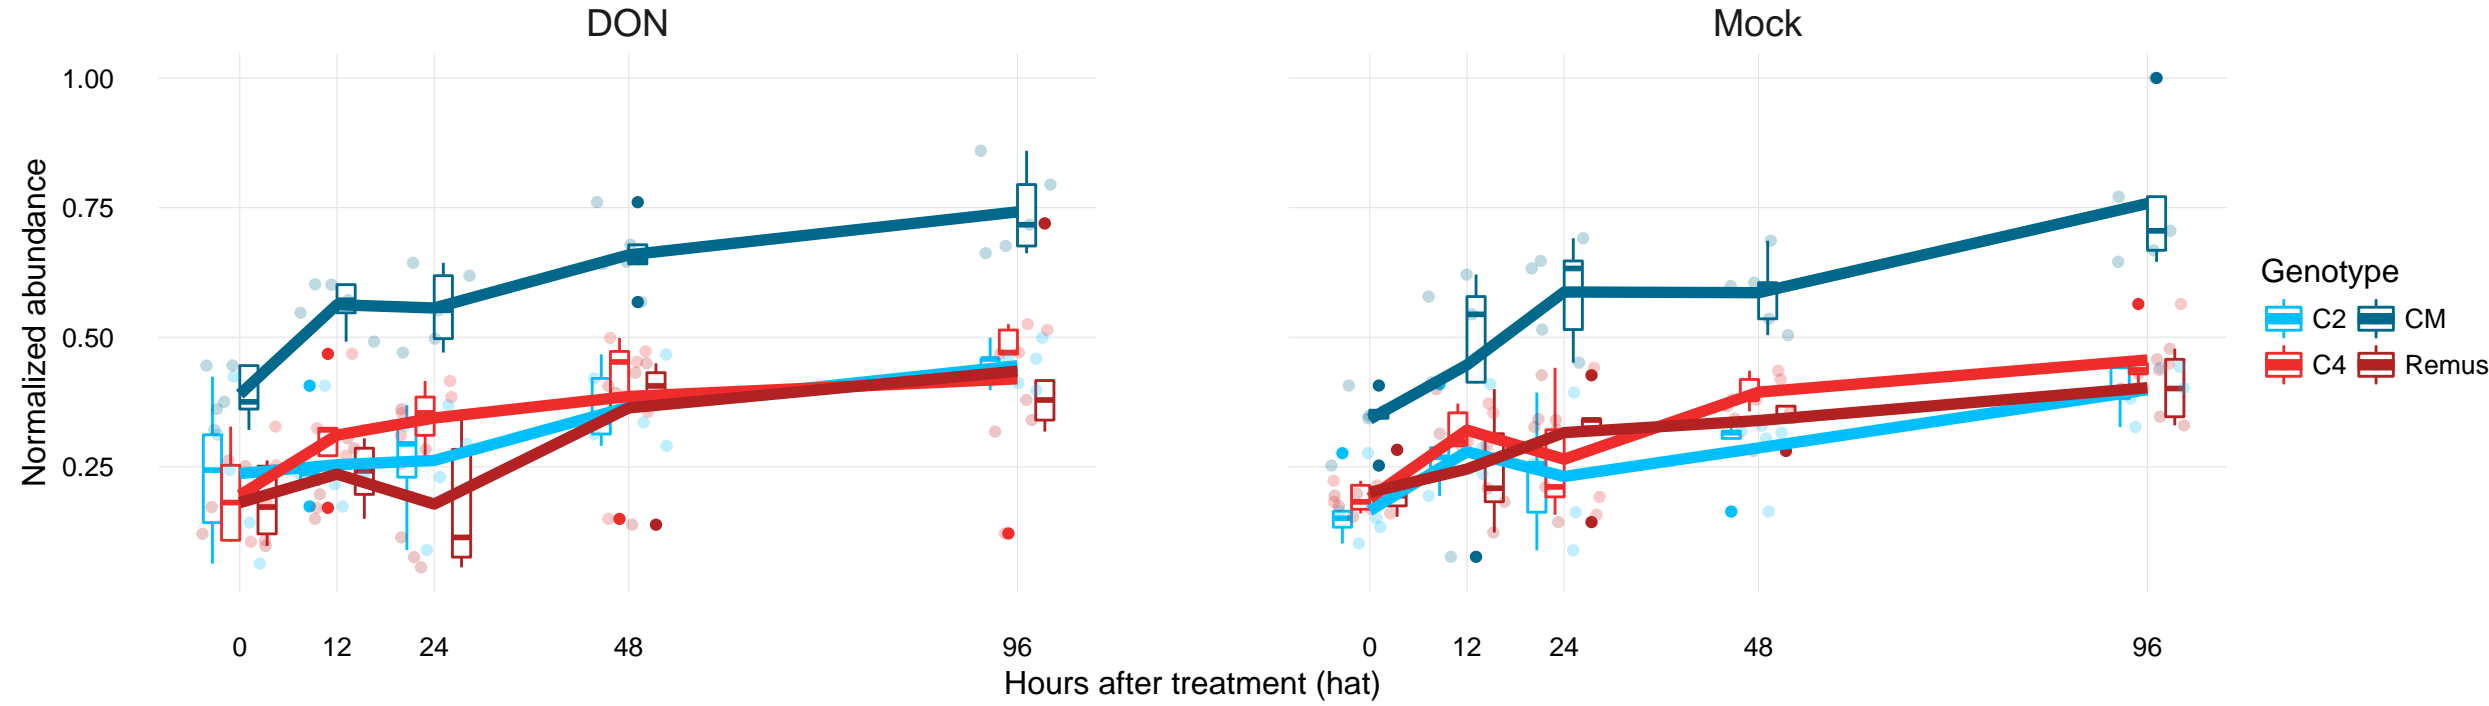

# A.131

Annotated as others (Coumarins)  
(1 database hit)

|                |                          |
|----------------|--------------------------|
| MZ             | 177.0546                 |
| RT             | 21.16 min                |
| Normalization  | Directly via KPX samples |
| Cluster        | –                        |
| Cn total / Phe | 10 / 9                   |

## C2, C4; different treatments

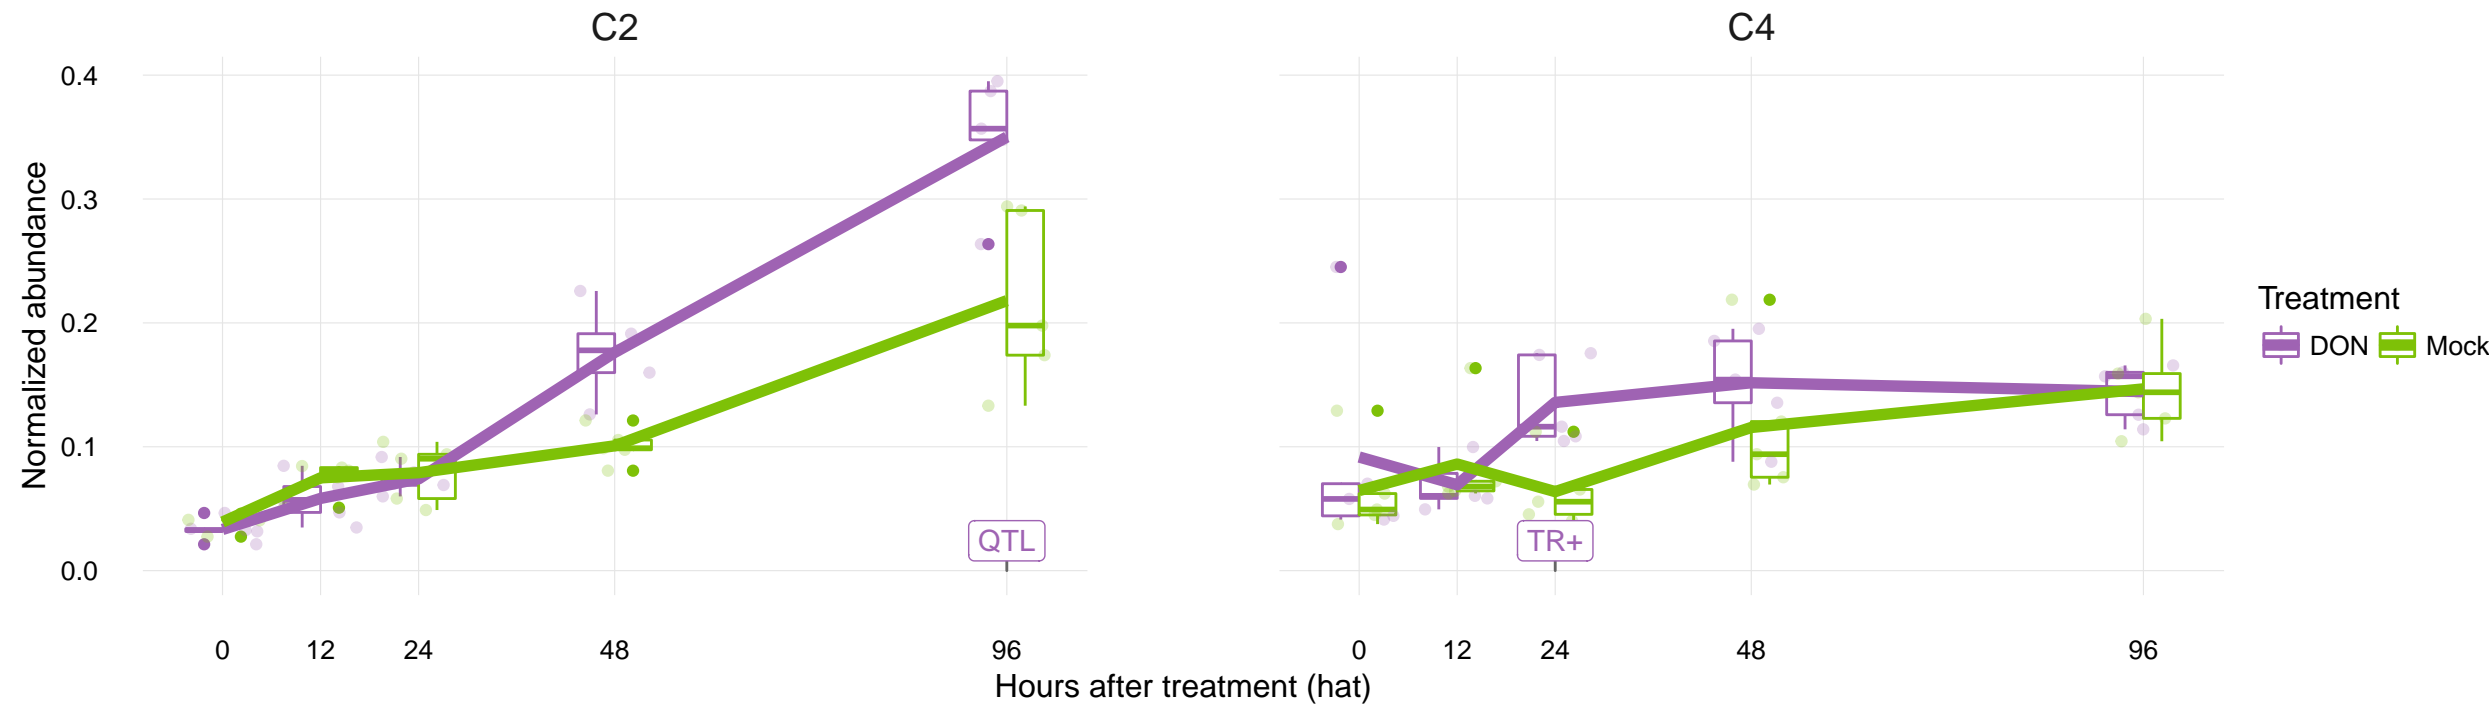

## DON, Mock; different genotypes

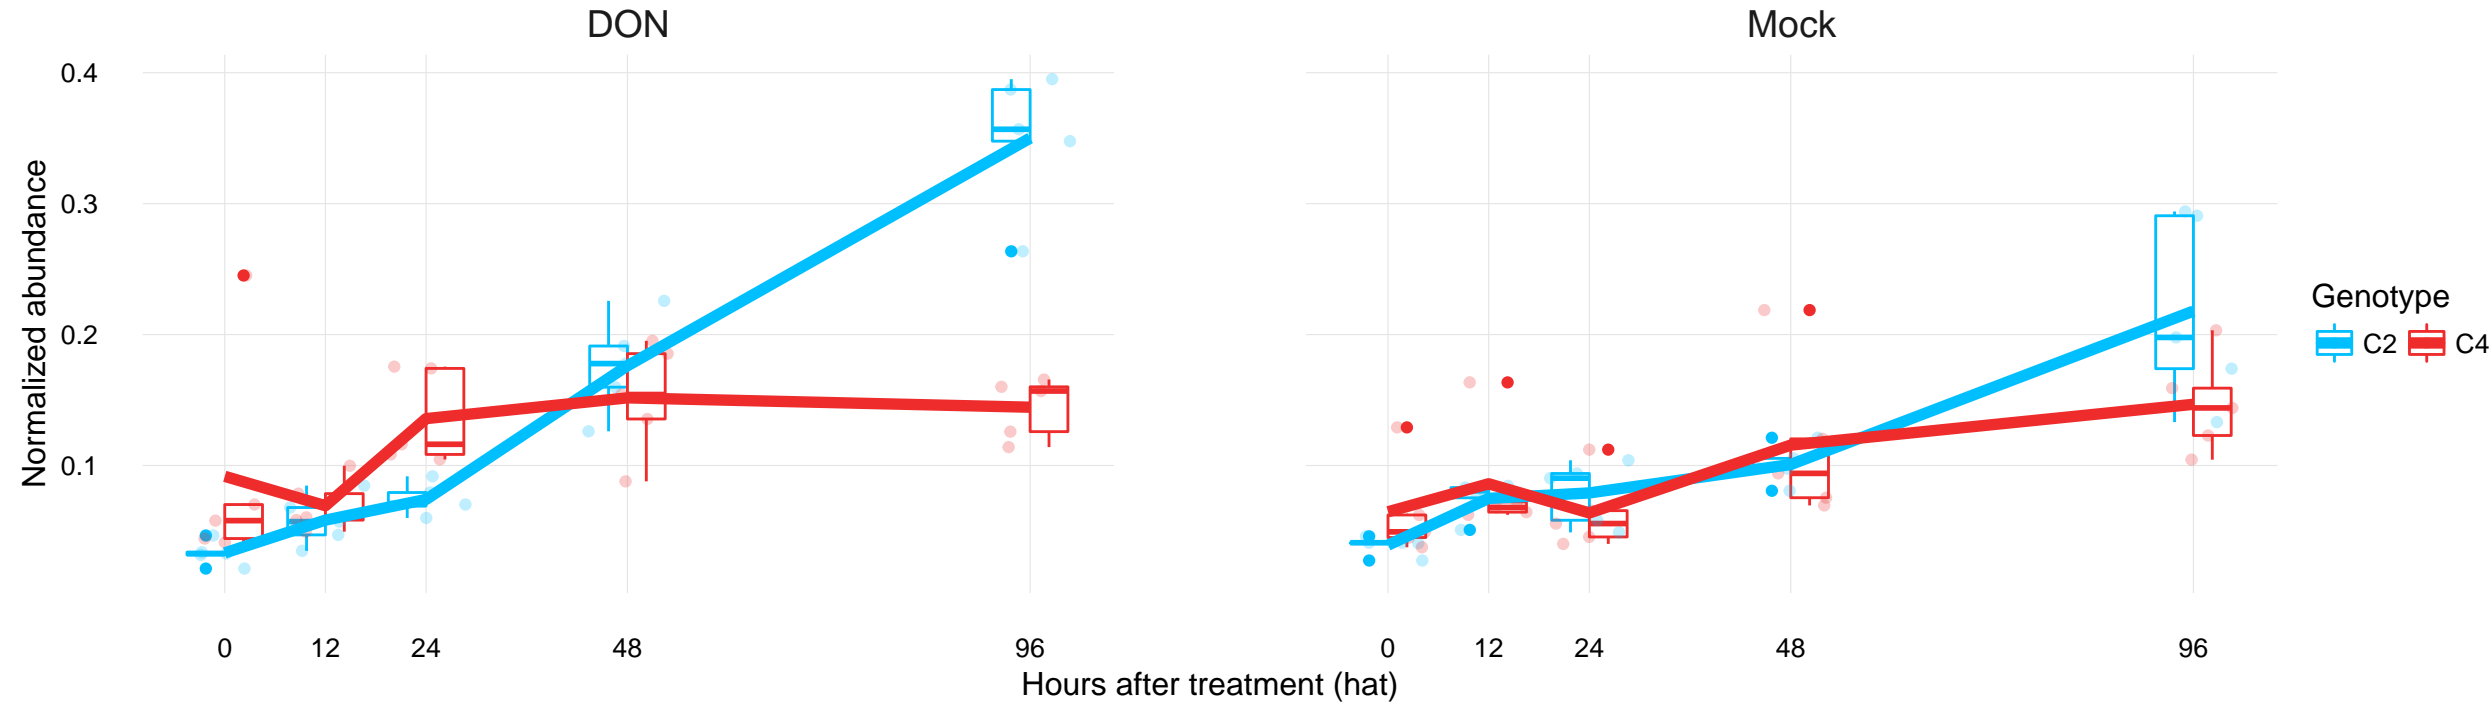

## CM, Remus; different treatments

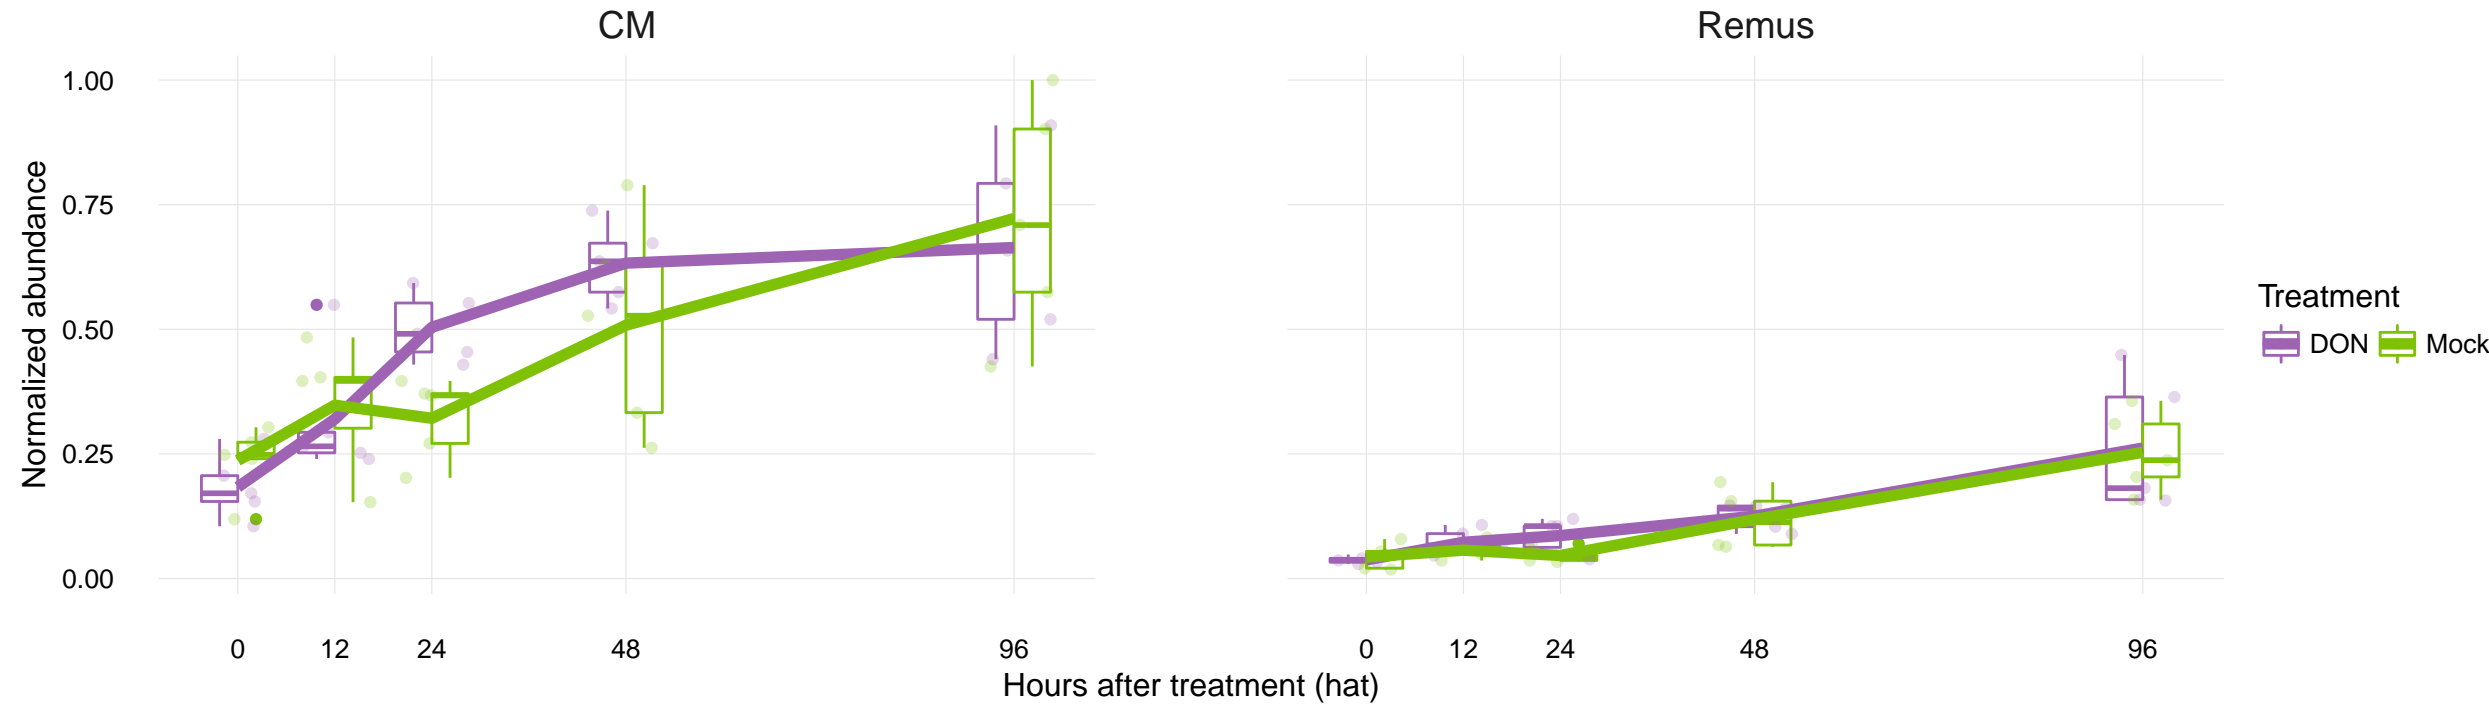

## DON, Mock; all four genotypes

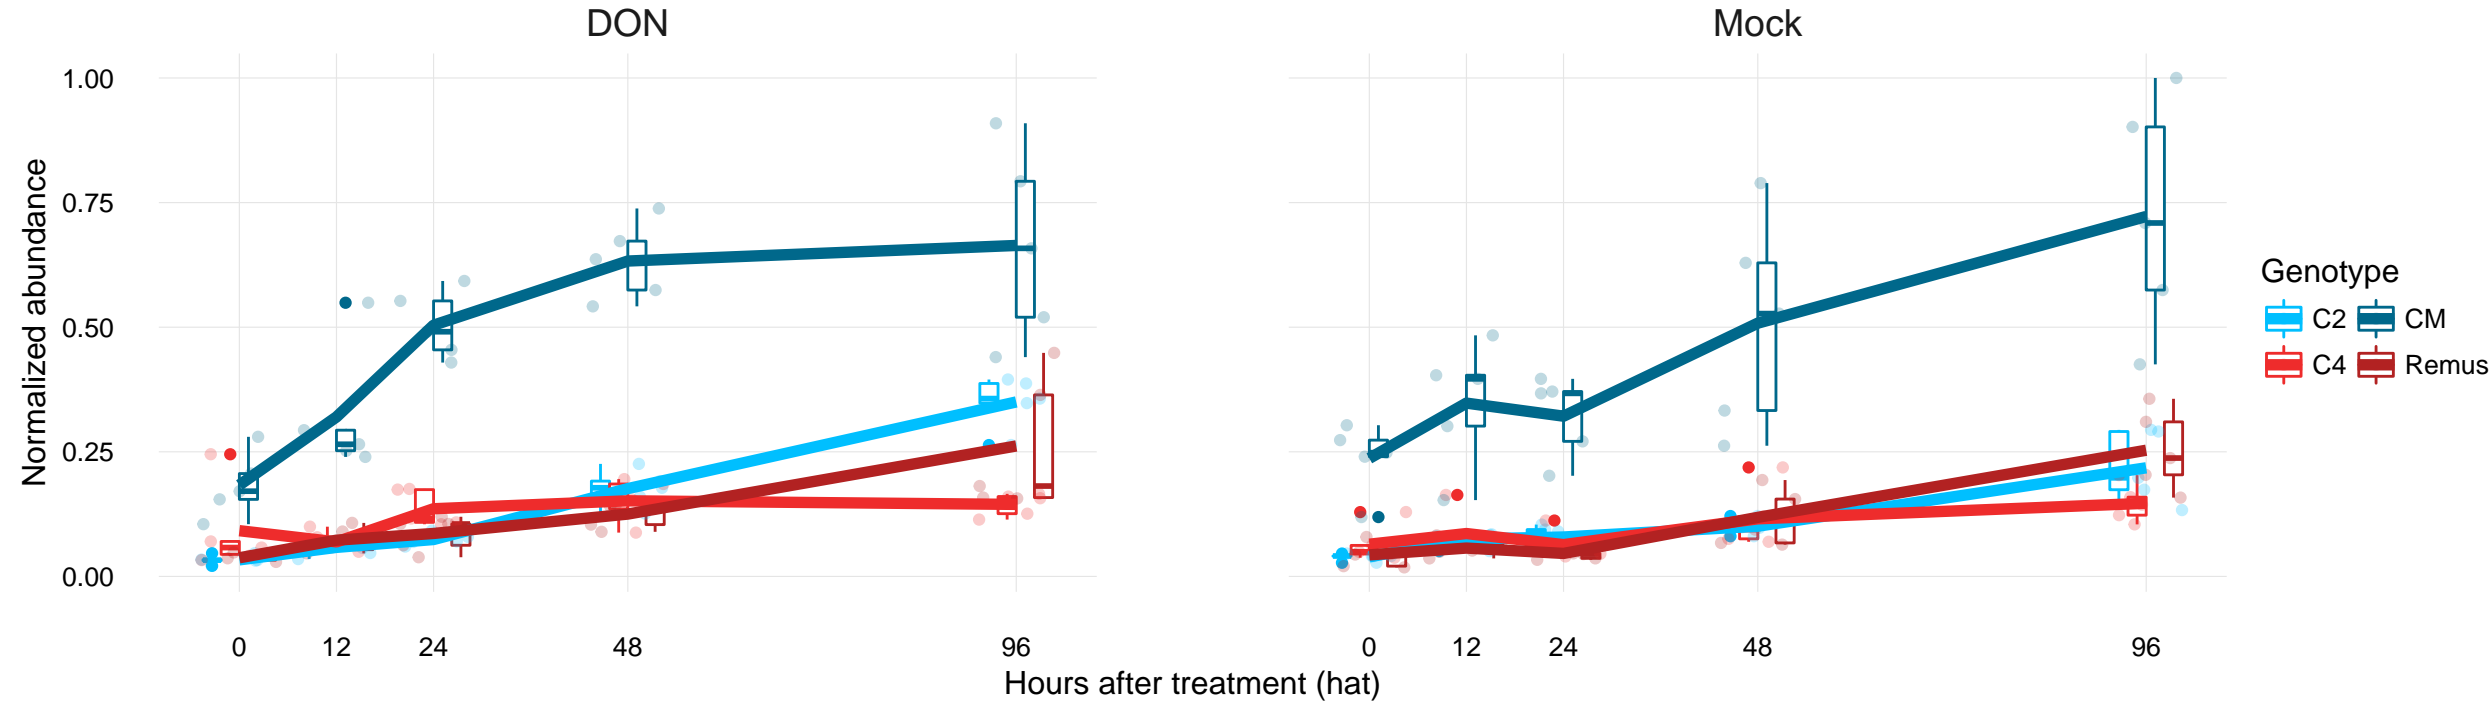

# A.128

Annotated as Flavonoid  
(25 database hits)

|                |                          |
|----------------|--------------------------|
| MZ             | 405.1181                 |
| RT             | 20.88 min                |
| Normalization  | Directly via KPX samples |
| Cluster        | –                        |
| Cn total / Phe | 20 /                     |

## C2, C4; different treatments

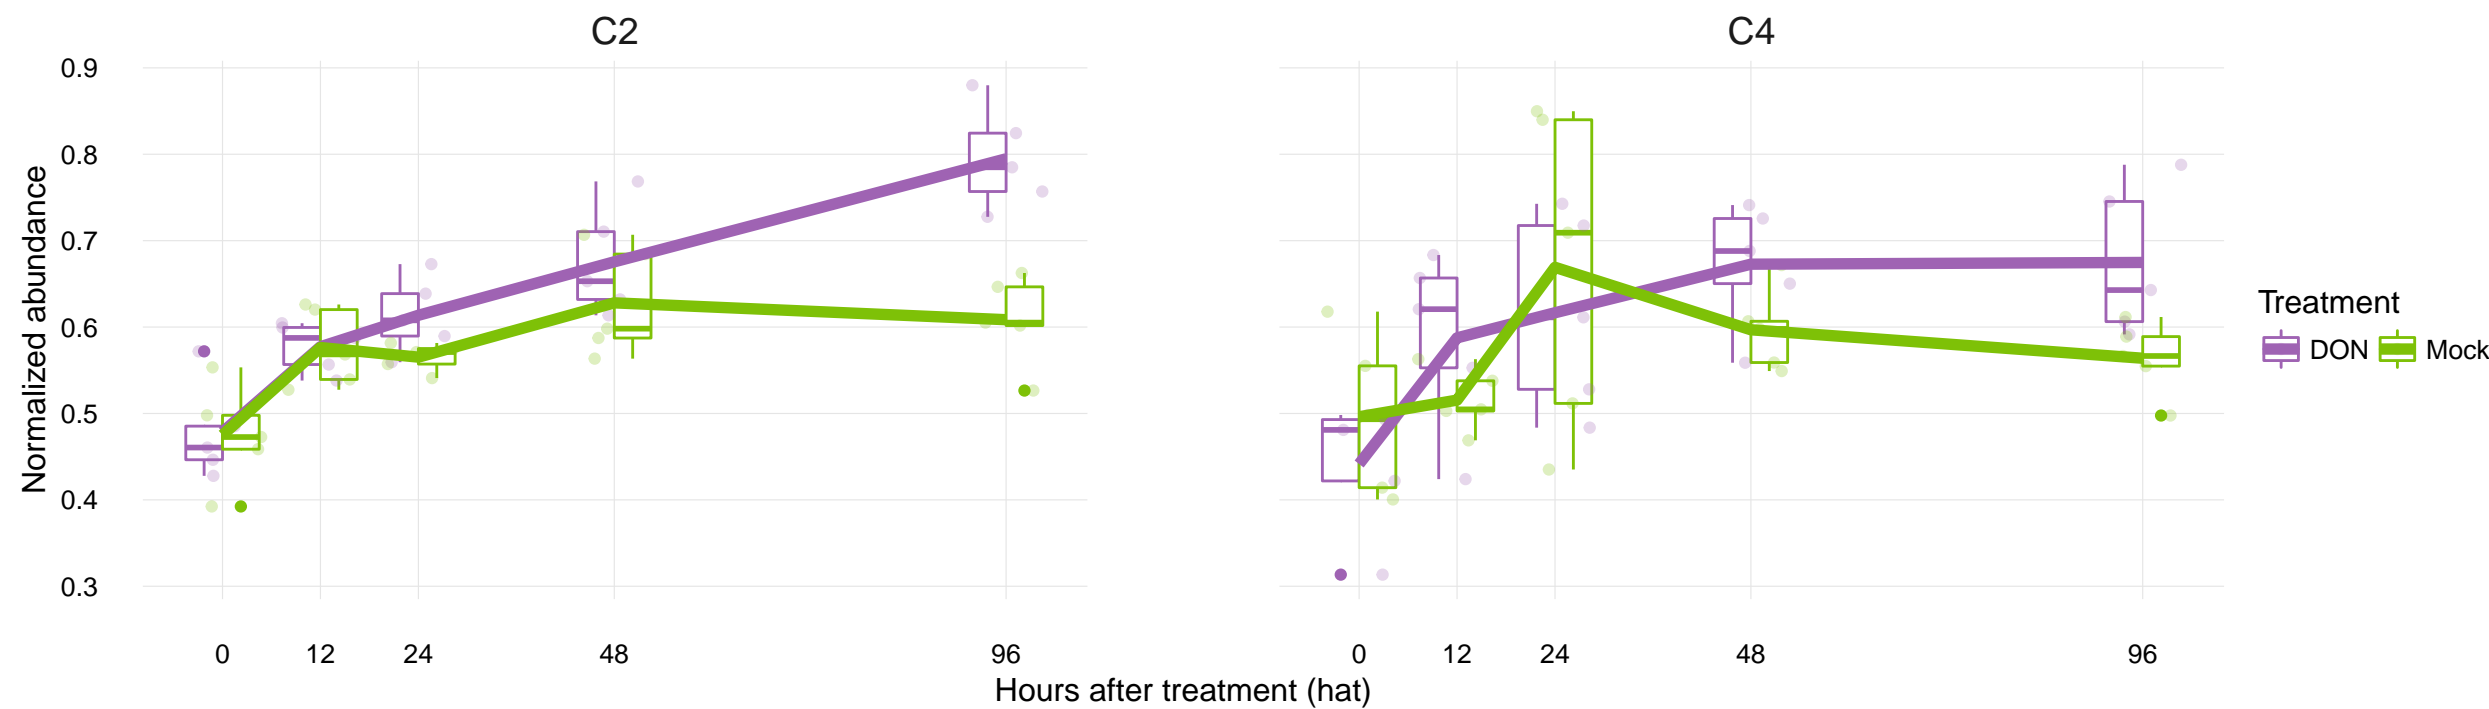

## DON, Mock; different genotypes

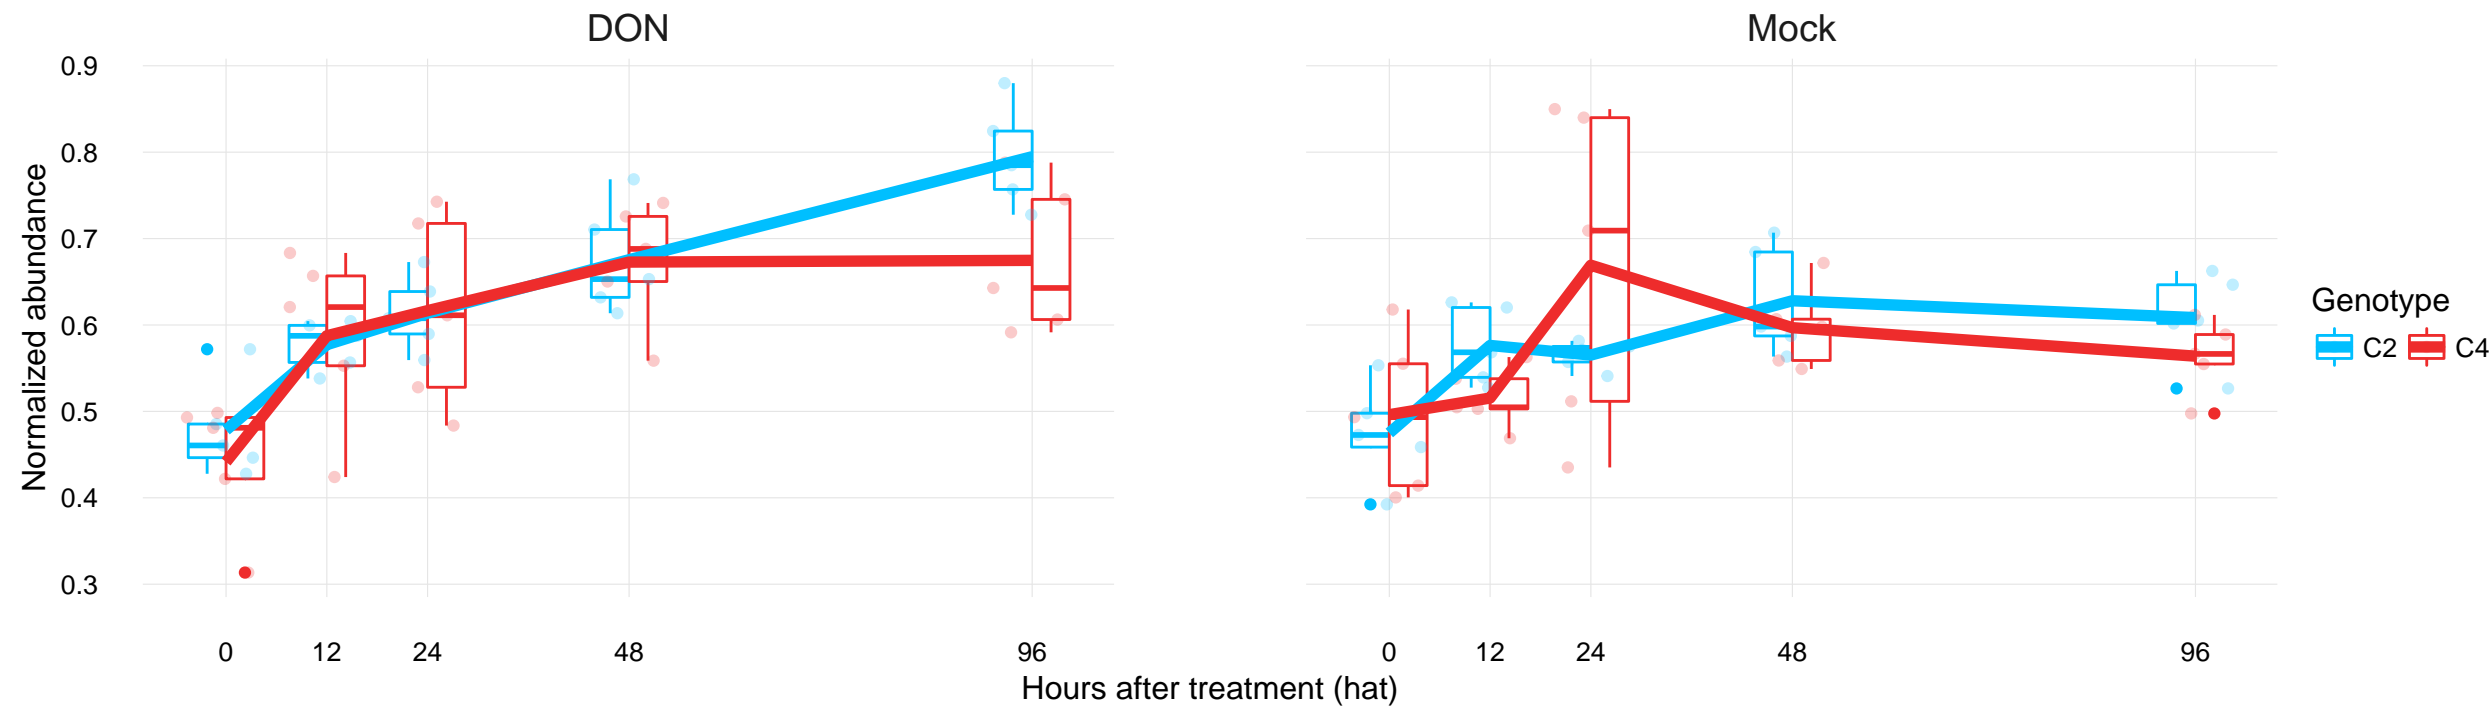

## CM, Remus; different treatments

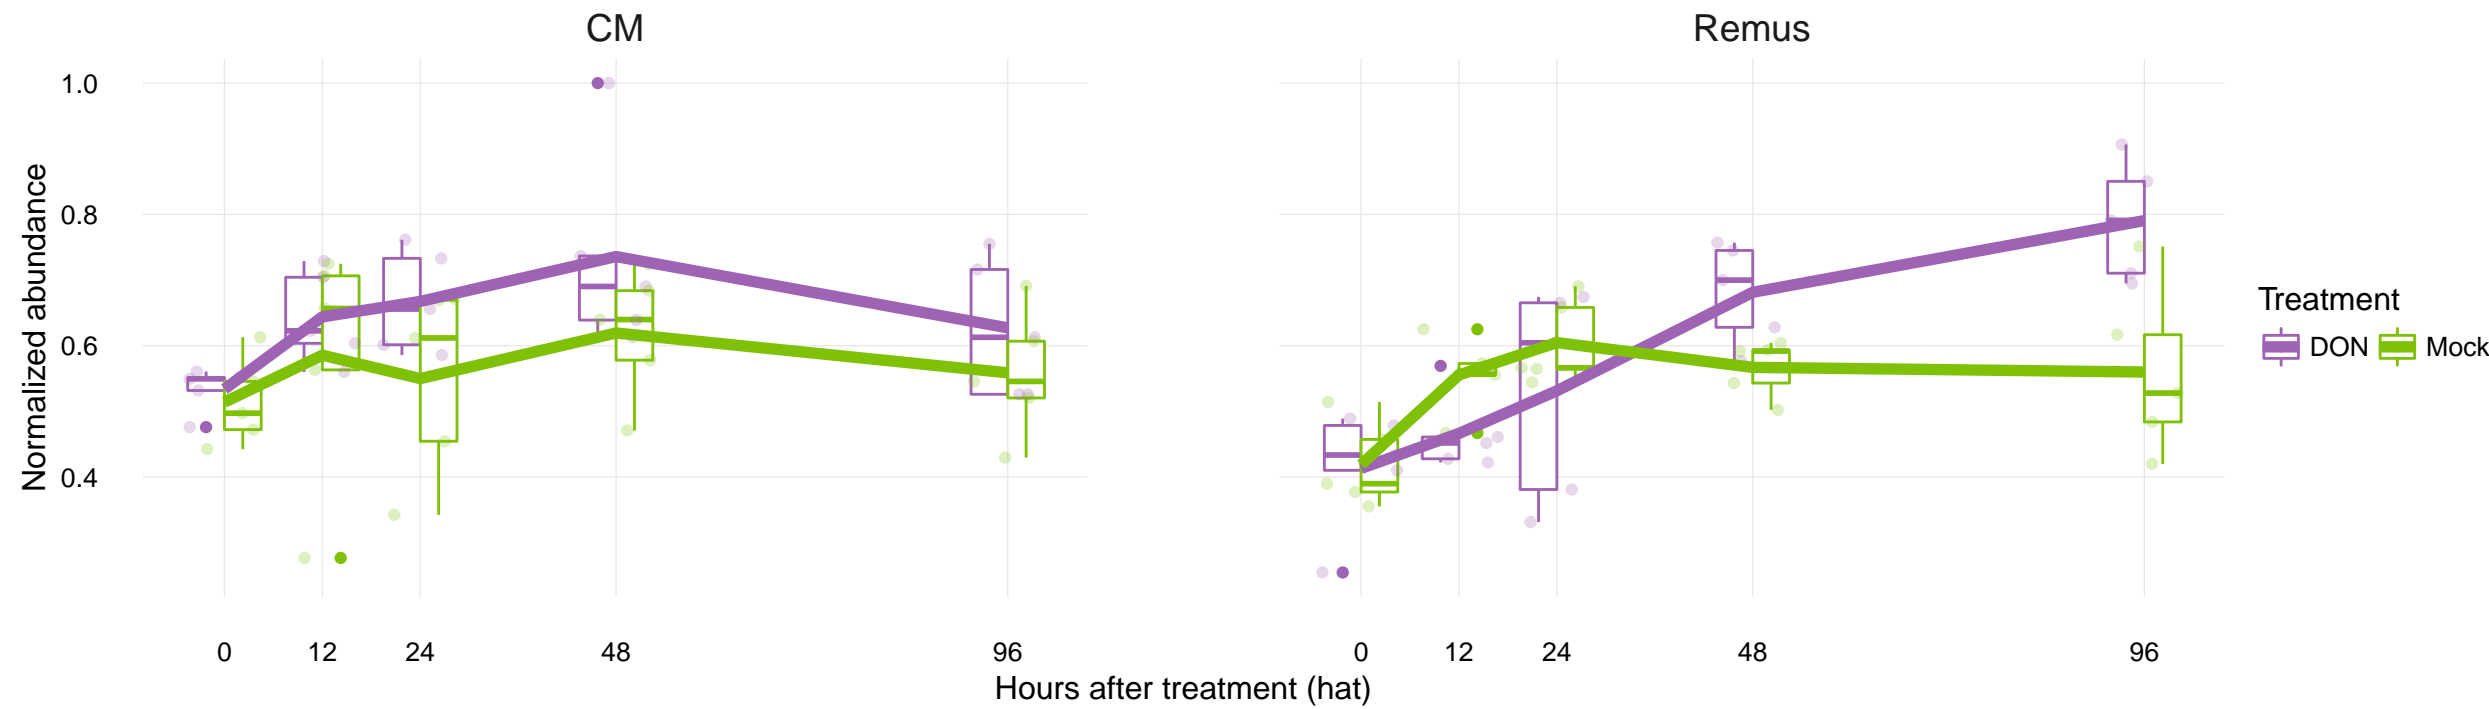

## DON, Mock; all four genotypes

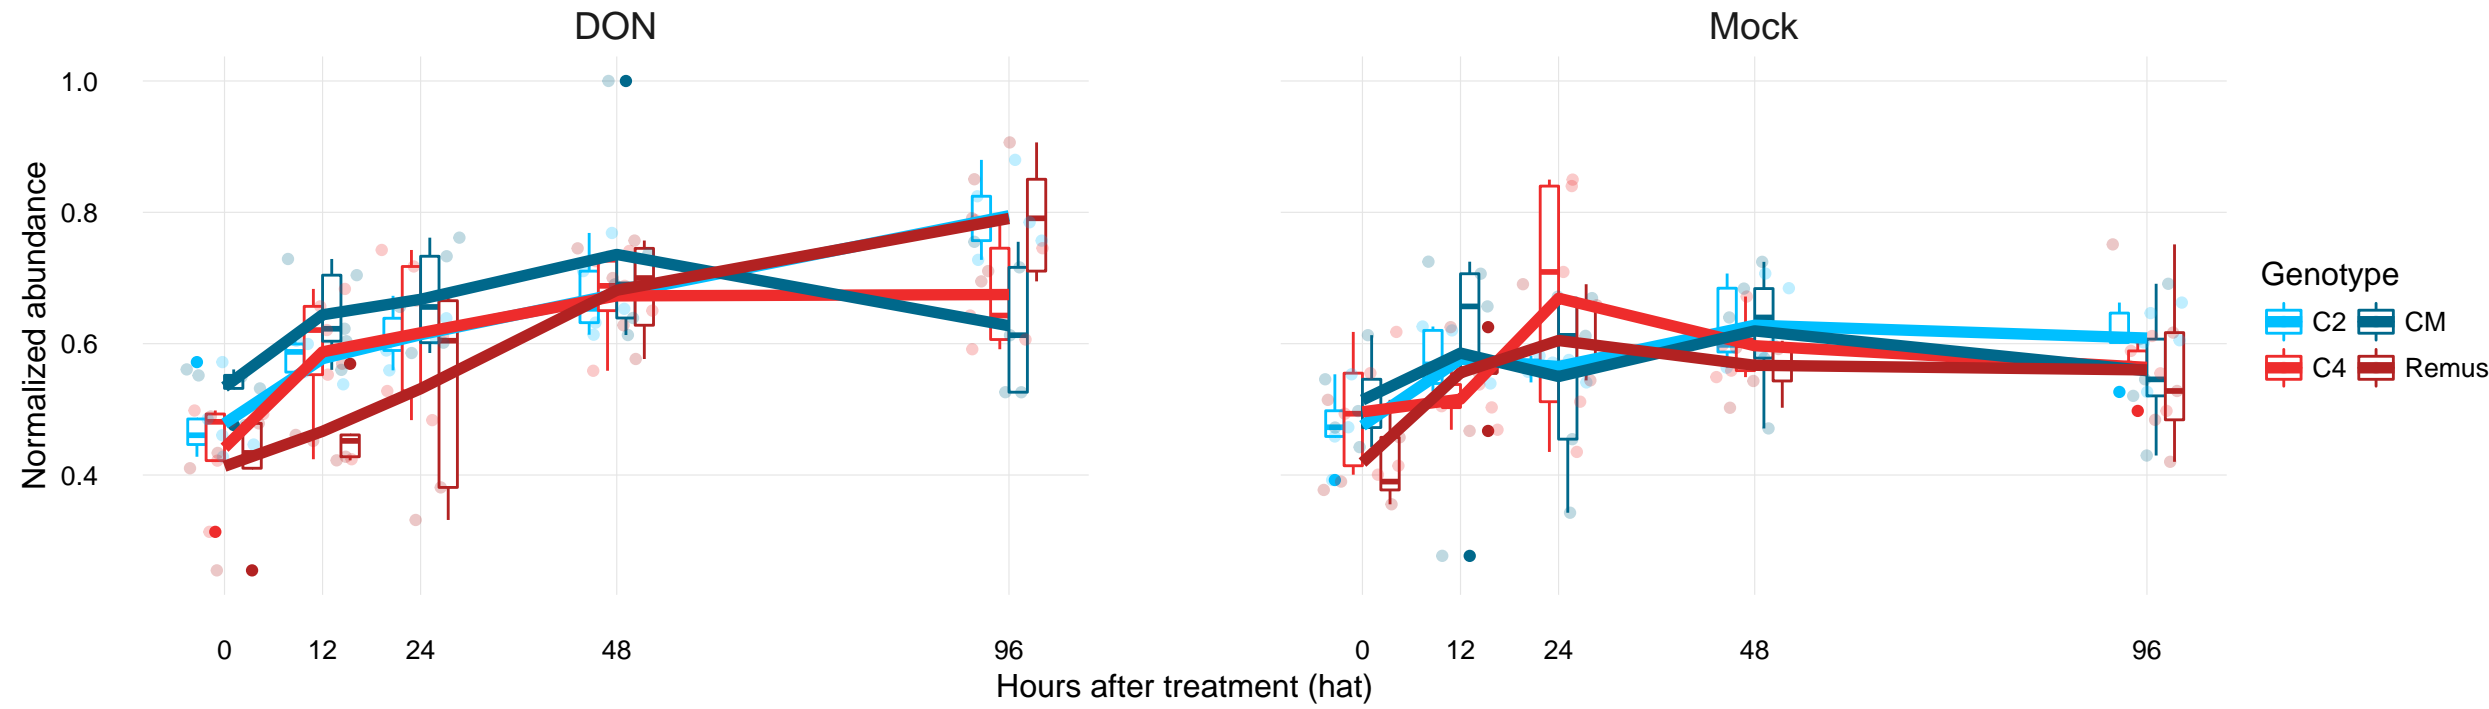



# A.135

Annotated as HCA derivative  
(1 database hit)

|                |                                                |
|----------------|------------------------------------------------|
| MZ             | 885.2422                                       |
| RT             | 21.51 min                                      |
| Normalization  | Indirectly via surrogate<br>in the KPX samples |
| Cluster        | —                                              |
| Cn total / Phe | 40 / Several: 9,18                             |

## C2, C4; different treatments

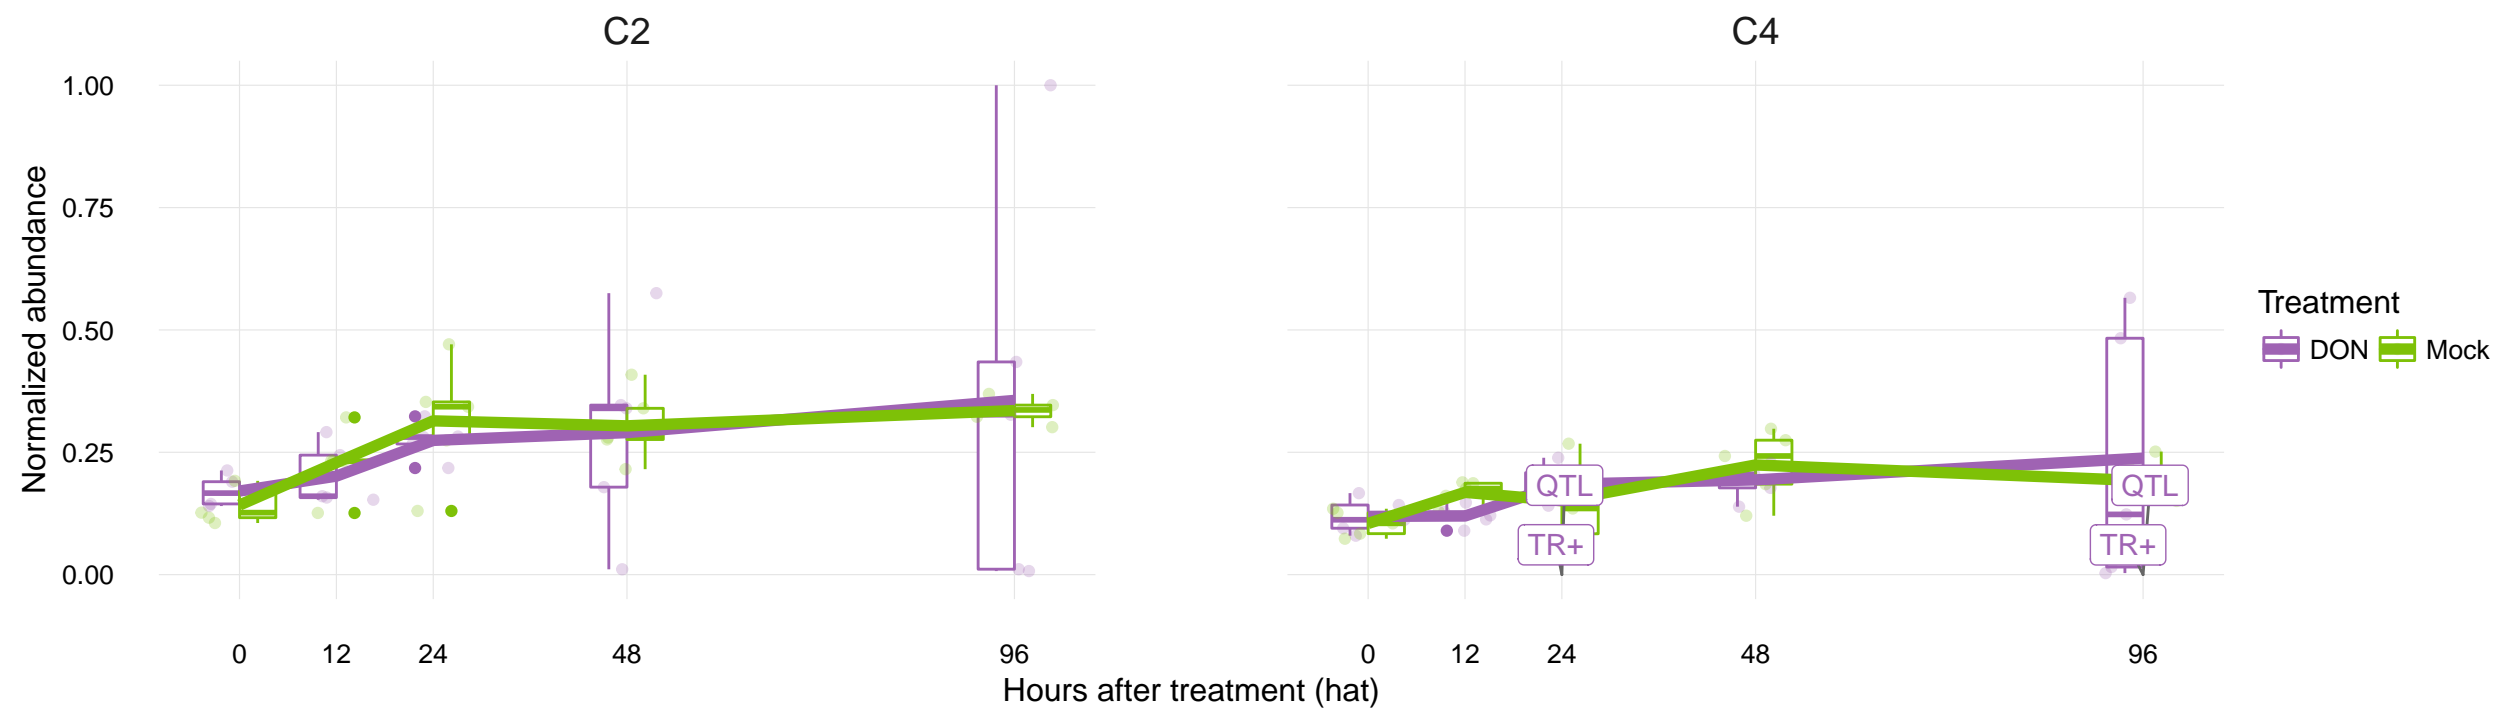

## DON, Mock; different genotypes

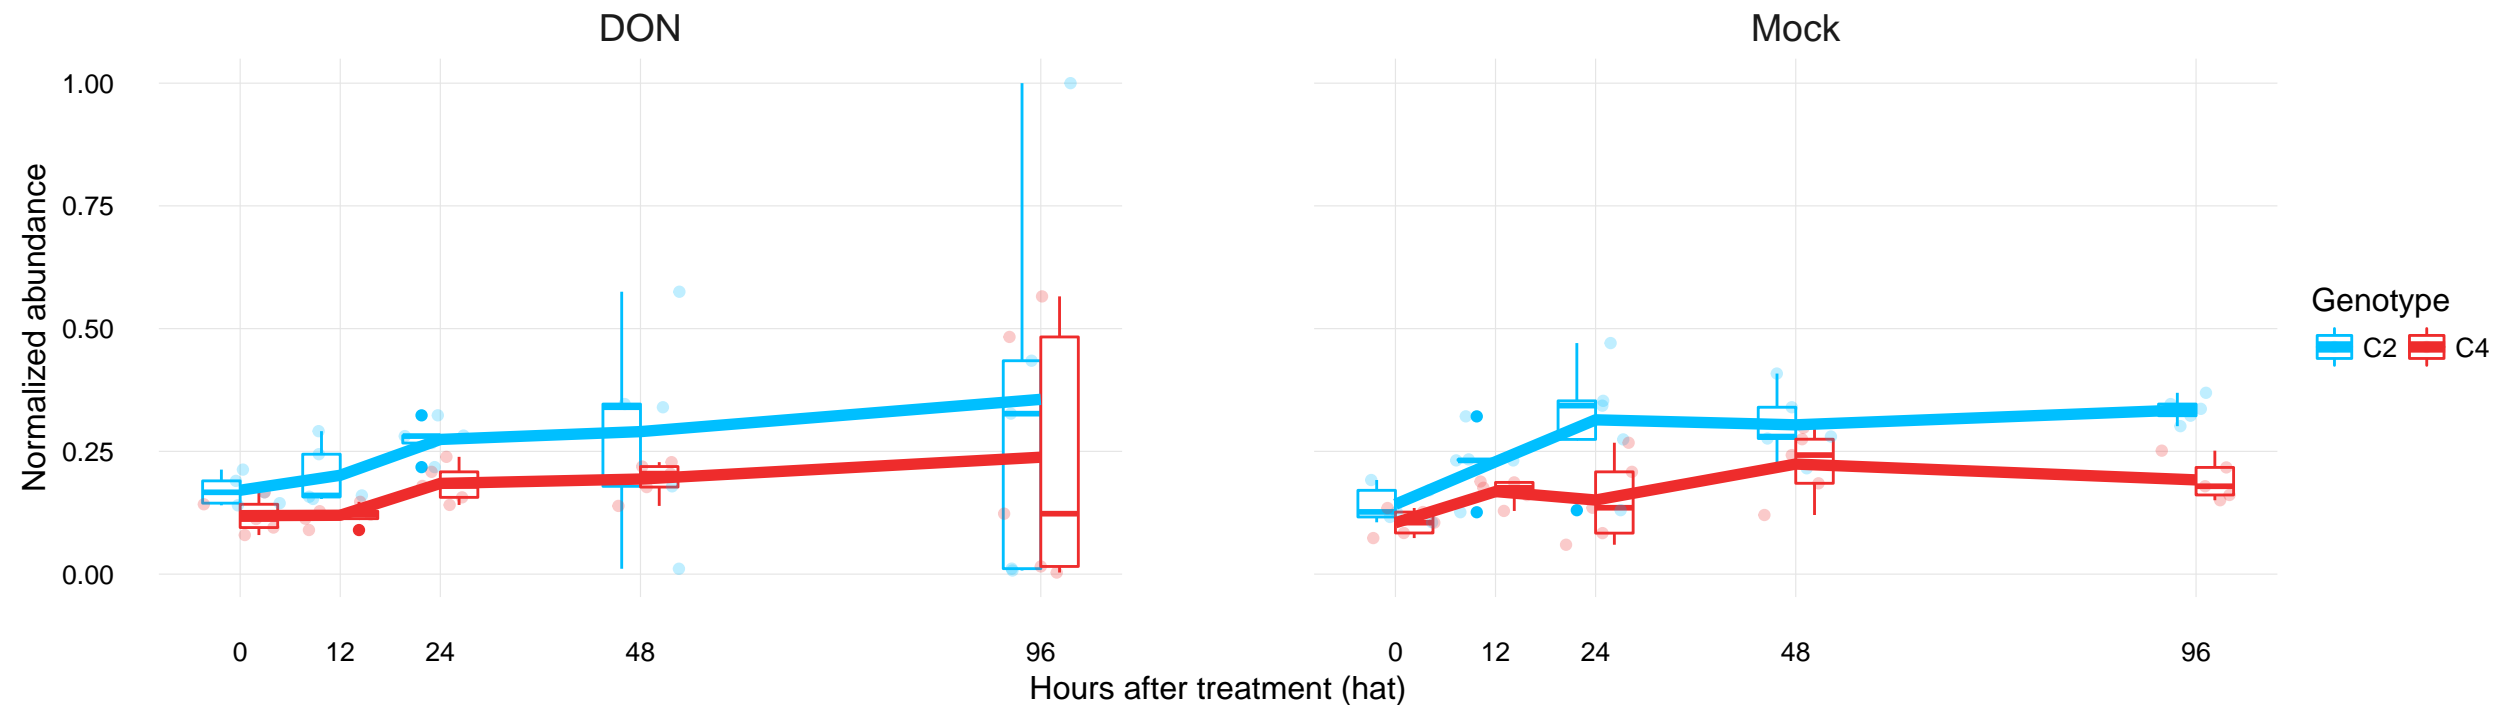

## CM, Remus; different treatments

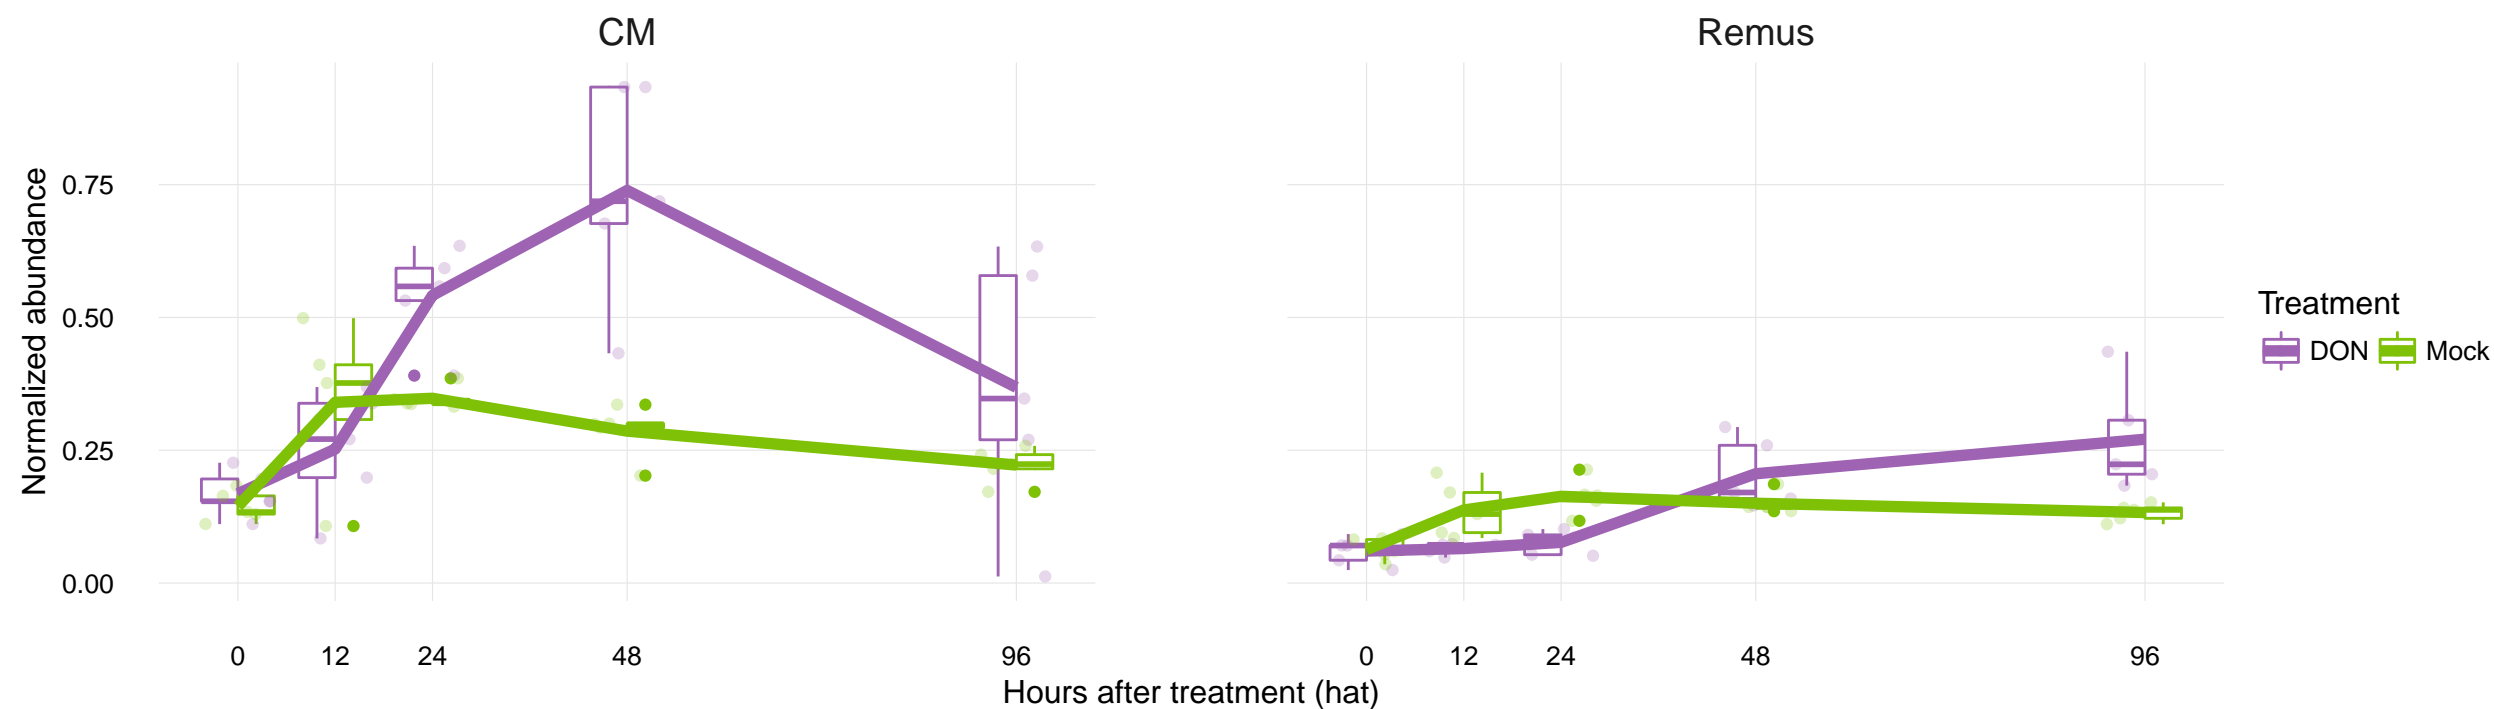

## DON, Mock; all four genotypes

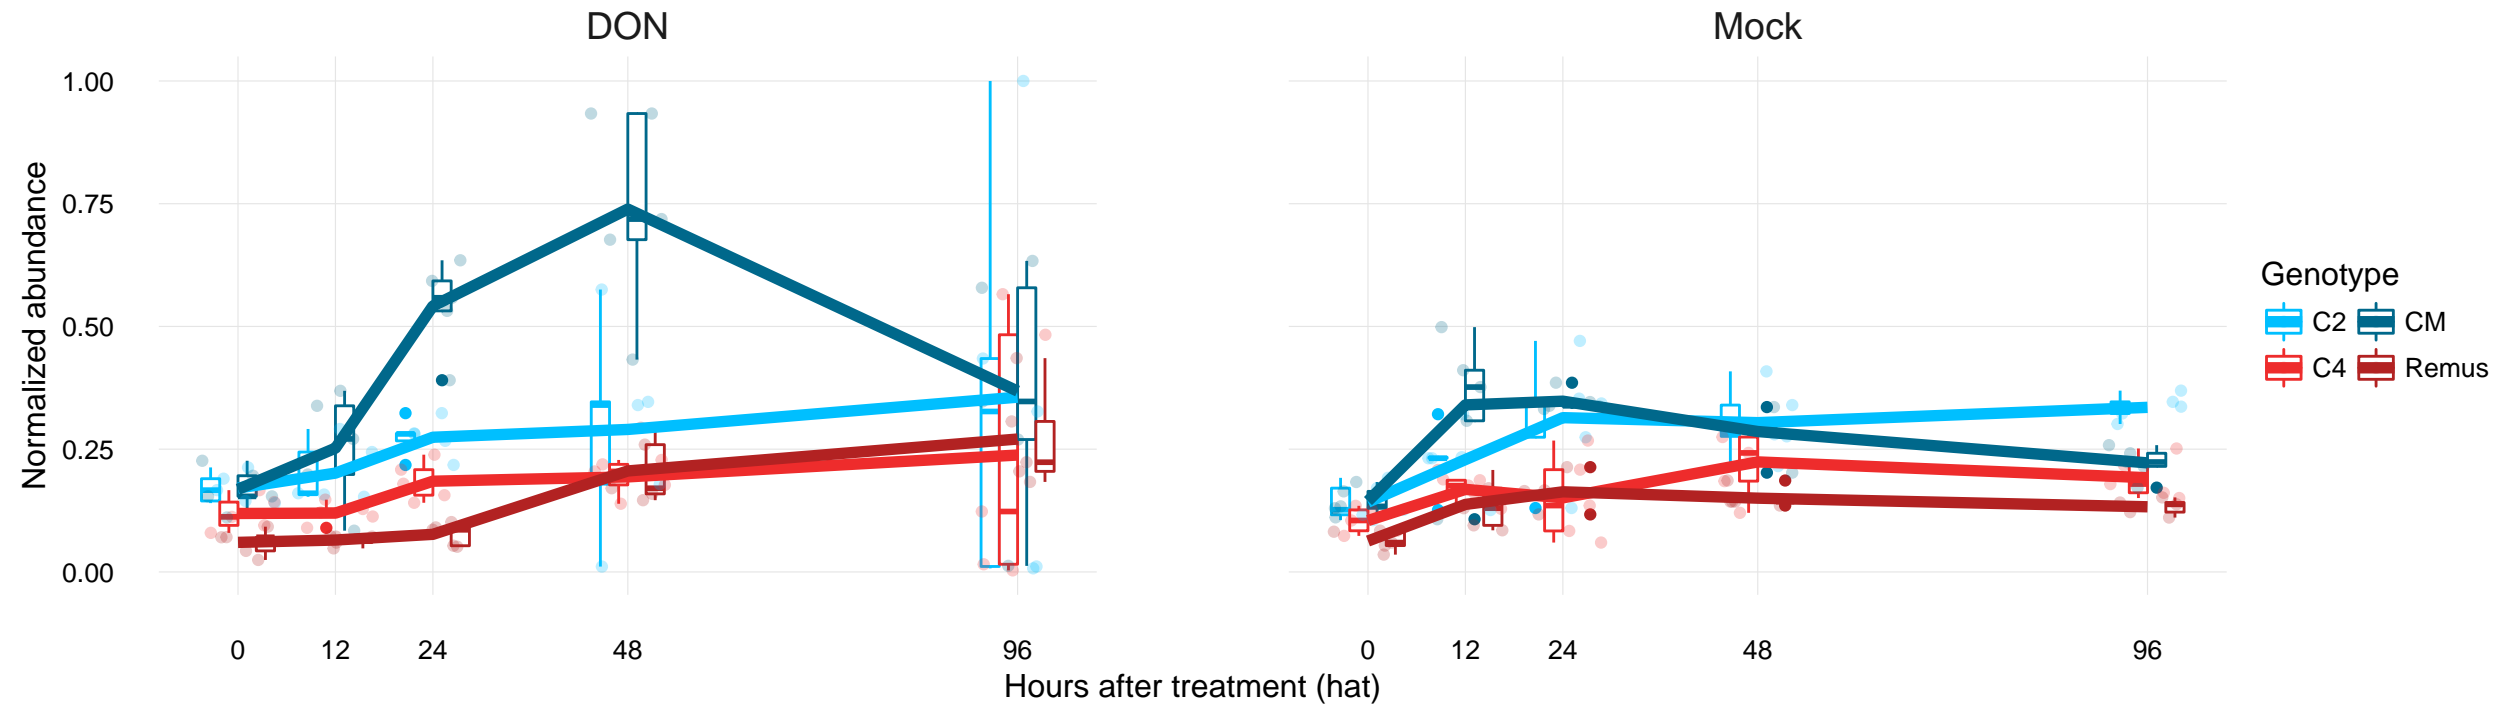

# A.21

Annotated as HCAA  
(2 database hits)

|                |                          |
|----------------|--------------------------|
| MZ             | 293.1611                 |
| RT             | 8.25 min                 |
| Normalization  | Directly via KPX samples |
| Cluster        | –                        |
| Cn total / Phe | 14 /                     |

## C2, C4; different treatments

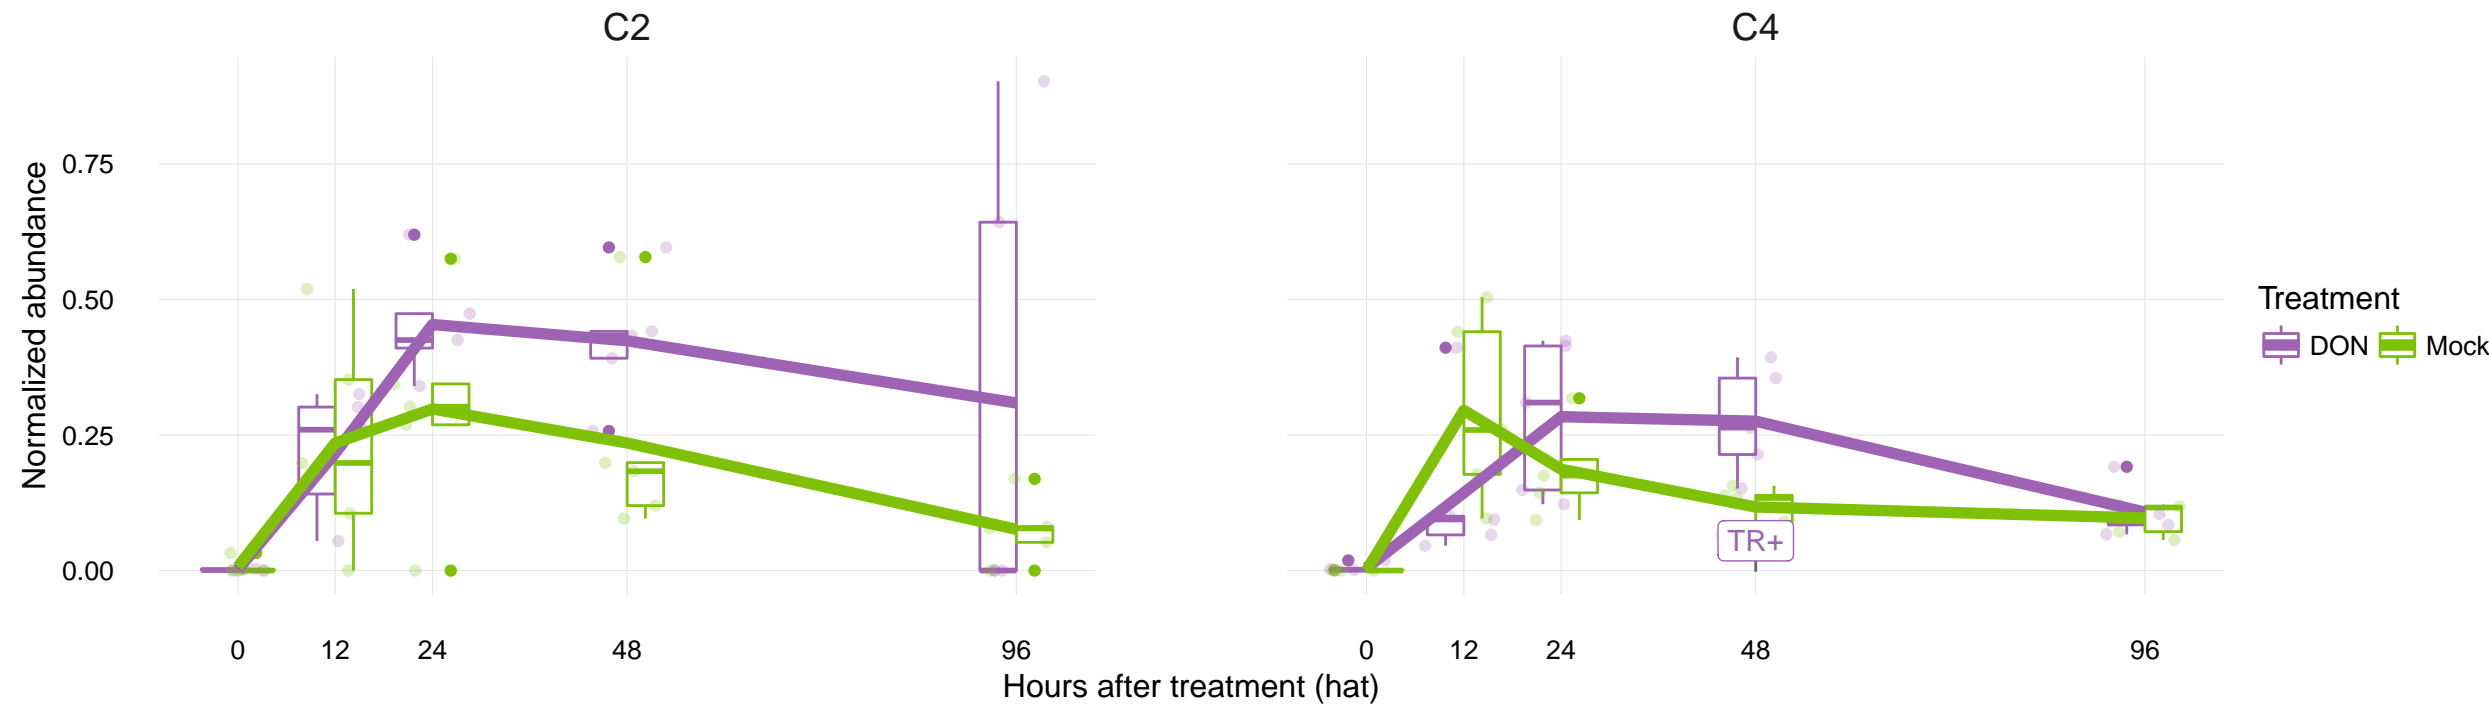

## DON, Mock; different genotypes

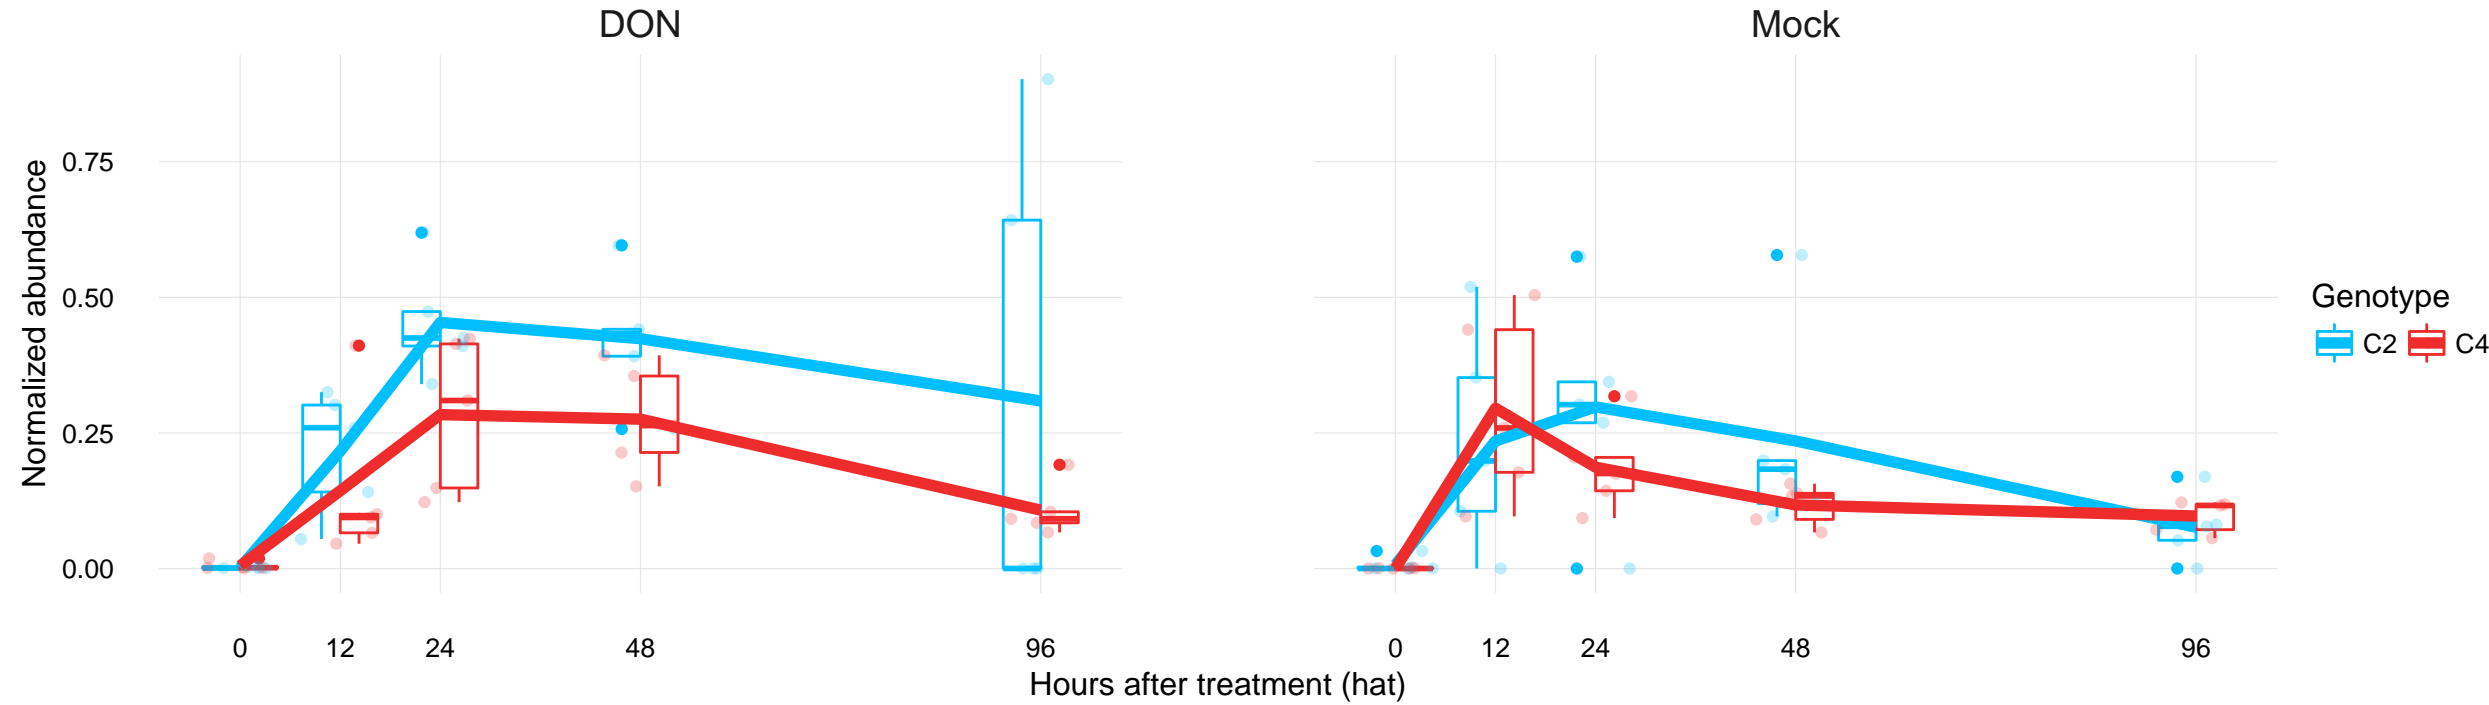

## CM, Remus; different treatments

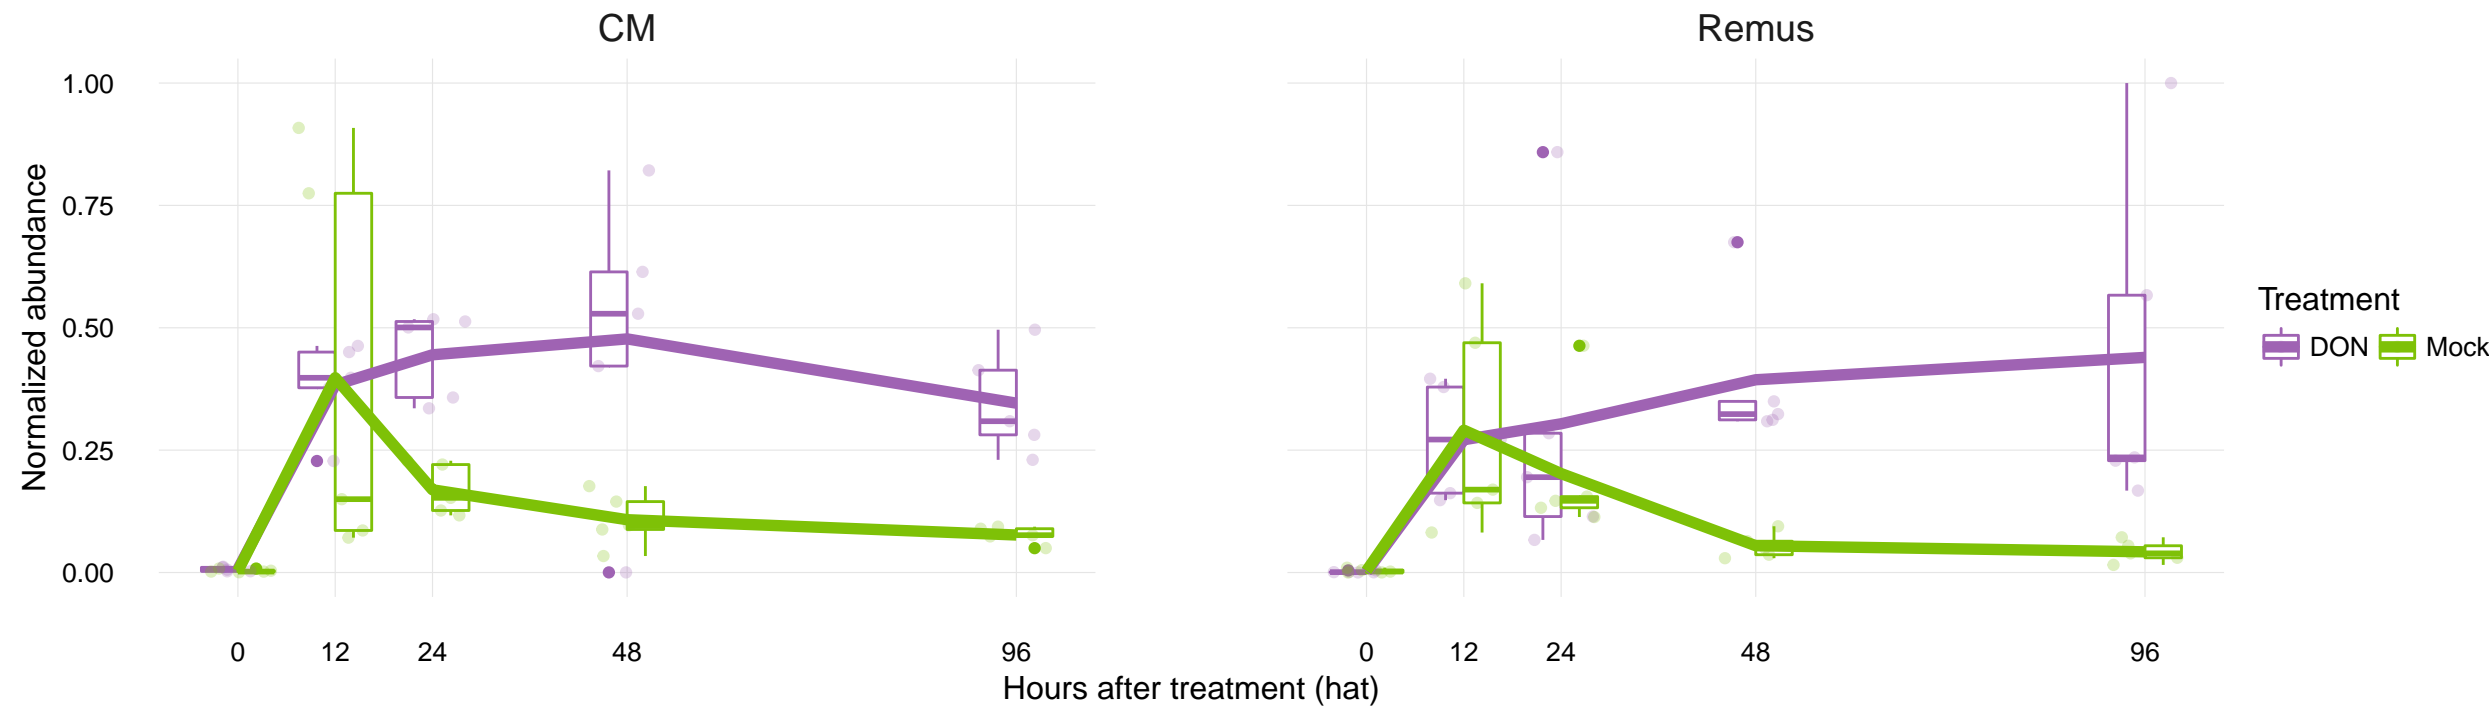

## DON, Mock; all four genotypes

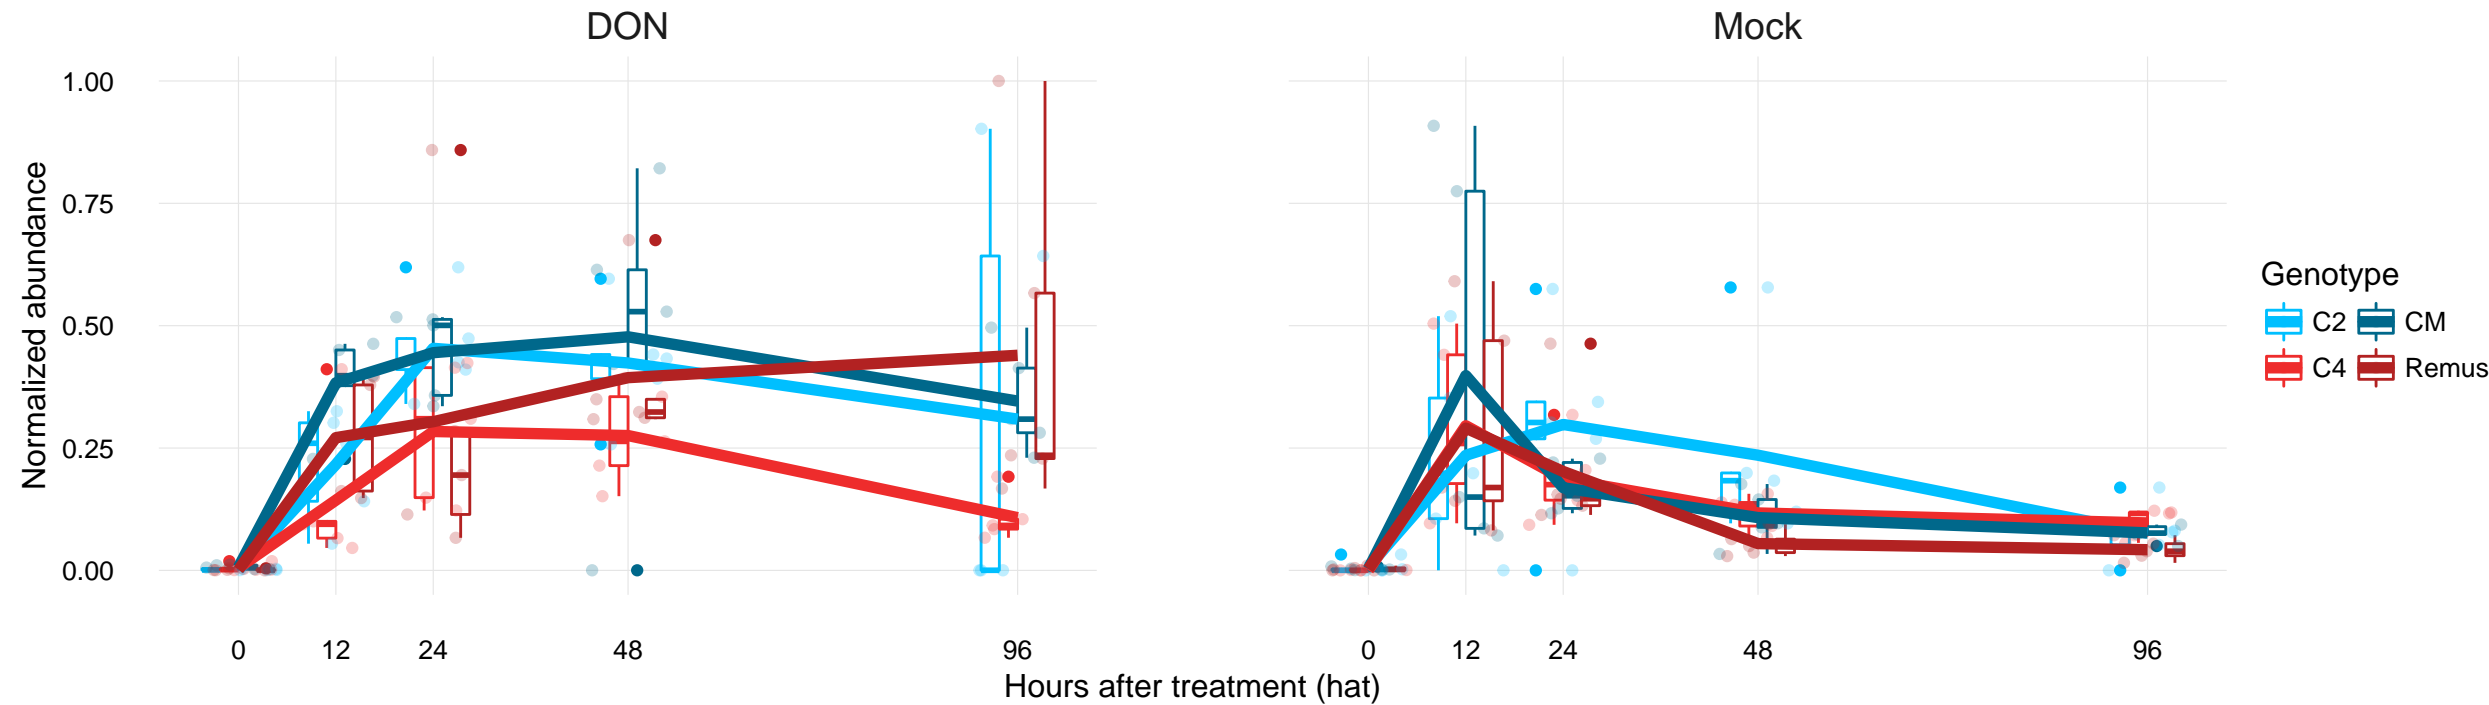

# A.124

Annotated as Flavonoid  
(30 database hits)

|                |                                                |
|----------------|------------------------------------------------|
| MZ             | 341.1385                                       |
| RT             | 20.25 min                                      |
| Normalization  | Indirectly via surrogate<br>in the KPX samples |
| Cluster        | –                                              |
| Cn total / Phe | 20 /                                           |

## C2, C4; different treatments

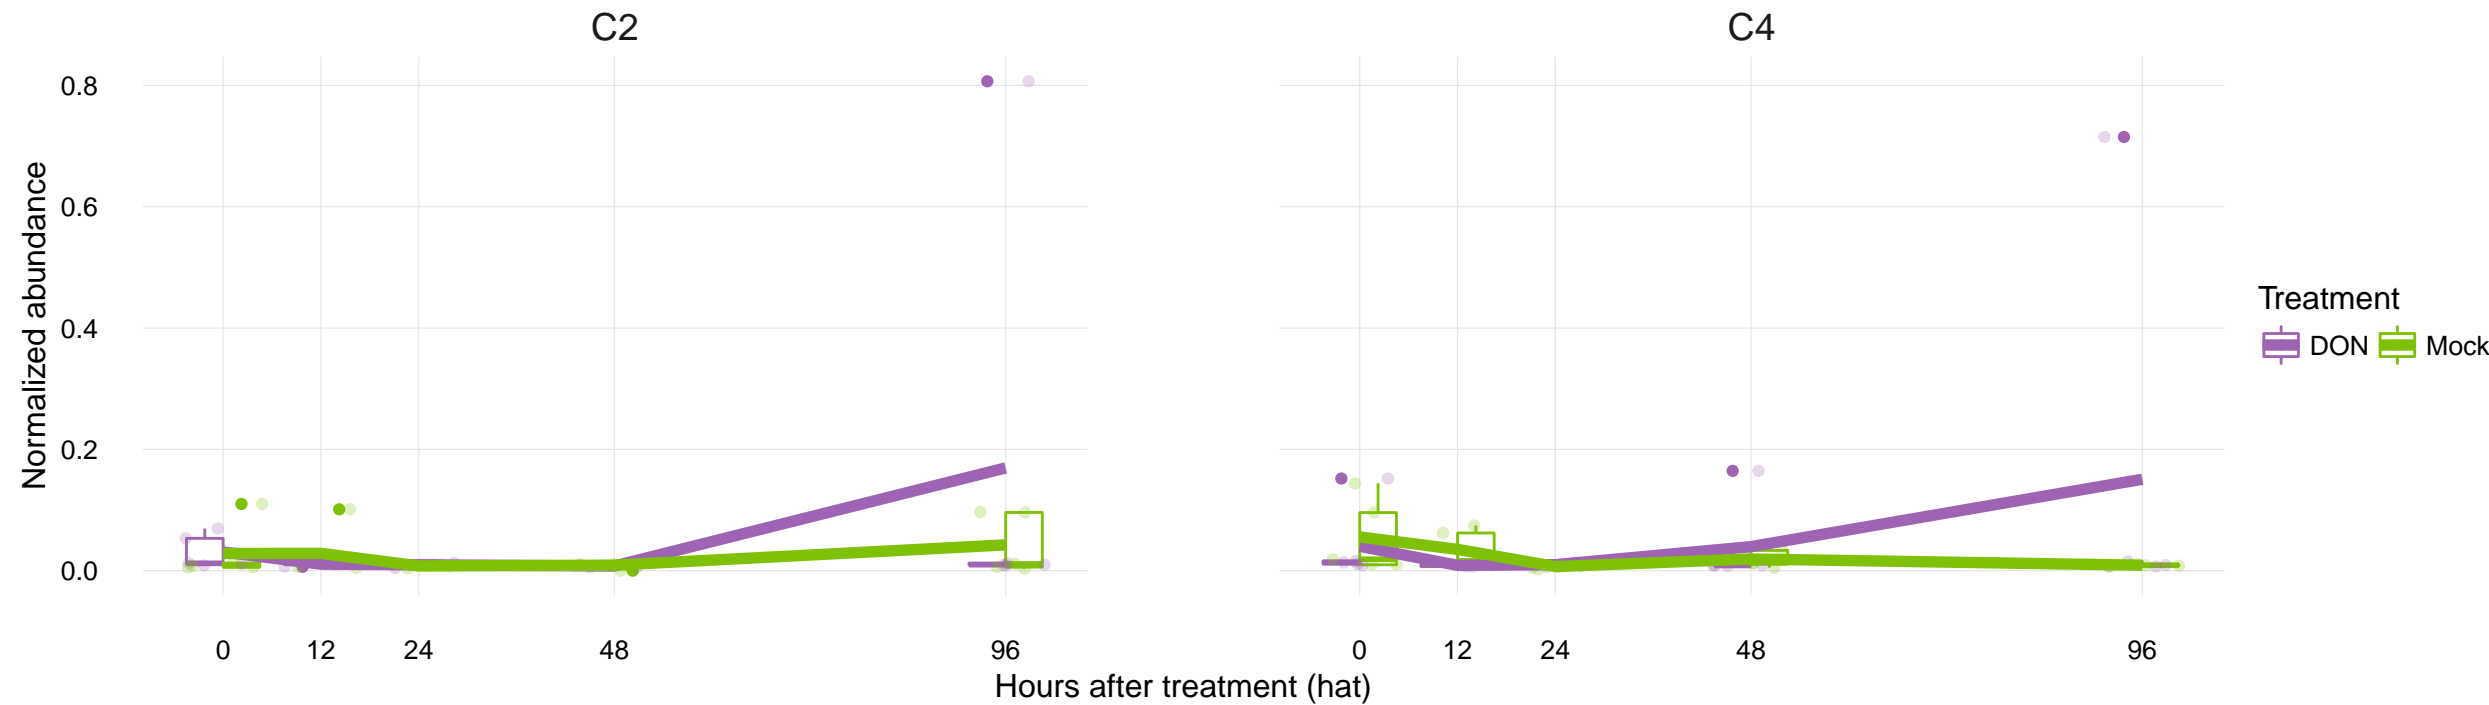

## DON, Mock; different genotypes

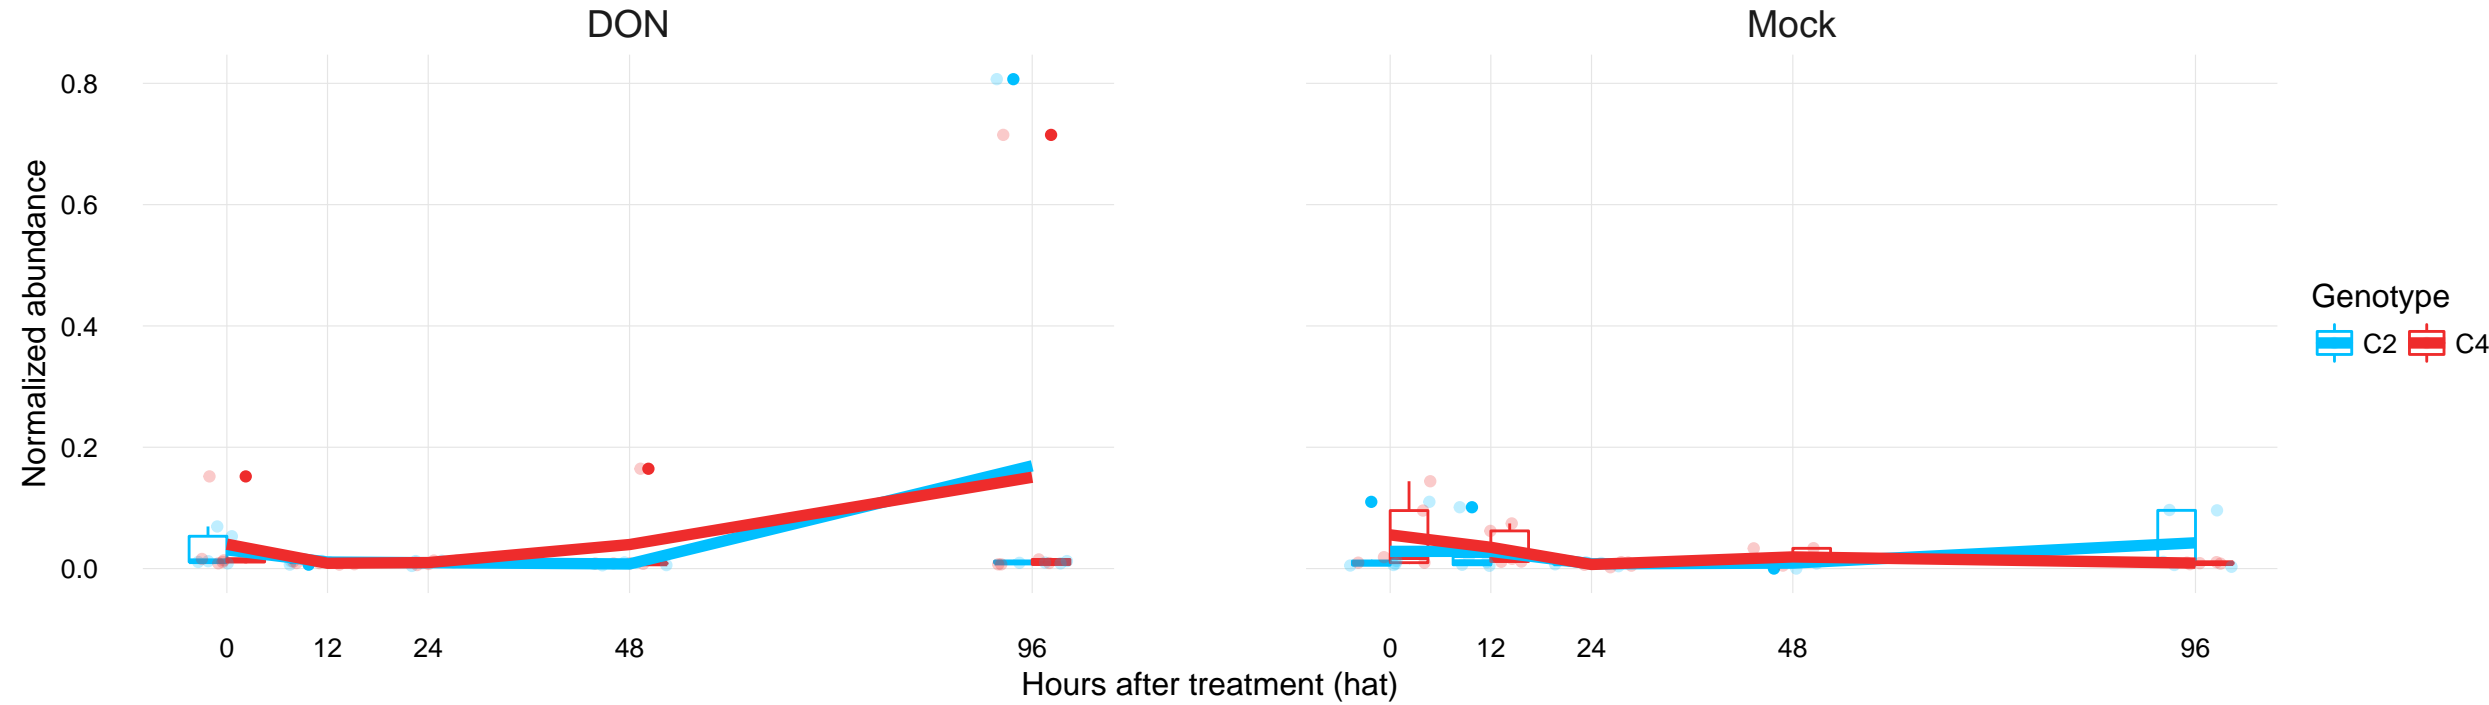

## CM, Remus; different treatments

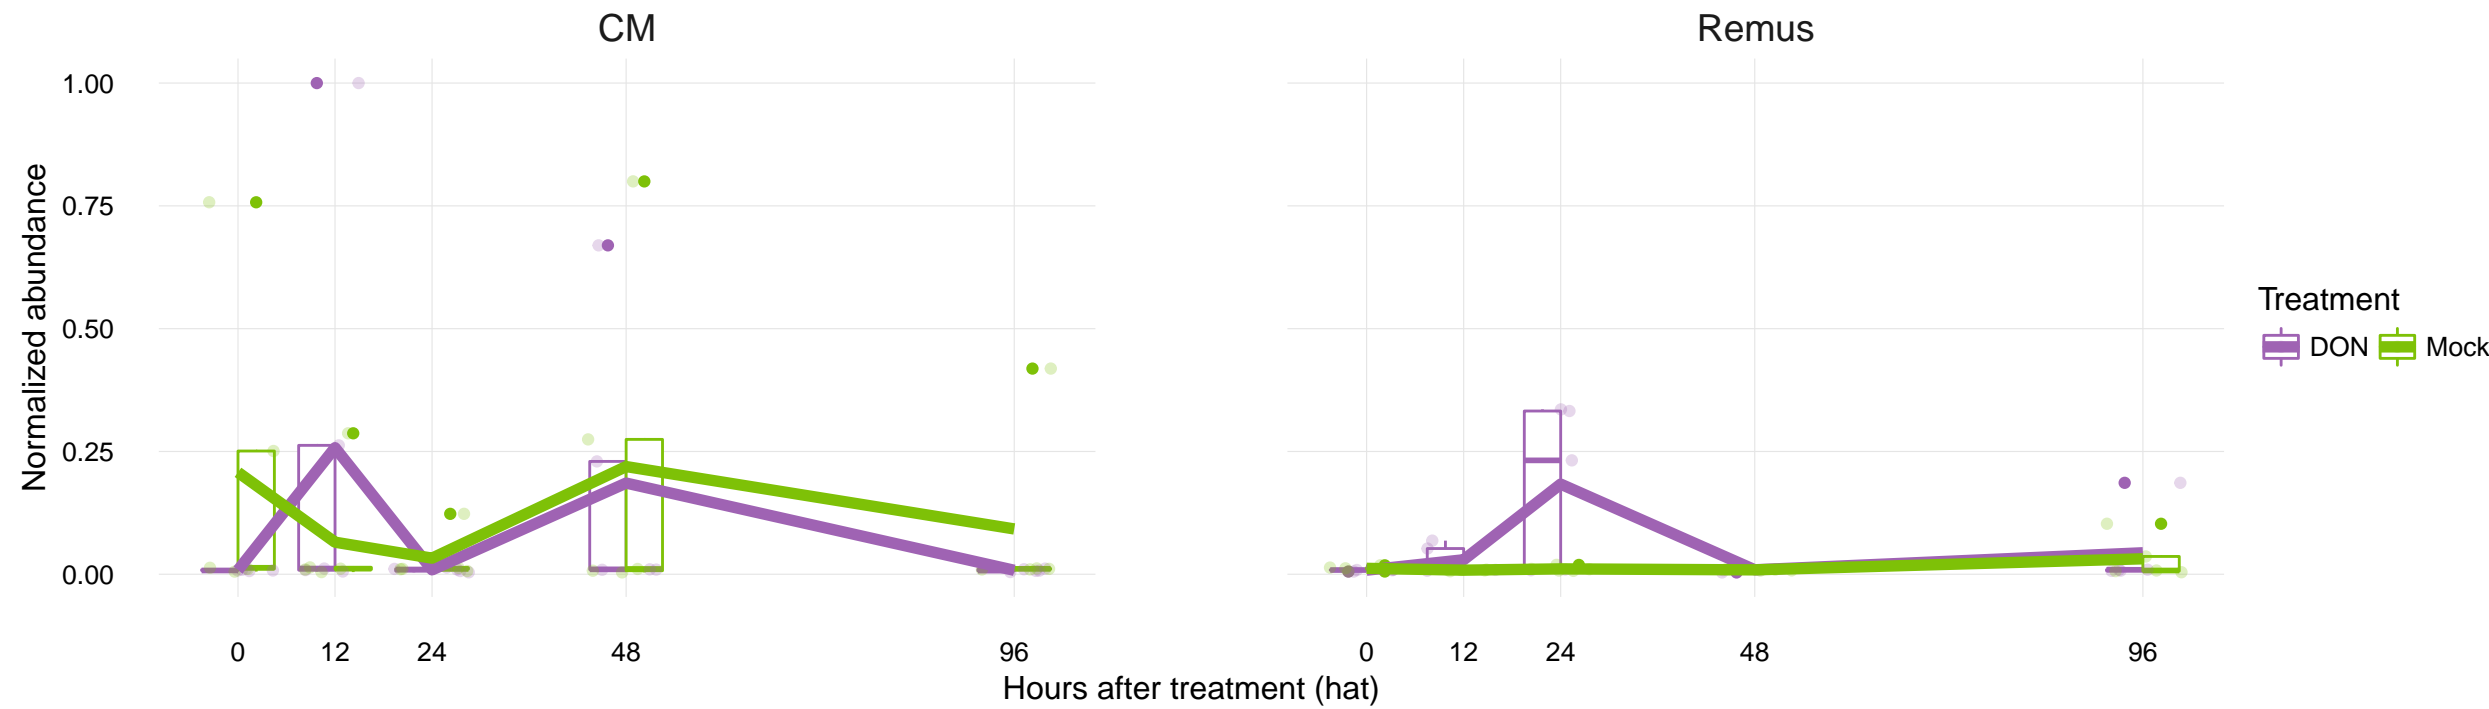

## DON, Mock; all four genotypes

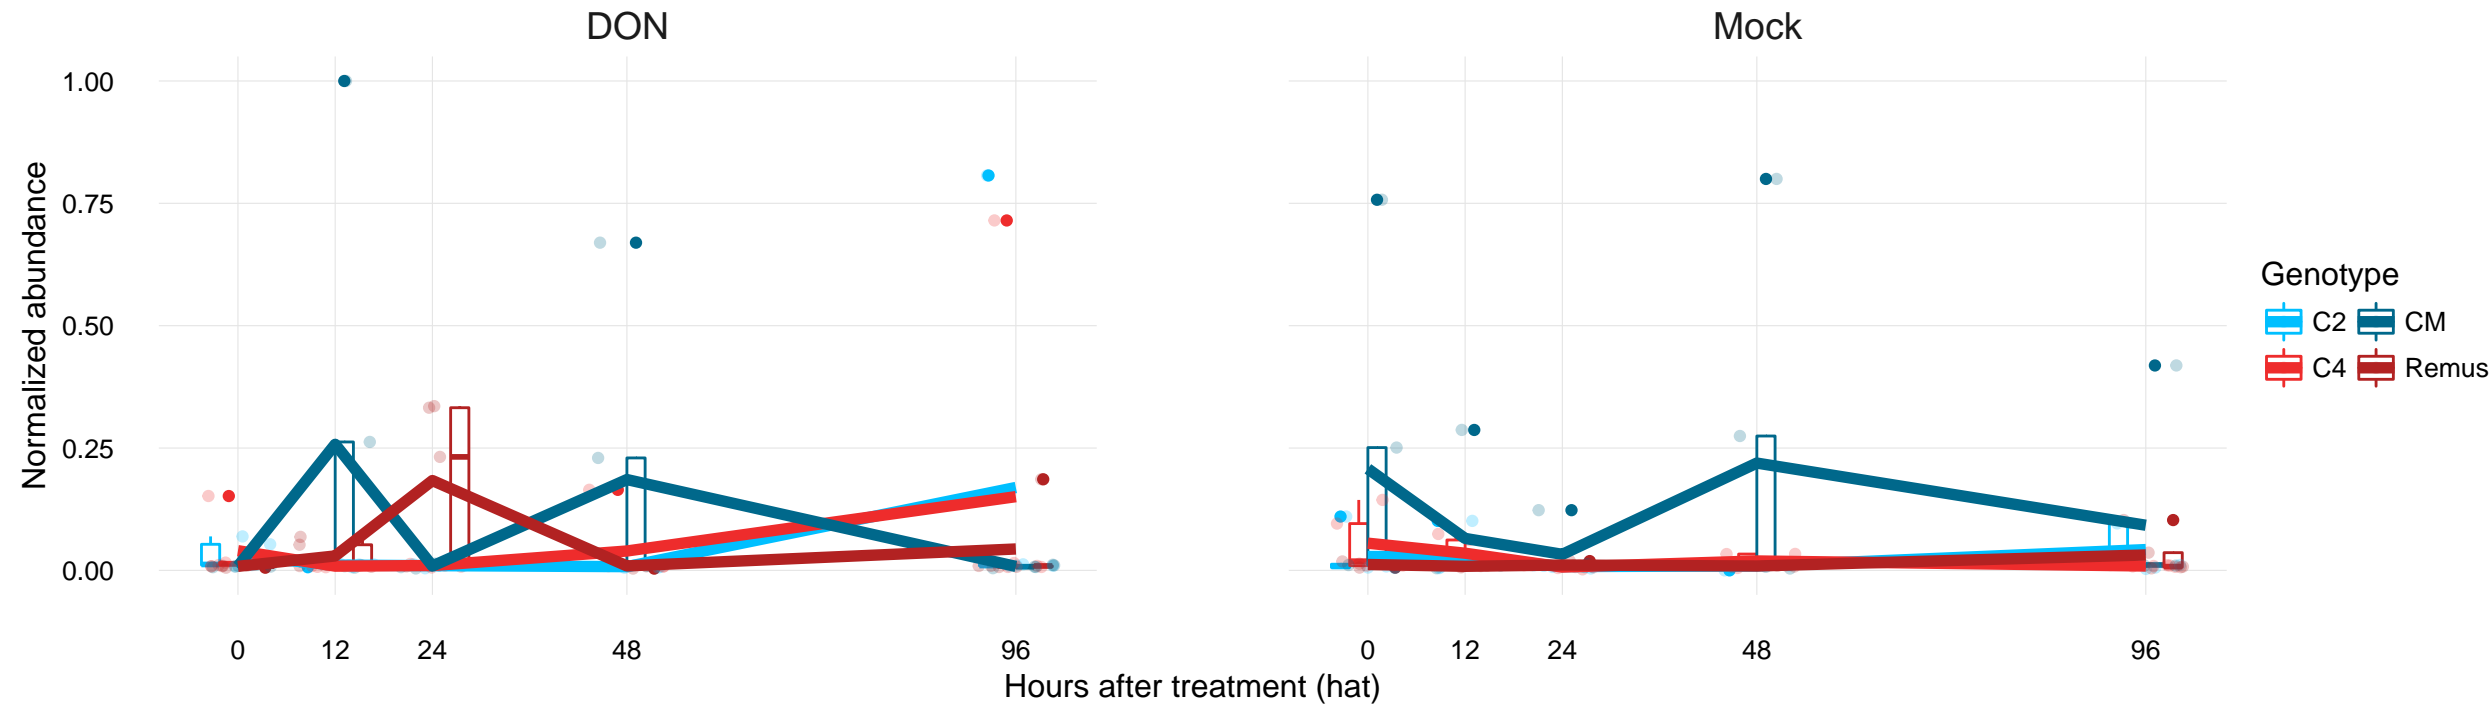

# A.19

Annotated as HCAA  
(1 database hit)

|                |                                                |
|----------------|------------------------------------------------|
| MZ             | 235.1447                                       |
| RT             | 7.48 min                                       |
| Normalization  | Indirectly via surrogate<br>in the KPX samples |
| Cluster        | –                                              |
| Cn total / Phe | 9 / 9                                          |

## C2, C4; different treatments

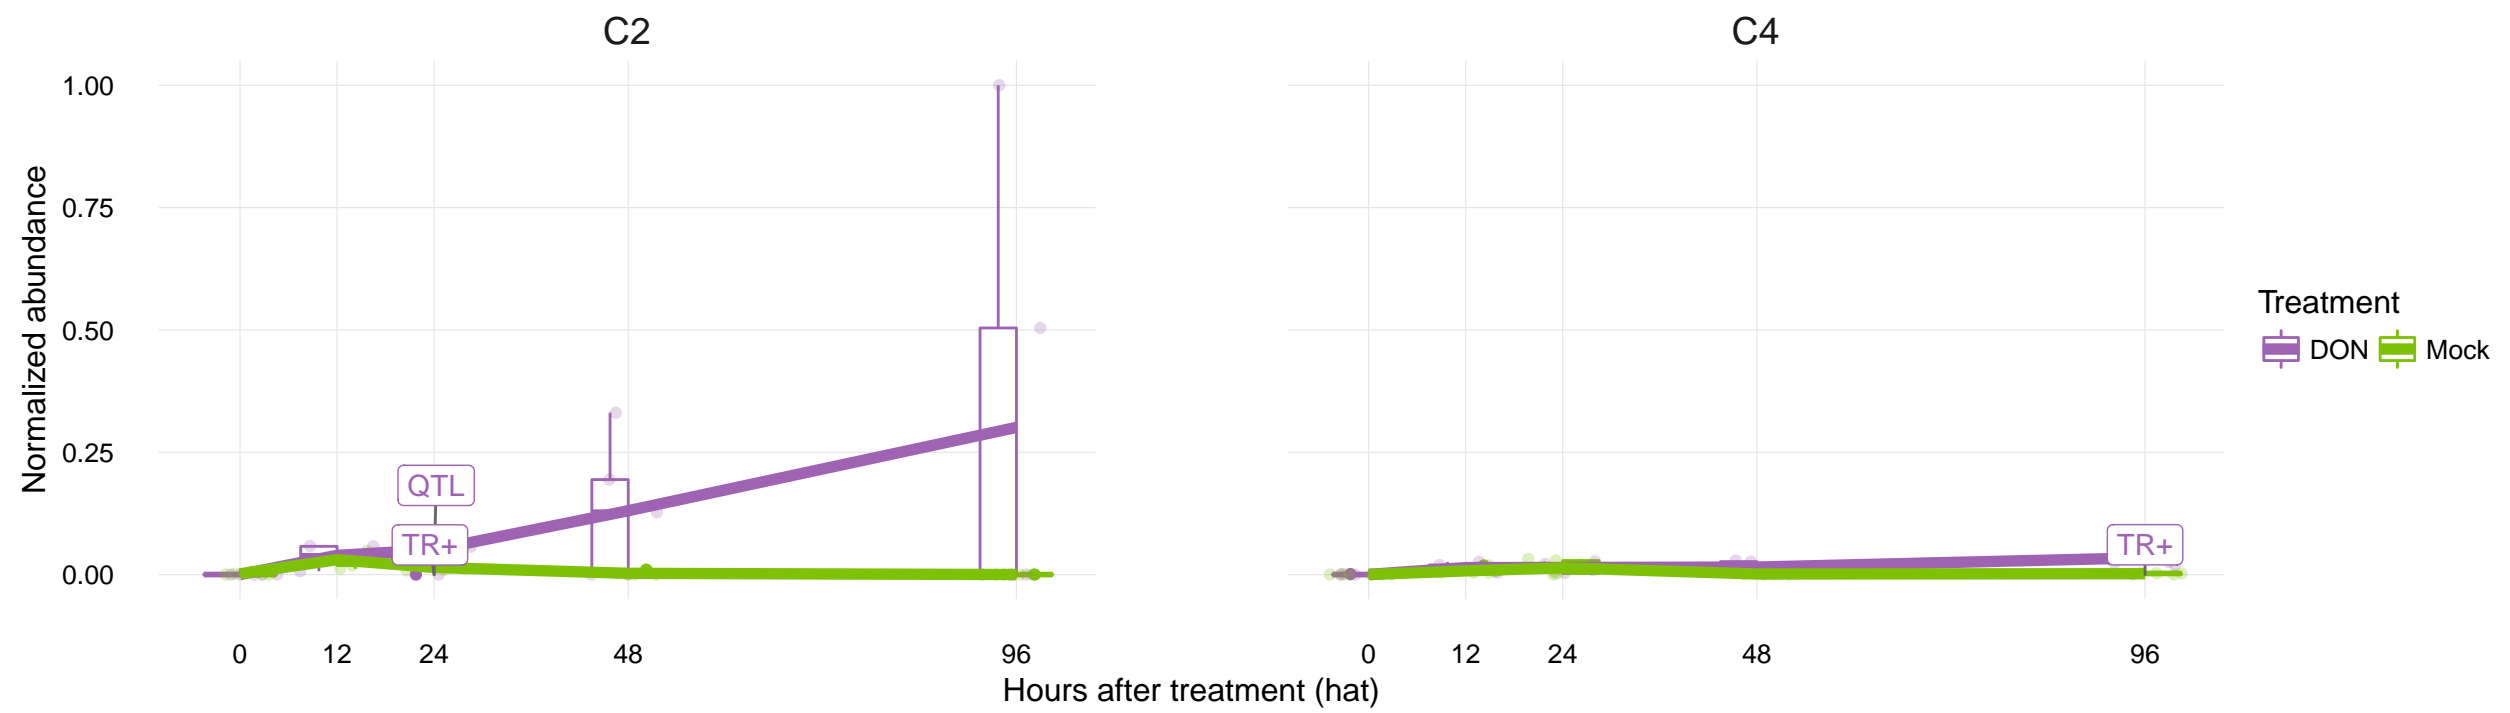

## DON, Mock; different genotypes

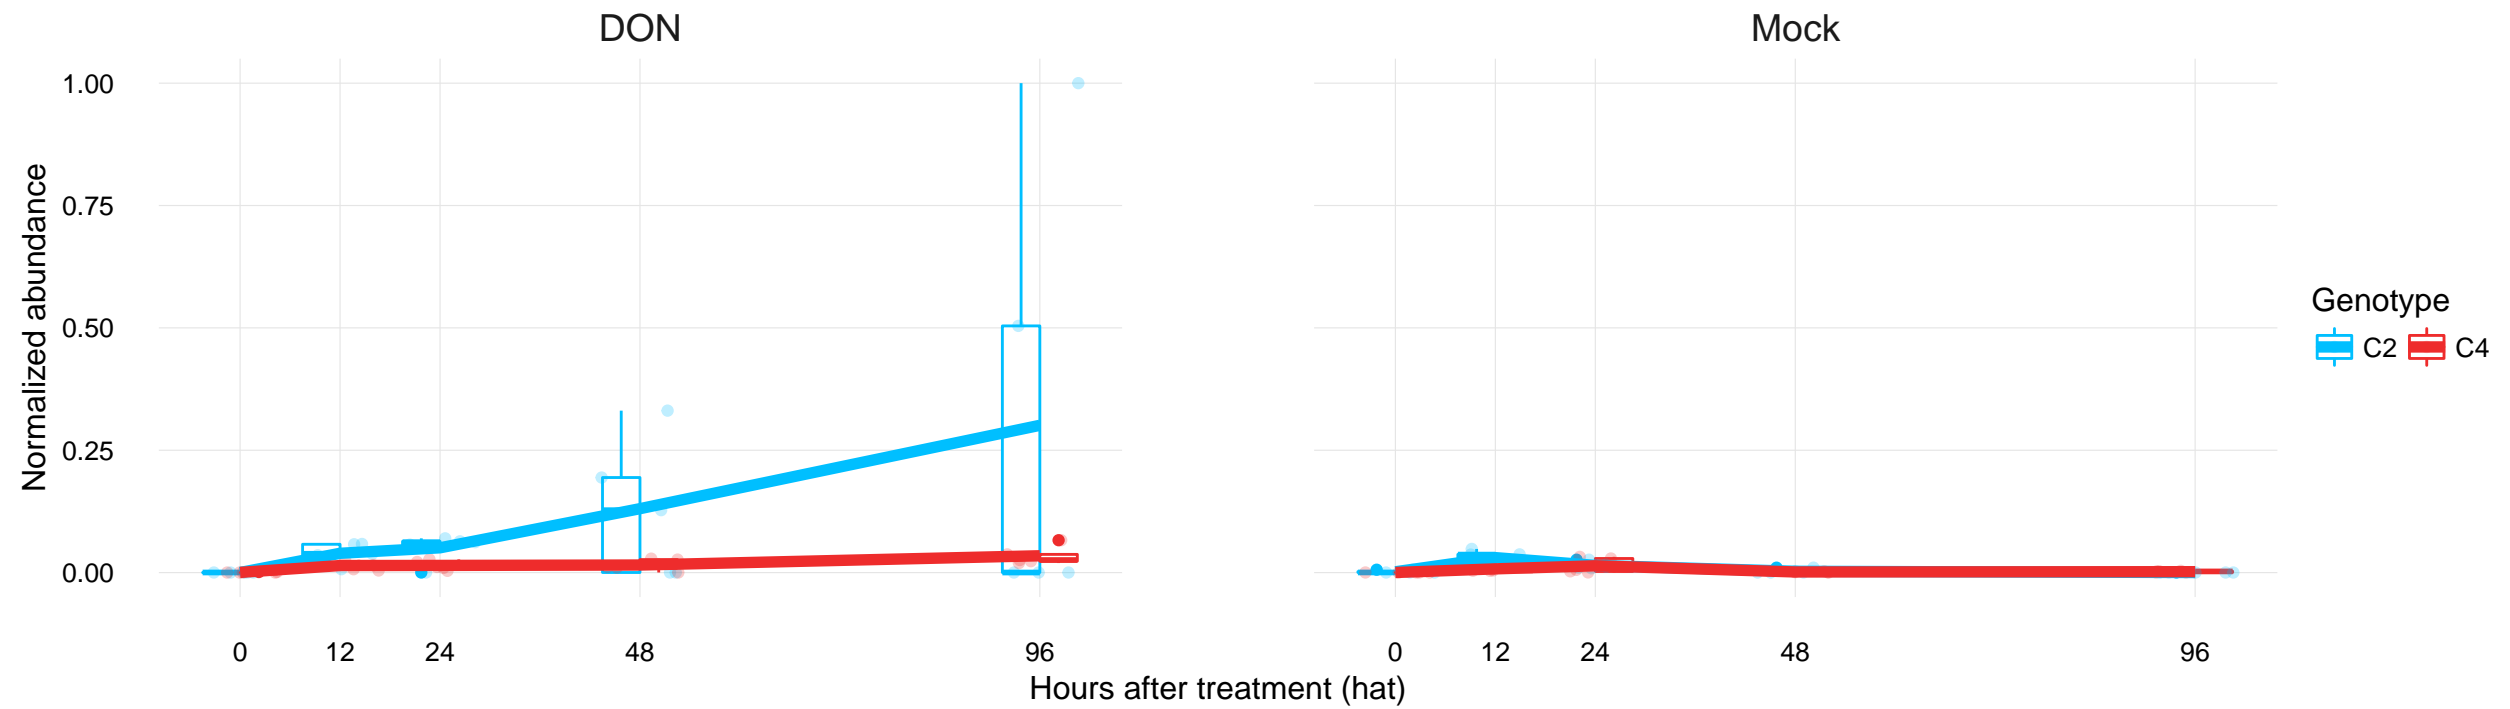

## CM, Remus; different treatments

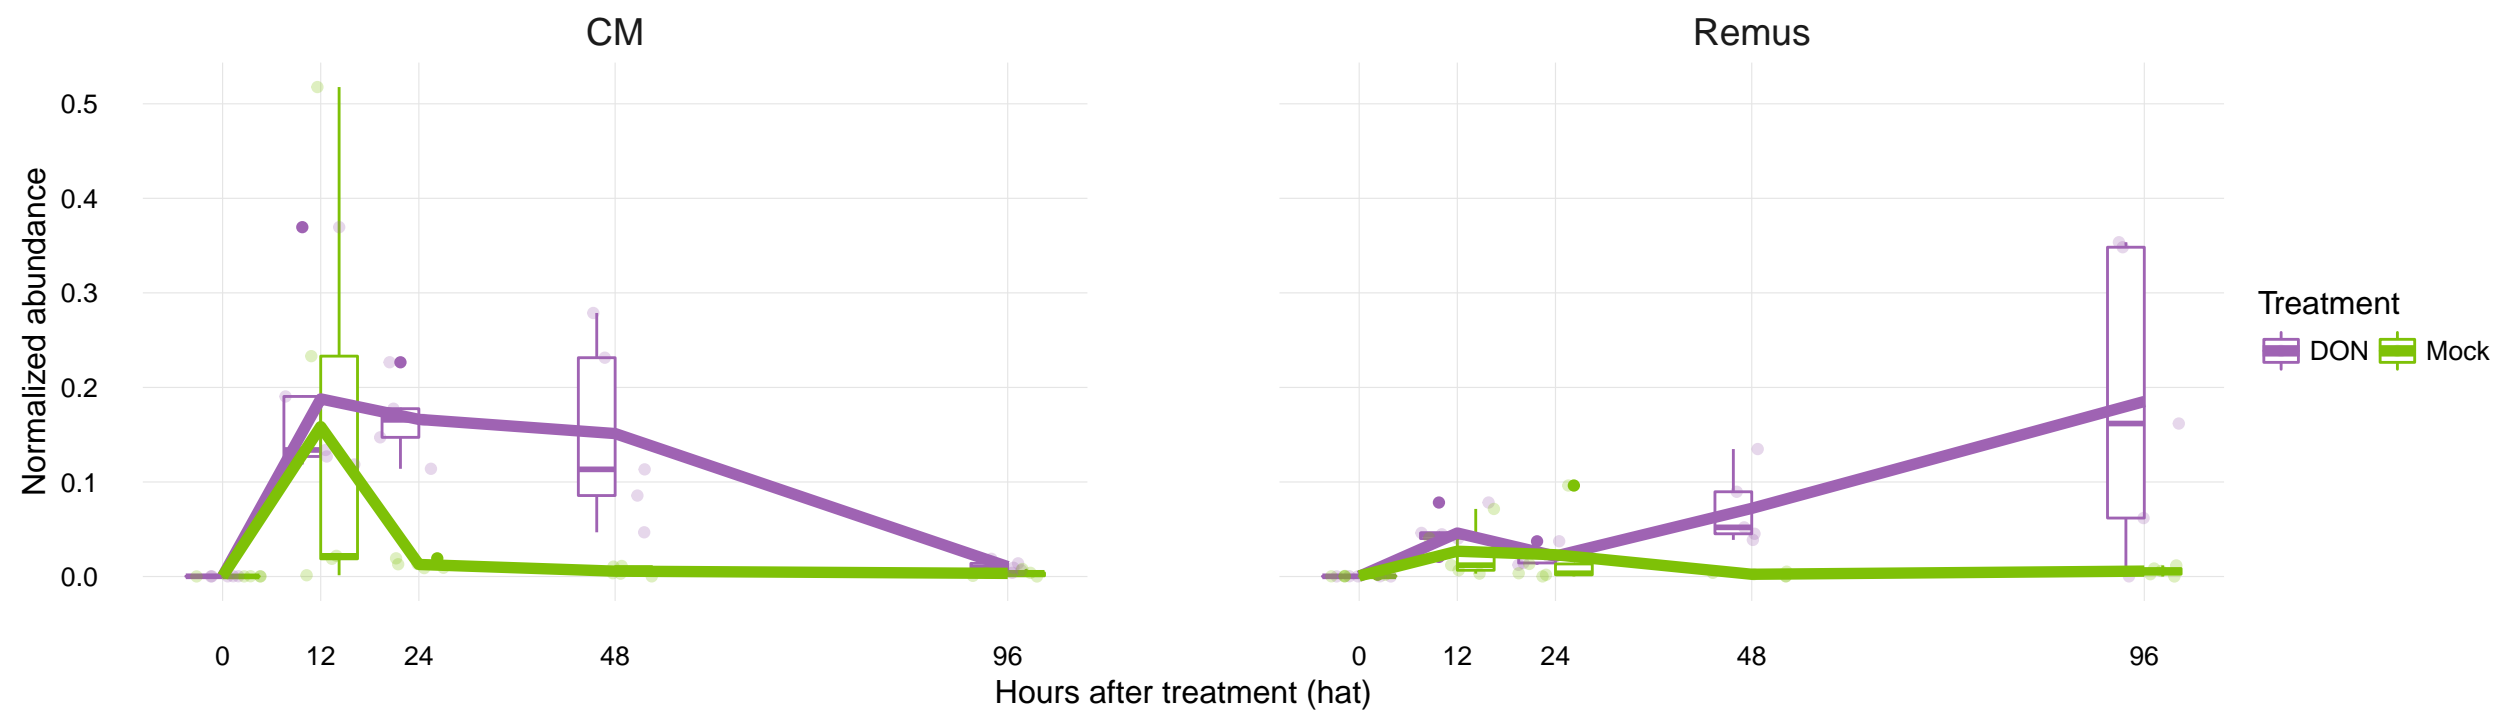

## DON, Mock; all four genotypes

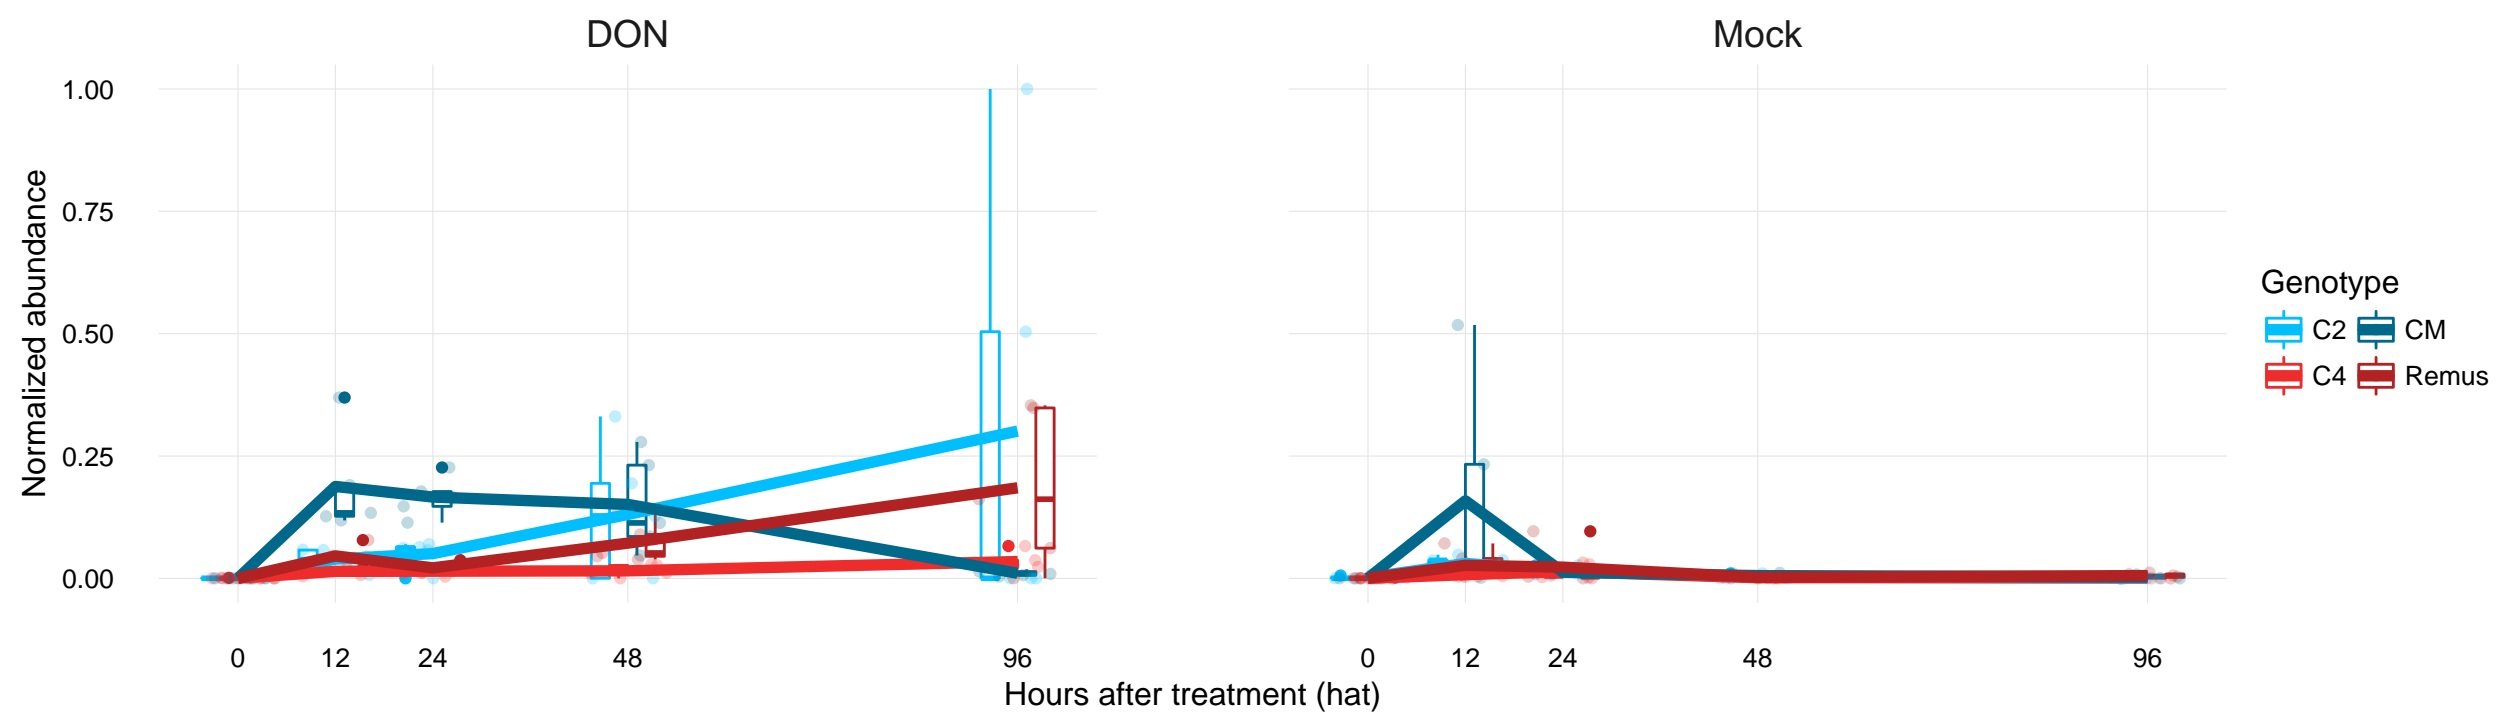

# A.140

Annotated as Flavonoid  
(43 database hits)

|                |                          |
|----------------|--------------------------|
| MZ             | 301.1073                 |
| RT             | 27.16 min                |
| Normalization  | Directly via KPX samples |
| Cluster        | –                        |
| Cn total / Phe | 17 /                     |

## C2, C4; different treatments

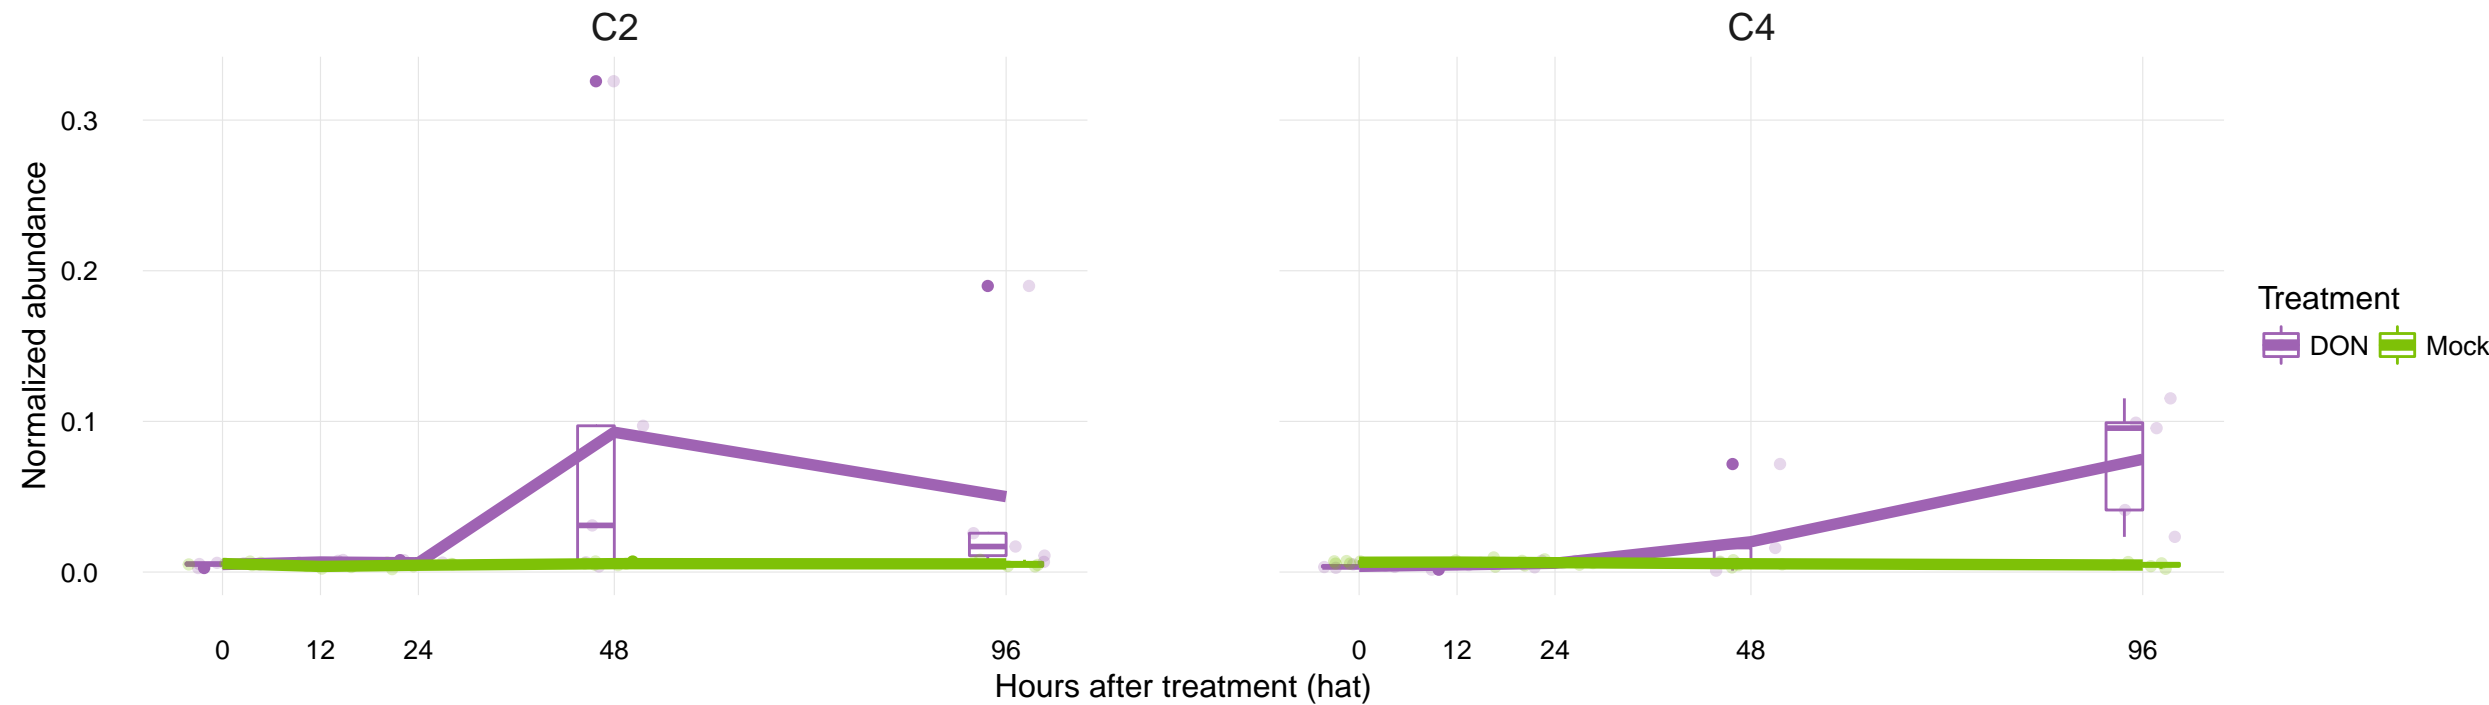

## DON, Mock; different genotypes

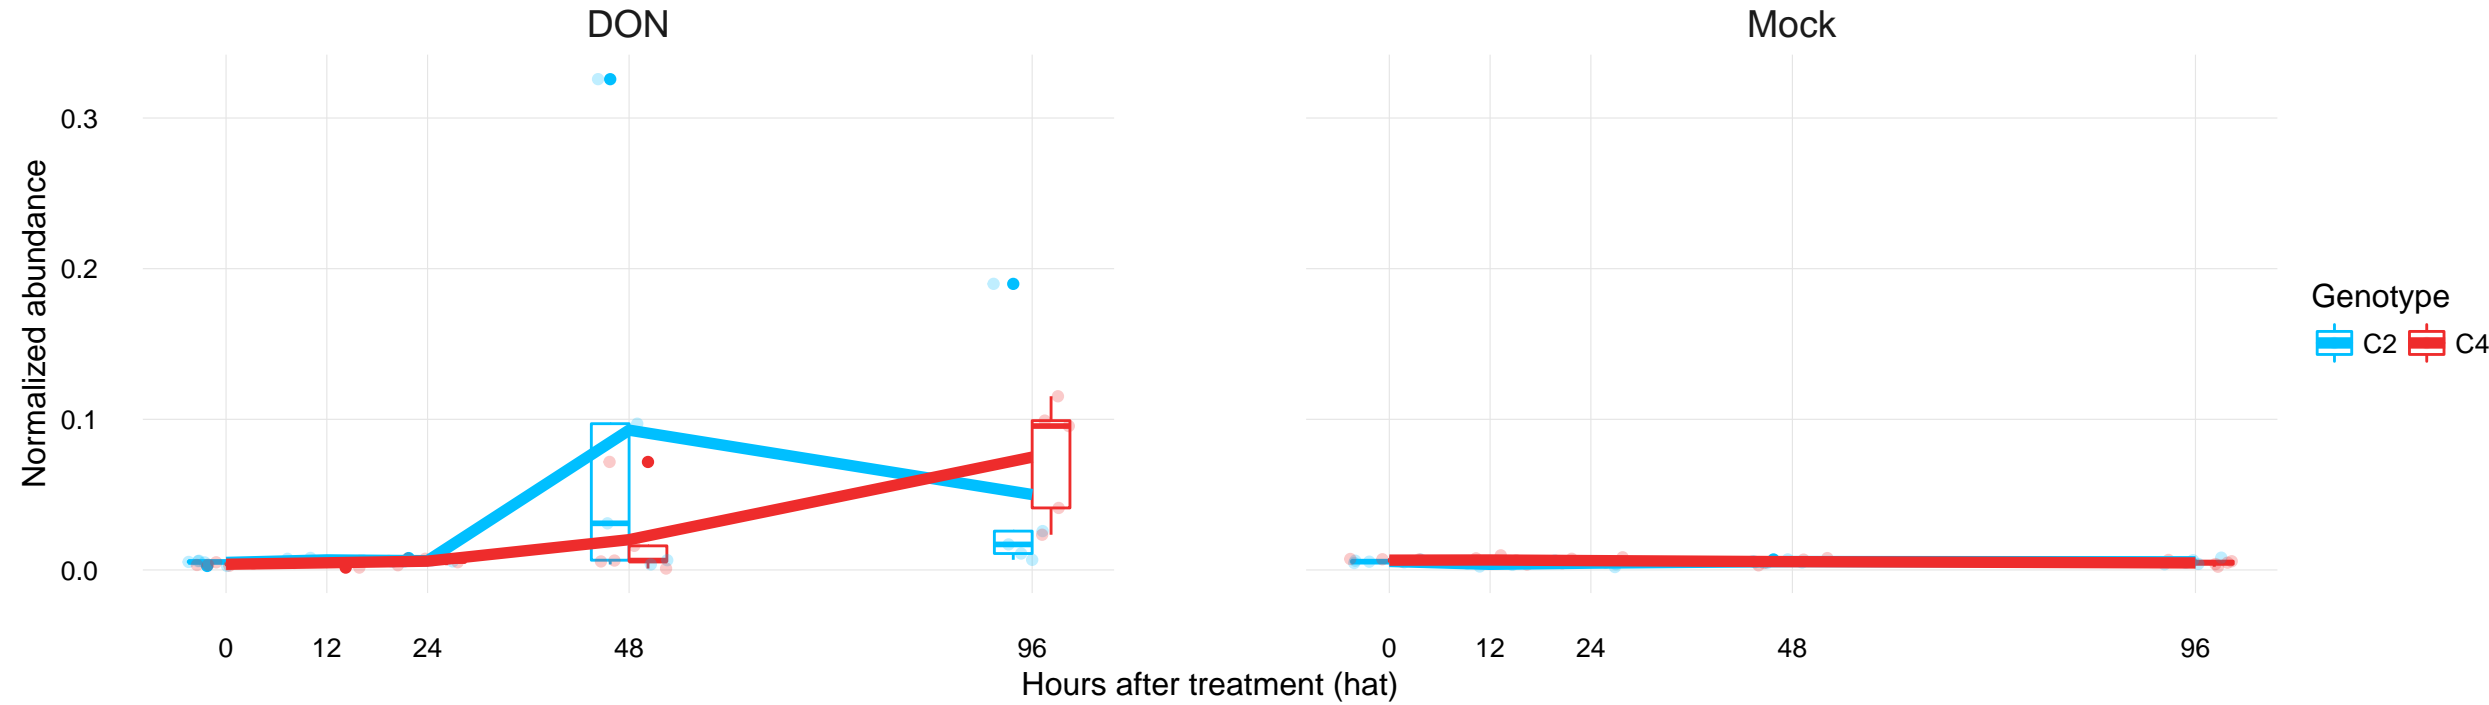

## CM, Remus; different treatments

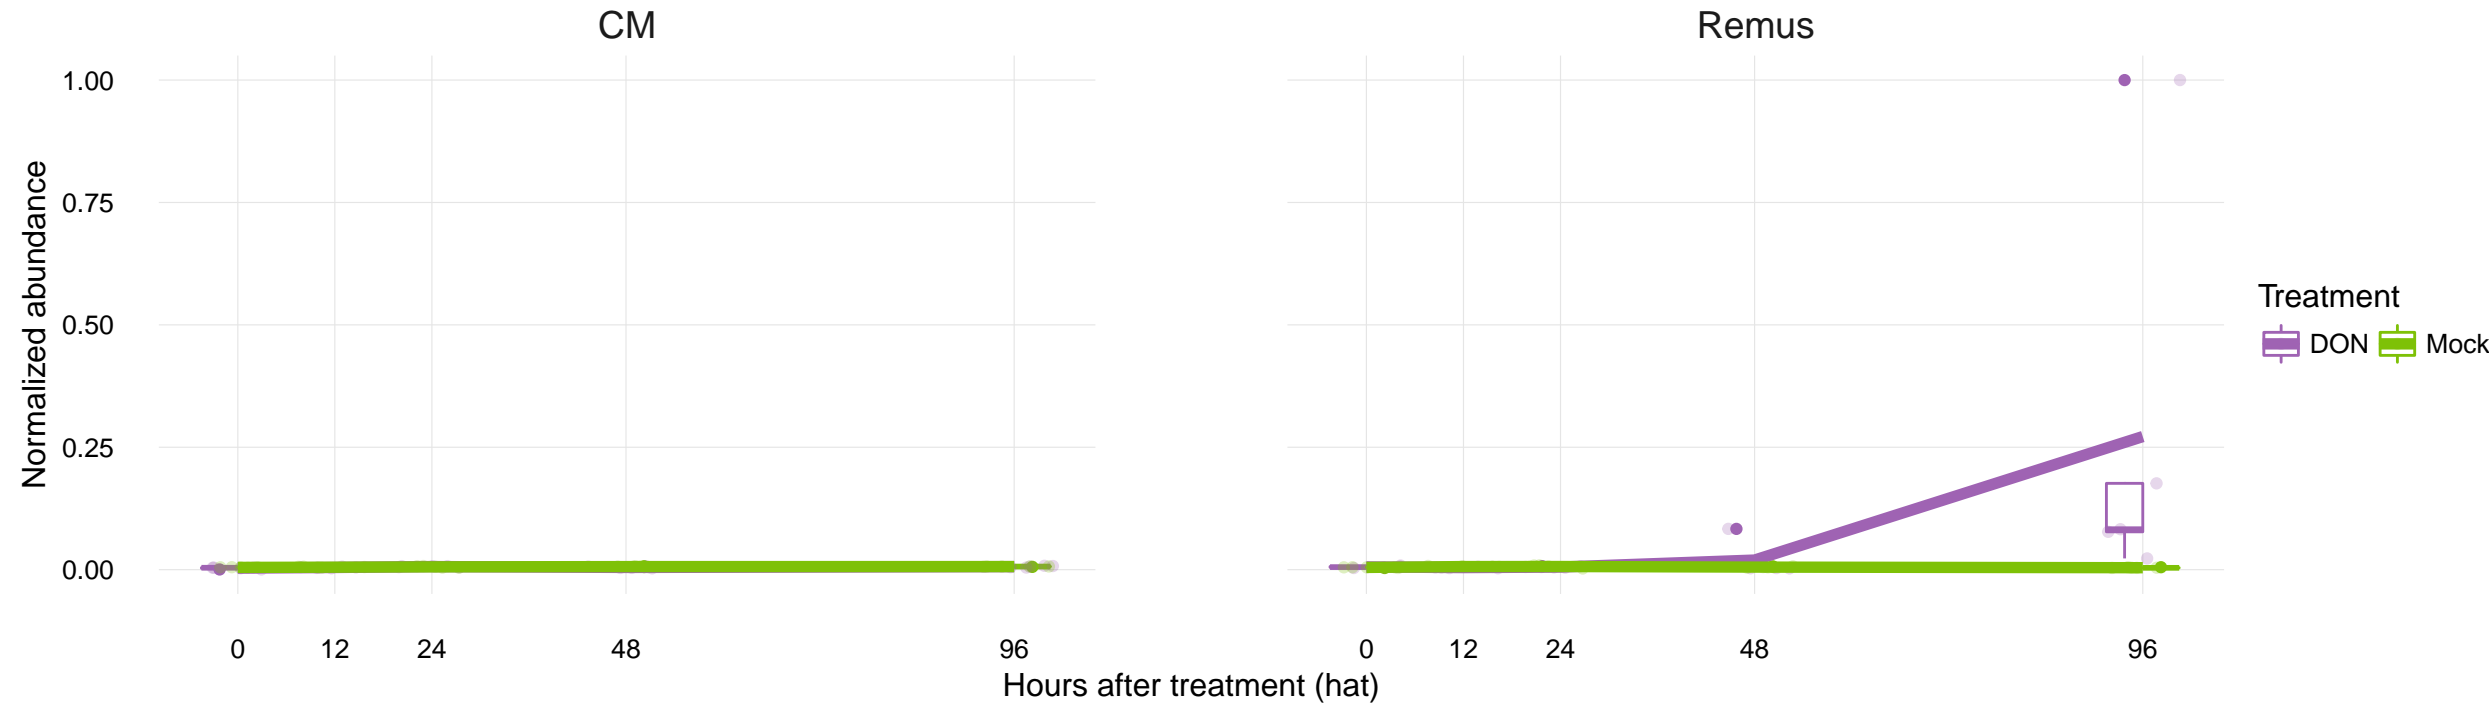

## DON, Mock; all four genotypes

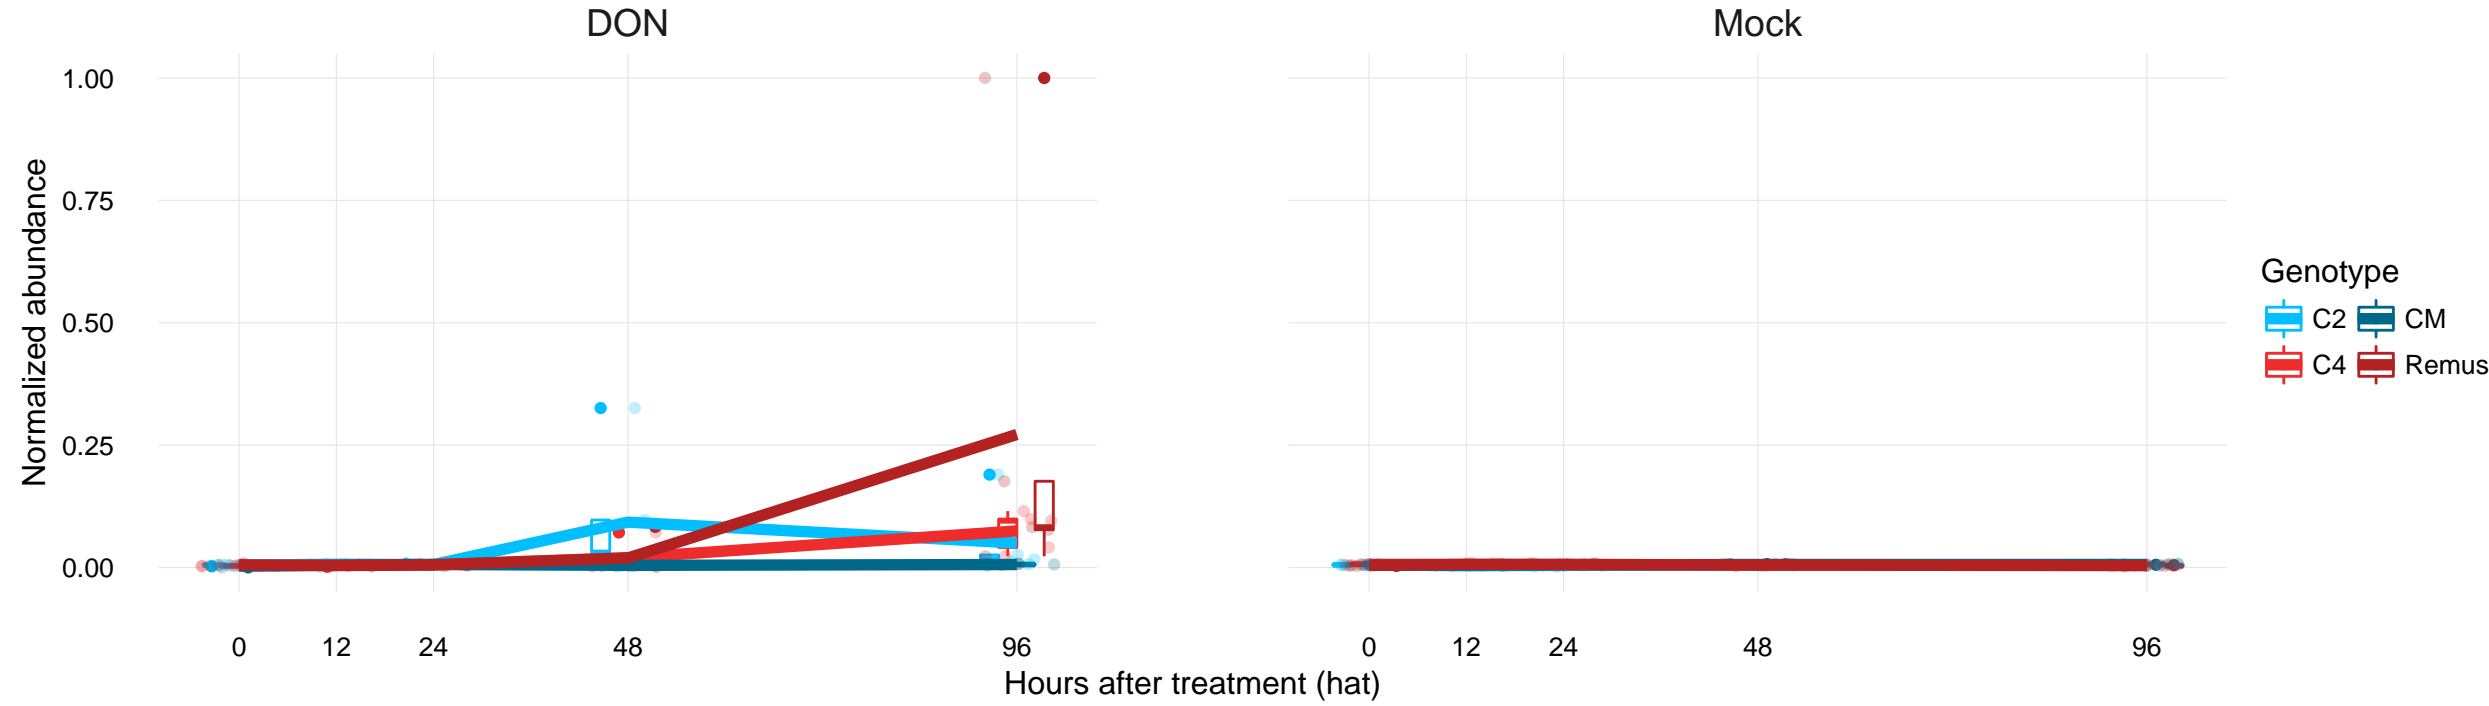

# A.103

Annotated as Flavonoid, Lignan or HCA derivative  
(15 database hits)

|                |                                                |
|----------------|------------------------------------------------|
| MZ             | 359.1491                                       |
| RT             | 16.85 min                                      |
| Normalization  | Indirectly via surrogate<br>in the KPX samples |
| Cluster        | —                                              |
| Cn total / Phe | 20 / 9                                         |

## C2, C4; different treatments

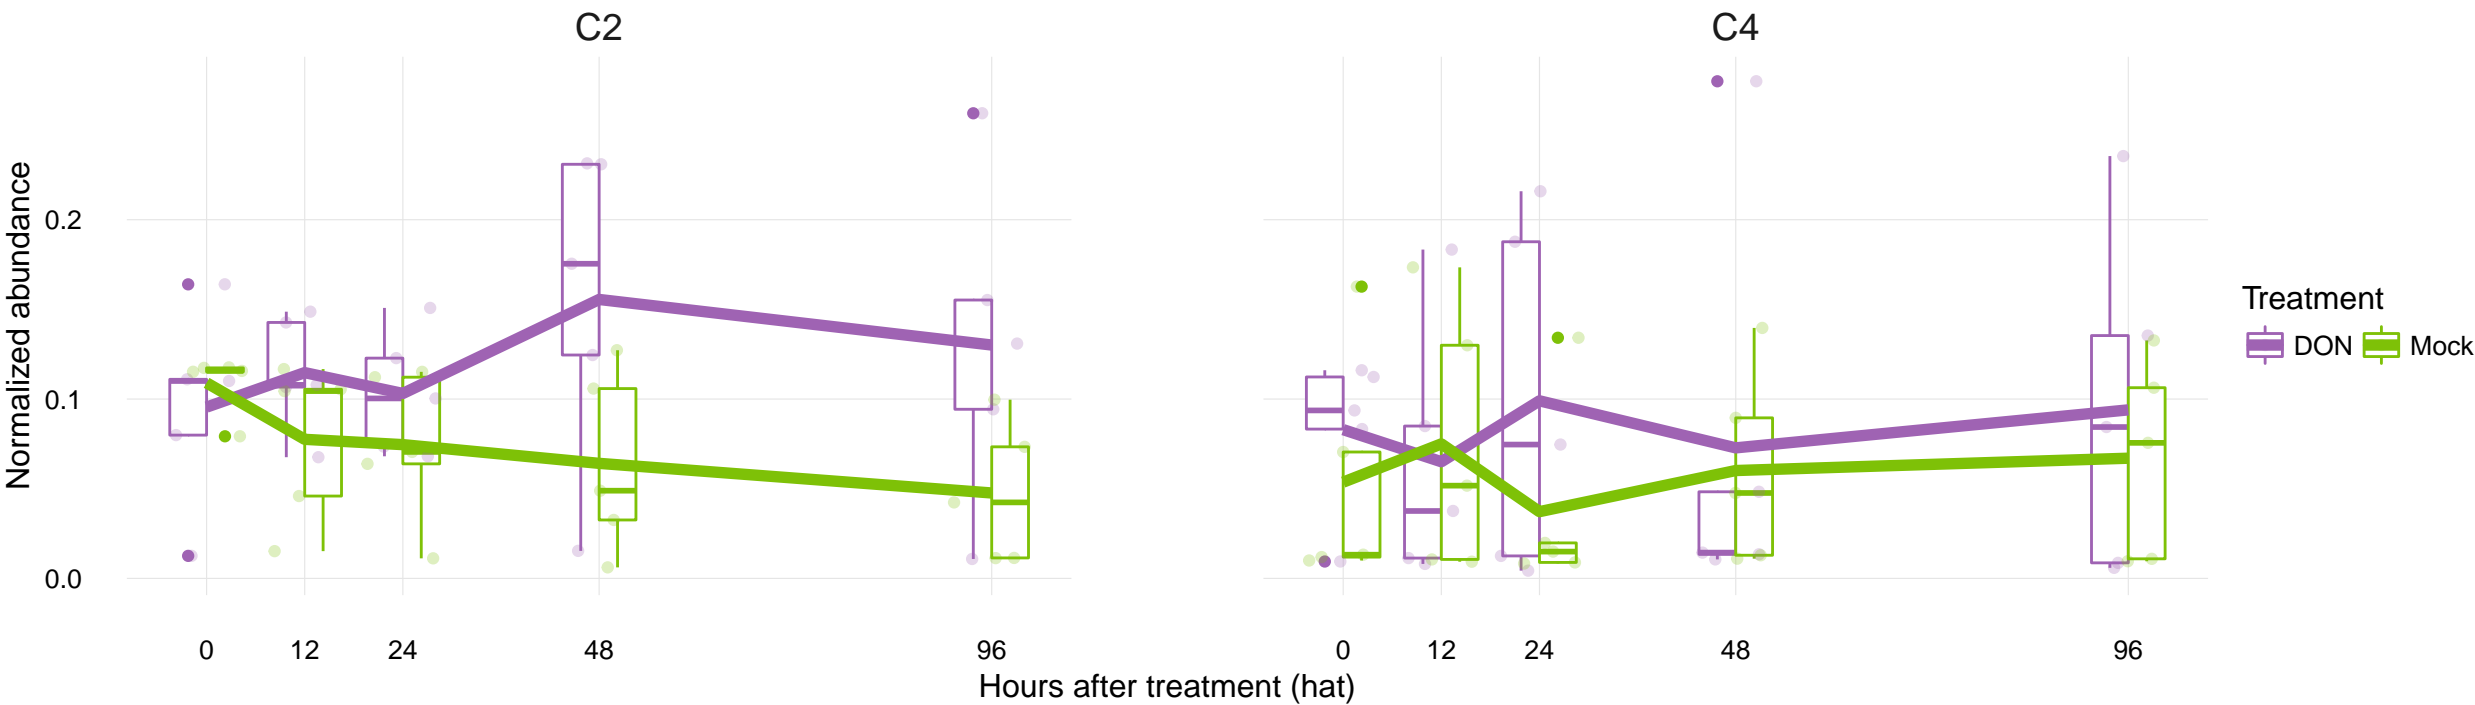

## DON, Mock; different genotypes

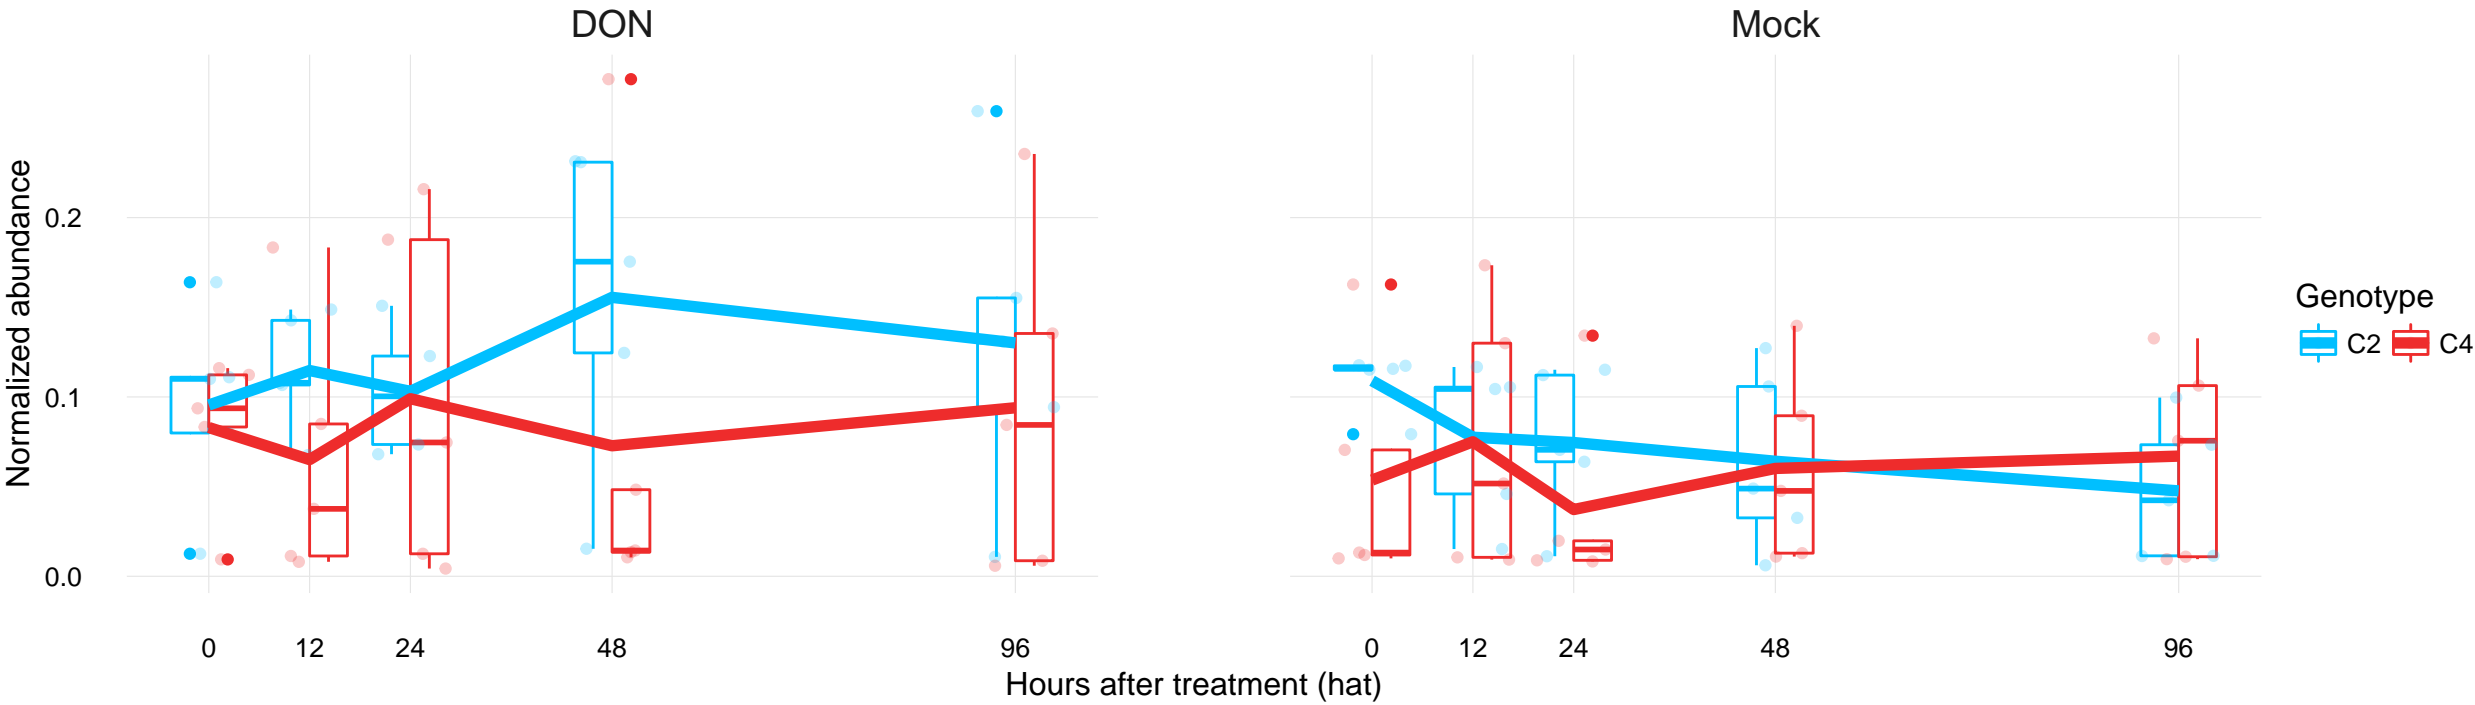

## CM, Remus; different treatments

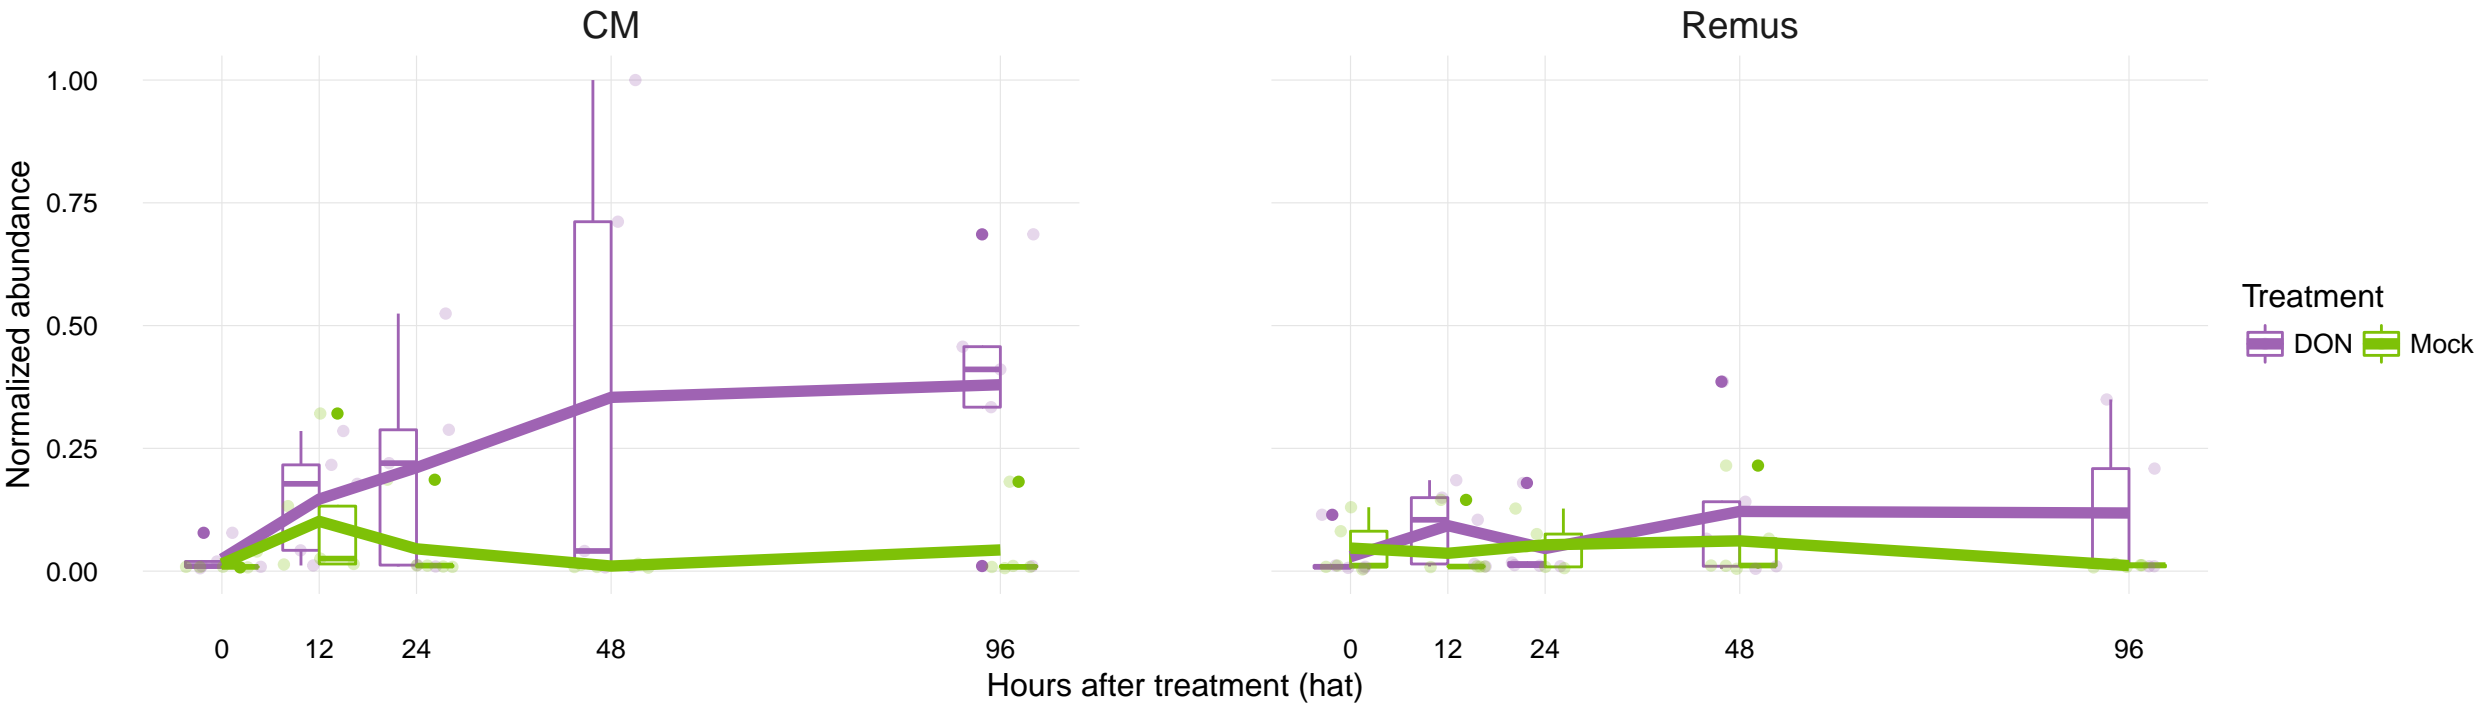

## DON, Mock; all four genotypes

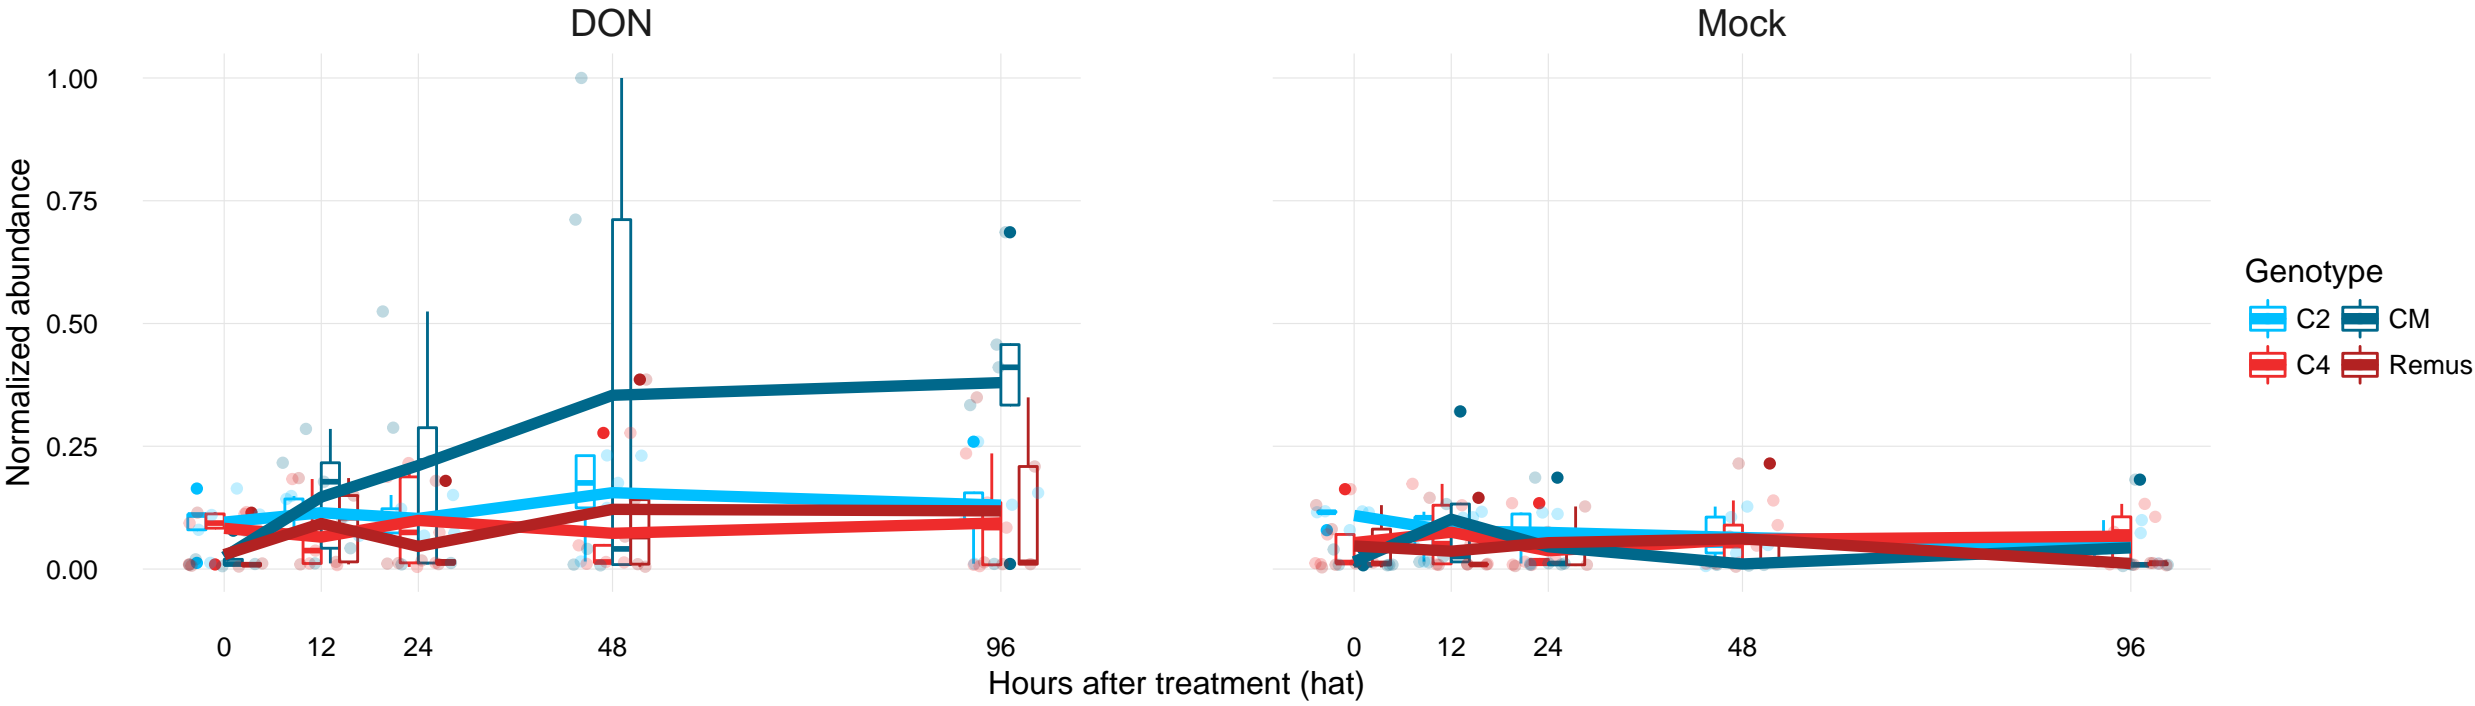

# A.18

Annotated as others  
(1 database hit)

|                |                                                |
|----------------|------------------------------------------------|
| MZ             | 153.0545                                       |
| RT             | 7.3 min                                        |
| Normalization  | Indirectly via surrogate<br>in the KPX samples |
| Cluster        | —                                              |
| Cn total / Phe | 8 /                                            |

## C2, C4; different treatments

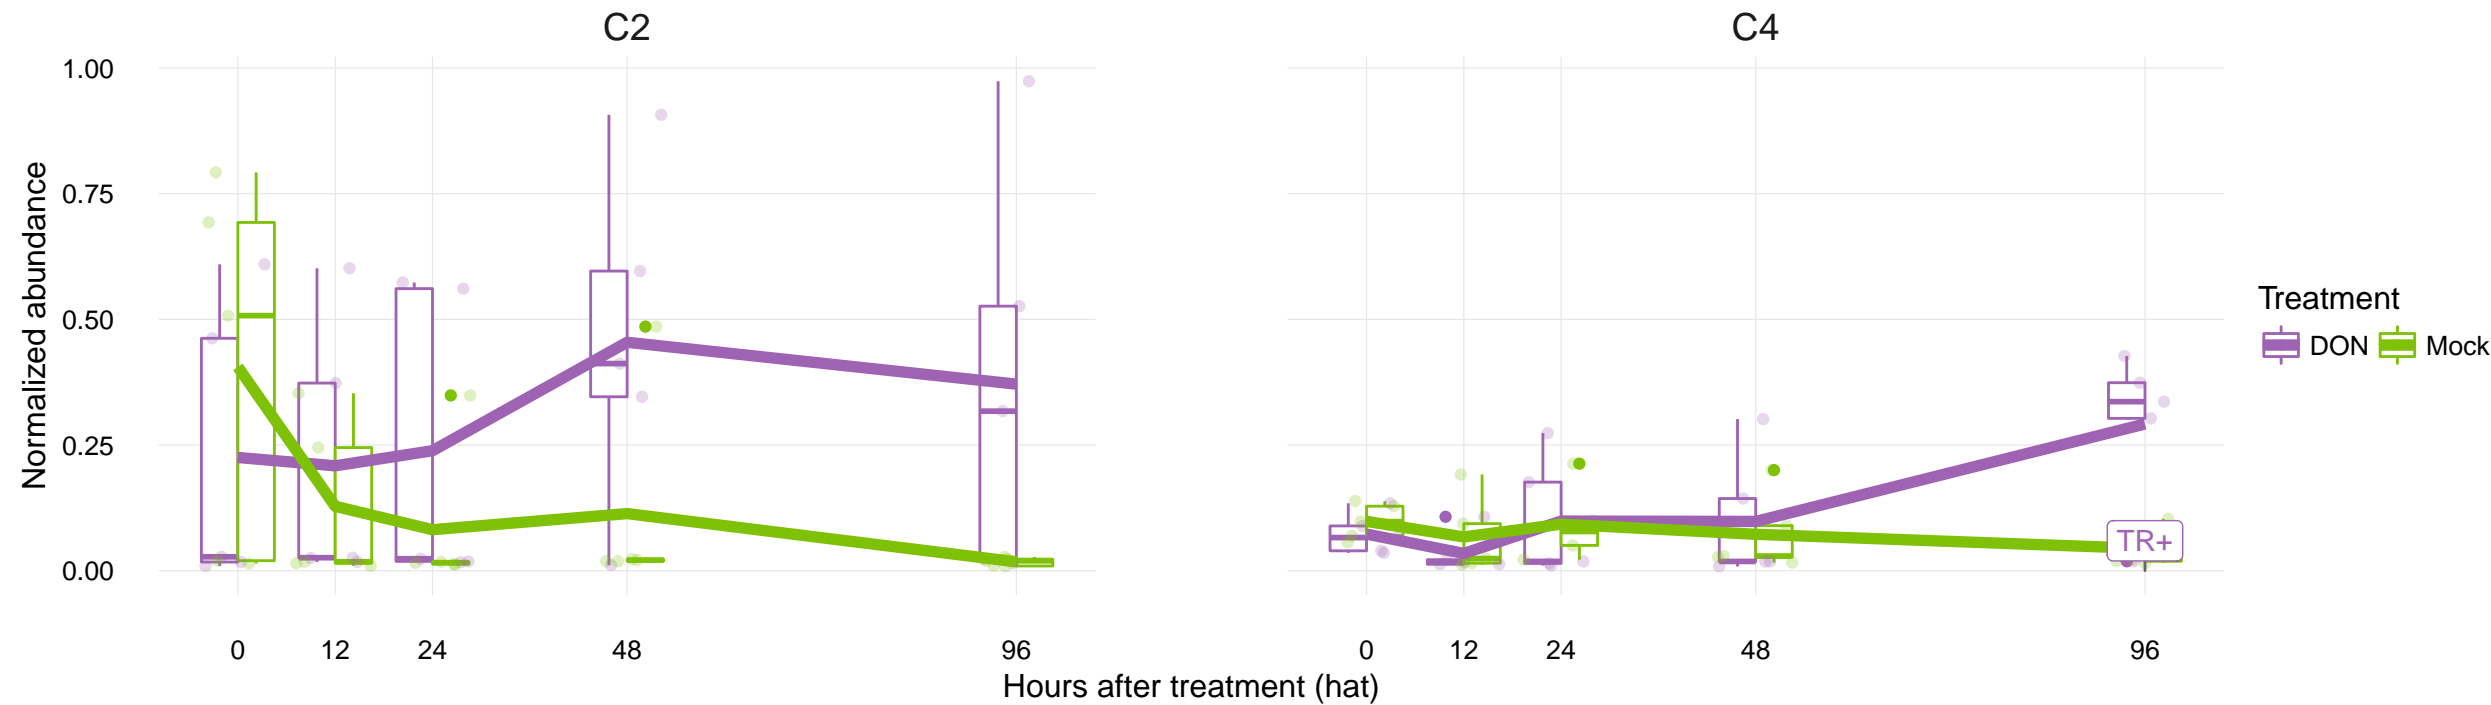

## DON, Mock; different genotypes

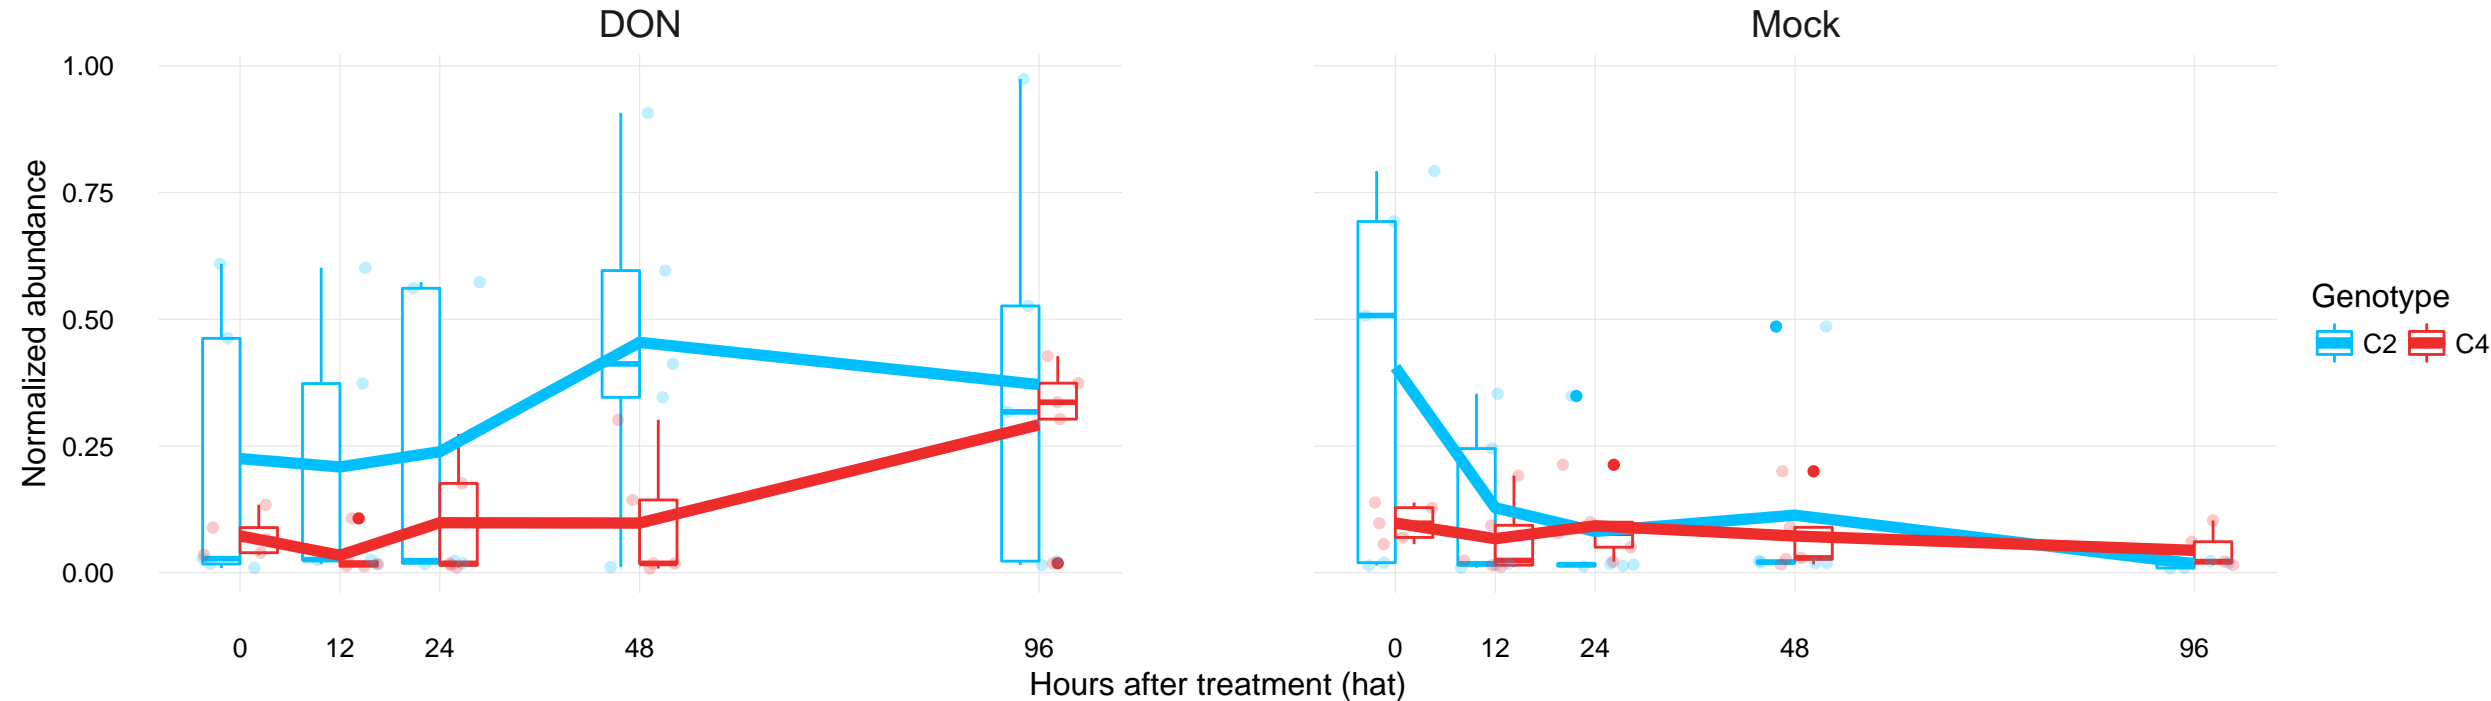

## CM, Remus; different treatments

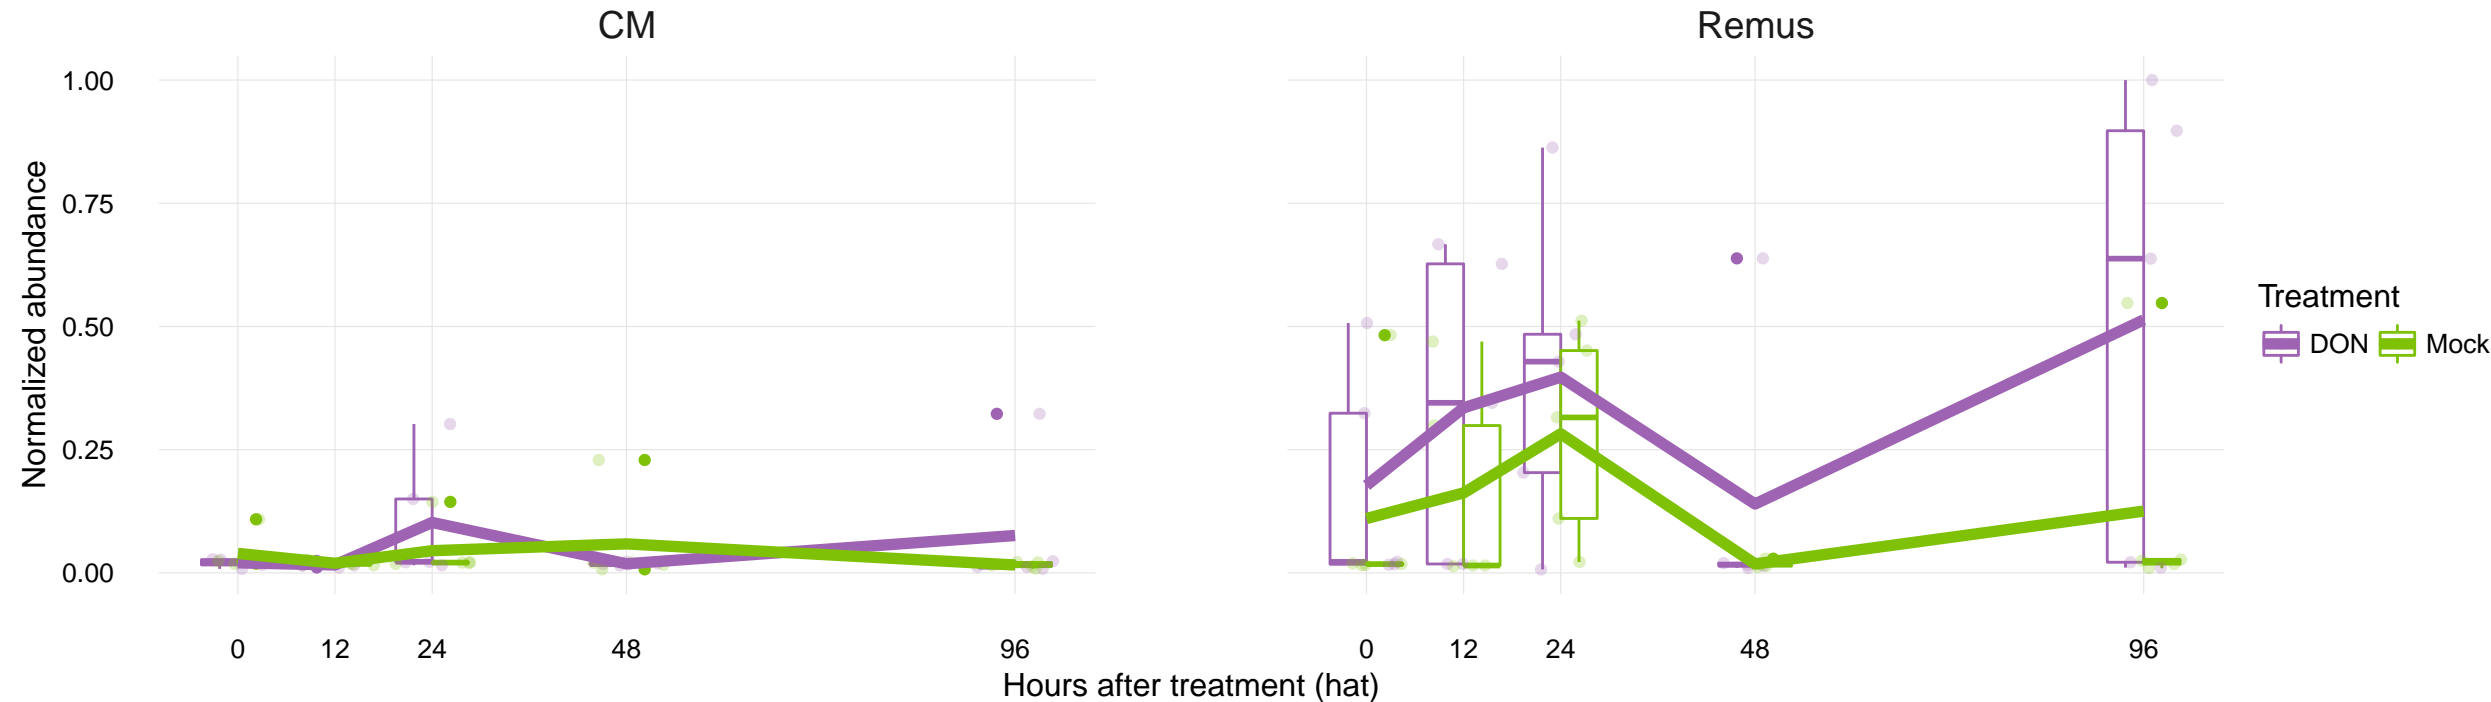

## DON, Mock; all four genotypes

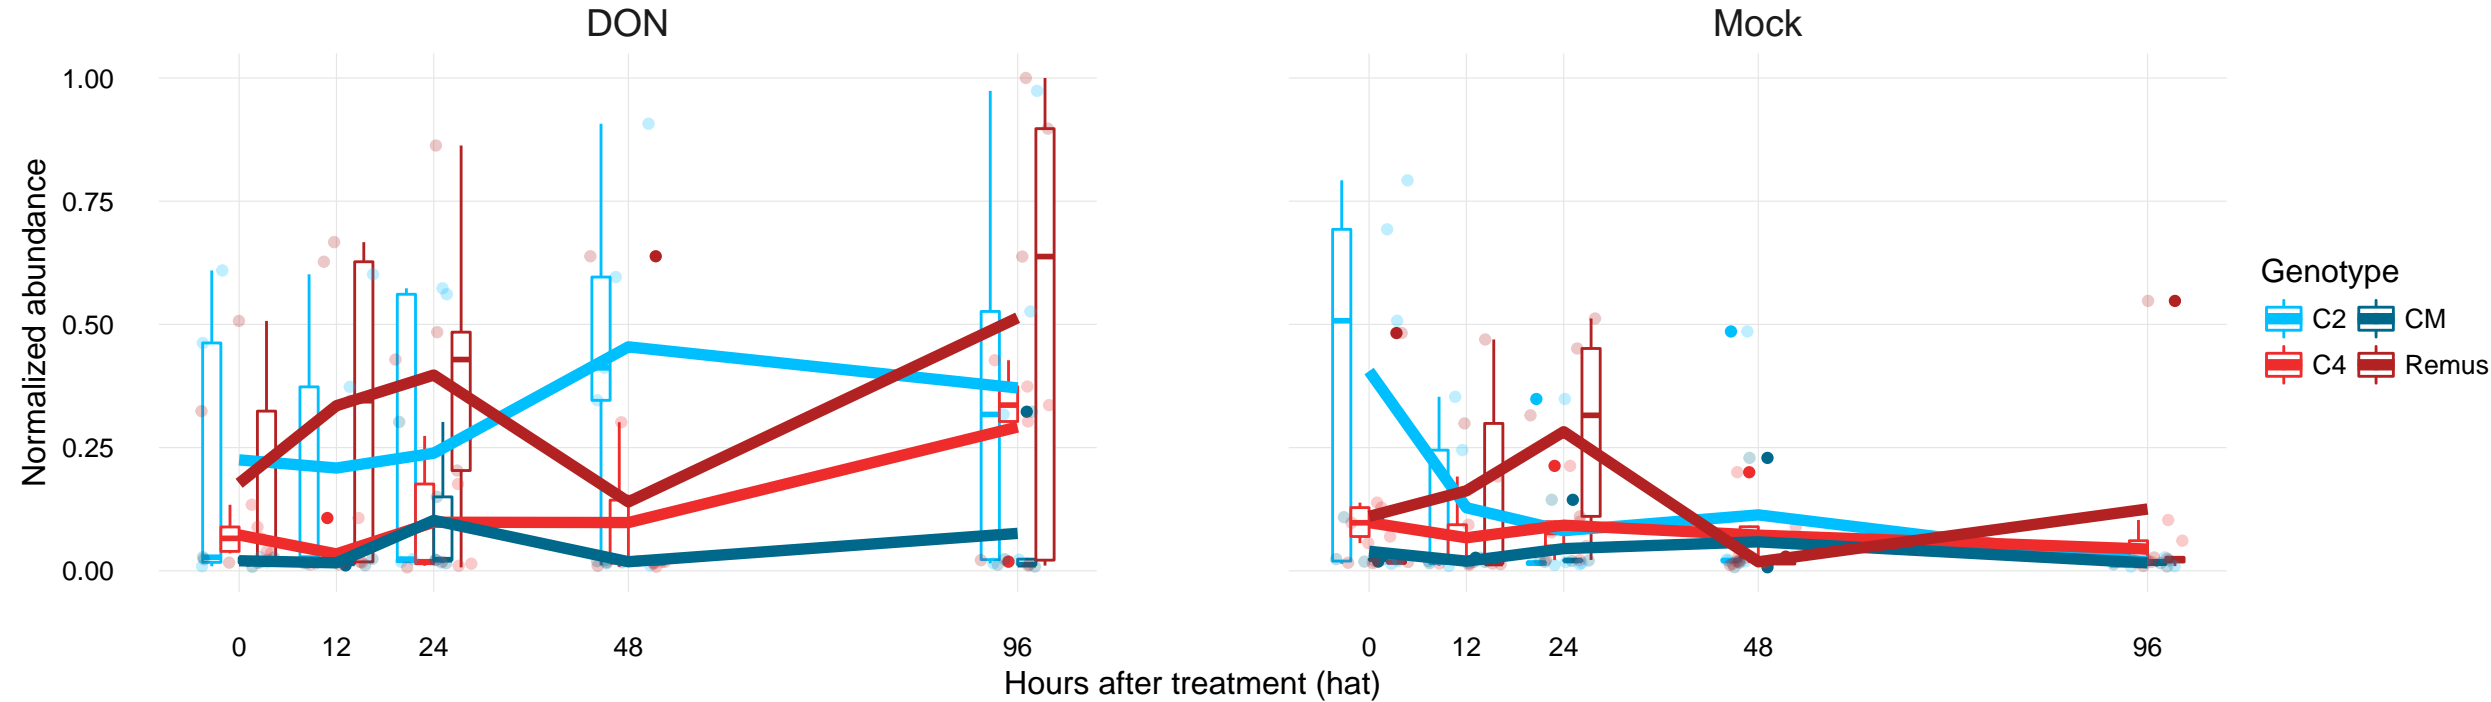



A.72

Annotated as Lignan  
(1 database hit)

|                |                                                |
|----------------|------------------------------------------------|
| MZ             | 551.2125                                       |
| RT             | 13.8 min                                       |
| Normalization  | Indirectly via surrogate<br>in the KPX samples |
| Cluster        | –                                              |
| Cn total / Phe | 27 /                                           |

C2, C4; different treatments

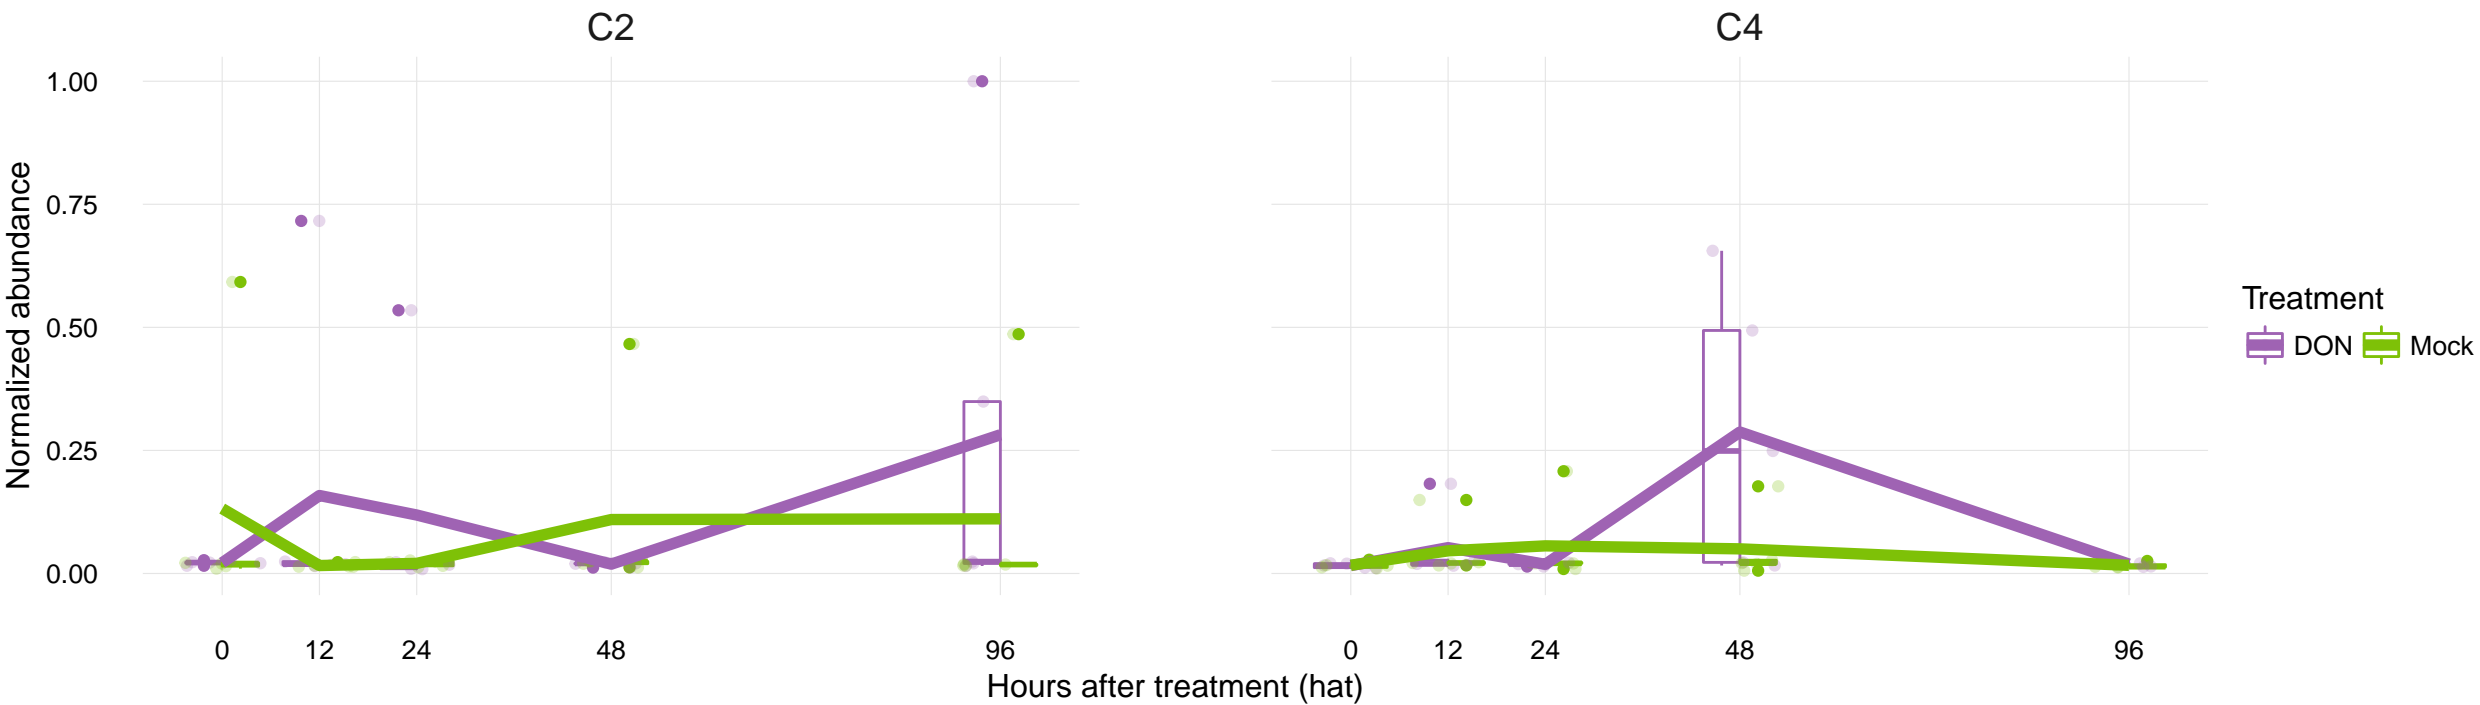

DON, Mock; different genotypes

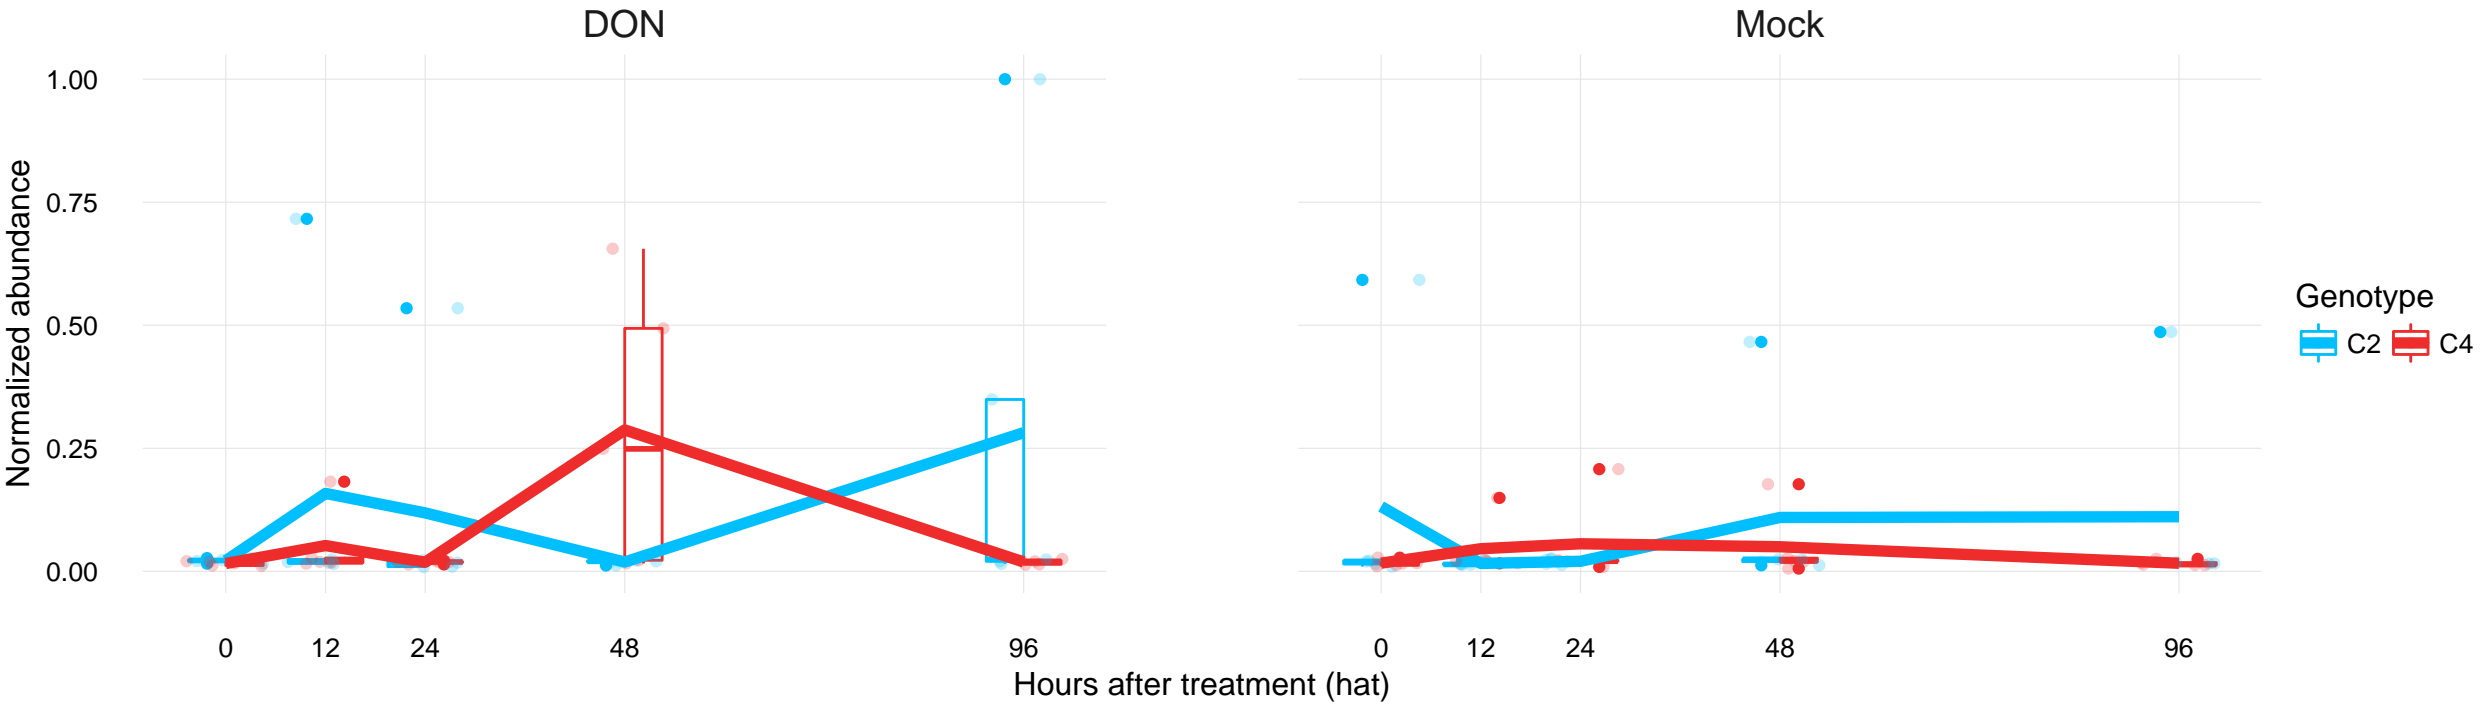

CM, Remus; different treatments

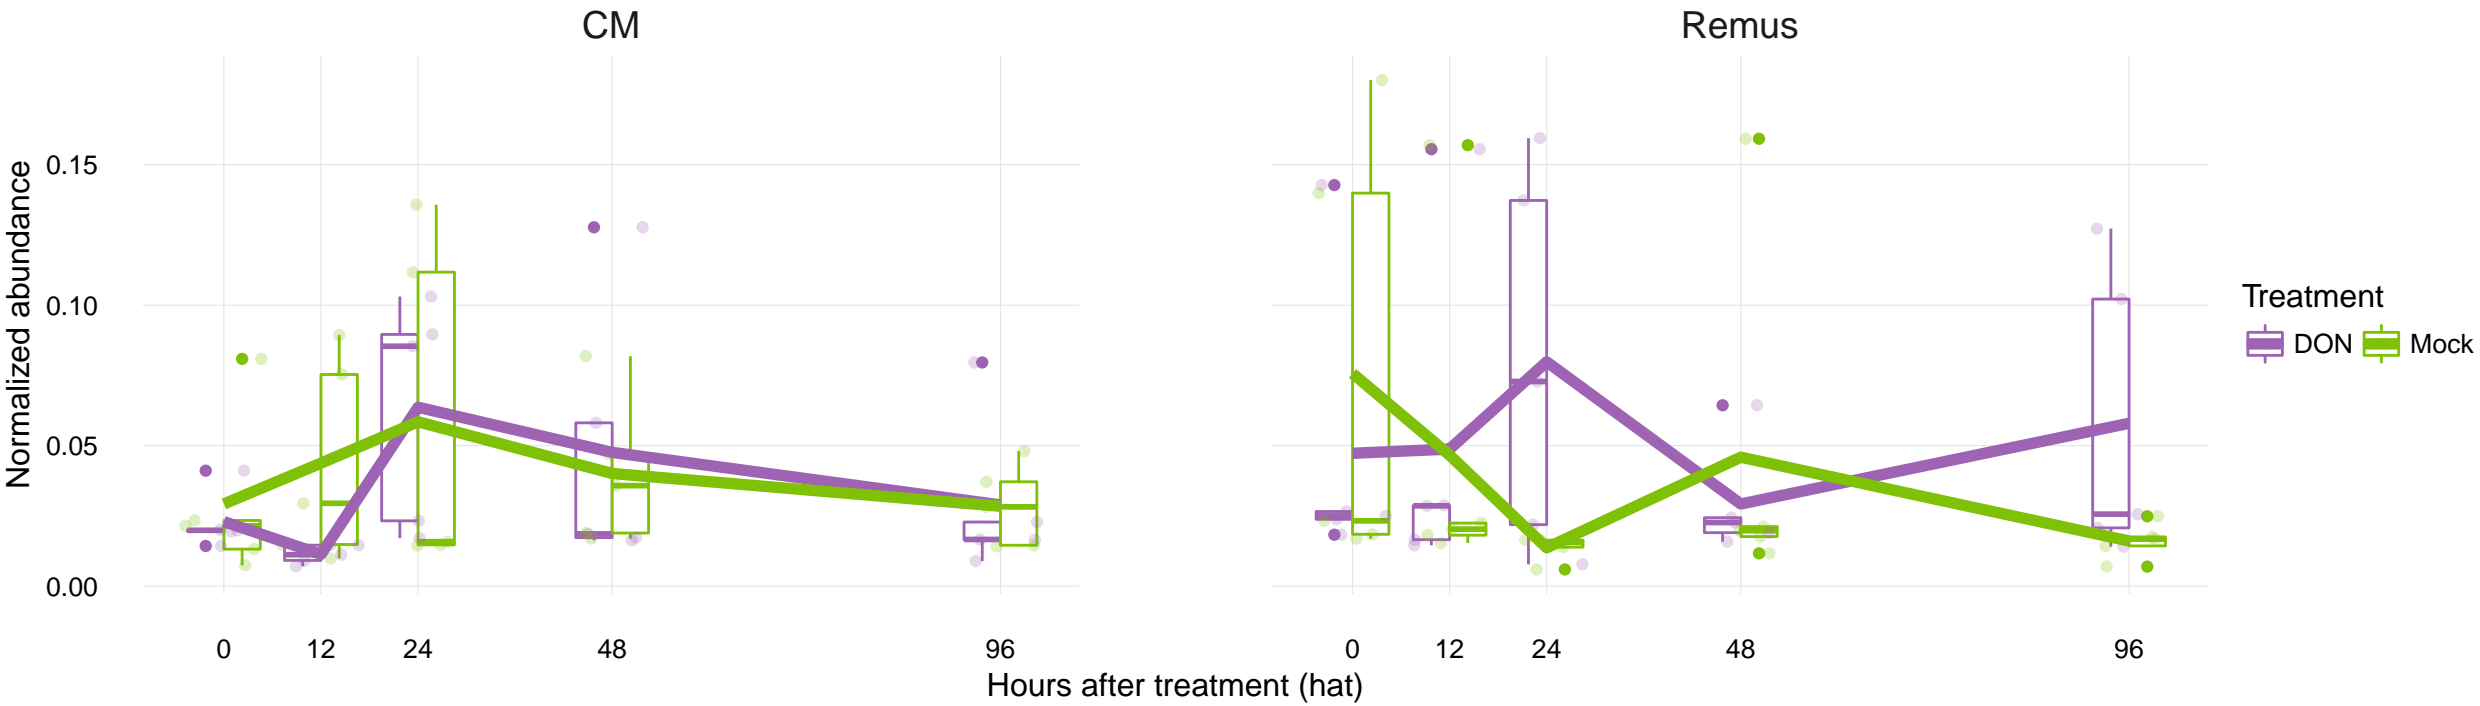

DON, Mock; all four genotypes

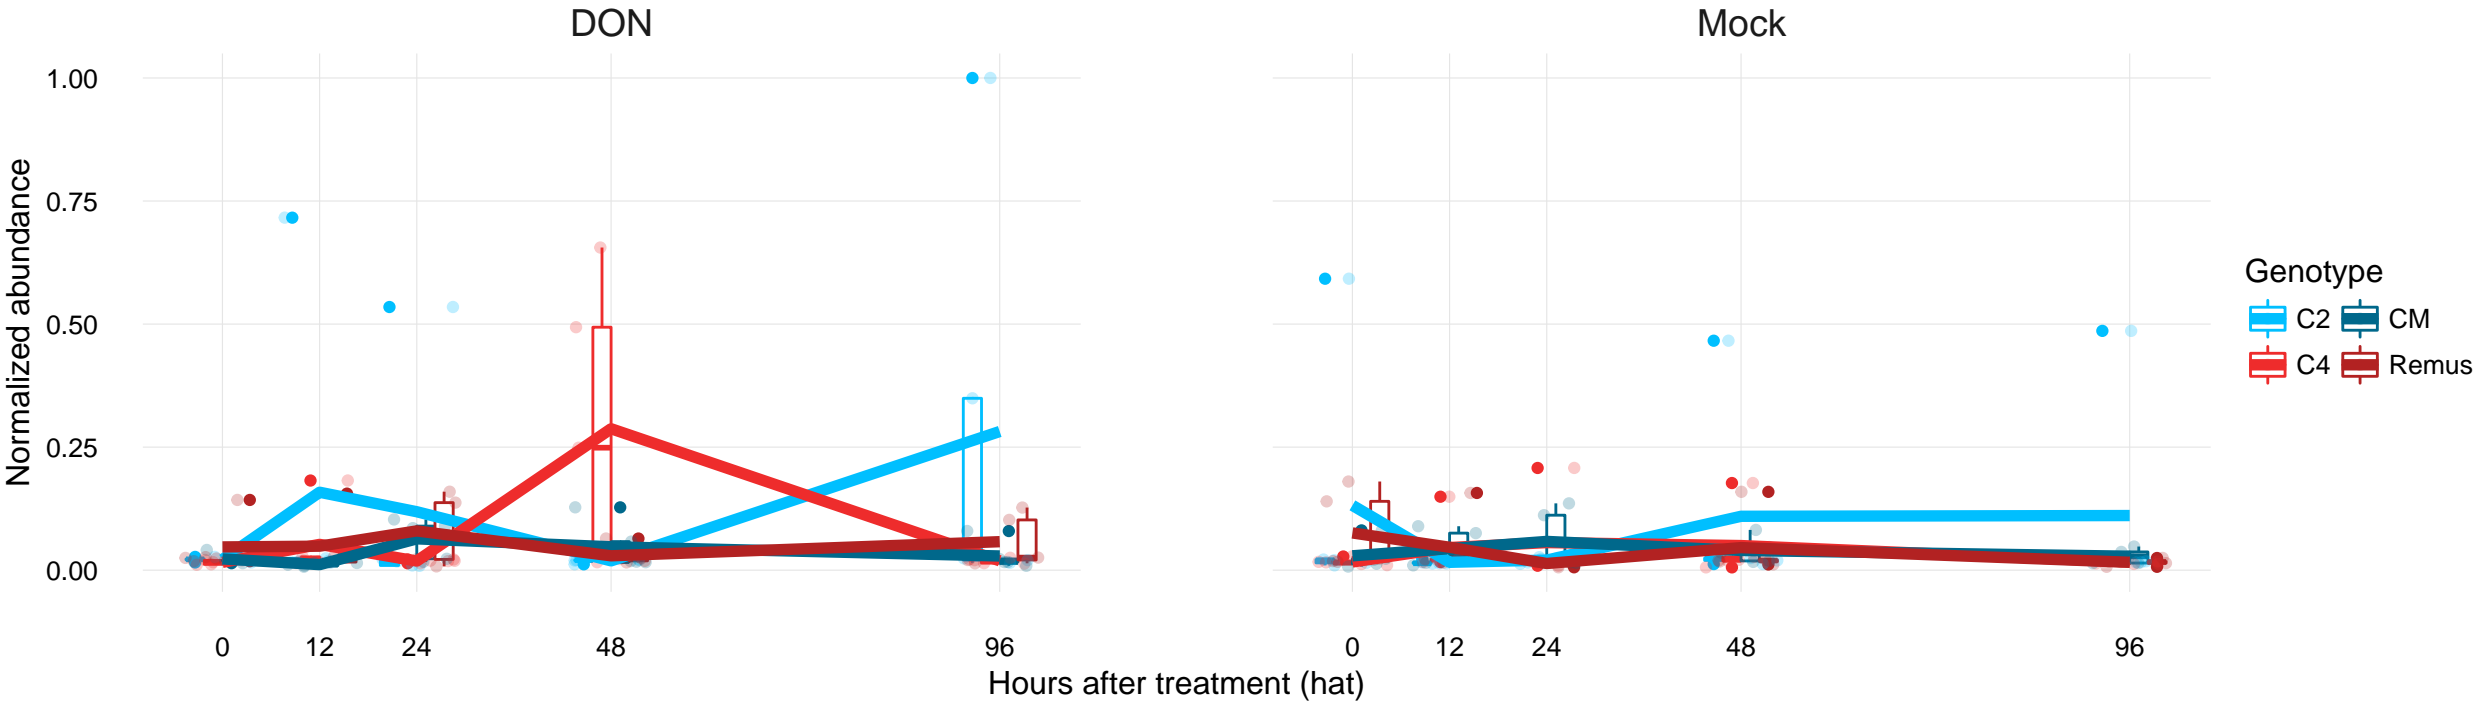

# A.113

Annotated as others  
(1 database hit)

|                |                          |
|----------------|--------------------------|
| MZ             | 125.0596                 |
| RT             | 18 min                   |
| Normalization  | Directly via KPX samples |
| Cluster        | –                        |
| Cn total / Phe | 7 /                      |

## C2, C4; different treatments

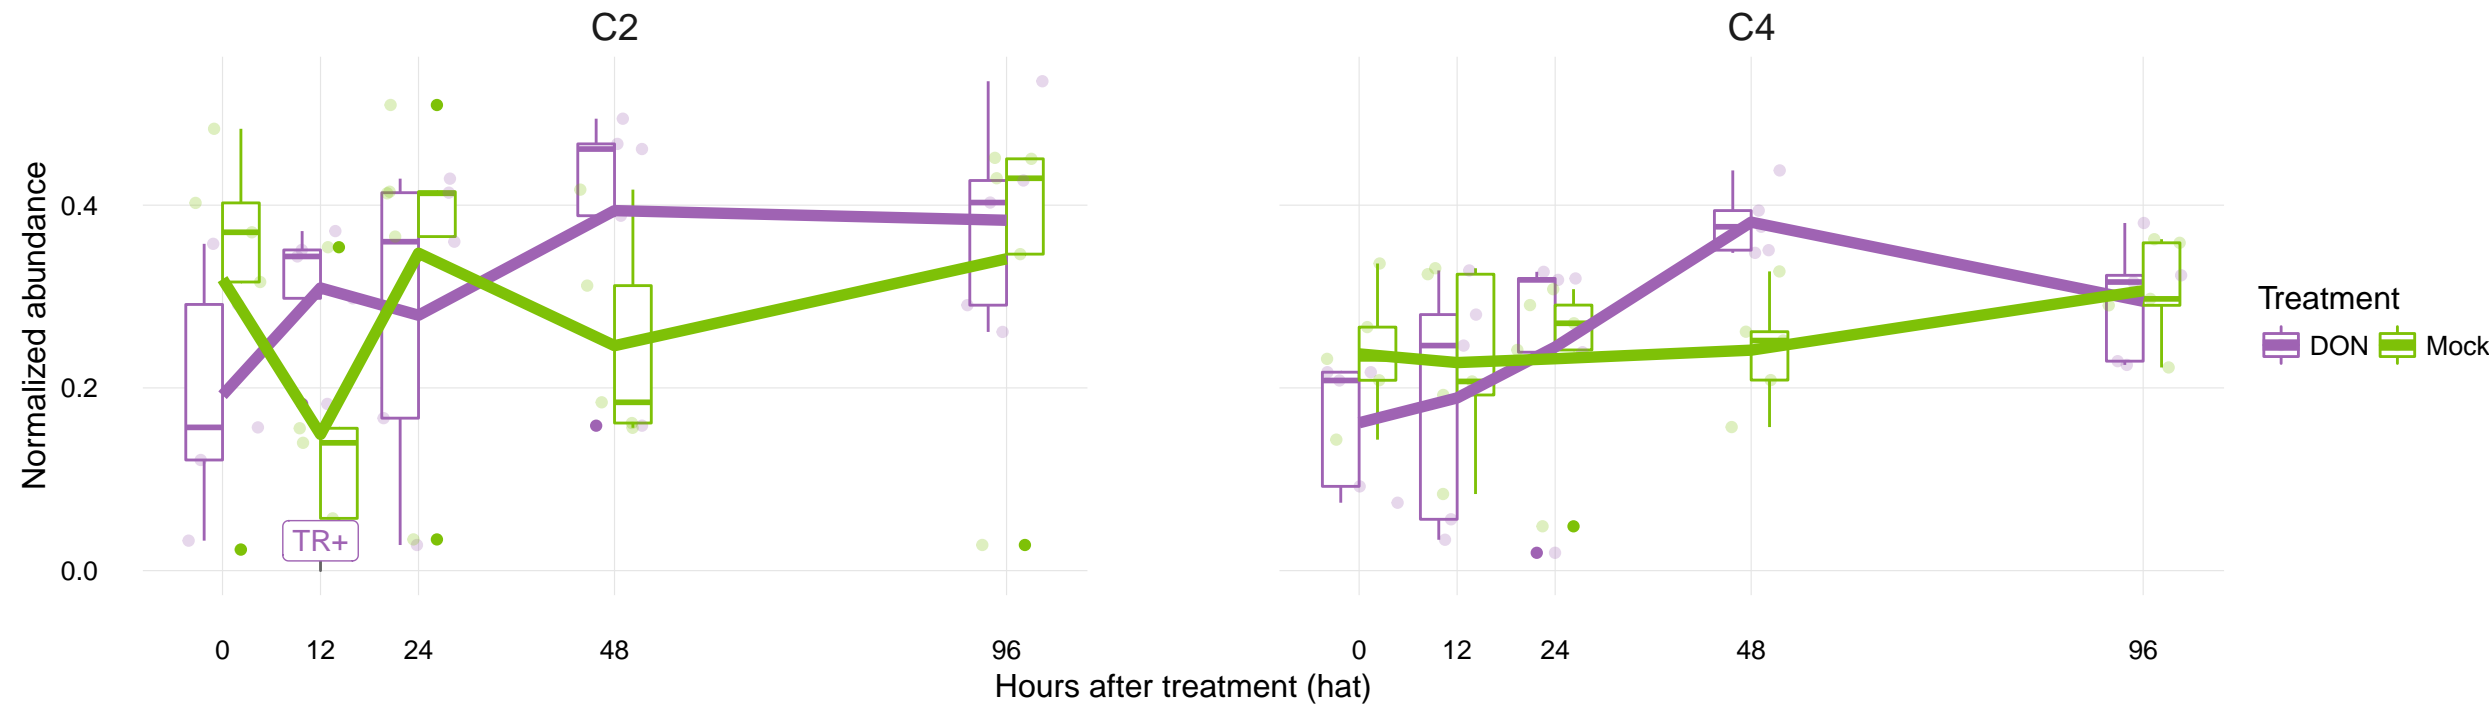

## DON, Mock; different genotypes

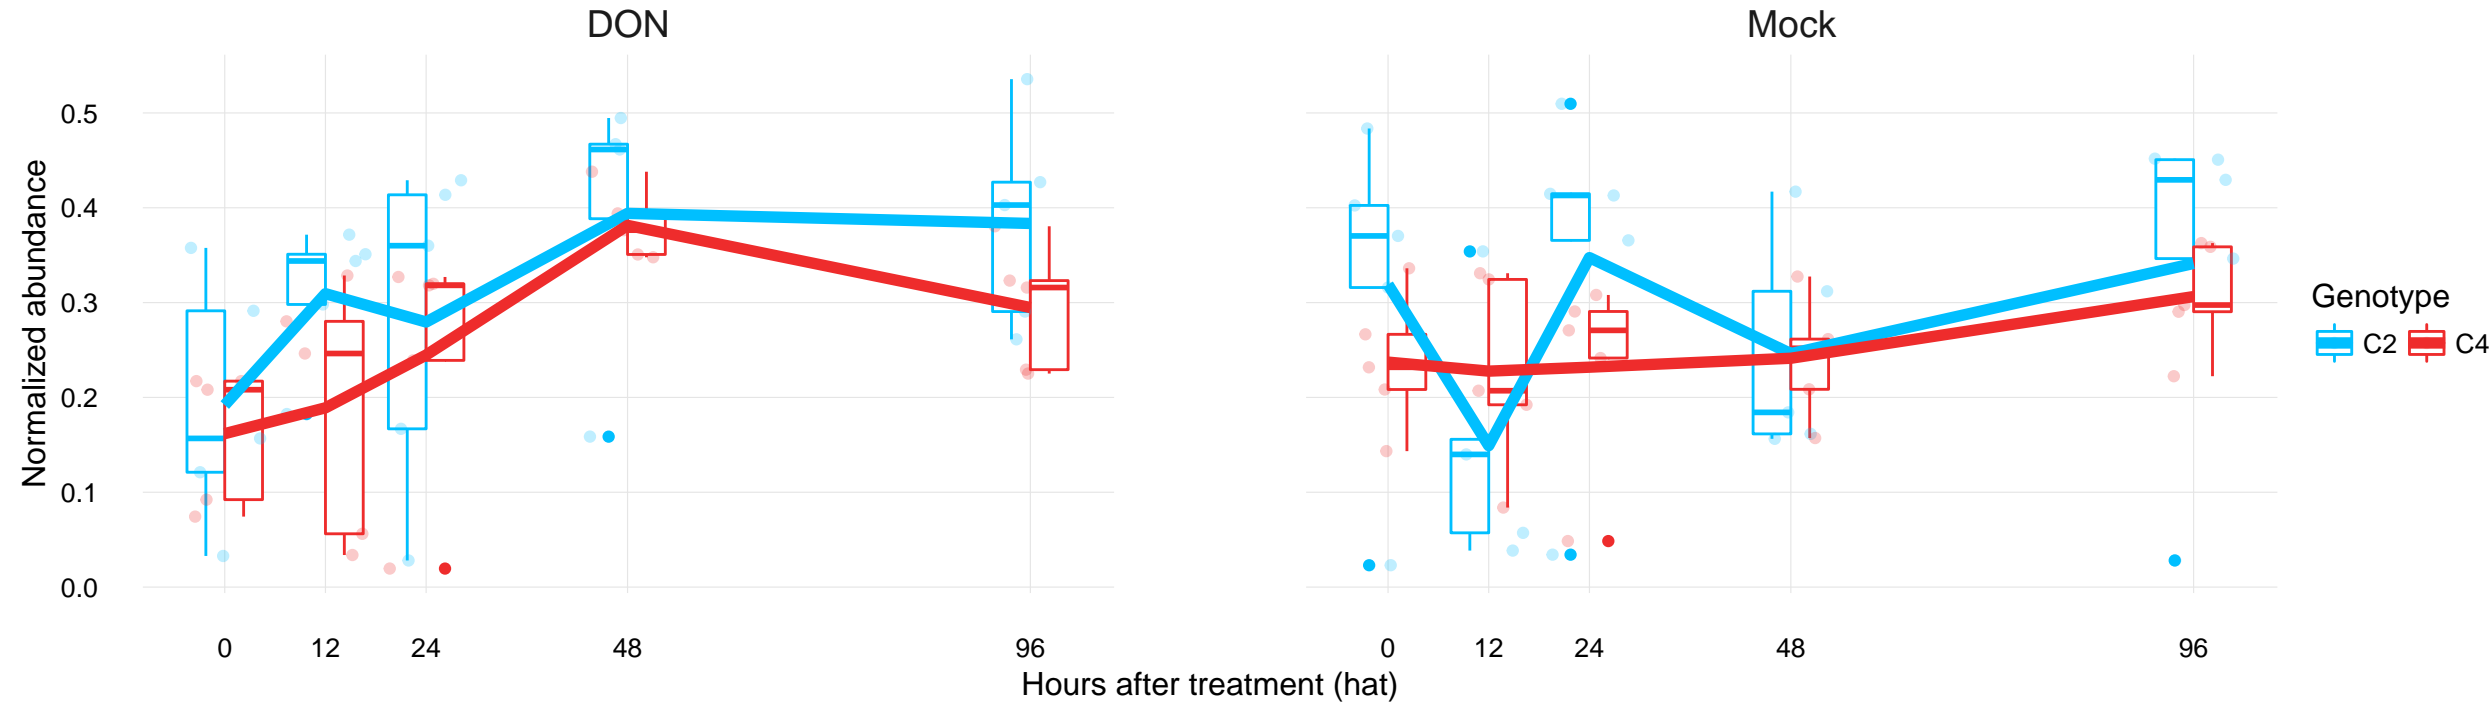

## CM, Remus; different treatments

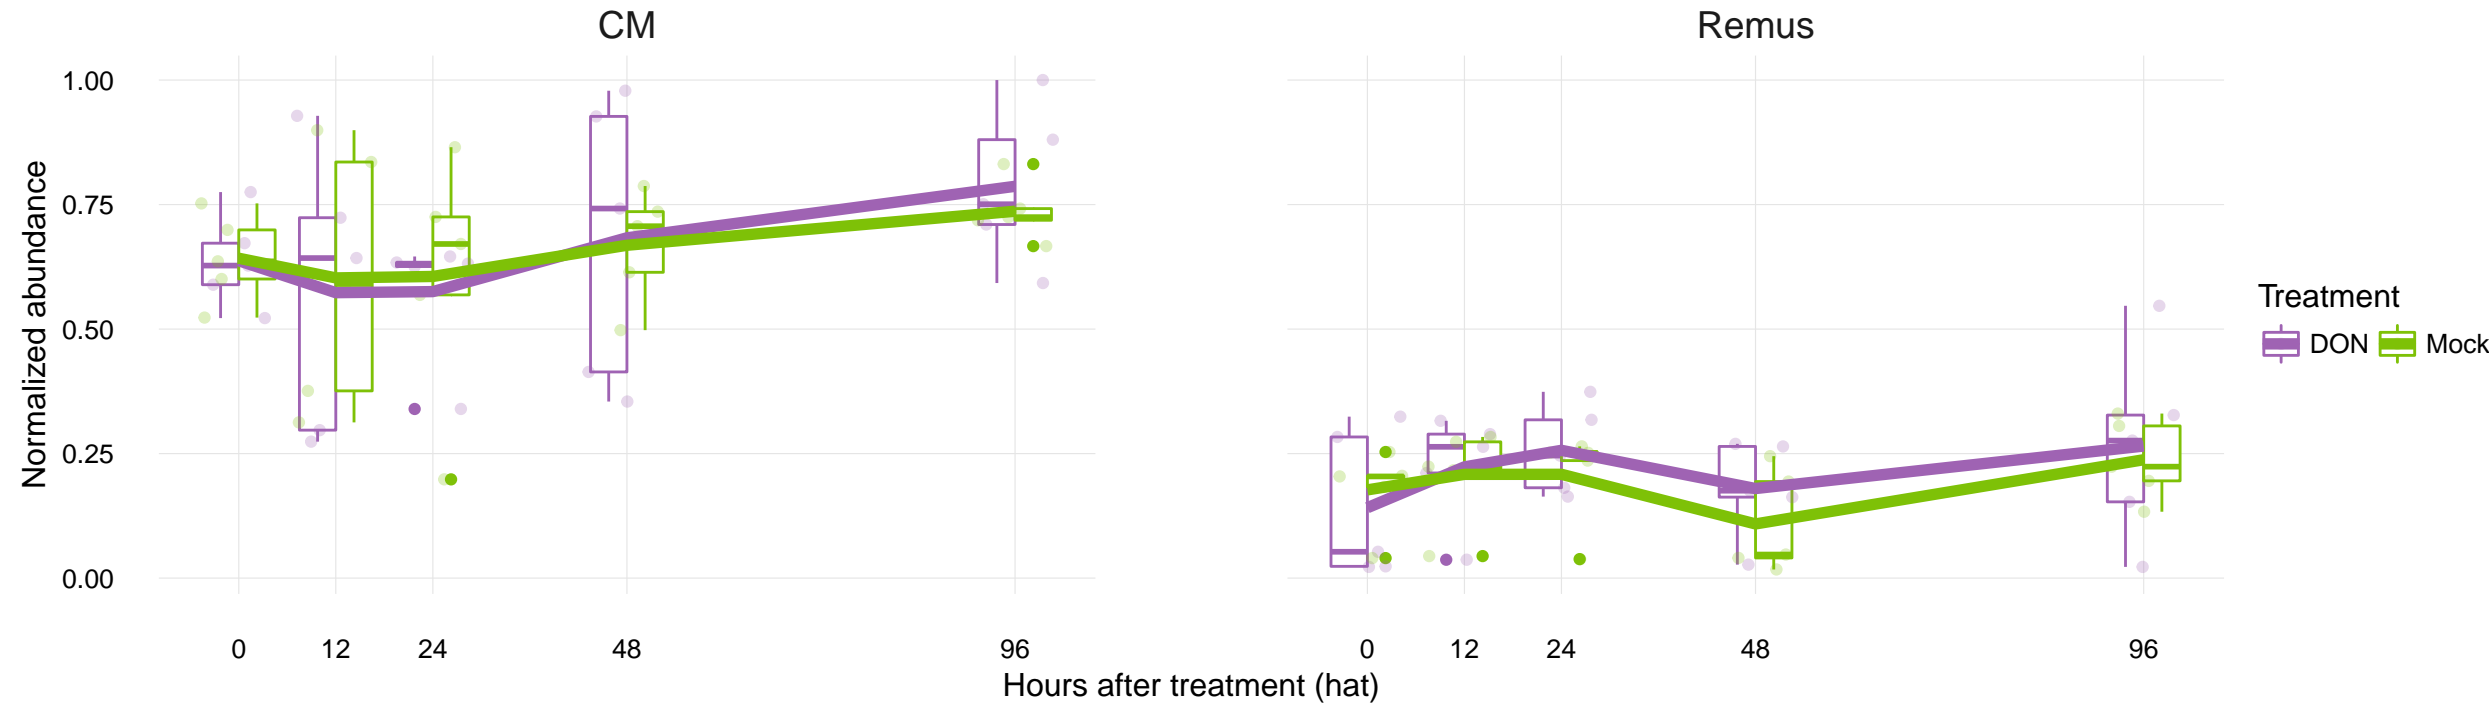

## DON, Mock; all four genotypes

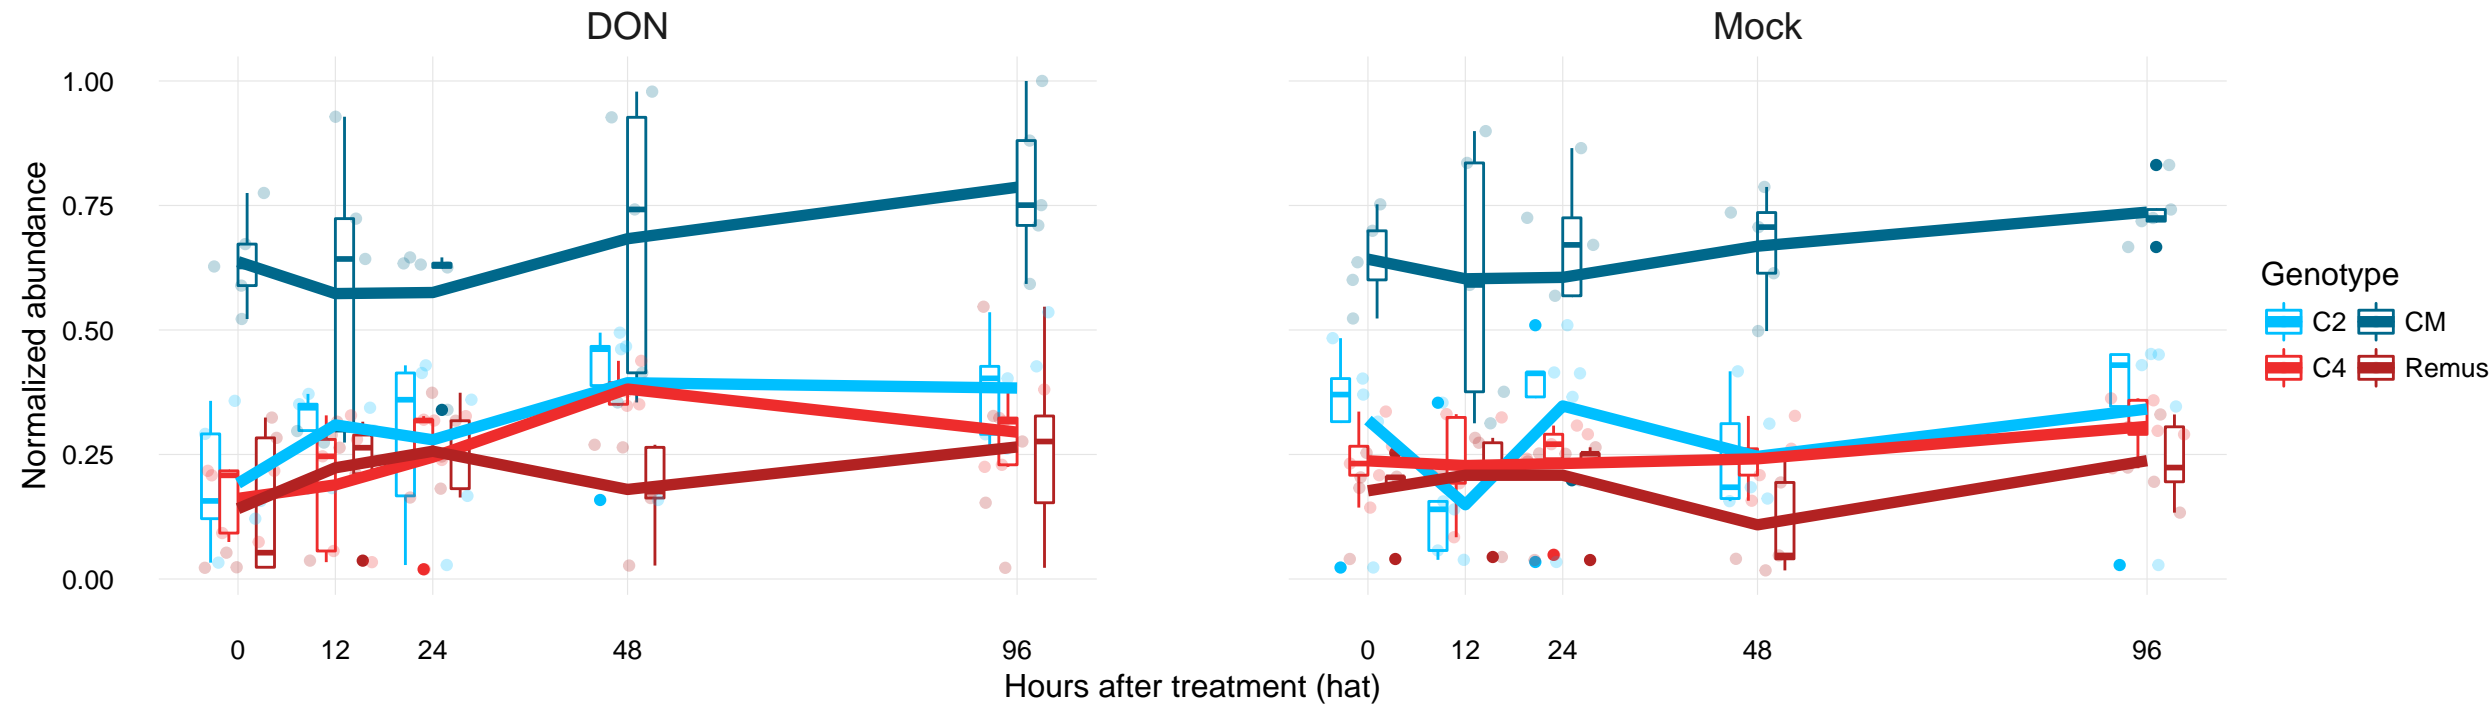

# A.34

Annotated as HCAA  
(1 database hit)

|                |                                                |
|----------------|------------------------------------------------|
| MZ             | 277.1667                                       |
| RT             | 9.95 min                                       |
| Normalization  | Indirectly via surrogate<br>in the KPX samples |
| Cluster        | –                                              |
| Cn total / Phe | 9 / 9                                          |

## C2, C4; different treatments

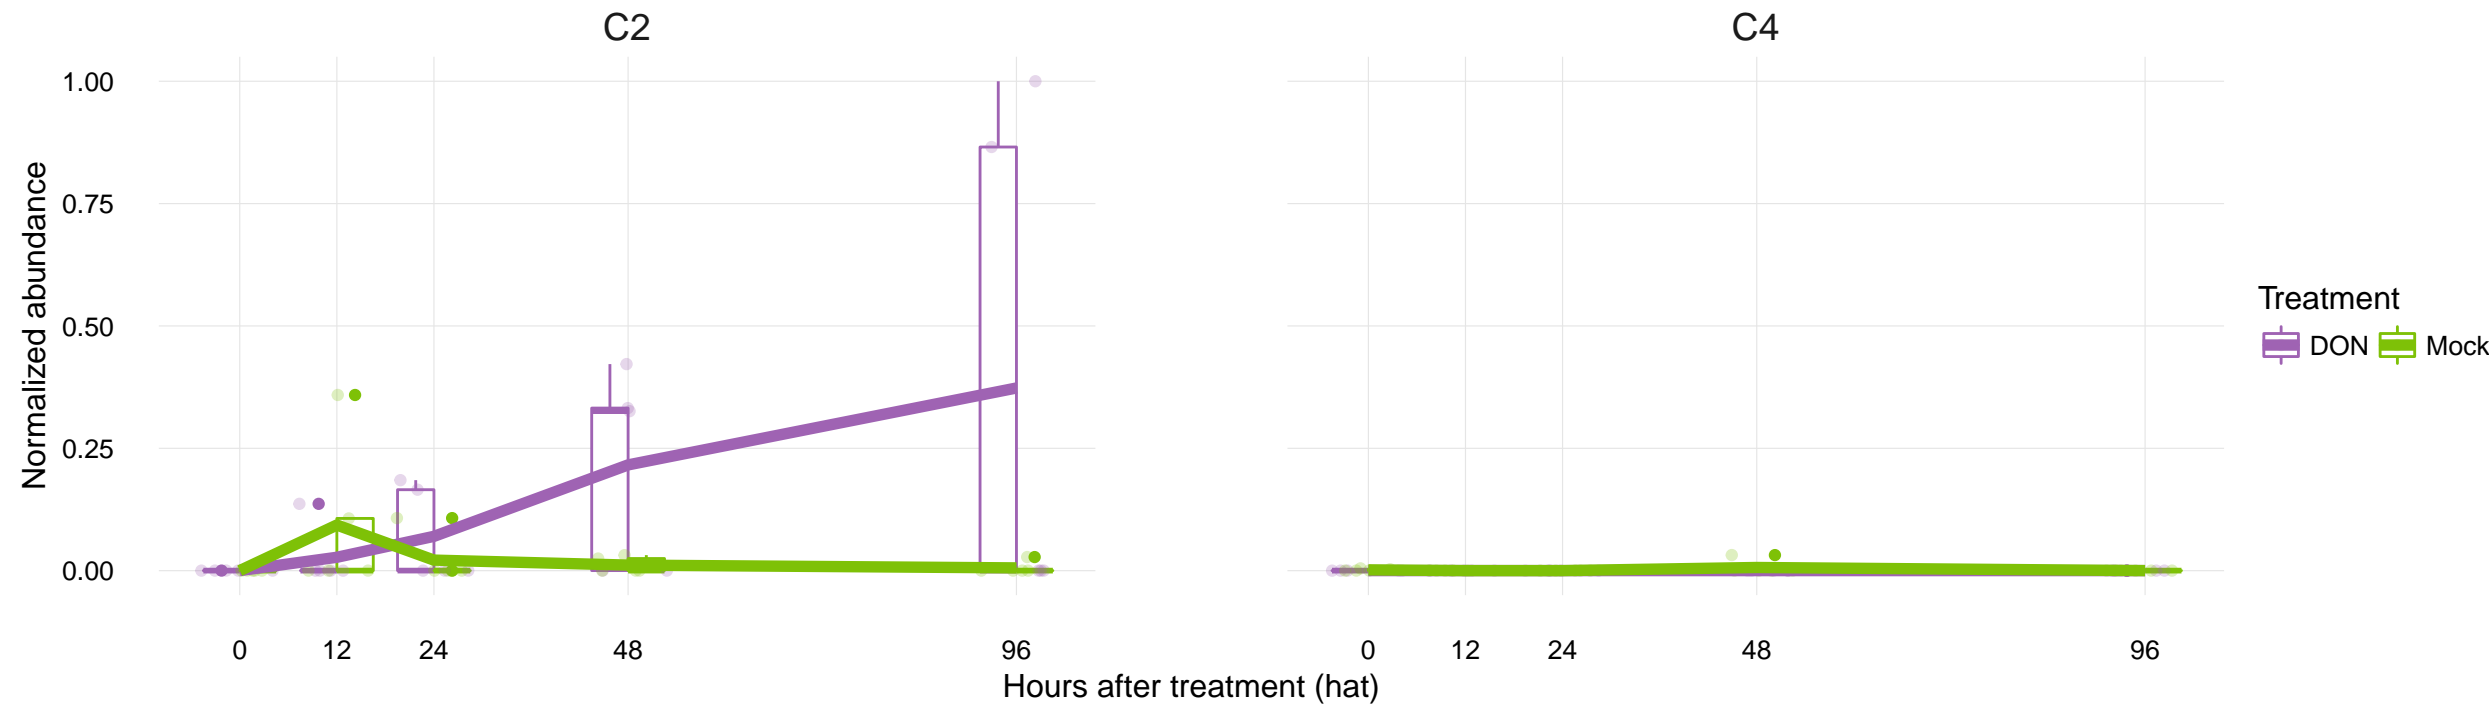

## DON, Mock; different genotypes

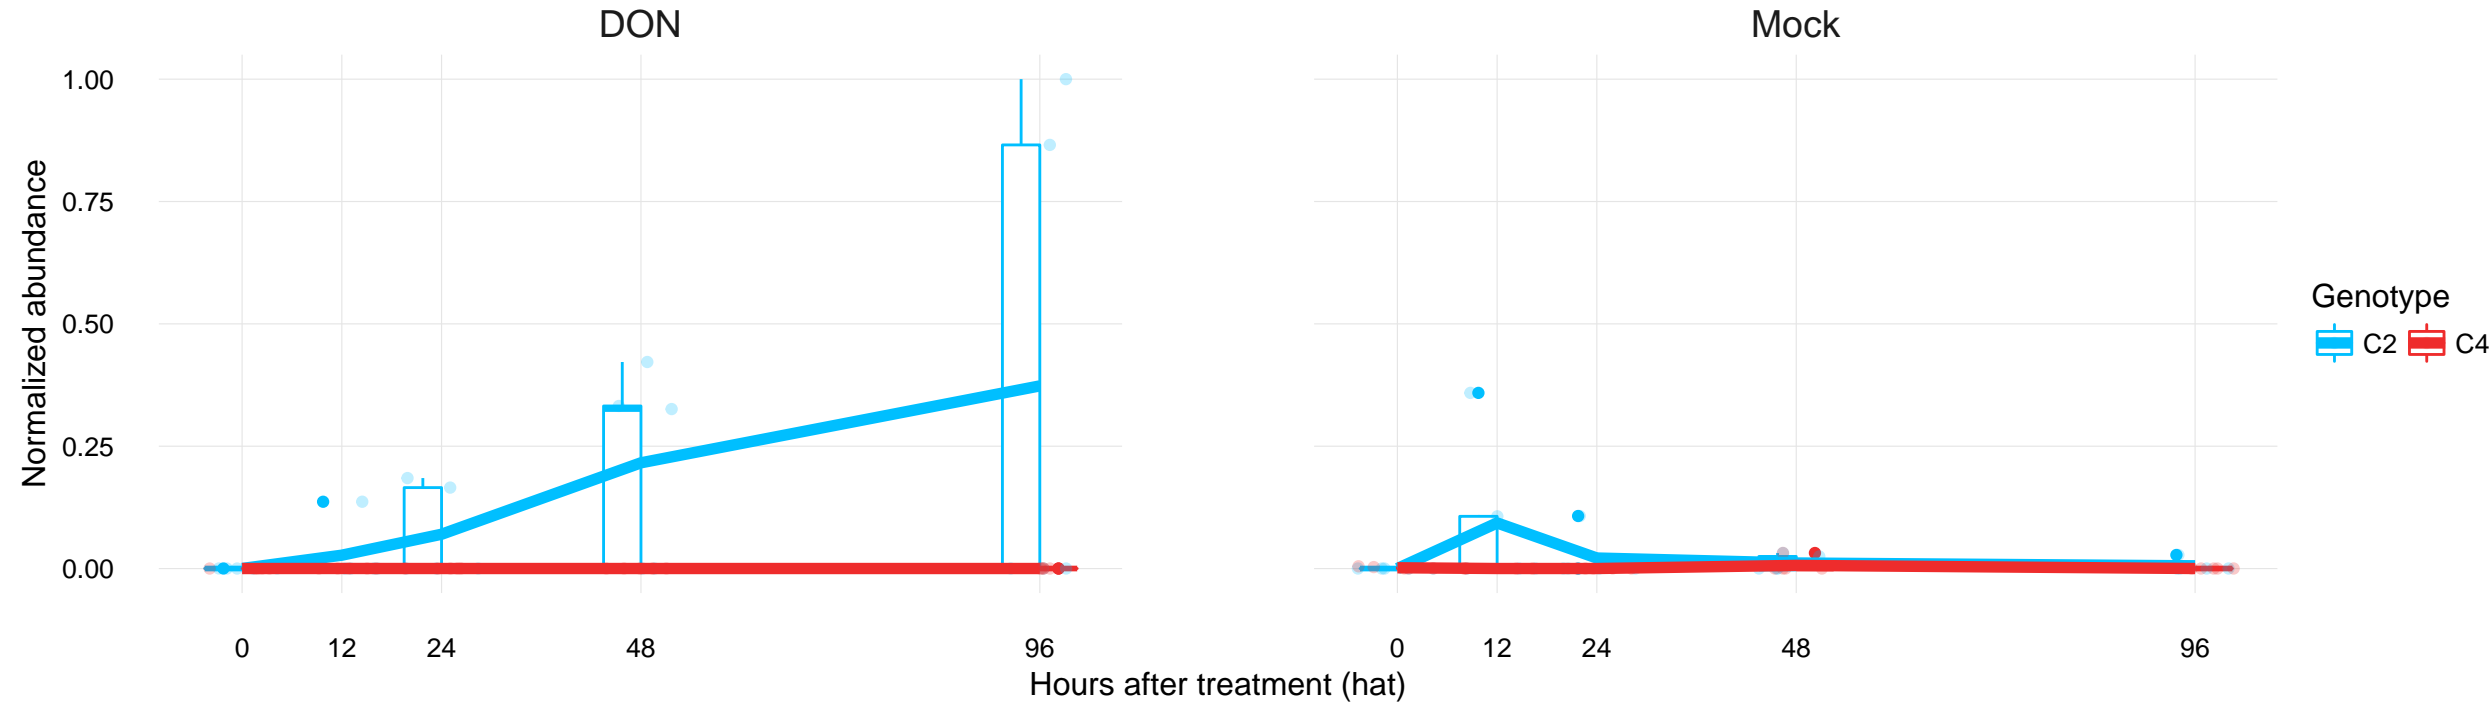

## CM, Remus; different treatments

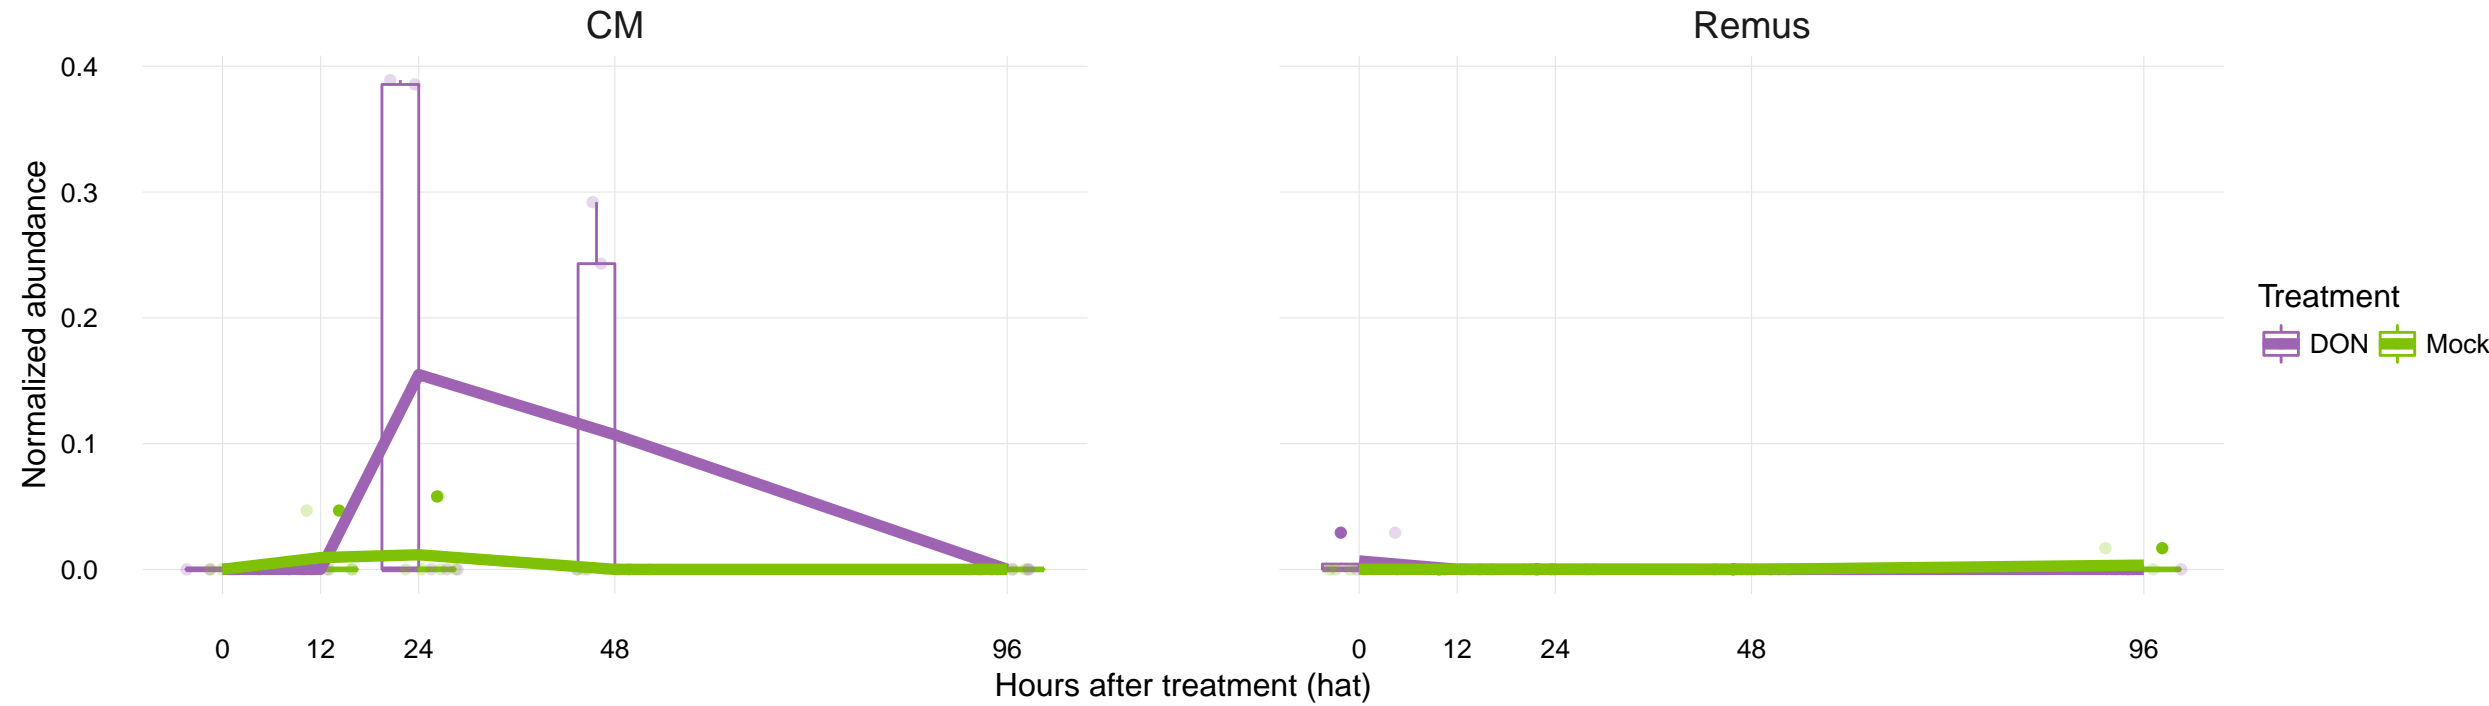

## DON, Mock; all four genotypes

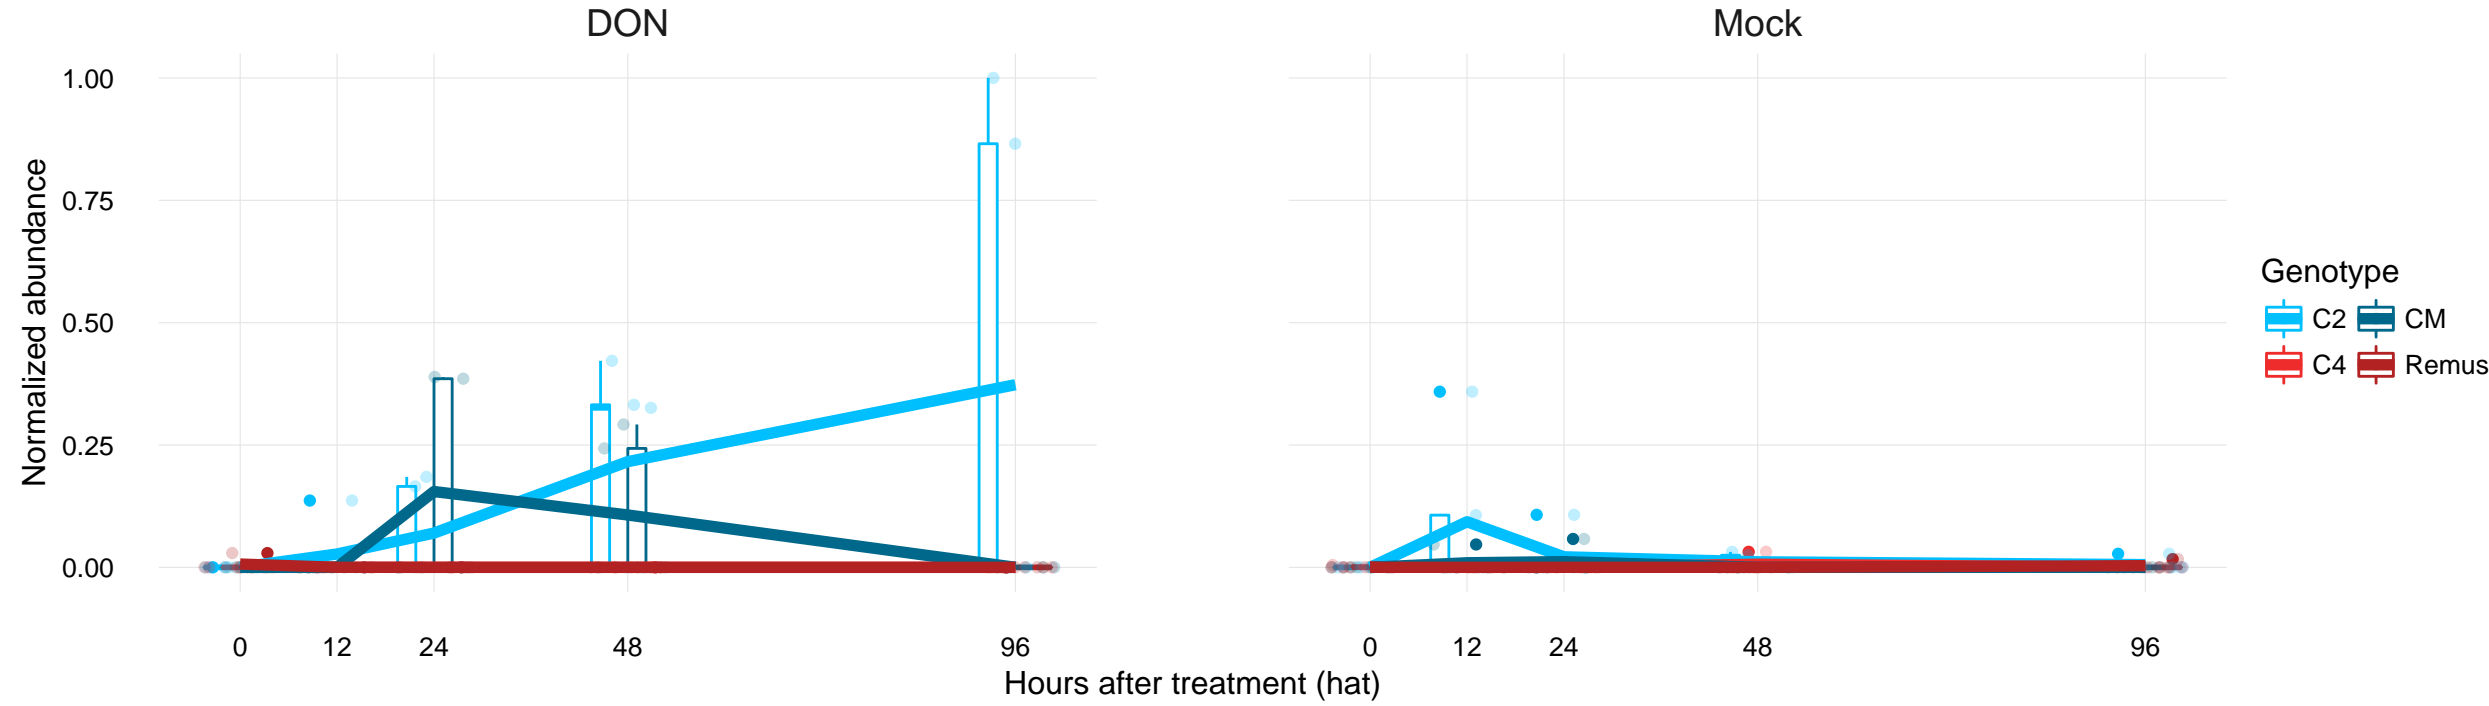

# A.126

Annotated as Flavonoid (GlcF)  
(1 database hit)

|                |                          |
|----------------|--------------------------|
| MZ             | 557.1654                 |
| RT             | 20.5 min                 |
| Normalization  | Directly via KPX samples |
| Cluster        | –                        |
| Cn total / Phe | 28 /                     |

## C2, C4; different treatments

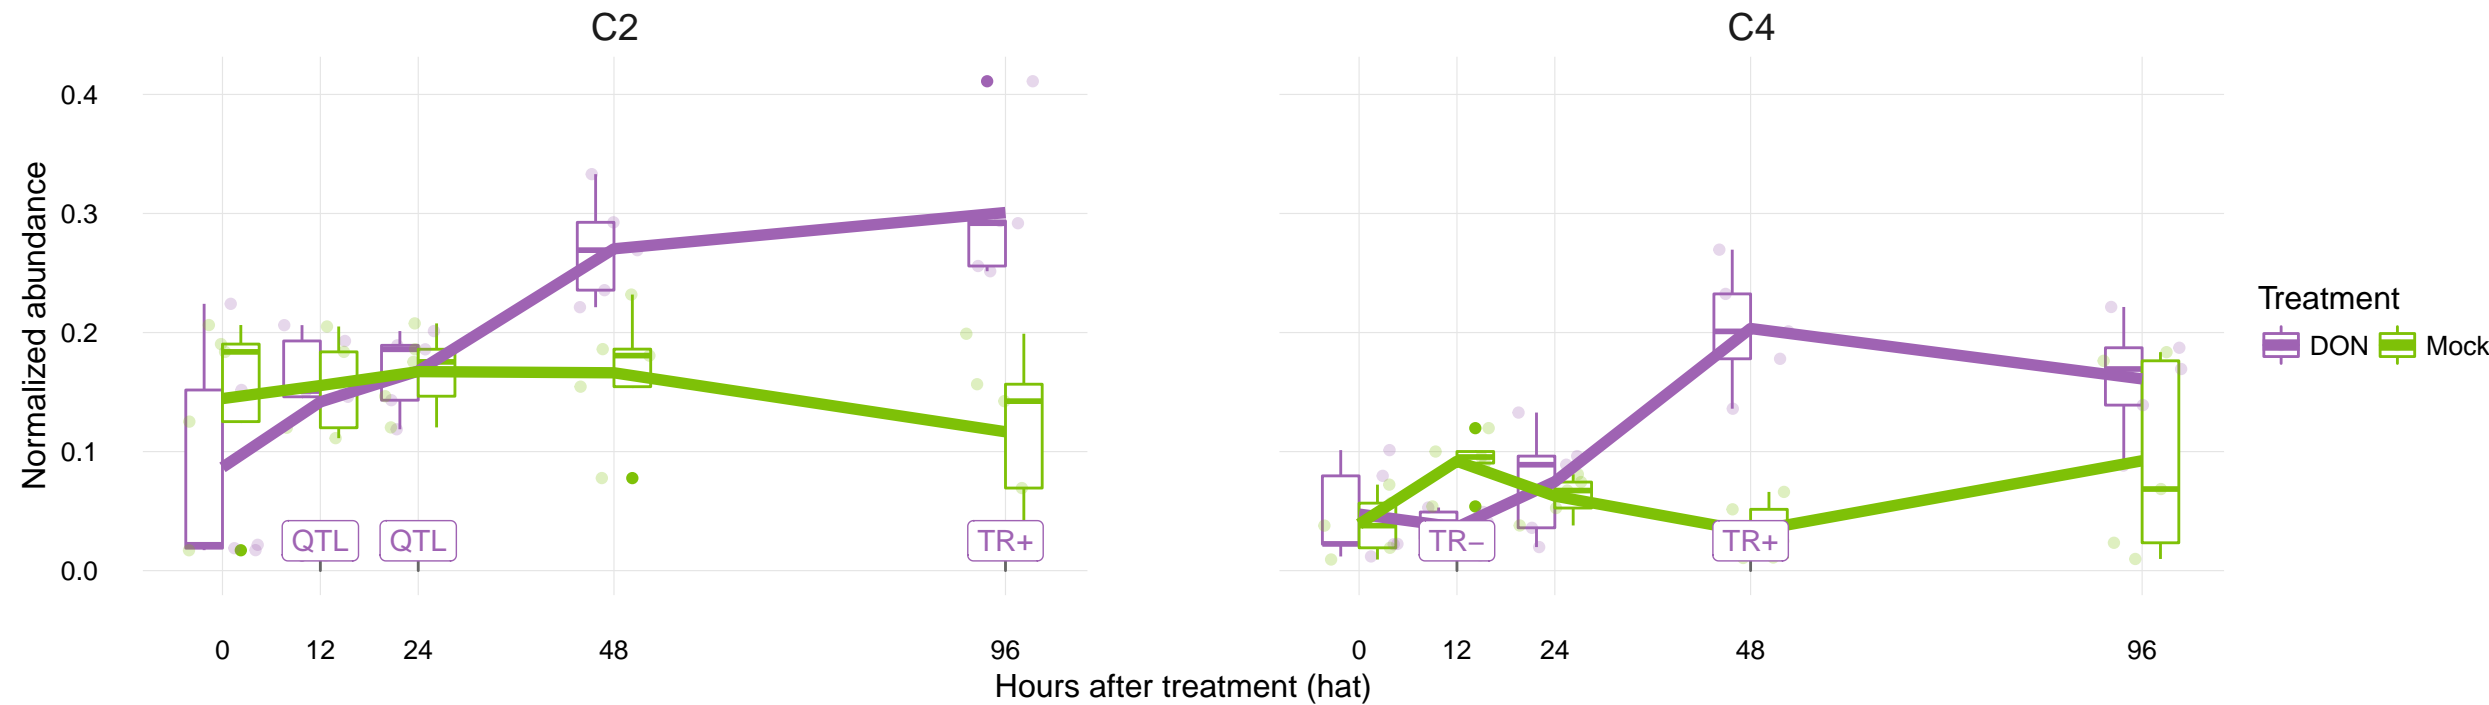

## DON, Mock; different genotypes

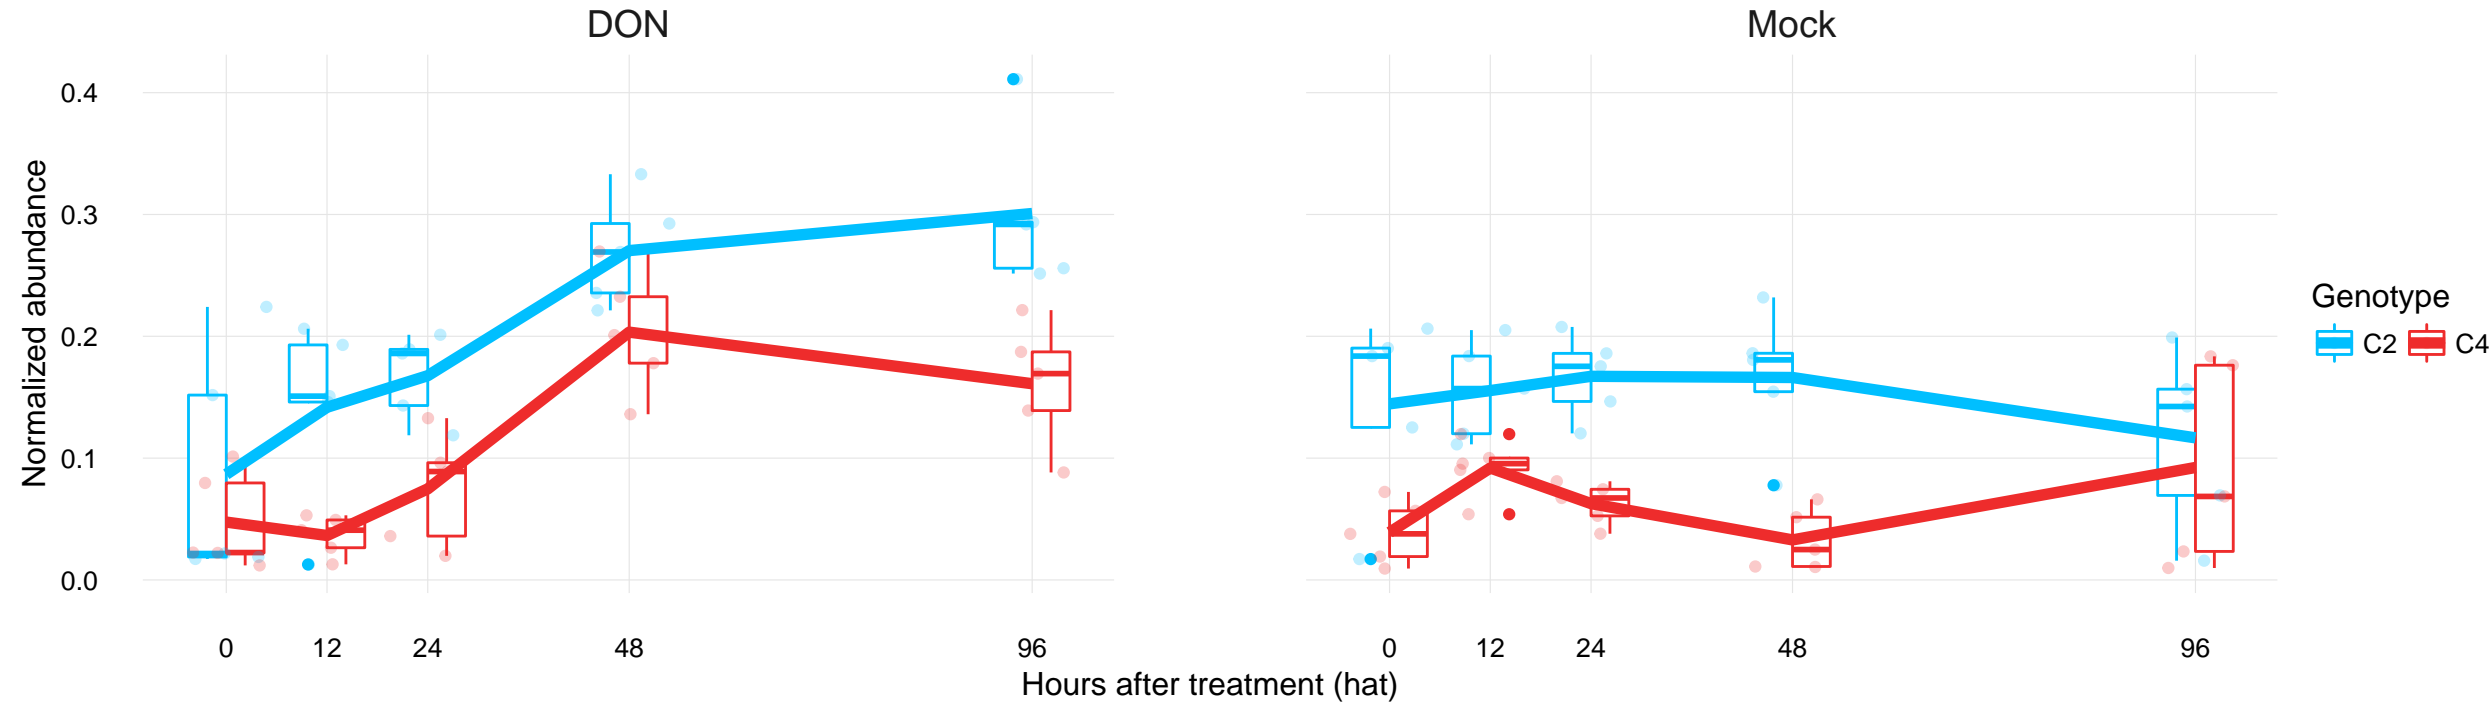

## CM, Remus; different treatments

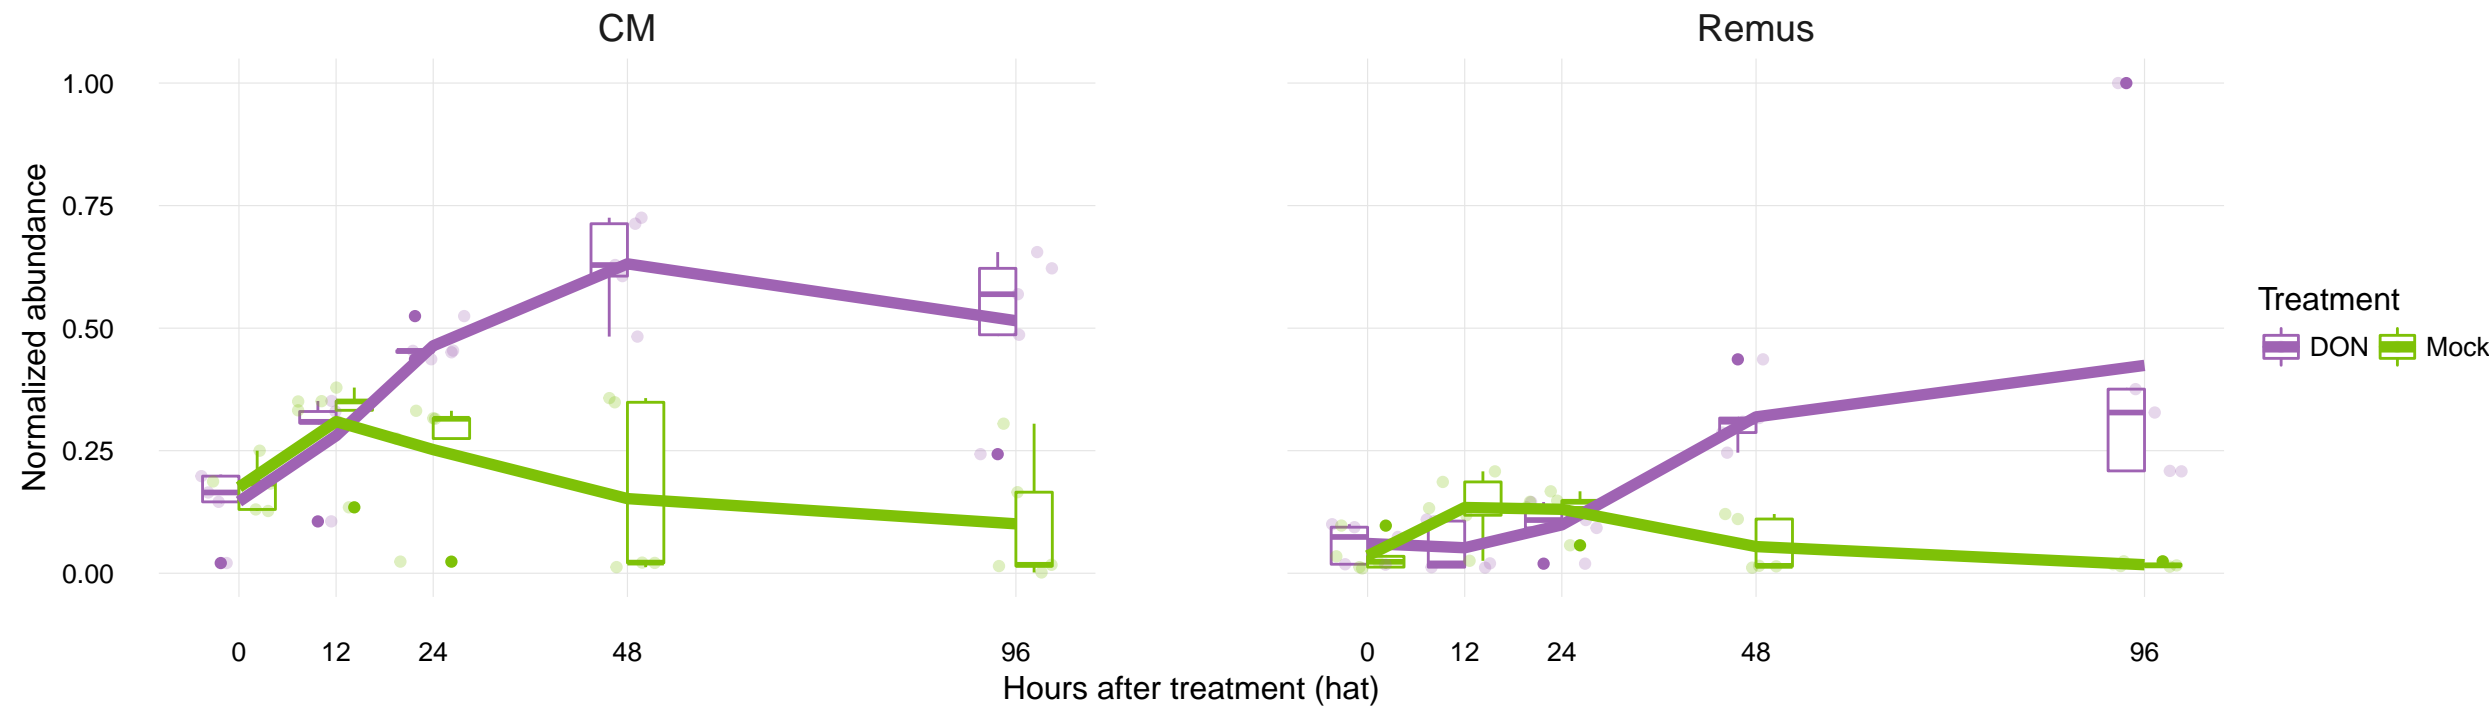

## DON, Mock; all four genotypes

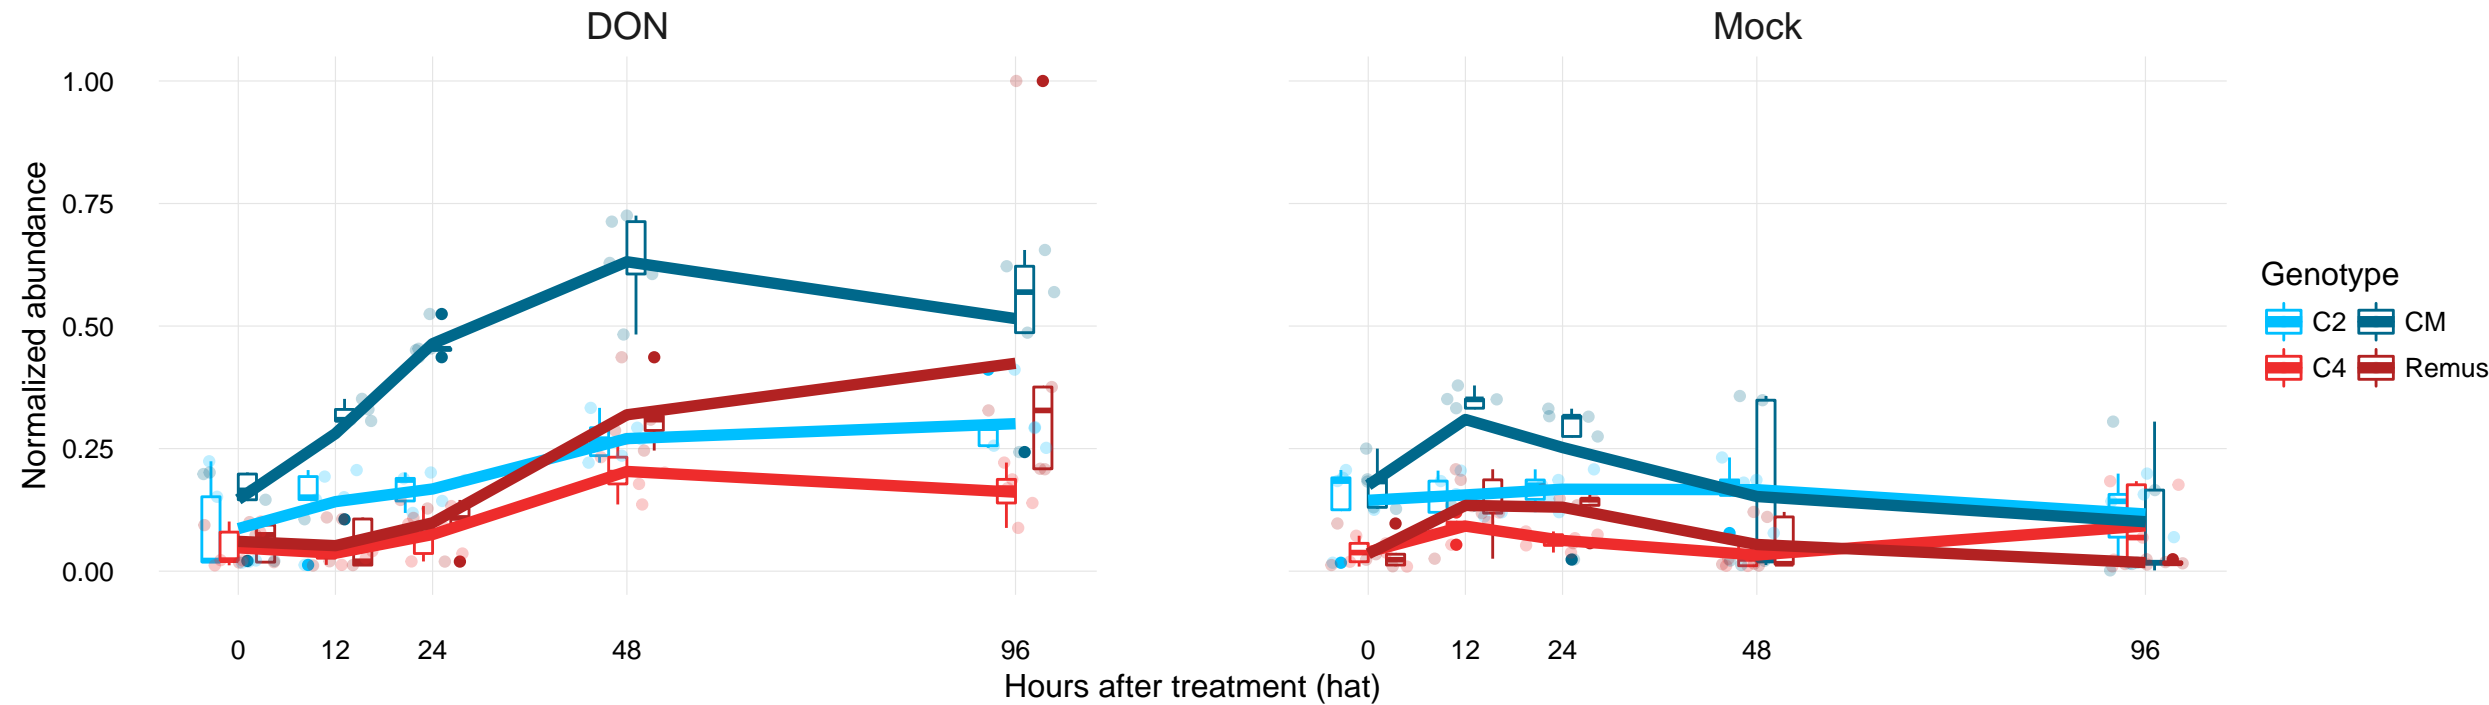

# A.8

Annotated as Putative phenylacetic acid derivative  
(1 database hit)

|                |                |
|----------------|----------------|
| MZ             | 122.0965       |
| RT             | 5.11 min       |
| Normalization  | Not normalized |
| Cluster        | –              |
| Cn total / Phe | 8 / 8          |

## C2, C4; different treatments

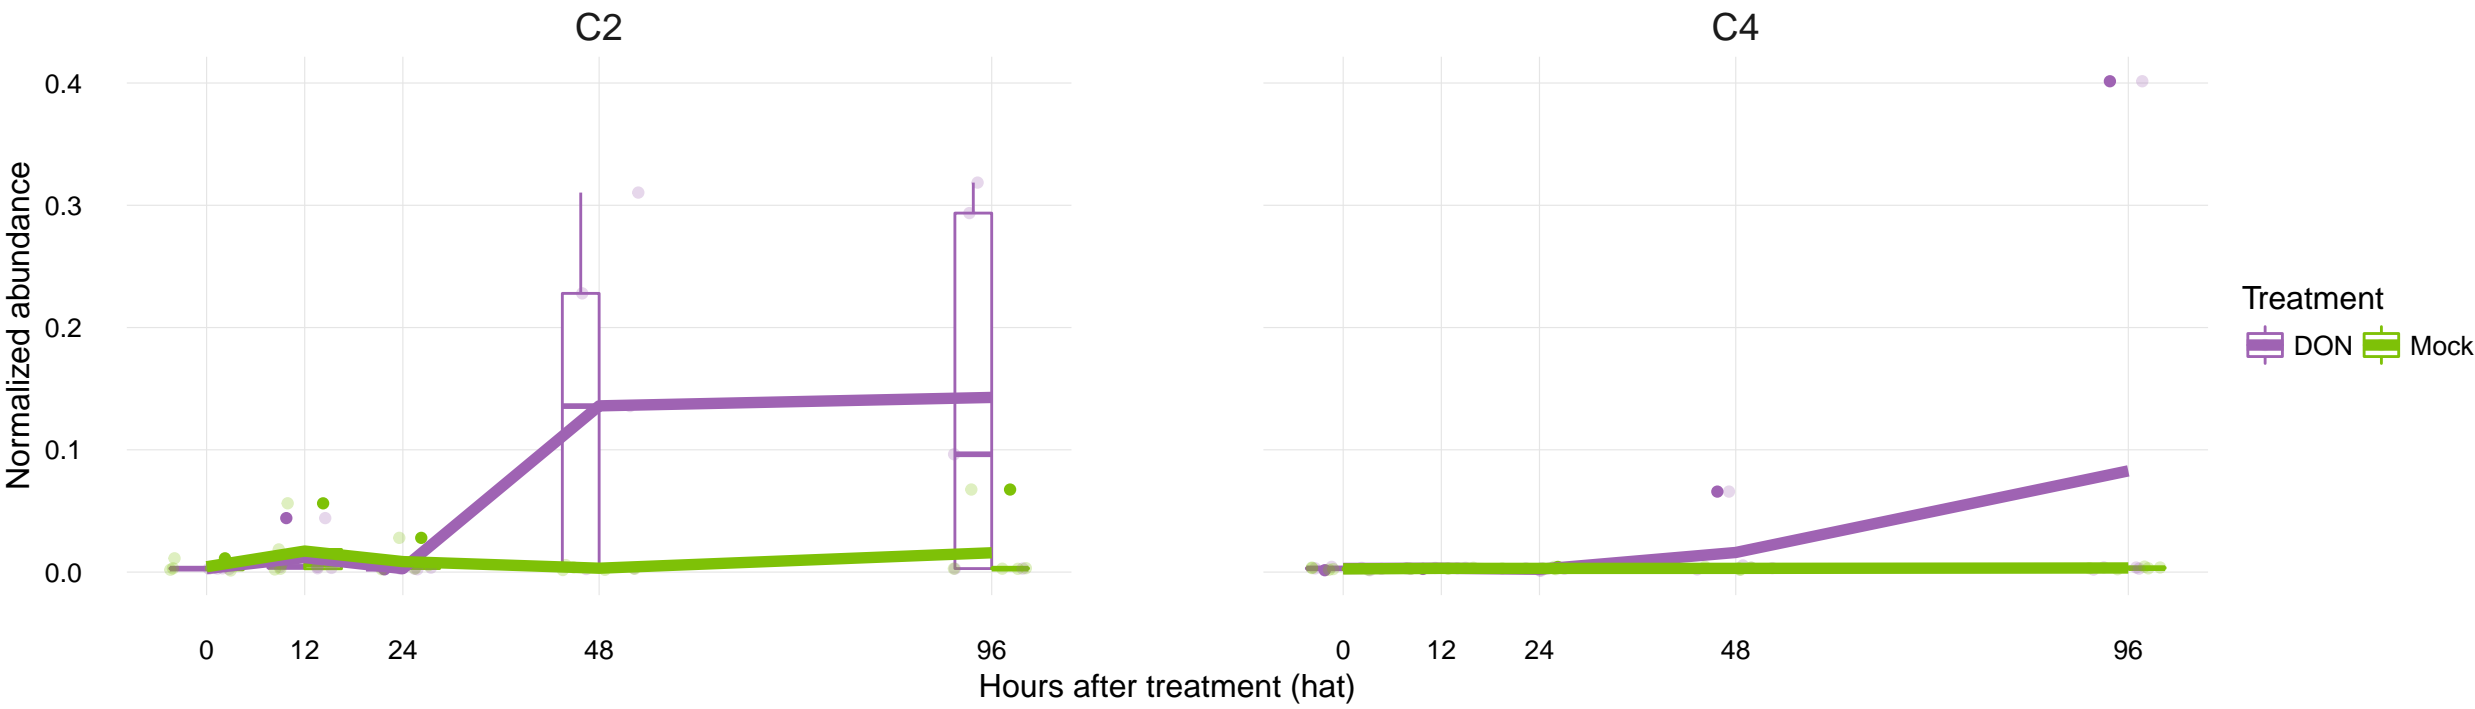

## DON, Mock; different genotypes

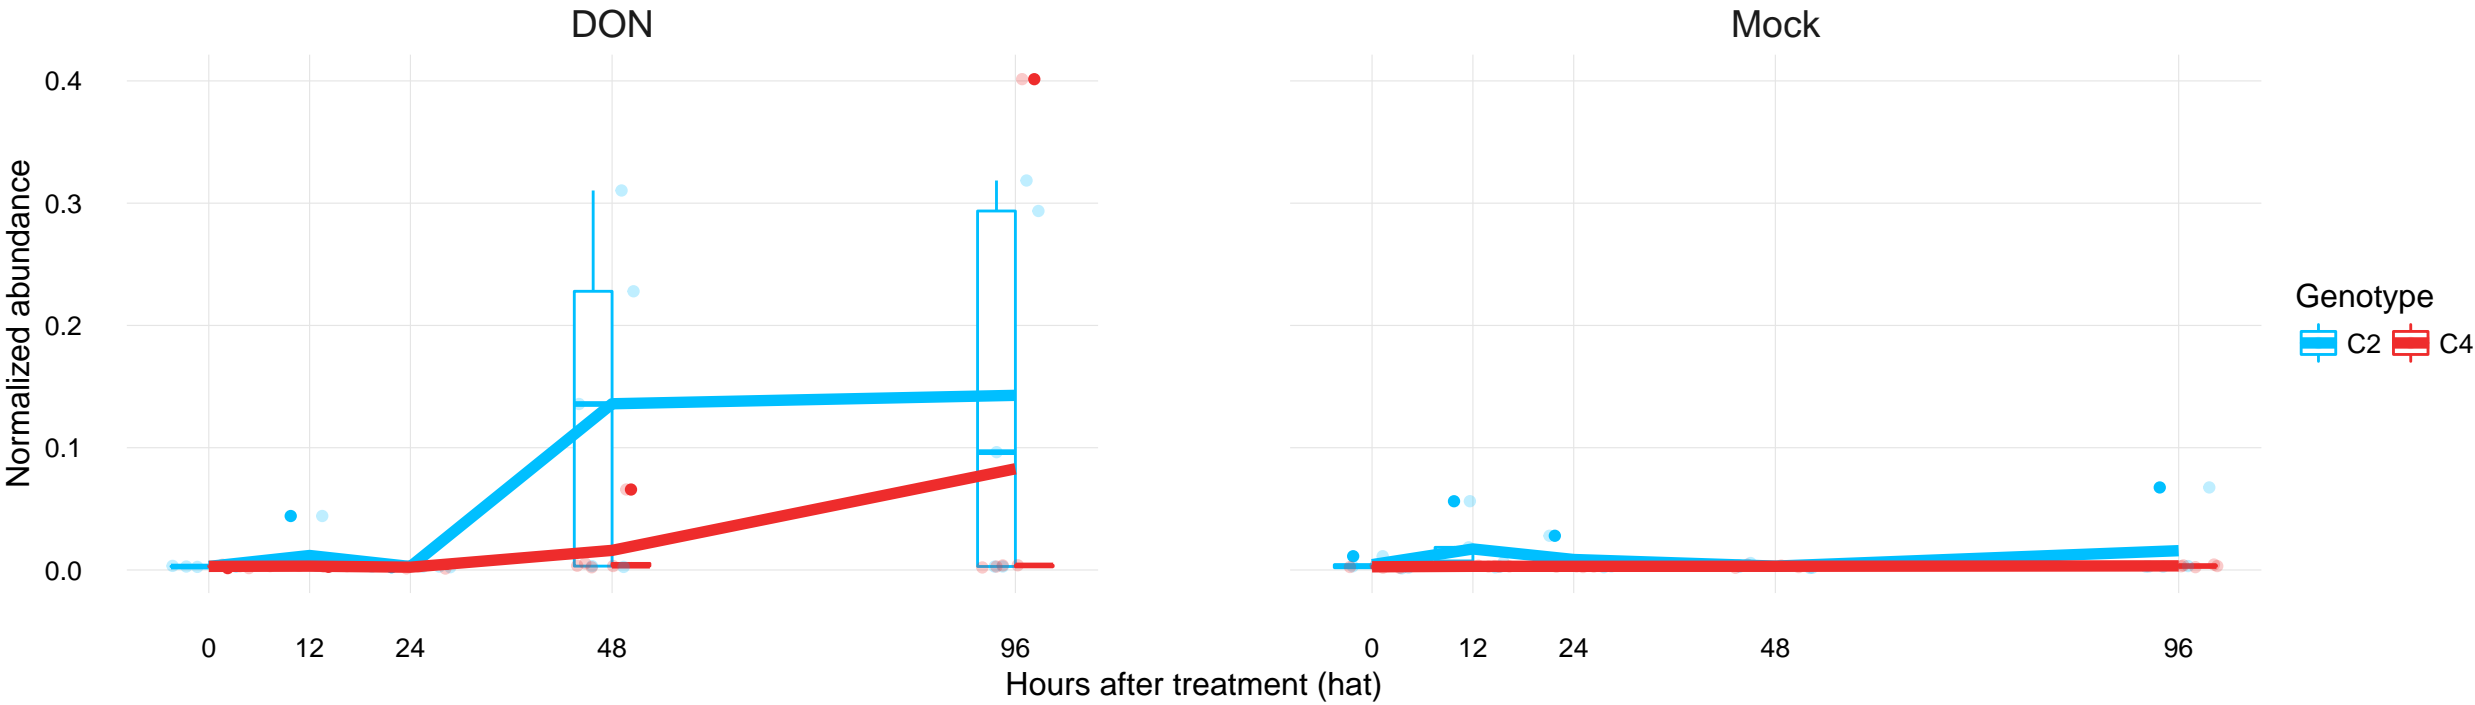

## CM, Remus; different treatments

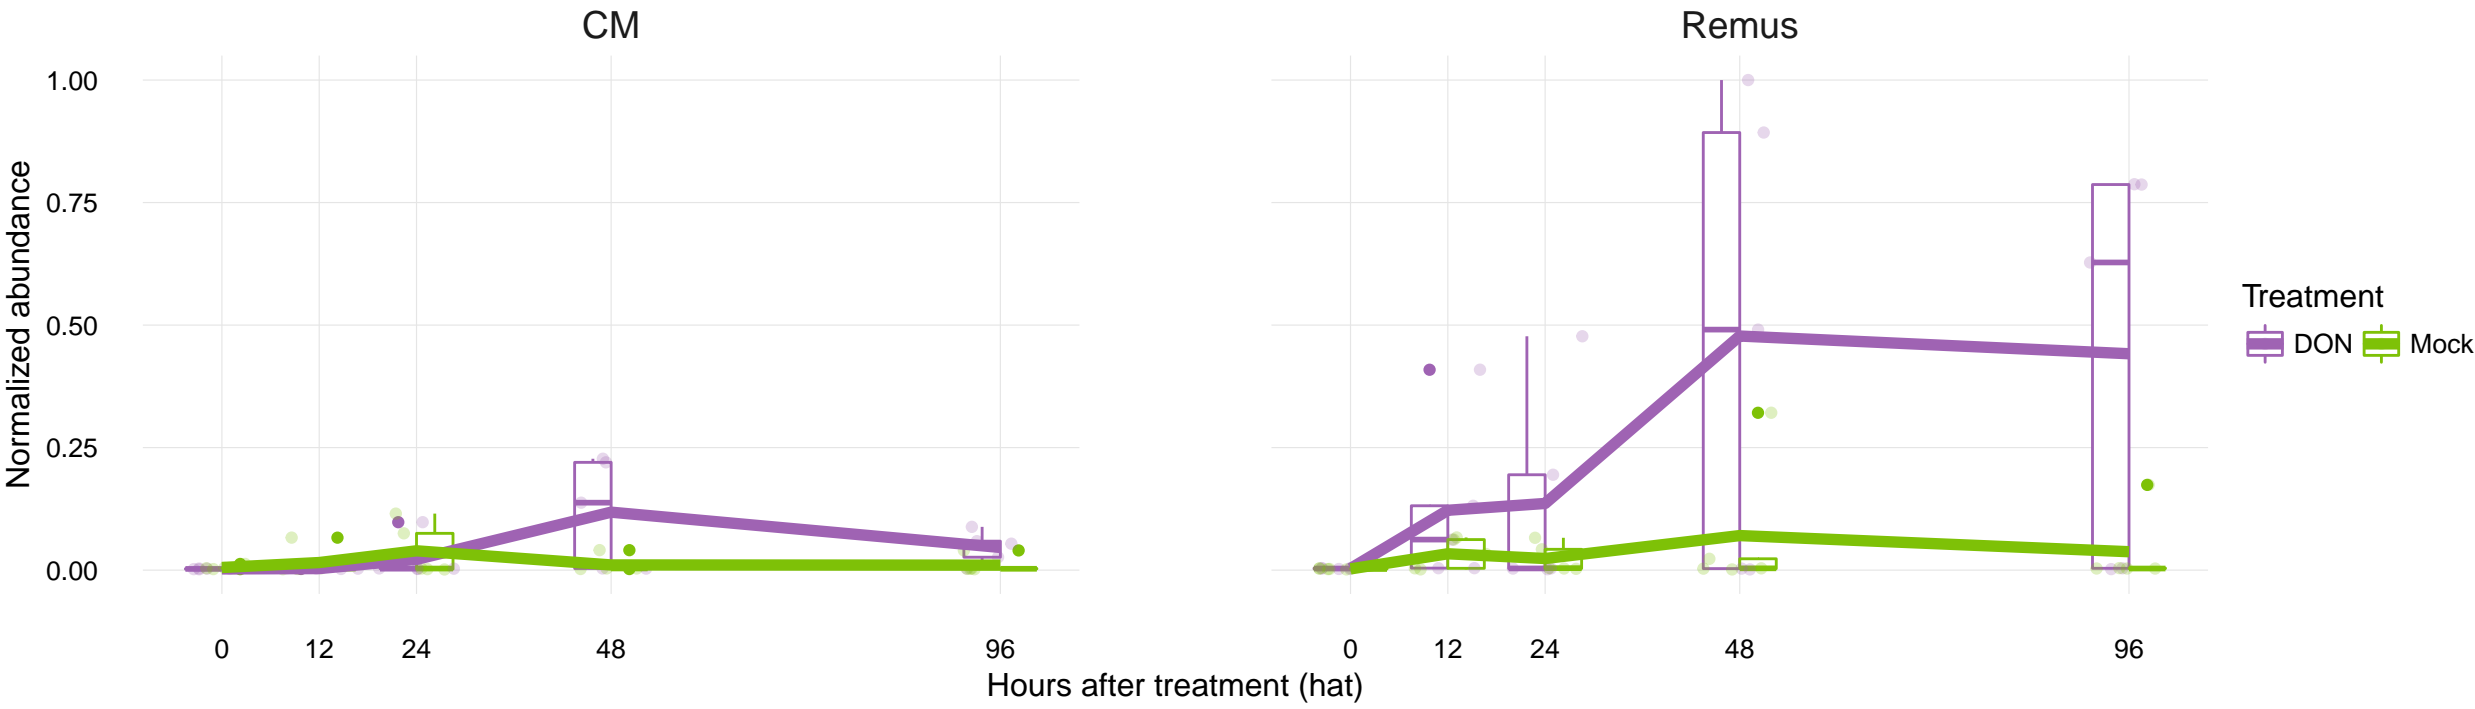

## DON, Mock; all four genotypes

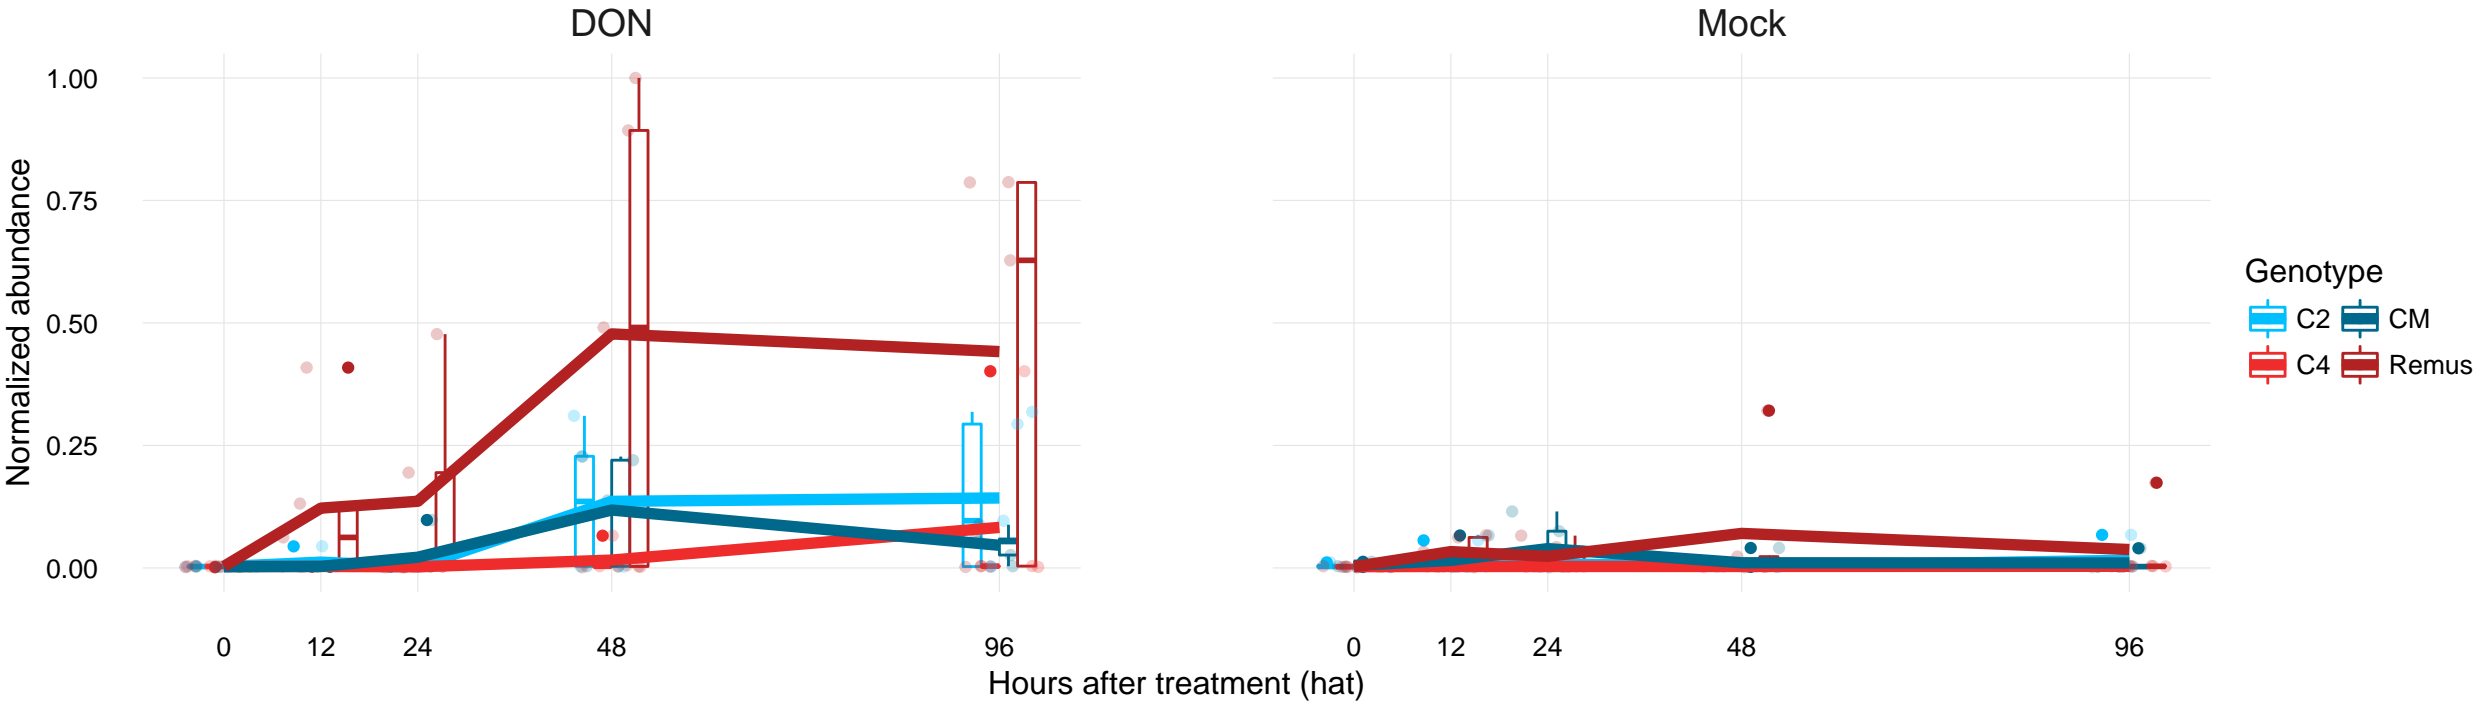

# A.100

Annotated as Flavonoid  
(21 database hits)

|                |                                                |
|----------------|------------------------------------------------|
| MZ             | 371.149                                        |
| RT             | 16.65 min                                      |
| Normalization  | Indirectly via surrogate<br>in the KPX samples |
| Cluster        | —                                              |
| Cn total / Phe | 21 /                                           |

## C2, C4; different treatments

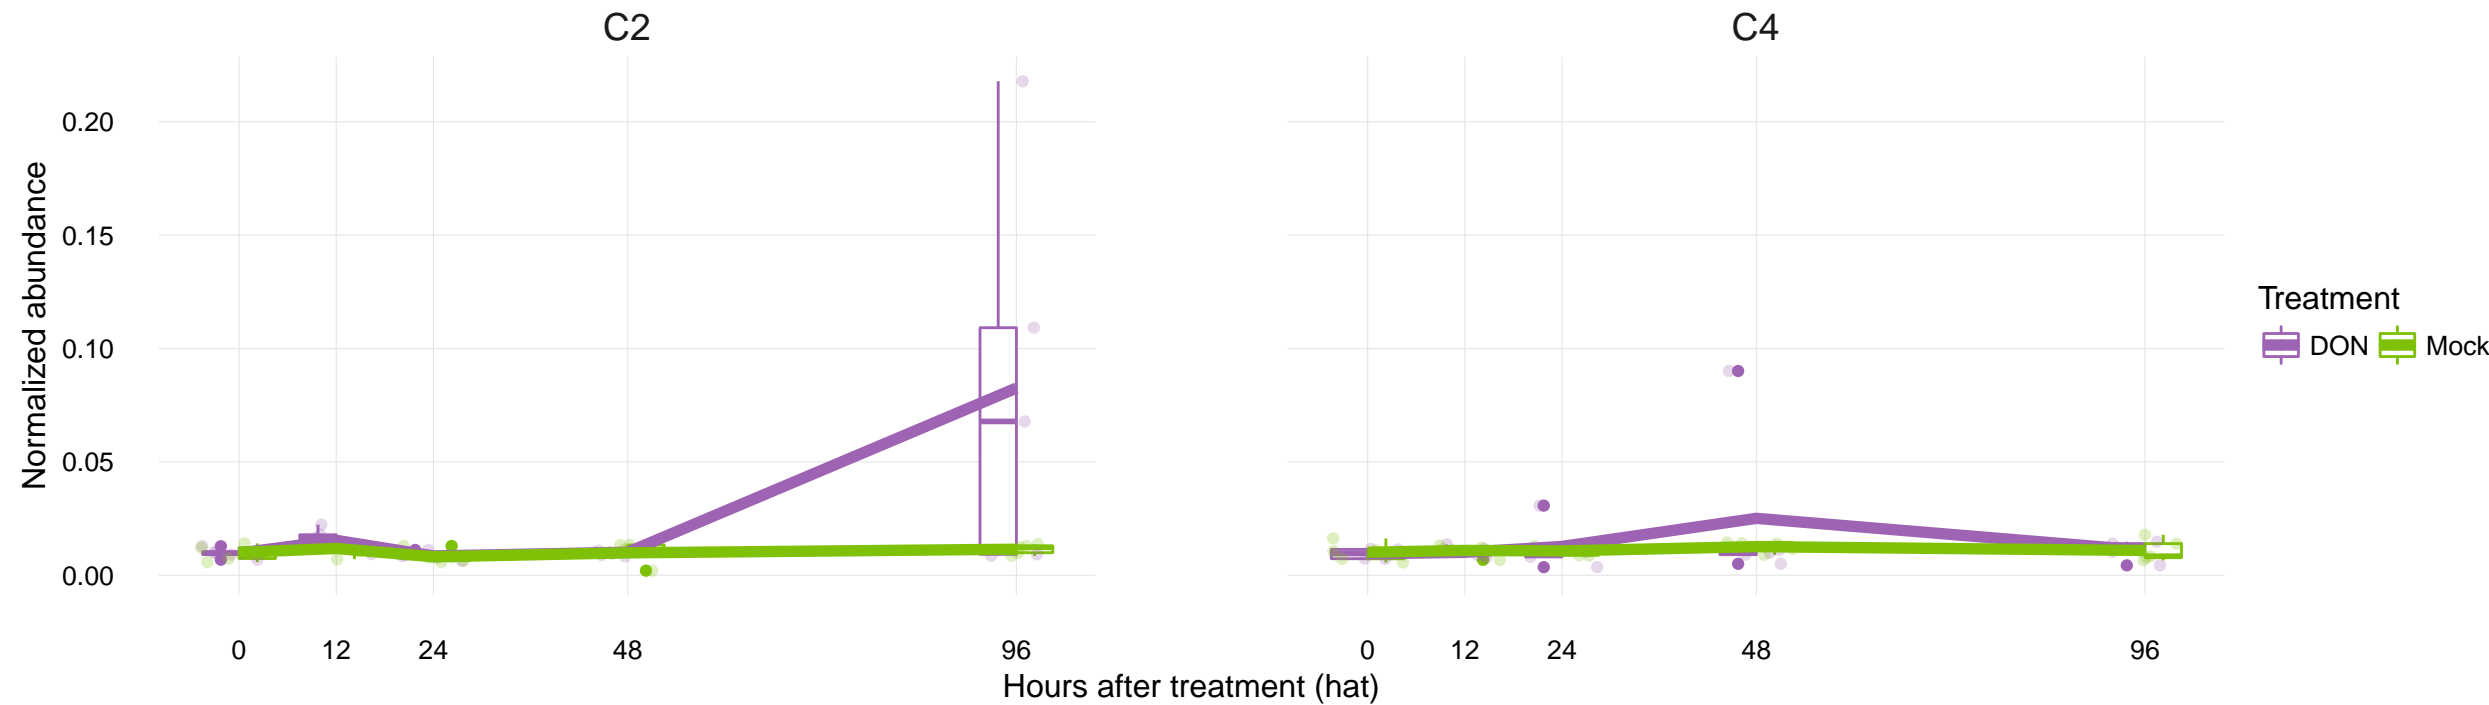

## DON, Mock; different genotypes

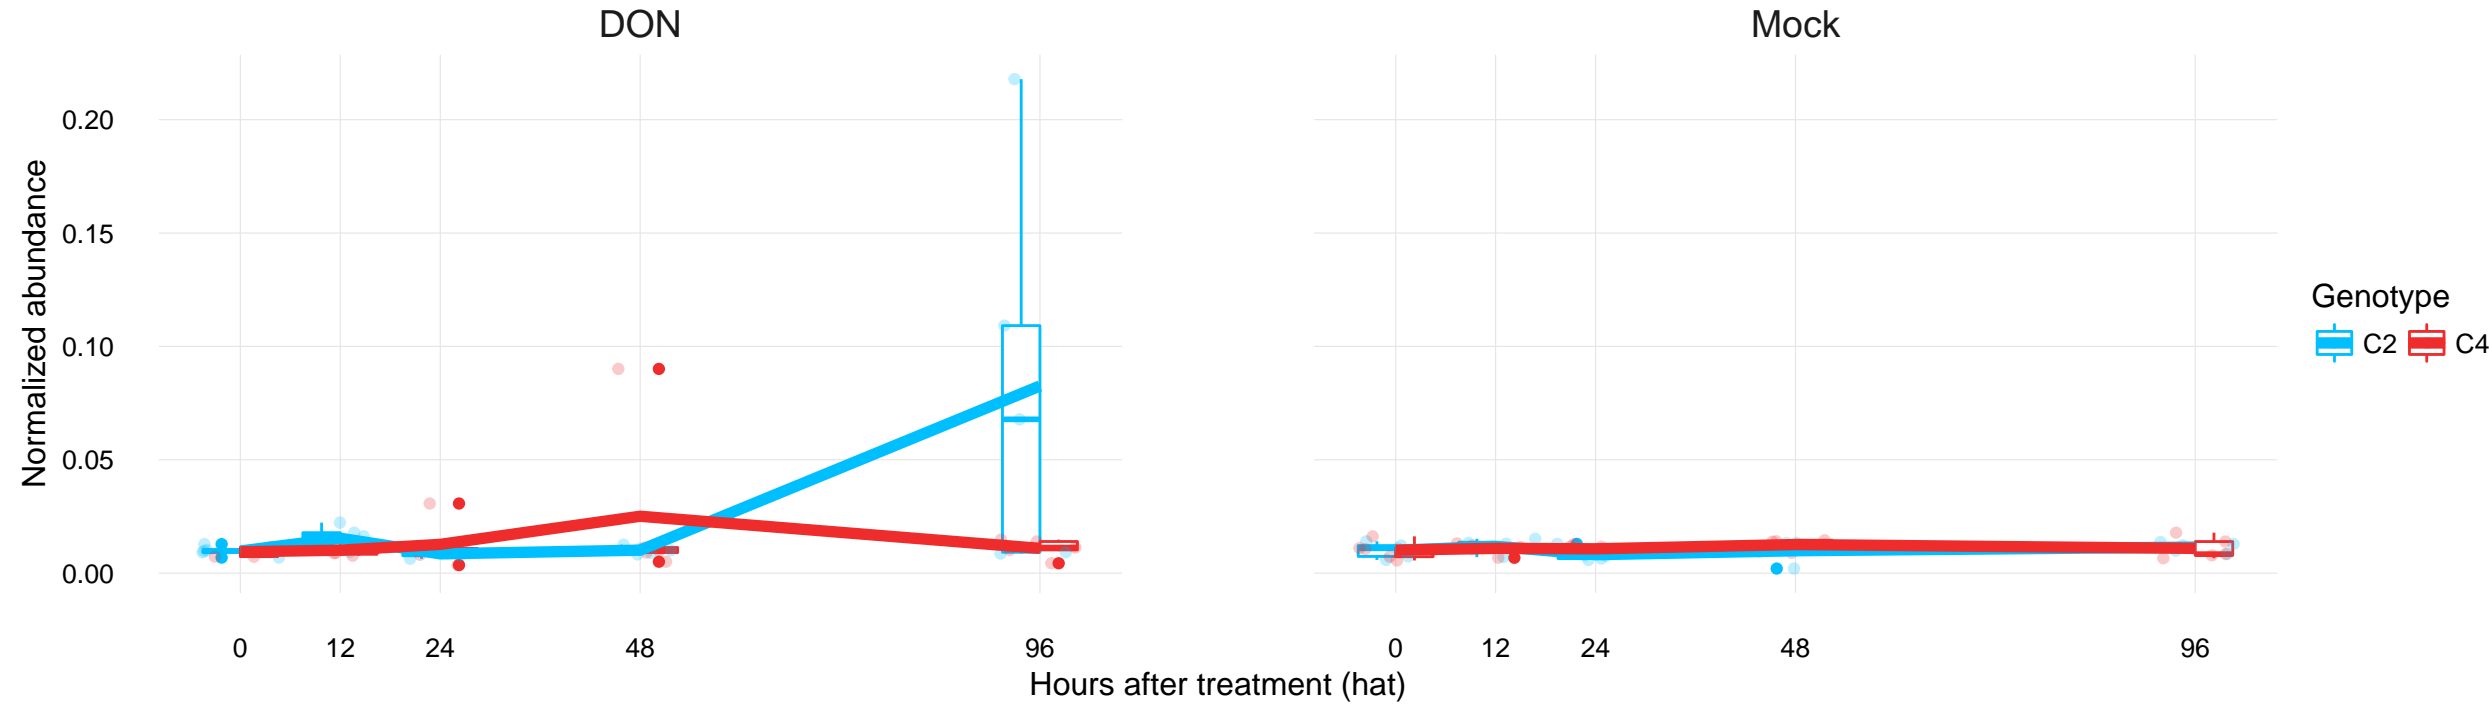

## CM, Remus; different treatments

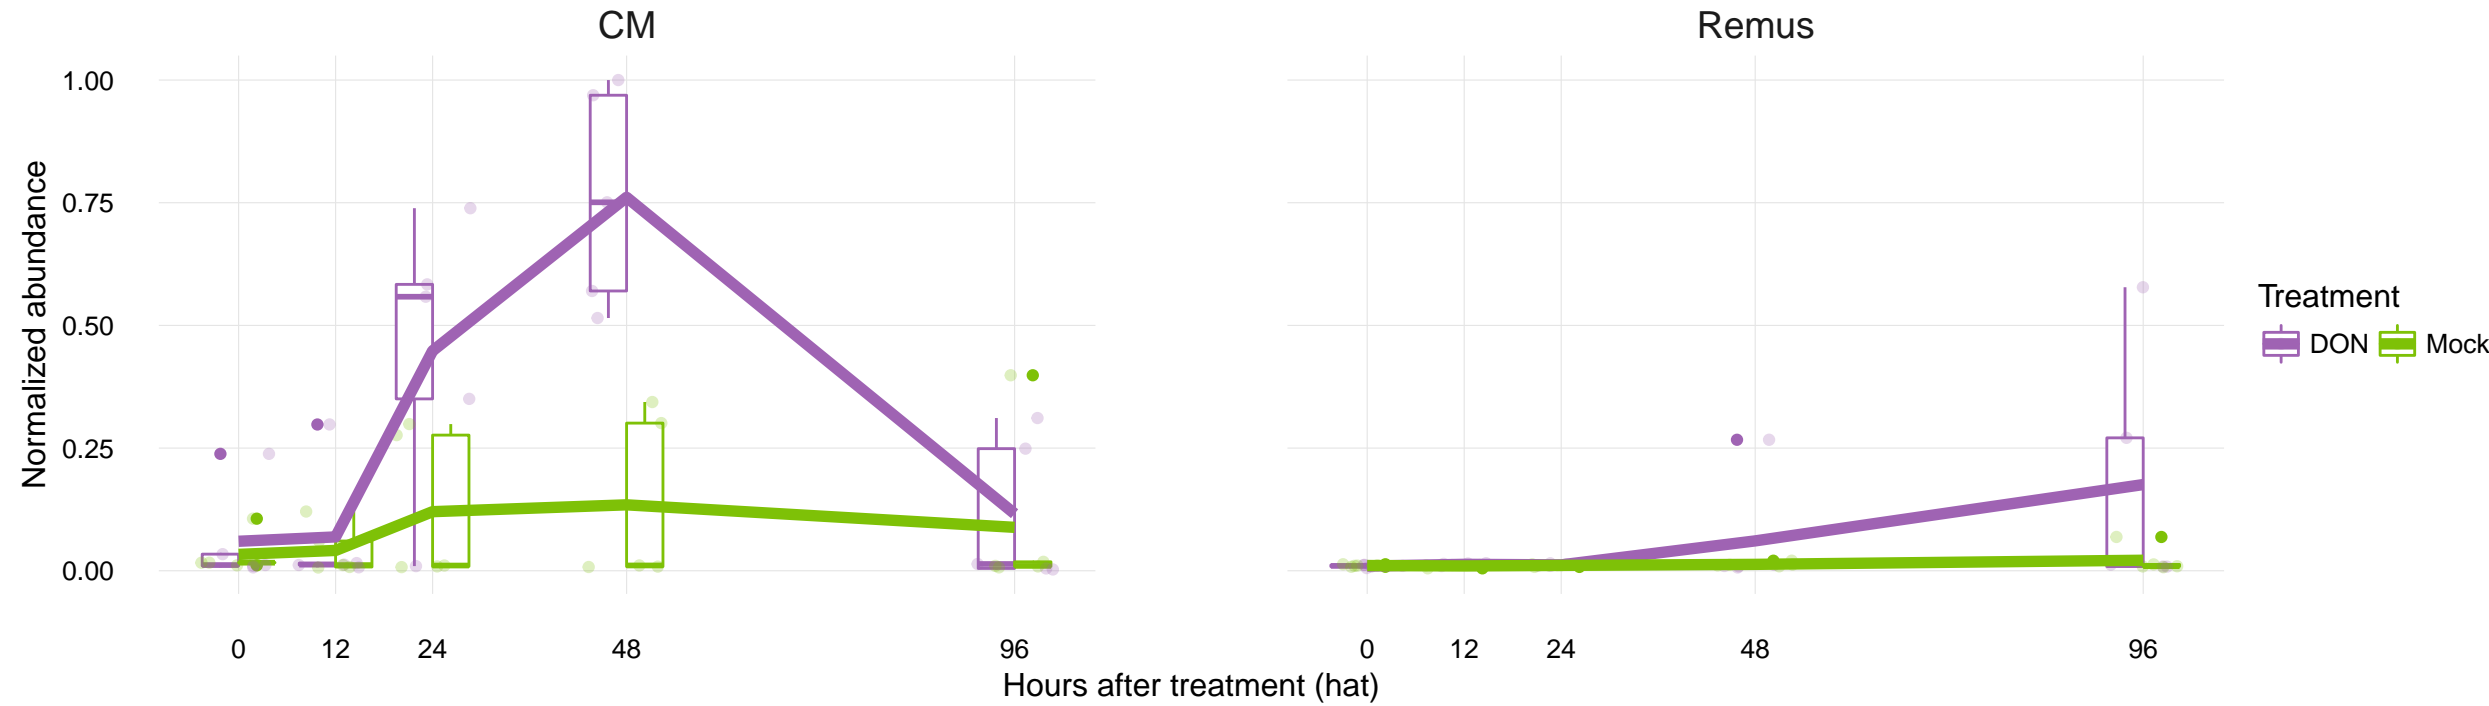

## DON, Mock; all four genotypes

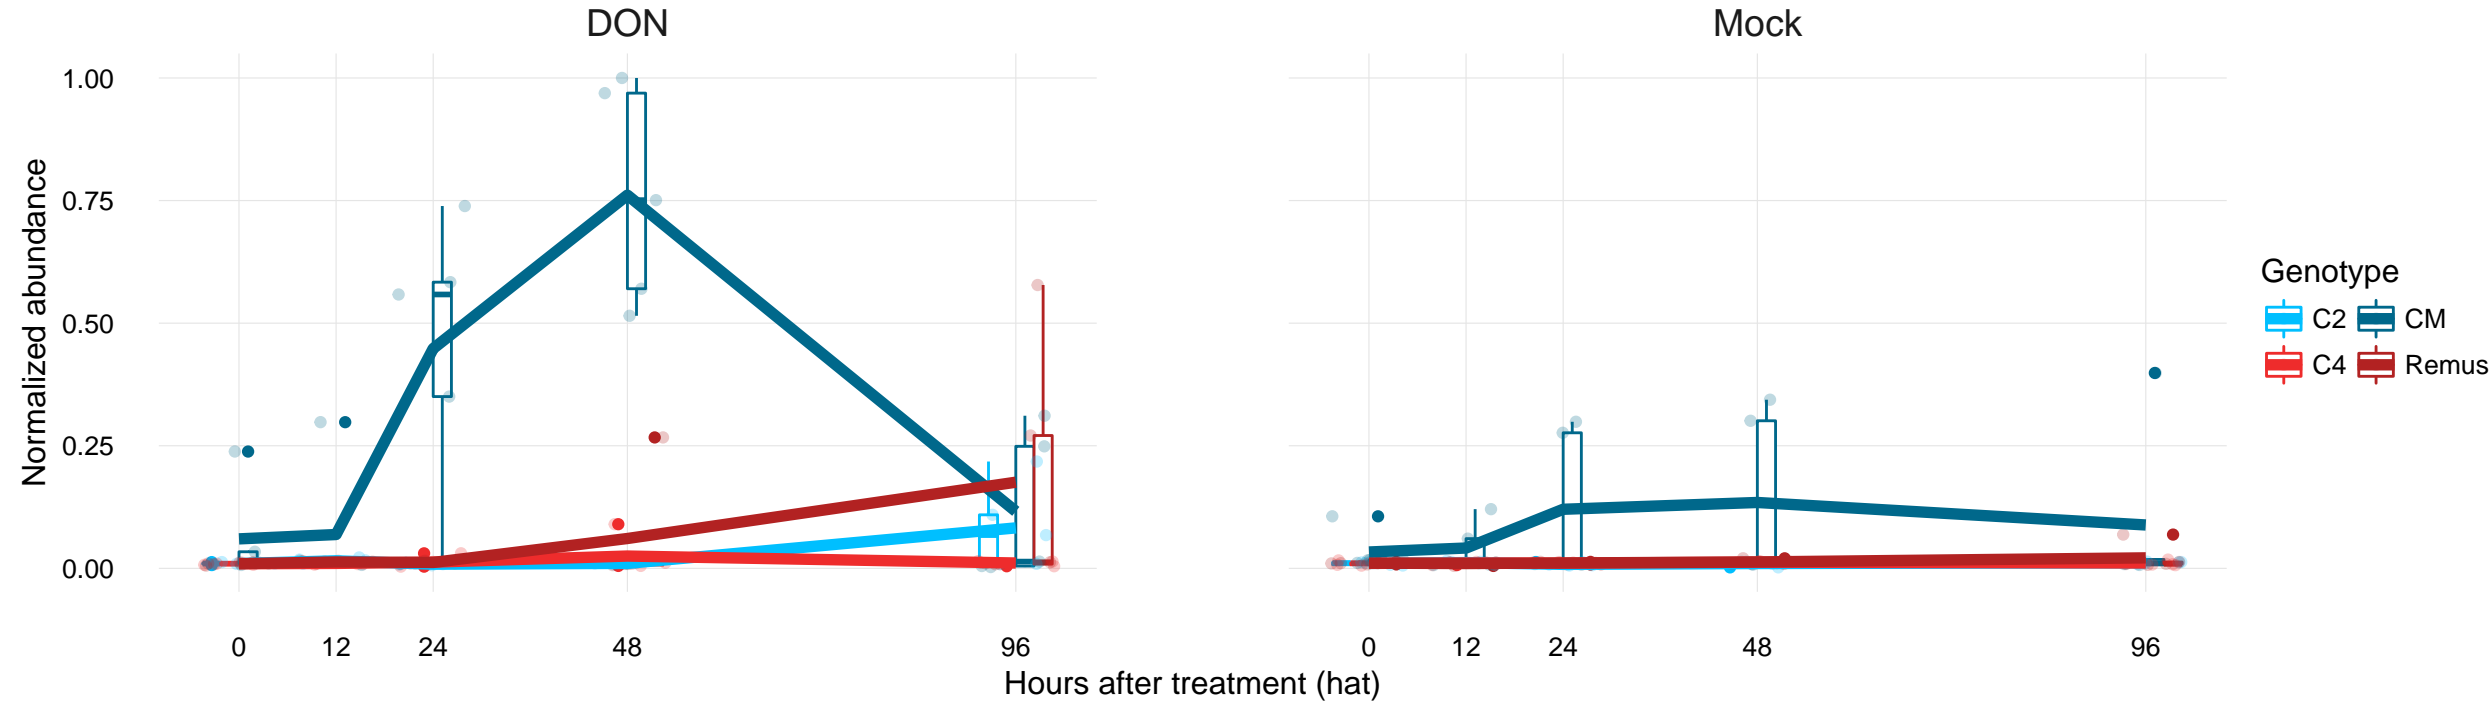

# A.71

Annotated as Flavonoid, Lignan or HCA derivative  
(15 database hits)

|                |                                                |
|----------------|------------------------------------------------|
| MZ             | 359.1492                                       |
| RT             | 13.64 min                                      |
| Normalization  | Indirectly via surrogate<br>in the KPX samples |
| Cluster        | –                                              |
| Cn total / Phe | 20 / 9                                         |

## C2, C4; different treatments

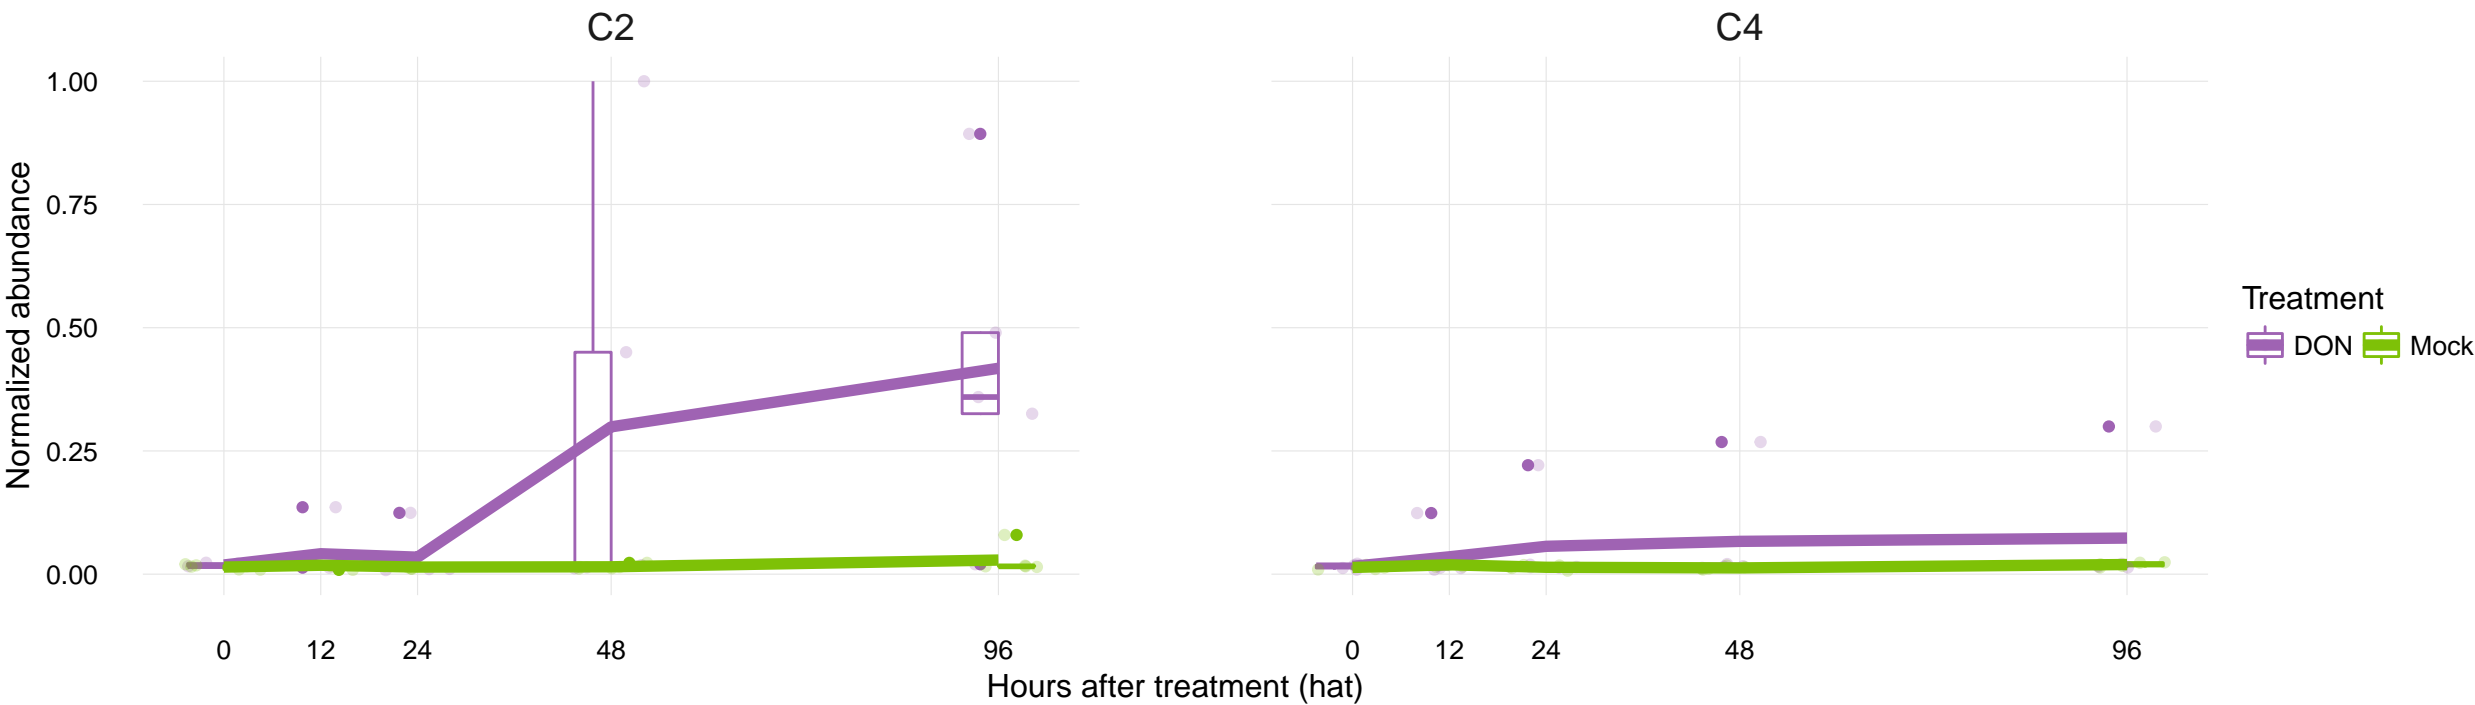

## DON, Mock; different genotypes

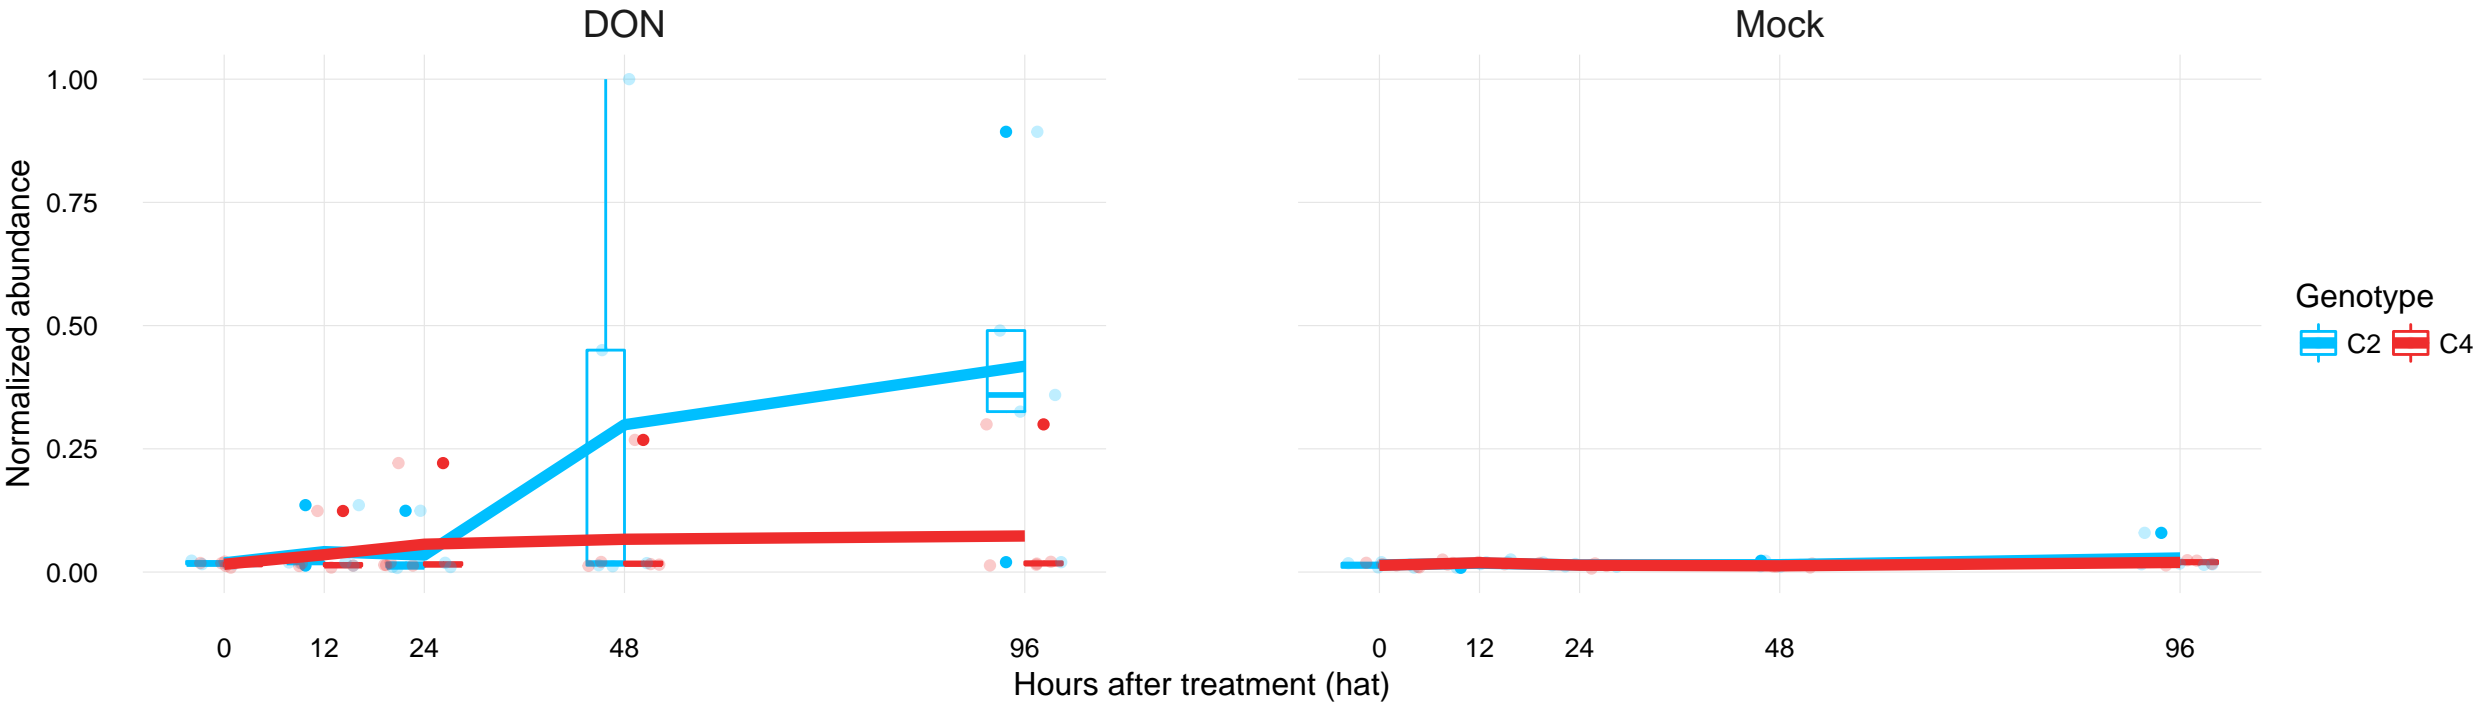

## CM, Remus; different treatments

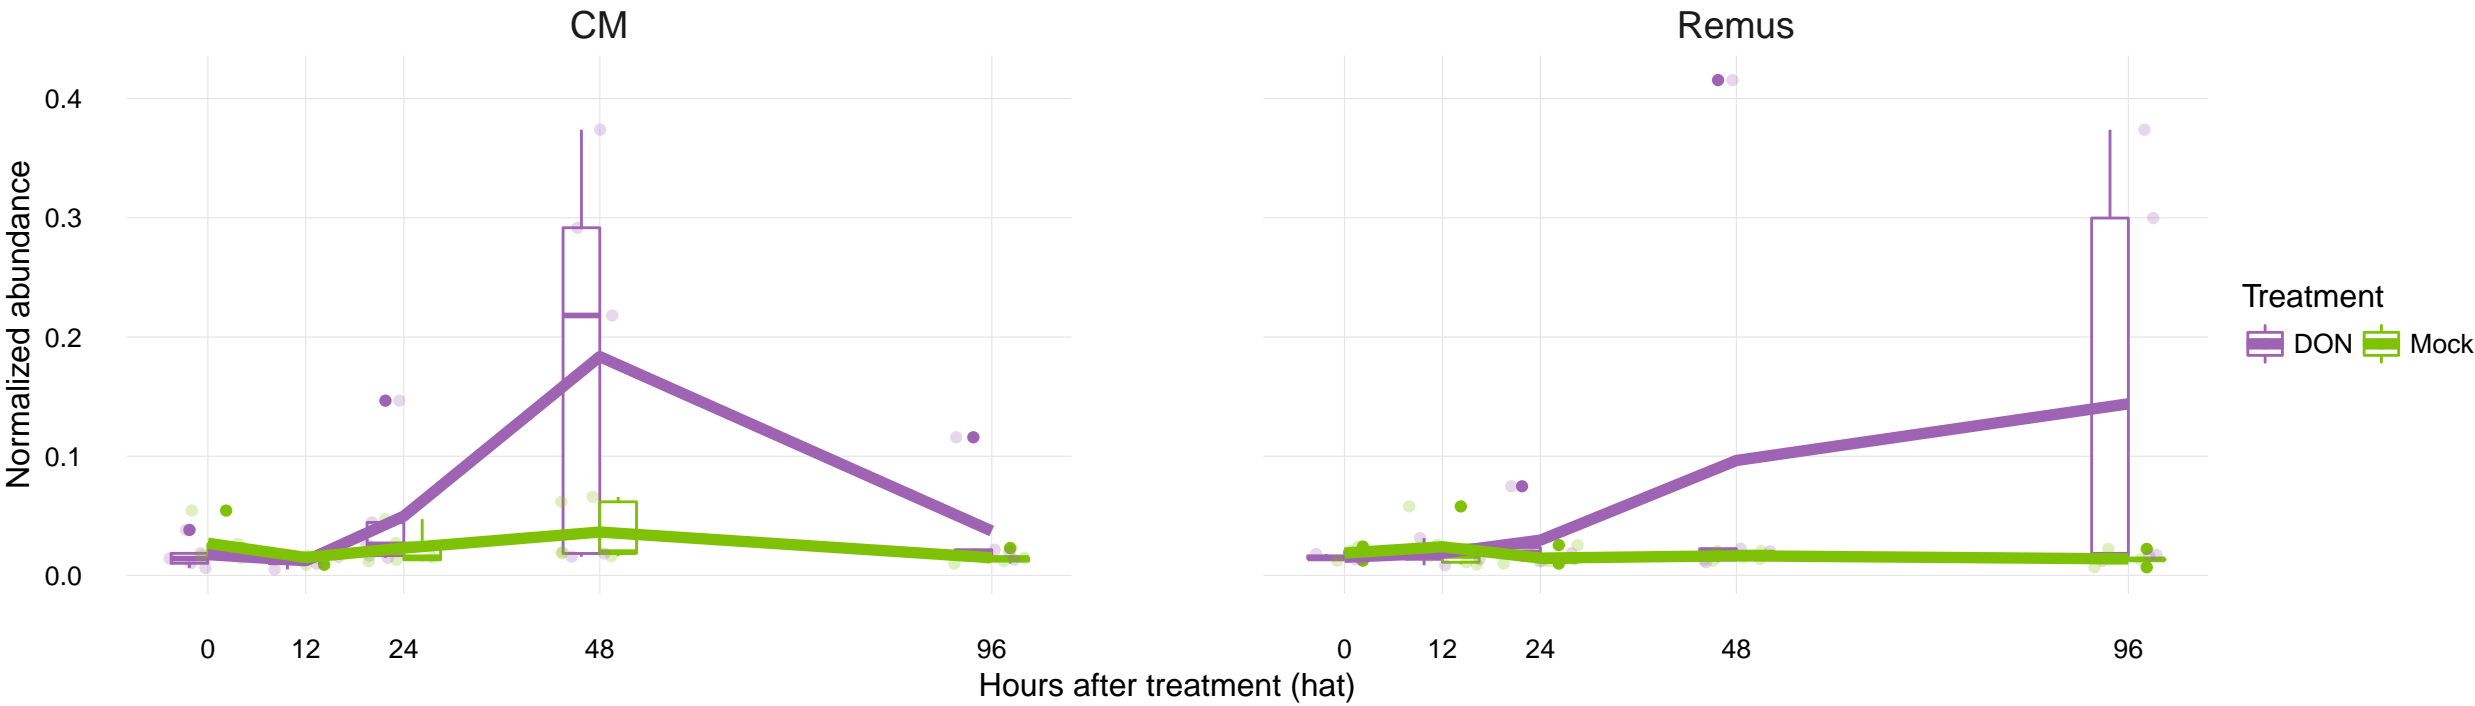

## DON, Mock; all four genotypes

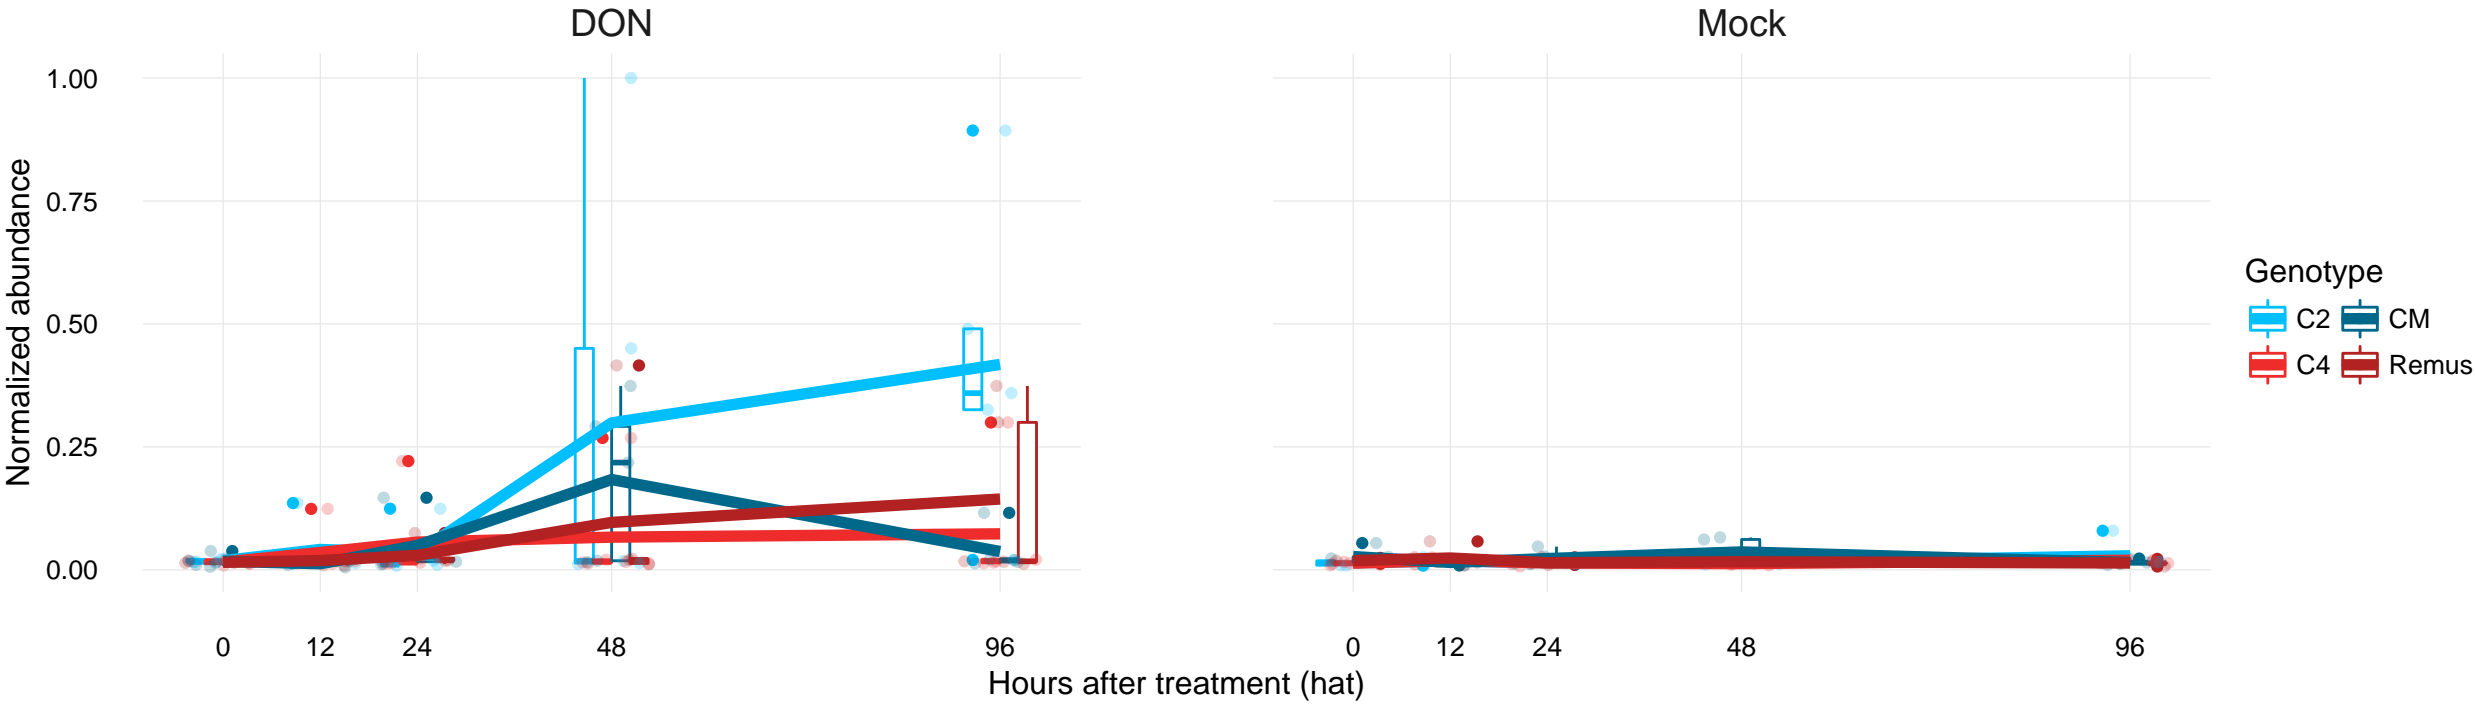



# A.121

Annotated as Flavonoid (GlcF)  
(17 database hits)

|                |                          |
|----------------|--------------------------|
| MZ             | 773.1922                 |
| RT             | 19.63 min                |
| Normalization  | Directly via KPX samples |
| Cluster        | –                        |
| Cn total / Phe | 36 /                     |

## C2, C4; different treatments

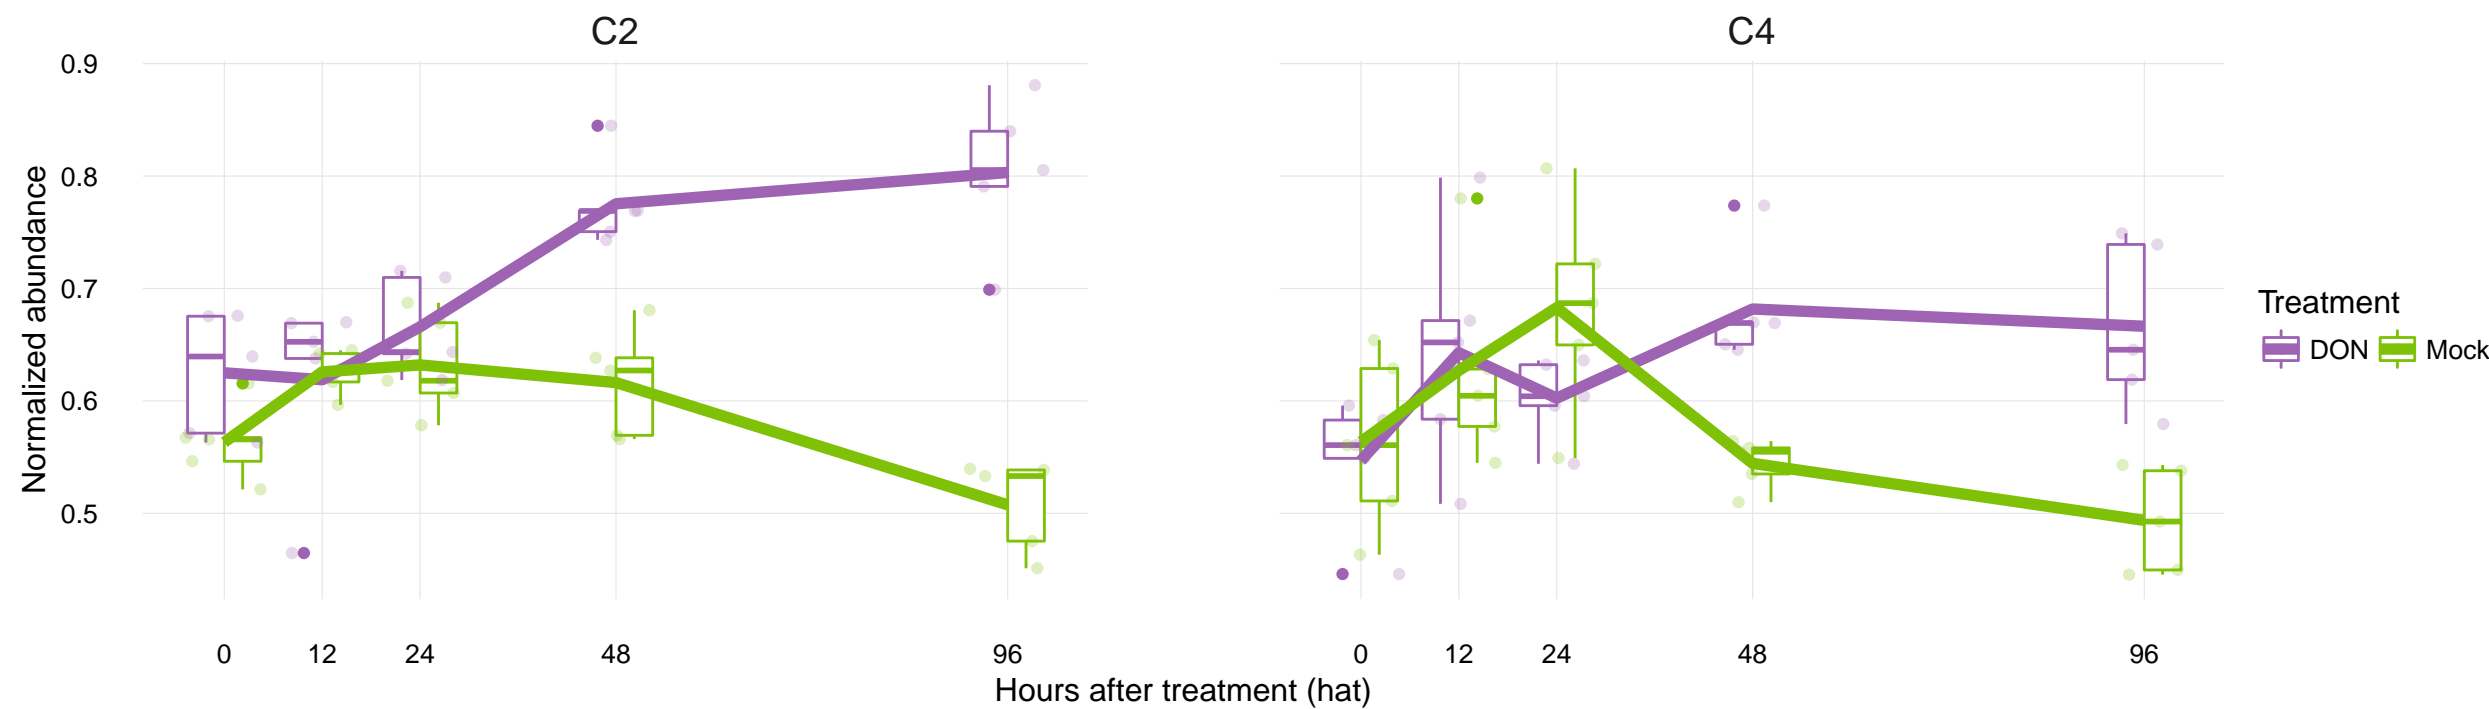

## DON, Mock; different genotypes

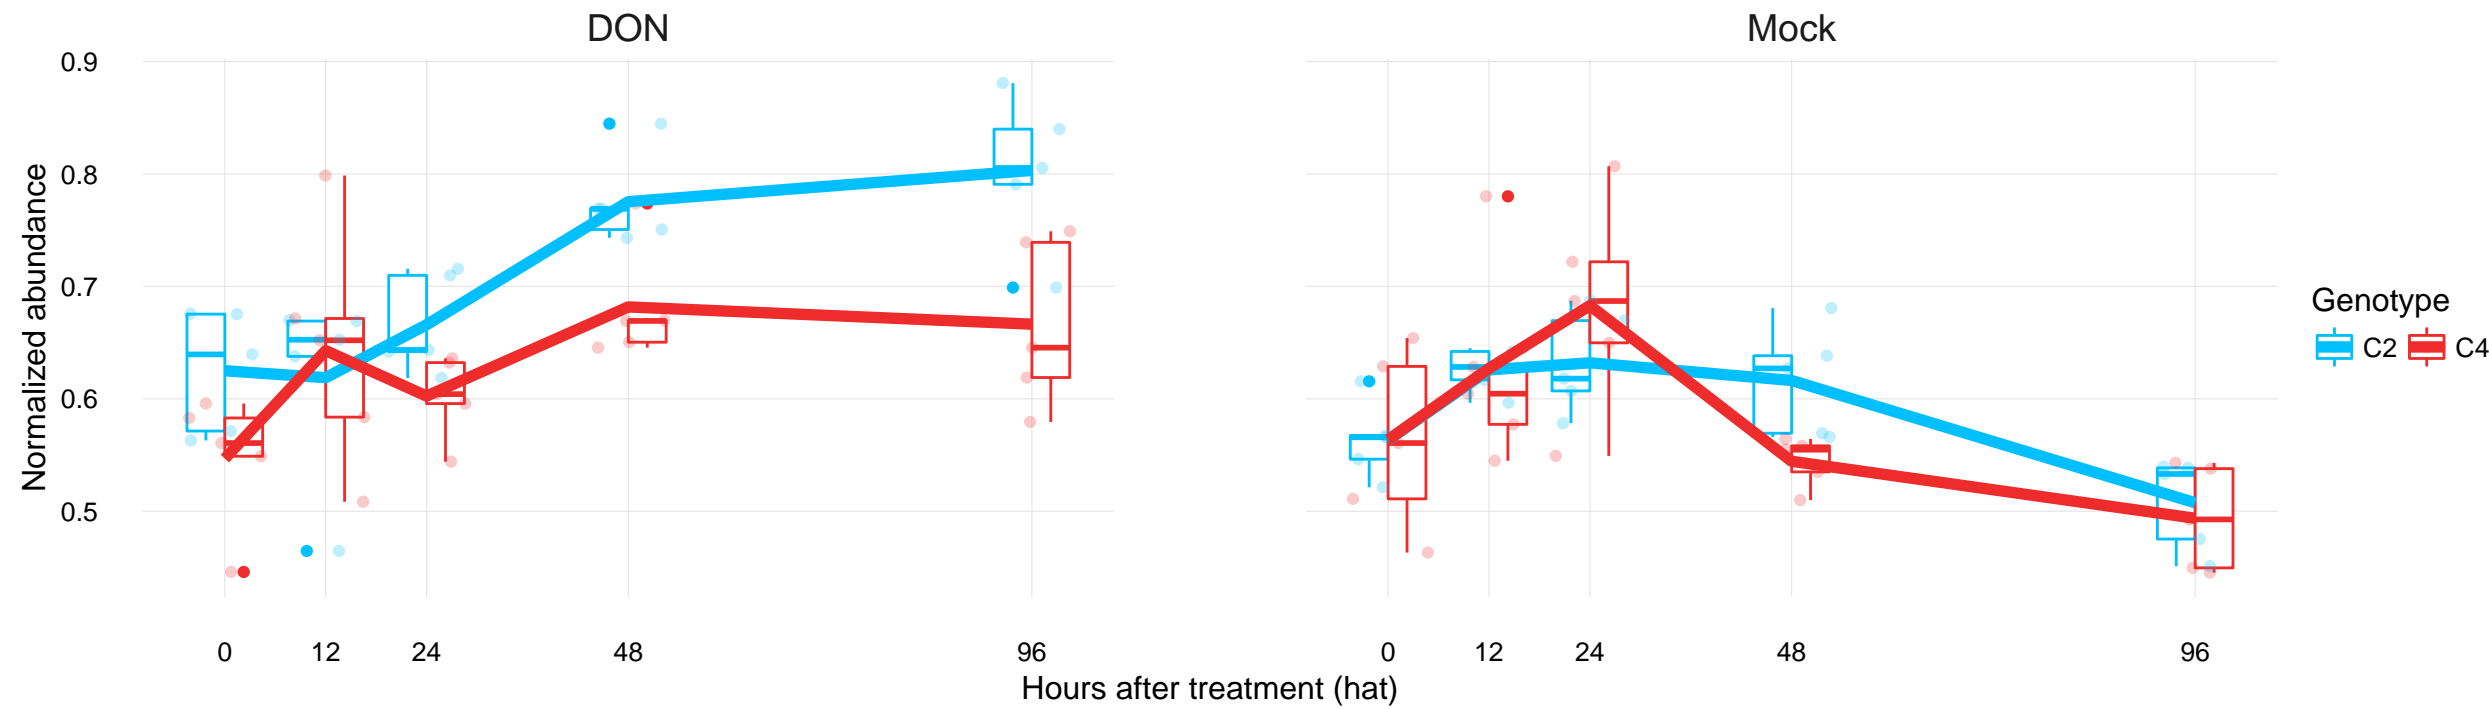

## CM, Remus; different treatments

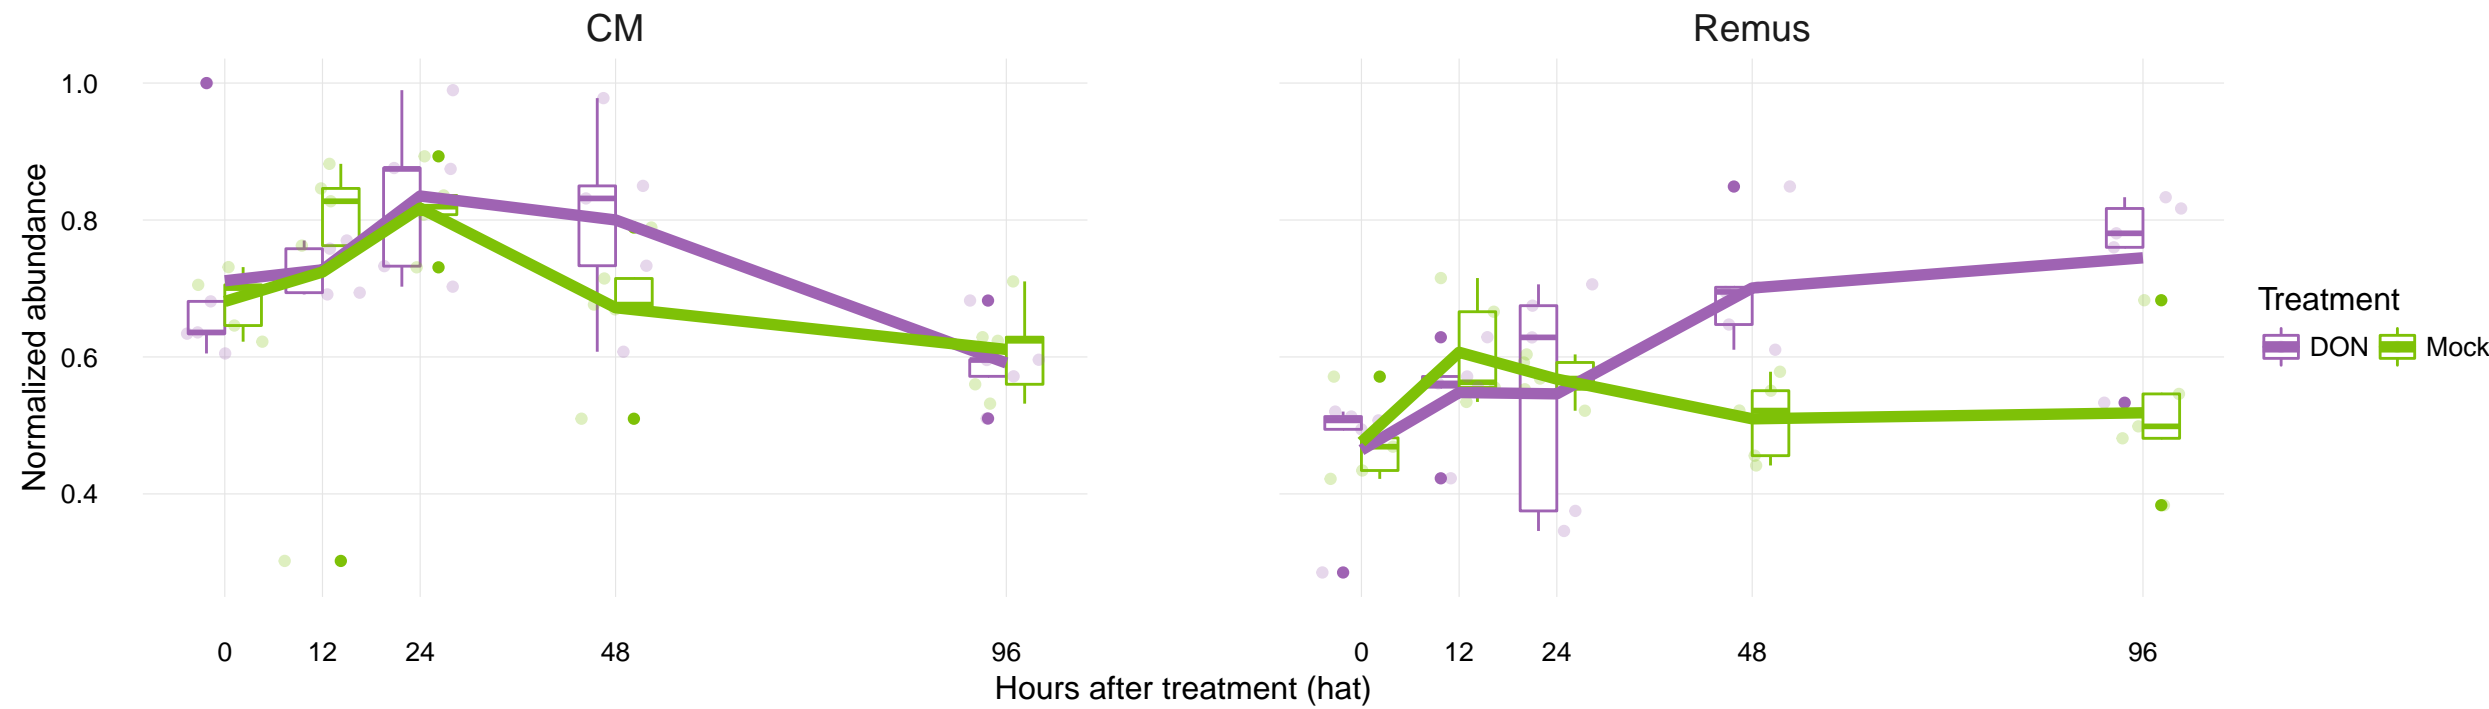

## DON, Mock; all four genotypes

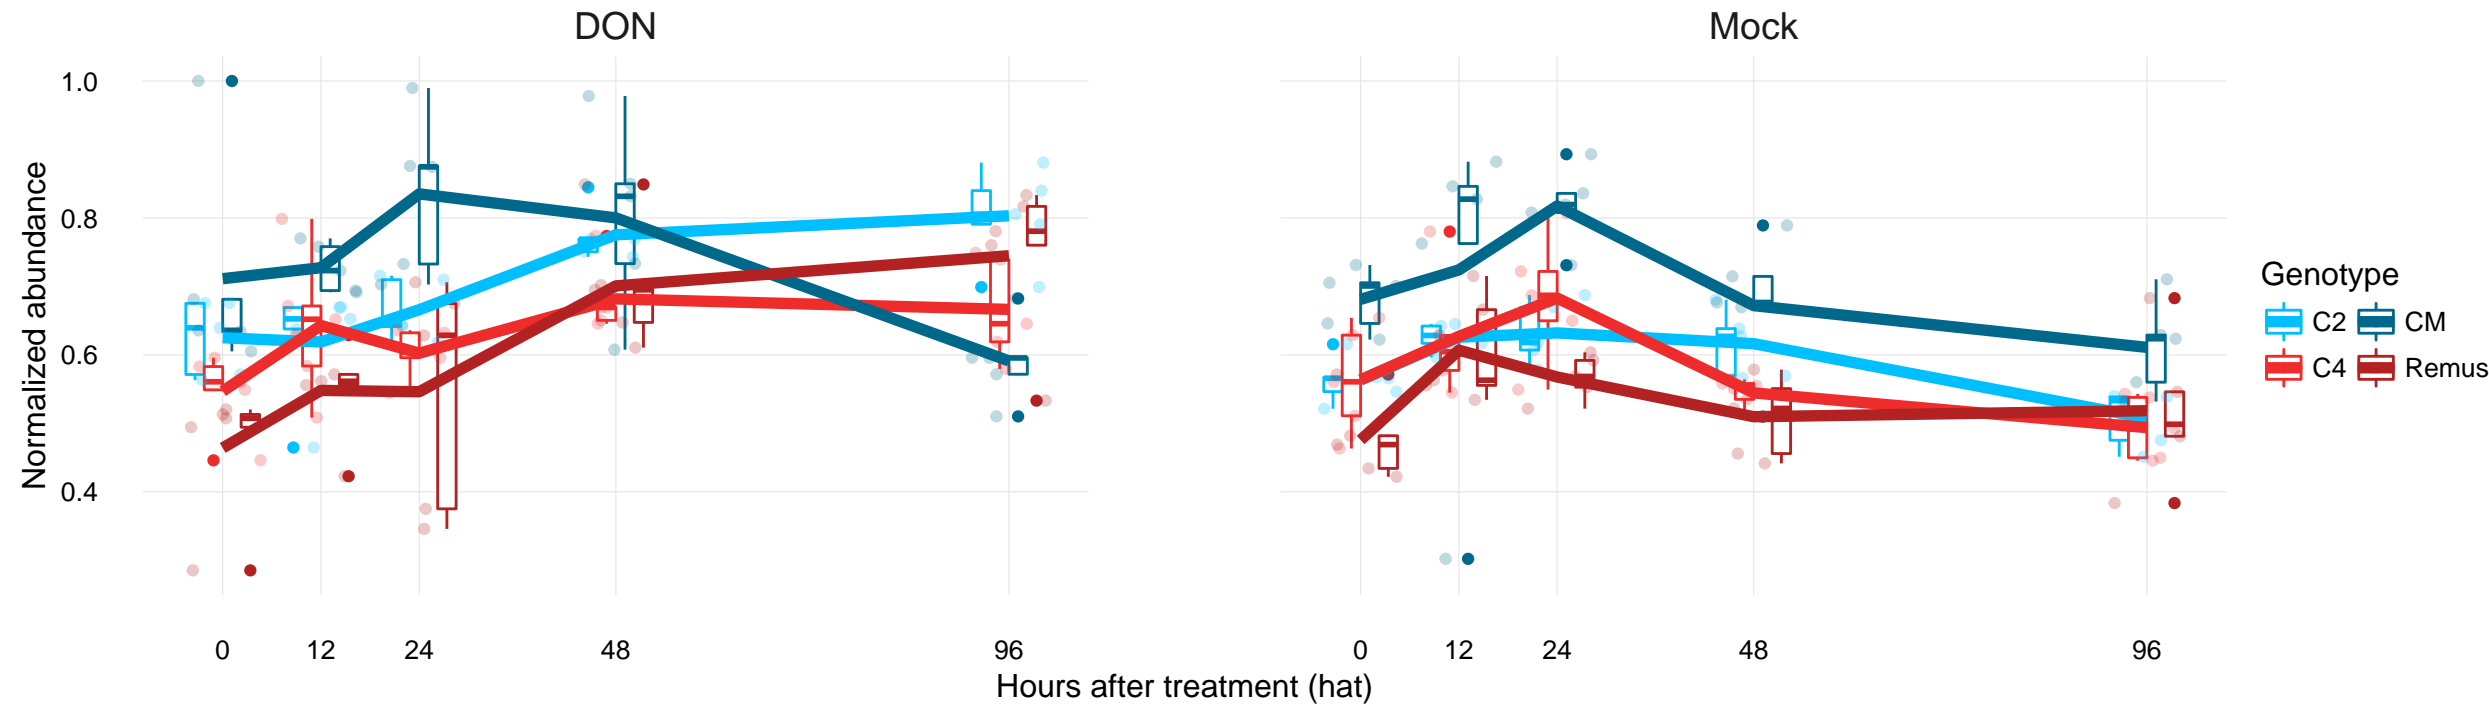

# U.12

Unknown Phe-derived wheat-metabolite

|                |                          |
|----------------|--------------------------|
| MZ             | 579.1345                 |
| RT             | 18.66 min                |
| Normalization  | Directly via KPX samples |
| Cluster        | –                        |
| Cn total / Phe | 26 / 18                  |

## C2, C4; different treatments

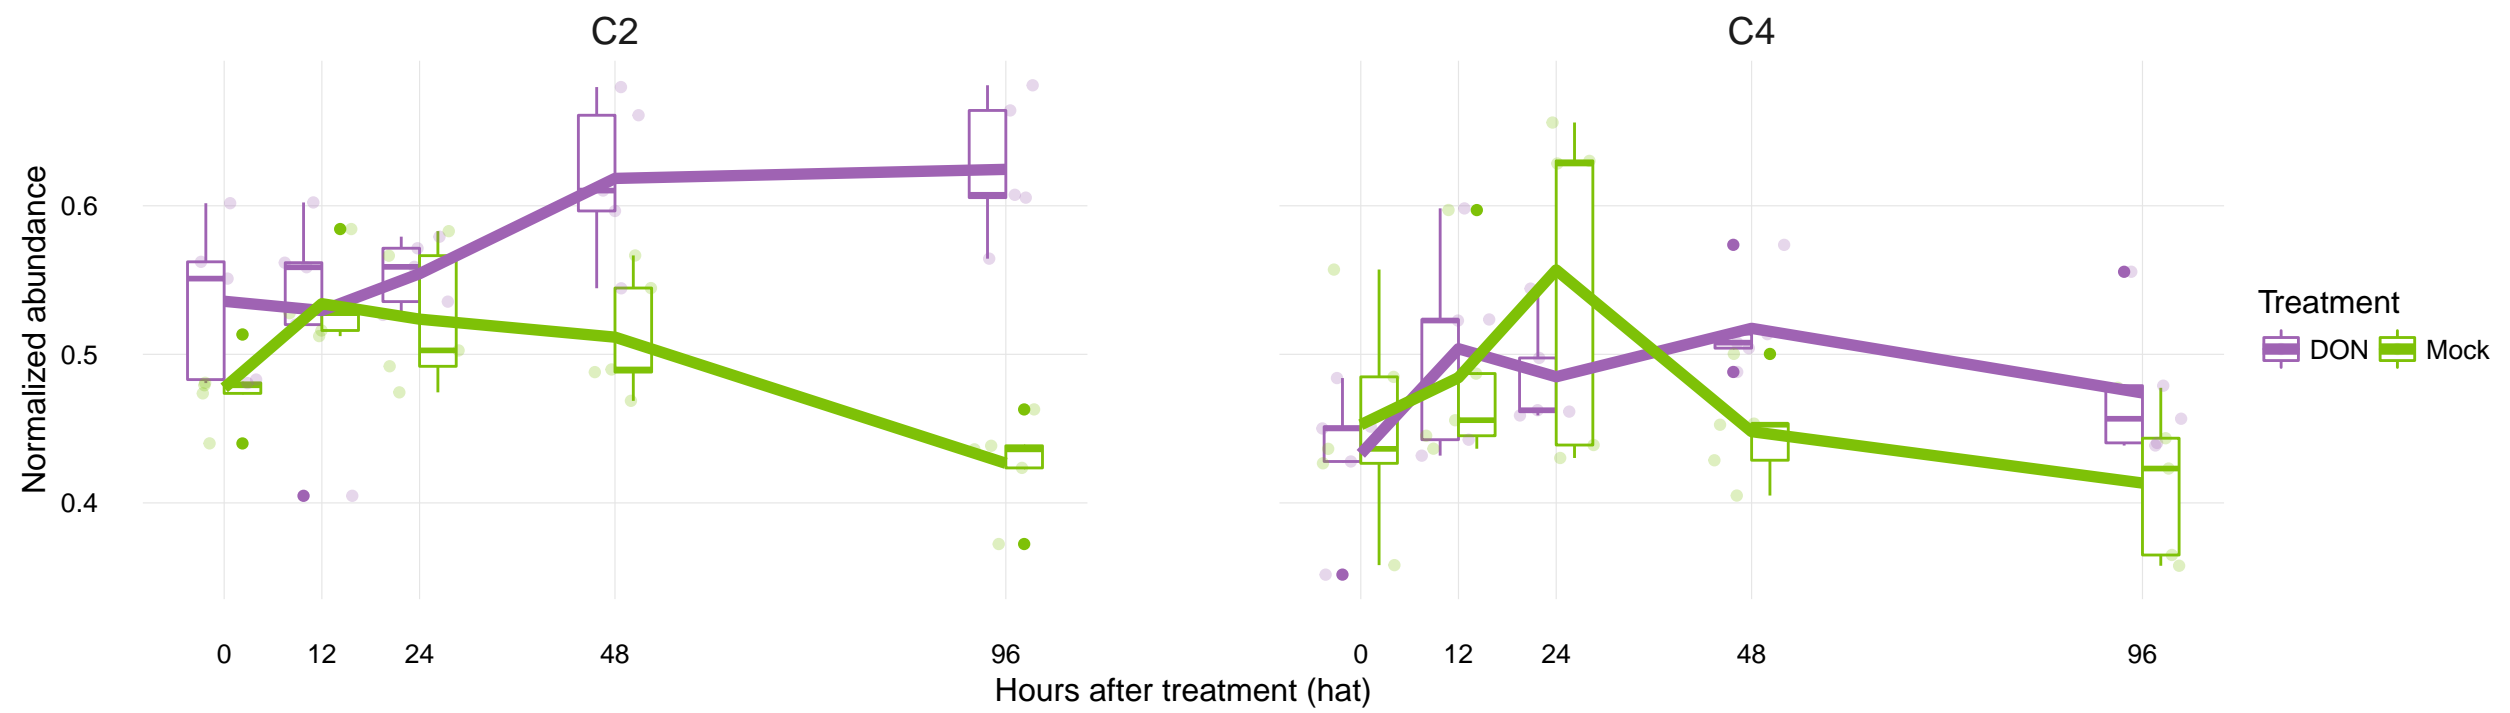

## DON, Mock; different genotypes

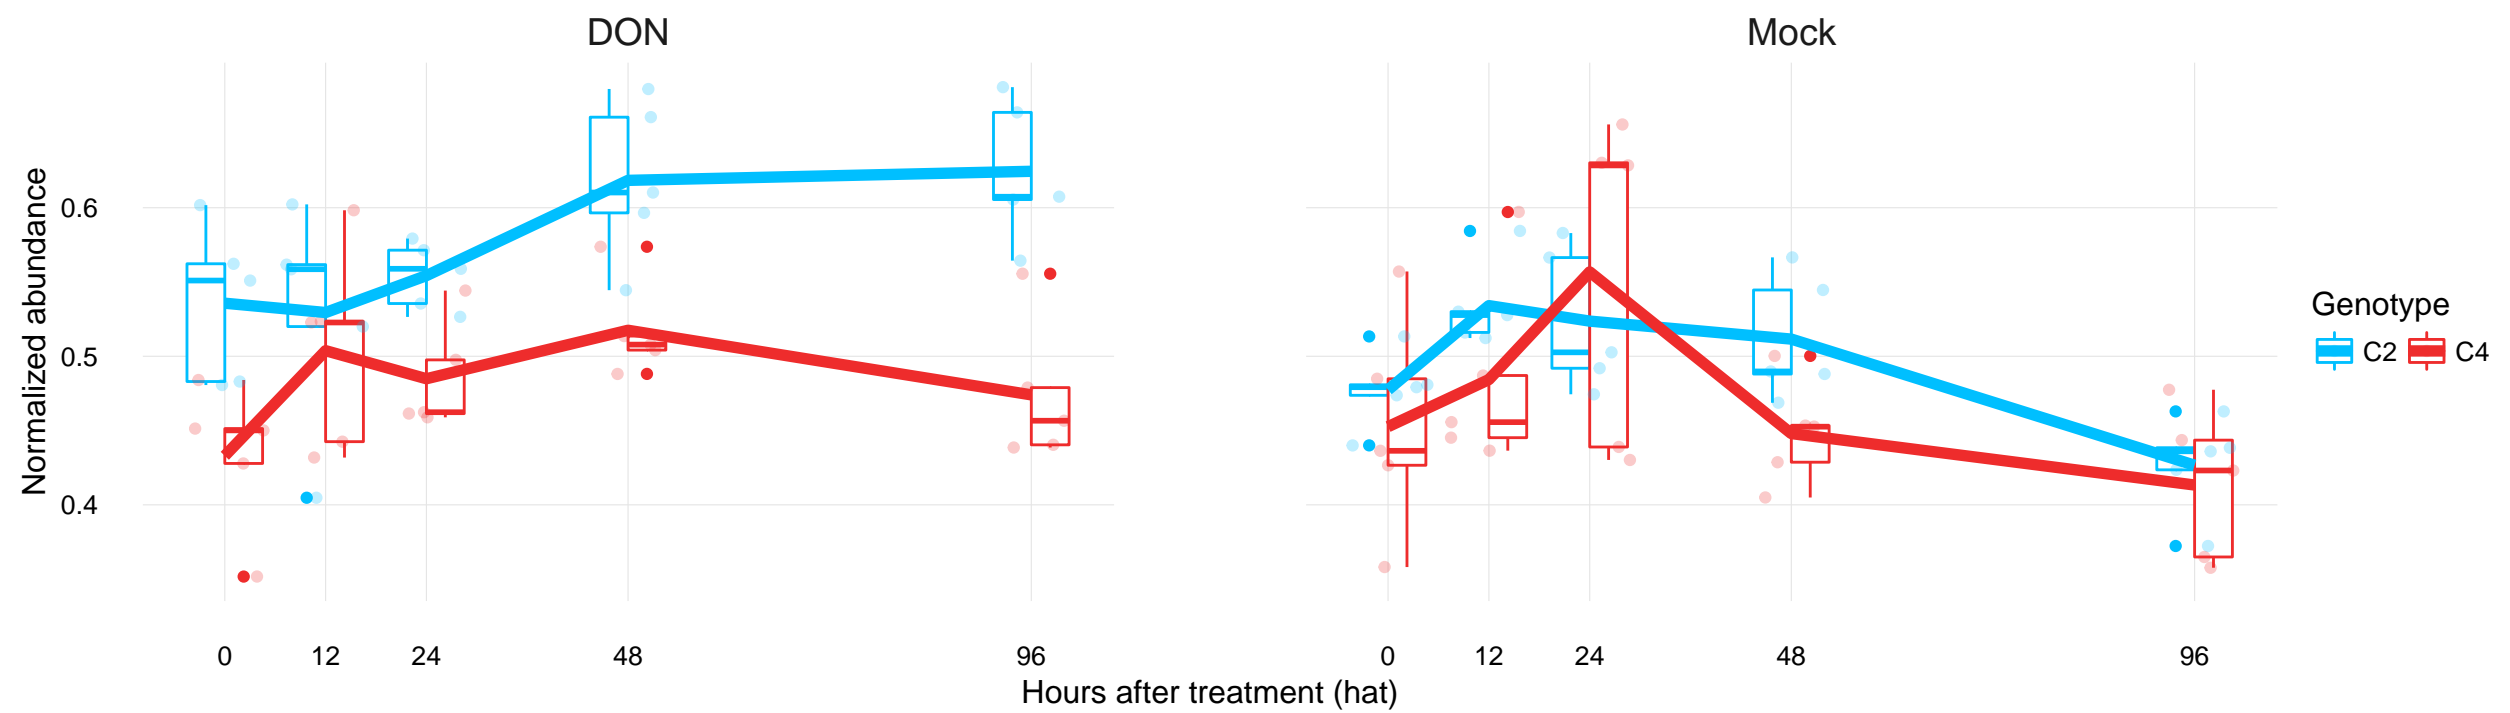

## CM, Remus; different treatments

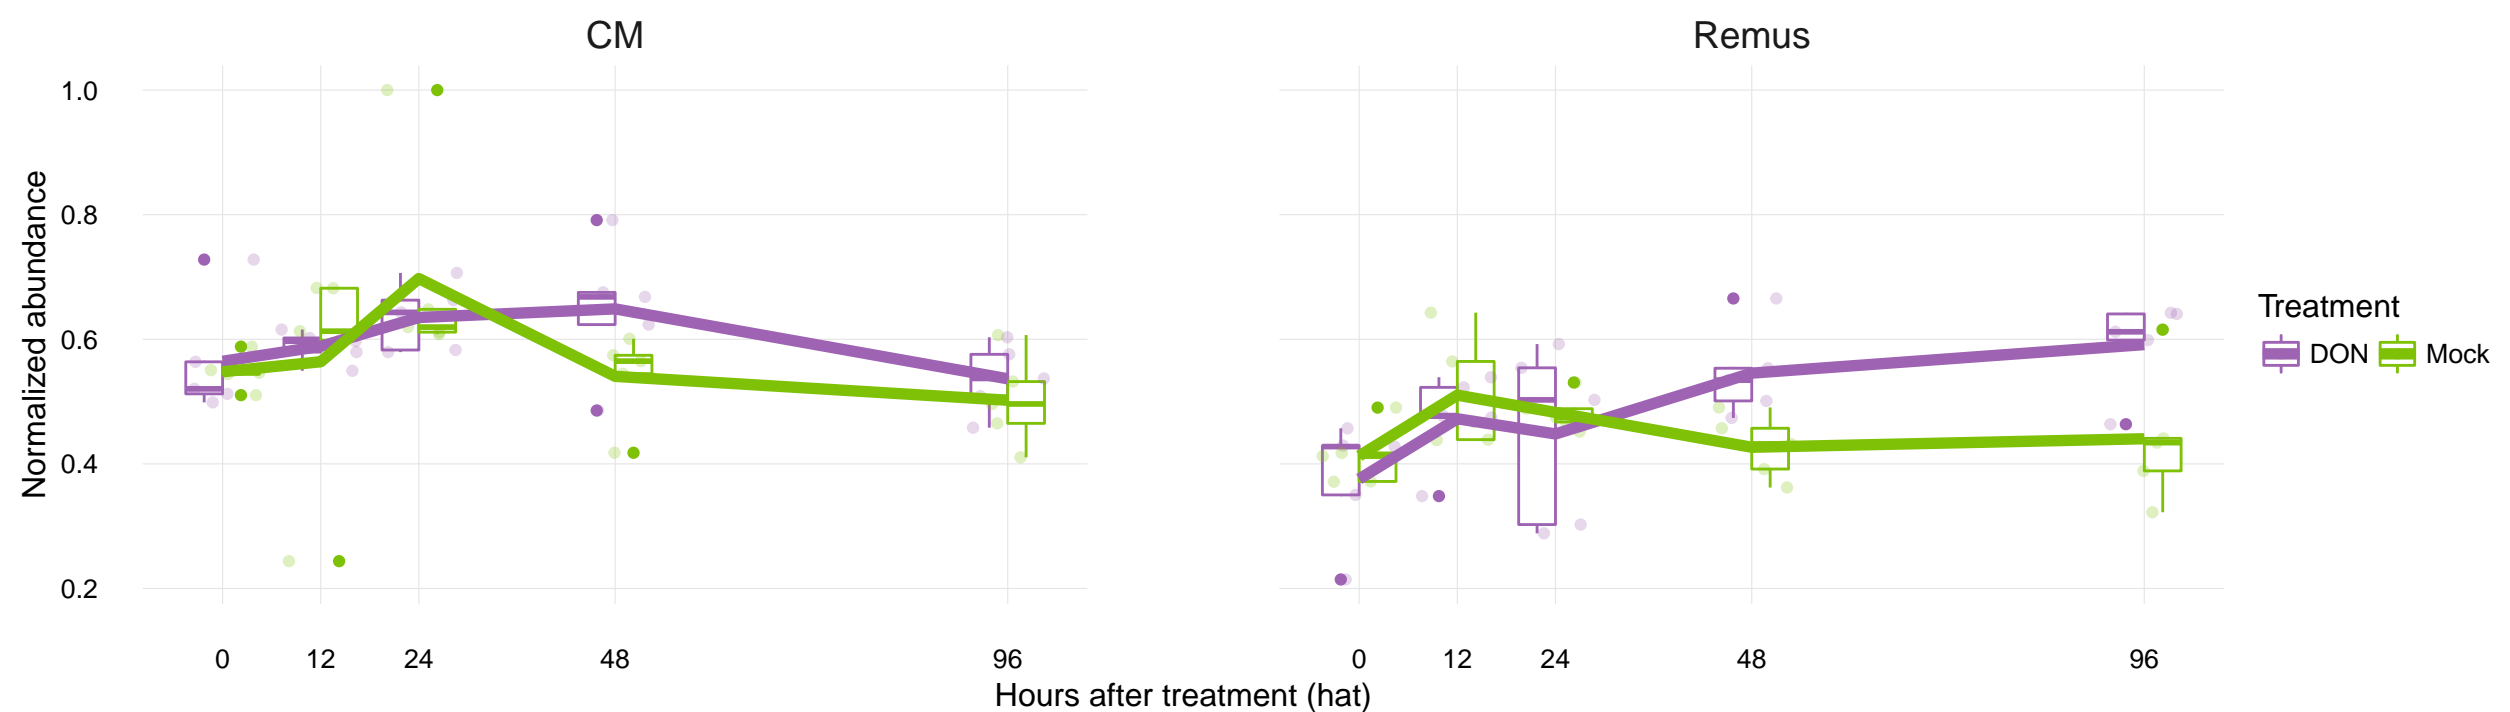

## DON, Mock; all four genotypes

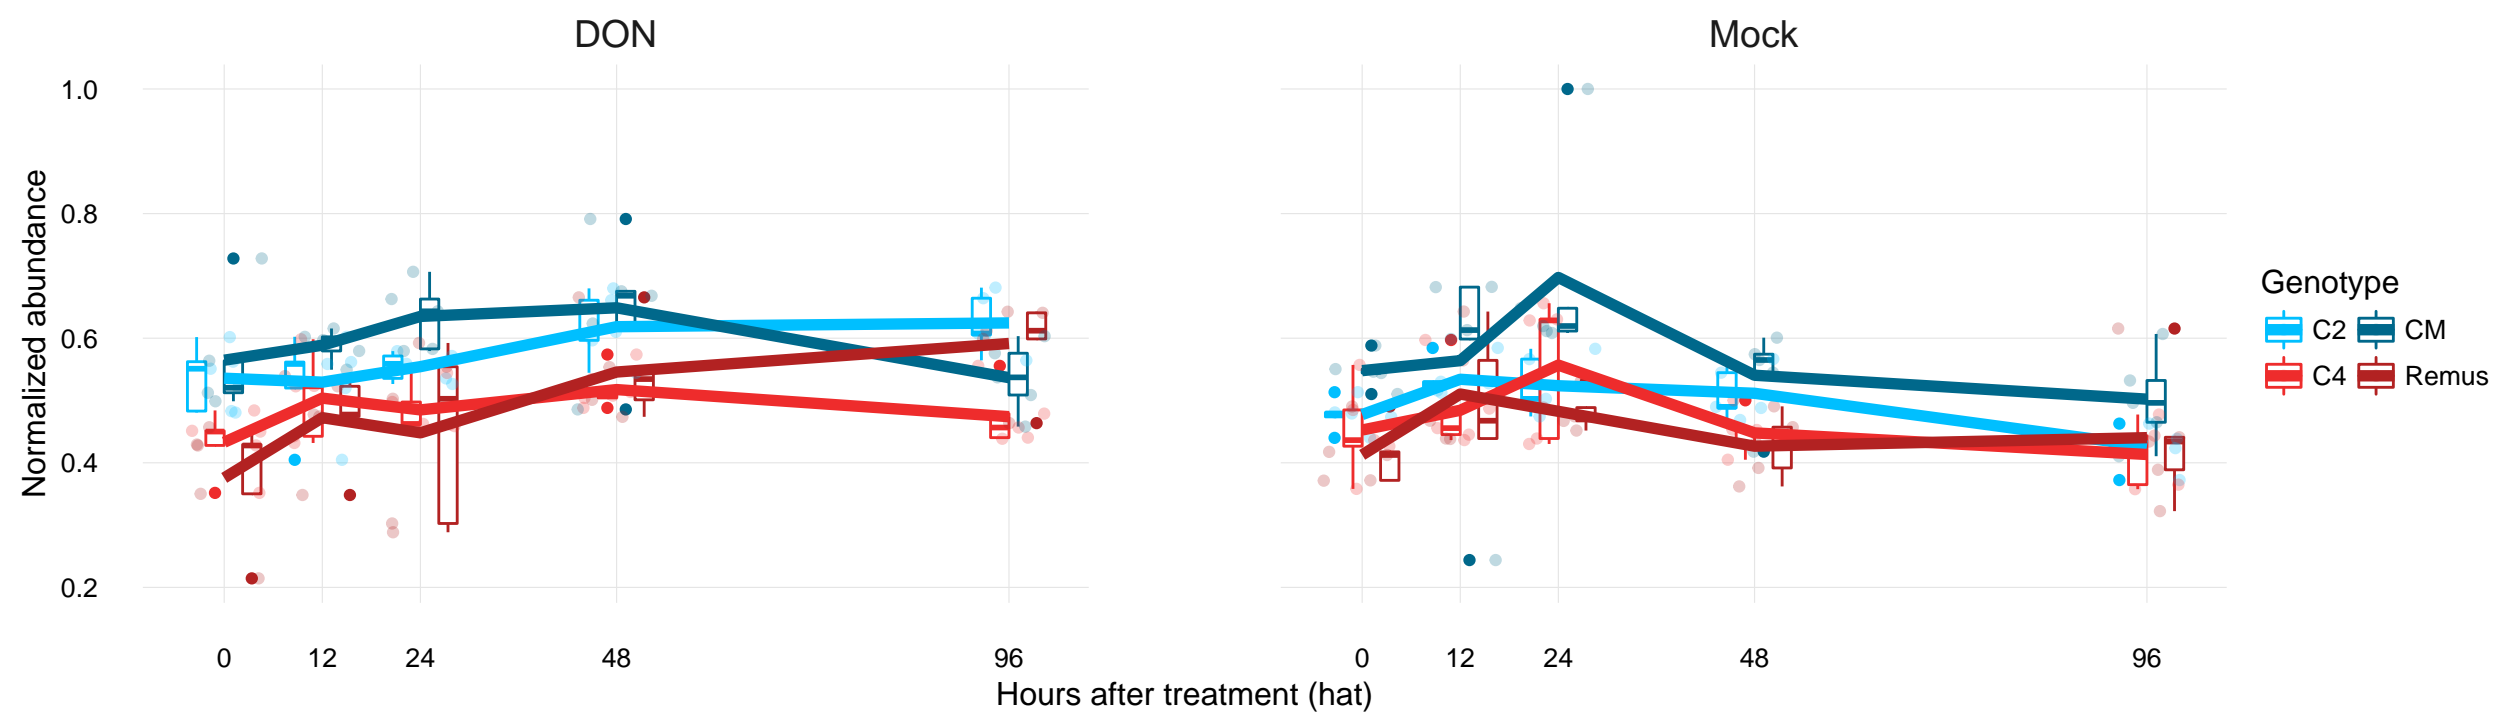

# A.120

Annotated as Flavonoid (GlcF)  
(17 database hits)

|                |                          |
|----------------|--------------------------|
| MZ             | 507.1498                 |
| RT             | 19.45 min                |
| Normalization  | Directly via KPX samples |
| Cluster        | Cluster 4                |
| Cn total / Phe | 24 /                     |

## C2, C4; different treatments

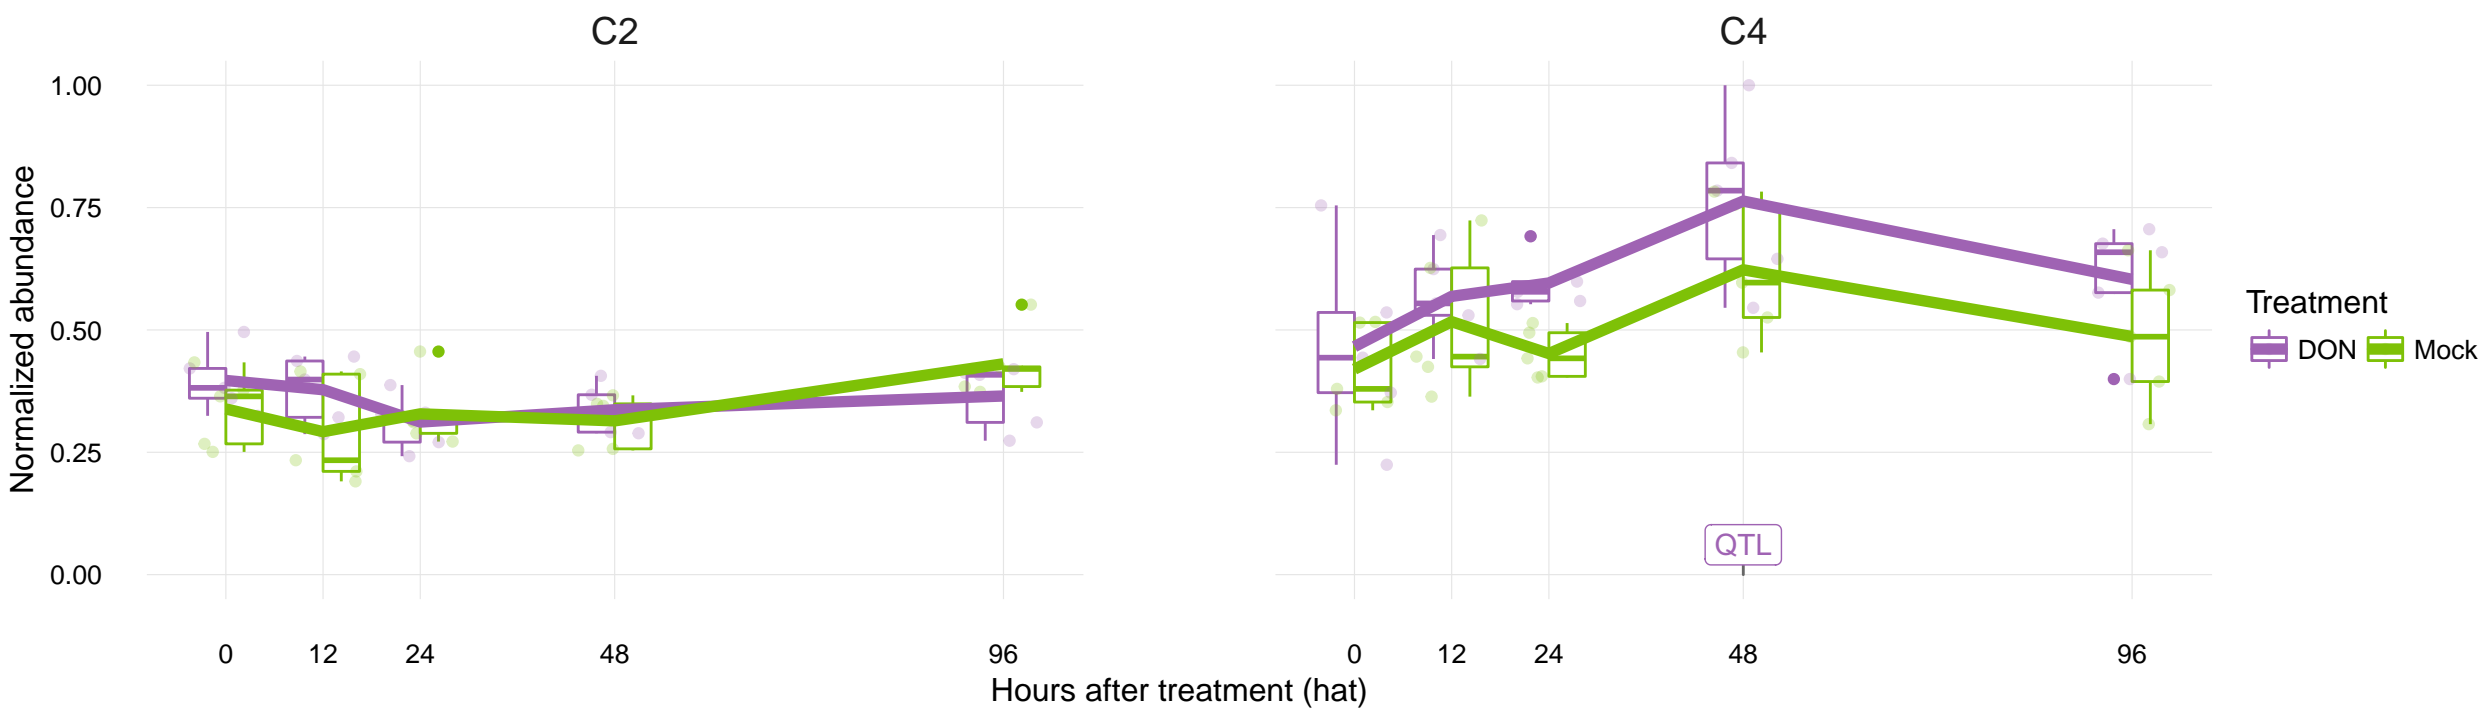

## DON, Mock; different genotypes

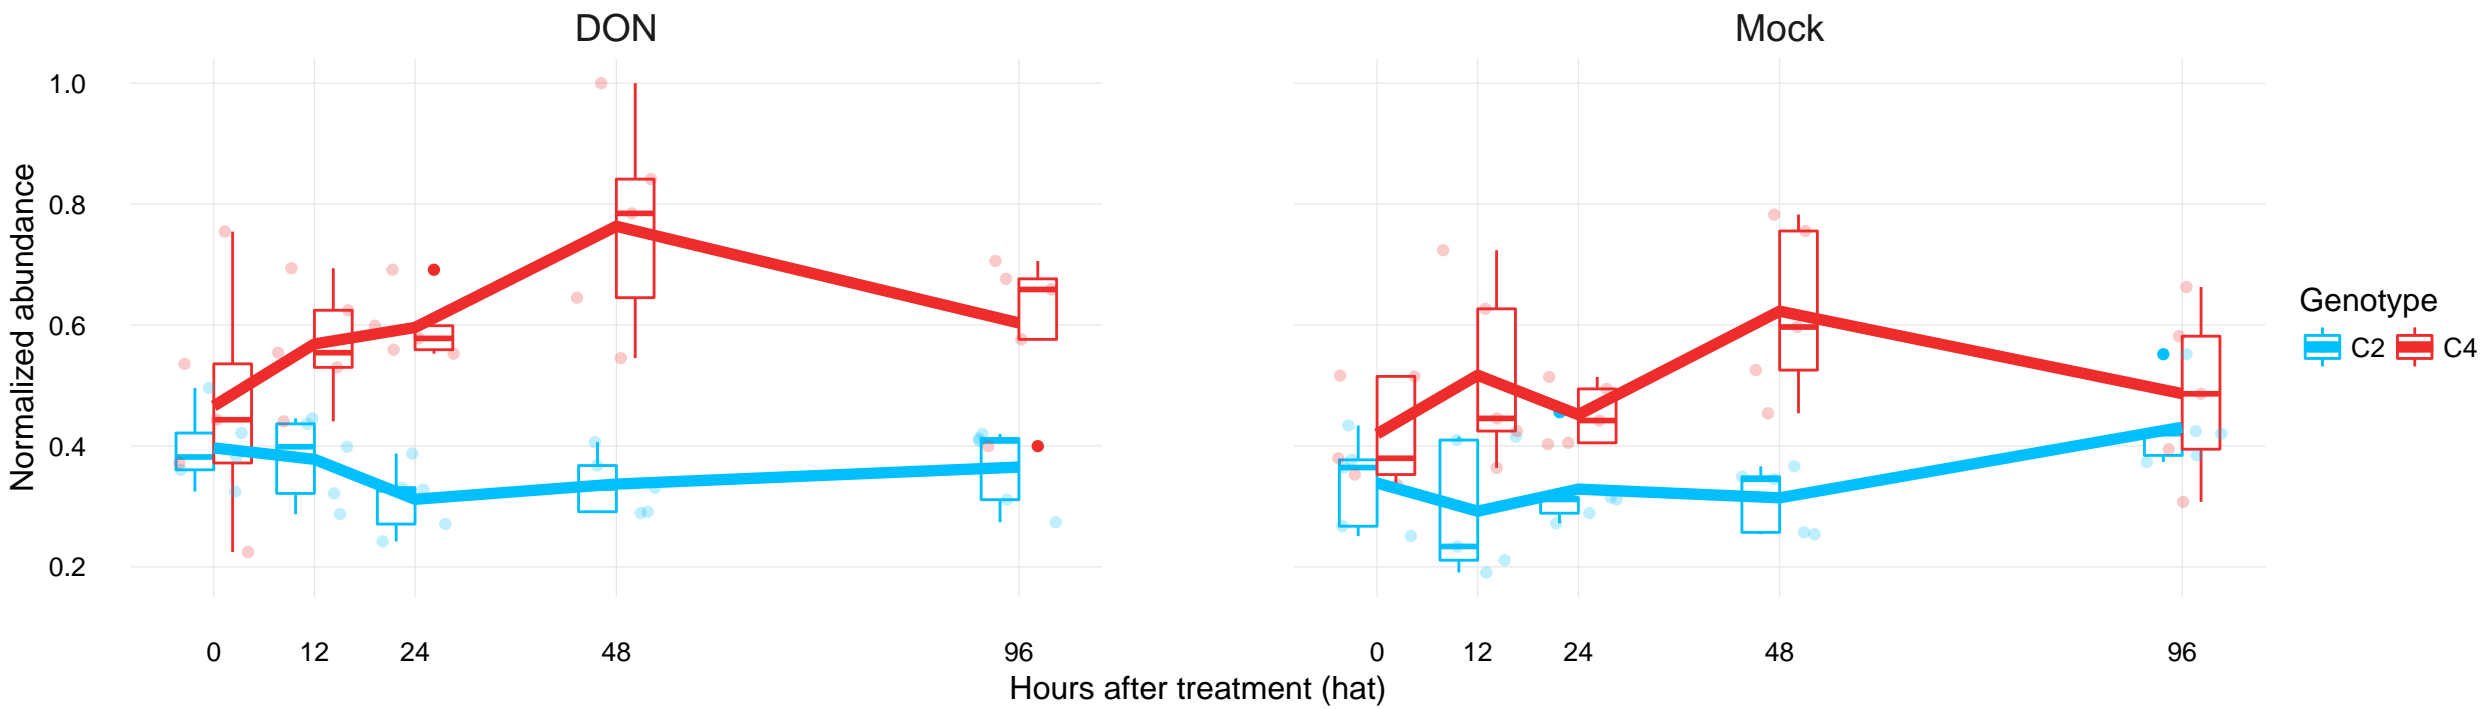

## CM, Remus; different treatments

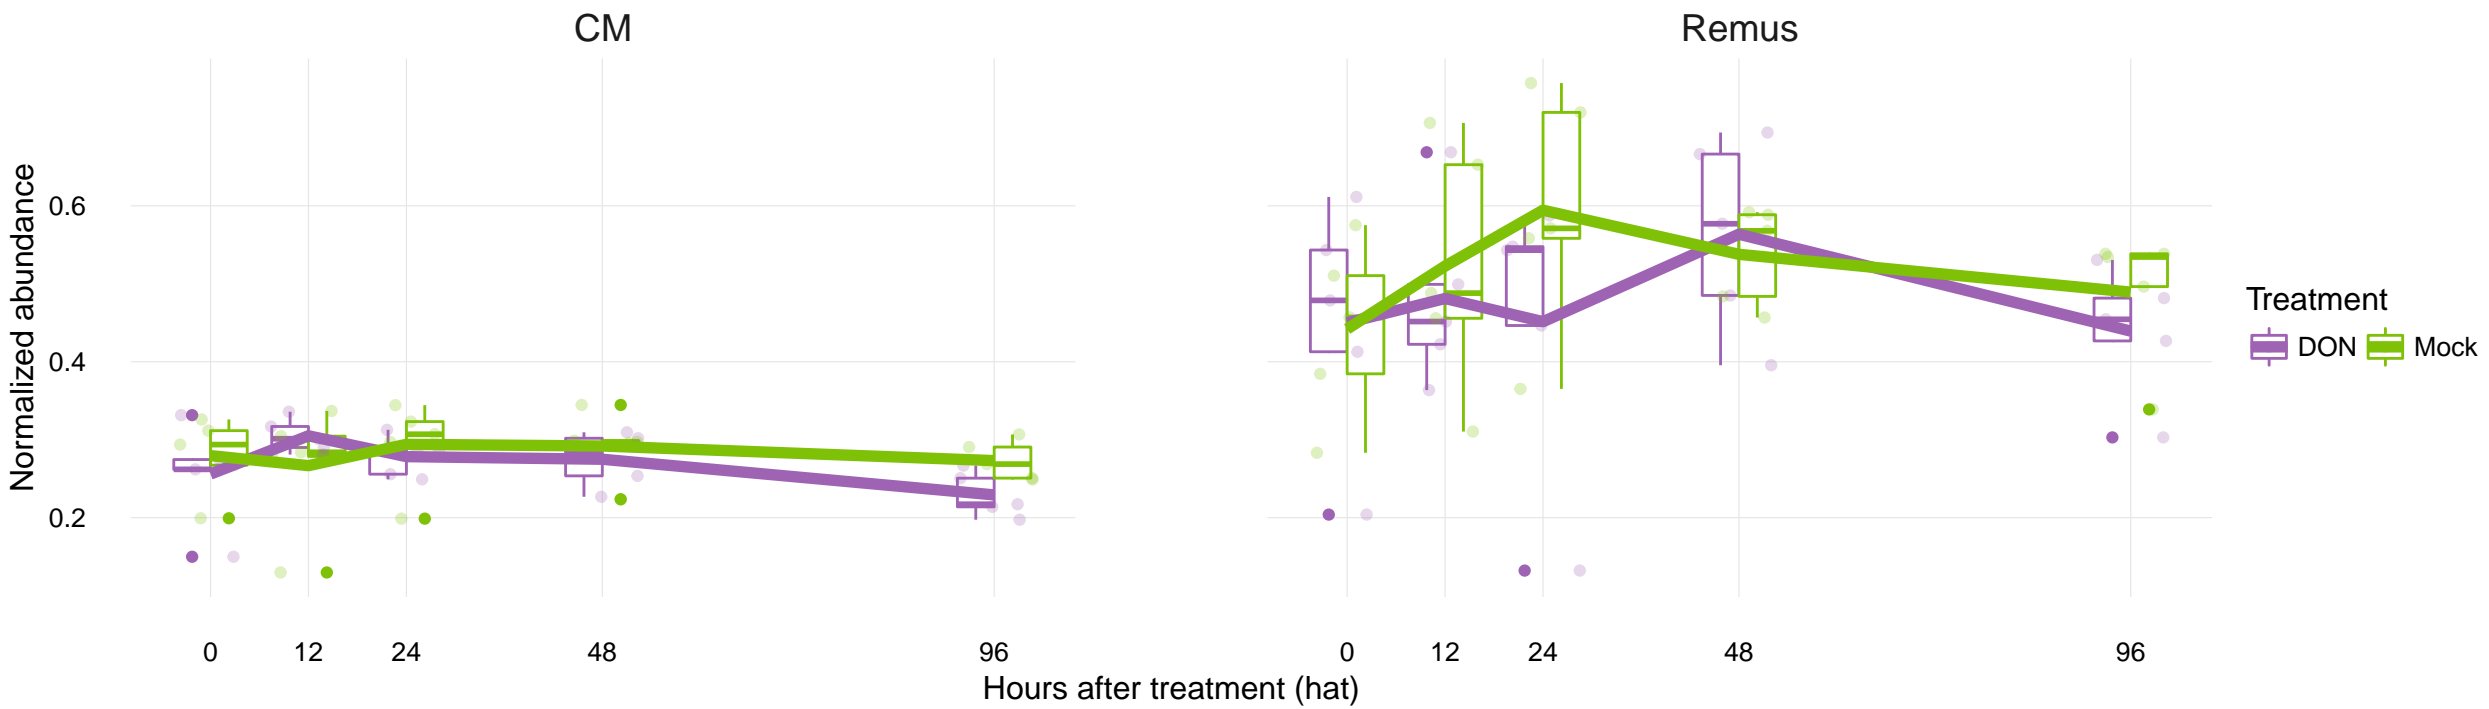

## DON, Mock; all four genotypes

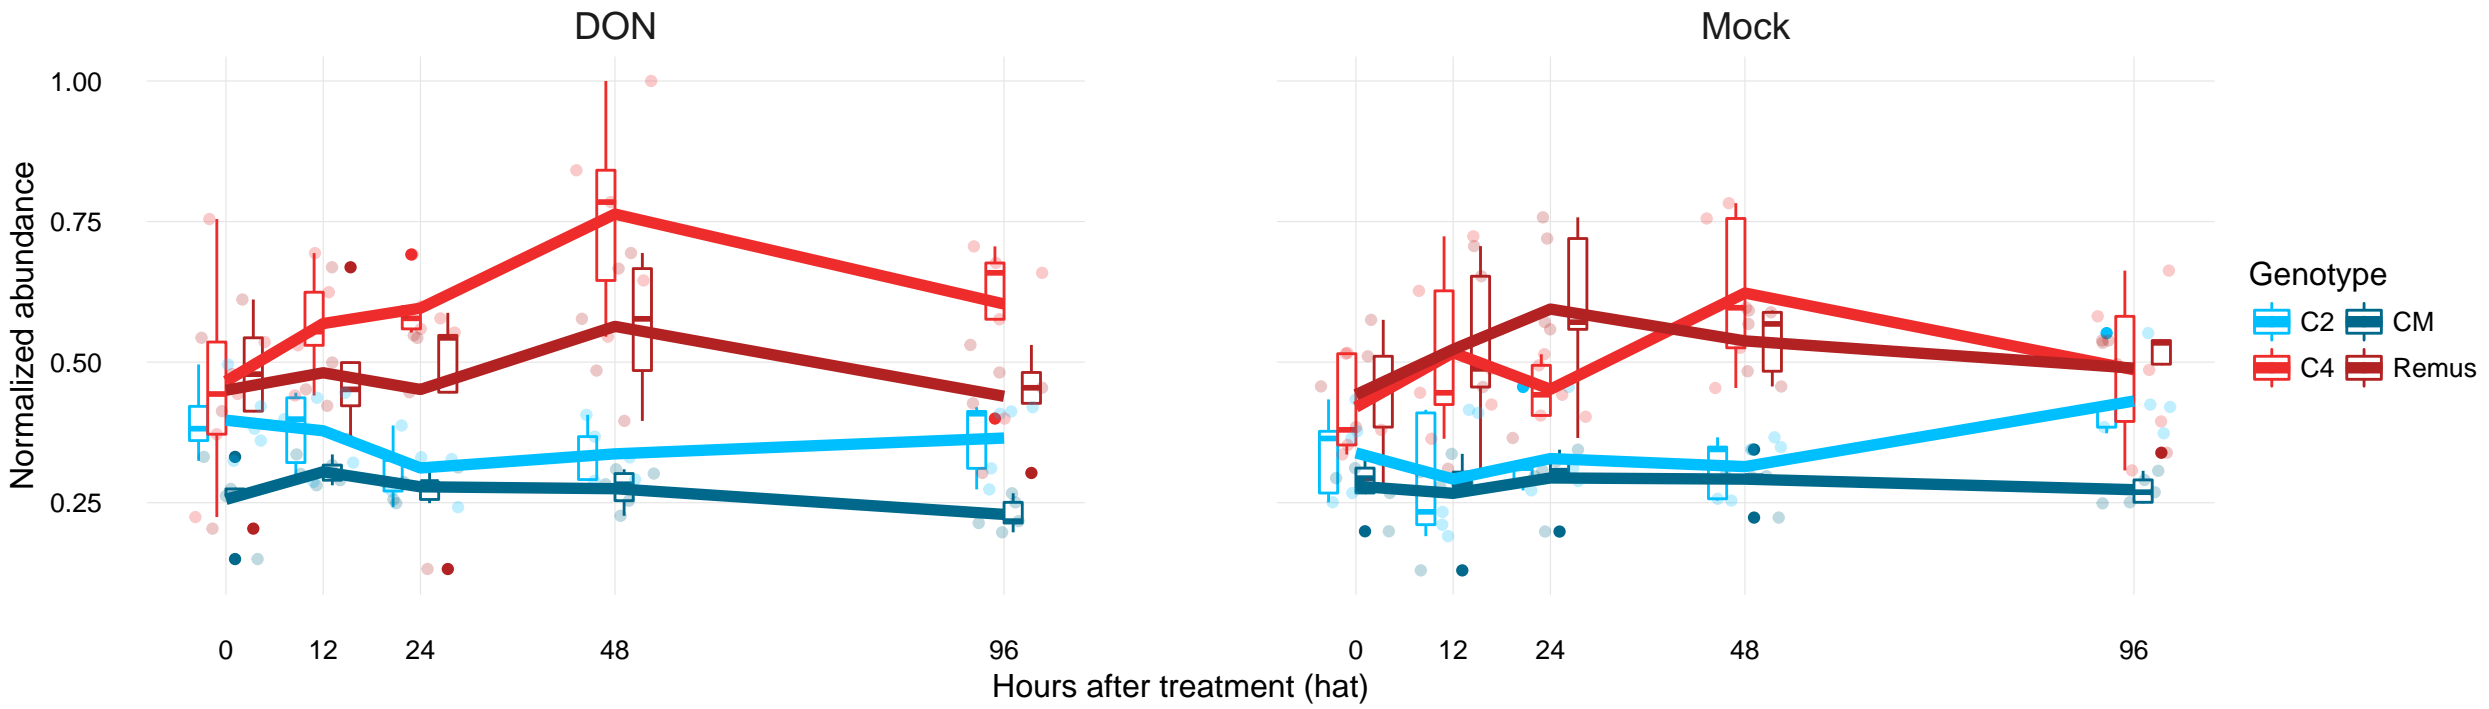

# Vitexin

Identified metabolite (level 1)

|                |                          |
|----------------|--------------------------|
| MZ             | 433.1131                 |
| RT             | 14.63 min                |
| Normalization  | Directly via KPX samples |
| Cluster        | Cluster 4                |
| Cn total / Phe | 21 /                     |

C2, C4; different treatments

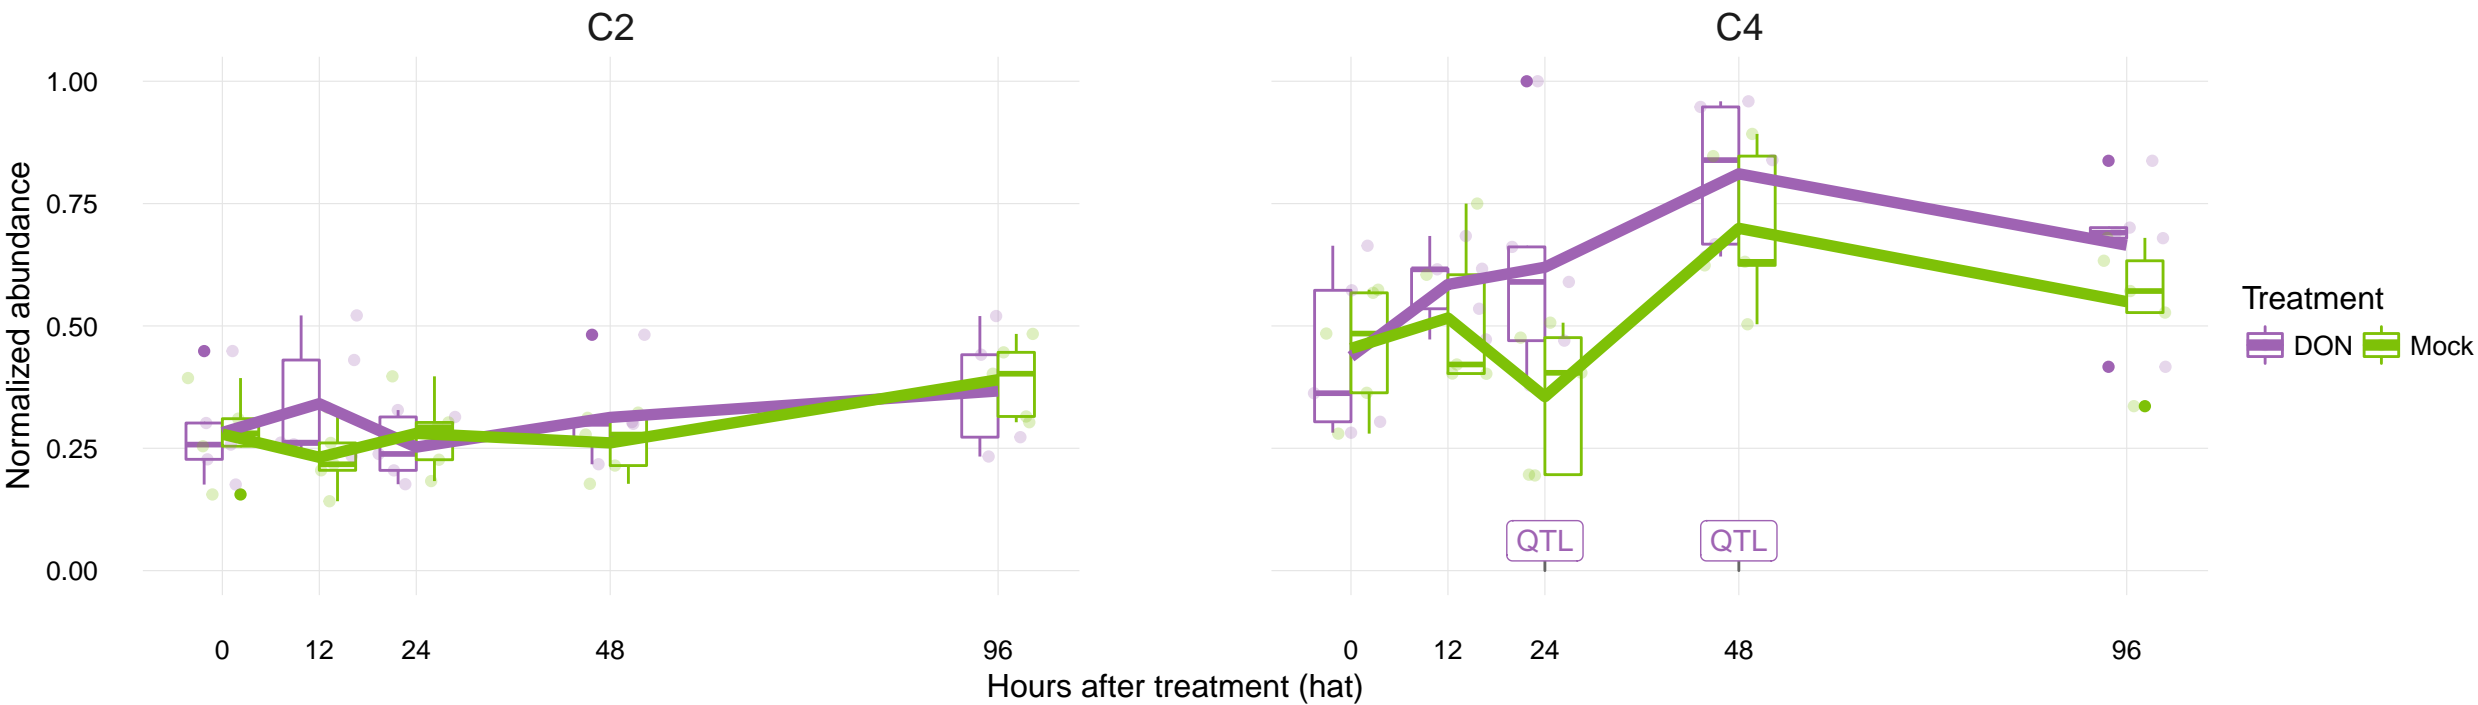

DON, Mock; different genotypes

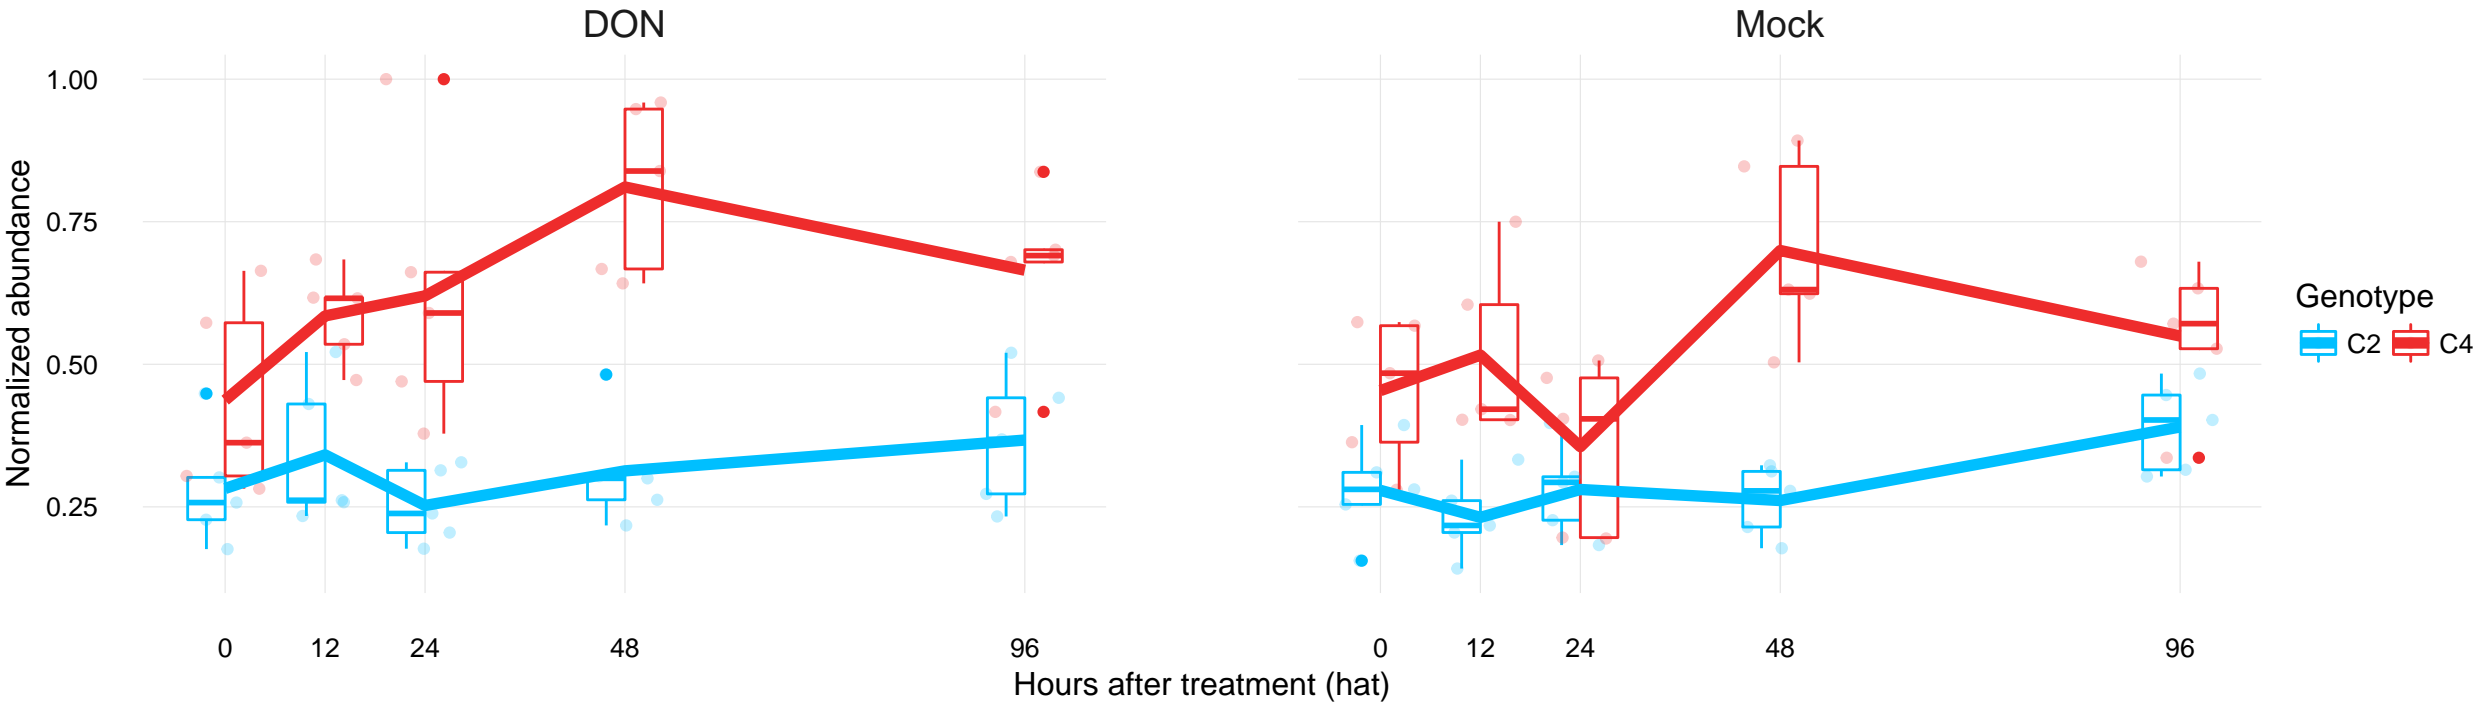

CM, Remus; different treatments

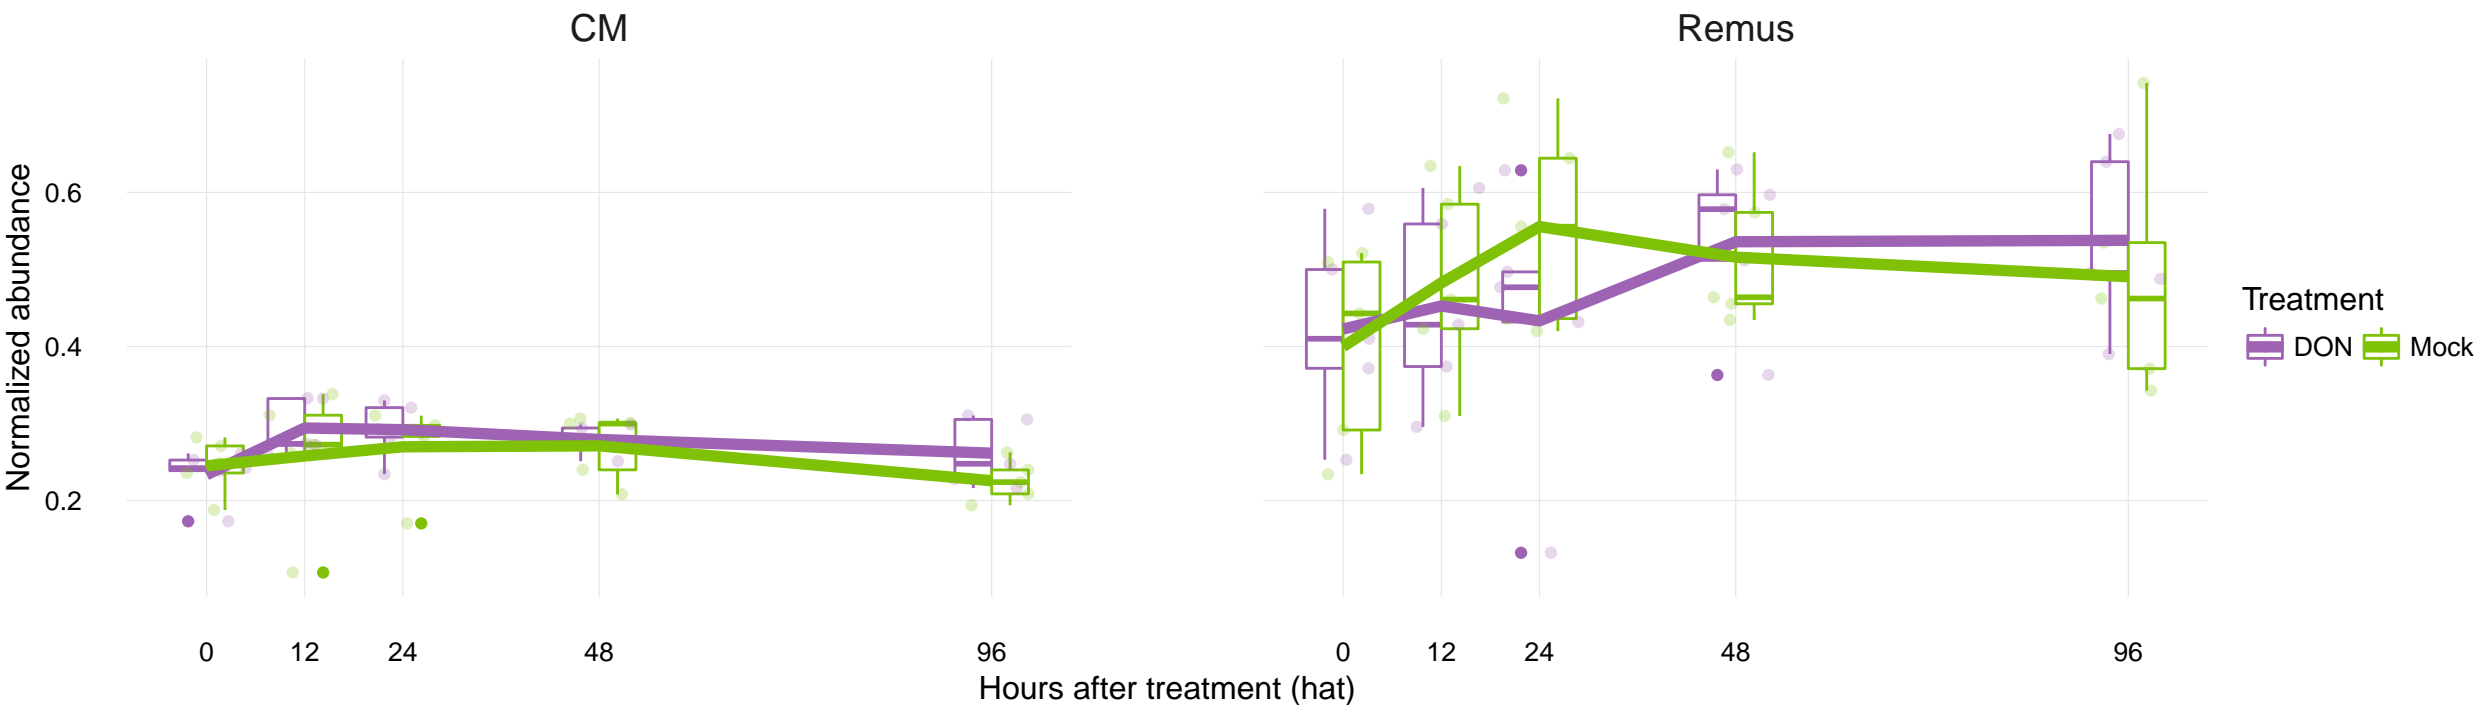

DON, Mock; all four genotypes

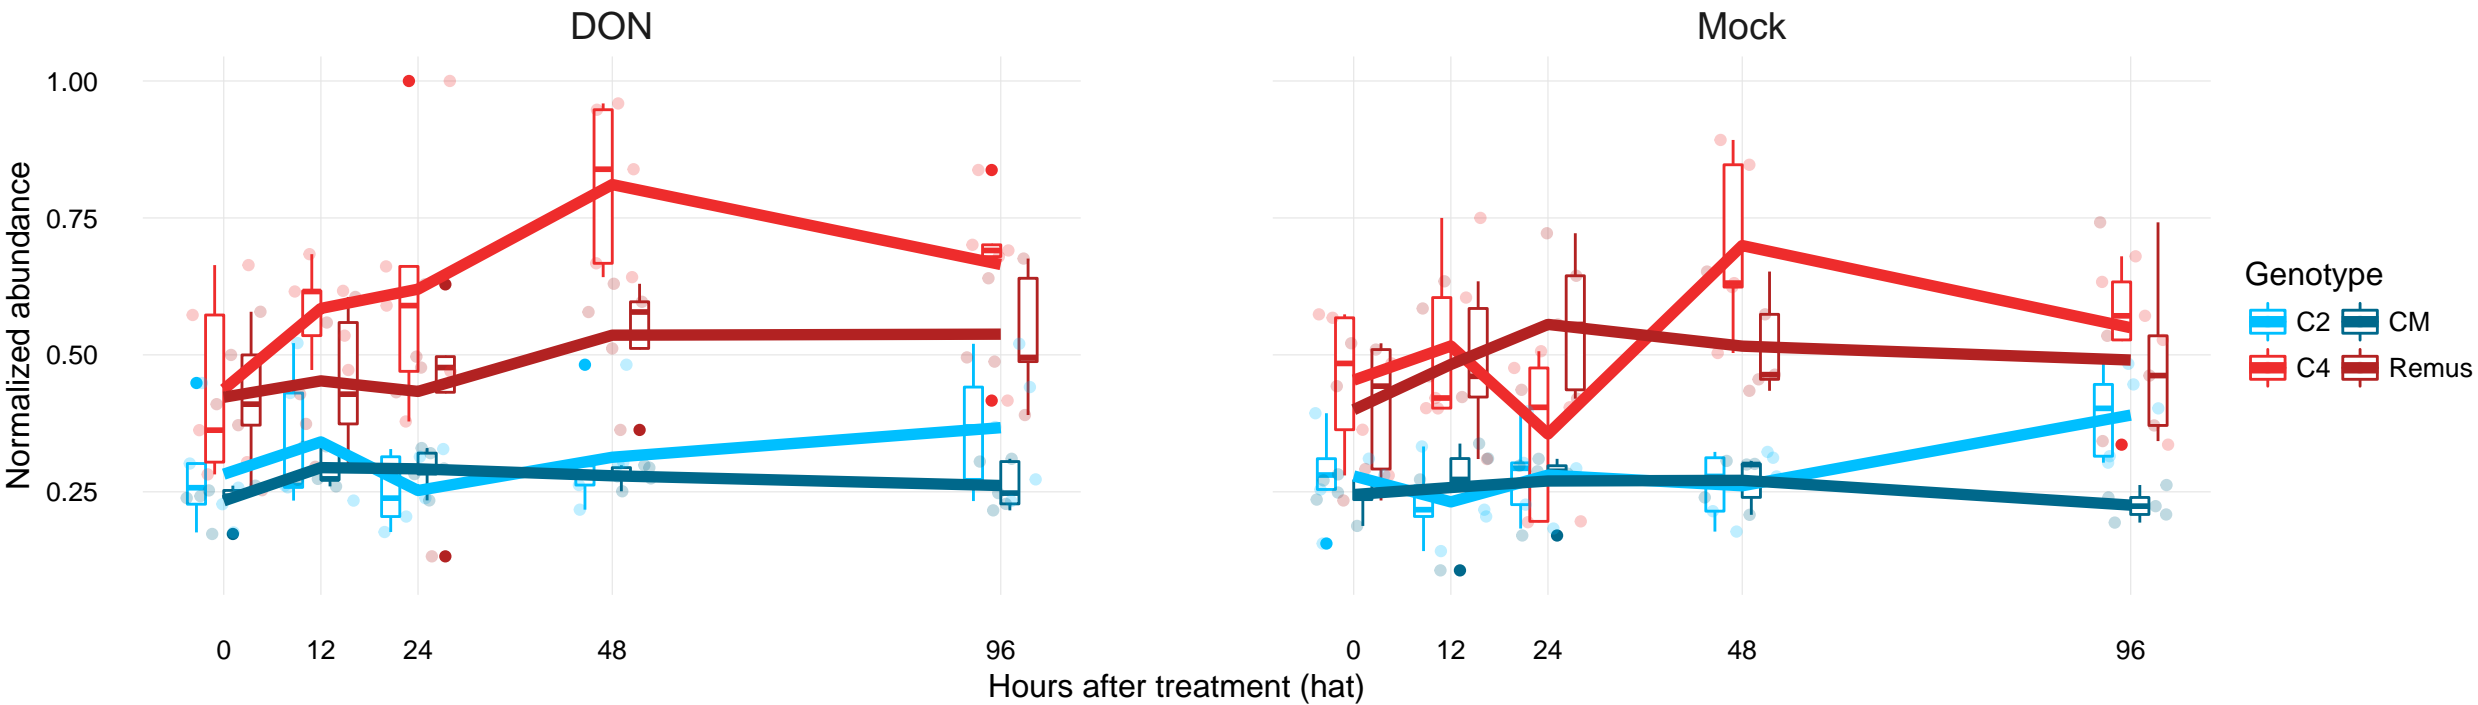

A.92

Annotated as Flavonoid (diGlcF)  
(52 database hits)

|                |                          |
|----------------|--------------------------|
| MZ             | 609.1815                 |
| RT             | 15.69 min                |
| Normalization  | Directly via KPX samples |
| Cluster        | Cluster 4                |
| Cn total / Phe | 28 /                     |

C2, C4; different treatments

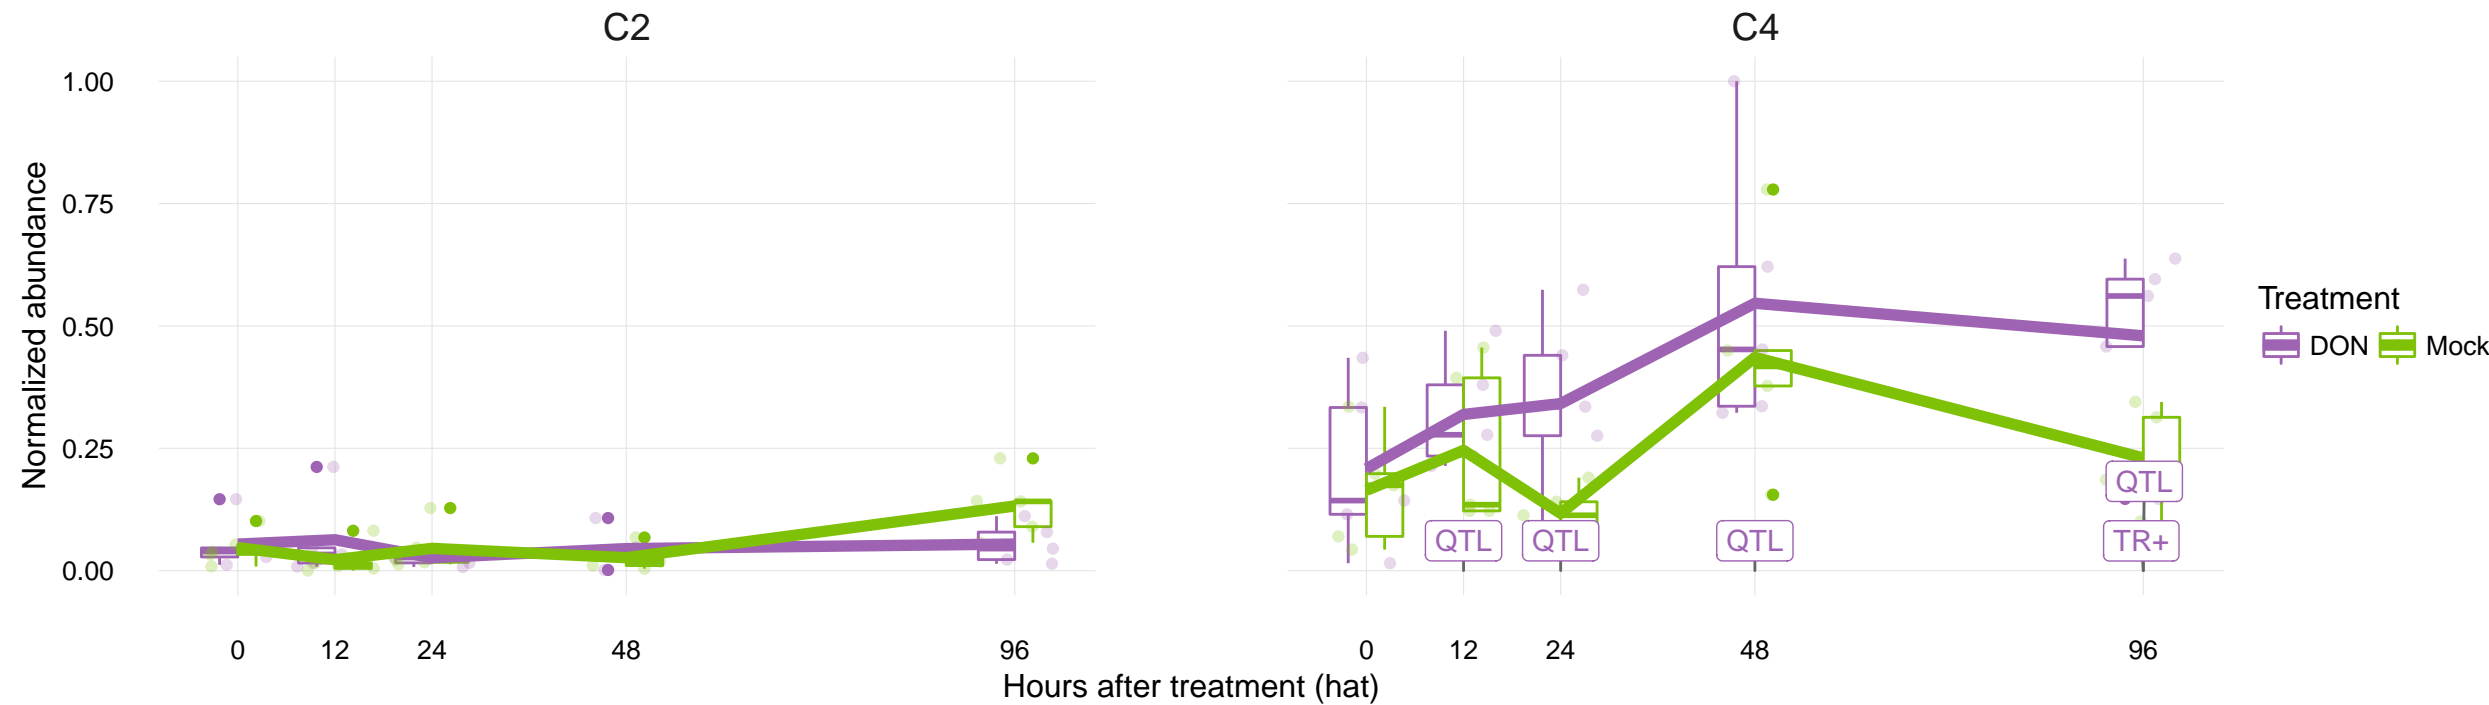

DON, Mock; different genotypes

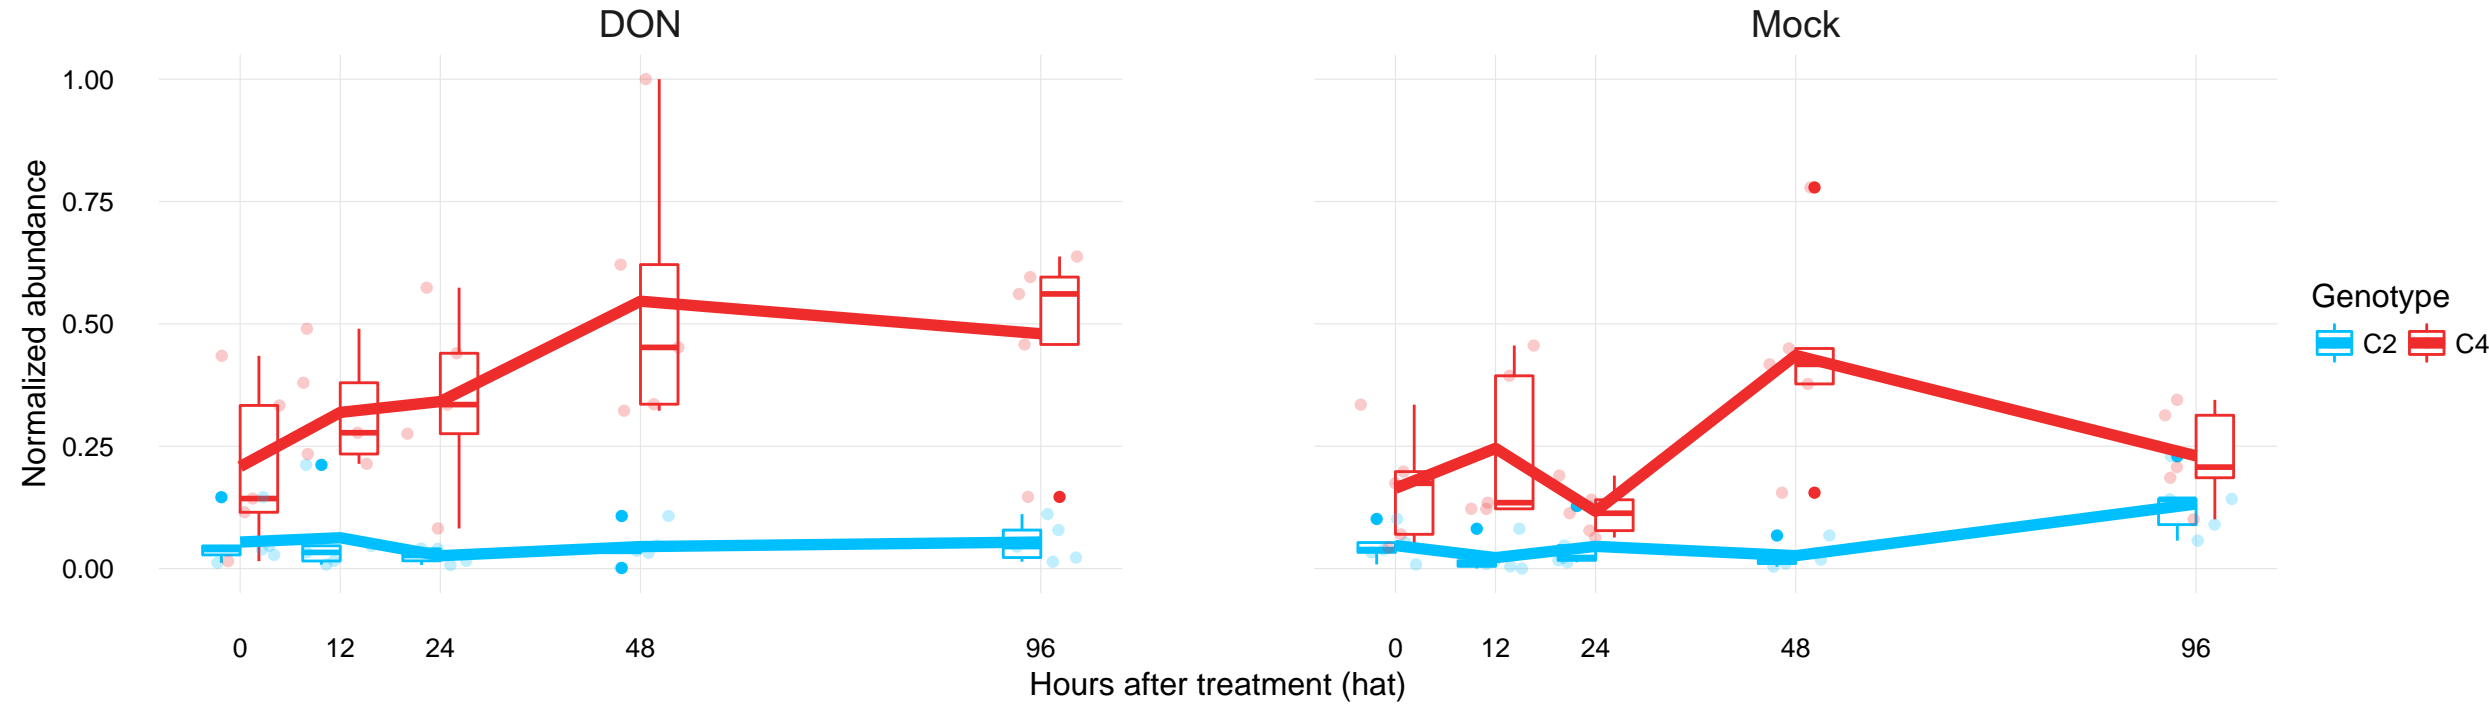

CM, Remus; different treatments

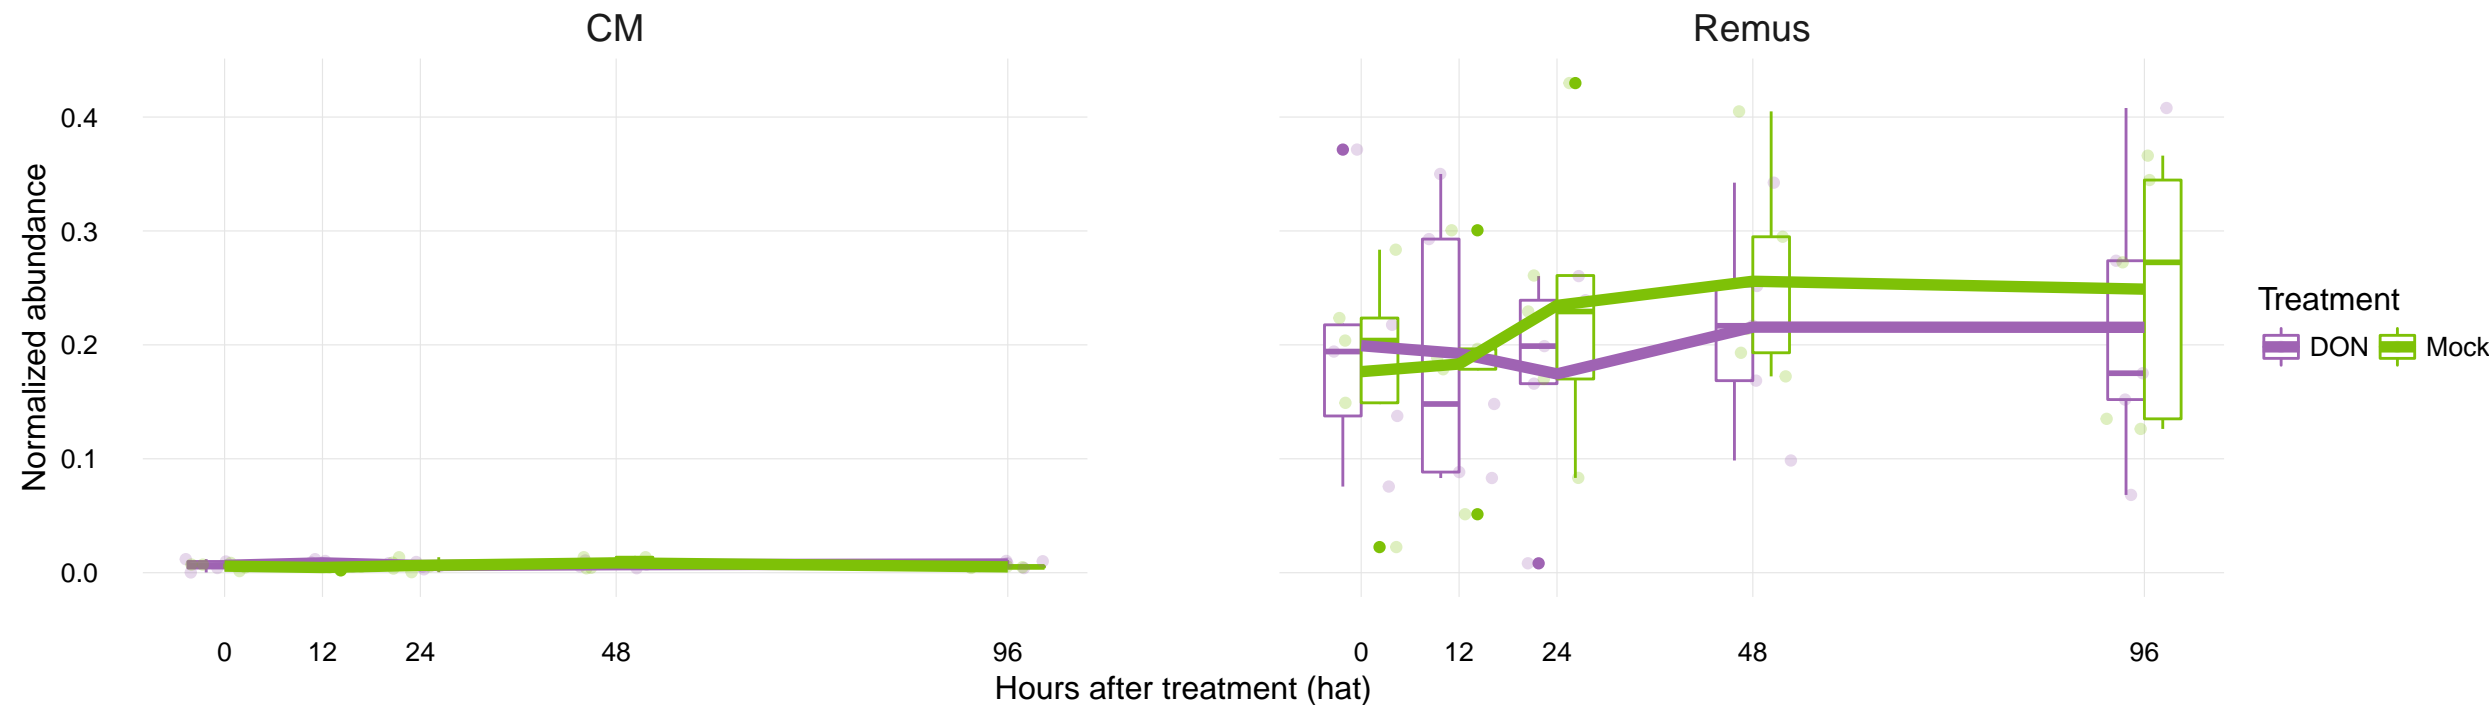

DON, Mock; all four genotypes

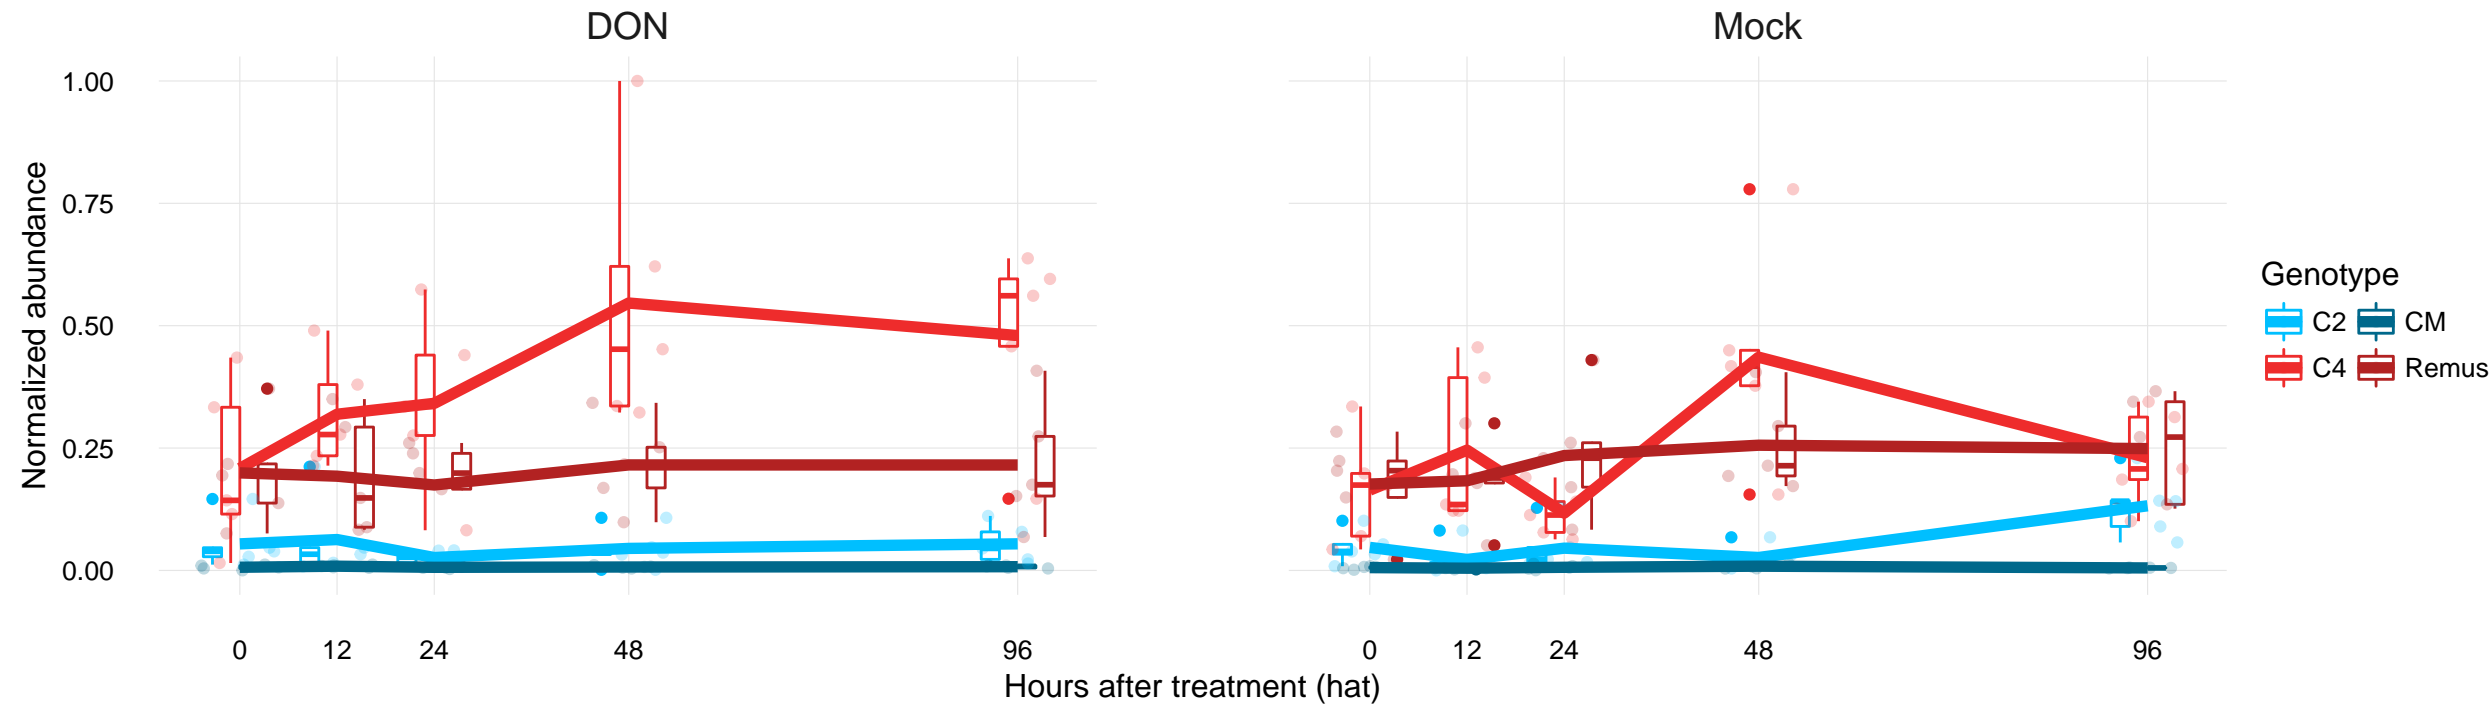

# Homoorientin

Identified metabolite (level 1)

|                |                          |
|----------------|--------------------------|
| MZ             | 449.1081                 |
| RT             | 13.88 min                |
| Normalization  | Directly via KPX samples |
| Cluster        | Cluster 4                |
| Cn total / Phe | 21 /                     |

## C2, C4; different treatments

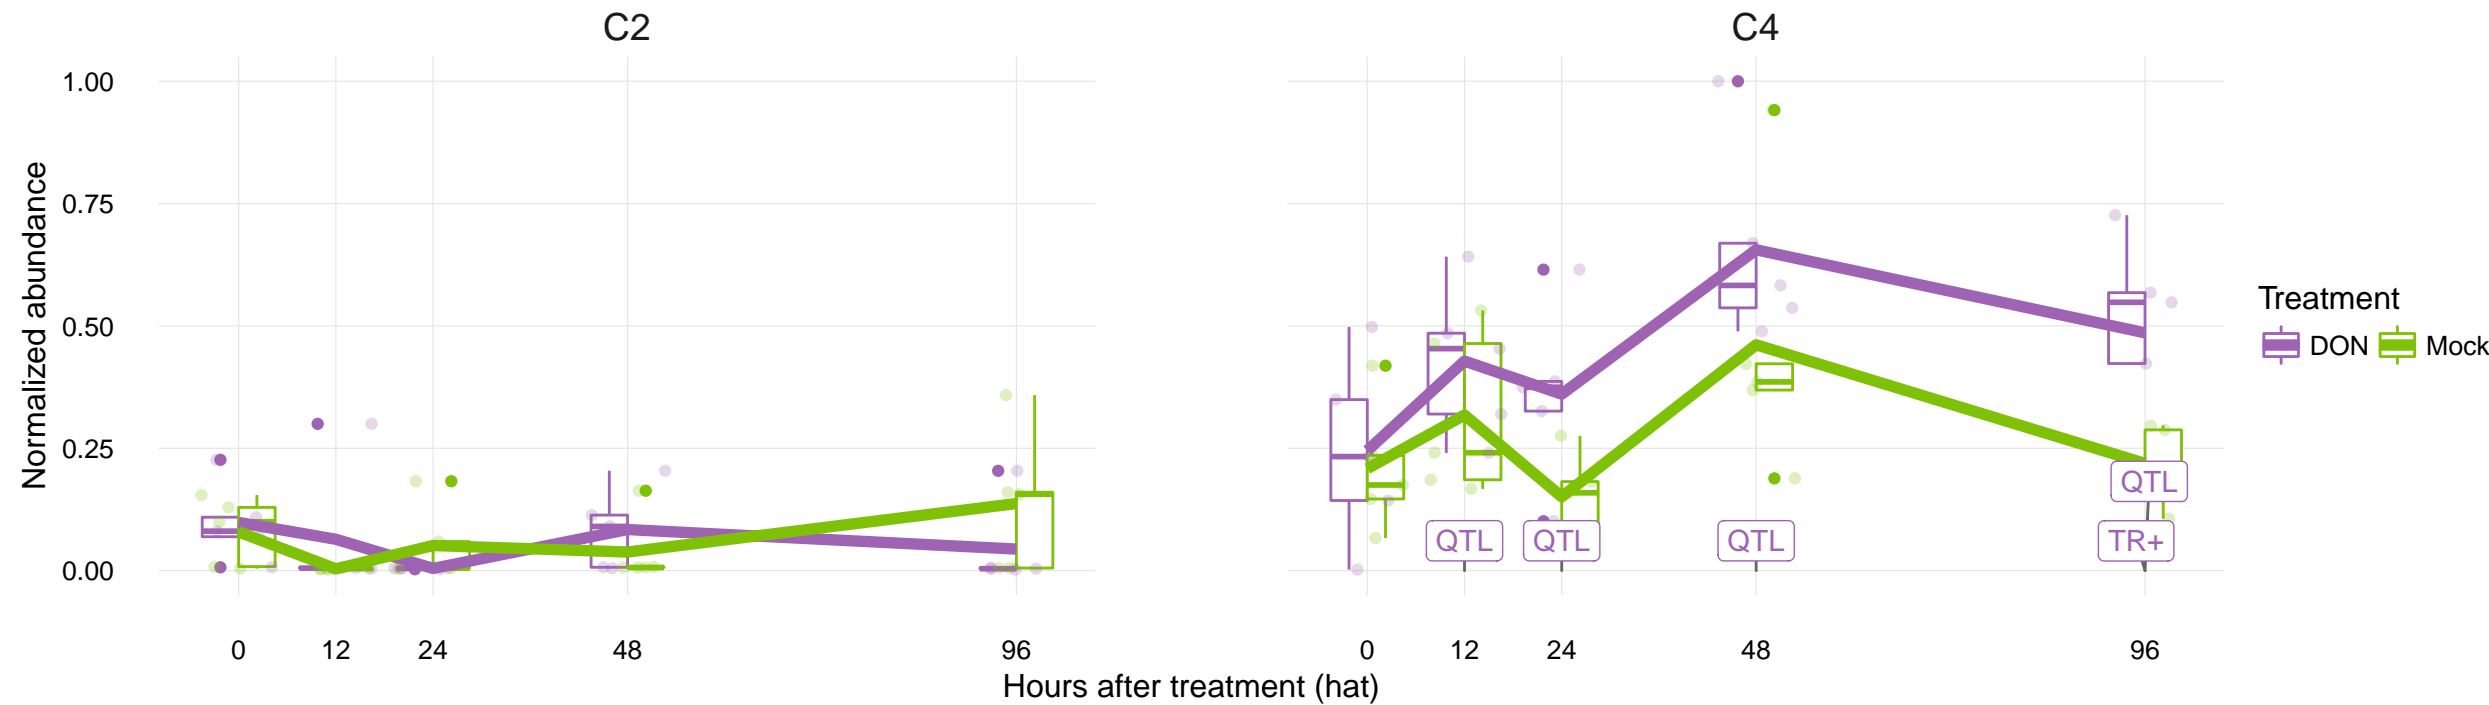

## DON, Mock; different genotypes

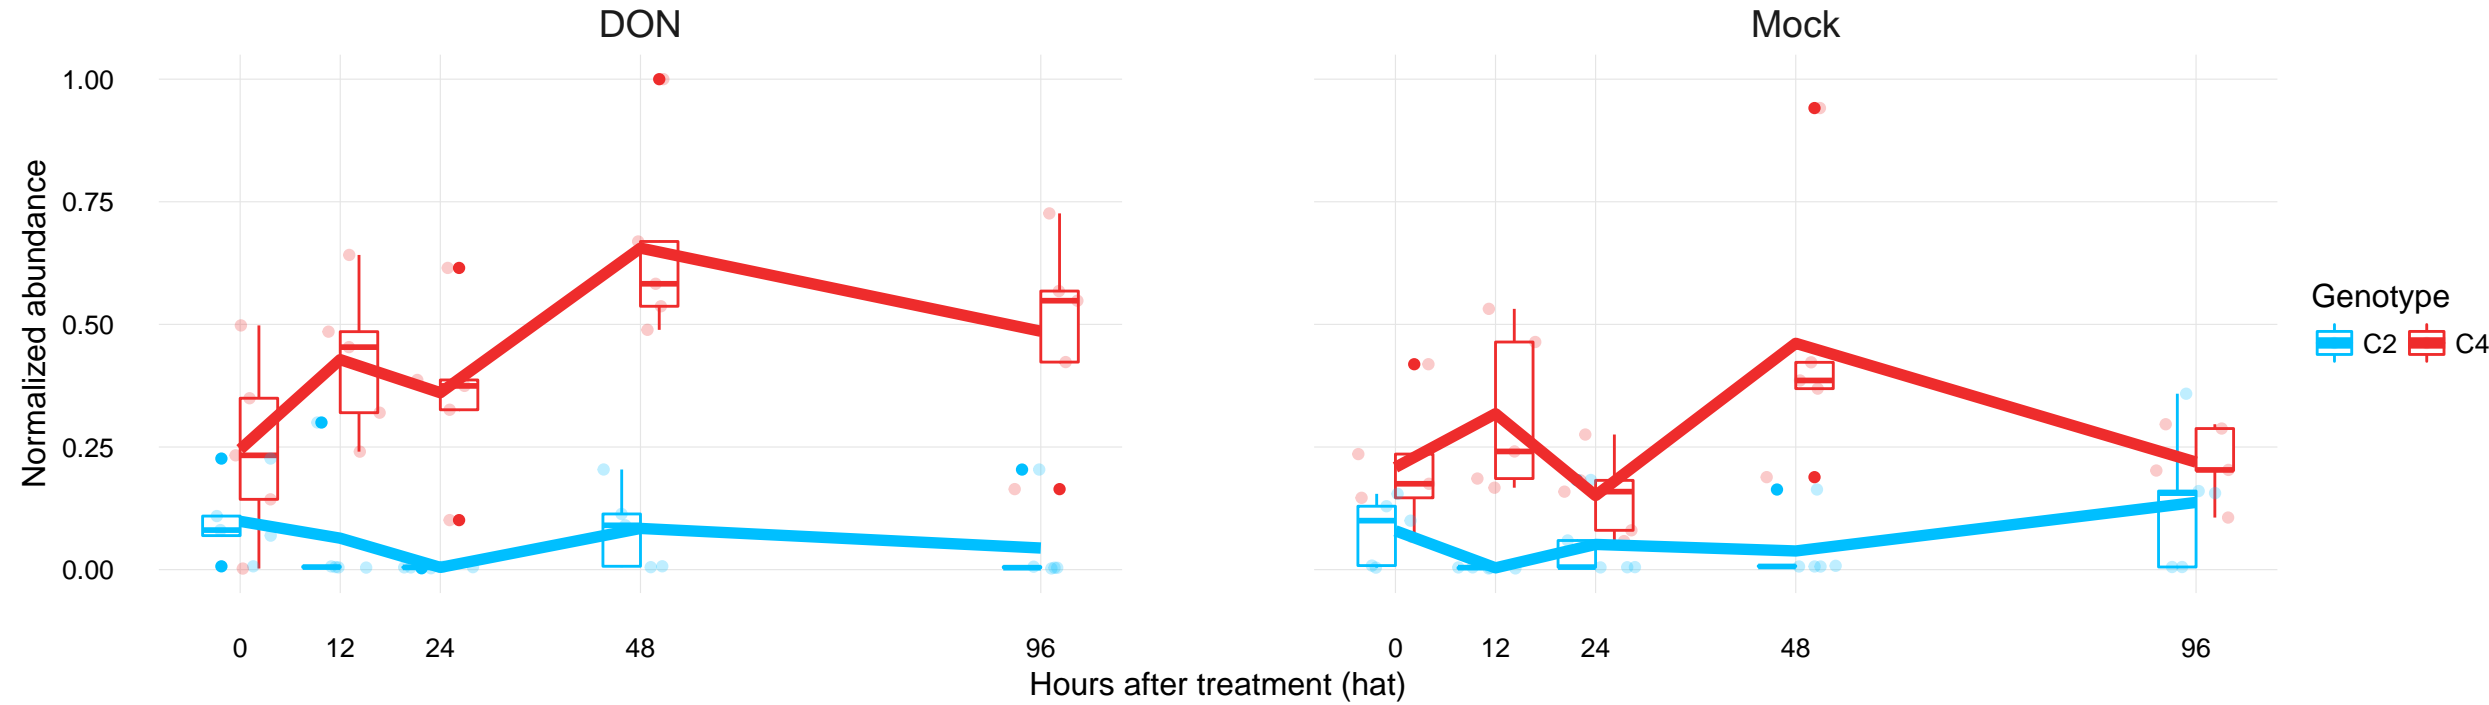

## CM, Remus; different treatments

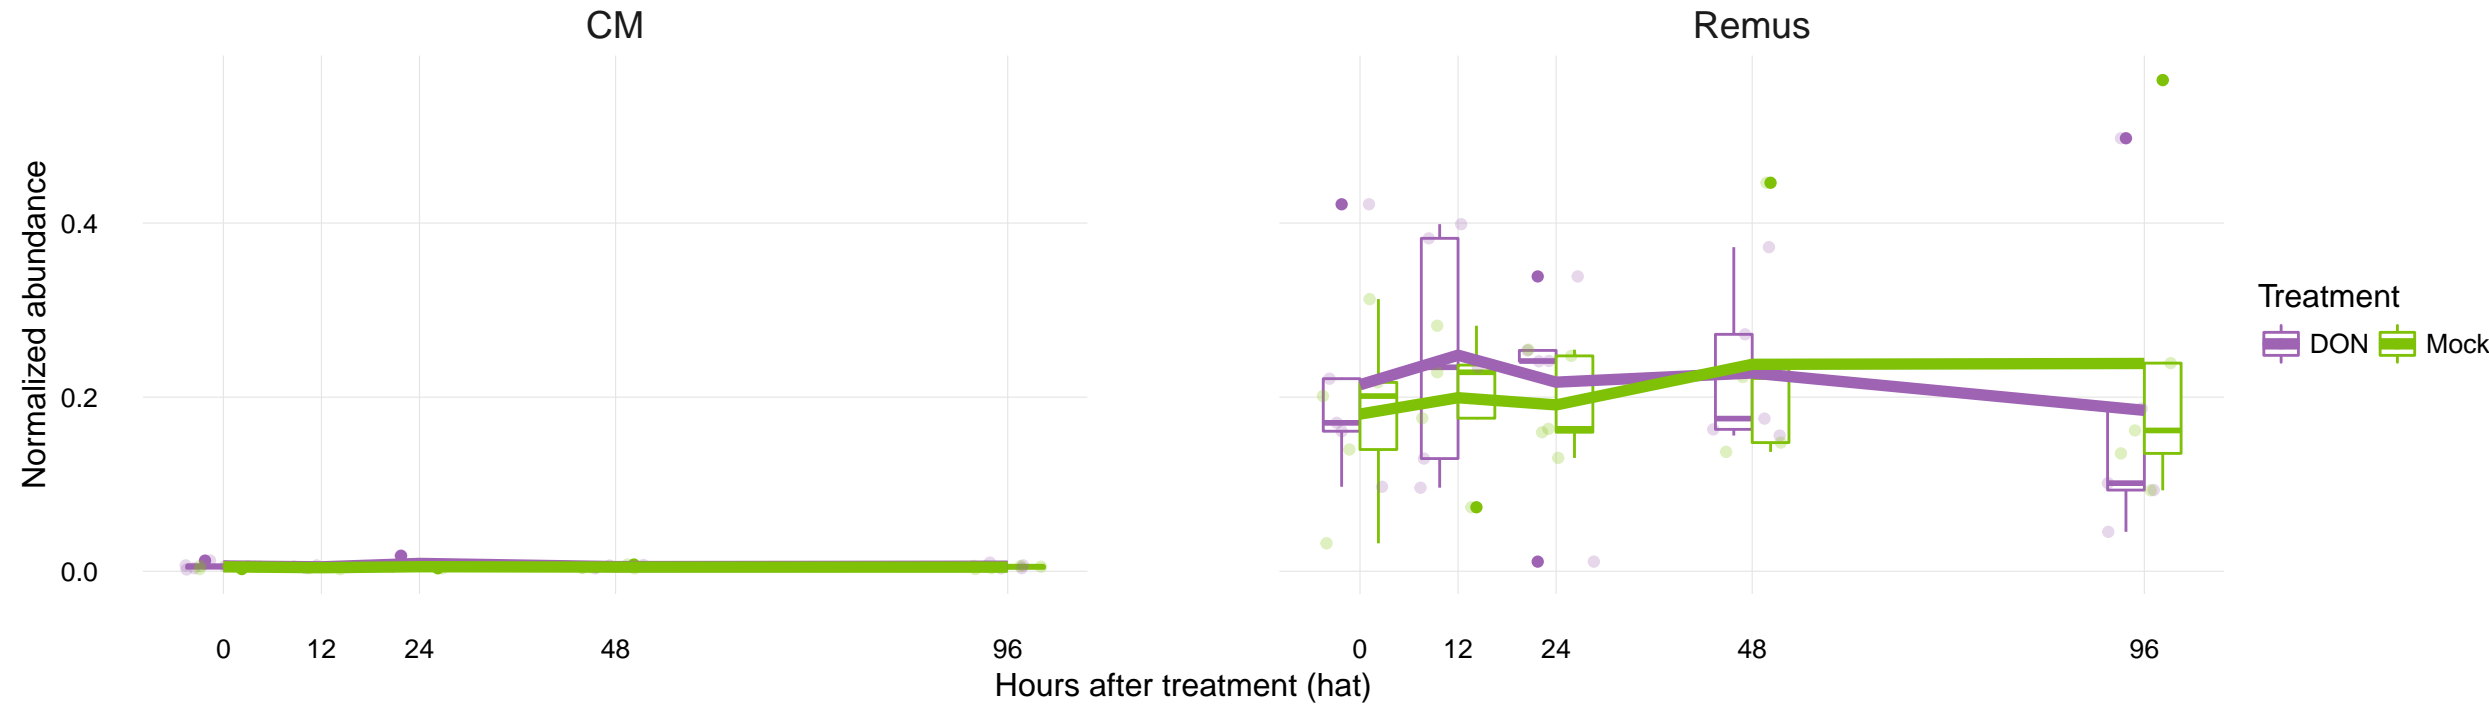

## DON, Mock; all four genotypes

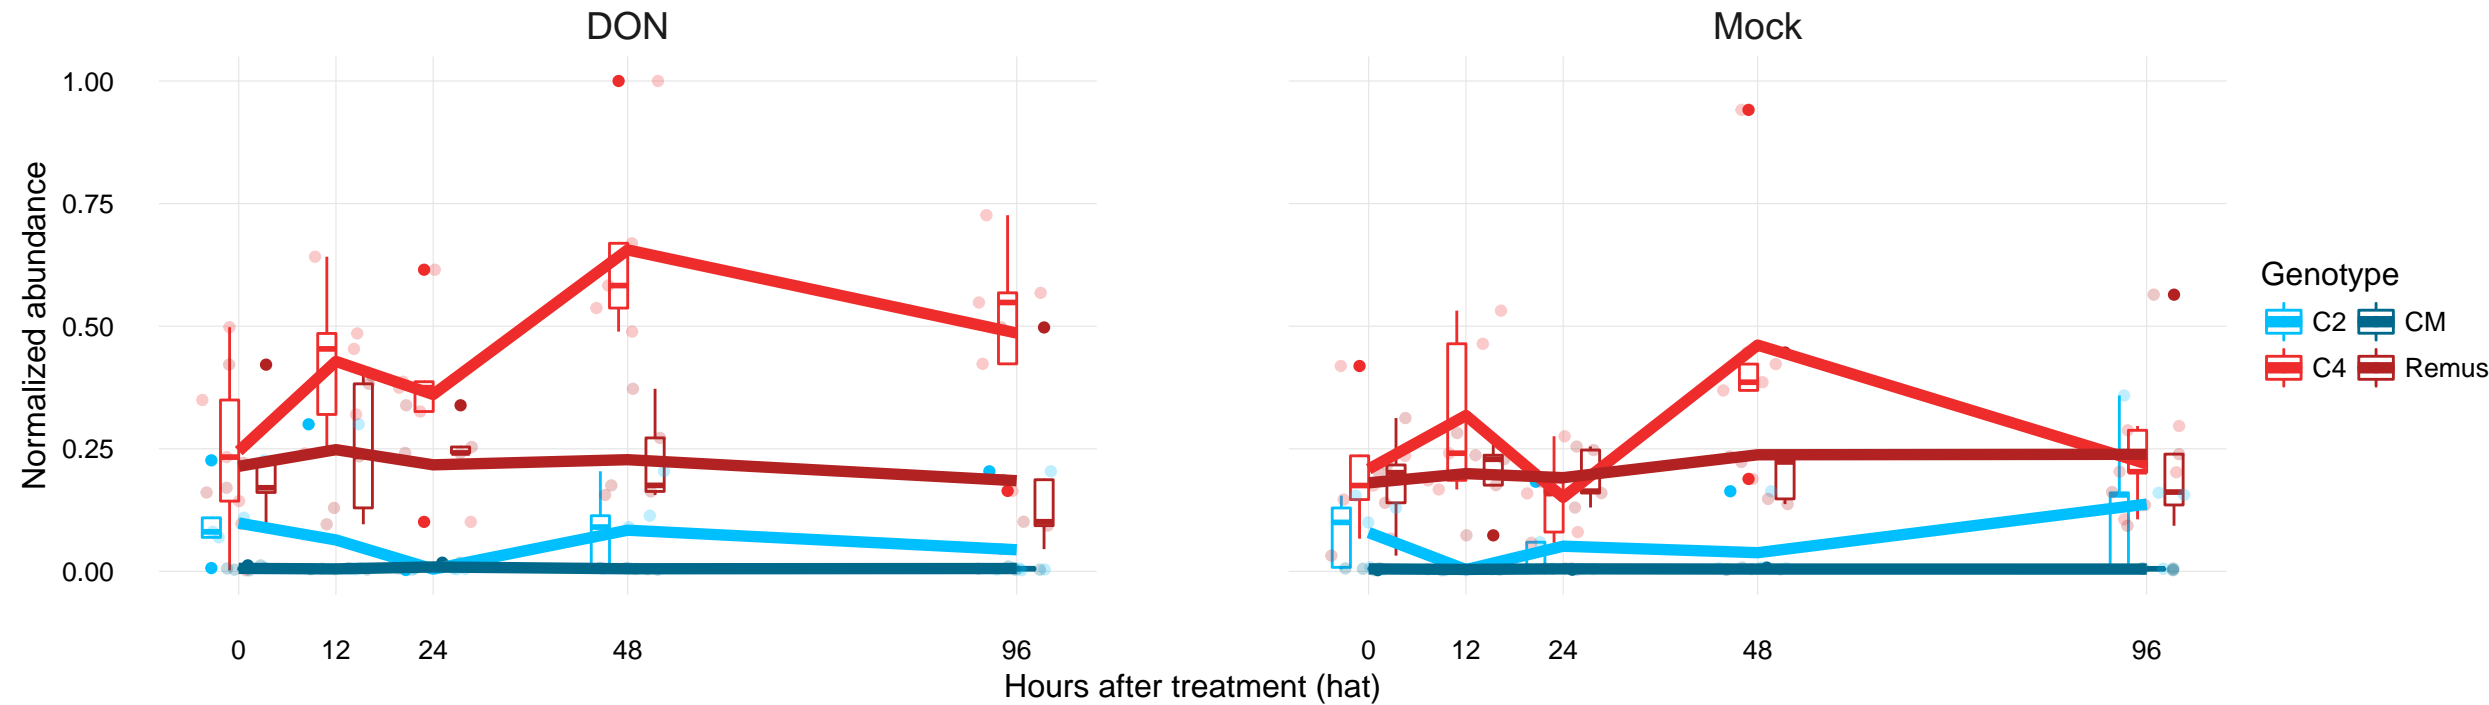



# A.70

Annotated as Flavonoid (diGlcF)  
(60 database hits)

|                |                          |
|----------------|--------------------------|
| MZ             | 625.1765                 |
| RT             | 13.46 min                |
| Normalization  | Directly via KPX samples |
| Cluster        | Cluster 4                |
| Cn total / Phe | 28 /                     |

## C2, C4; different treatments

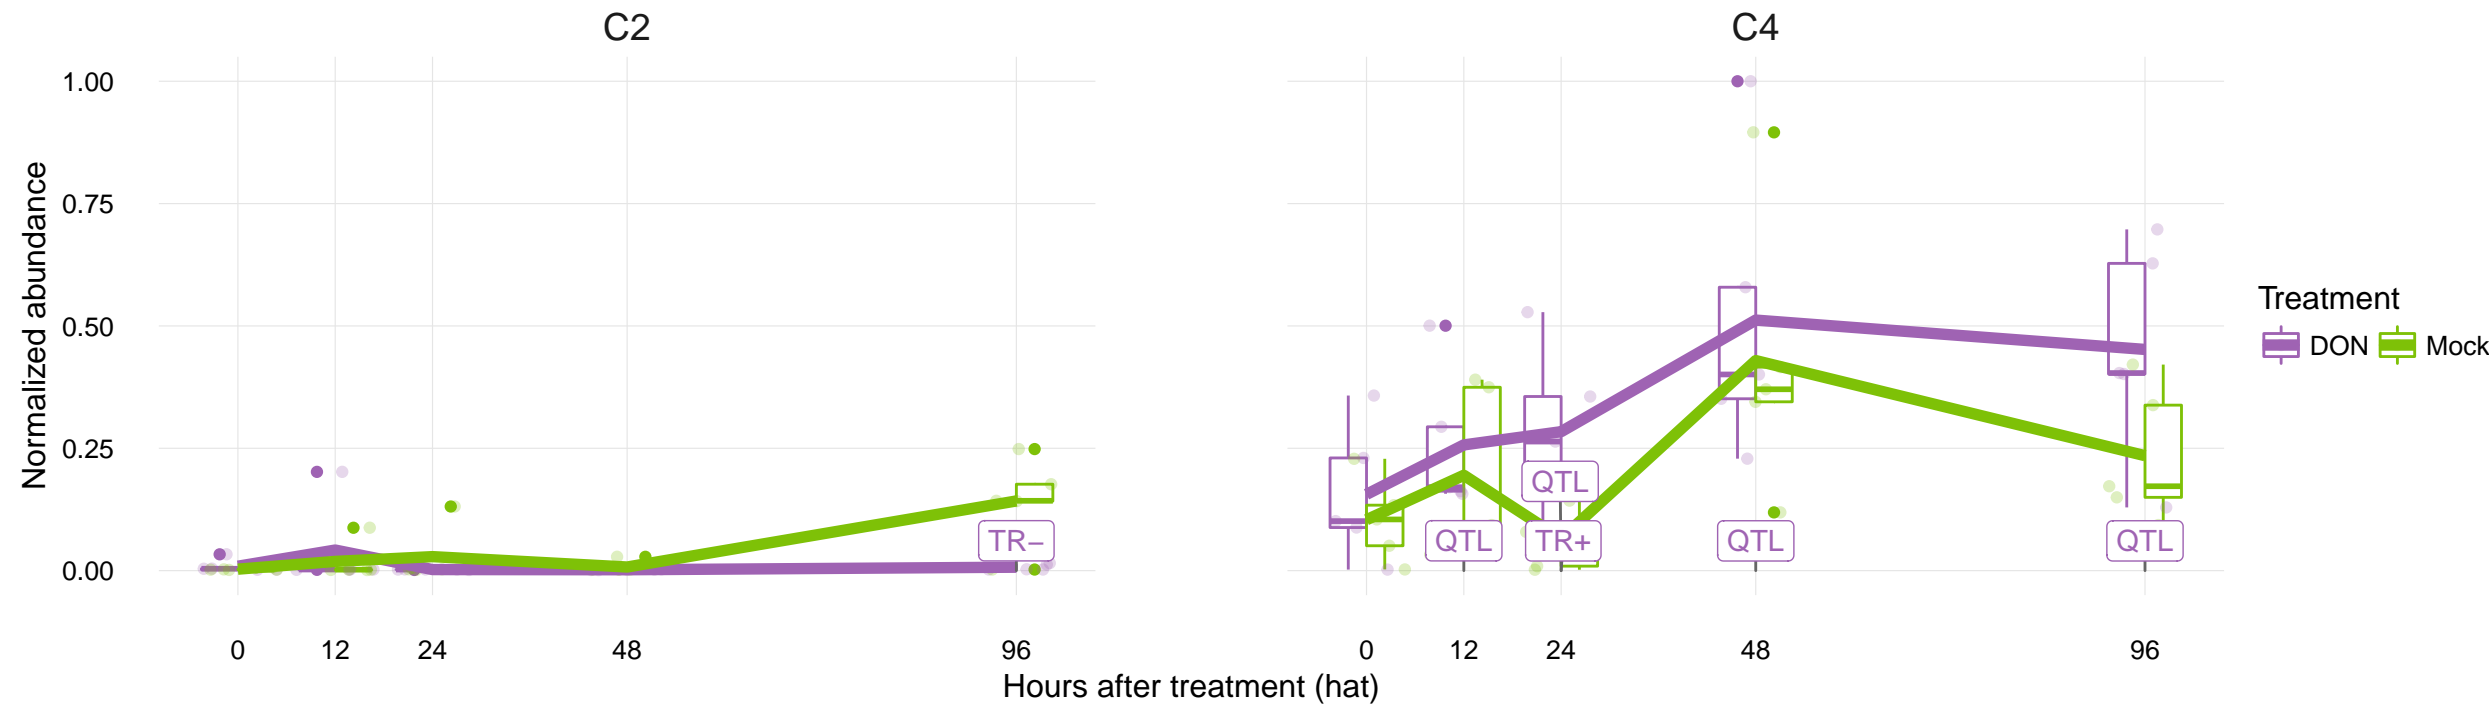

## DON, Mock; different genotypes

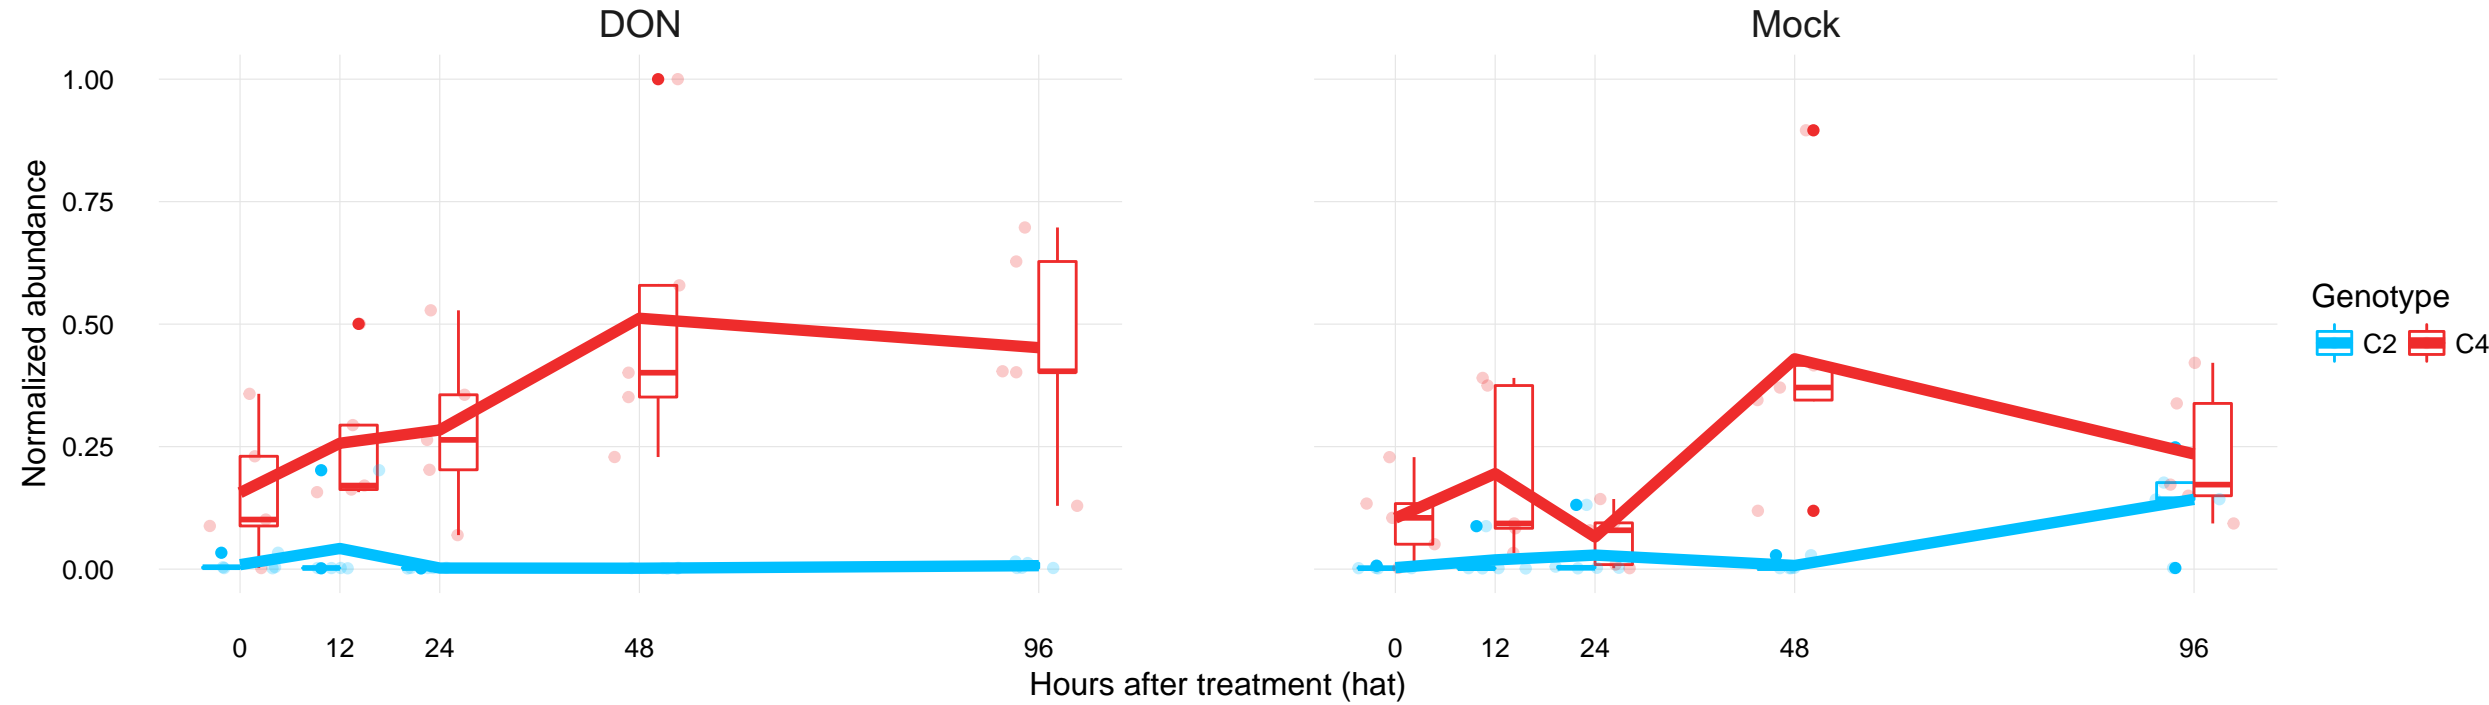

## CM, Remus; different treatments

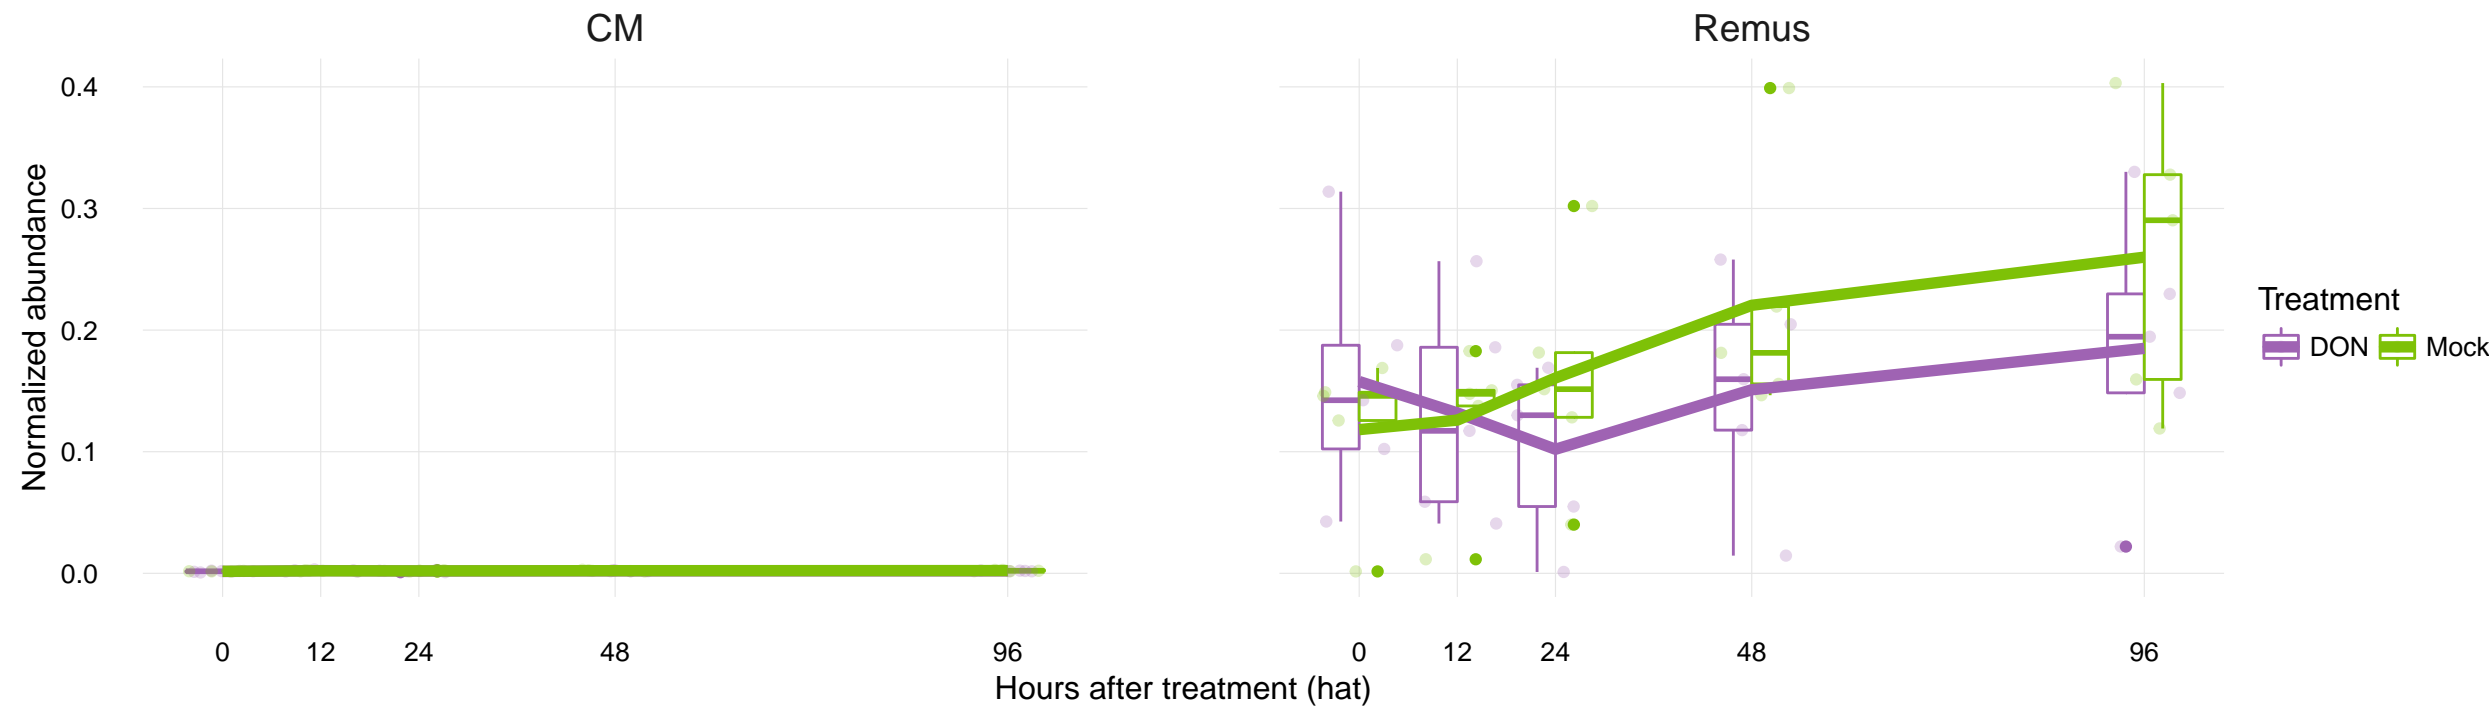

## DON, Mock; all four genotypes

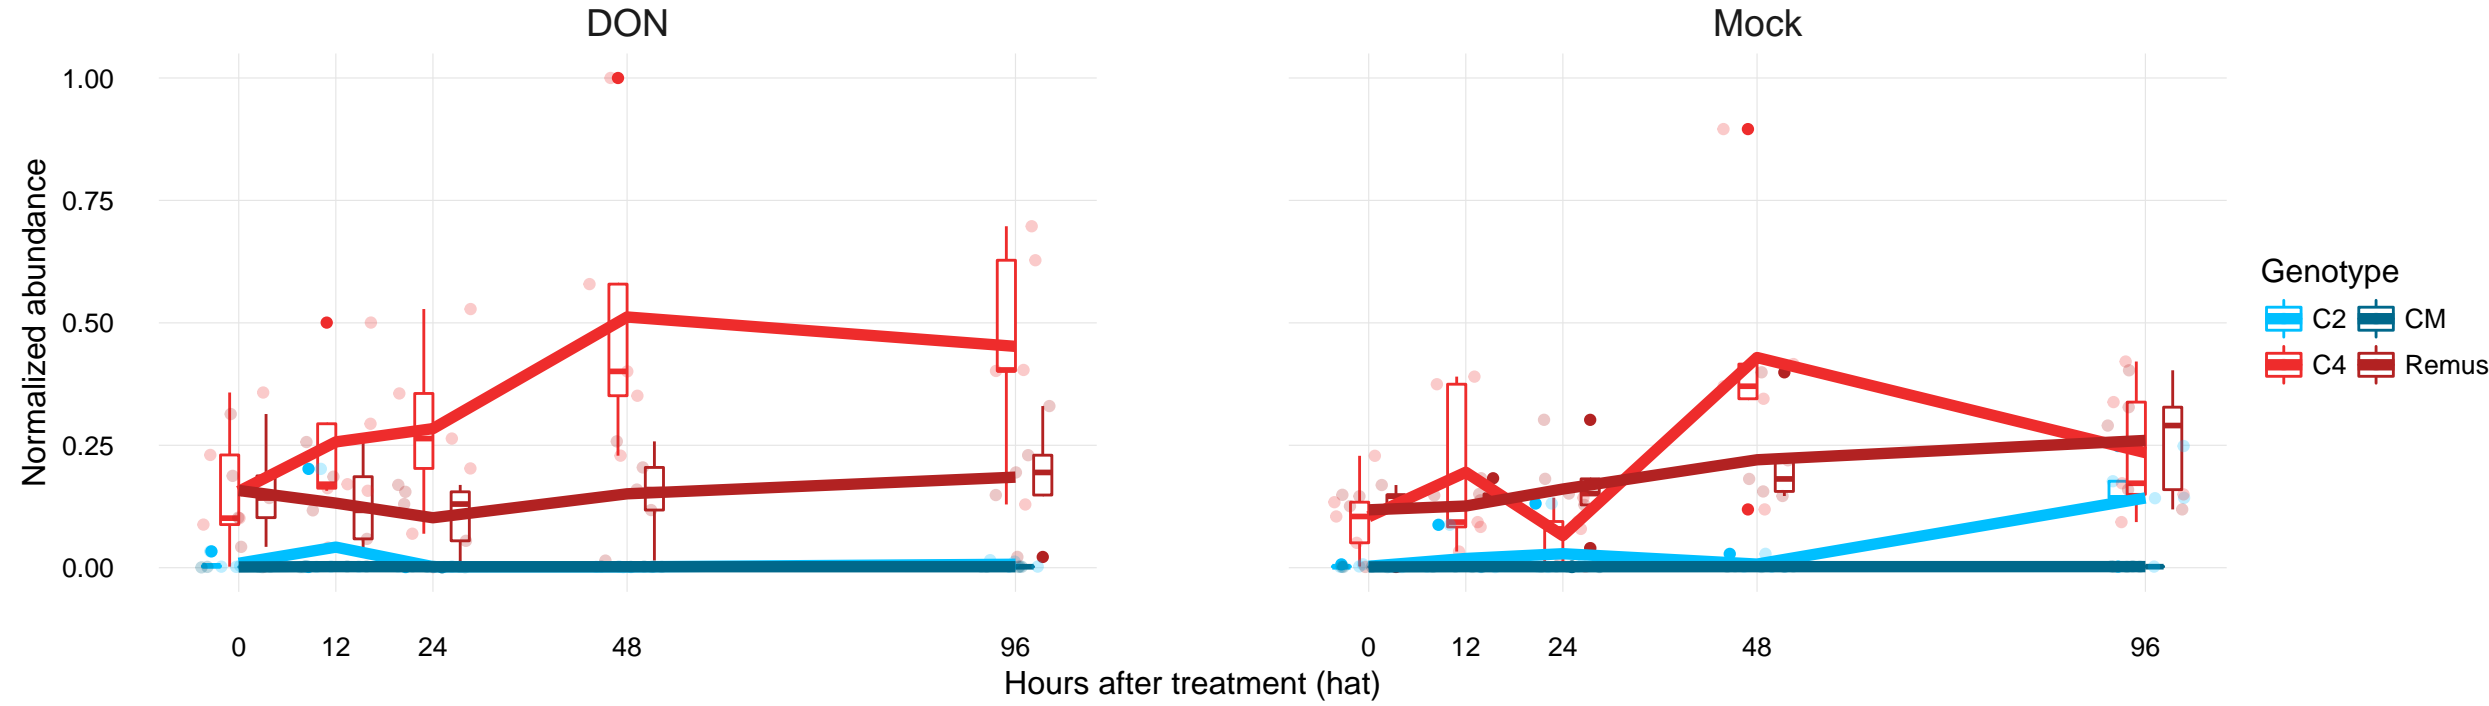



# A.55

Annotated as Flavonoid (diGlcF)  
(48 database hits)

|                |                          |
|----------------|--------------------------|
| MZ             | 581.1504                 |
| RT             | 12.58 min                |
| Normalization  | Directly via KPX samples |
| Cluster        | Cluster 4                |
| Cn total / Phe | 26 / 9                   |

## C2, C4; different treatments

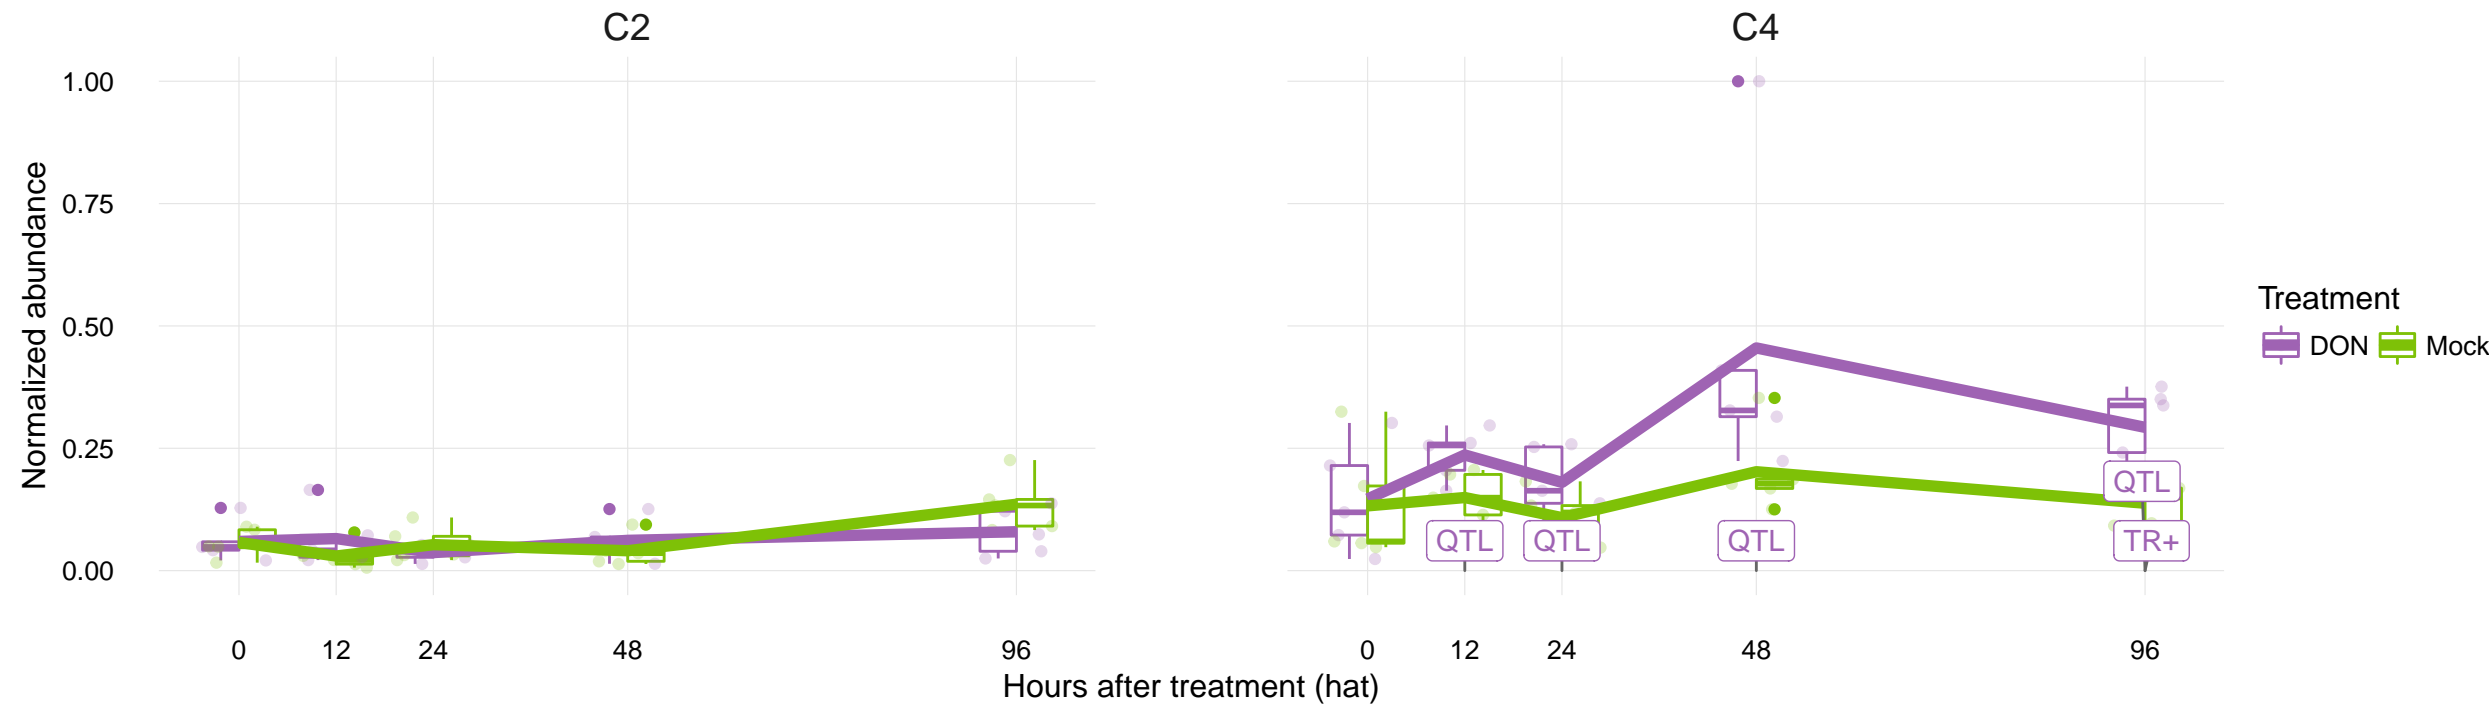

## DON, Mock; different genotypes

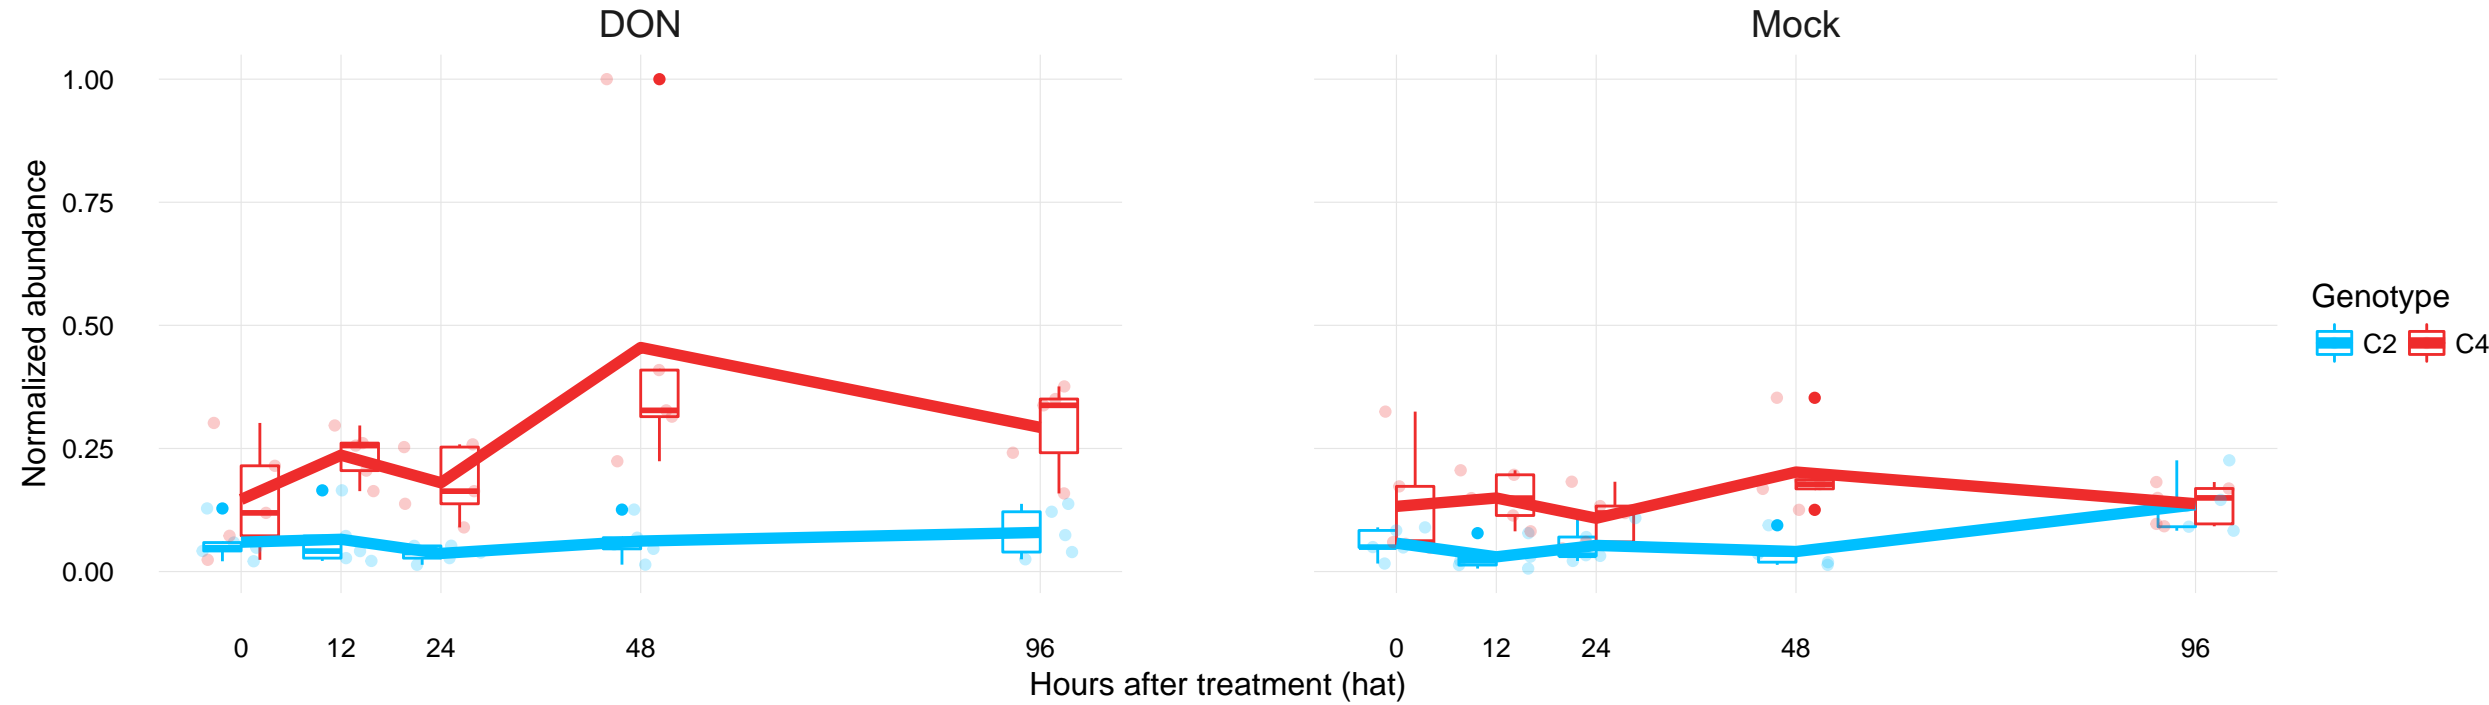

## CM, Remus; different treatments

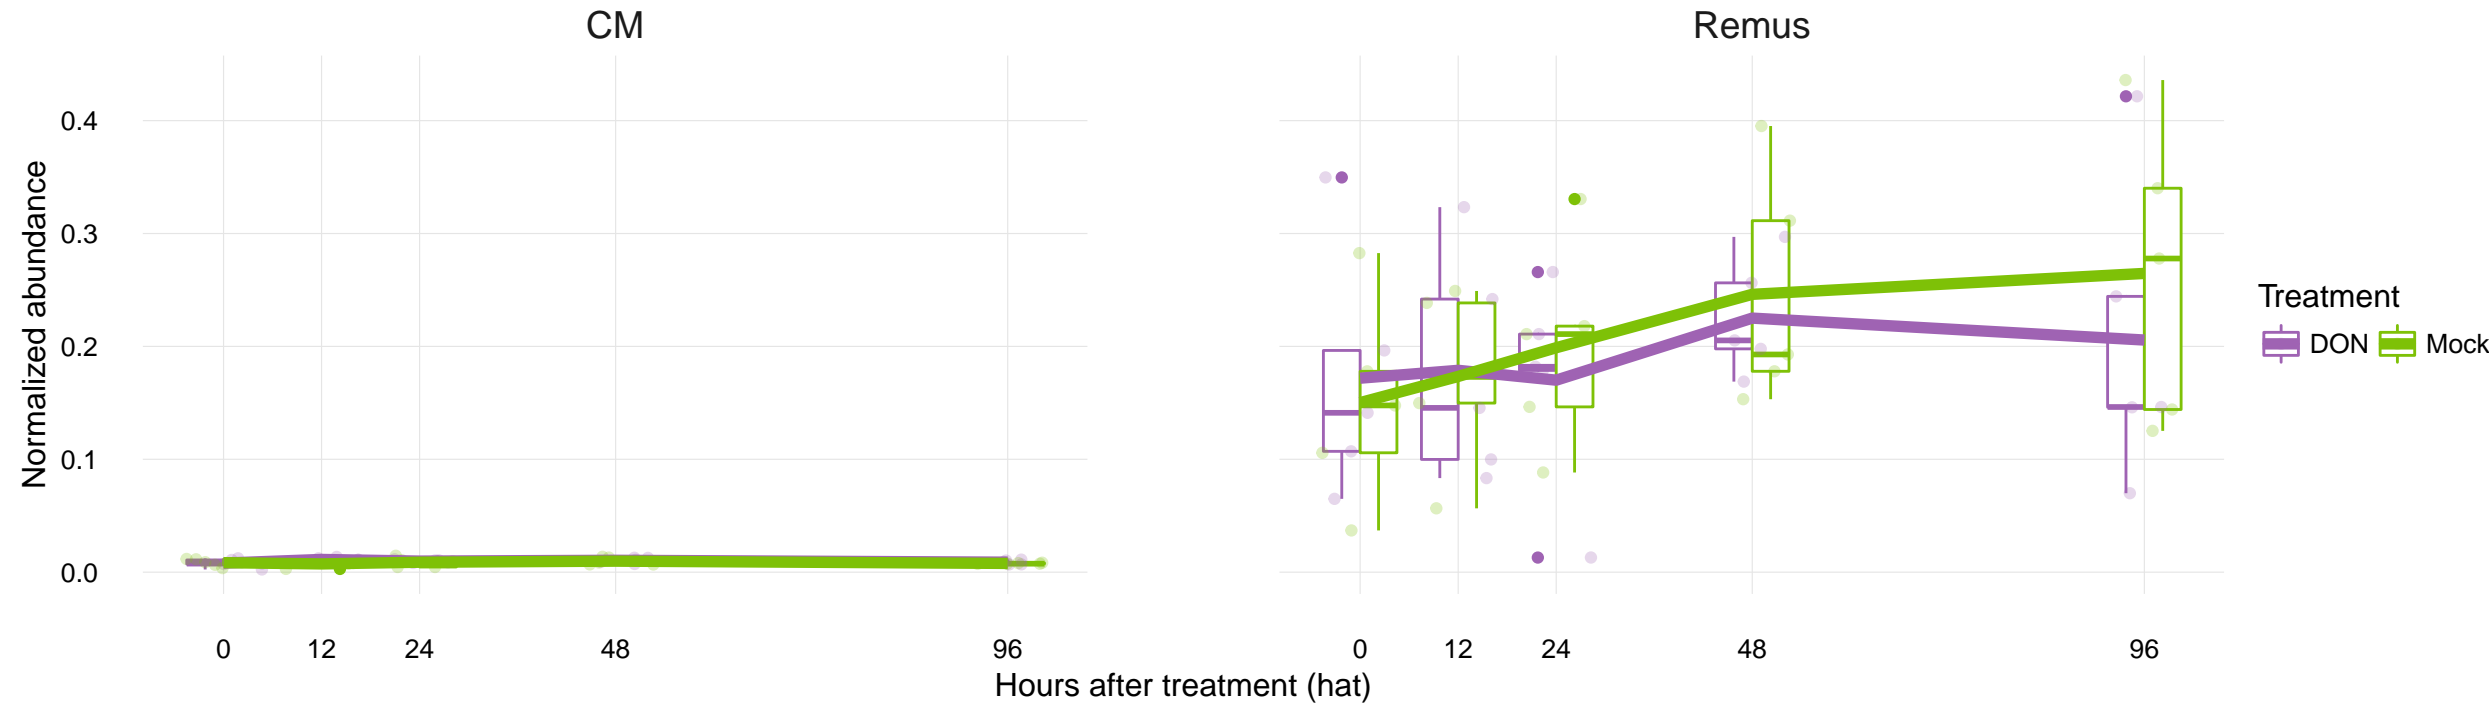

## DON, Mock; all four genotypes

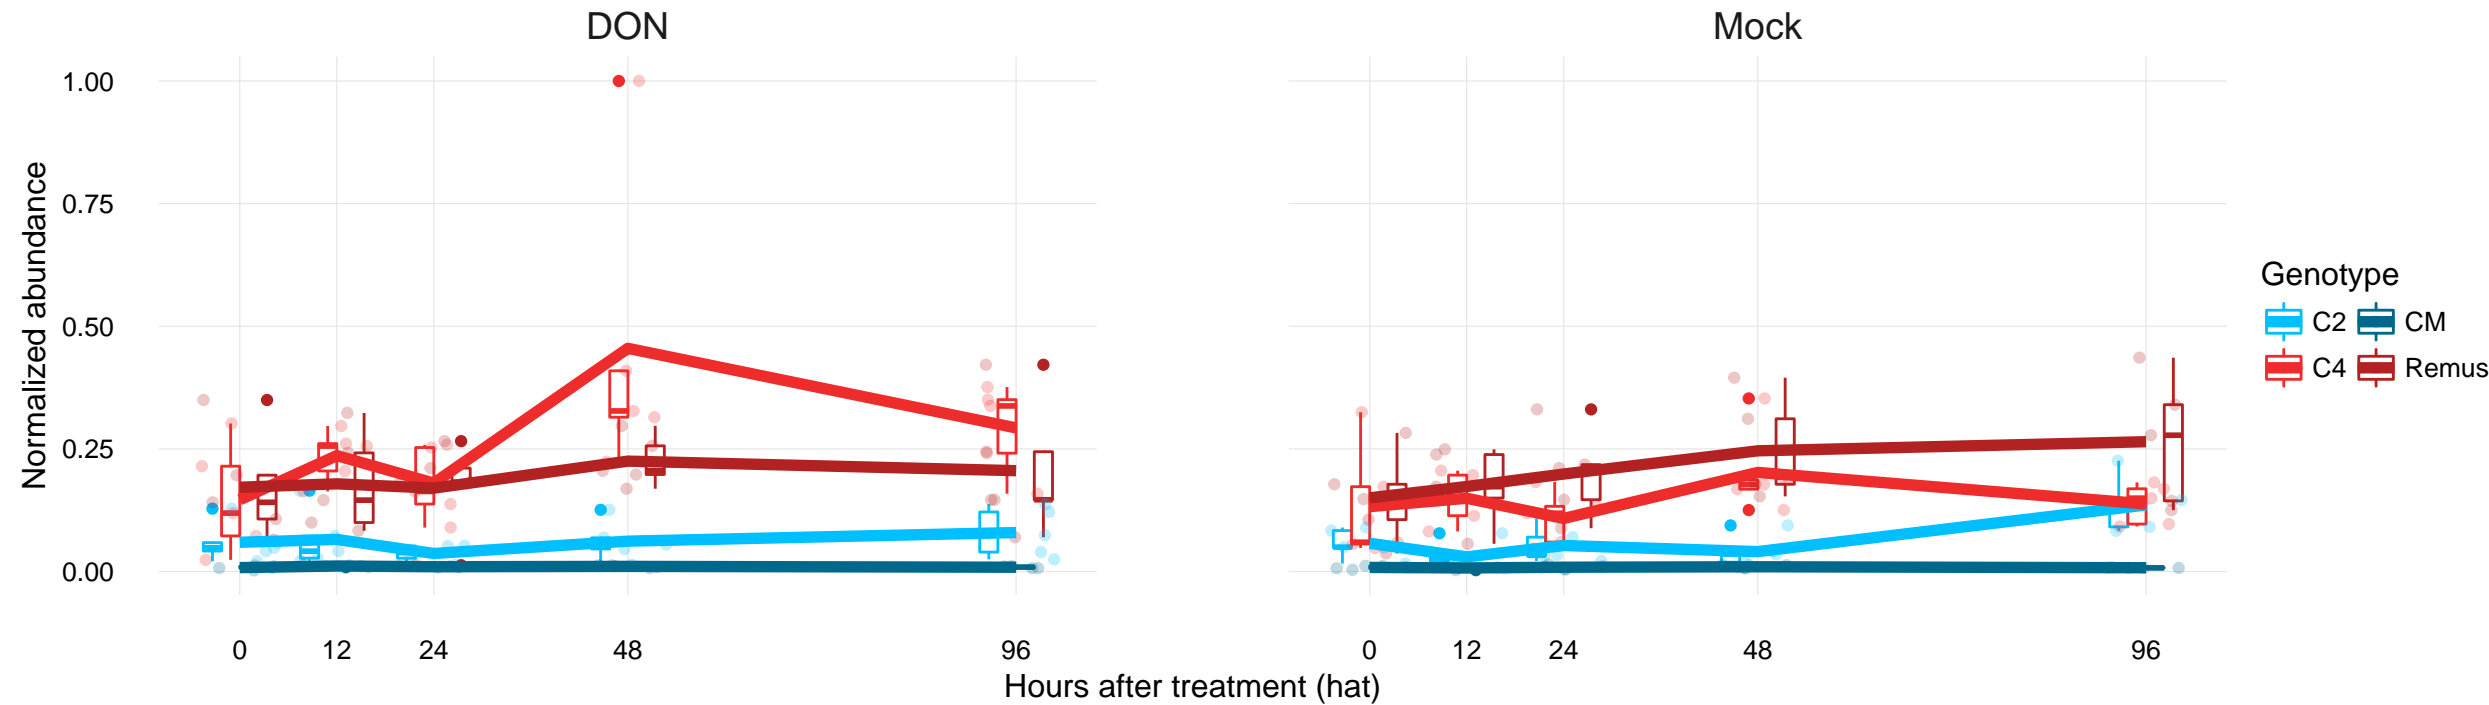

# A.81

Annotated as Flavonoid (GlcF)  
(52 database hits)

|                |                          |
|----------------|--------------------------|
| MZ             | 479.1188                 |
| RT             | 14.6 min                 |
| Normalization  | Directly via KPX samples |
| Cluster        | Cluster 4                |
| Cn total / Phe | 22 /                     |

## C2, C4; different treatments

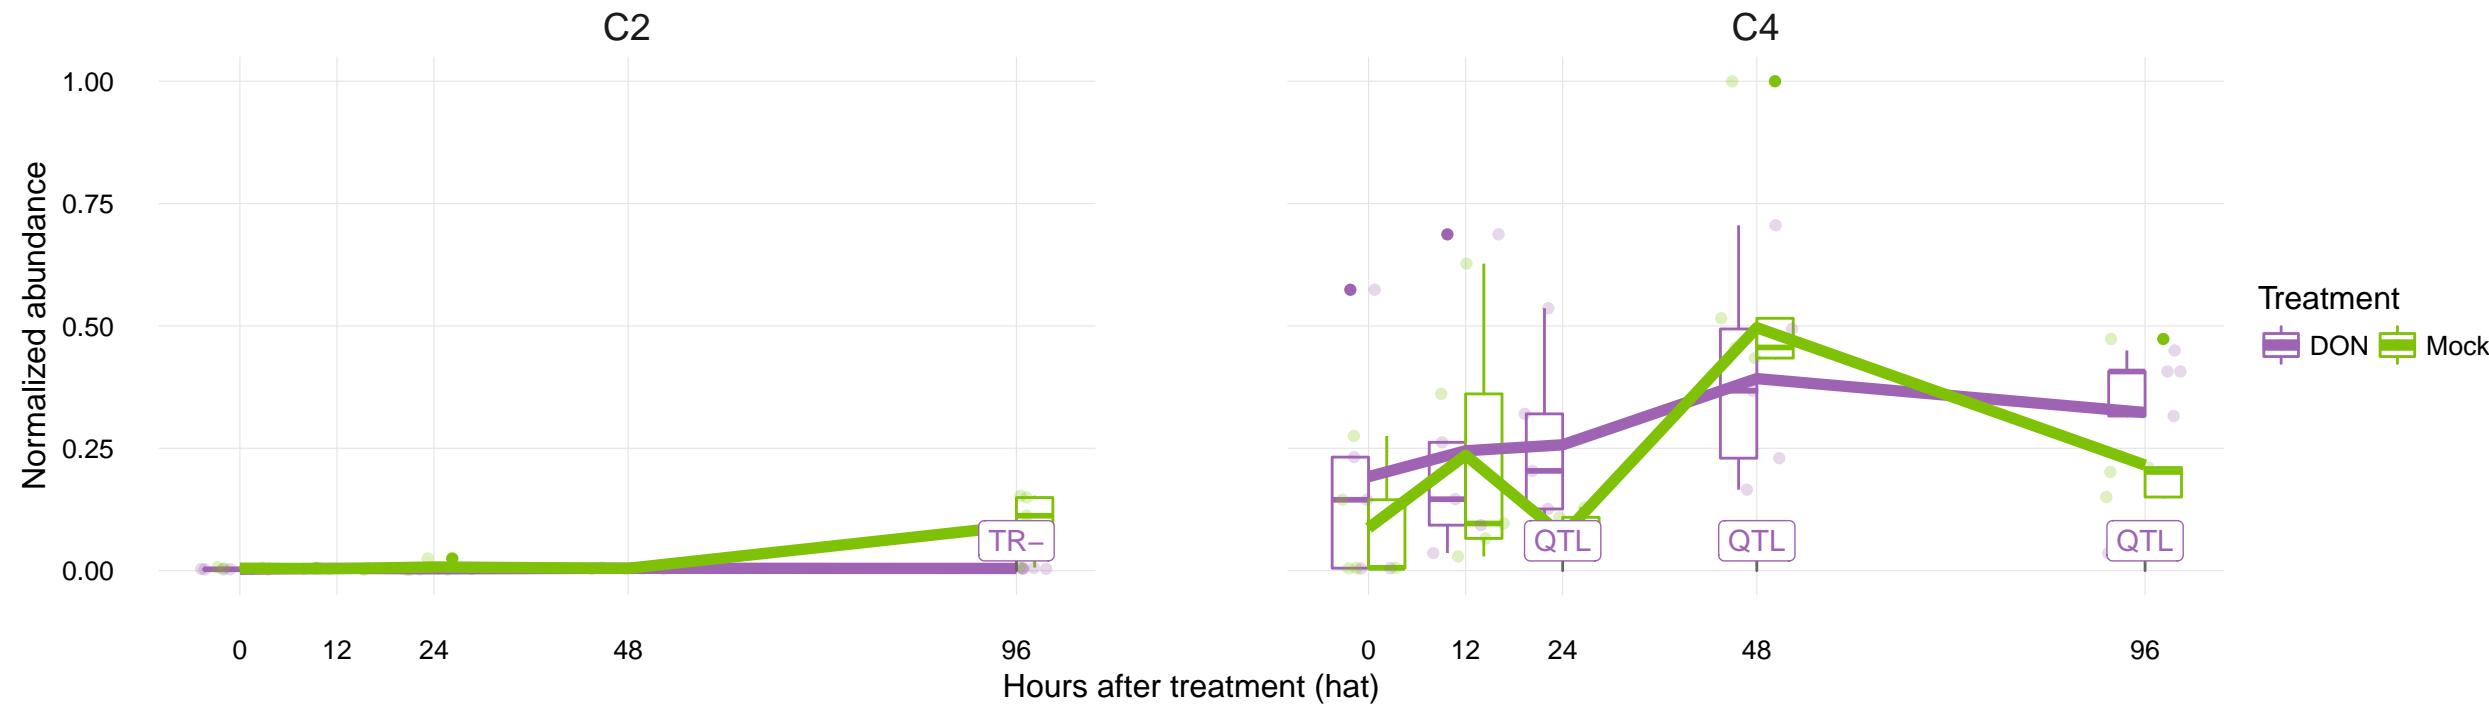

## DON, Mock; different genotypes

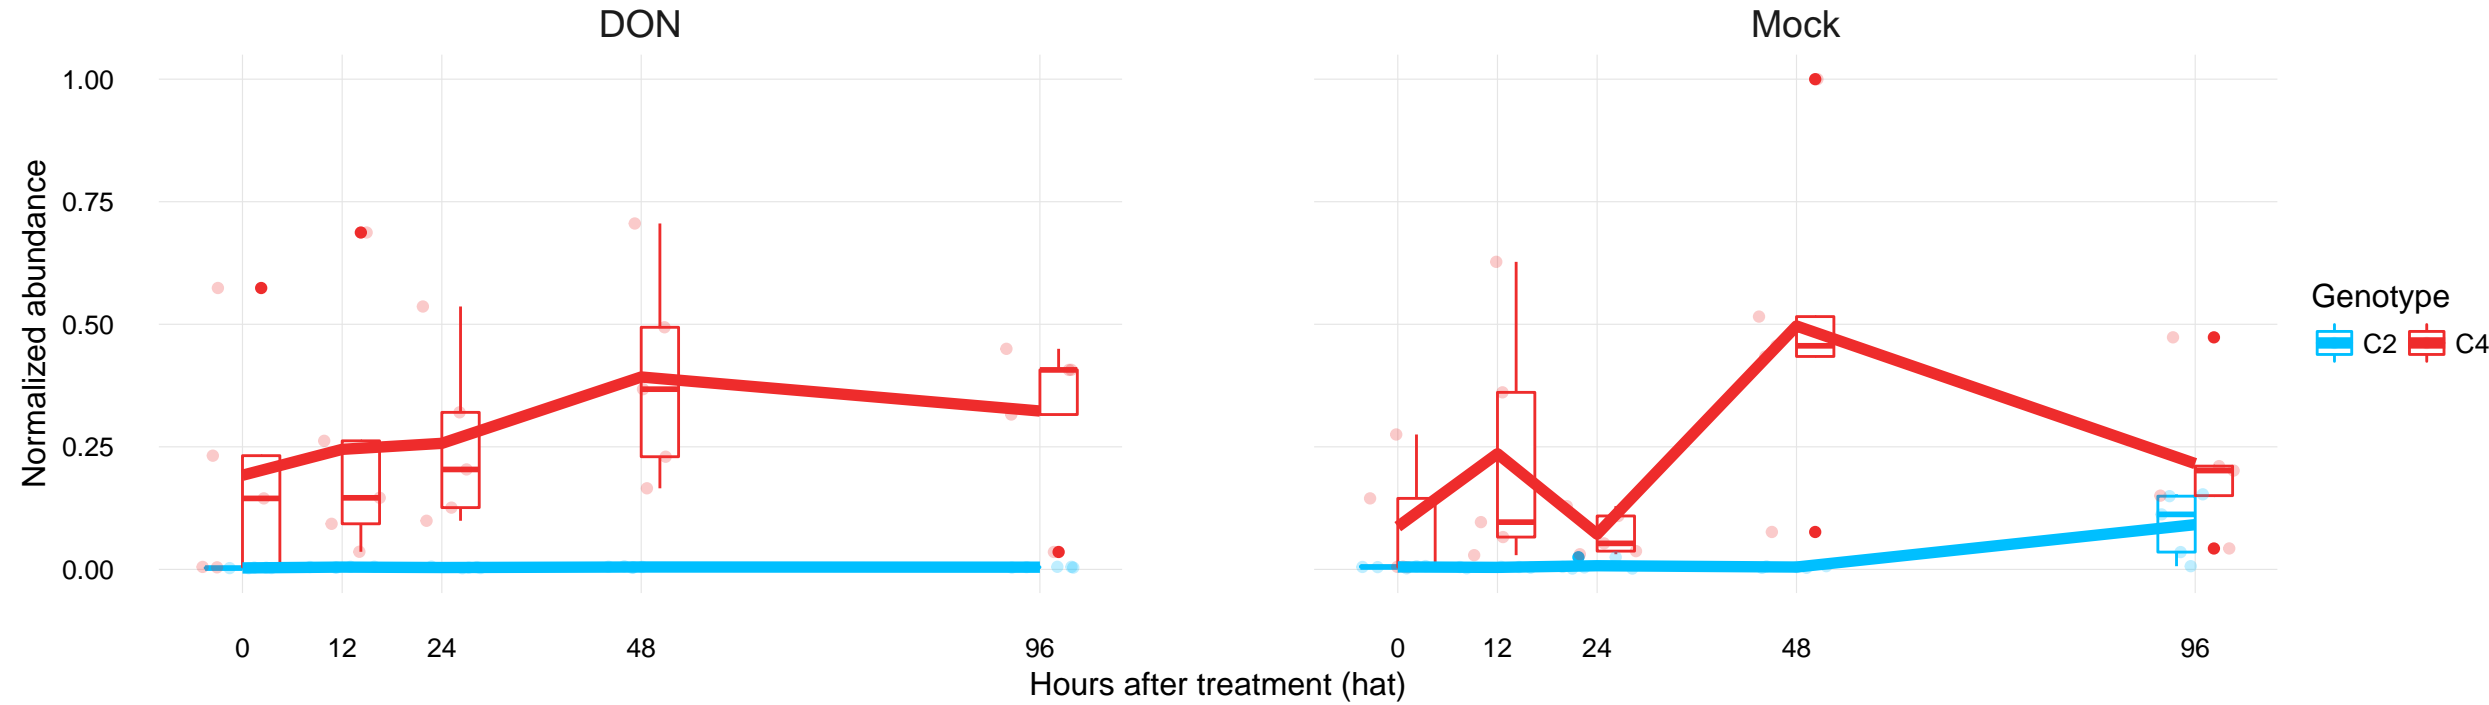

## CM, Remus; different treatments

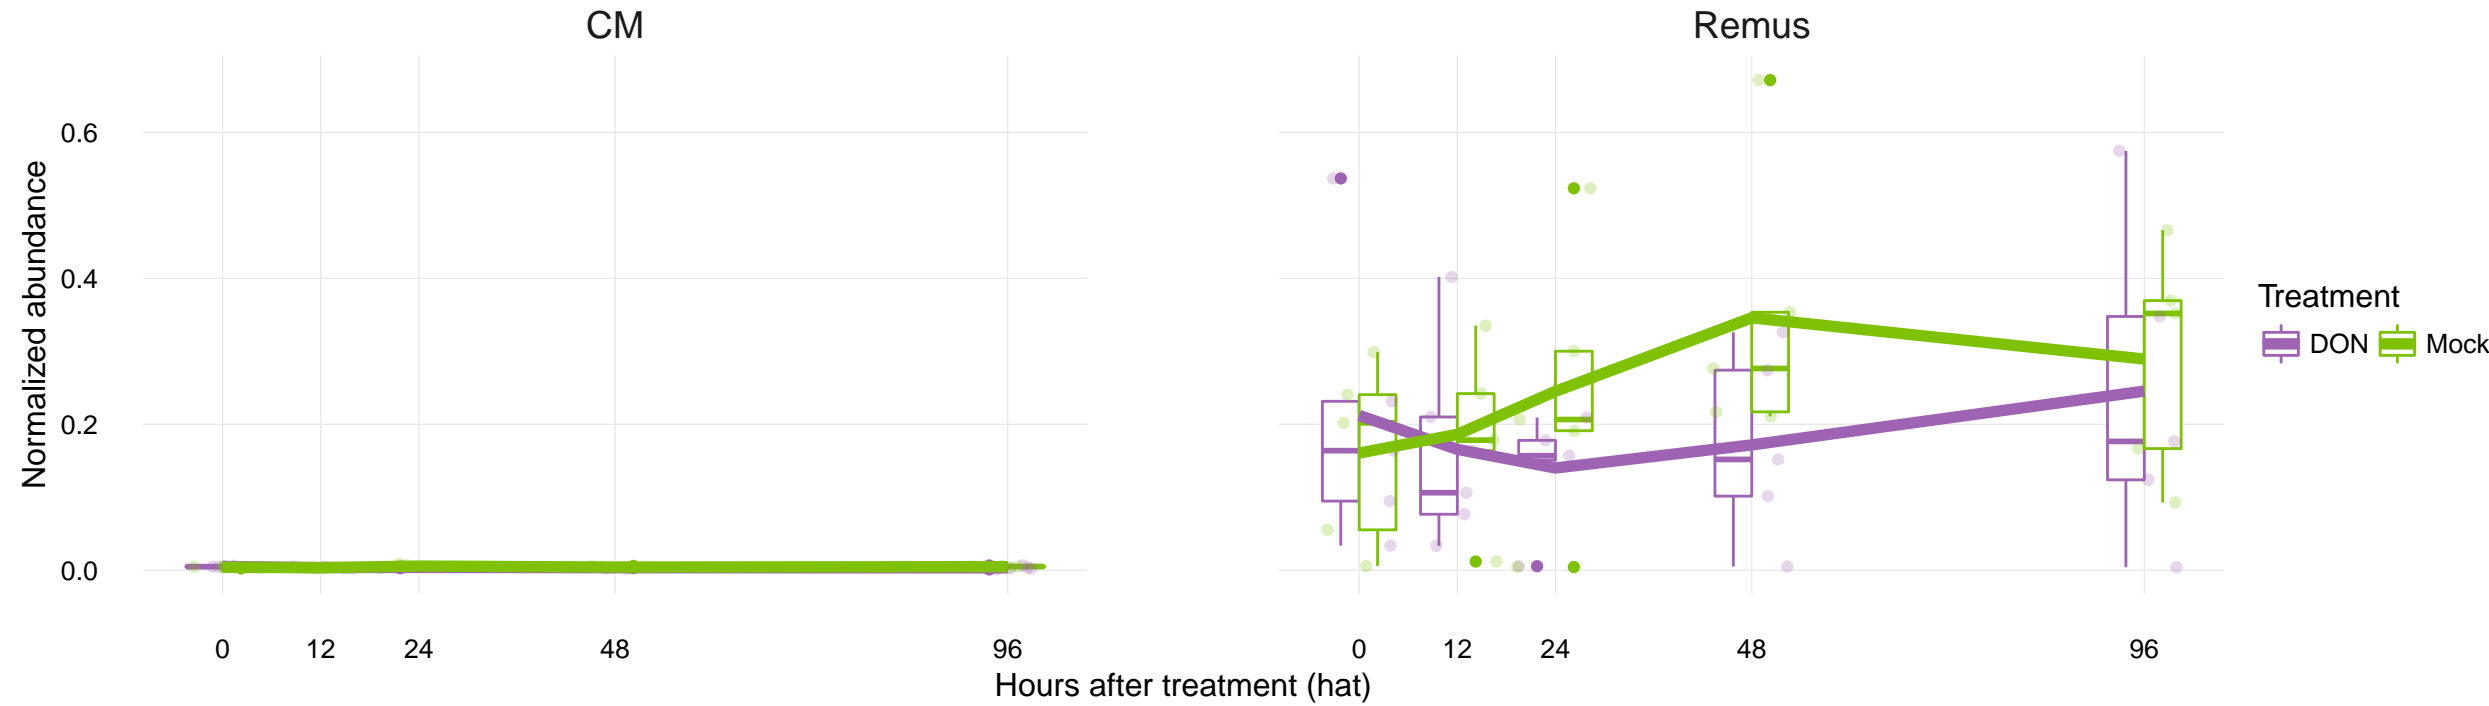

## DON, Mock; all four genotypes

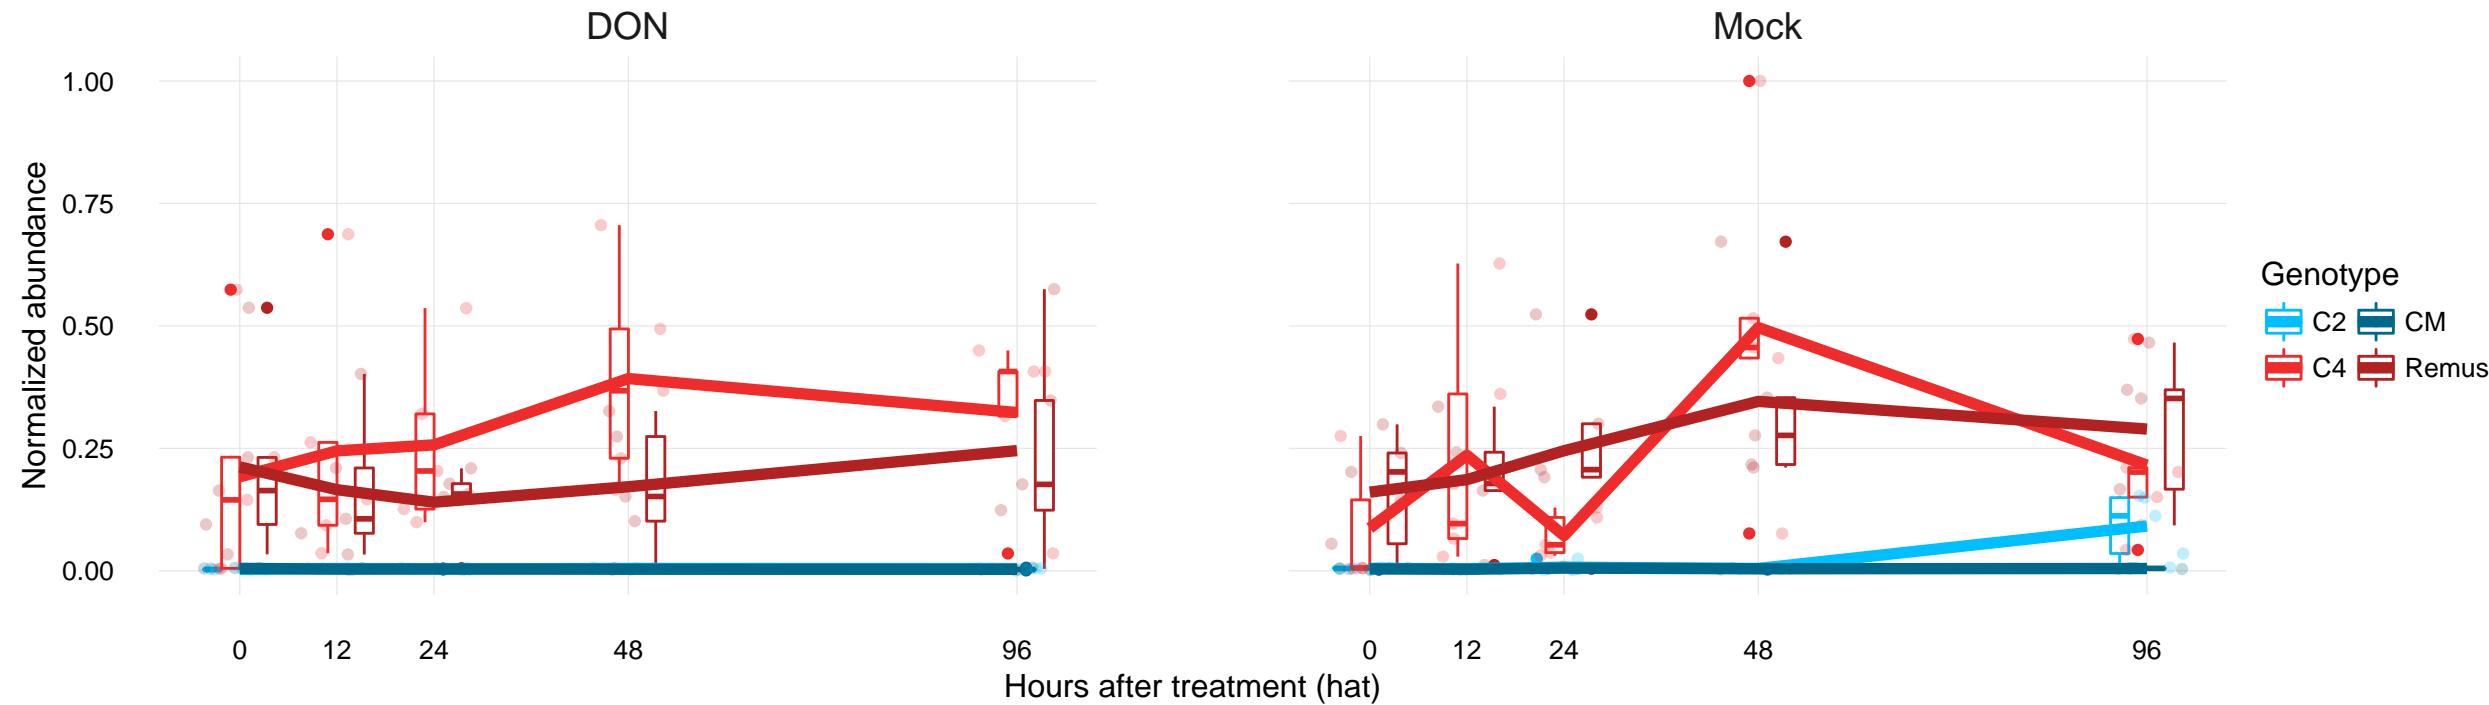

# U.9

Unknown Phe-derived wheat-metabolite

|                |                          |
|----------------|--------------------------|
| MZ             | 584.1288                 |
| RT             | 13.44 min                |
| Normalization  | Directly via KPX samples |
| Cluster        | Cluster 4                |
| Cn total / Phe | 8 / 8                    |

C2, C4; different treatments

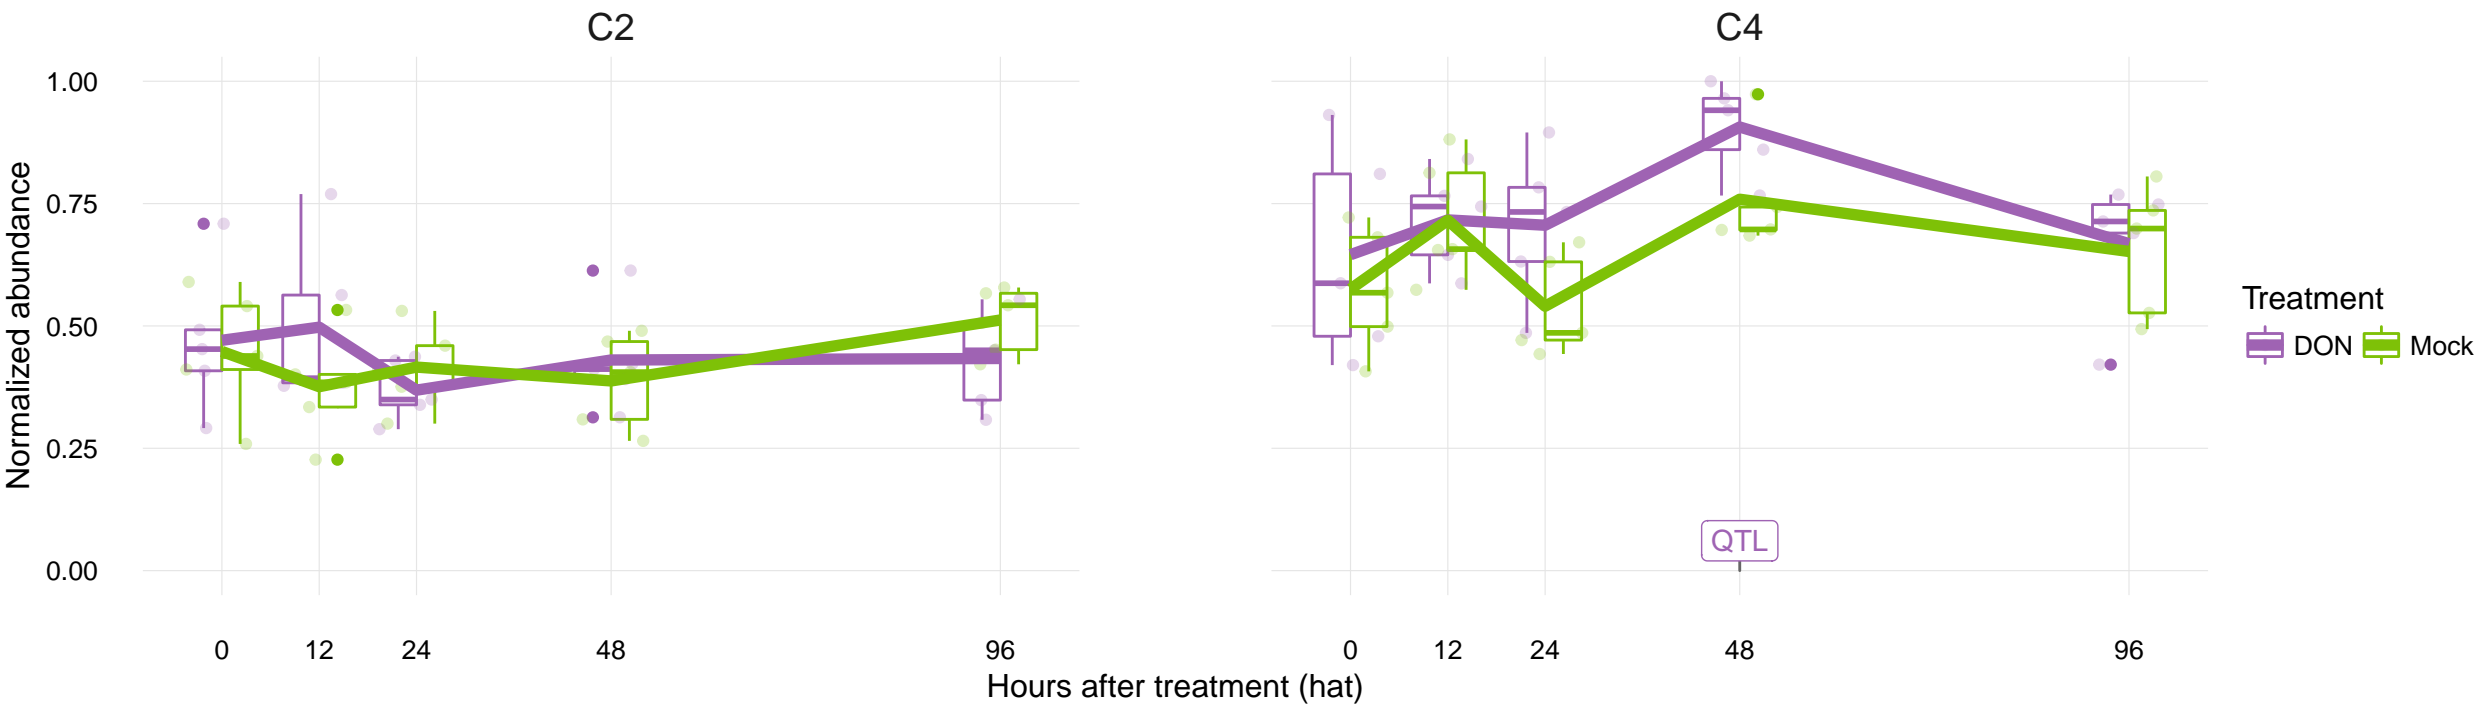

DON, Mock; different genotypes

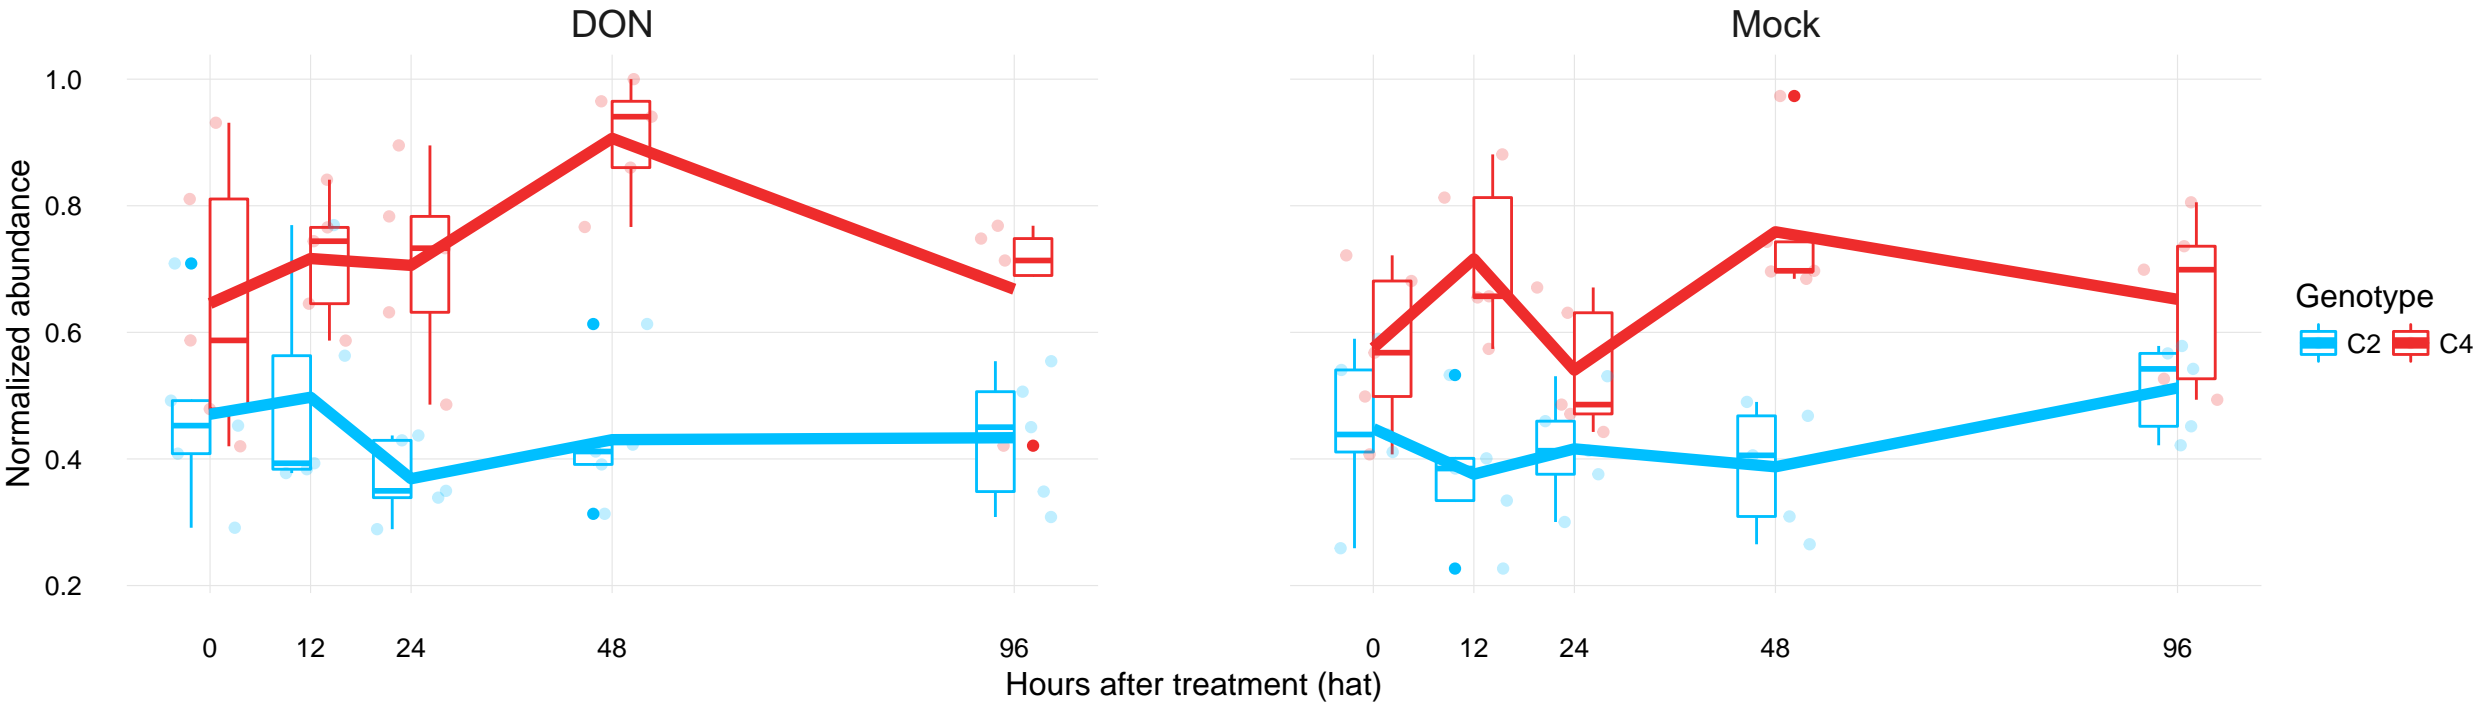

CM, Remus; different treatments

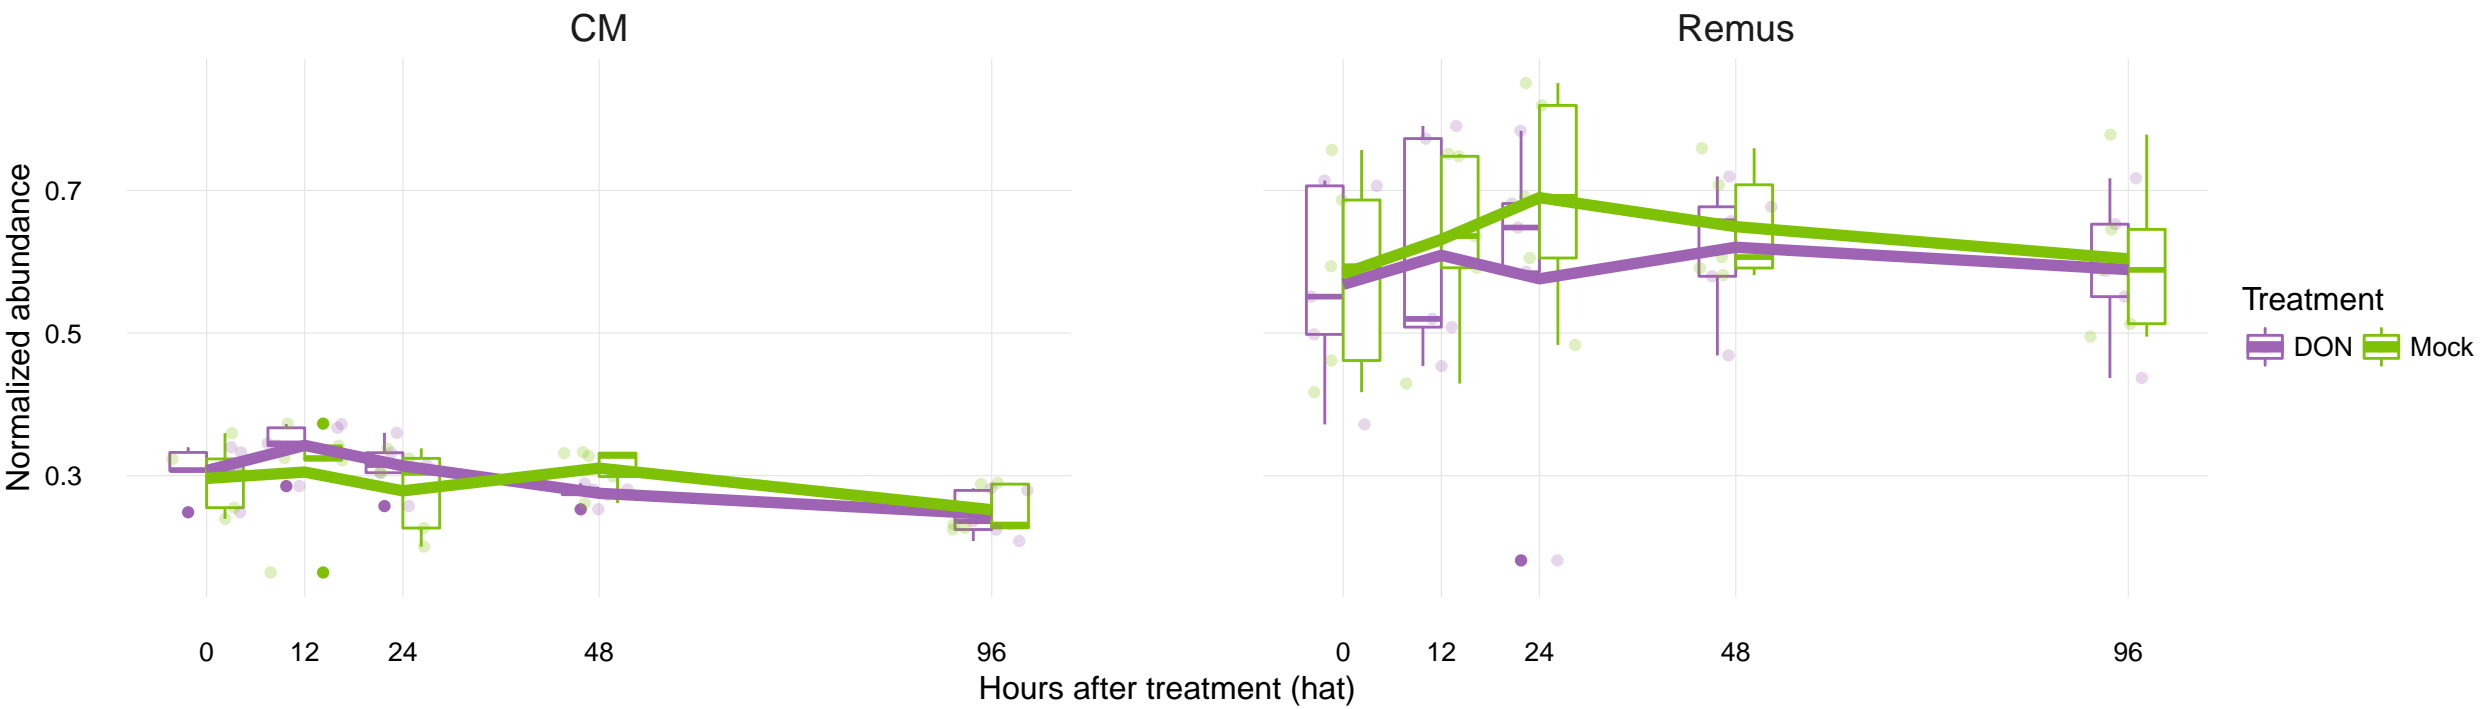

DON, Mock; all four genotypes

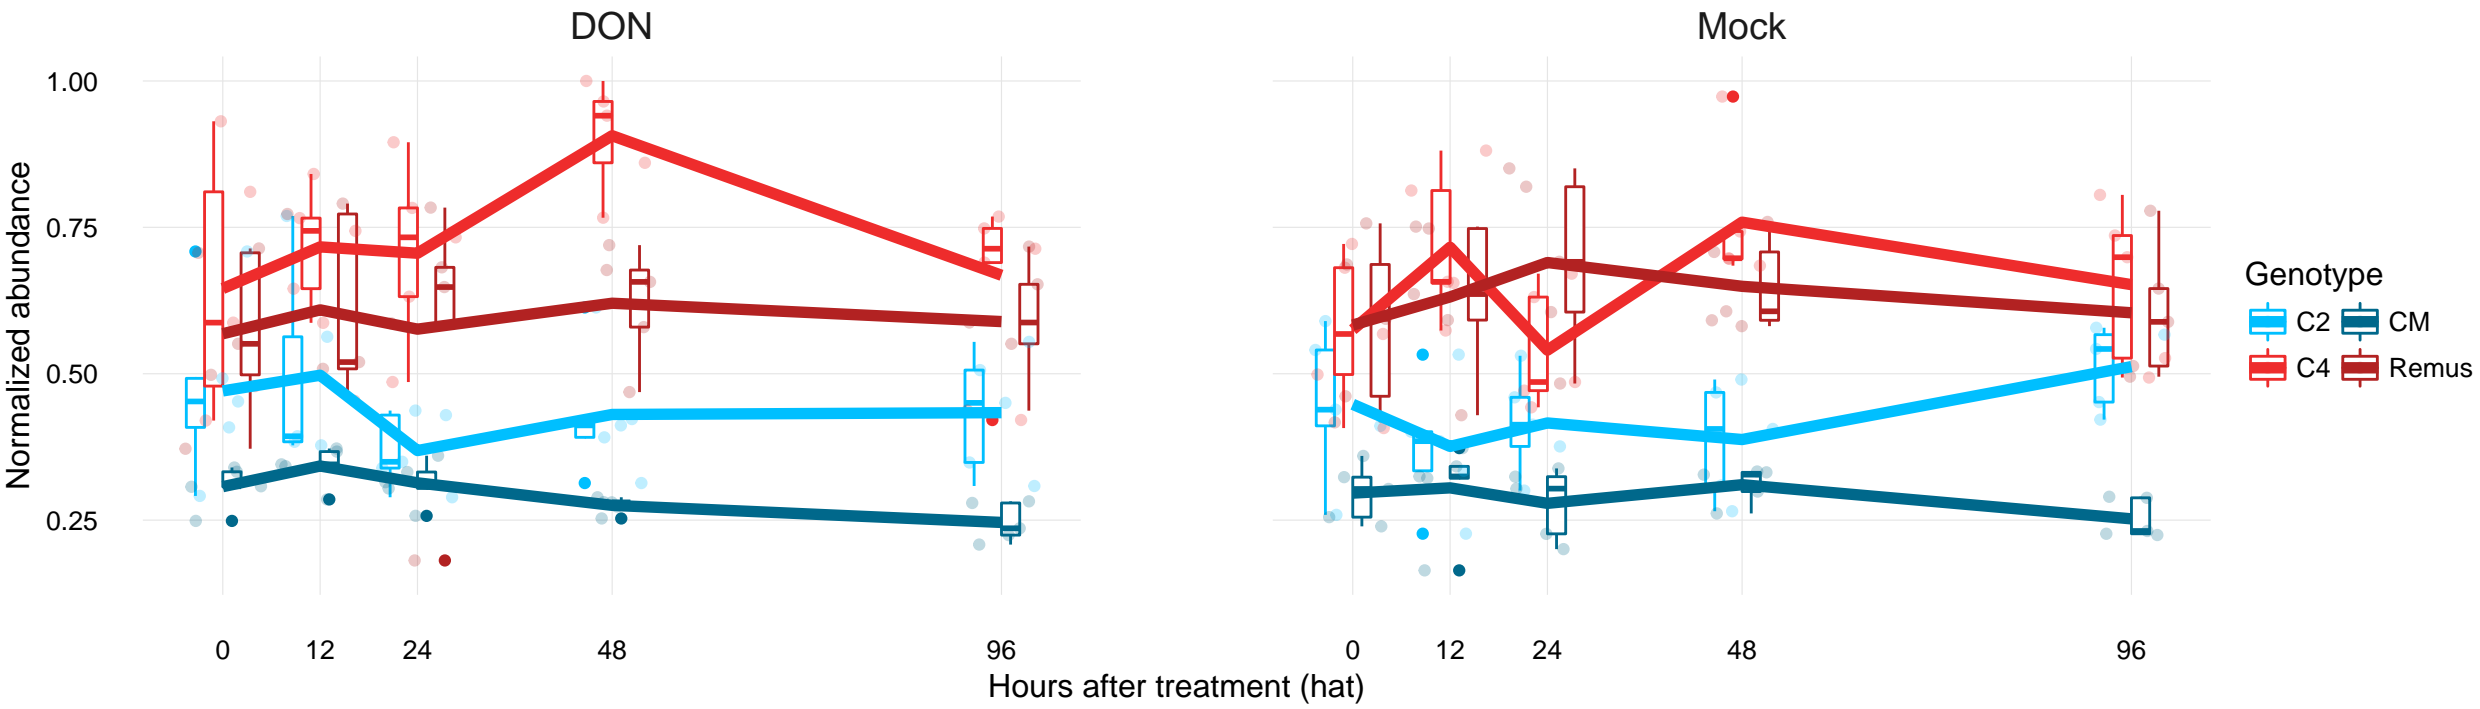

# A.95

Annotated as Putative phenylacetic acid derivative  
(2 database hits)

|                |                                                |
|----------------|------------------------------------------------|
| MZ             | 388.1605                                       |
| RT             | 16.26 min                                      |
| Normalization  | Indirectly via surrogate<br>in the KPX samples |
| Cluster        | Cluster 4                                      |
| Cn total / Phe | 17 / 8                                         |

## C2, C4; different treatments

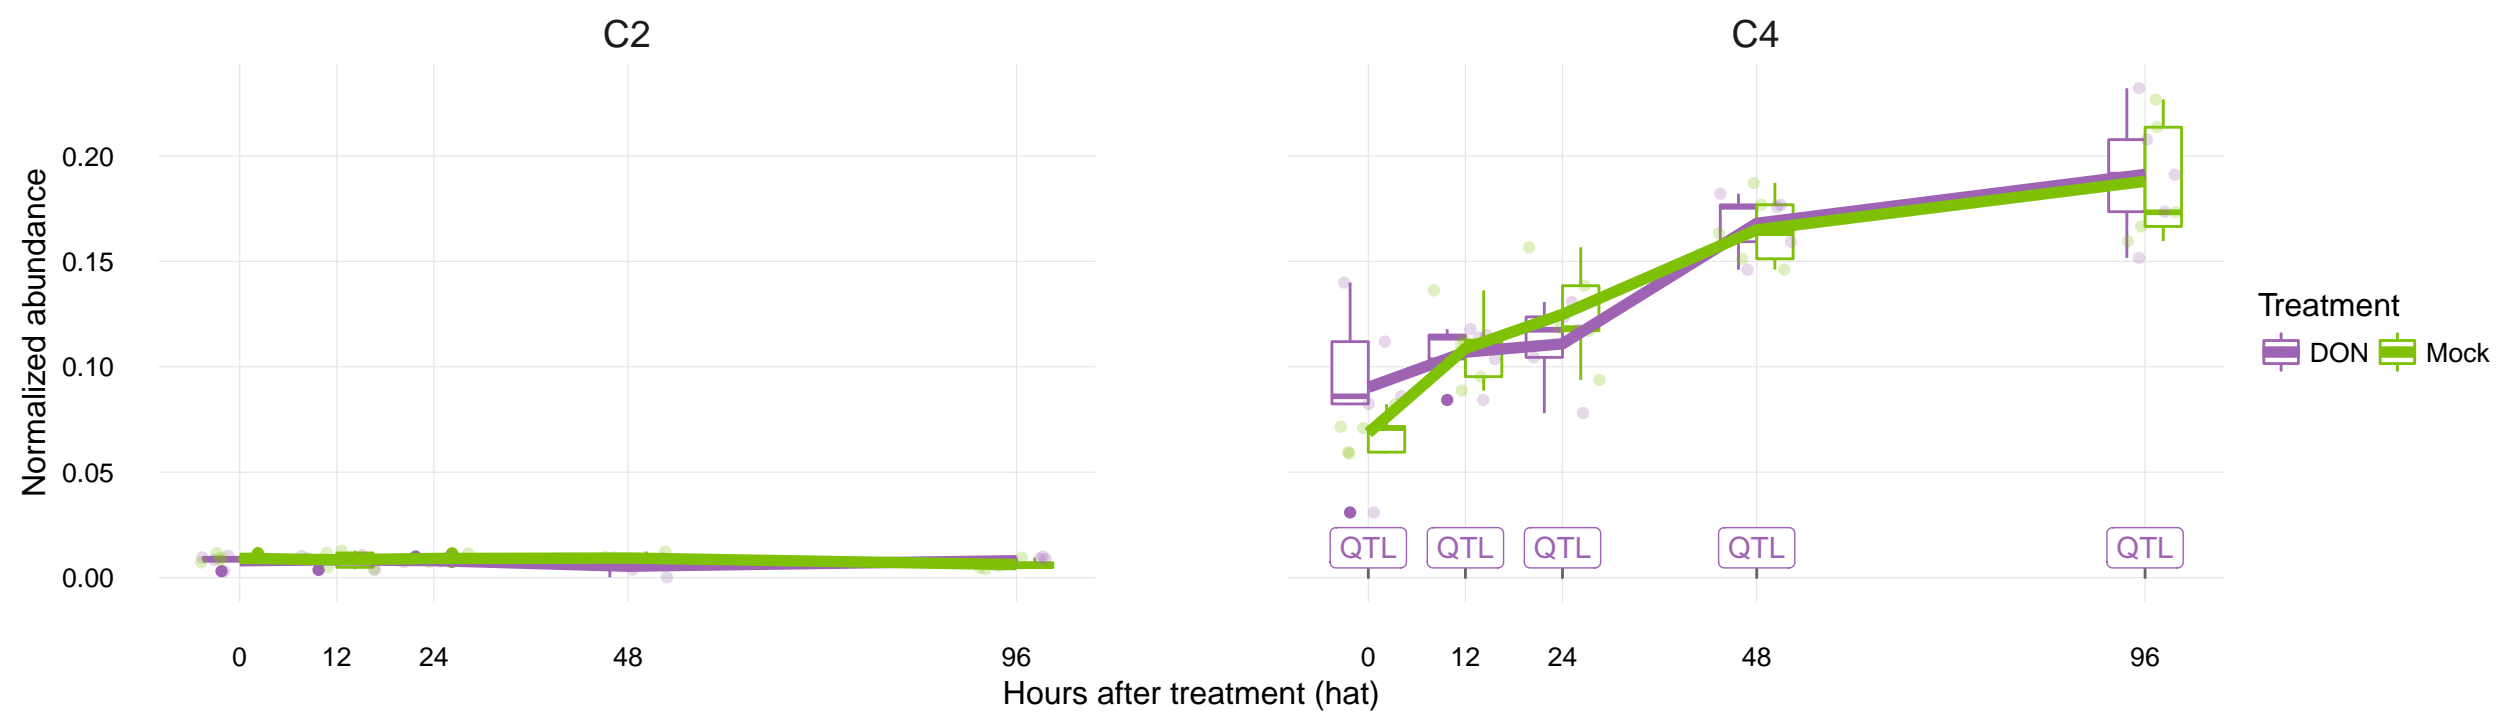

## DON, Mock; different genotypes

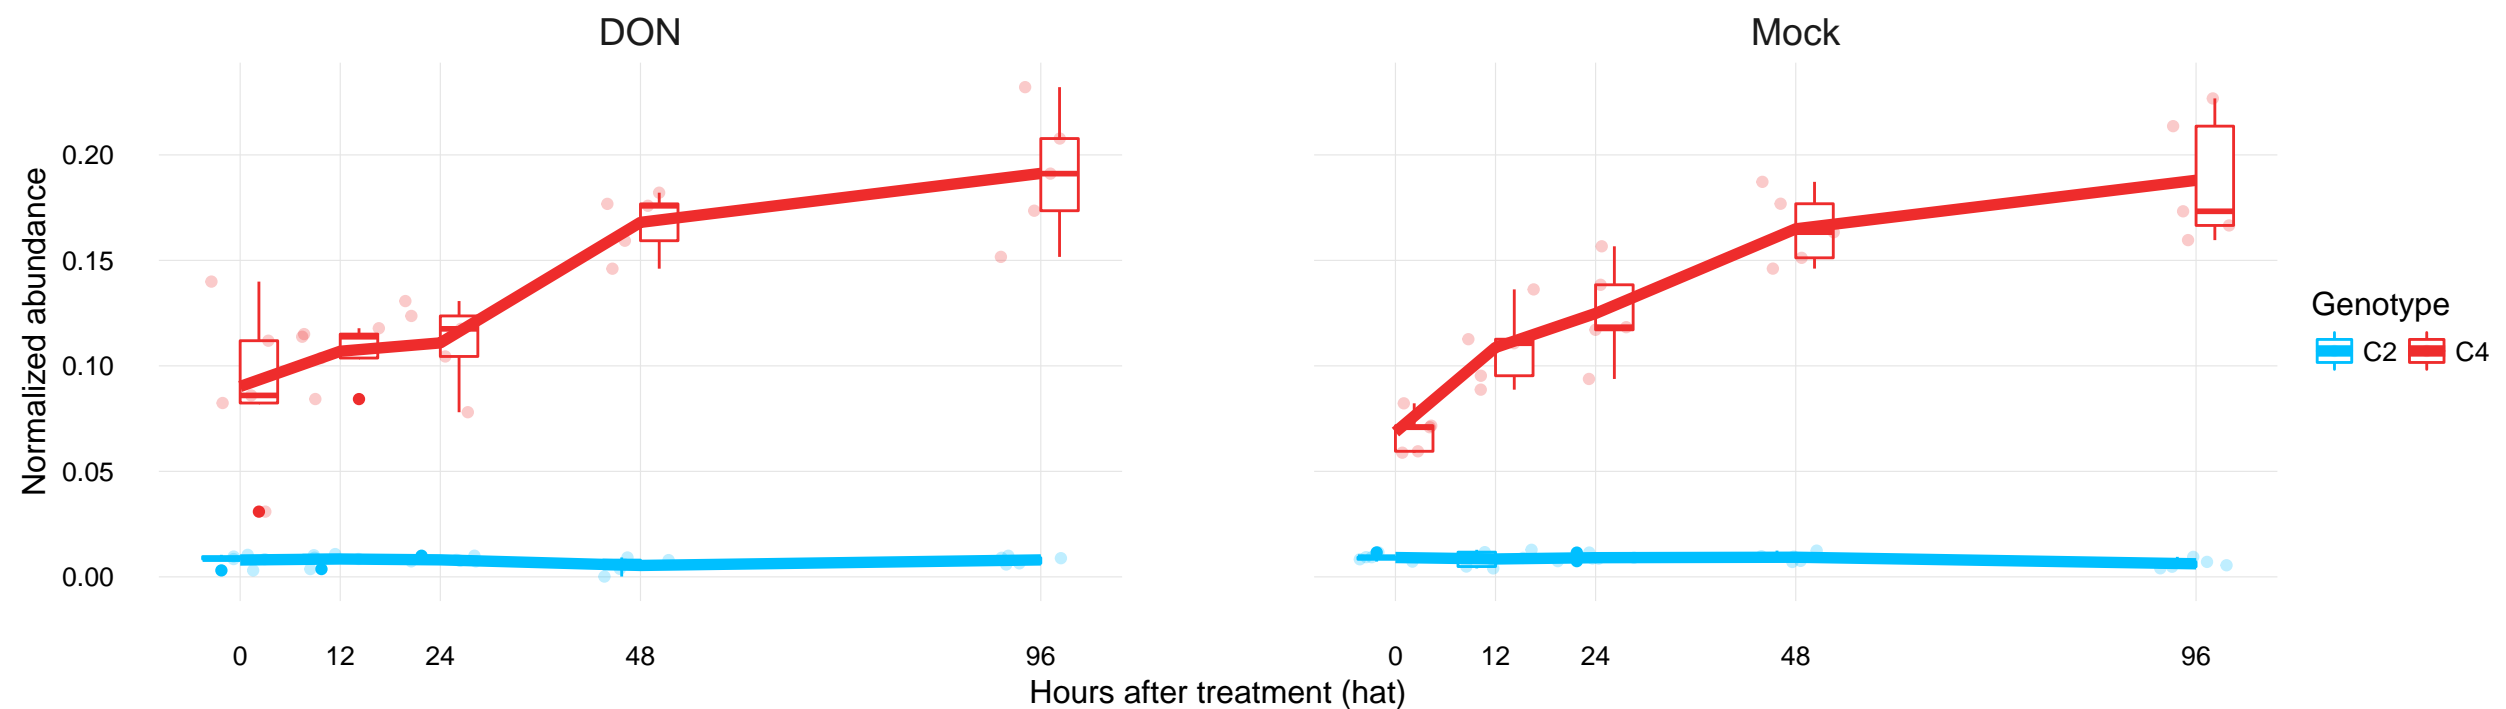

## CM, Remus; different treatments

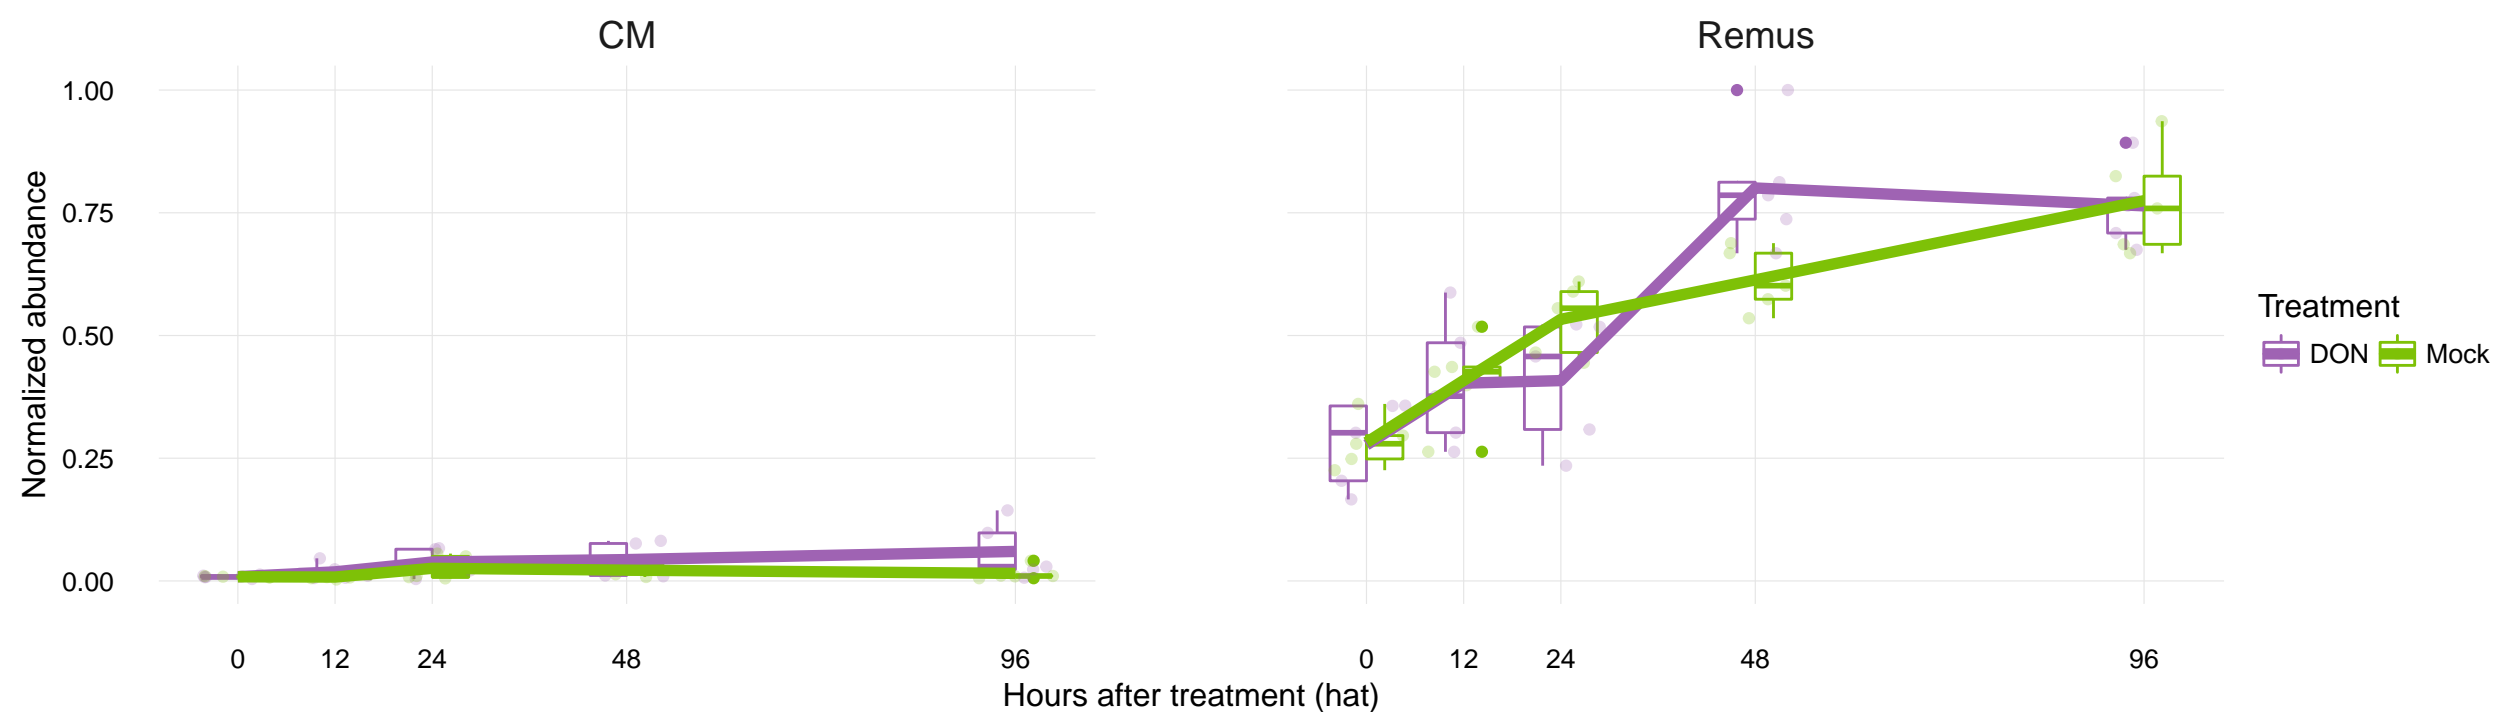

## DON, Mock; all four genotypes

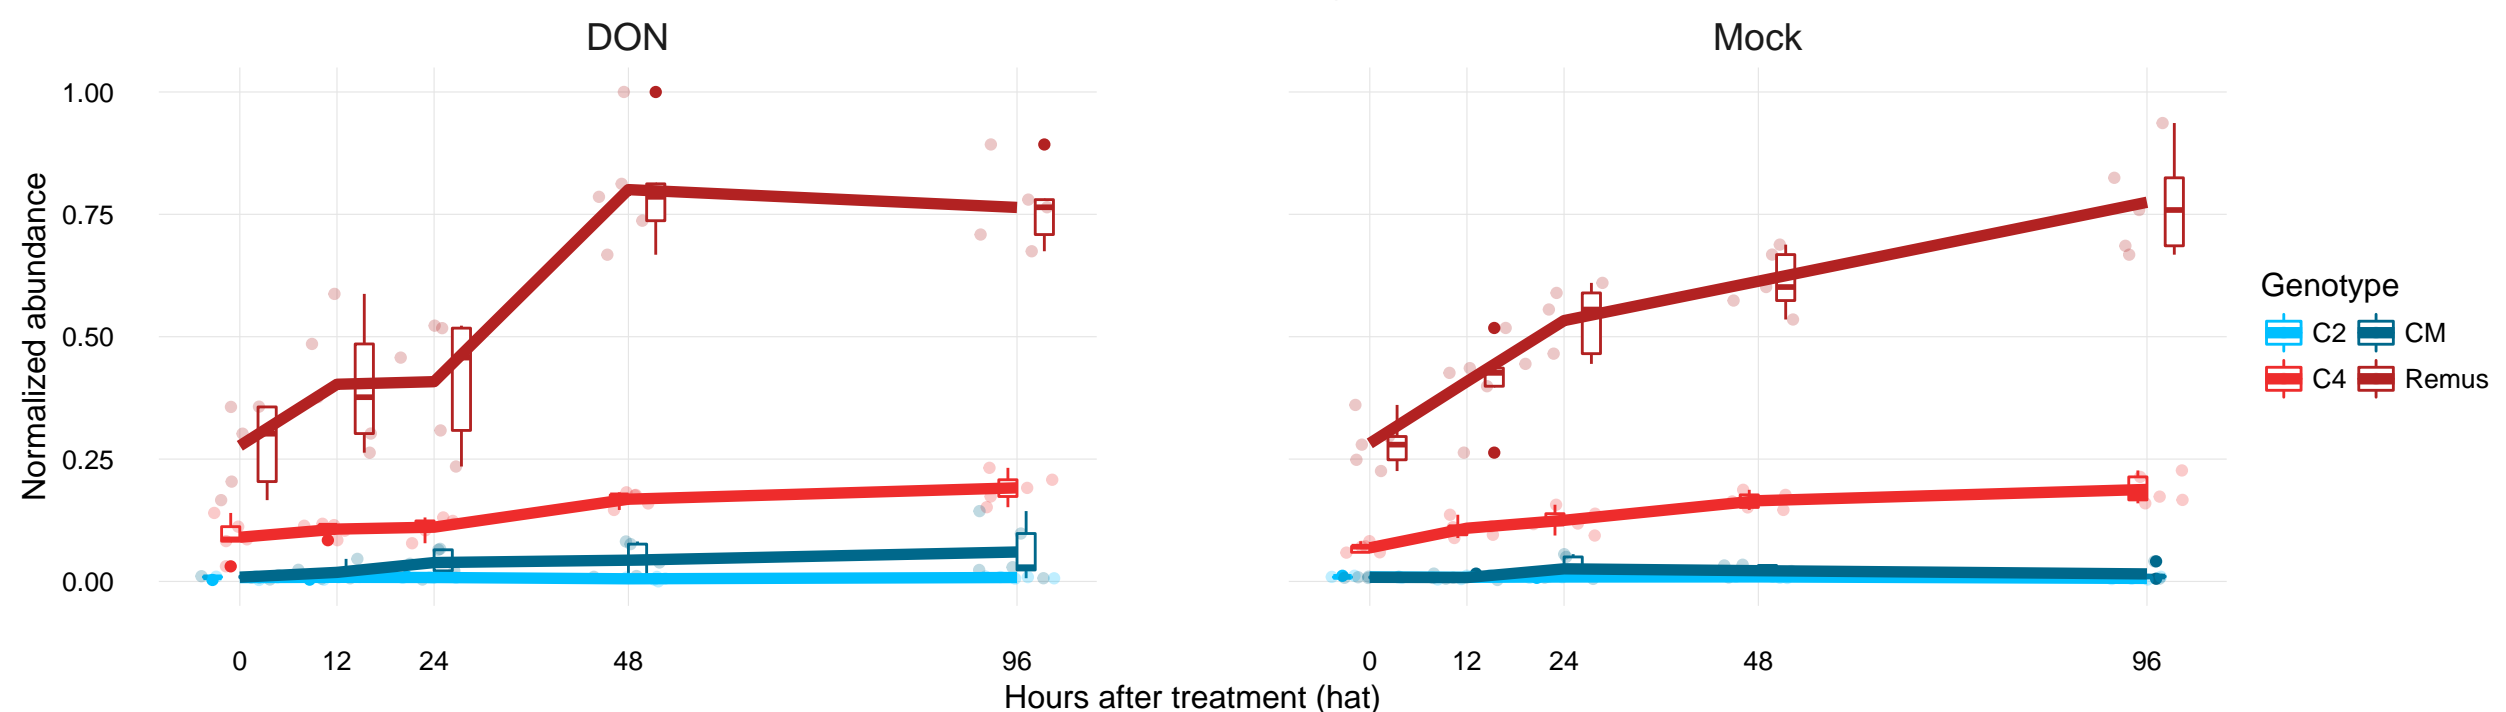

# A.56

Annotated as Putative benzoic acid derivative  
(14 database hits)

|                |                                                |
|----------------|------------------------------------------------|
| MZ             | 355.1025                                       |
| RT             | 12.75 min                                      |
| Normalization  | Indirectly via surrogate<br>in the KPX samples |
| Cluster        | Cluster 4                                      |
| Cn total / Phe | 16 / 7                                         |

## C2, C4; different treatments

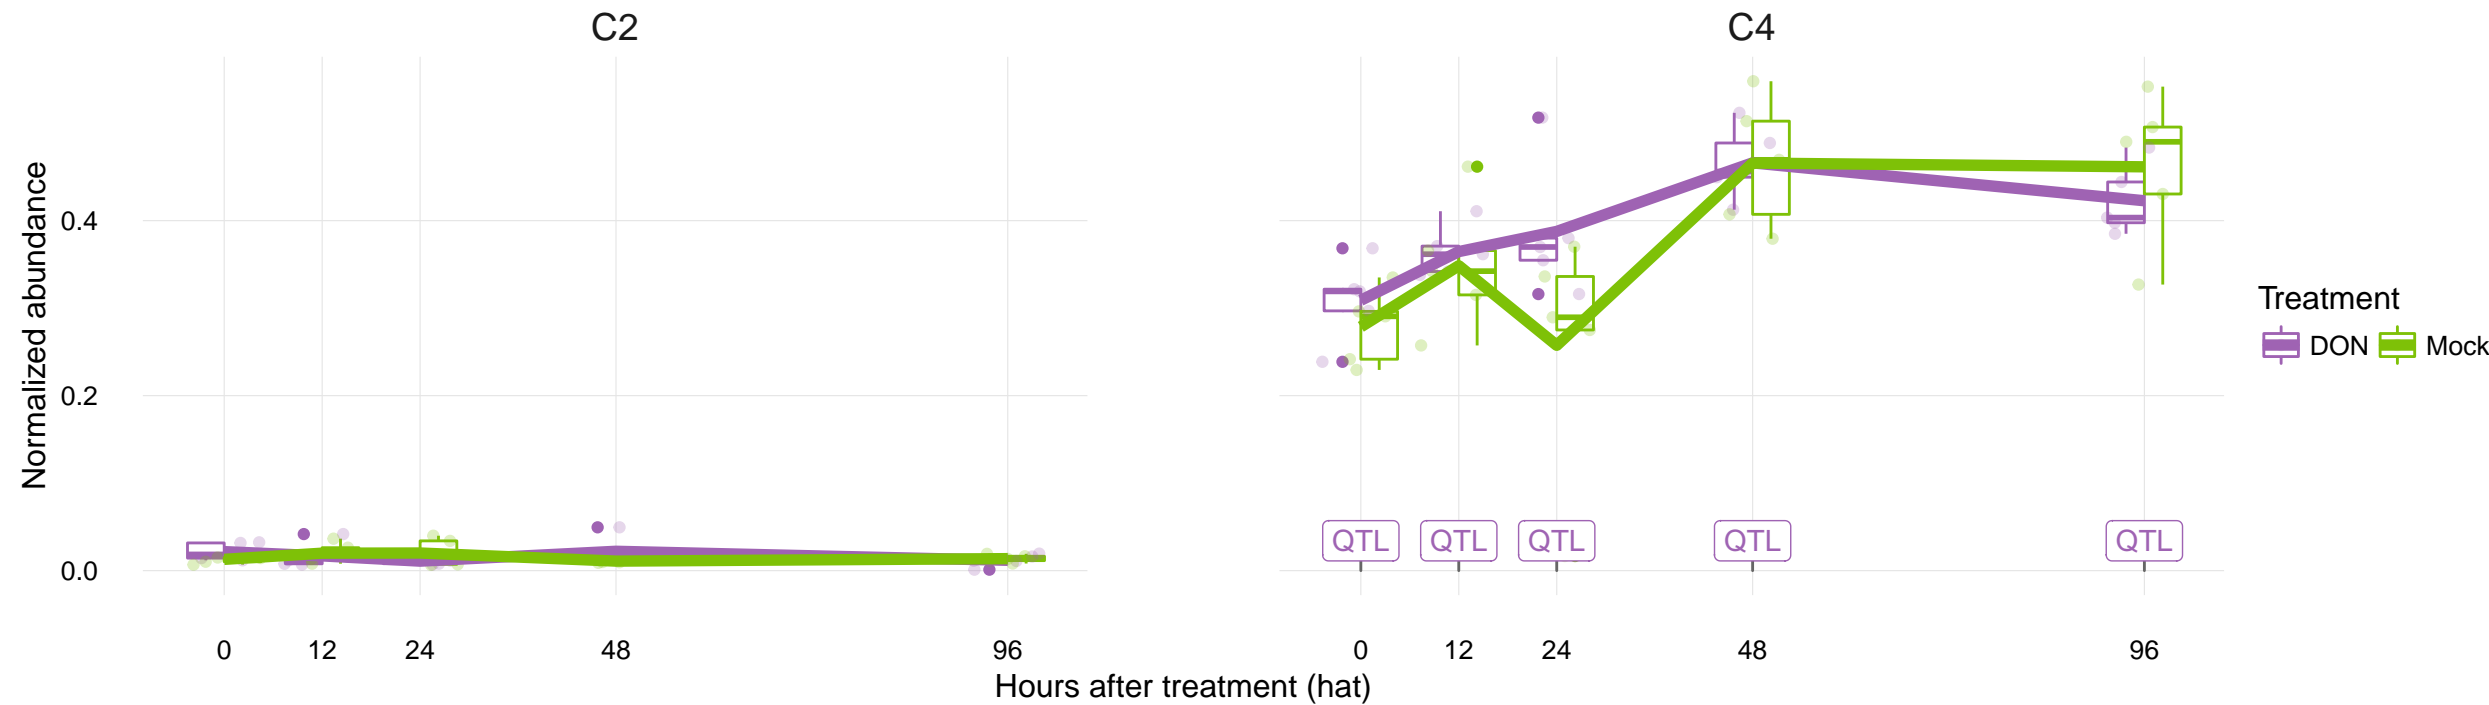

## DON, Mock; different genotypes

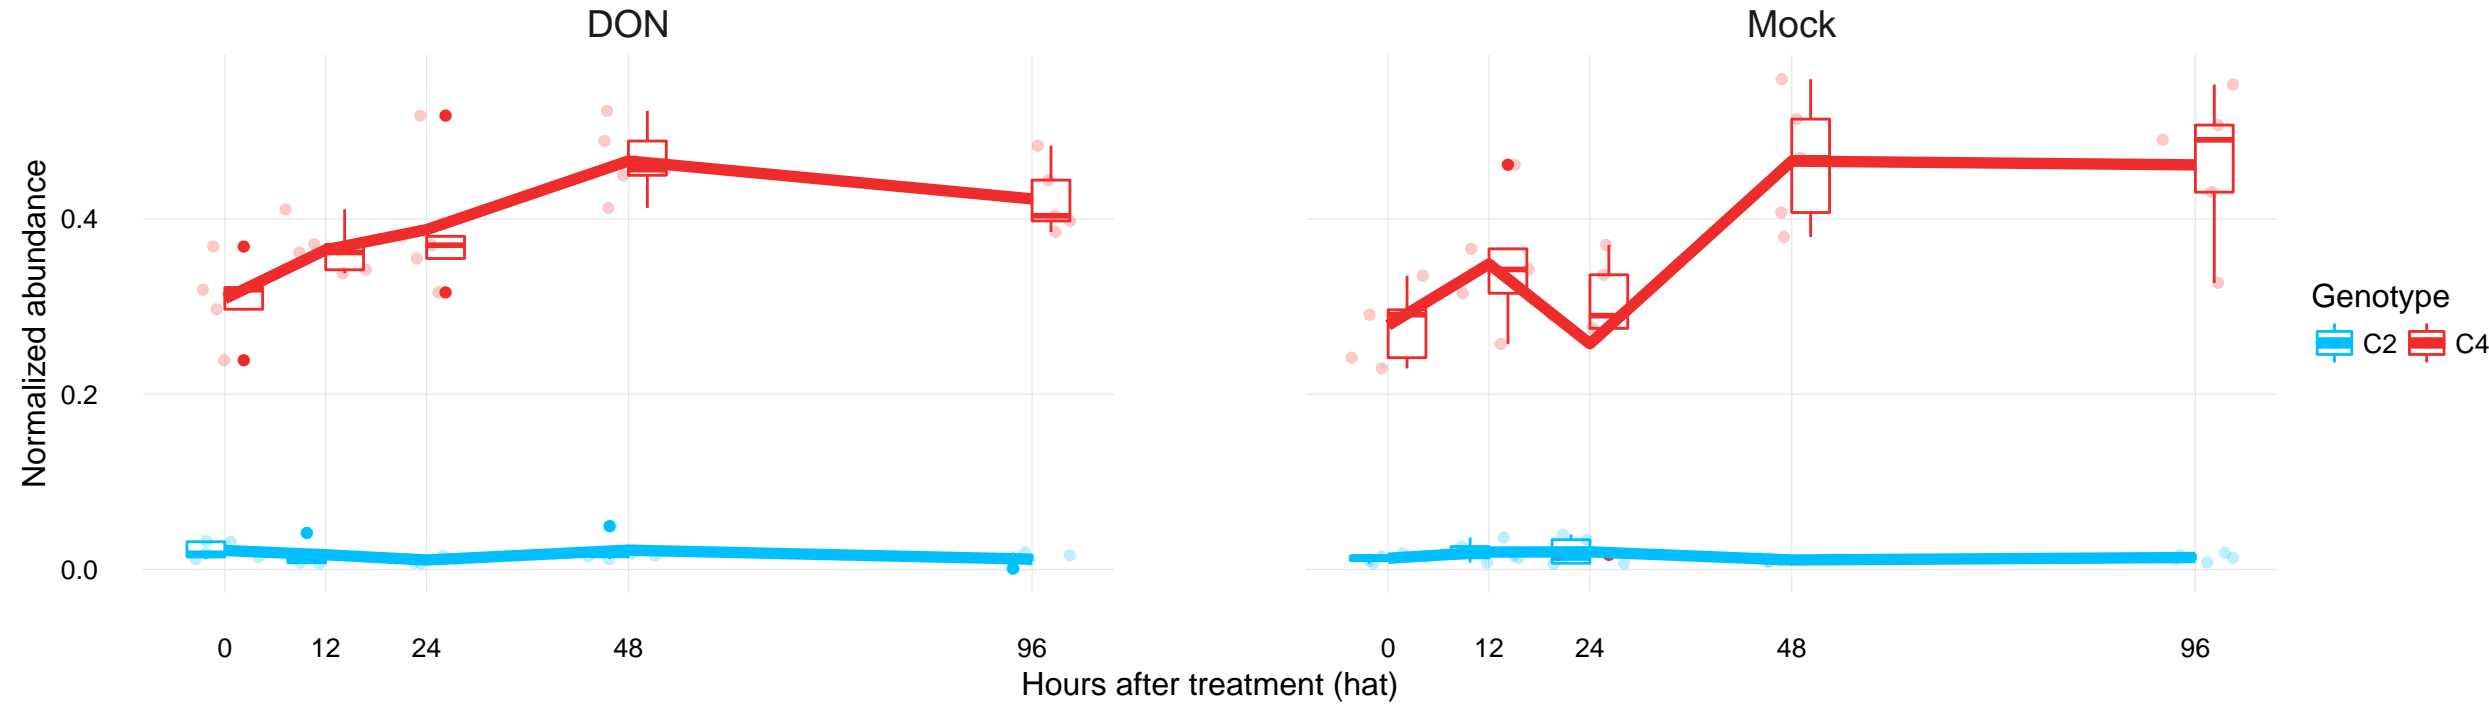

## CM, Remus; different treatments

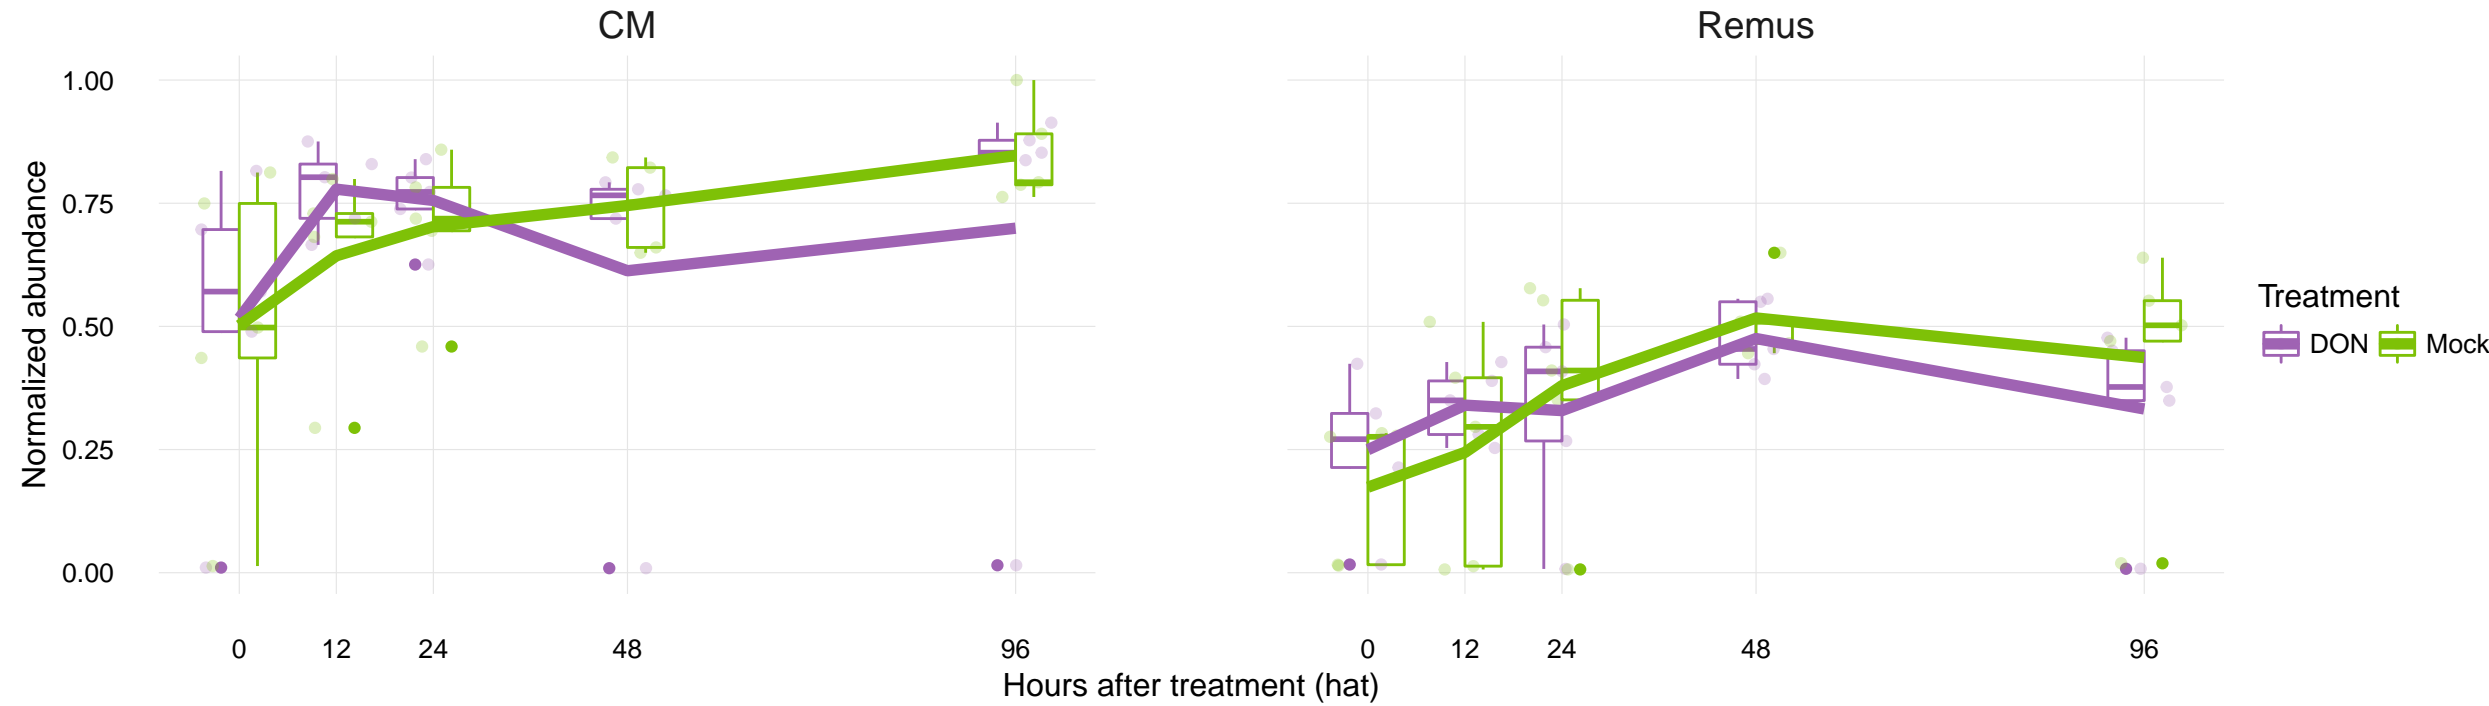

## DON, Mock; all four genotypes

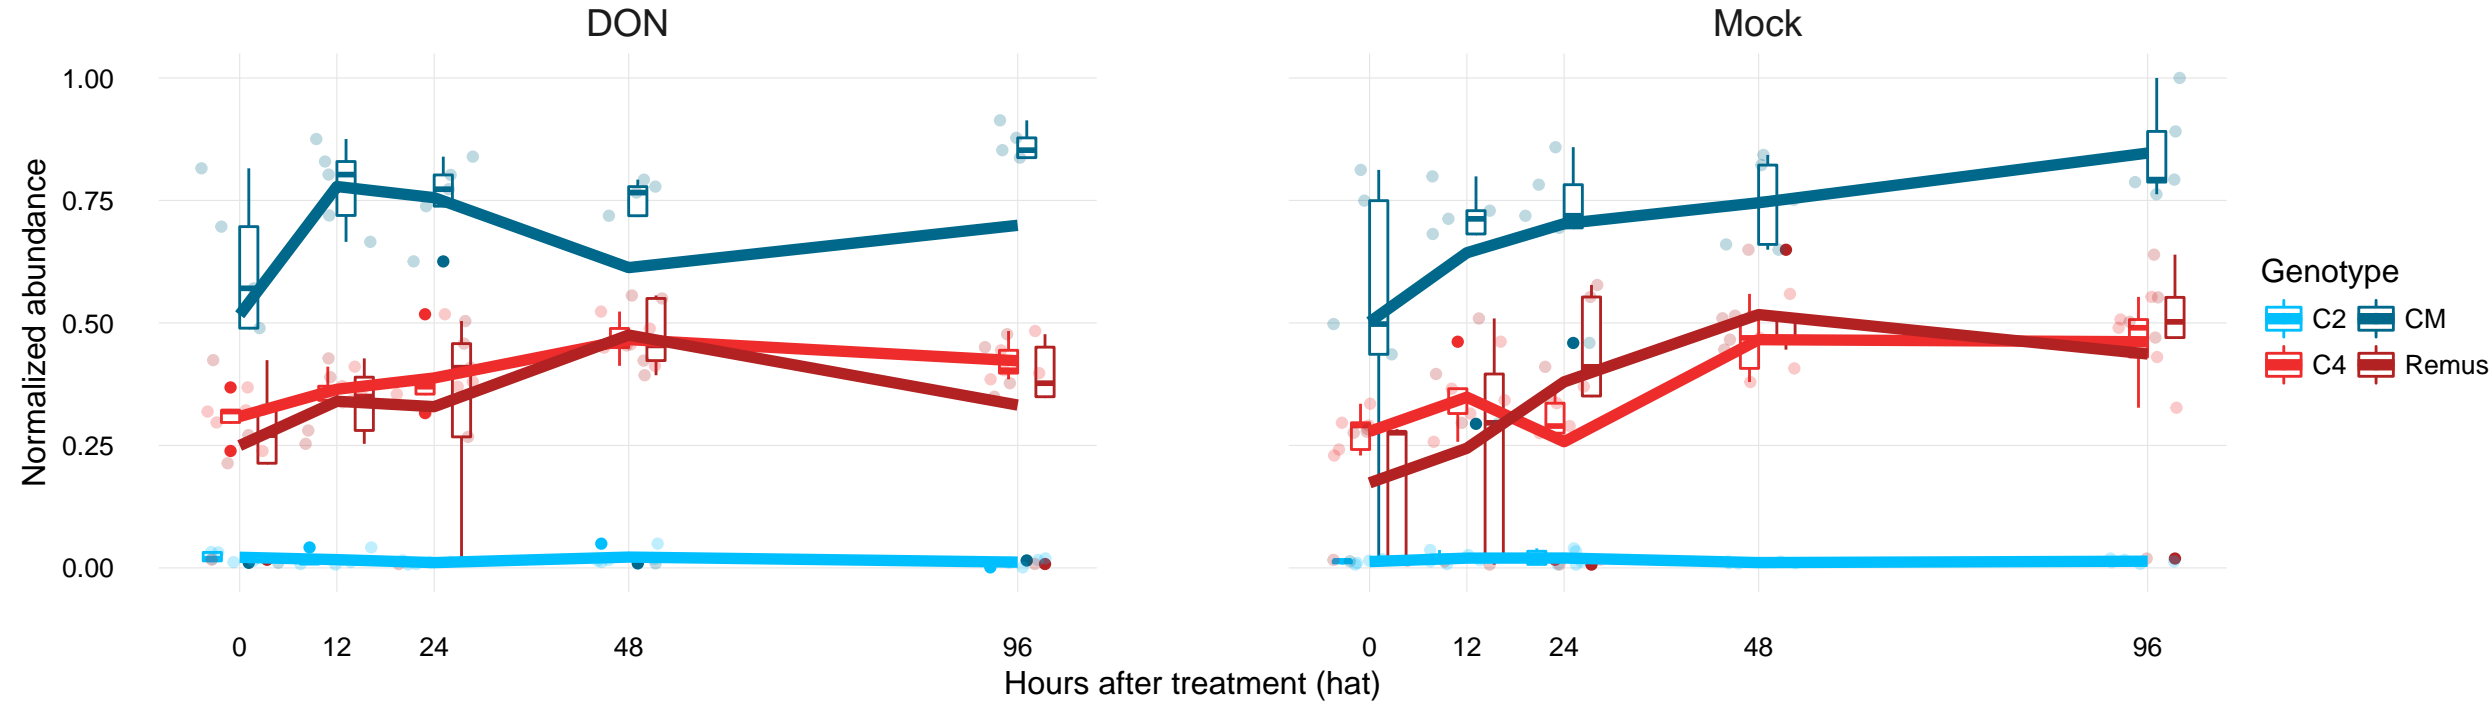

A.82

Annotated as others (Iridoid)  
(1 database hit)

|                |                                                |
|----------------|------------------------------------------------|
| MZ             | 584.234                                        |
| RT             | 14.65 min                                      |
| Normalization  | Indirectly via surrogate<br>in the KPX samples |
| Cluster        | Cluster 4                                      |
| Cn total / Phe | 27 / 9                                         |

C2, C4; different treatments

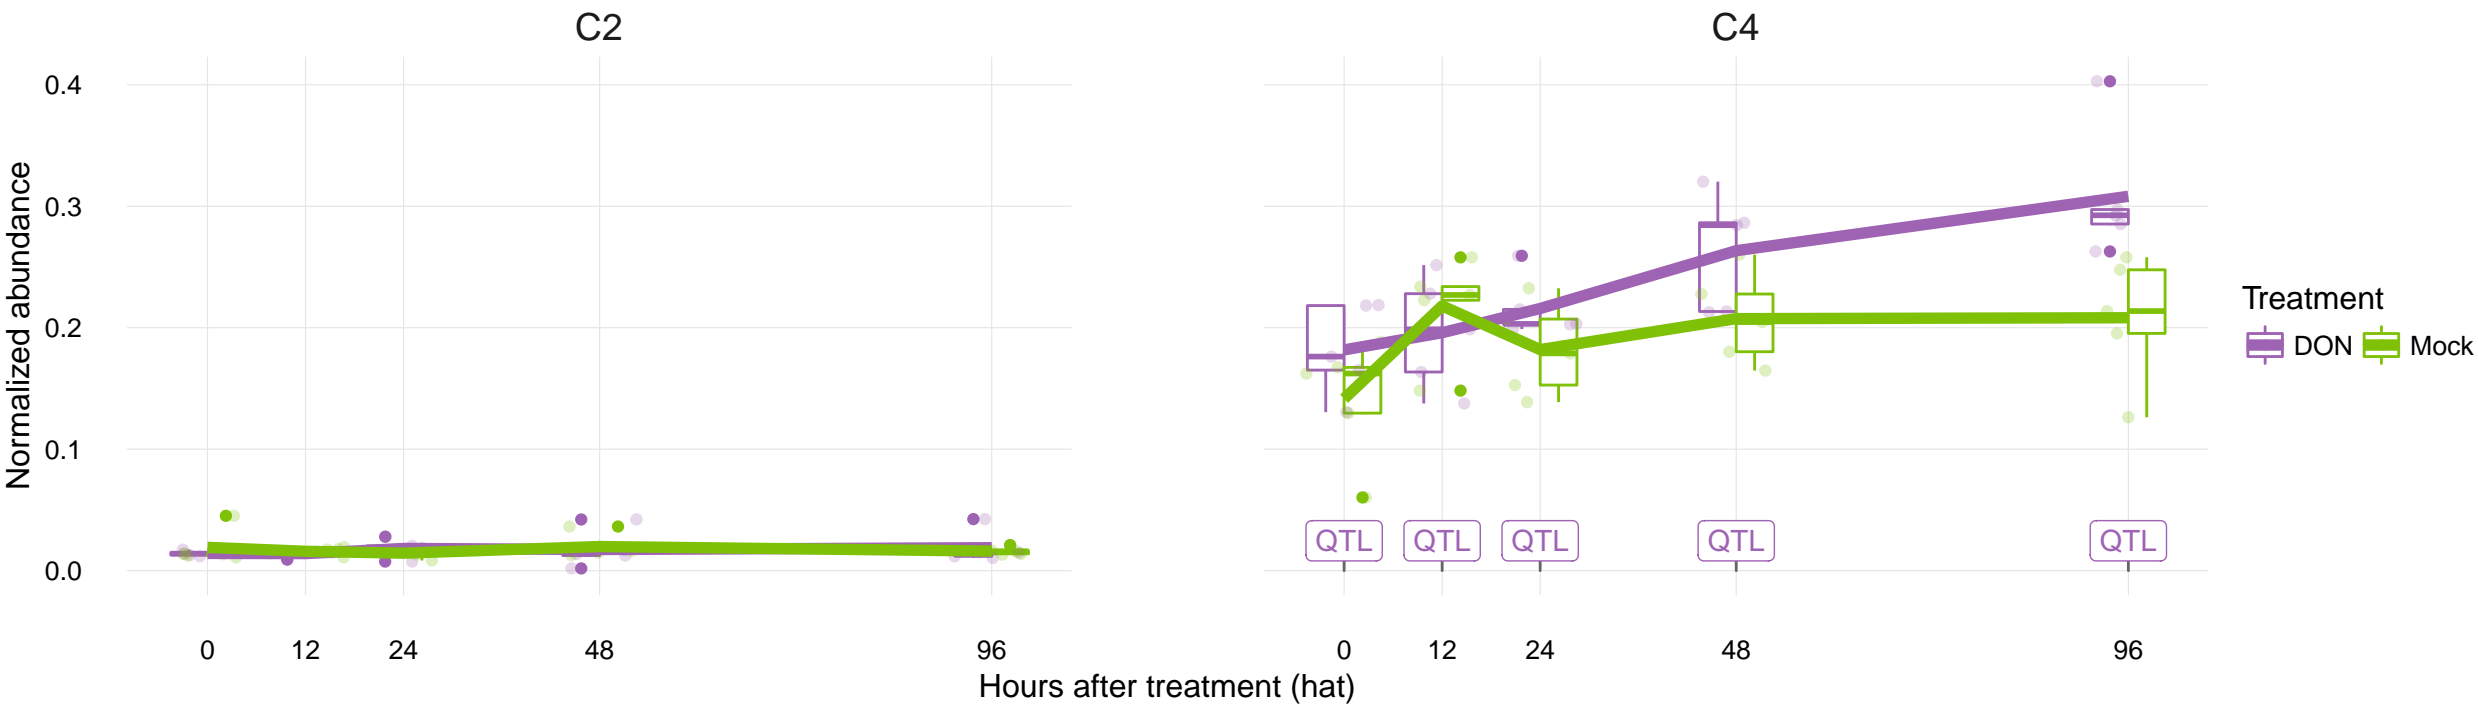

DON, Mock; different genotypes

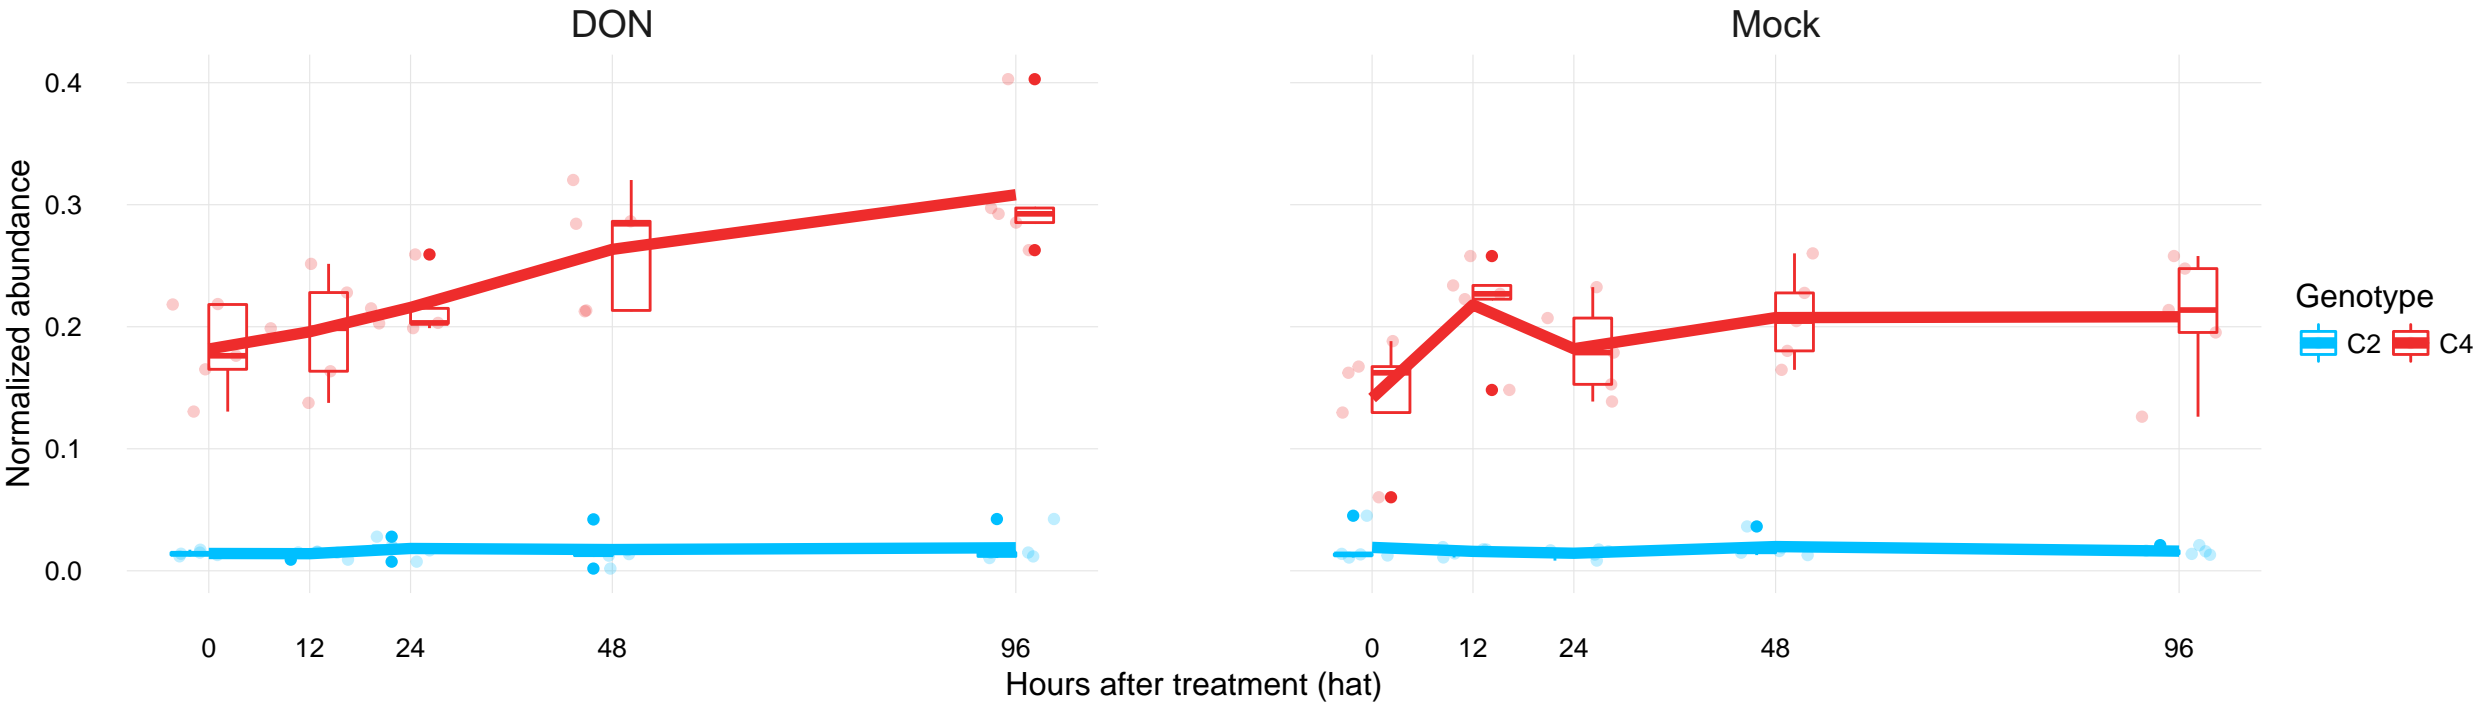

CM, Remus; different treatments

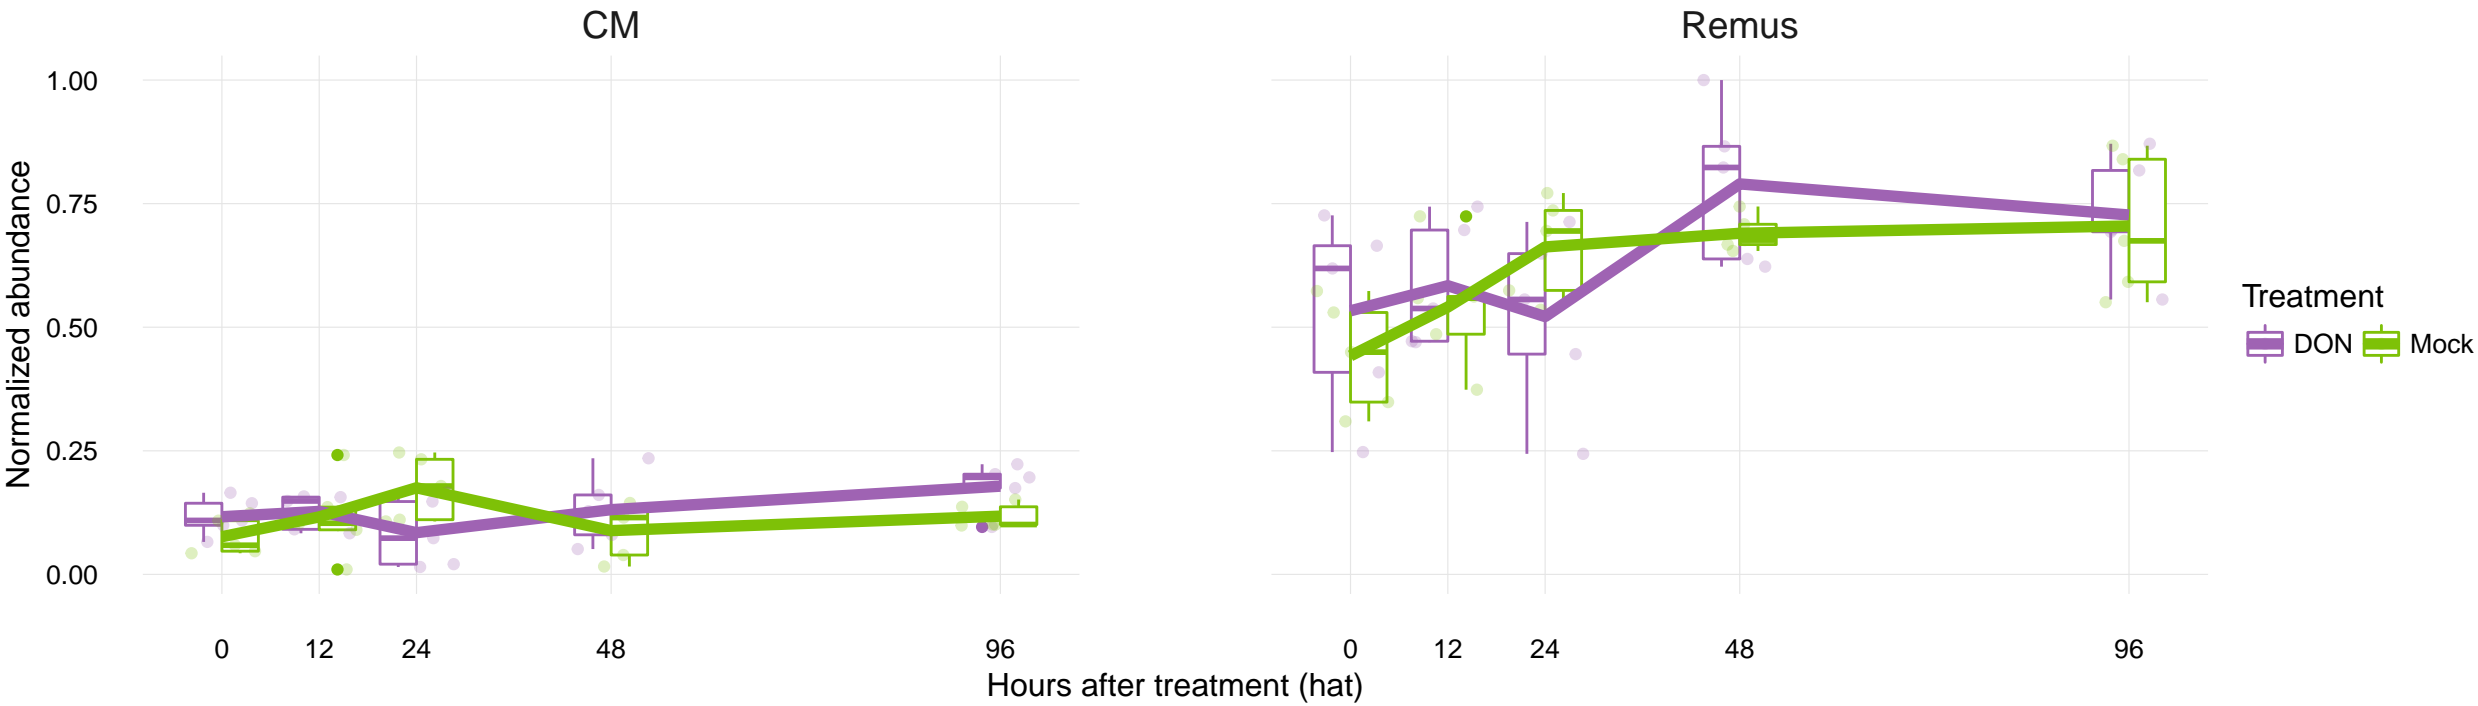

DON, Mock; all four genotypes

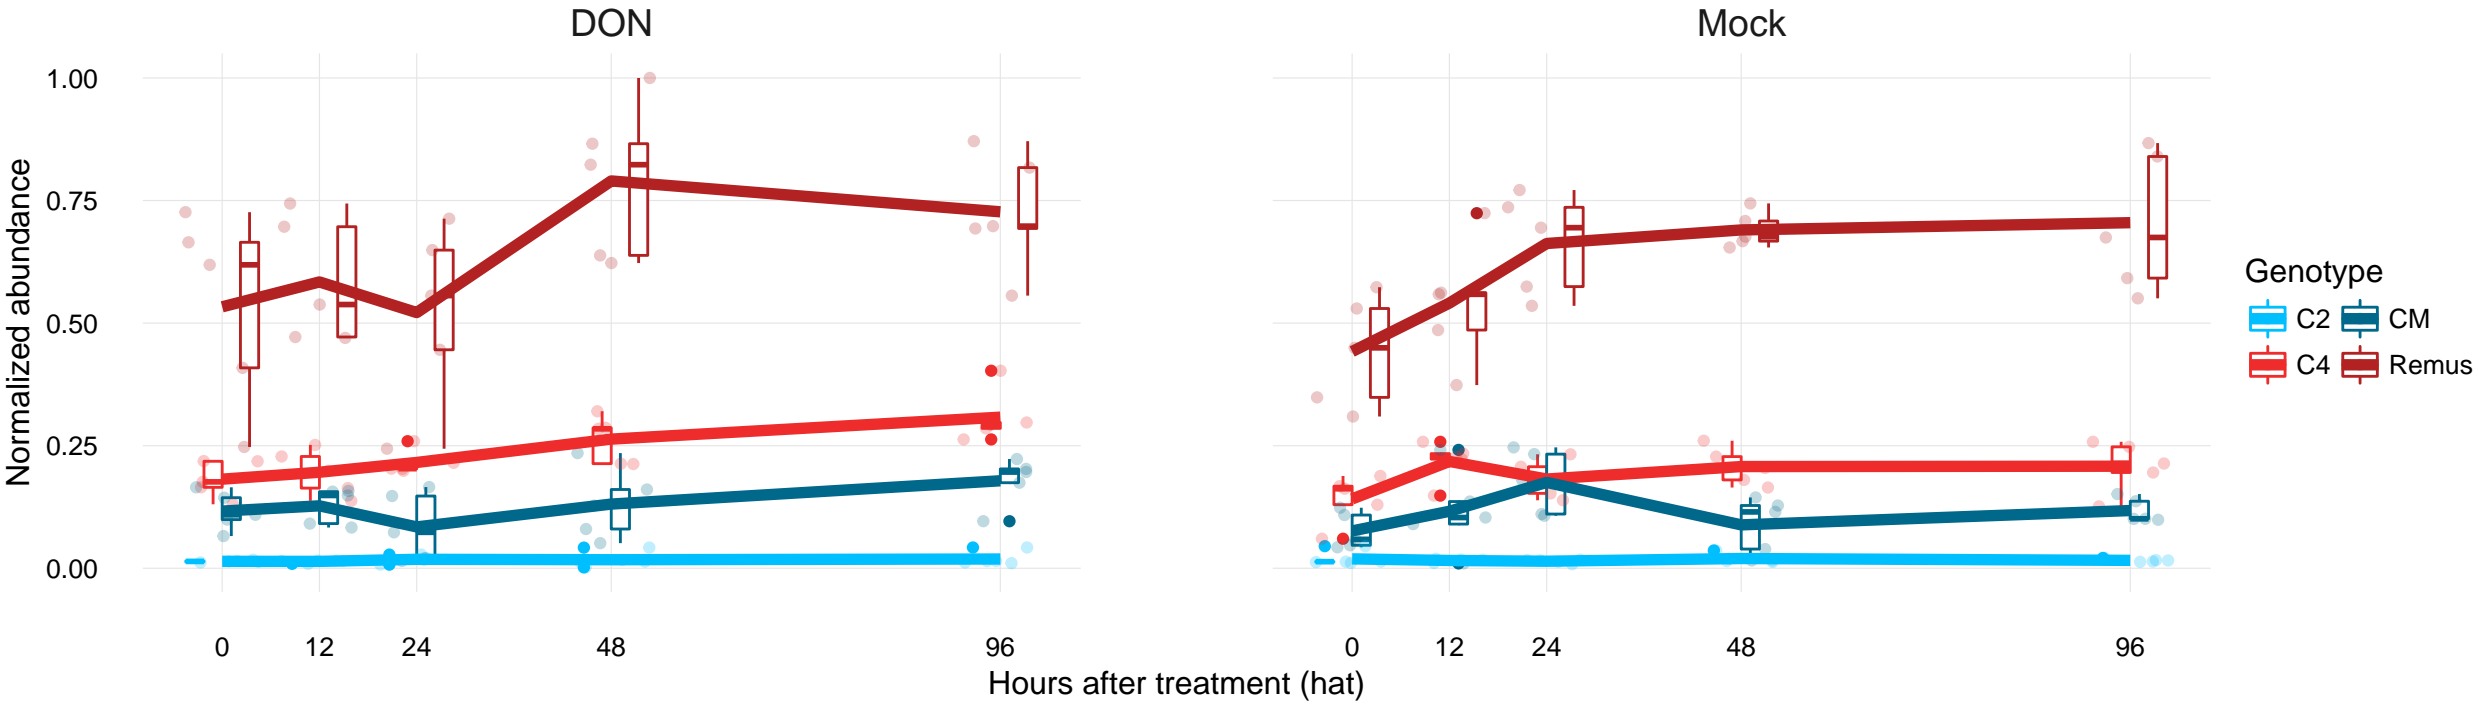

# A.138

Annotated as HCA derivative  
(1 database hit)

|                |                          |
|----------------|--------------------------|
| MZ             | 495.1285                 |
| RT             | 24.08 min                |
| Normalization  | Directly via KPX samples |
| Cluster        | Cluster 4                |
| Cn total / Phe | 26 /                     |

## C2, C4; different treatments

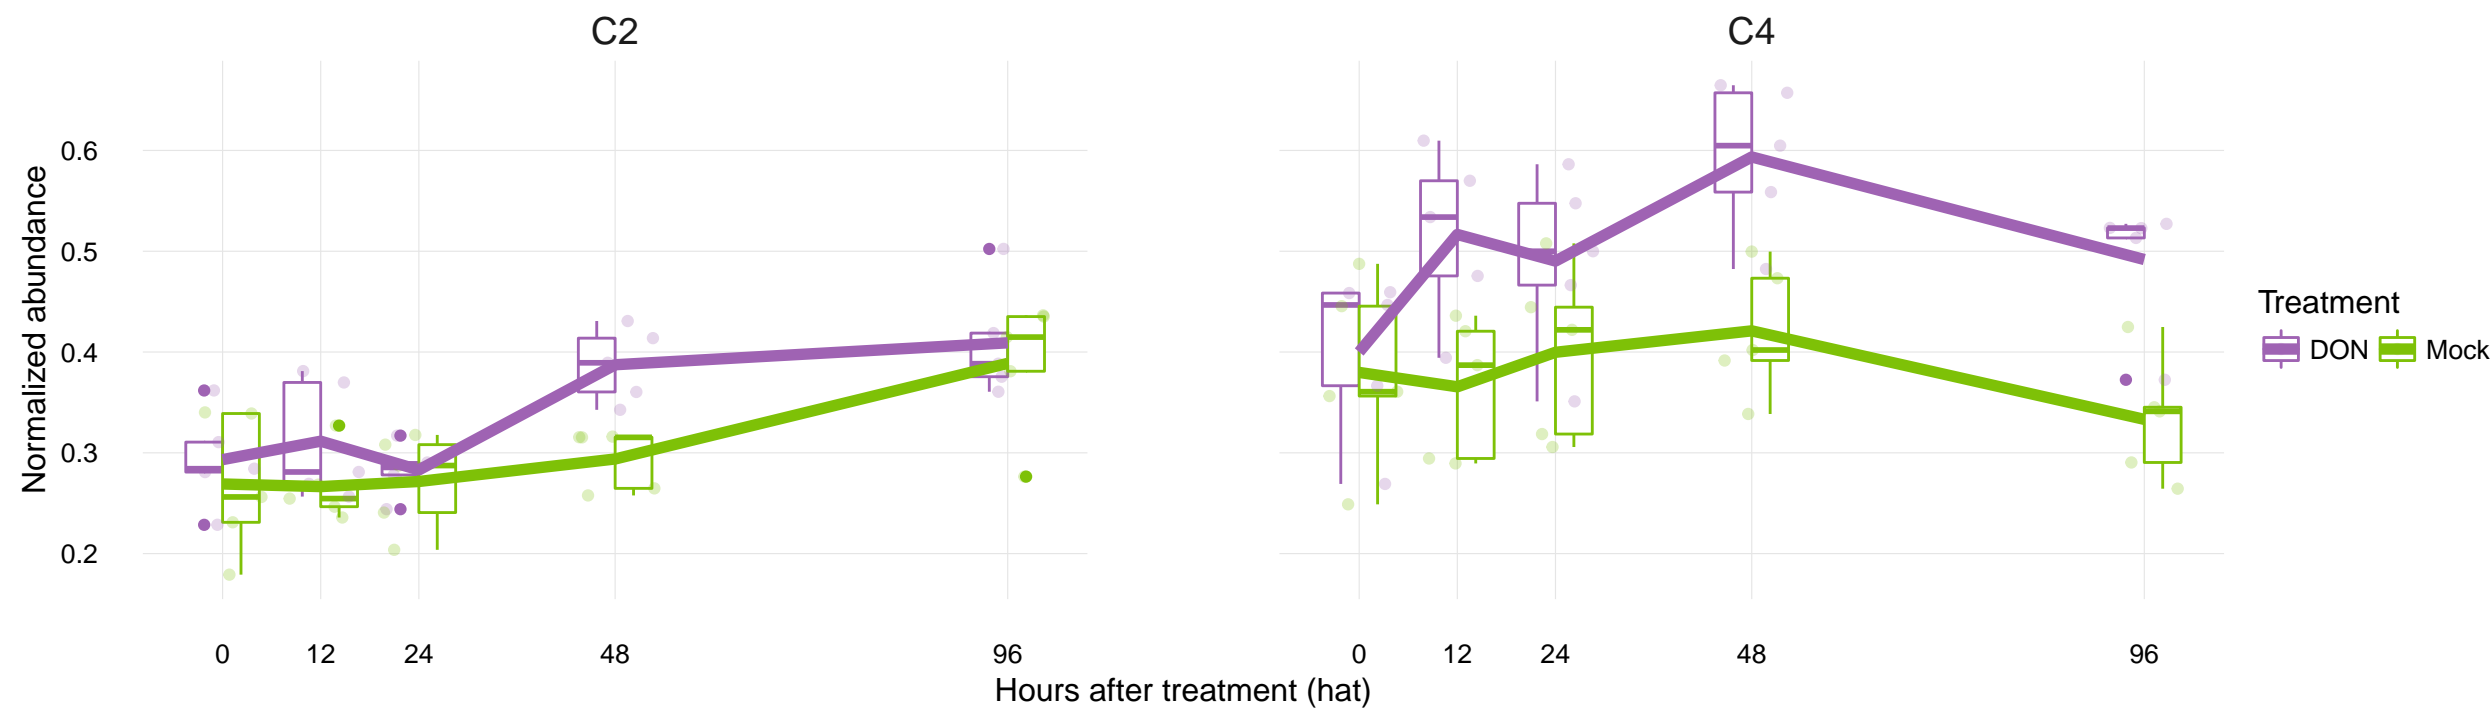

## DON, Mock; different genotypes

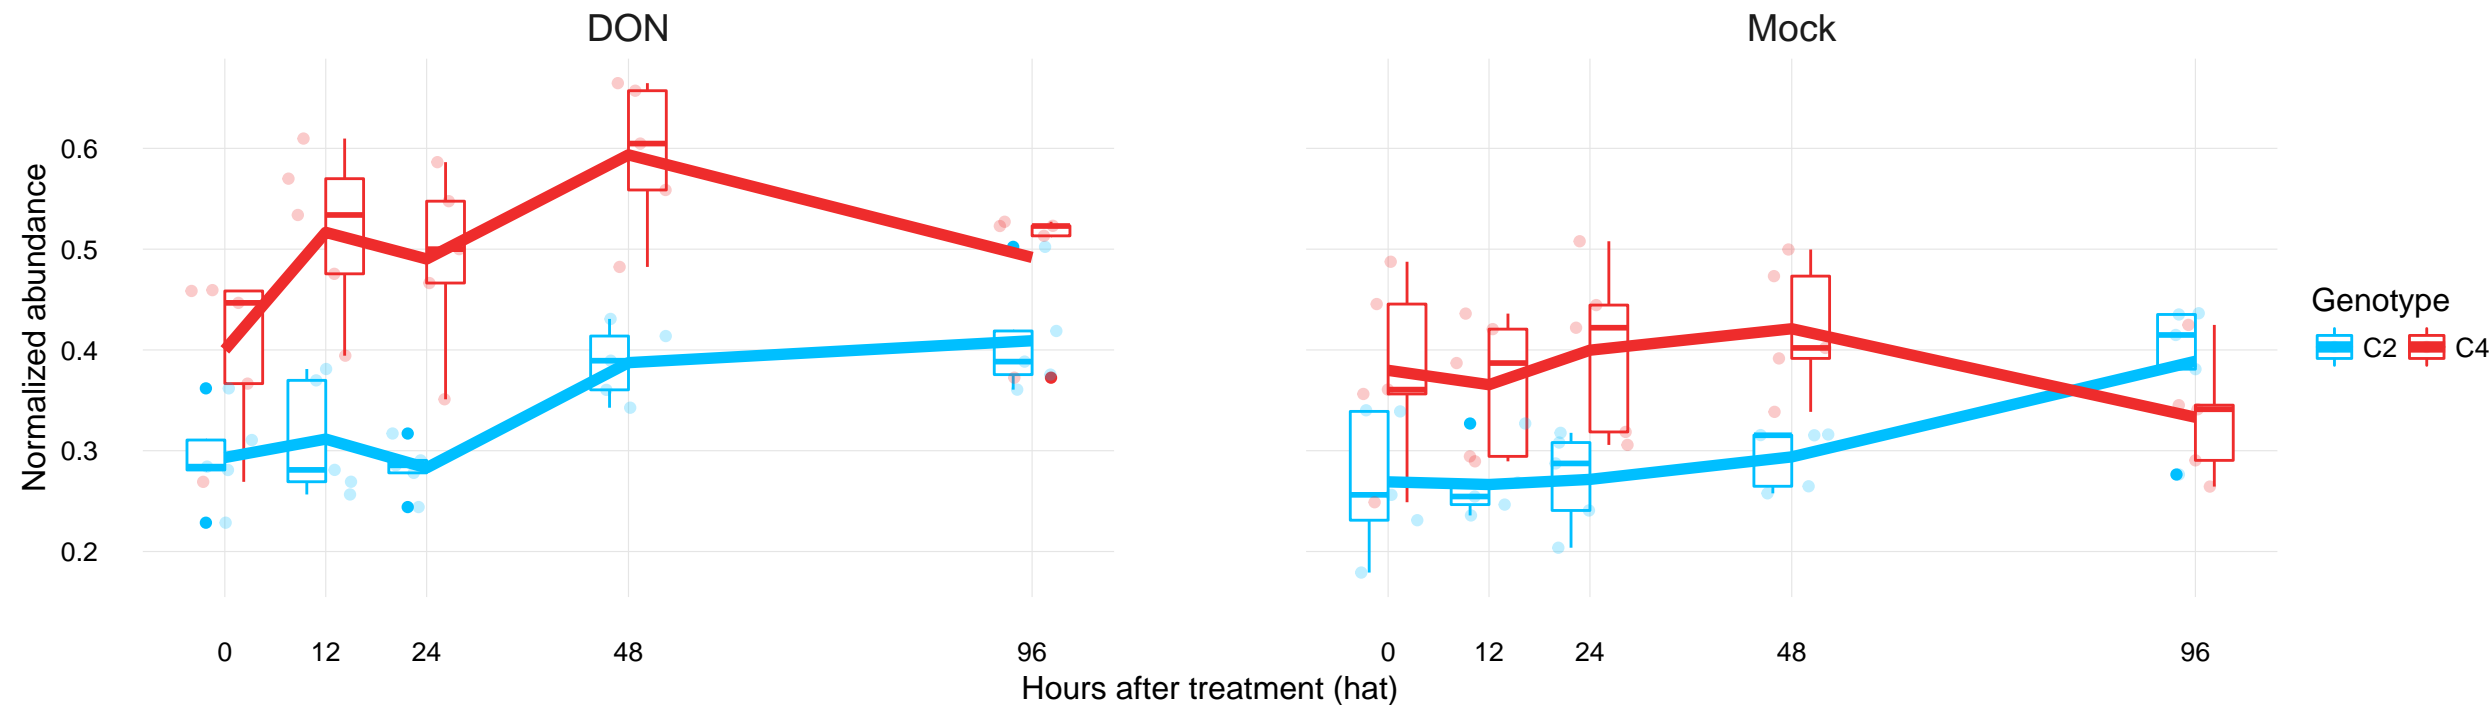

## CM, Remus; different treatments

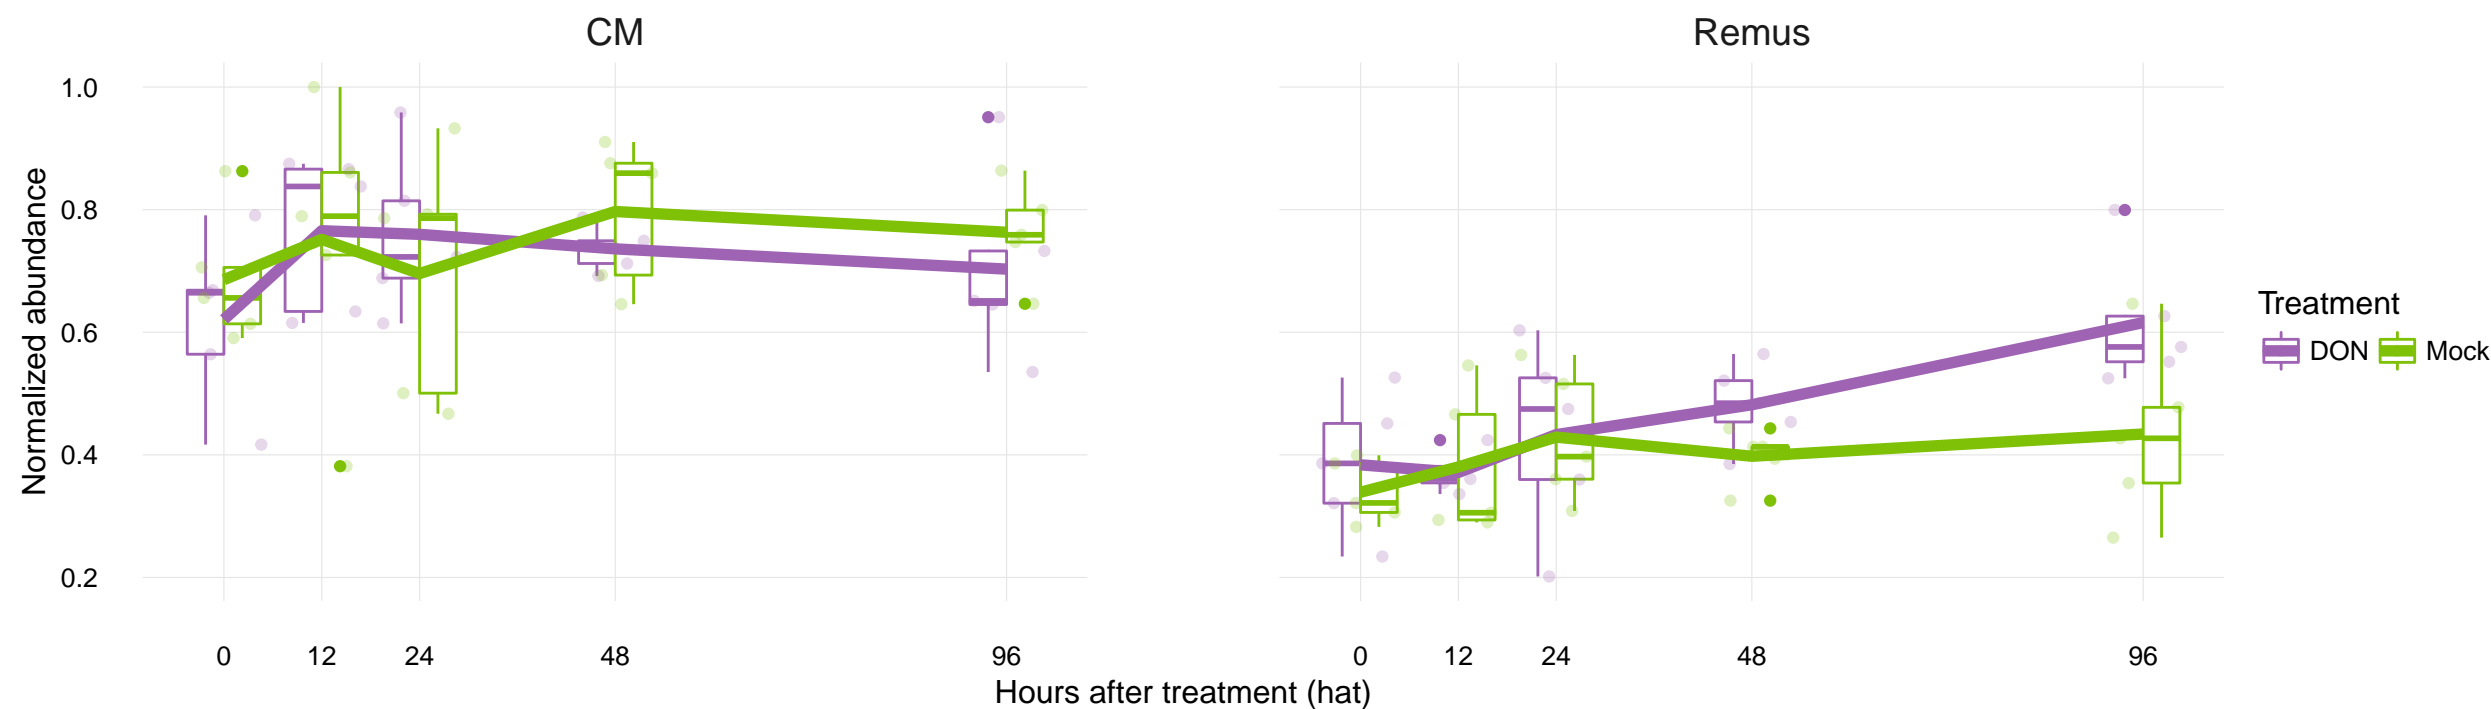

## DON, Mock; all four genotypes

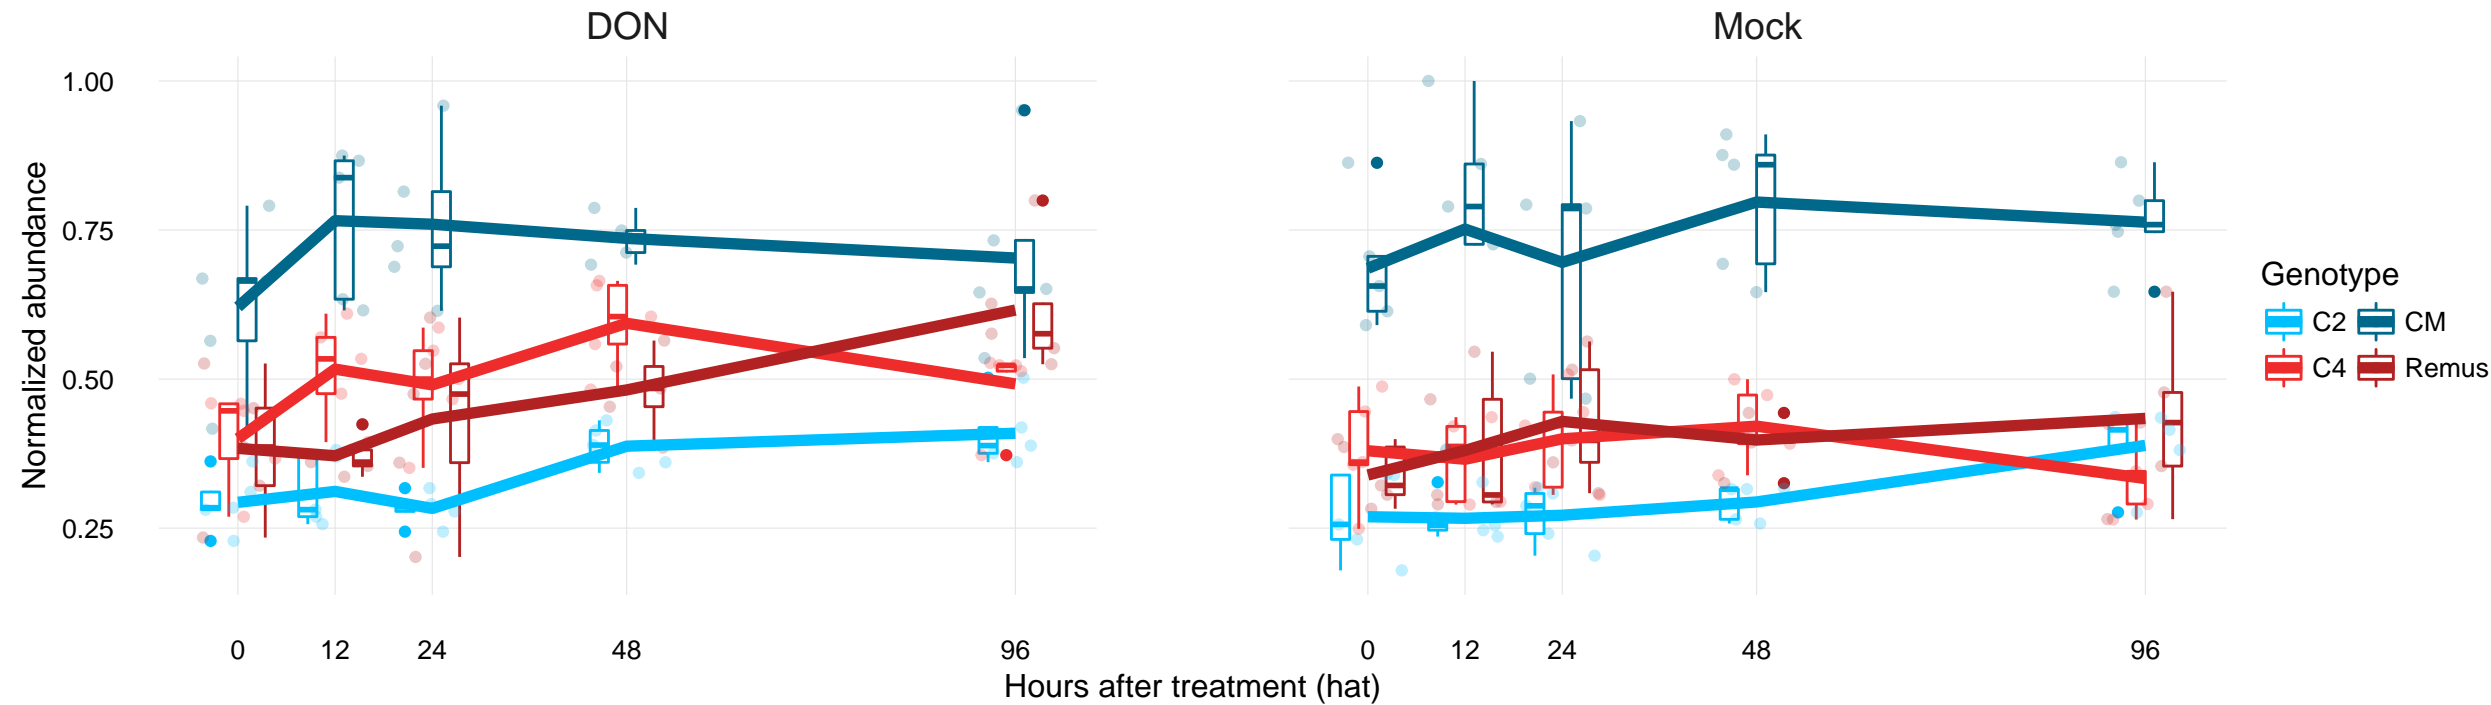



# A.42

Annotated as HCA derivative  
(1 database hit)

|                |                          |
|----------------|--------------------------|
| MZ             | 415.1239                 |
| RT             | 10.87 min                |
| Normalization  | Directly via KPX samples |
| Cluster        | Cluster 4                |
| Cn total / Phe | 18 / 9                   |

## C2, C4; different treatments

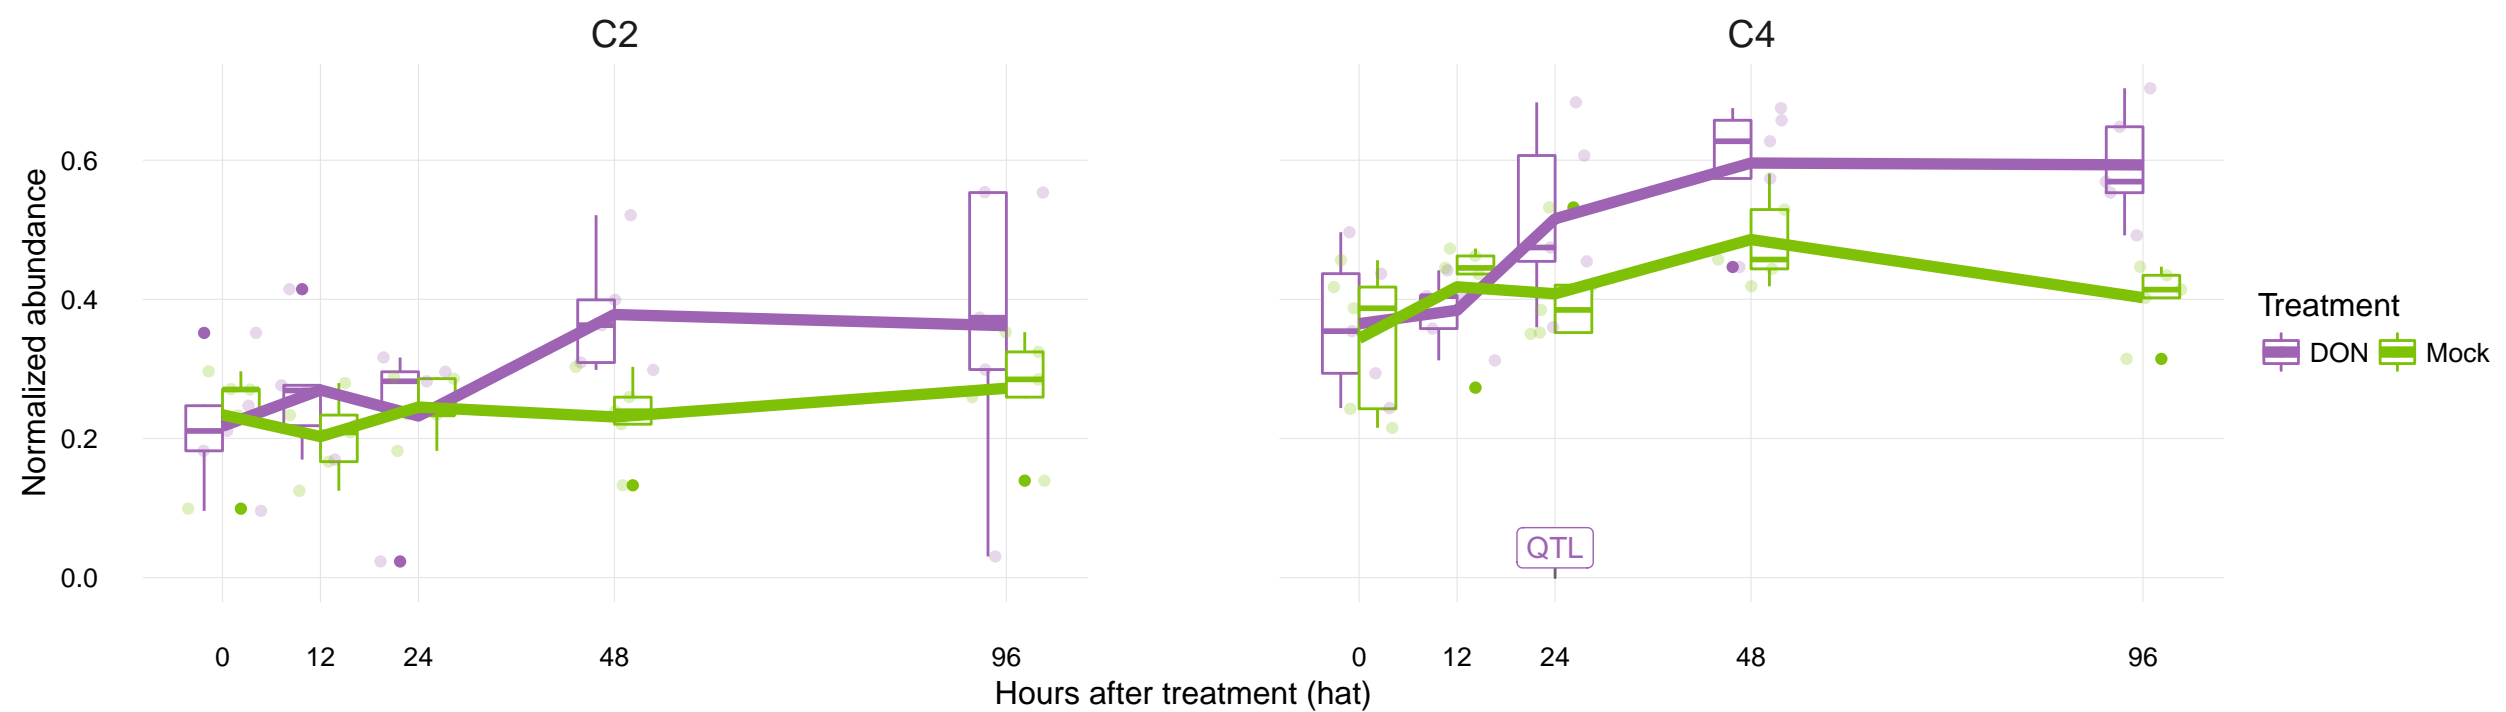

## DON, Mock; different genotypes

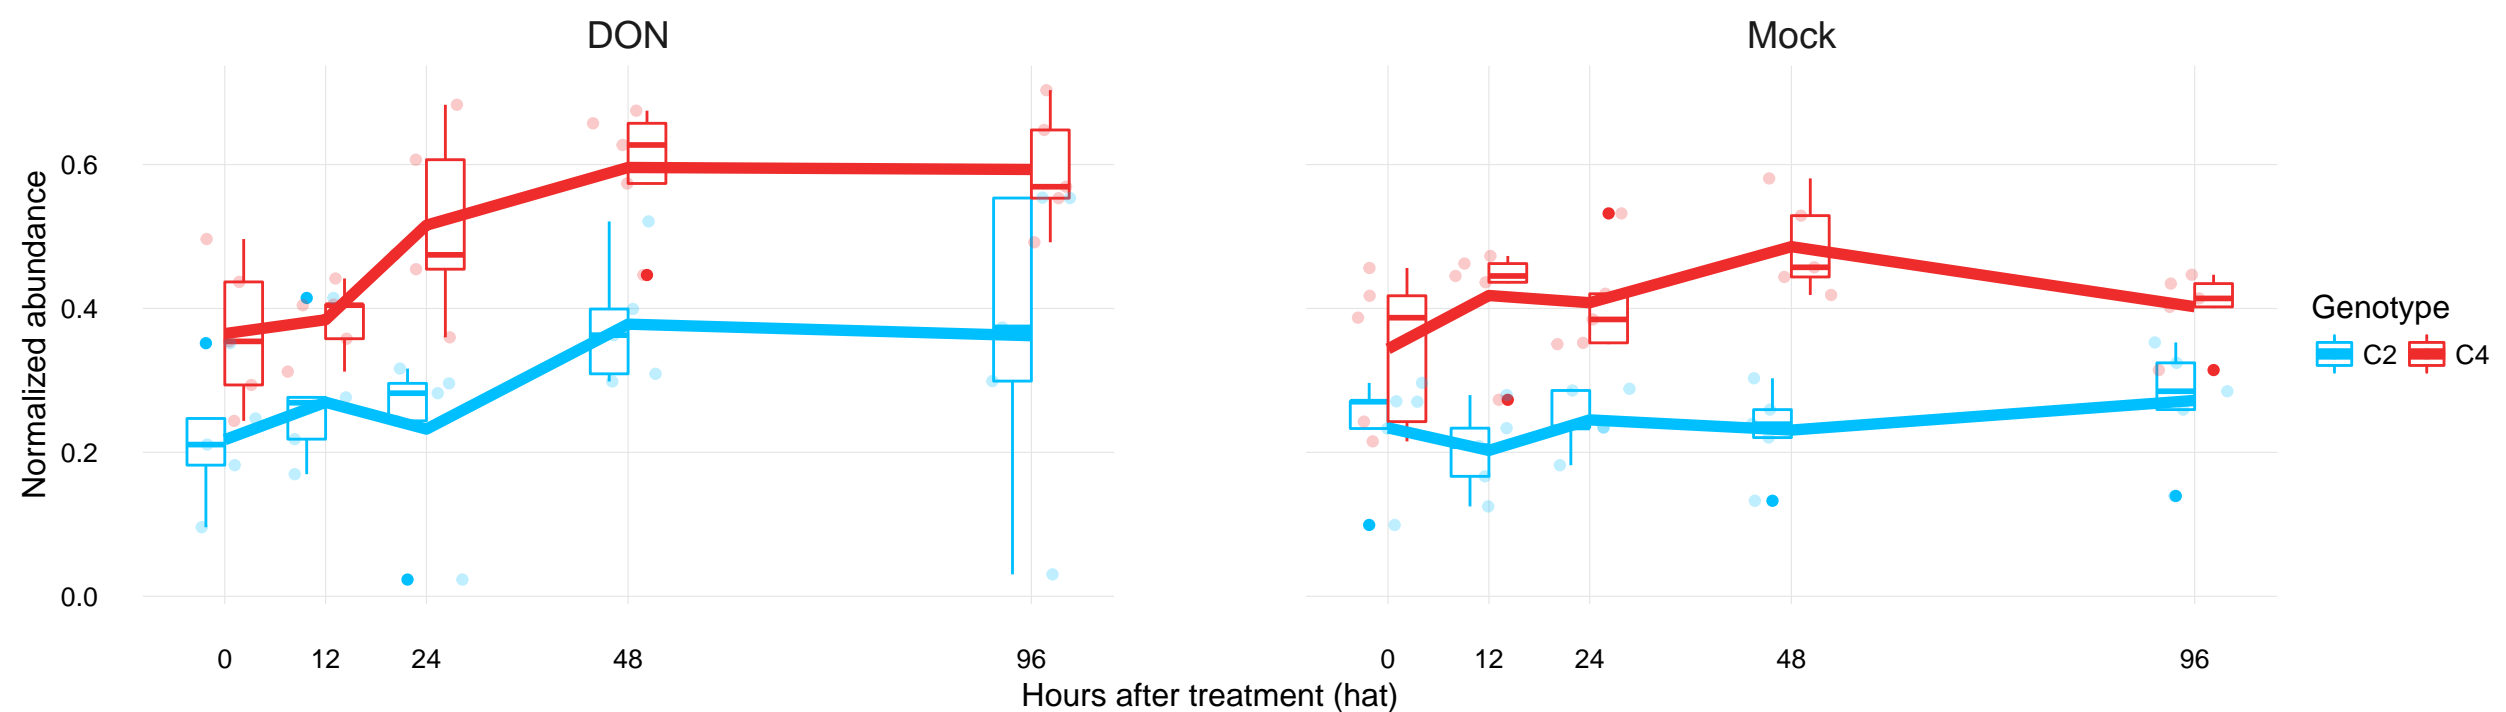

## CM, Remus; different treatments

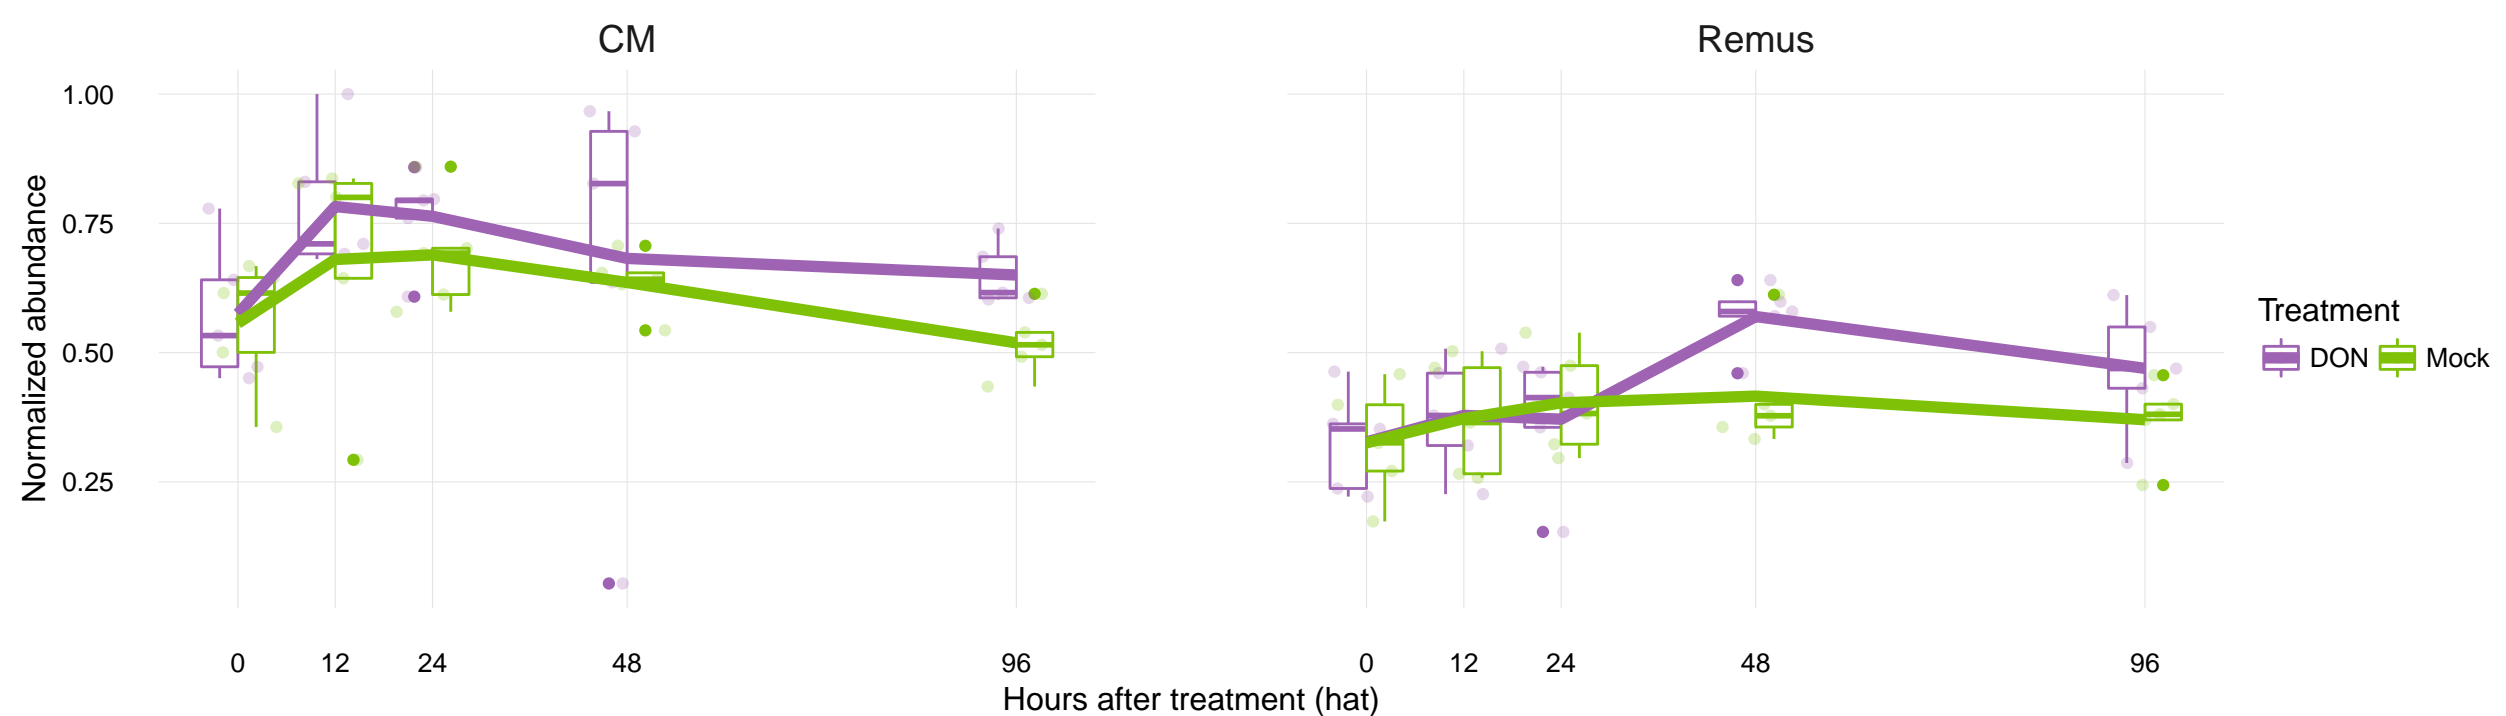

## DON, Mock; all four genotypes

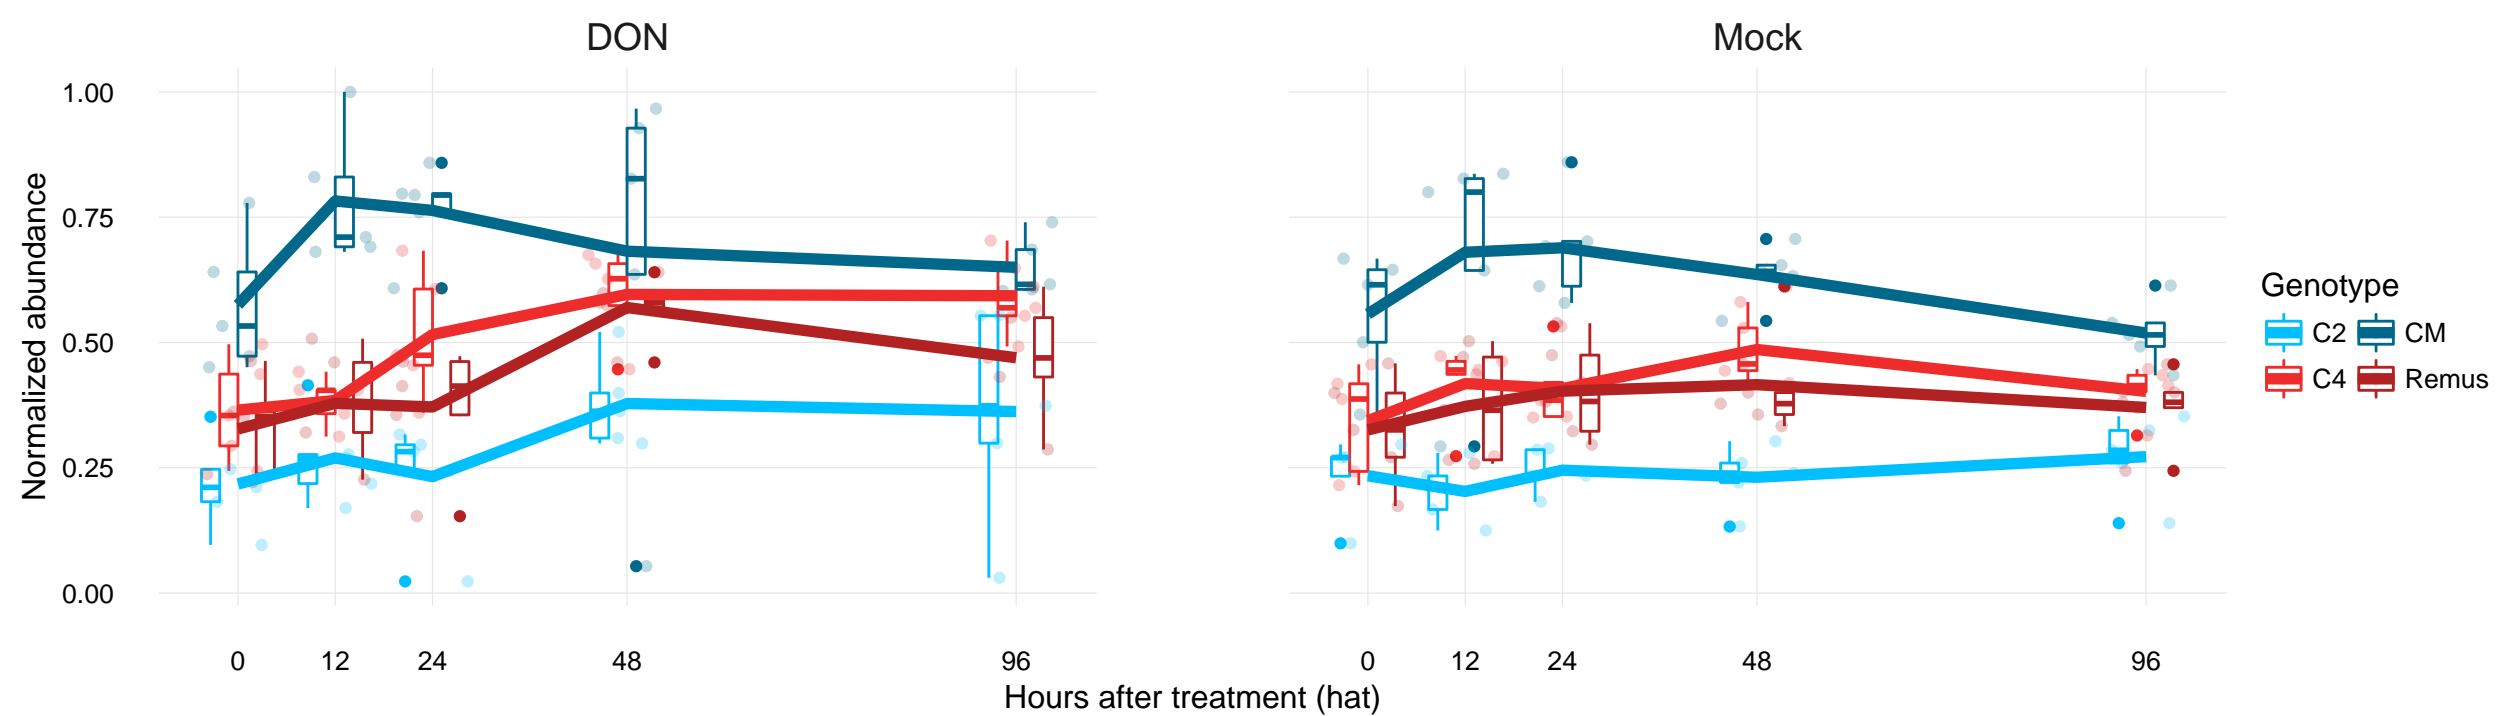

# A.117

Annotated as Flavonoid (GlcF)  
(52 database hits)

|                |                          |
|----------------|--------------------------|
| MZ             | 493.1341                 |
| RT             | 18.65 min                |
| Normalization  | Directly via KPX samples |
| Cluster        | Cluster 4                |
| Cn total / Phe | 23 /                     |

## C2, C4; different treatments

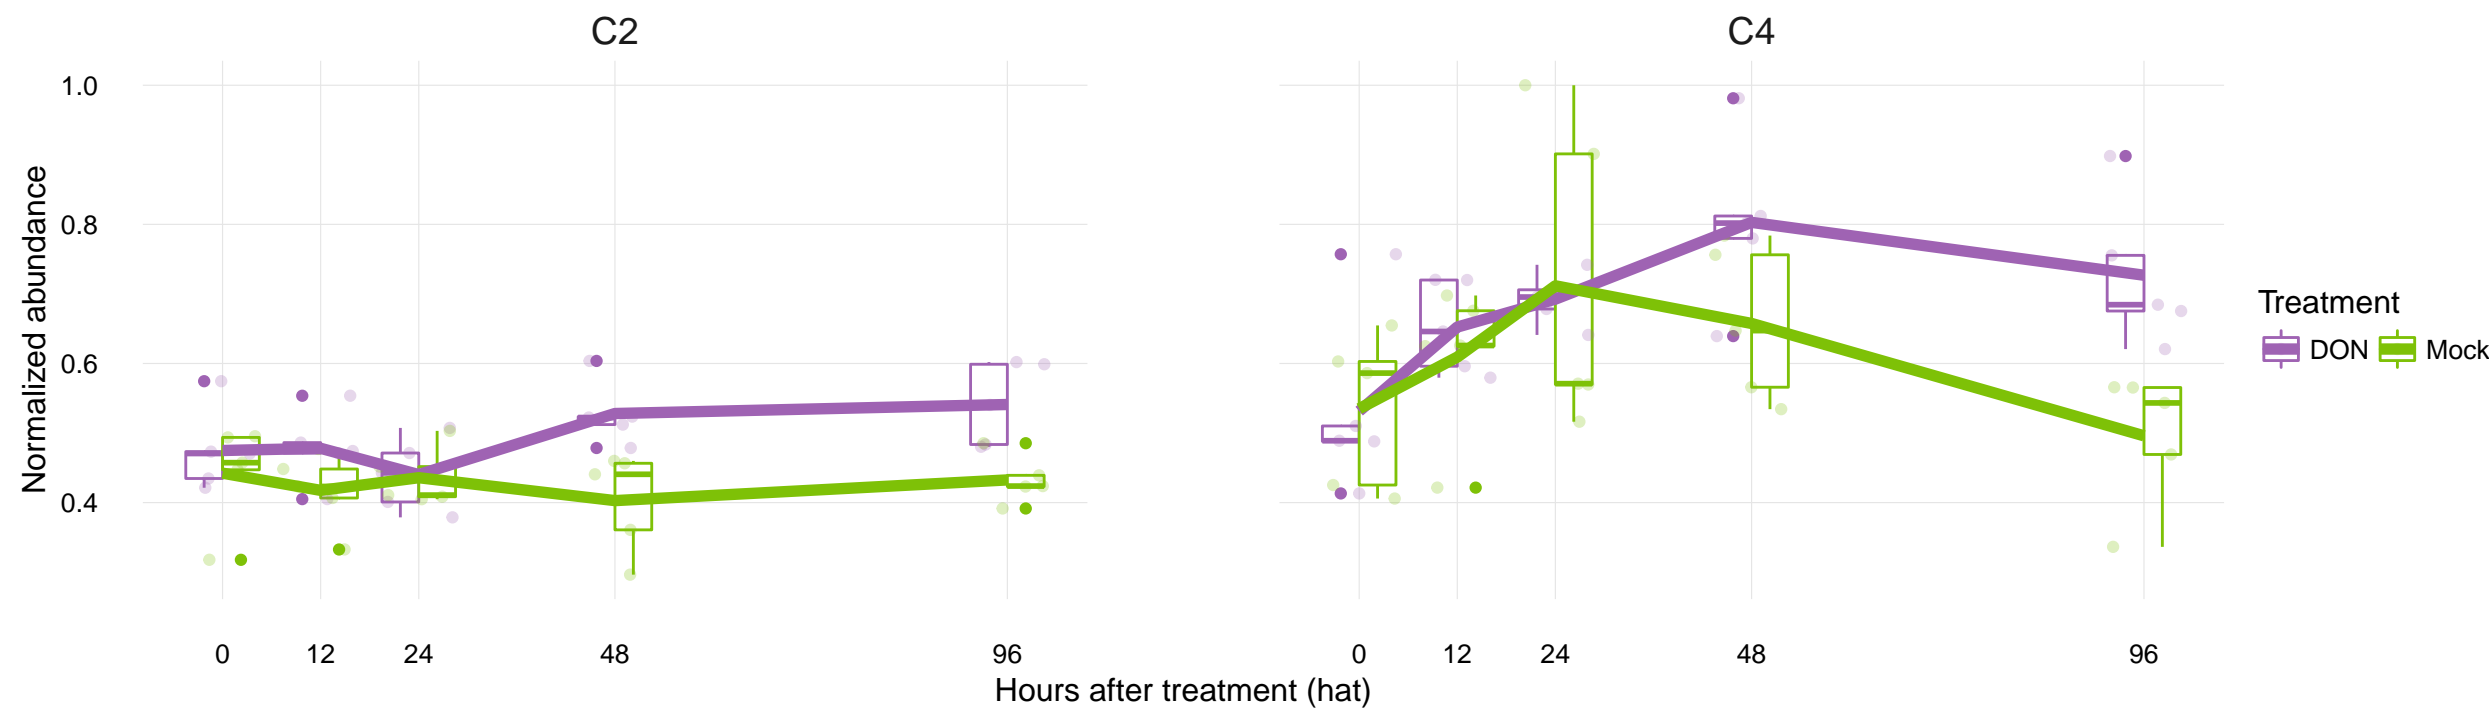

## DON, Mock; different genotypes

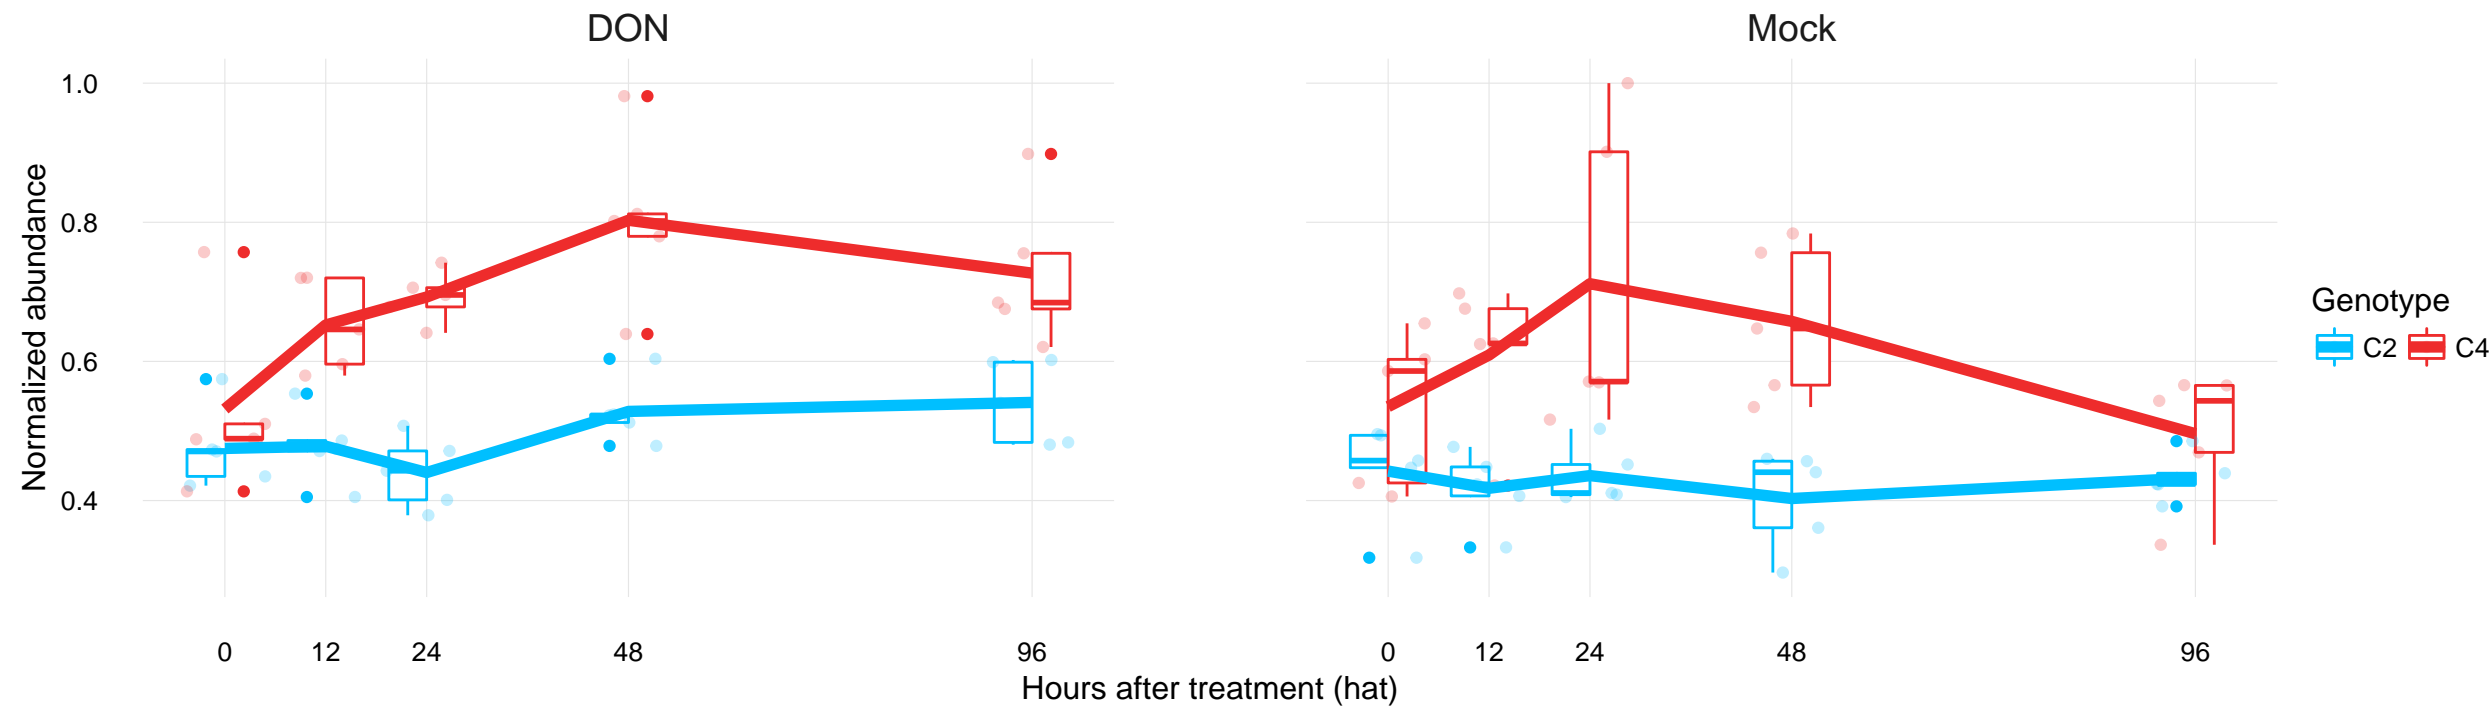

## CM, Remus; different treatments

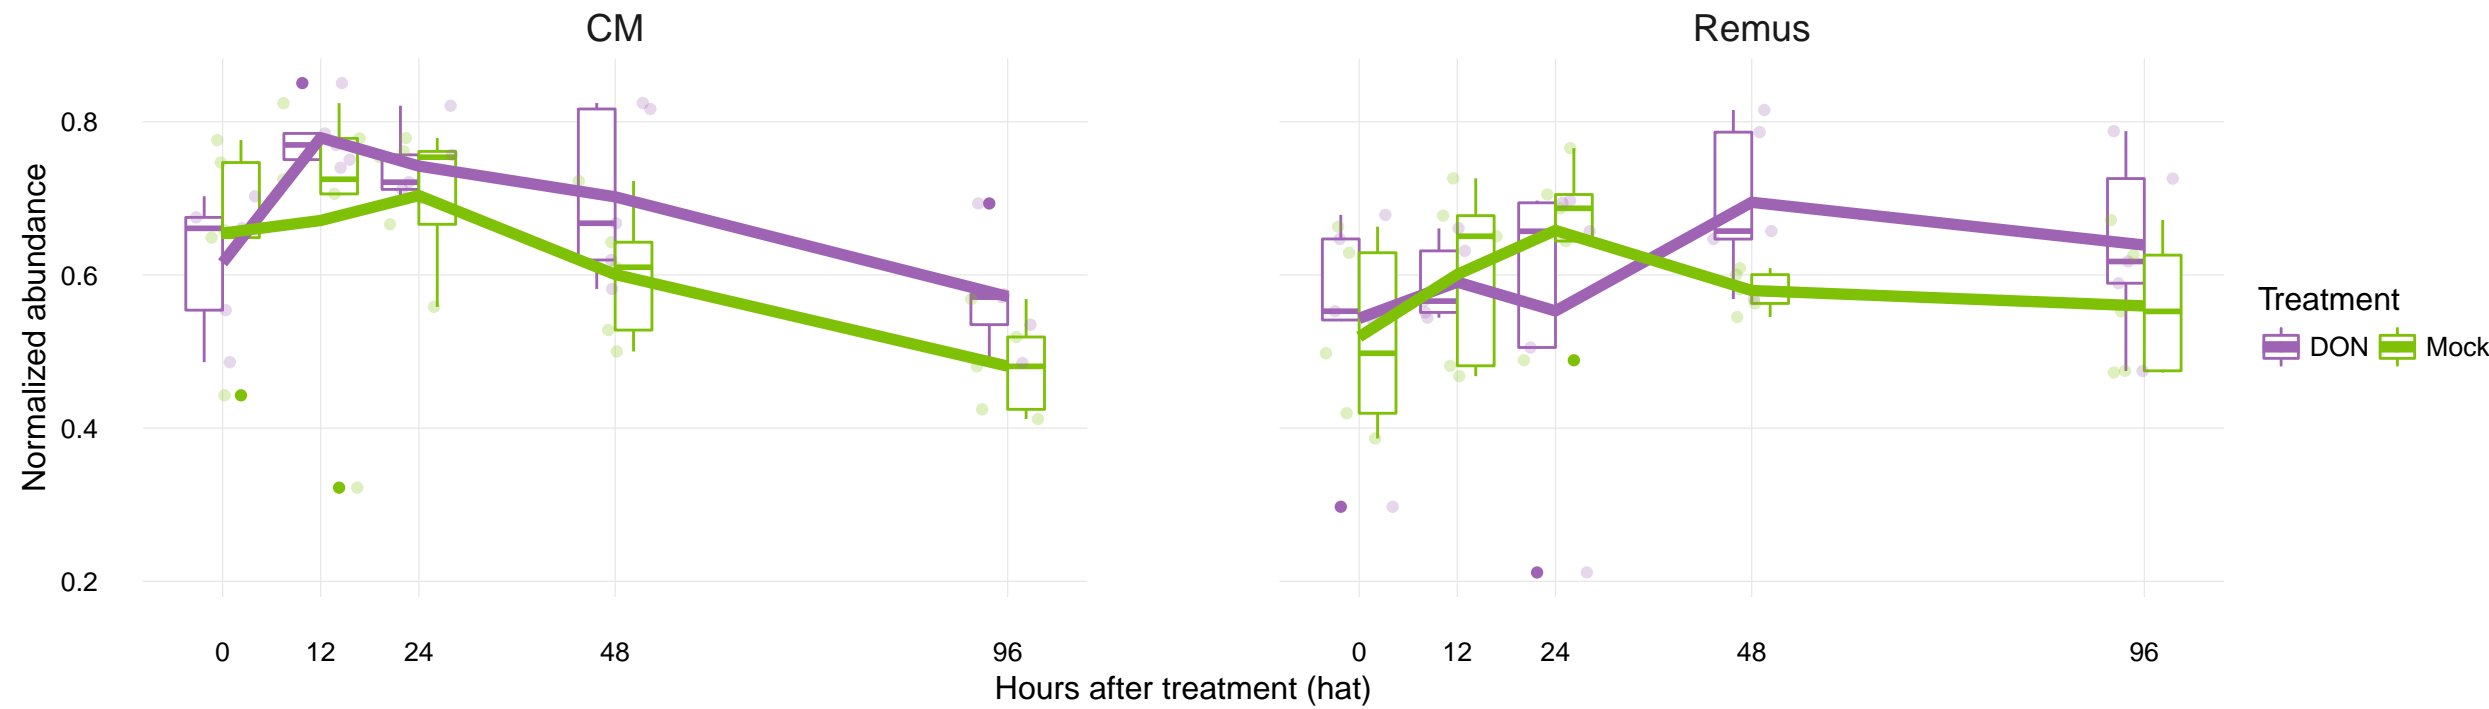

## DON, Mock; all four genotypes

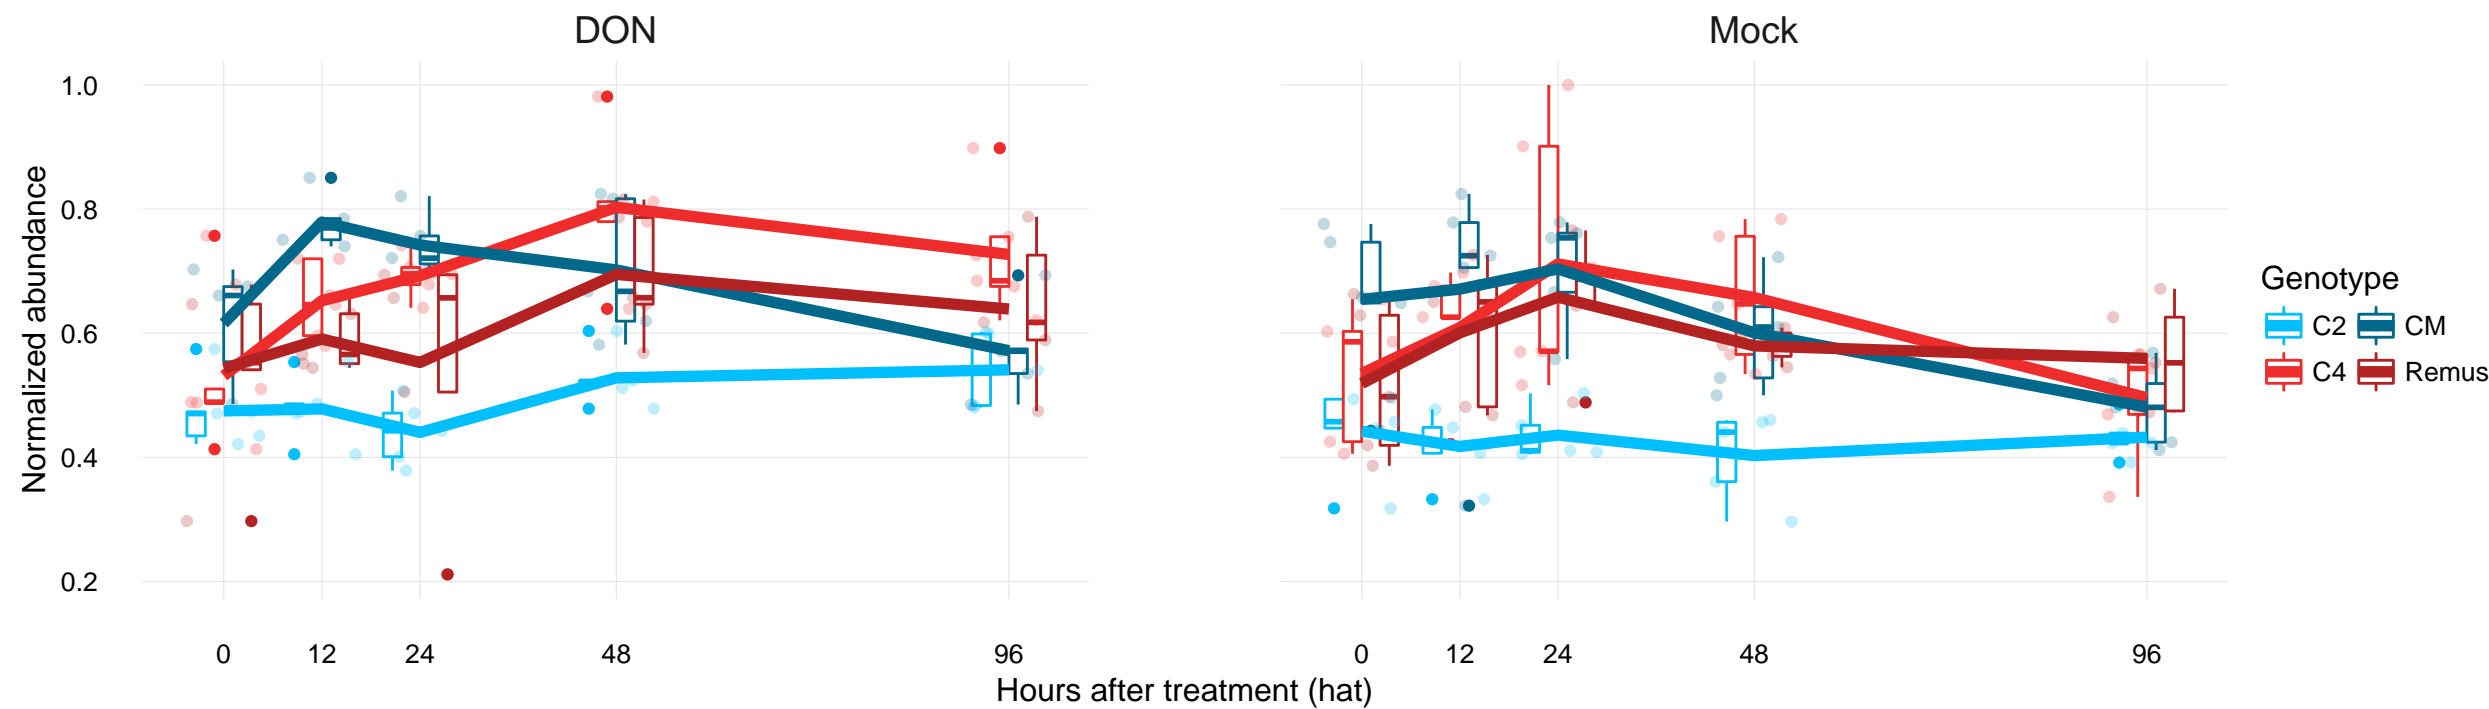

# A.110

Annotated as Flavonoid (diGlcF)  
(60 database hits)

|                |                          |
|----------------|--------------------------|
| MZ             | 647.158                  |
| RT             | 17.81 min                |
| Normalization  | Directly via KPX samples |
| Cluster        | Cluster 4                |
| Cn total / Phe | 28 /                     |

## C2, C4; different treatments

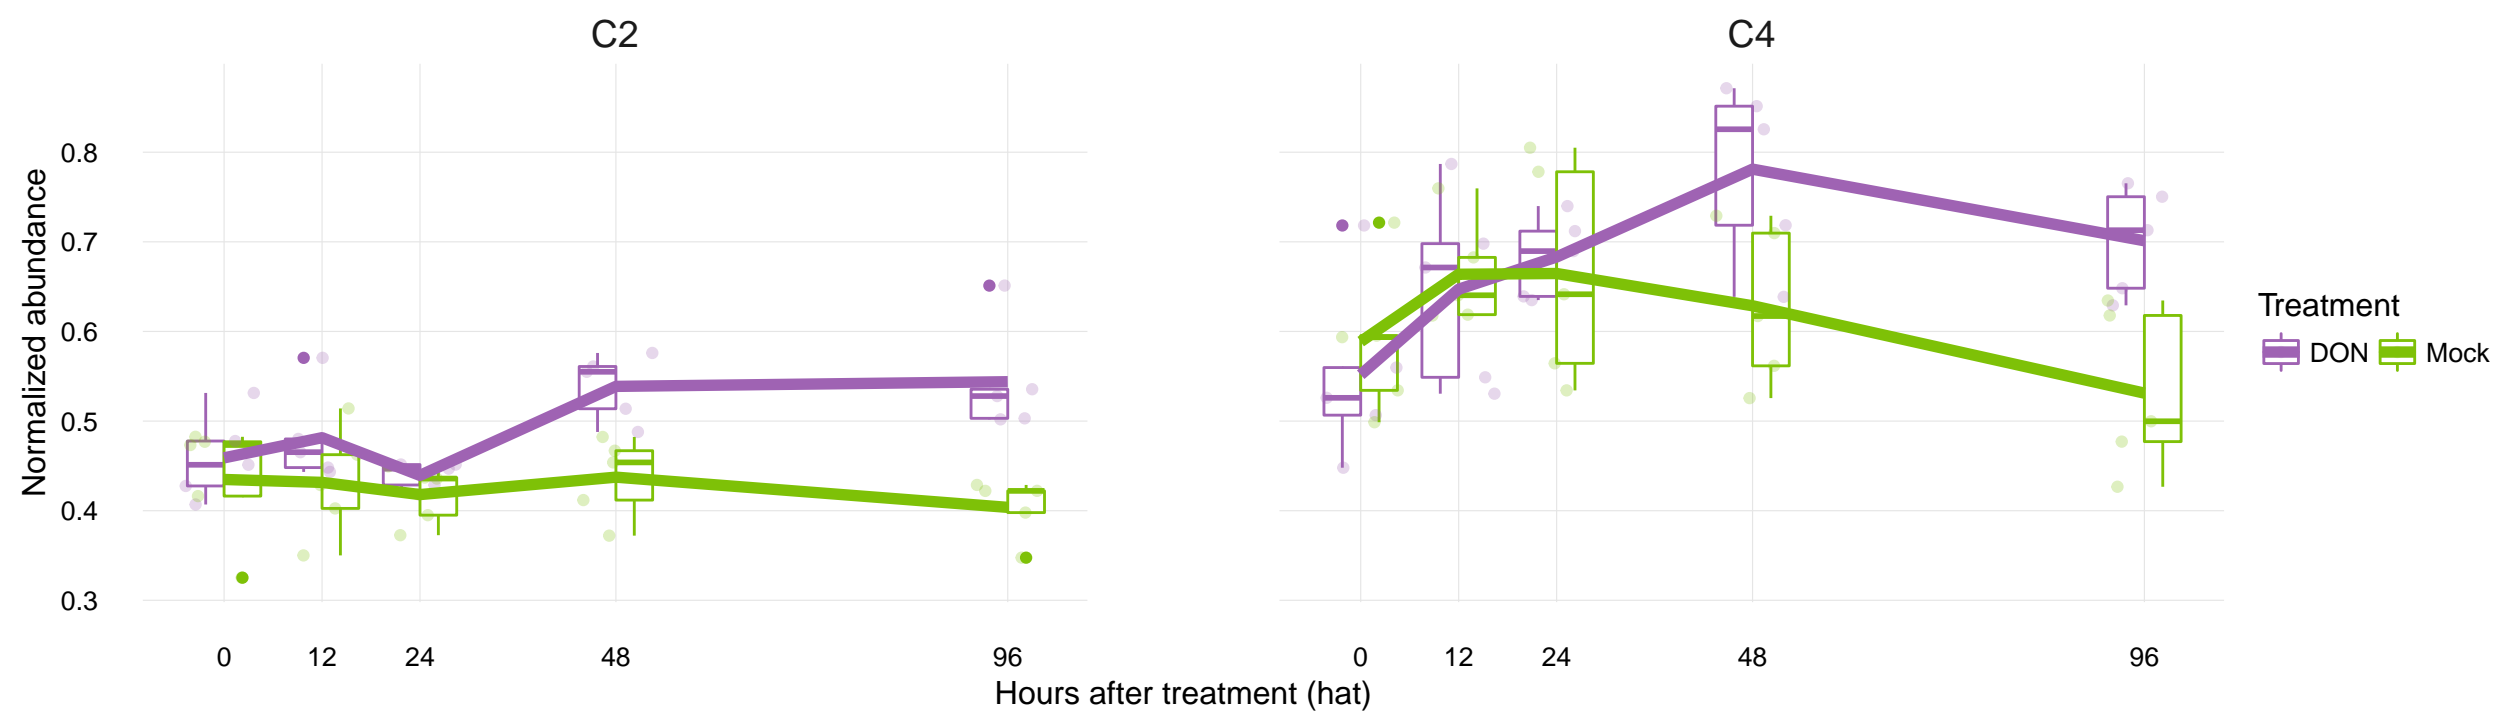

## DON, Mock; different genotypes

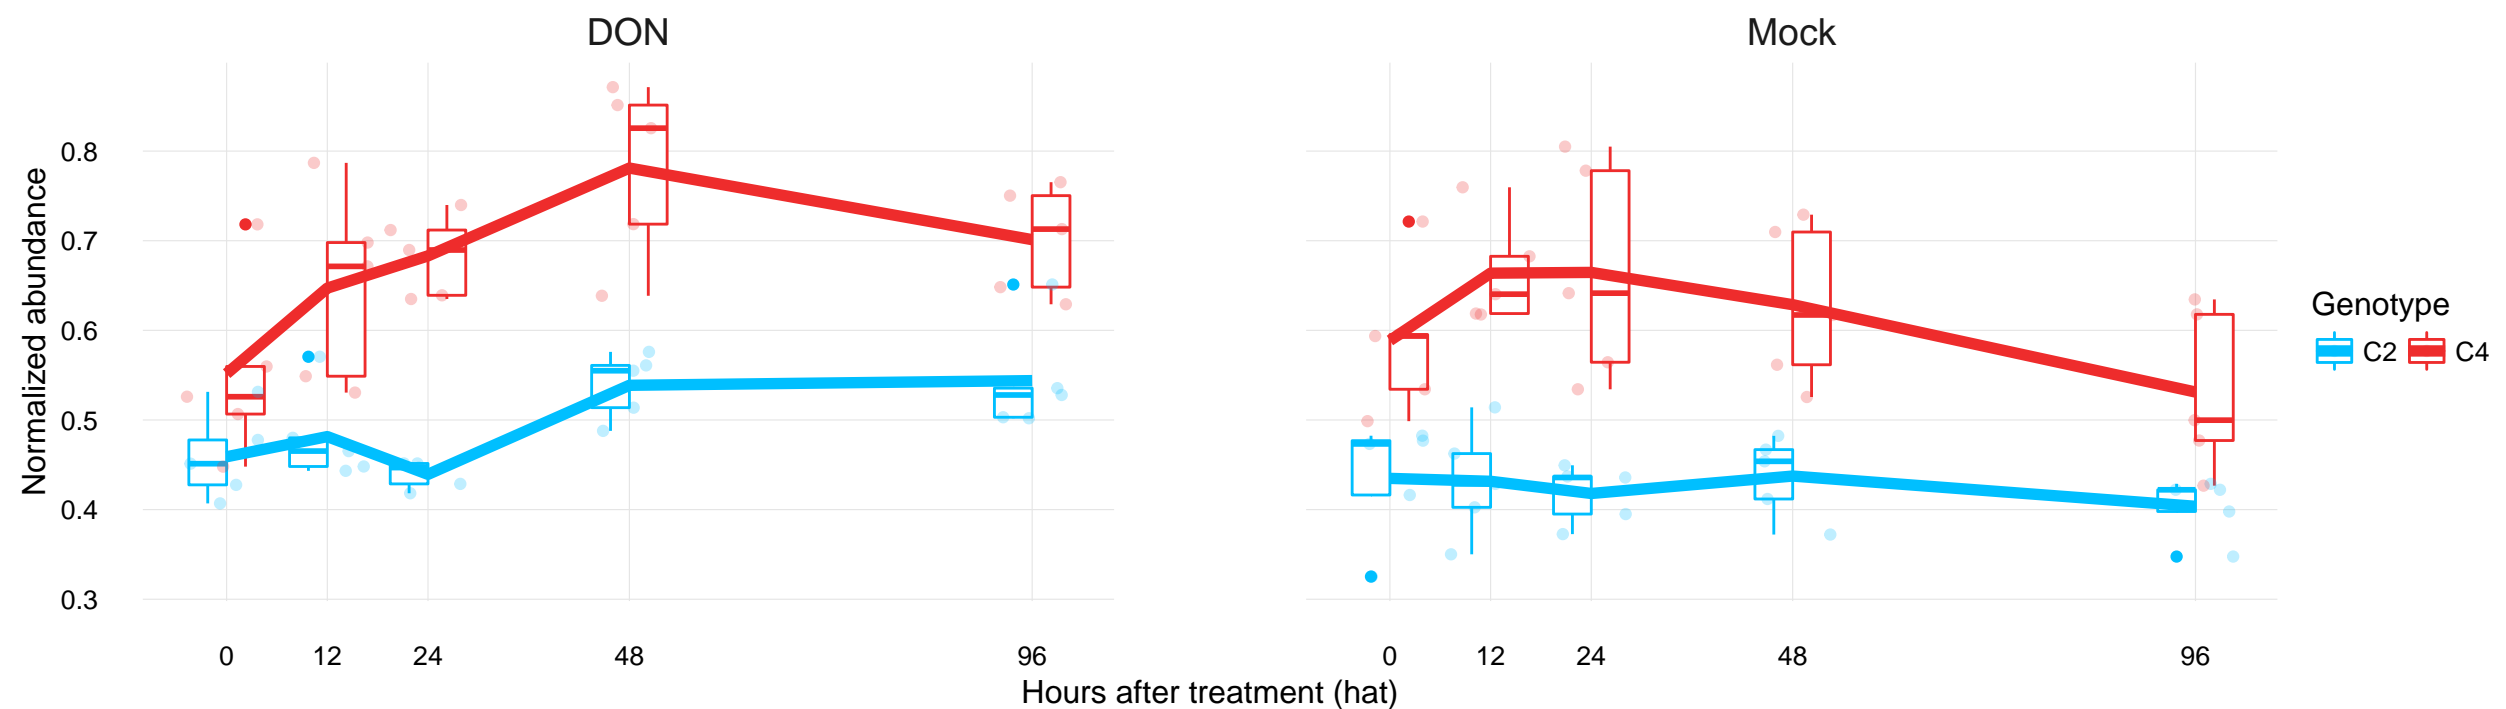

## CM, Remus; different treatments

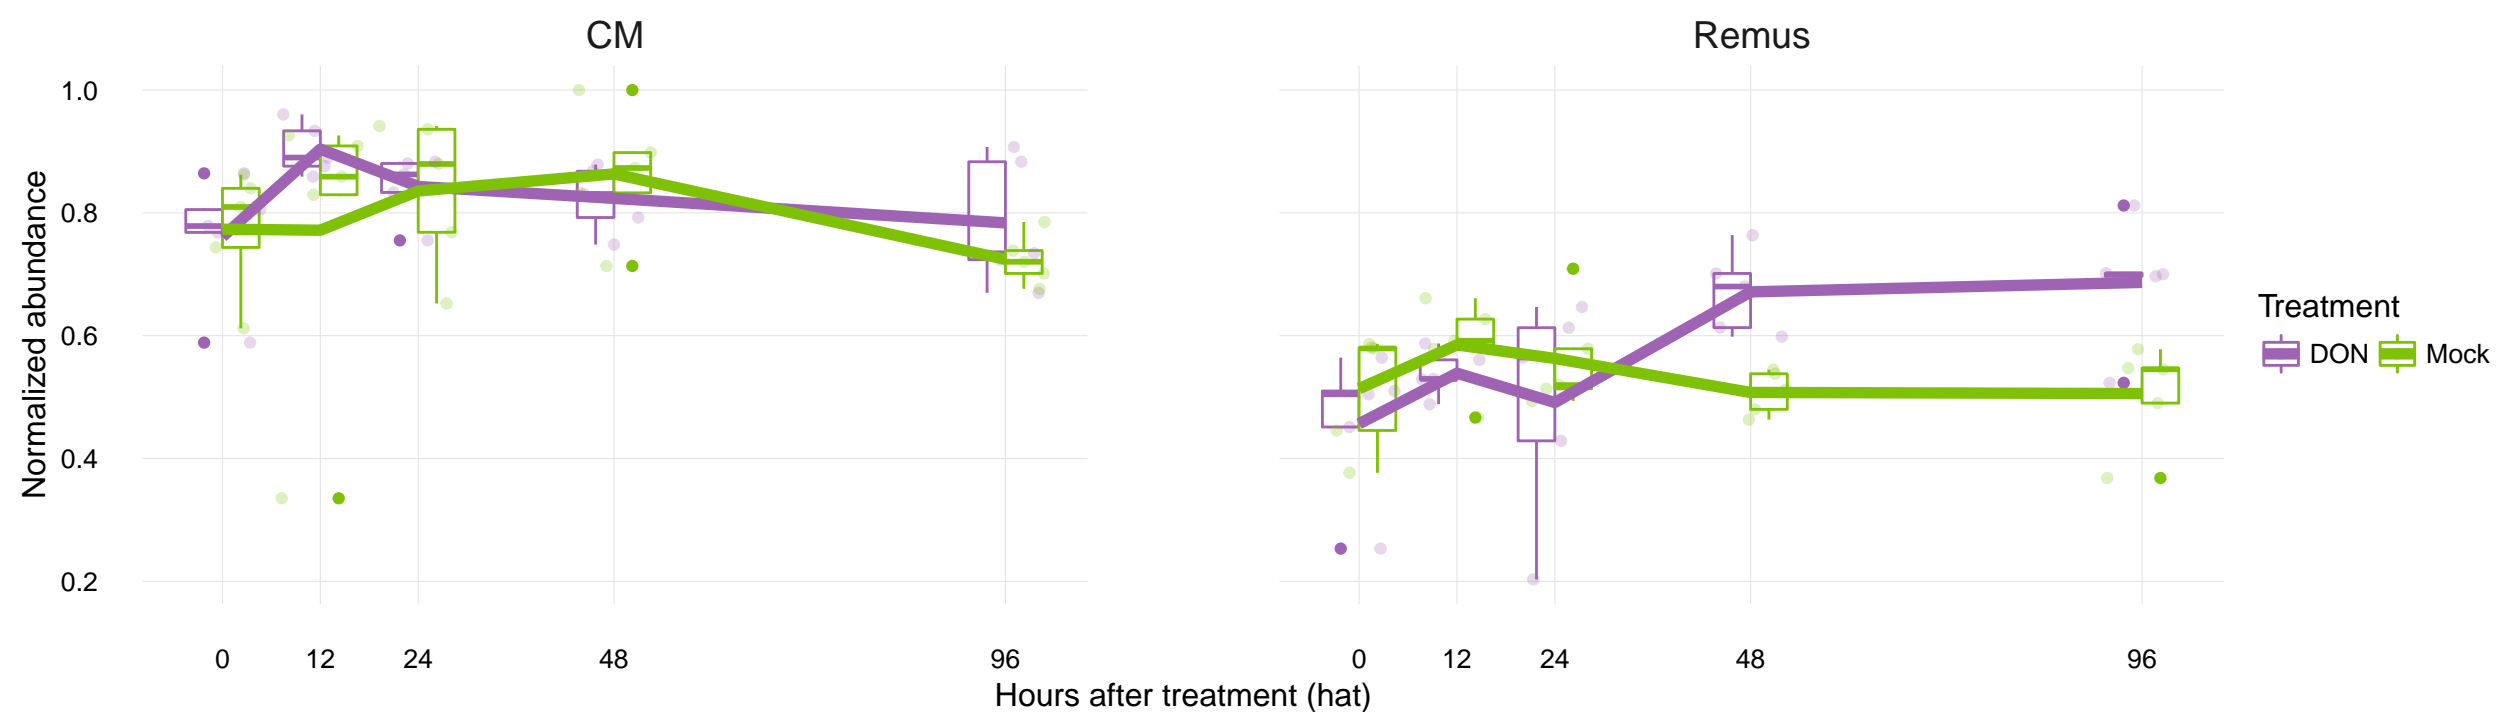

## DON, Mock; all four genotypes

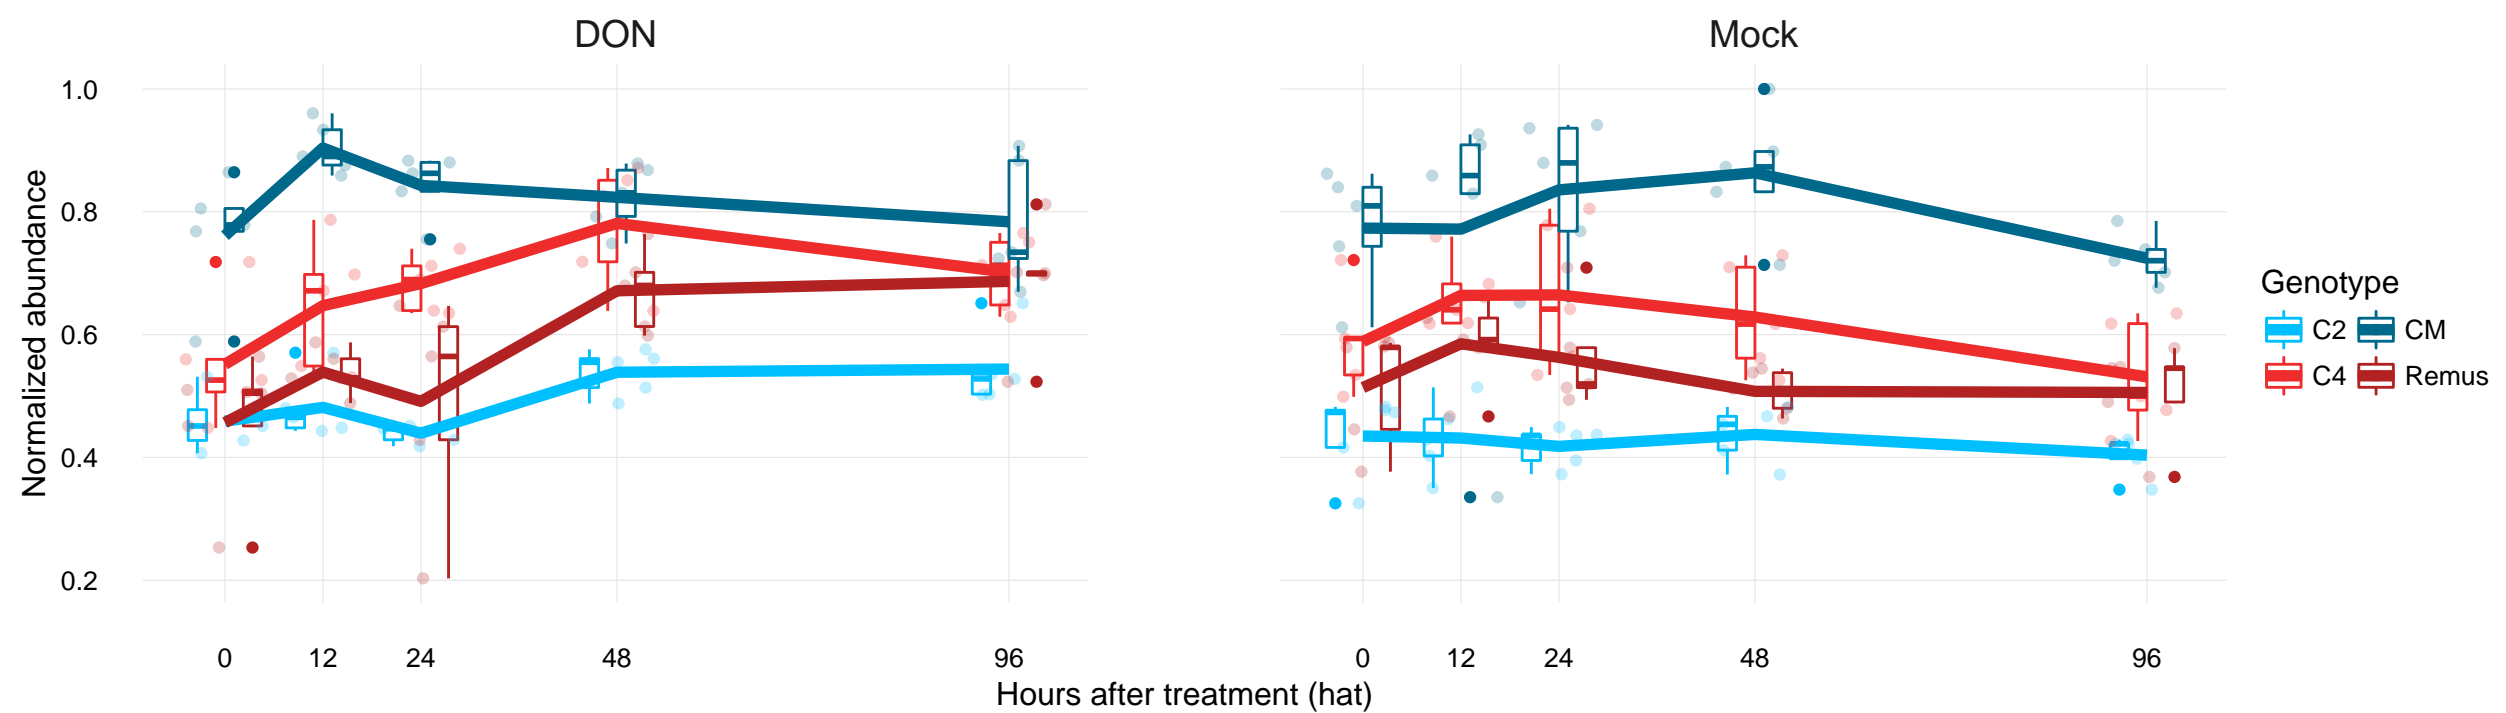

A.85

Annotated as Flavonoid (diGlcF)  
(58 database hits)

|                |                          |
|----------------|--------------------------|
| MZ             | 579.171                  |
| RT             | 14.99 min                |
| Normalization  | Directly via KPX samples |
| Cluster        | Cluster 4                |
| Cn total / Phe | 27 /                     |

C2, C4; different treatments

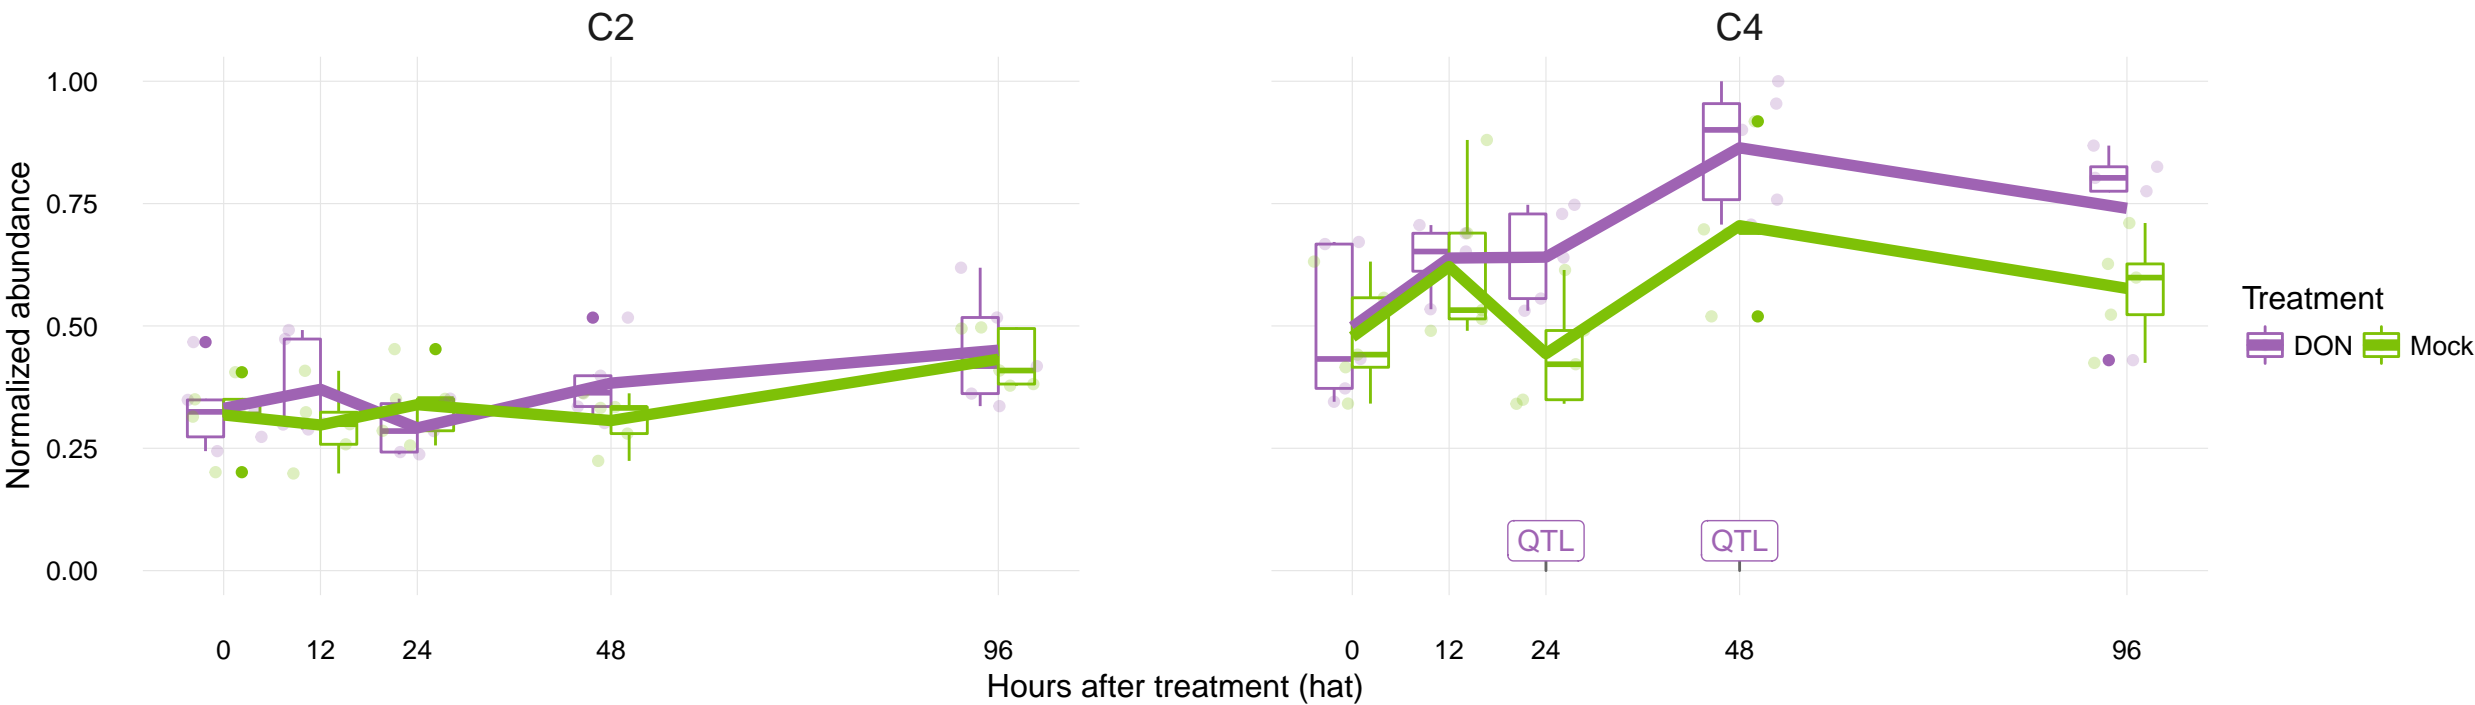

DON, Mock; different genotypes

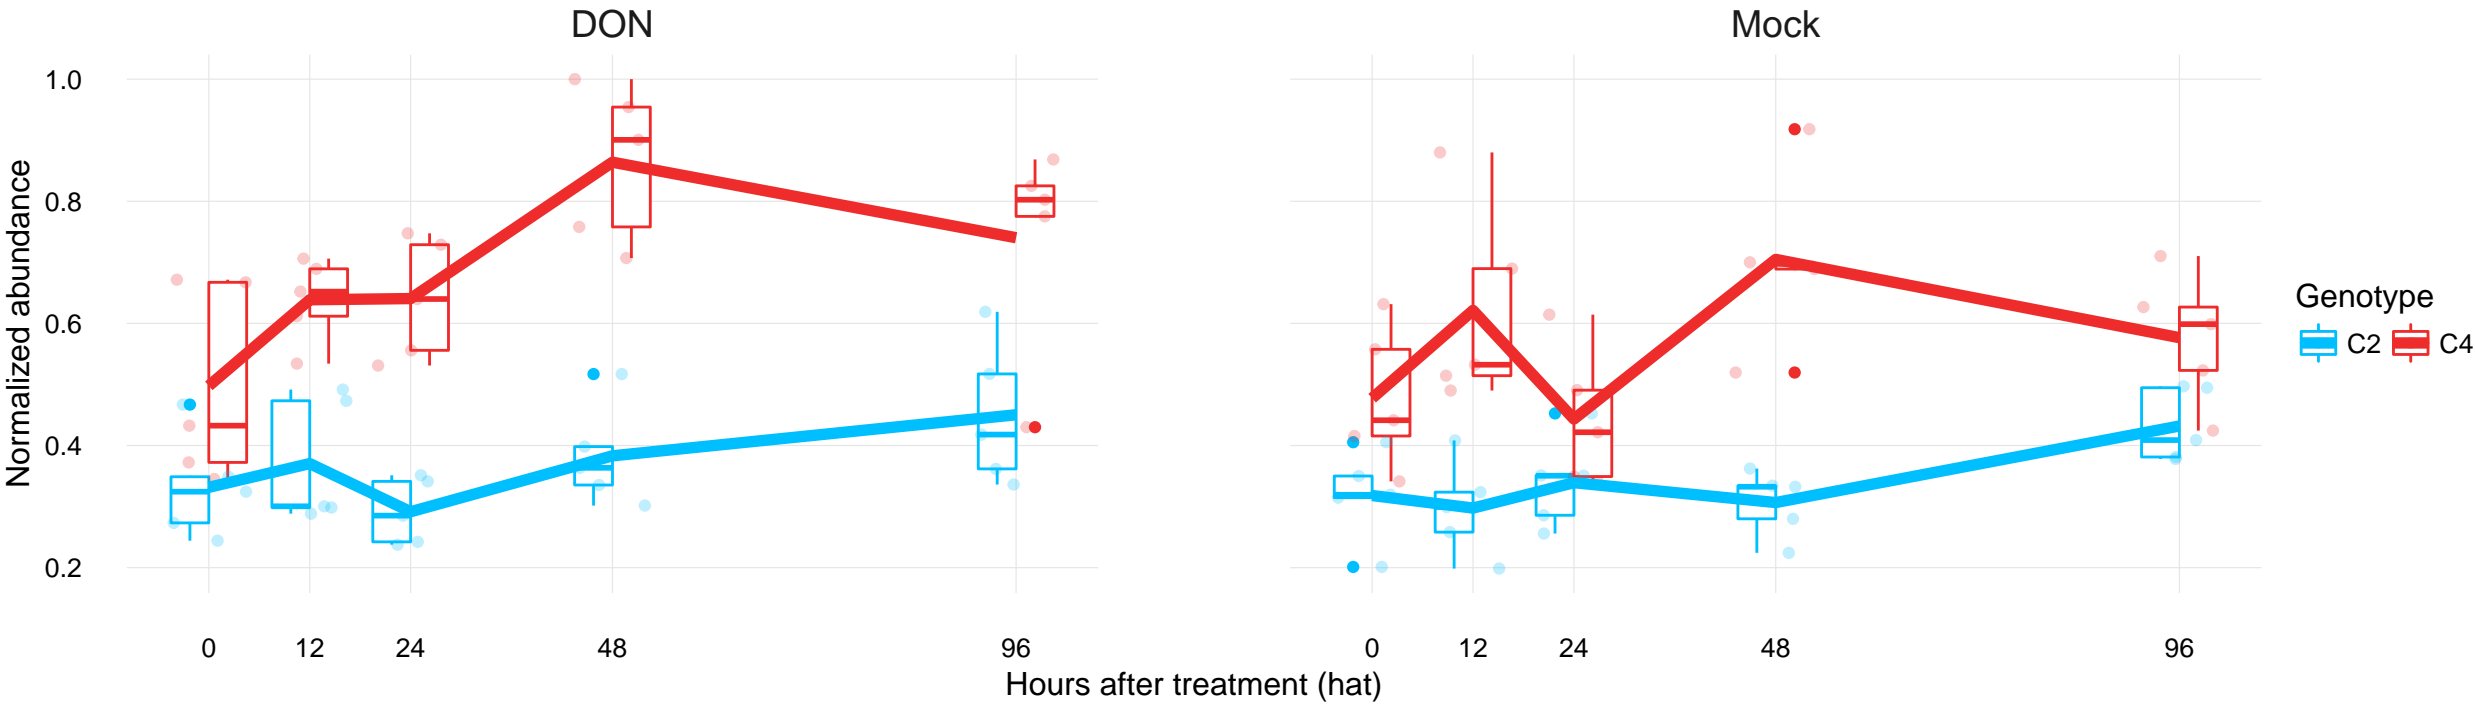

CM, Remus; different treatments

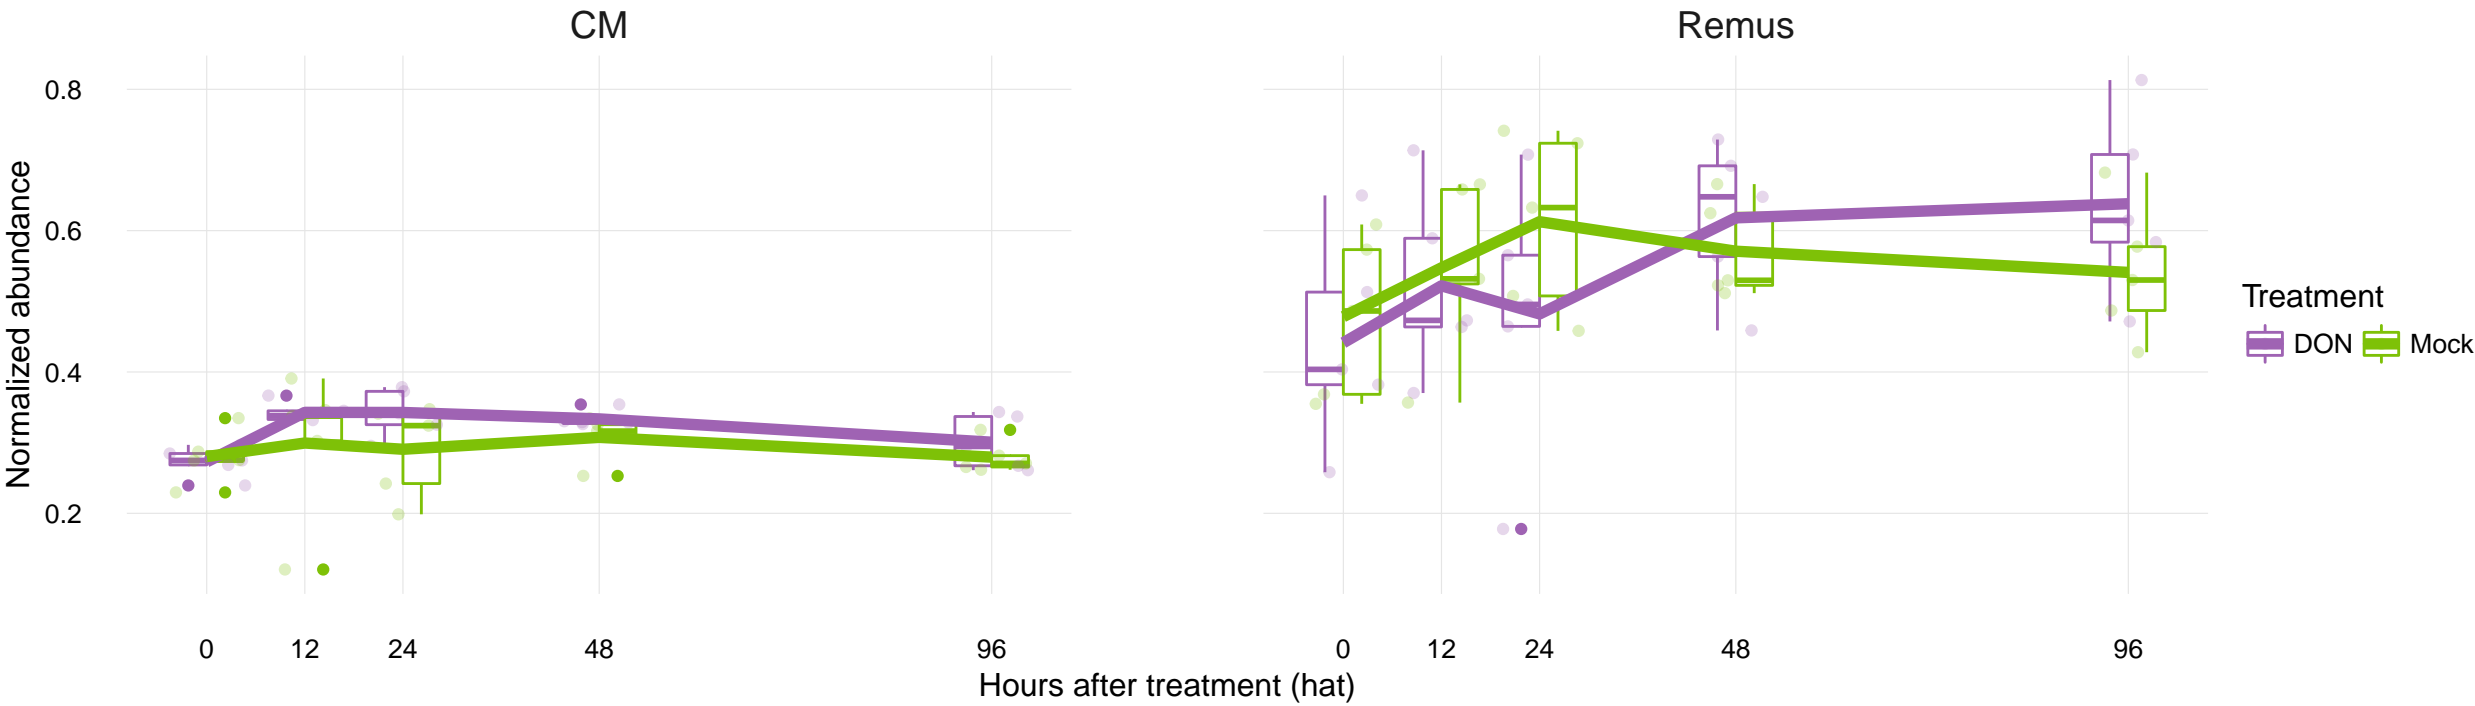

DON, Mock; all four genotypes

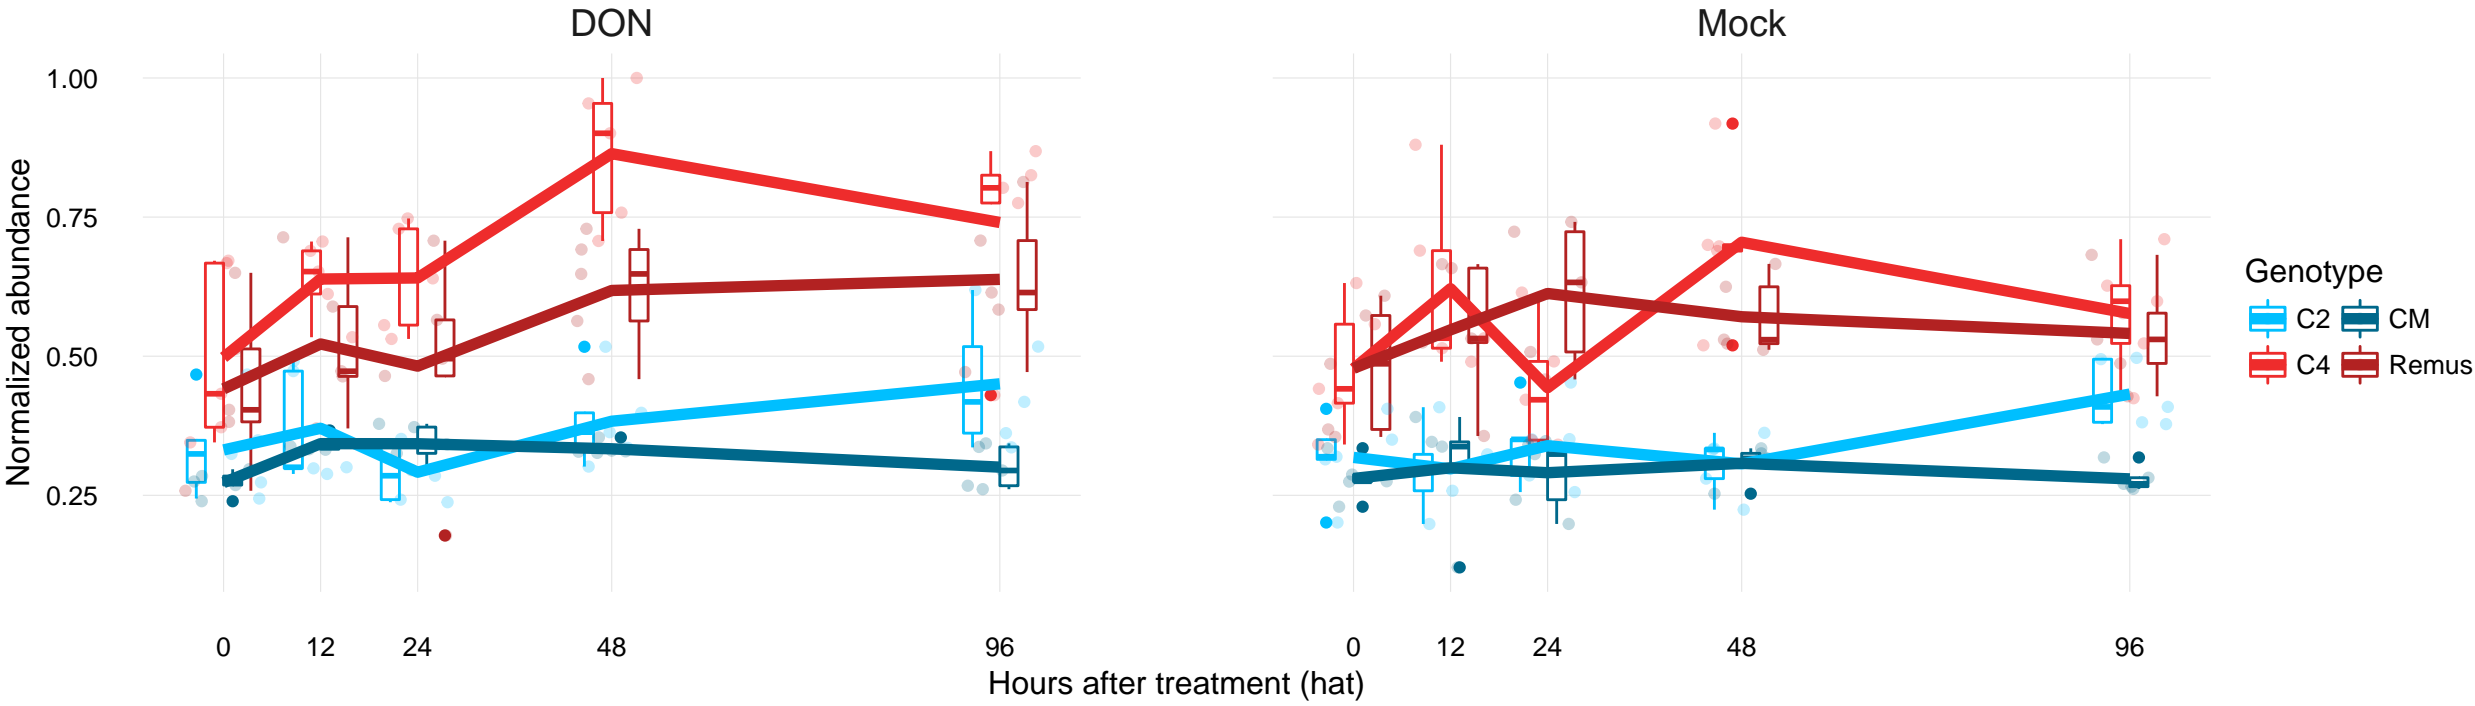

# A.69

Annotated as Flavonoid (diGlcF)  
(57 database hits)

|                |                          |
|----------------|--------------------------|
| MZ             | 565.1558                 |
| RT             | 13.44 min                |
| Normalization  | Directly via KPX samples |
| Cluster        | Cluster 4                |
| Cn total / Phe | 26 / 9                   |

## C2, C4; different treatments

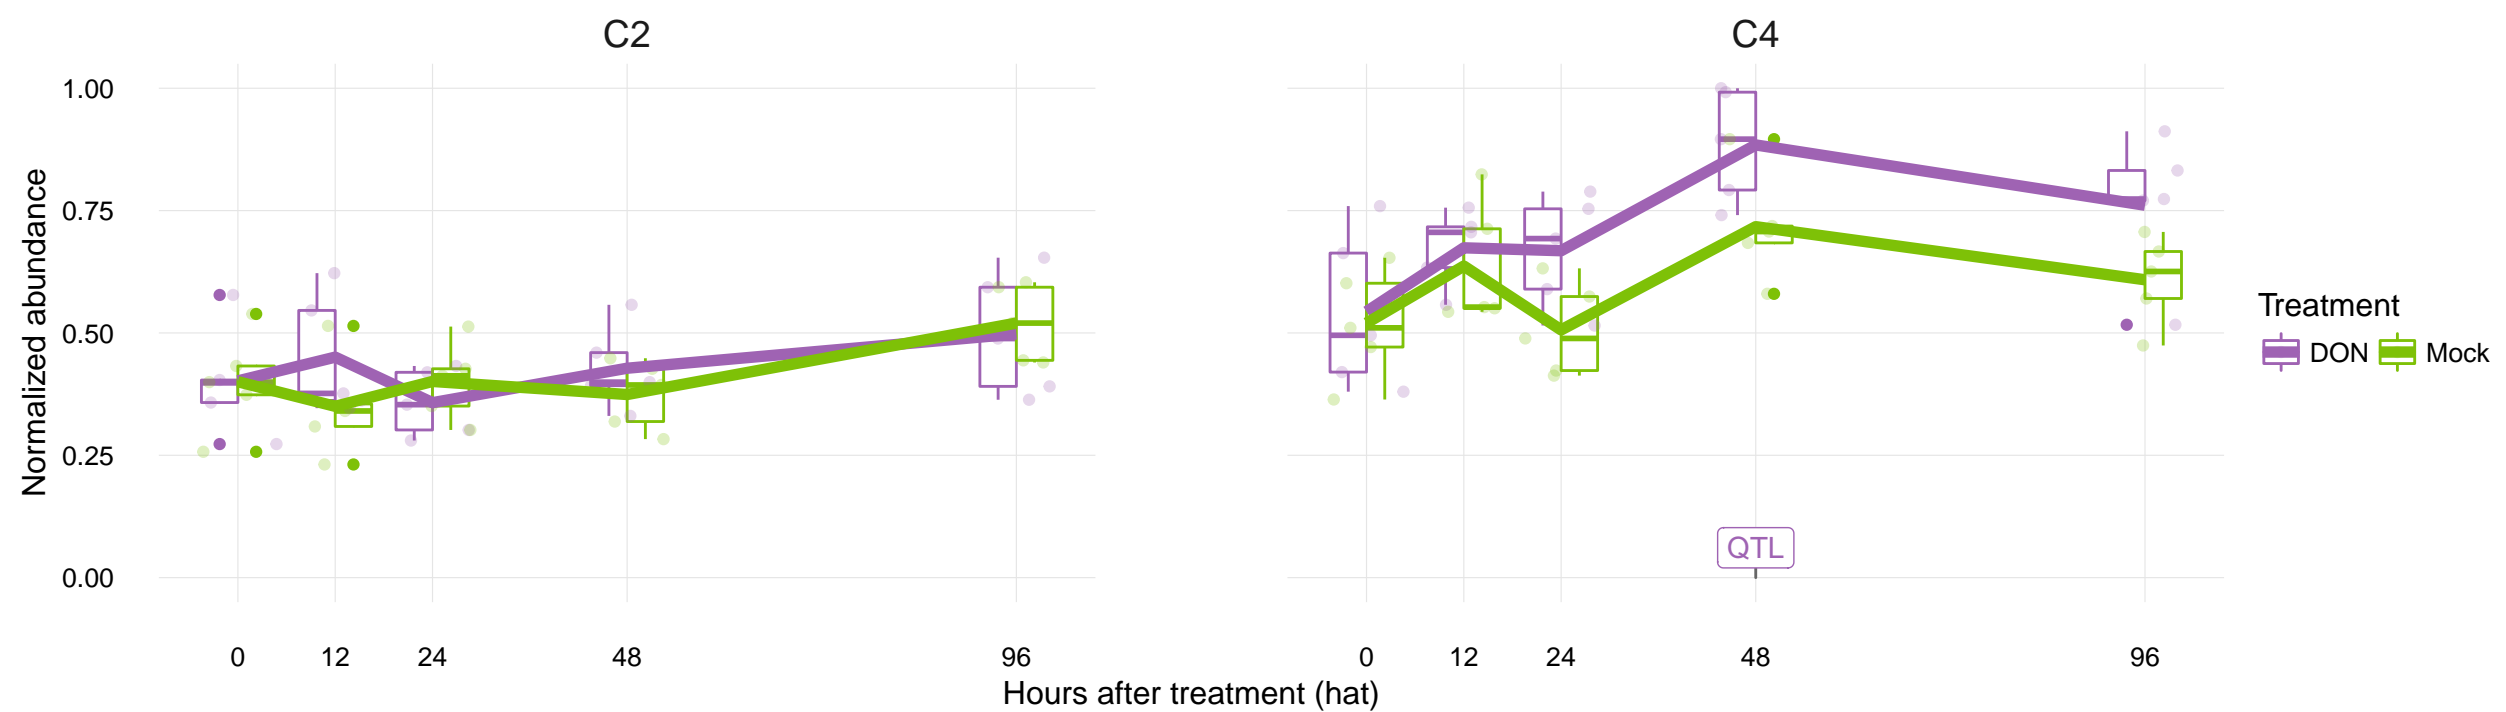

## DON, Mock; different genotypes

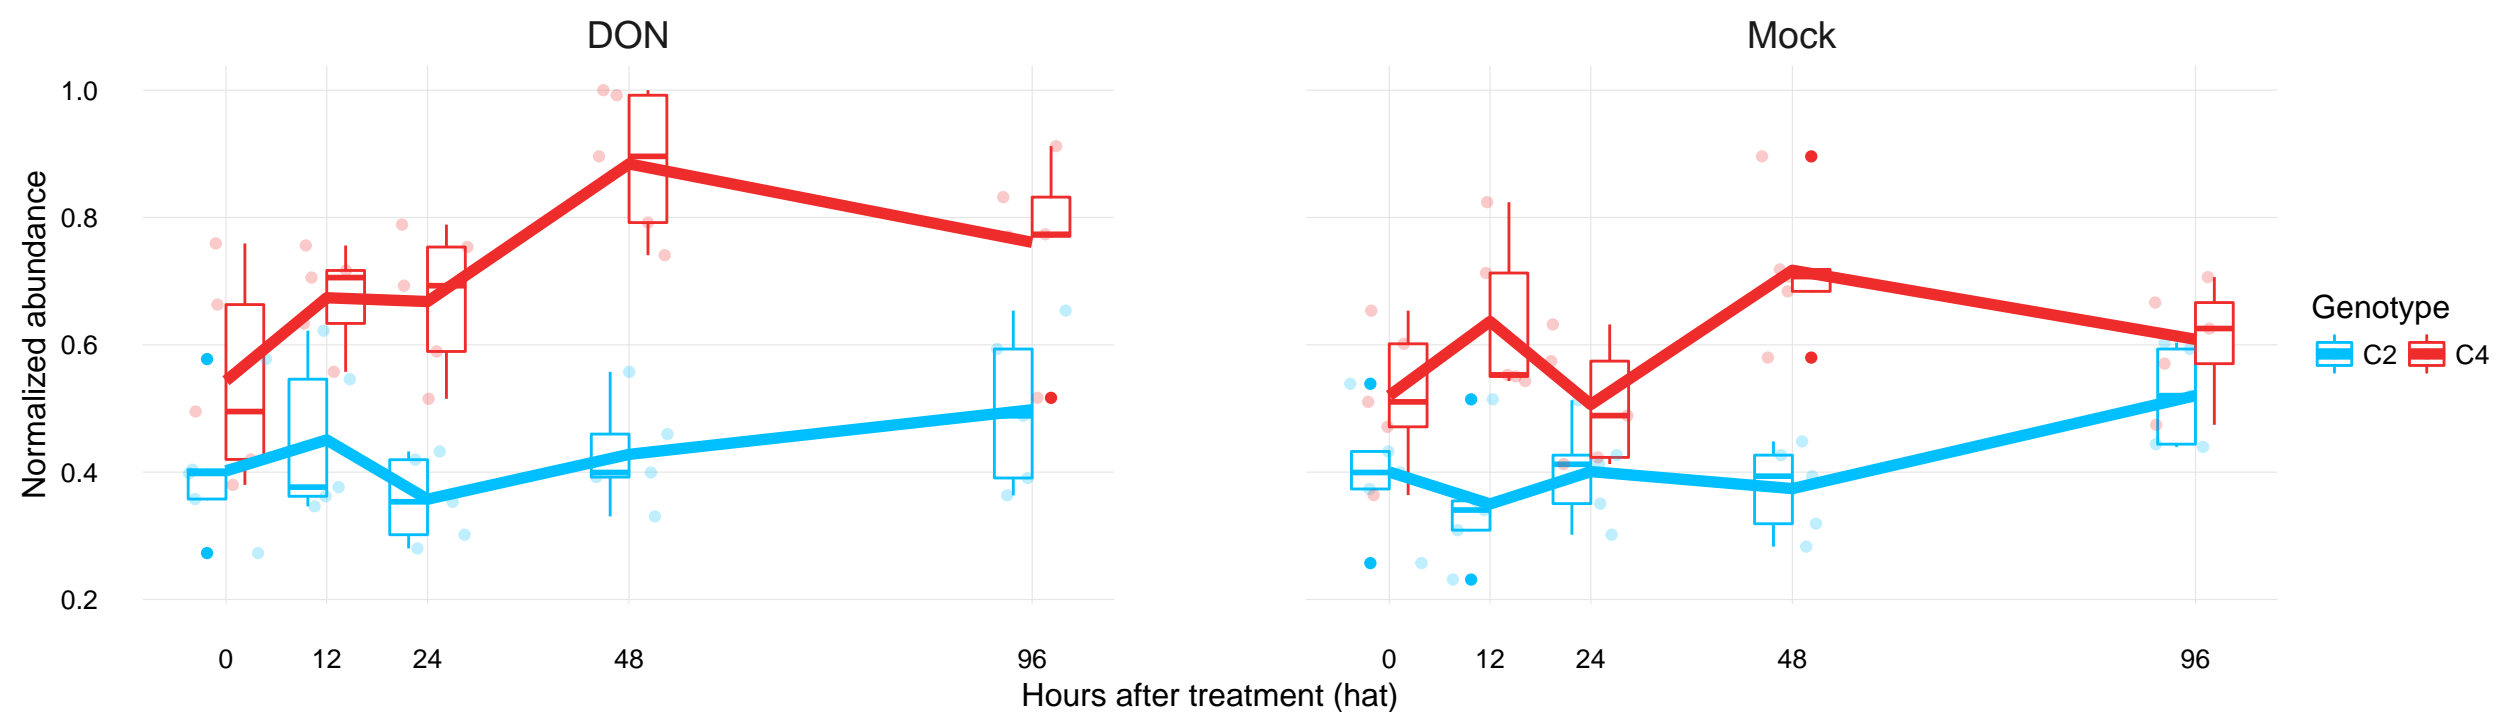

## CM, Remus; different treatments

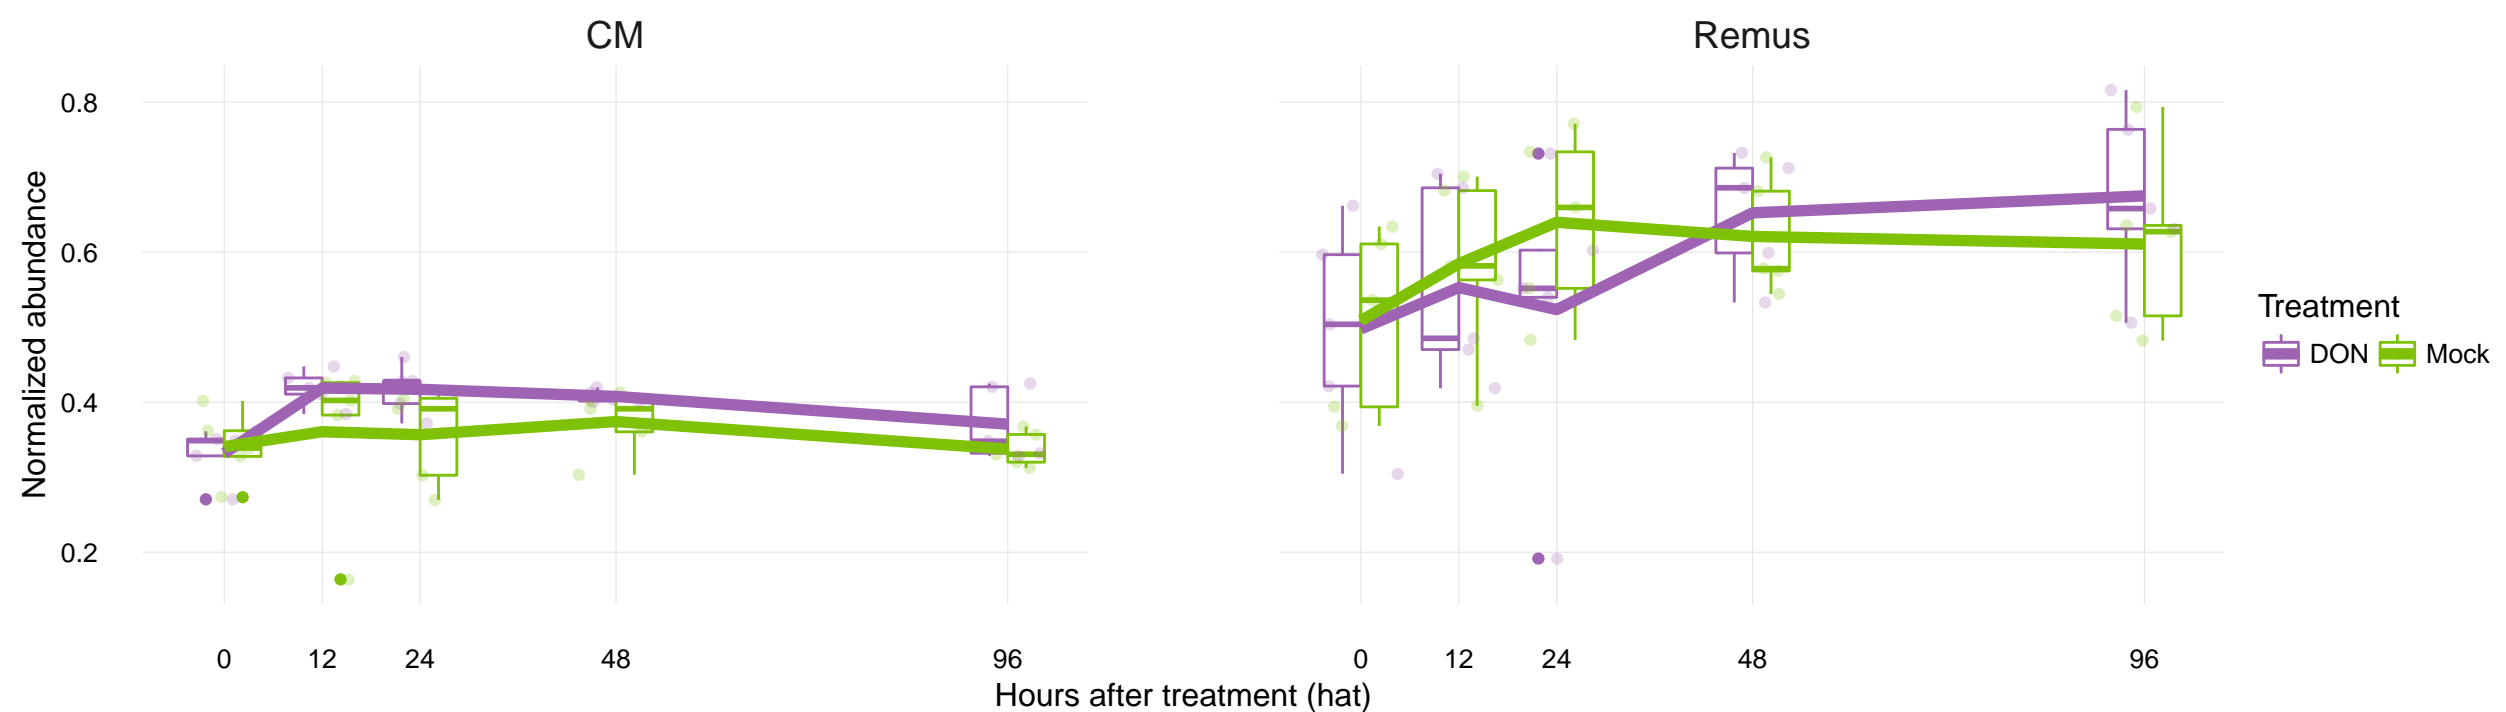

## DON, Mock; all four genotypes

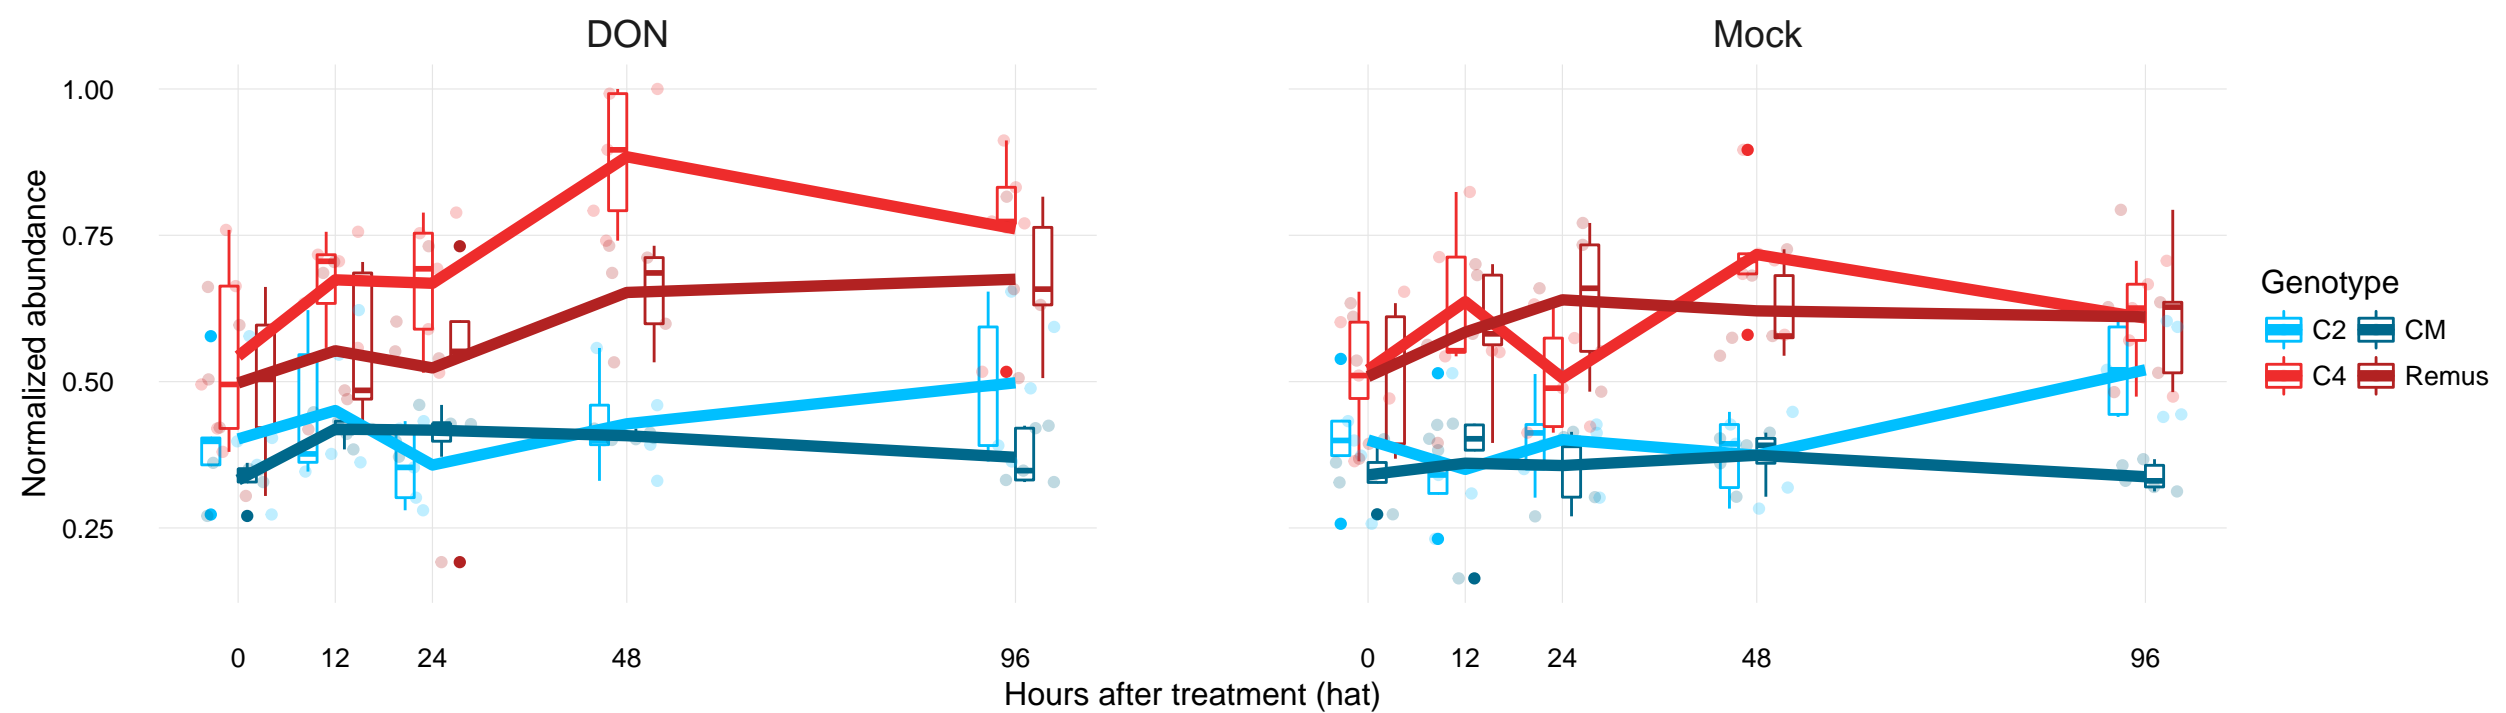

# A.84

Annotated as Flavonoid (diGlcF)  
(57 database hits)

|                |                          |
|----------------|--------------------------|
| MZ             | 565.1558                 |
| RT             | 14.9 min                 |
| Normalization  | Directly via KPX samples |
| Cluster        | Cluster 4                |
| Cn total / Phe | 26 /                     |

## C2, C4; different treatments

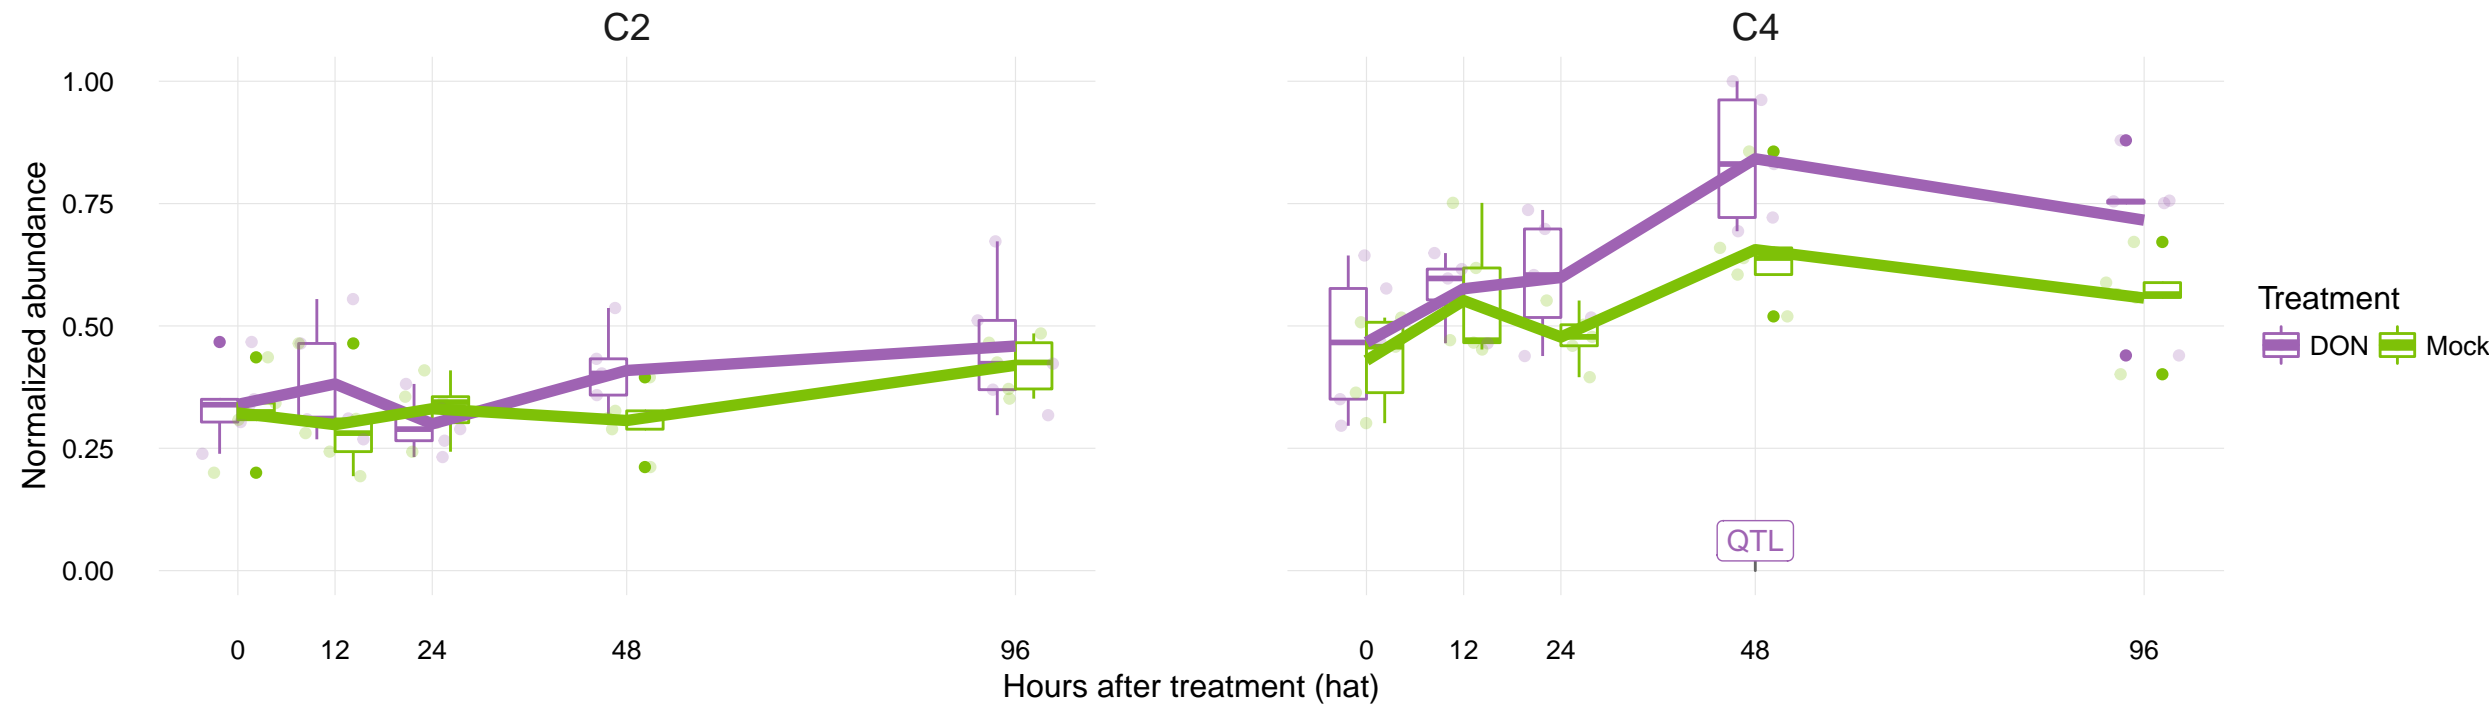

## DON, Mock; different genotypes

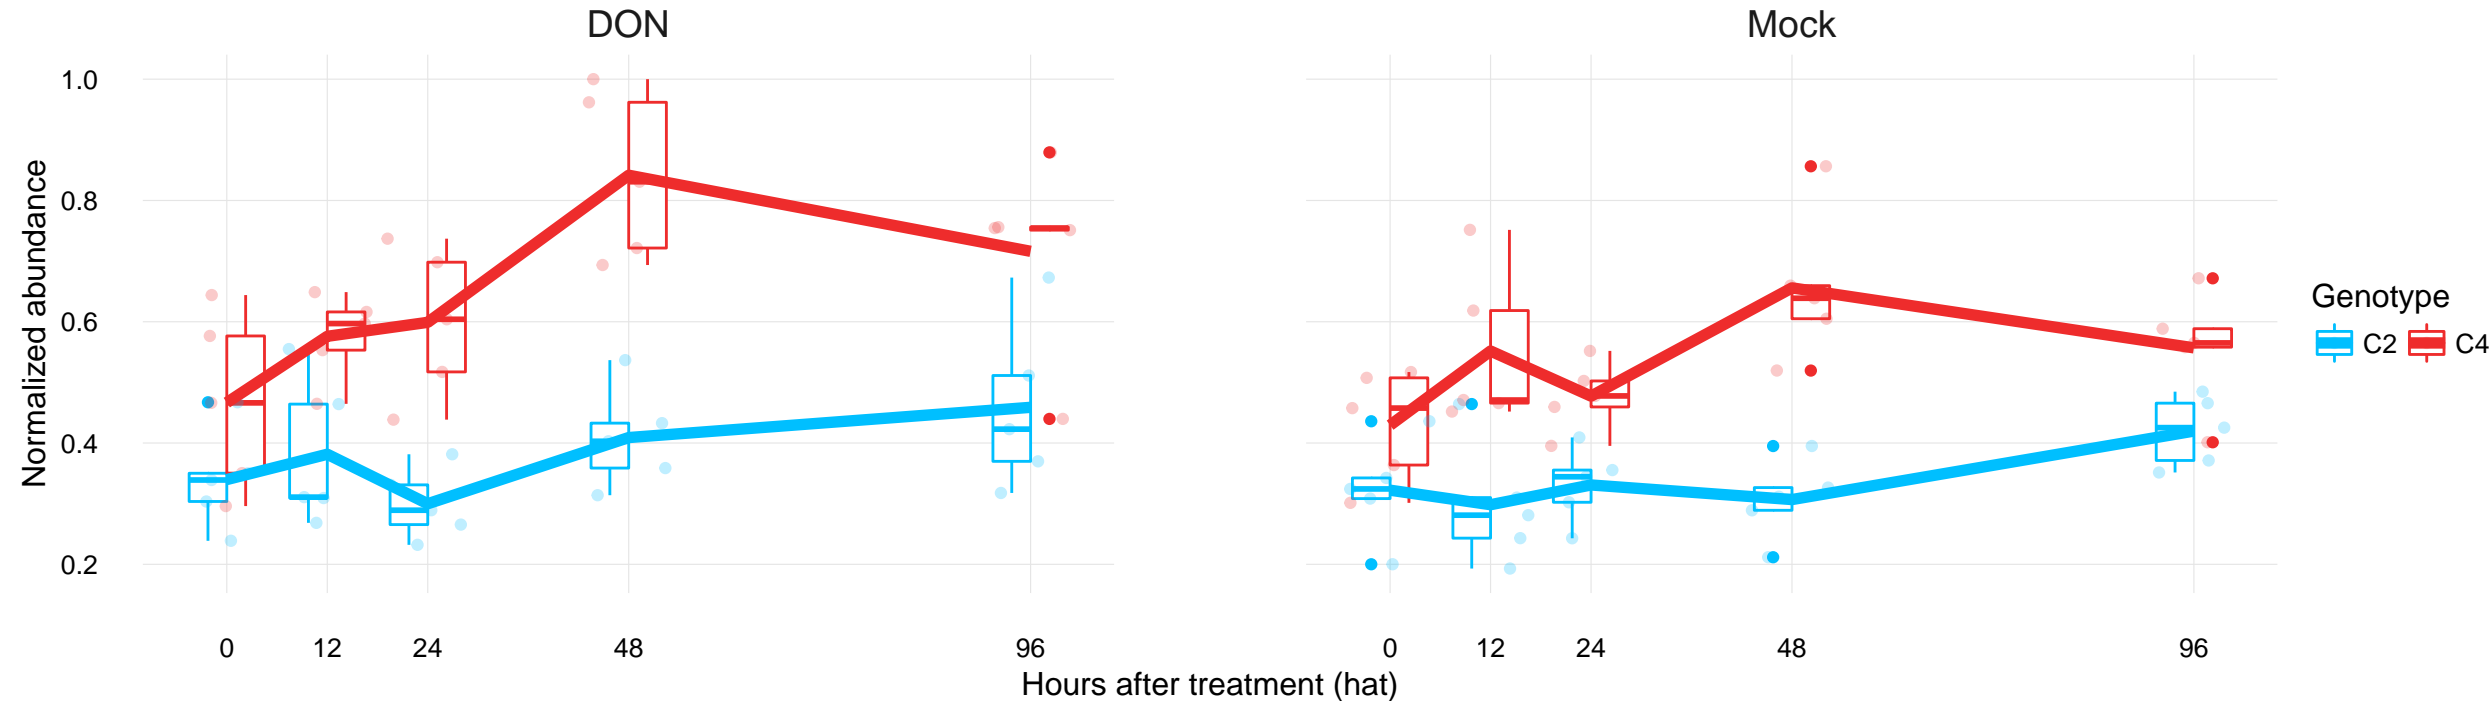

## CM, Remus; different treatments

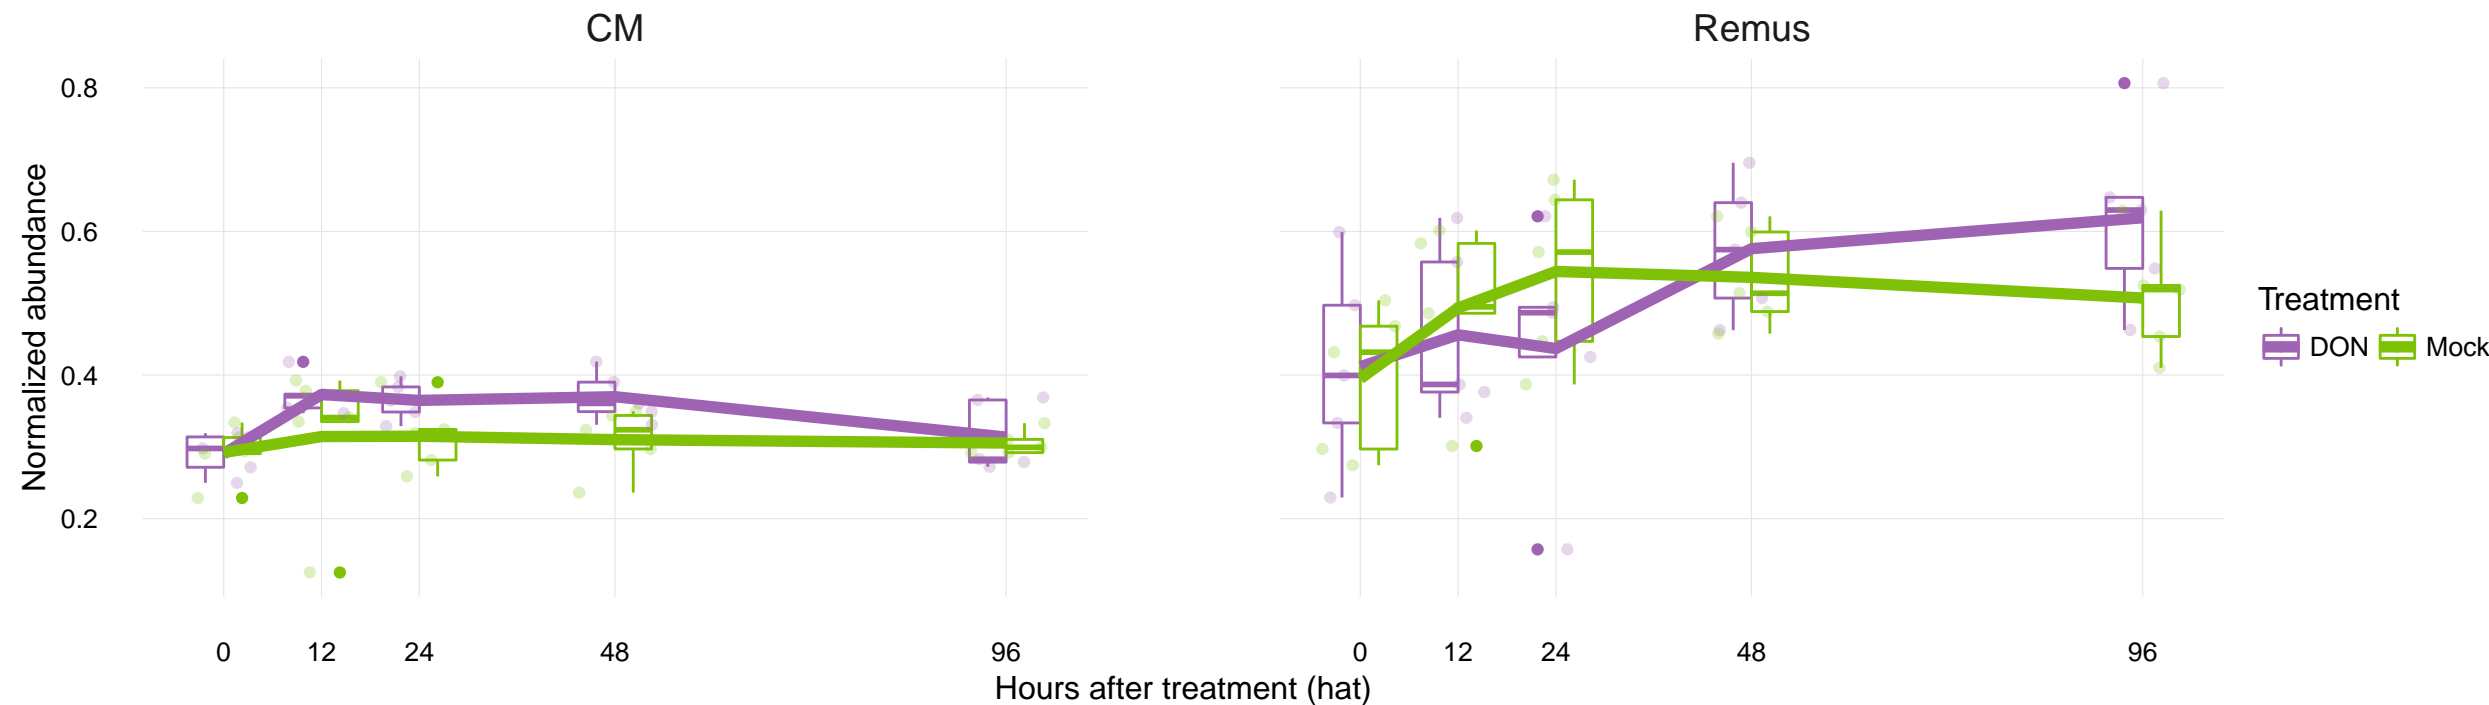

## DON, Mock; all four genotypes

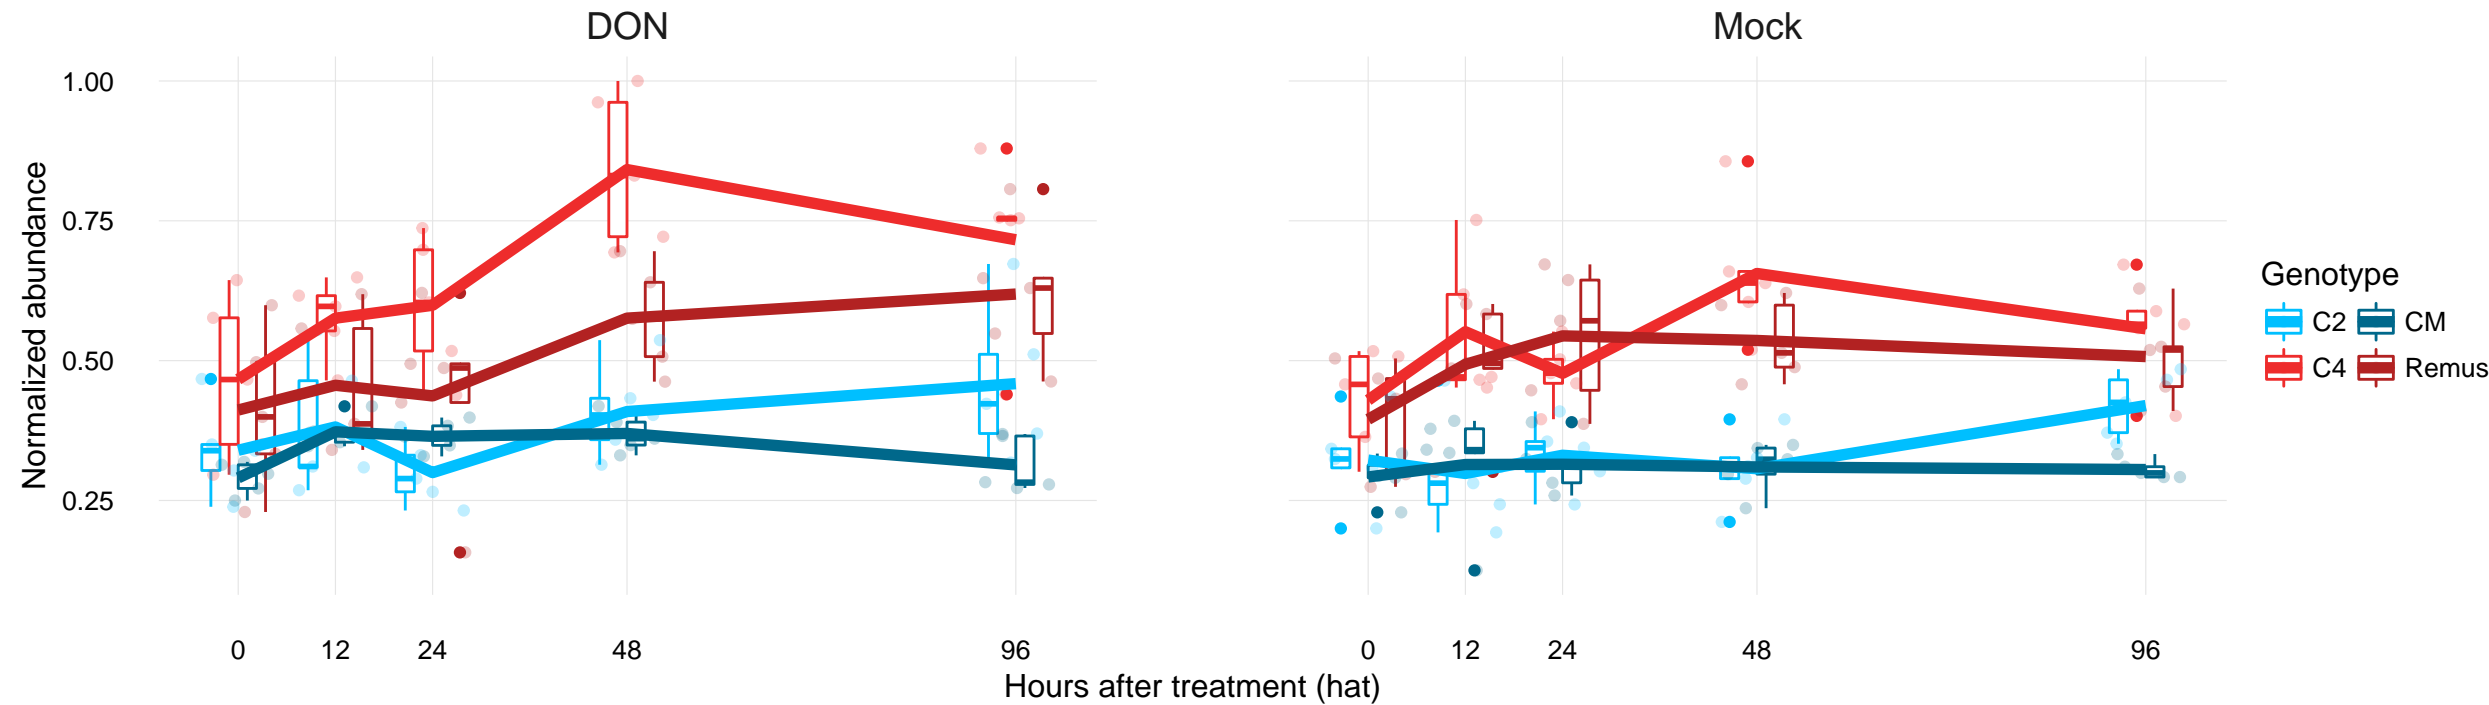



# A.137

Annotated as Flavonoid or HCA derivative (GlcF)  
(2 database hits)

|                |                          |
|----------------|--------------------------|
| MZ             | 527.1548                 |
| RT             | 22.01 min                |
| Normalization  | Directly via KPX samples |
| Cluster        | –                        |
| Cn total / Phe | 27 / 9                   |

## C2, C4; different treatments

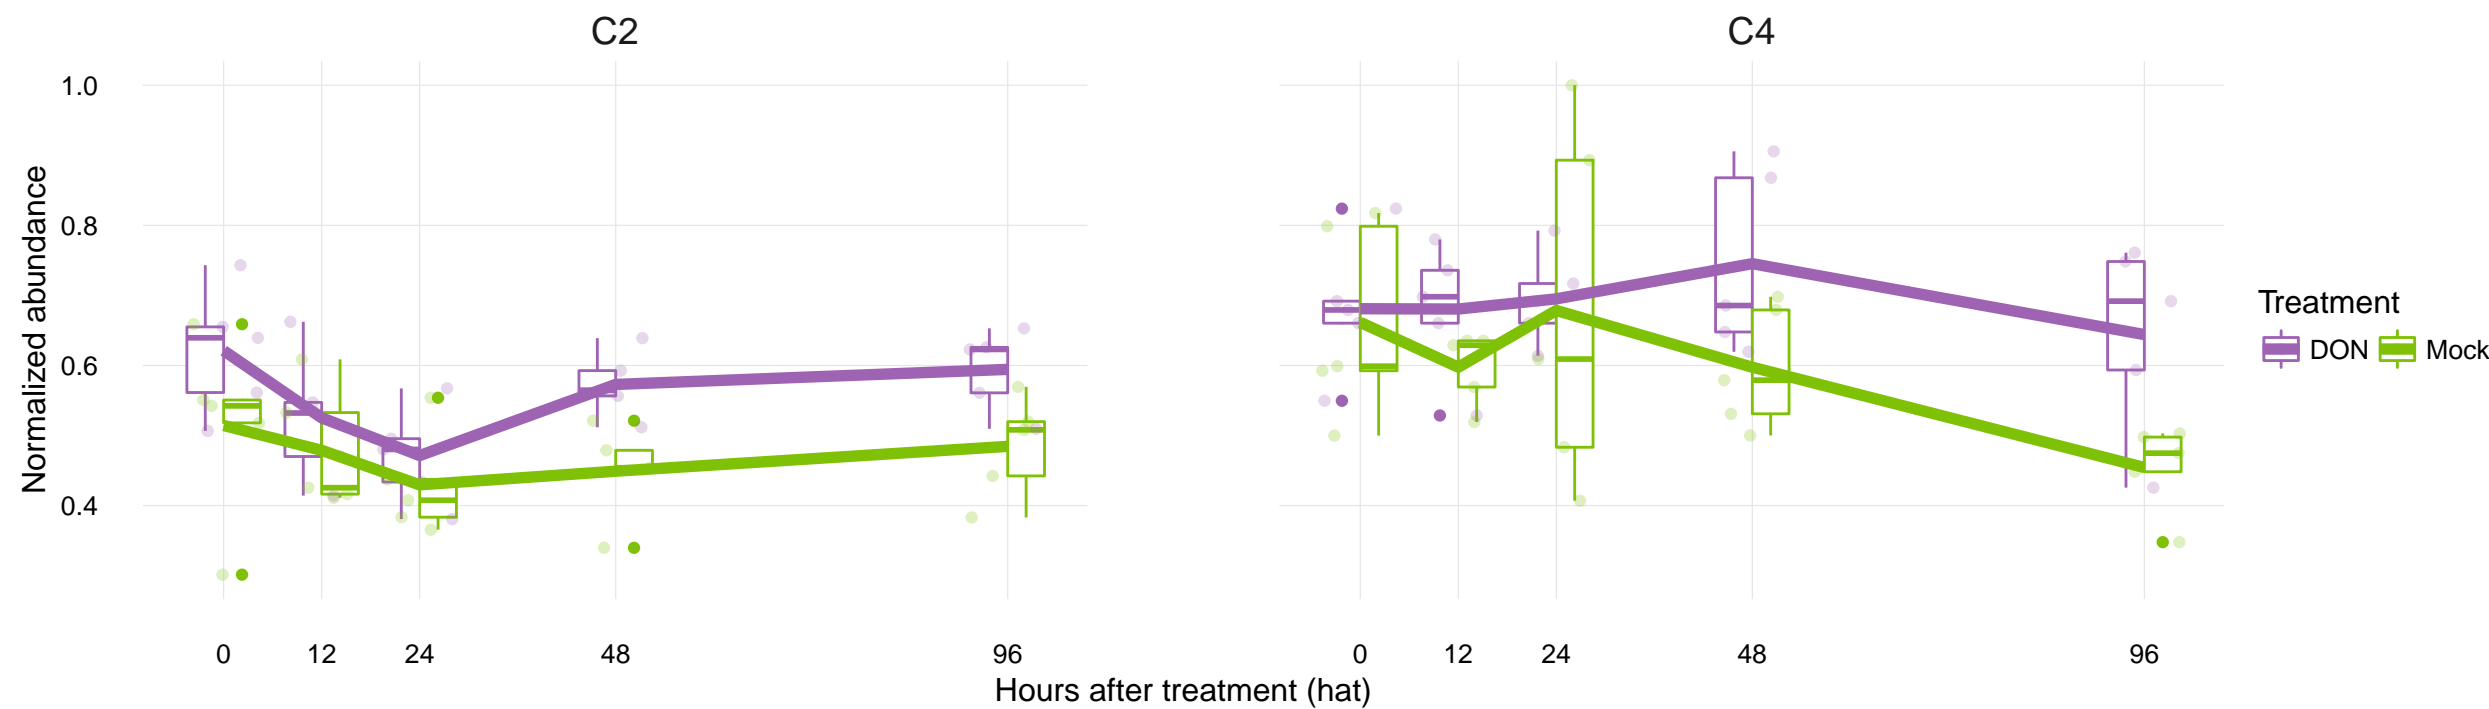

## DON, Mock; different genotypes

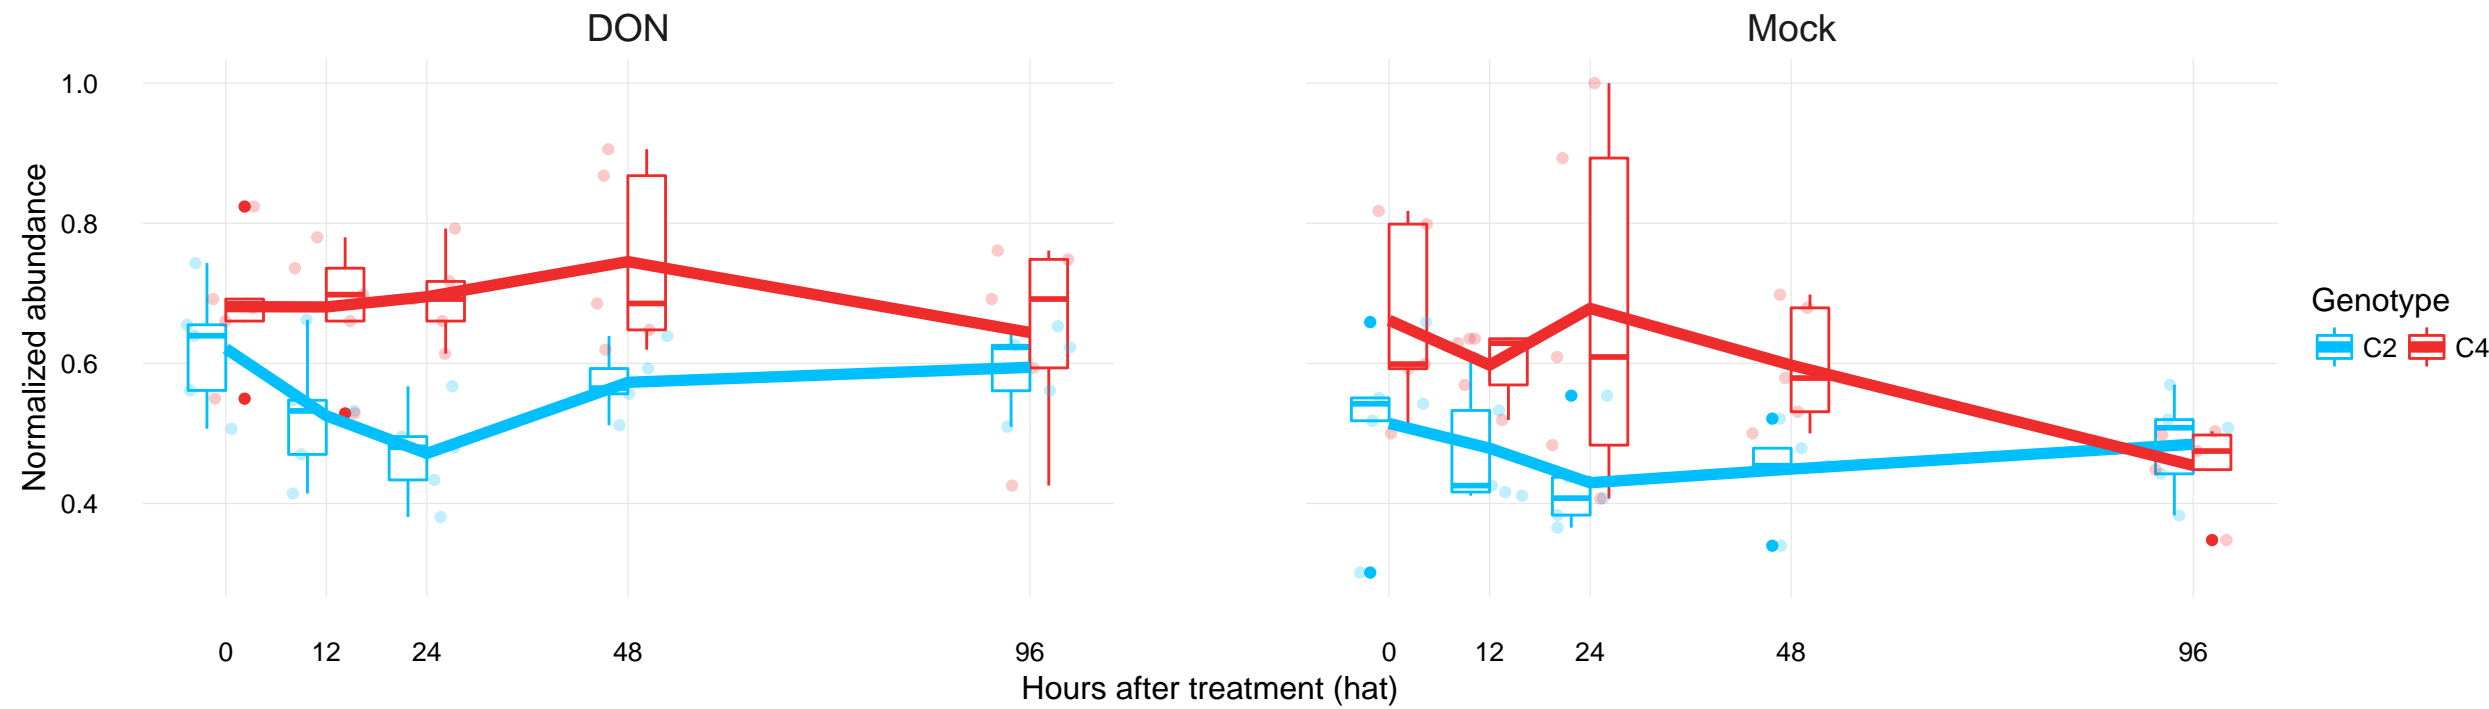

## CM, Remus; different treatments

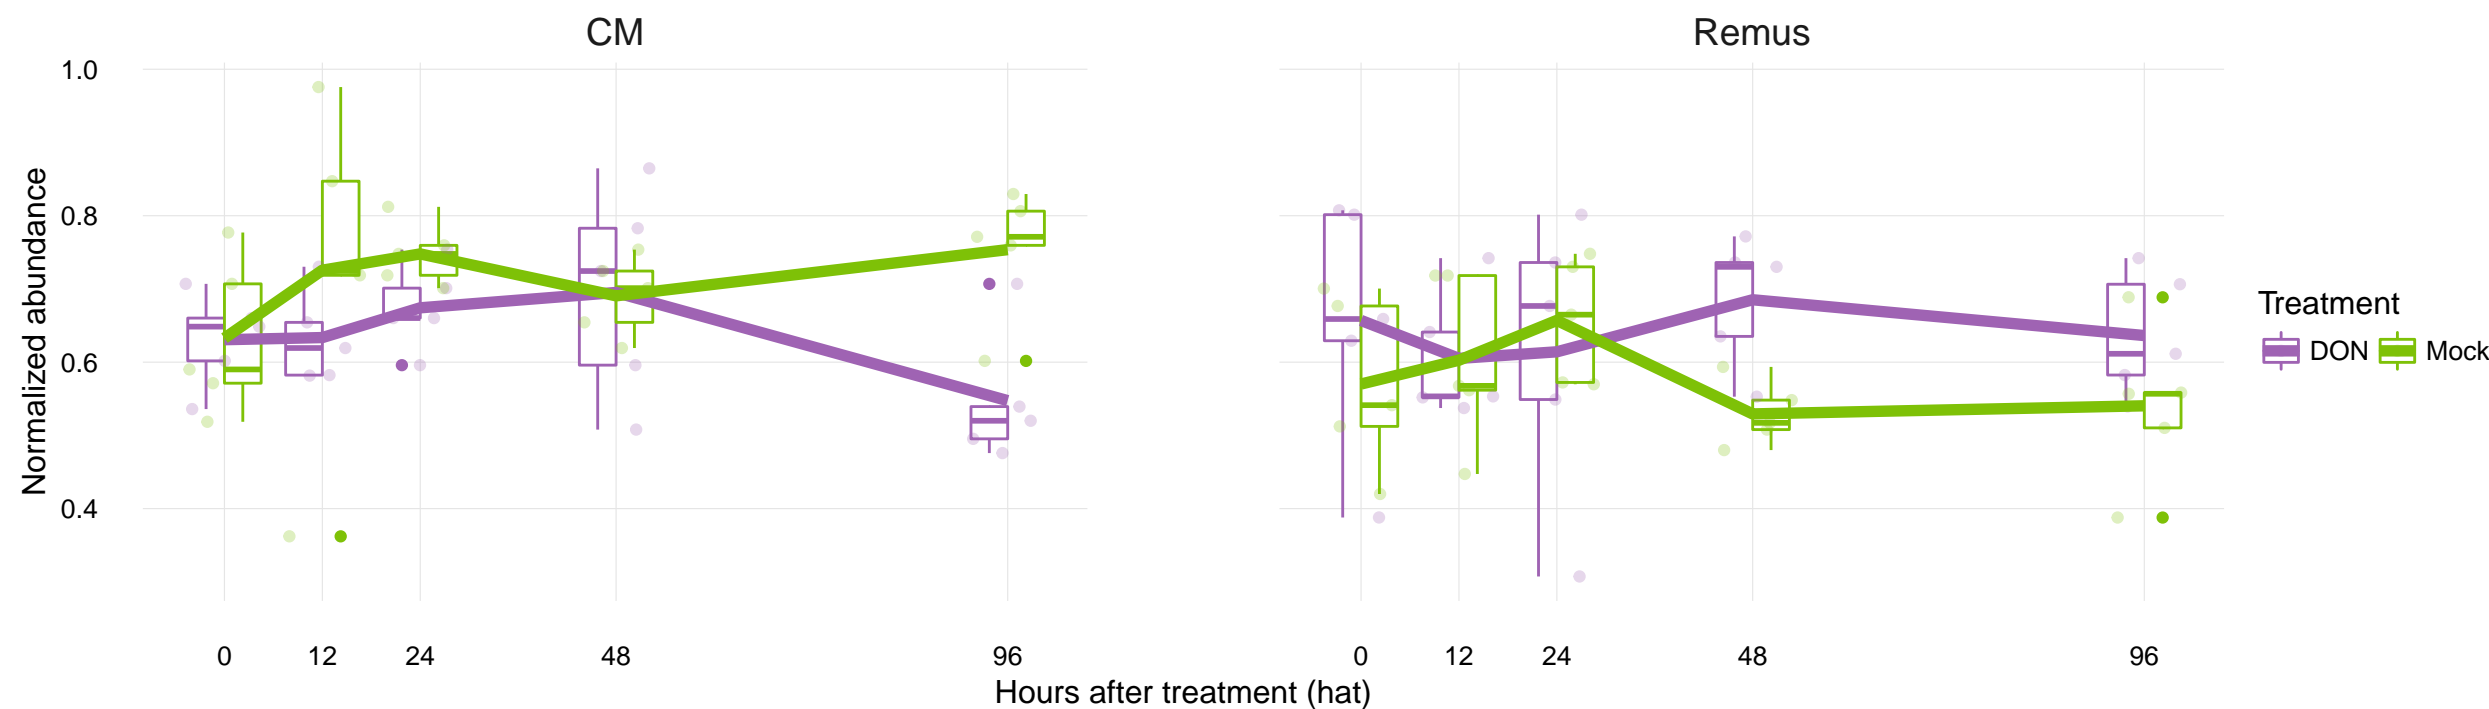

## DON, Mock; all four genotypes

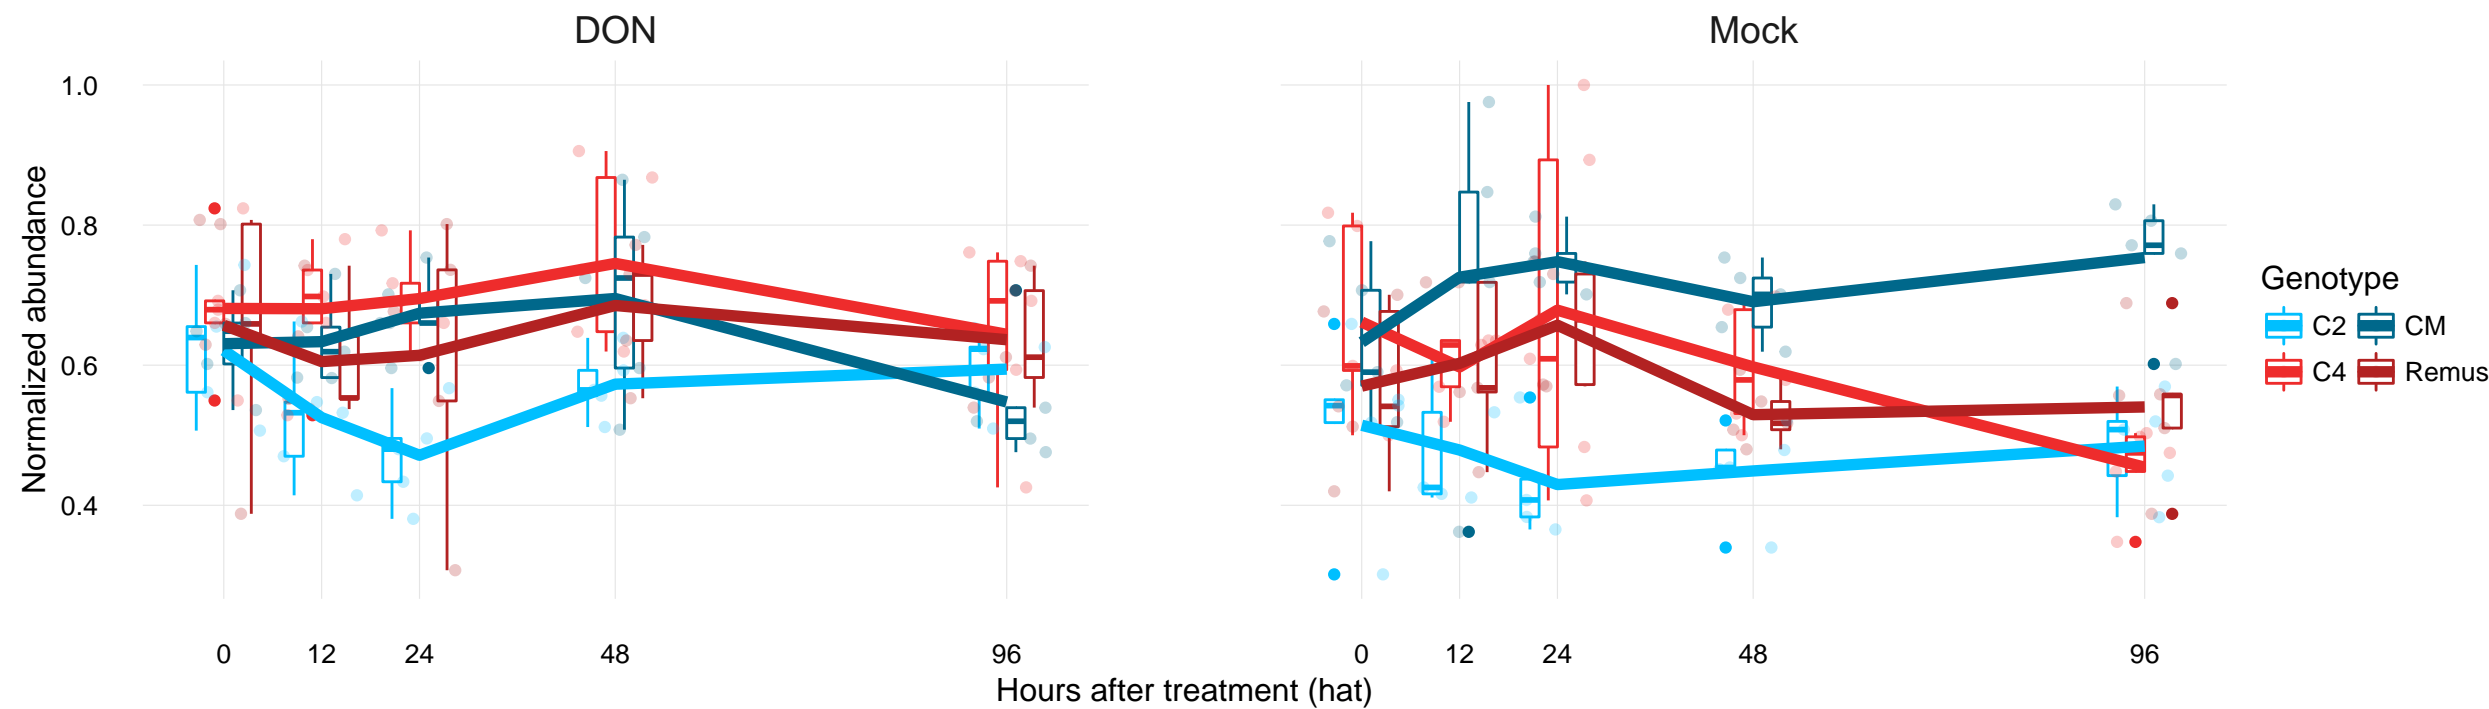



# A.133

Annotated as Flavonoid or HCA derivative (GlcF)  
(2 database hits)

|                |                          |
|----------------|--------------------------|
| MZ             | 527.1548                 |
| RT             | 21.45 min                |
| Normalization  | Directly via KPX samples |
| Cluster        | –                        |
| Cn total / Phe | 27 / 9                   |

## C2, C4; different treatments

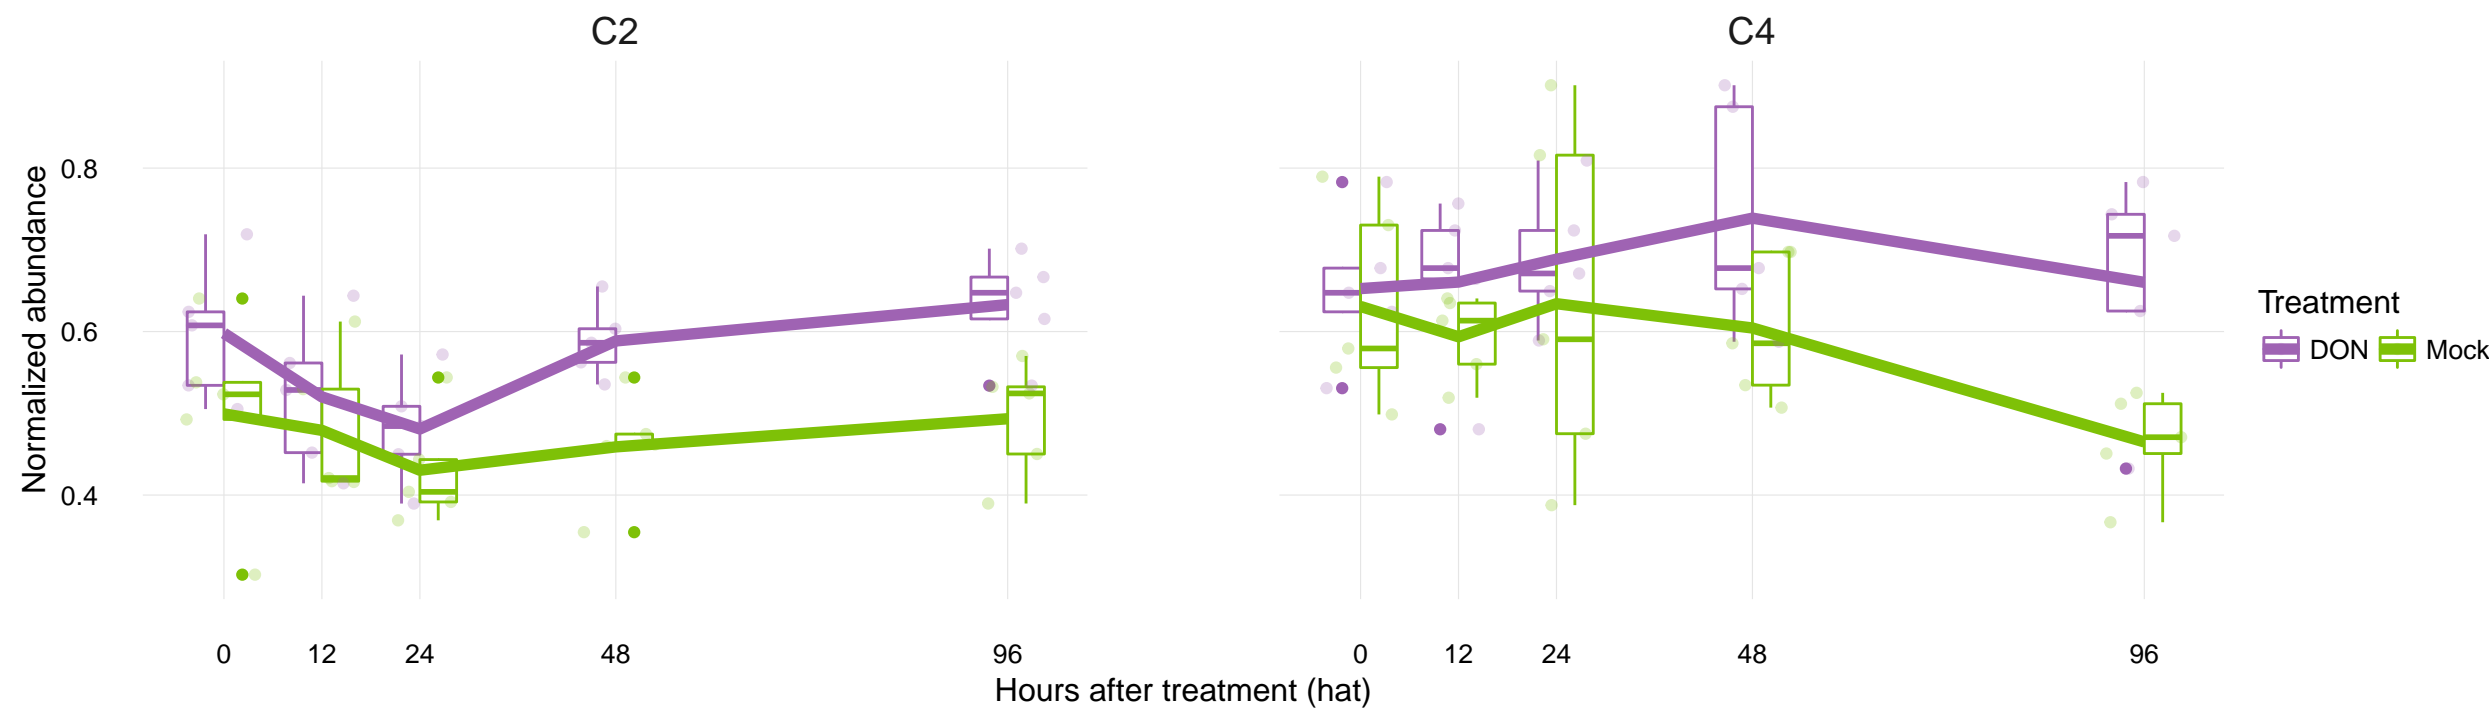

## DON, Mock; different genotypes

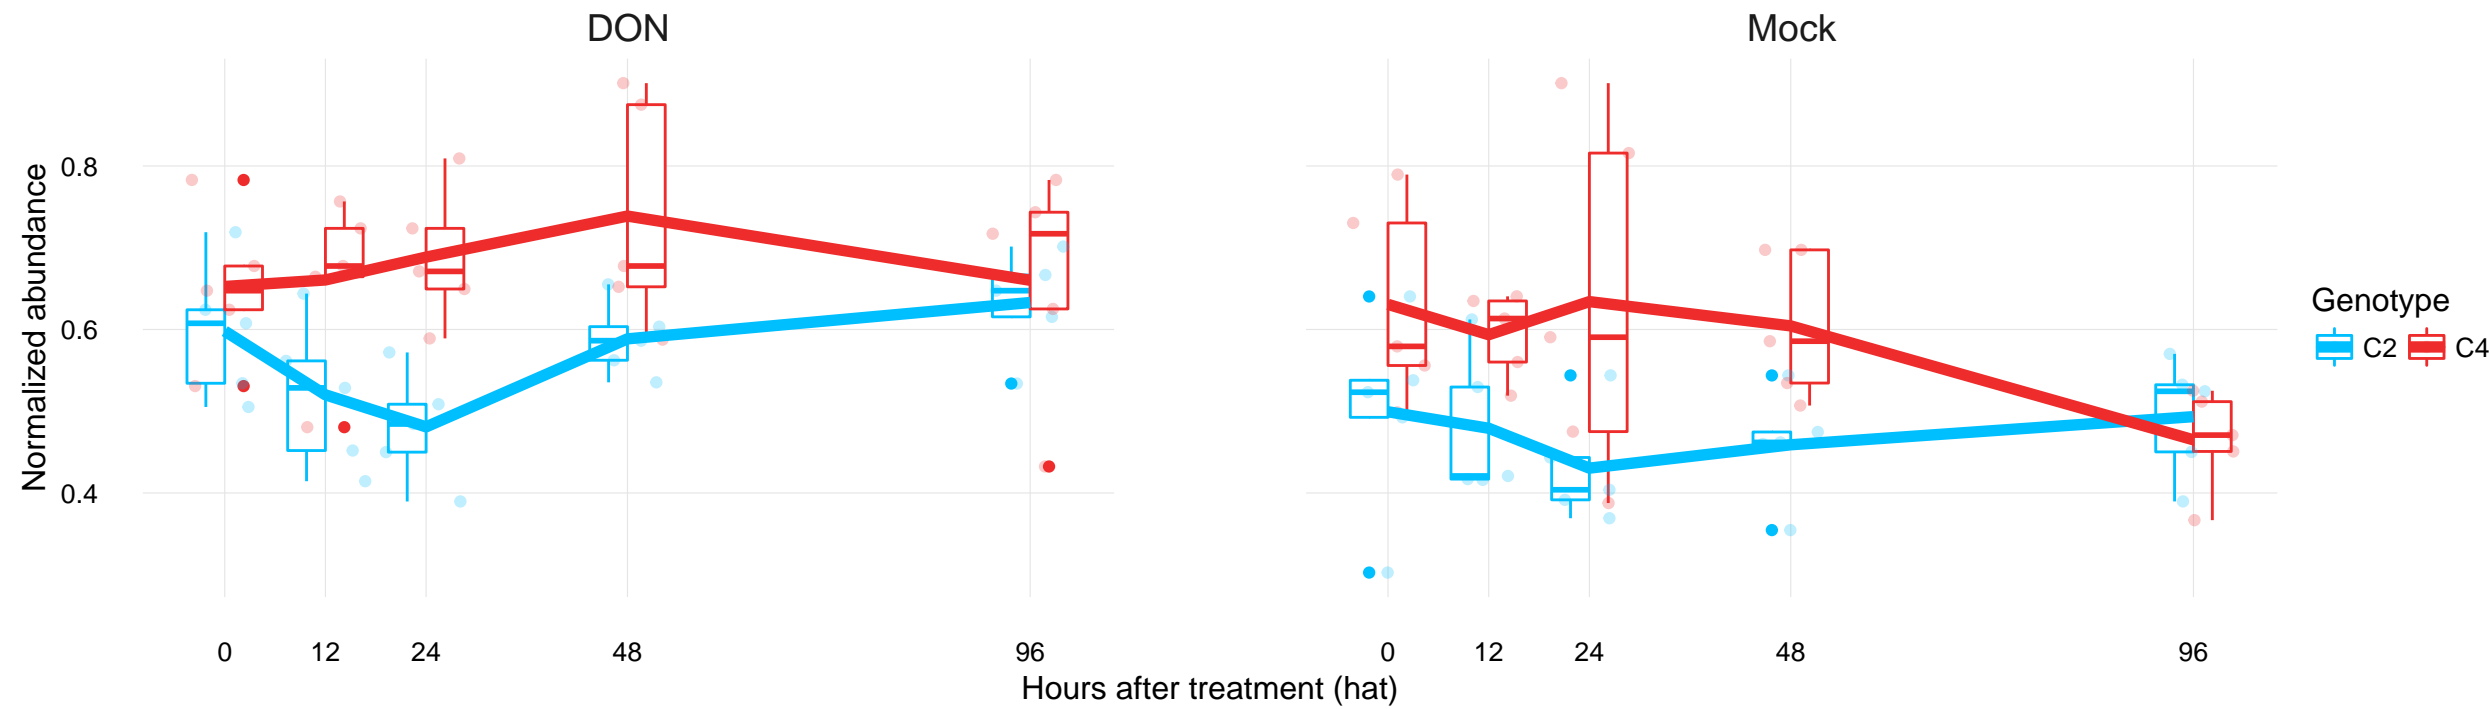

## CM, Remus; different treatments

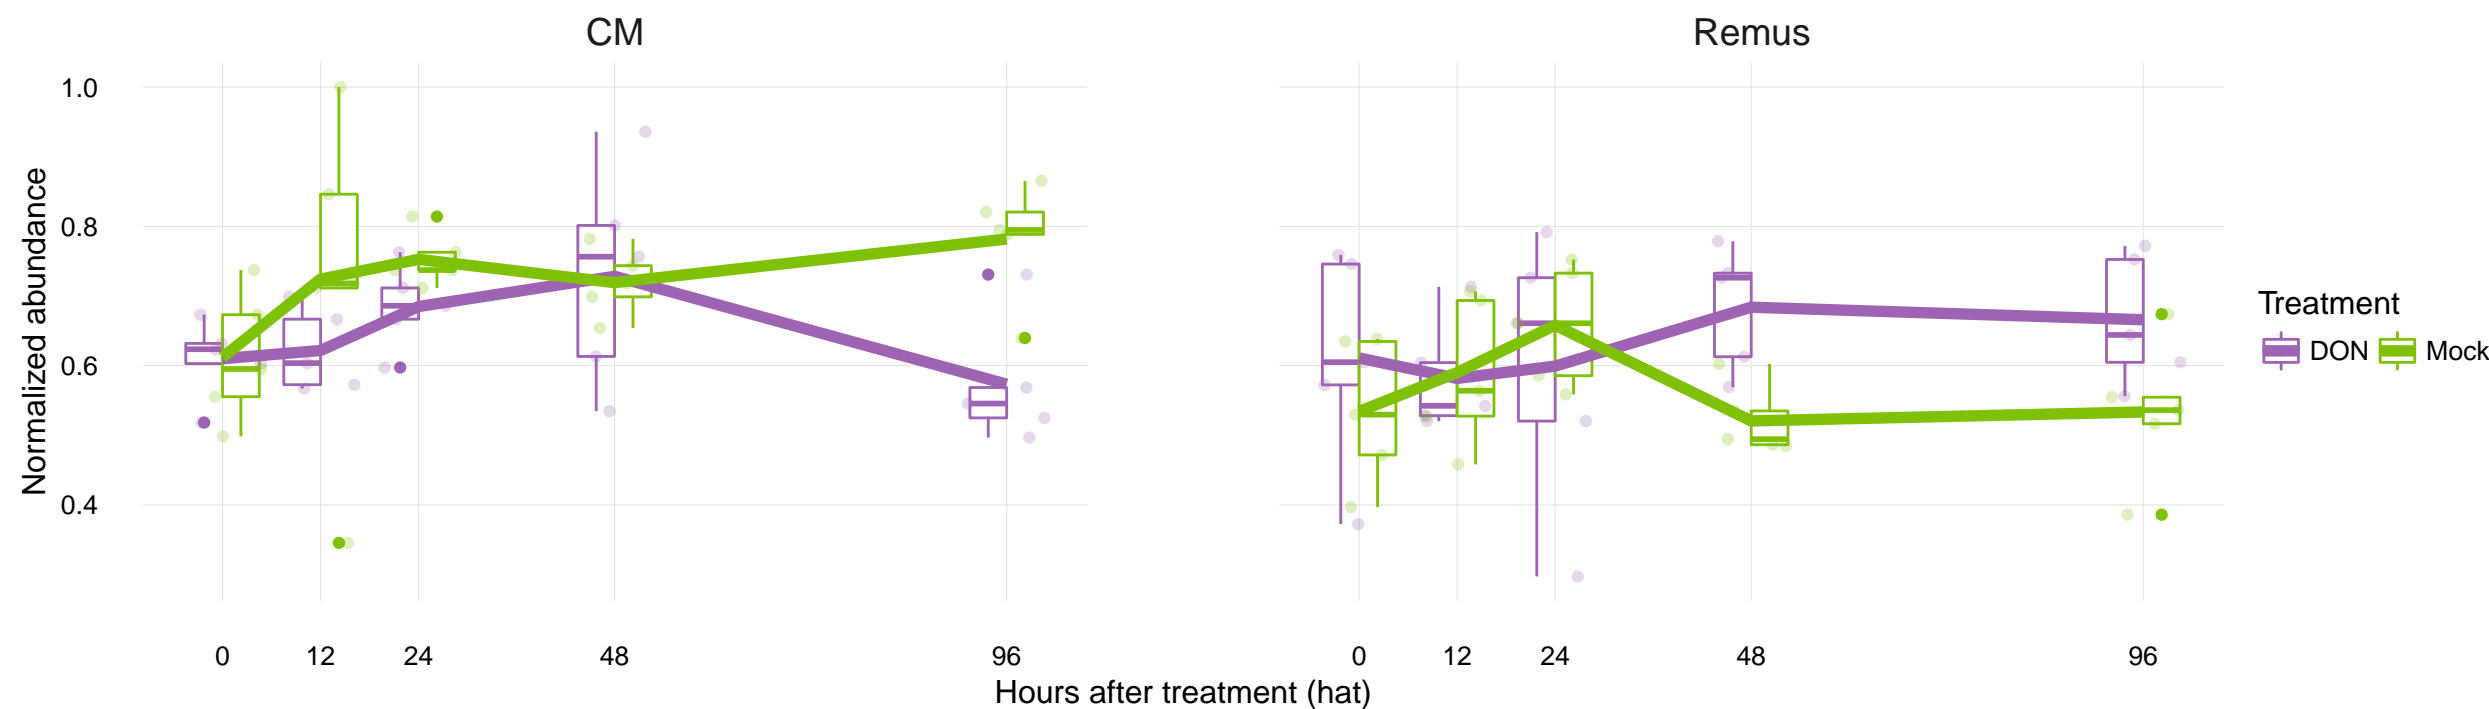

## DON, Mock; all four genotypes

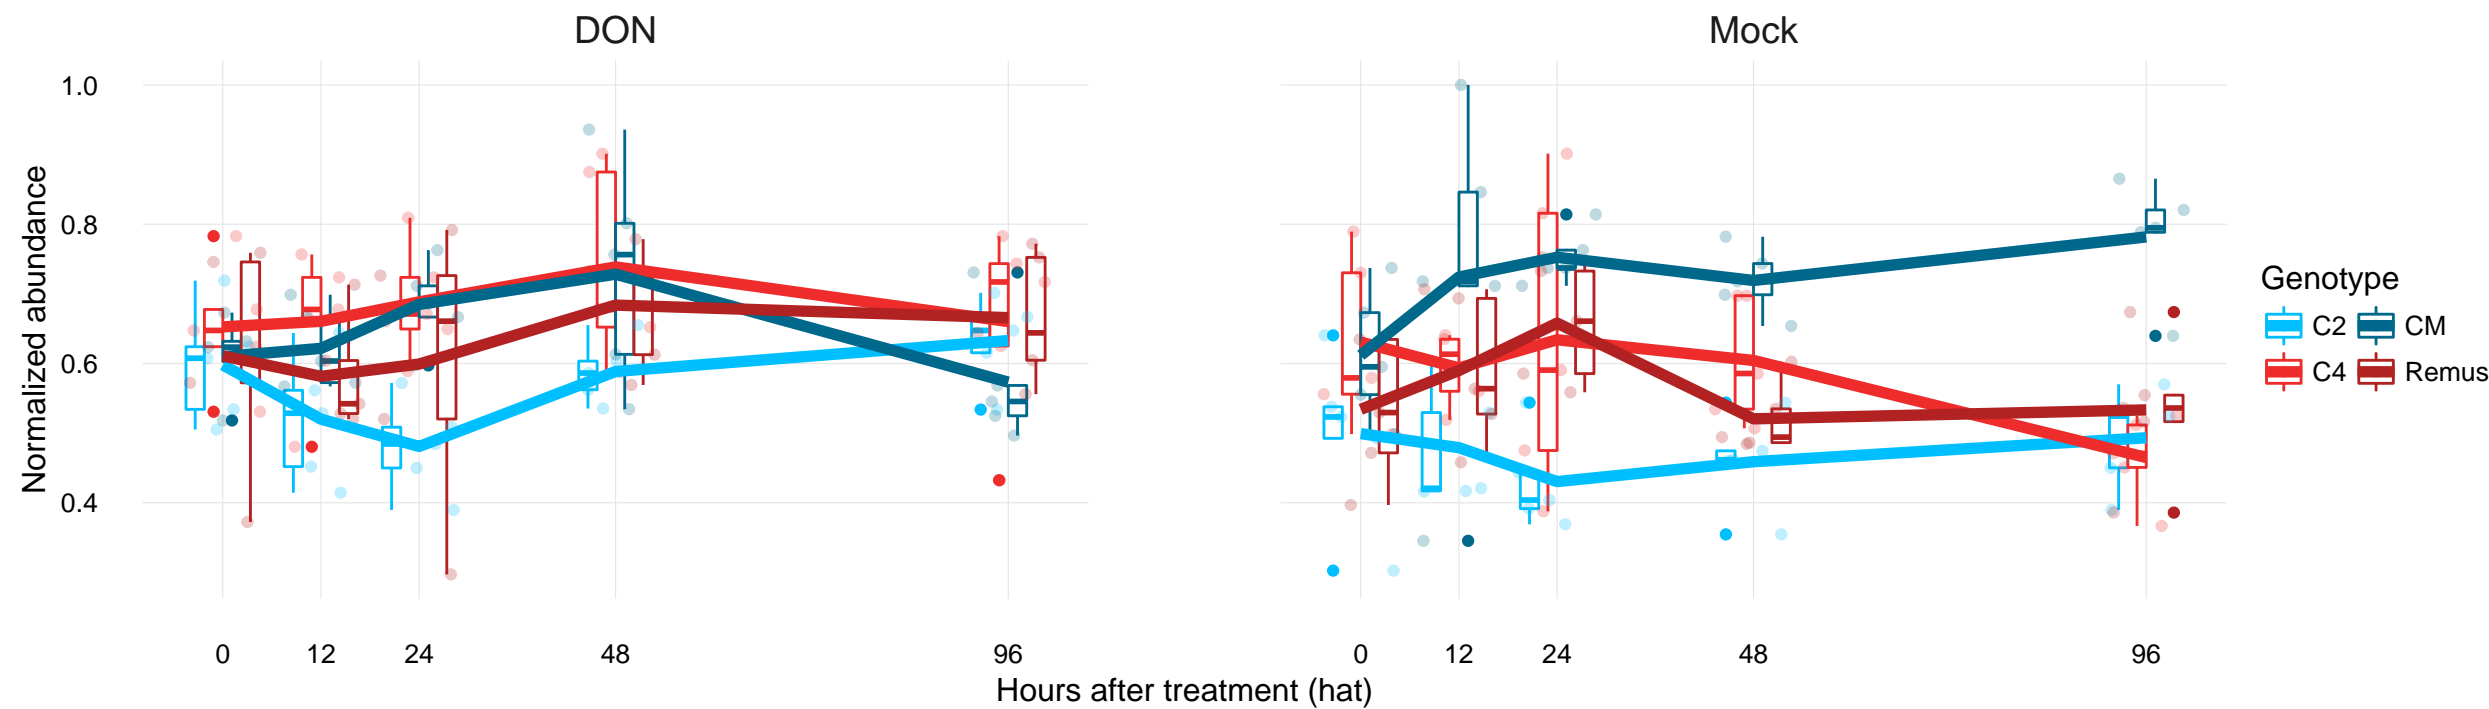

# A.130

Annotated as Flavonoid (diF)  
(1 database hit)

|                |                          |
|----------------|--------------------------|
| MZ             | 675.2072                 |
| RT             | 20.99 min                |
| Normalization  | Directly via KPX samples |
| Cluster        | –                        |
| Cn total / Phe | 36 /                     |

## C2, C4; different treatments

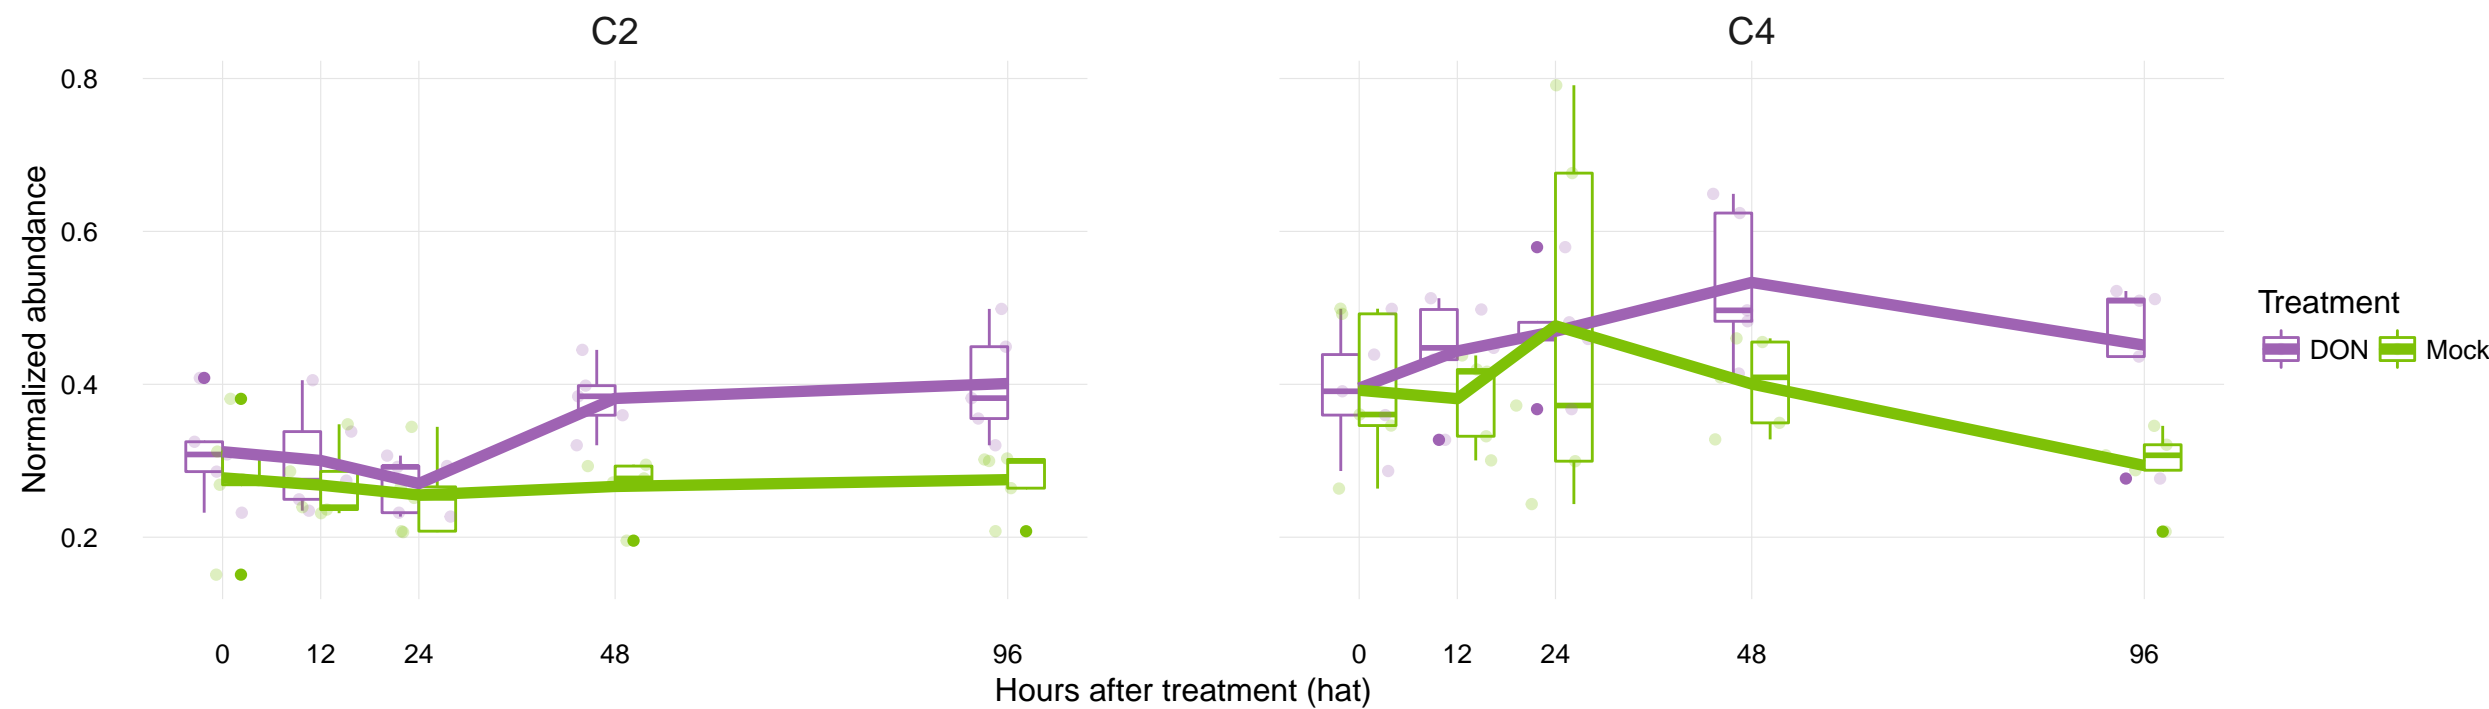

## DON, Mock; different genotypes

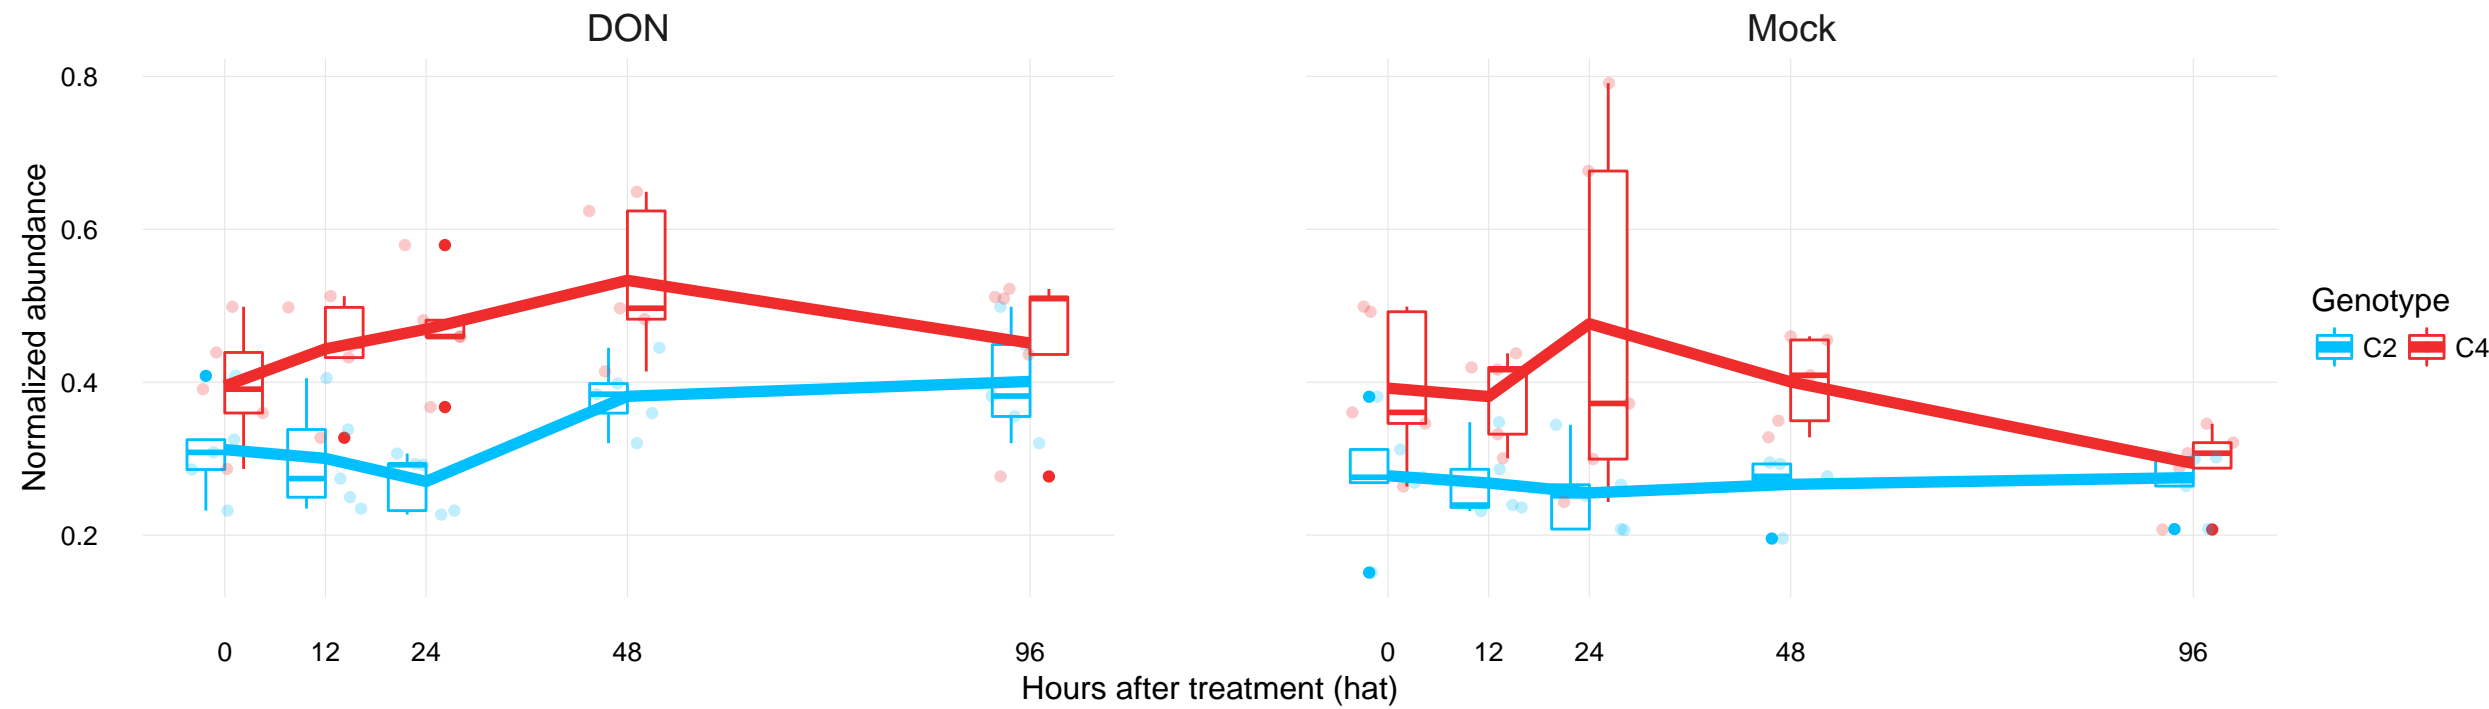

## CM, Remus; different treatments

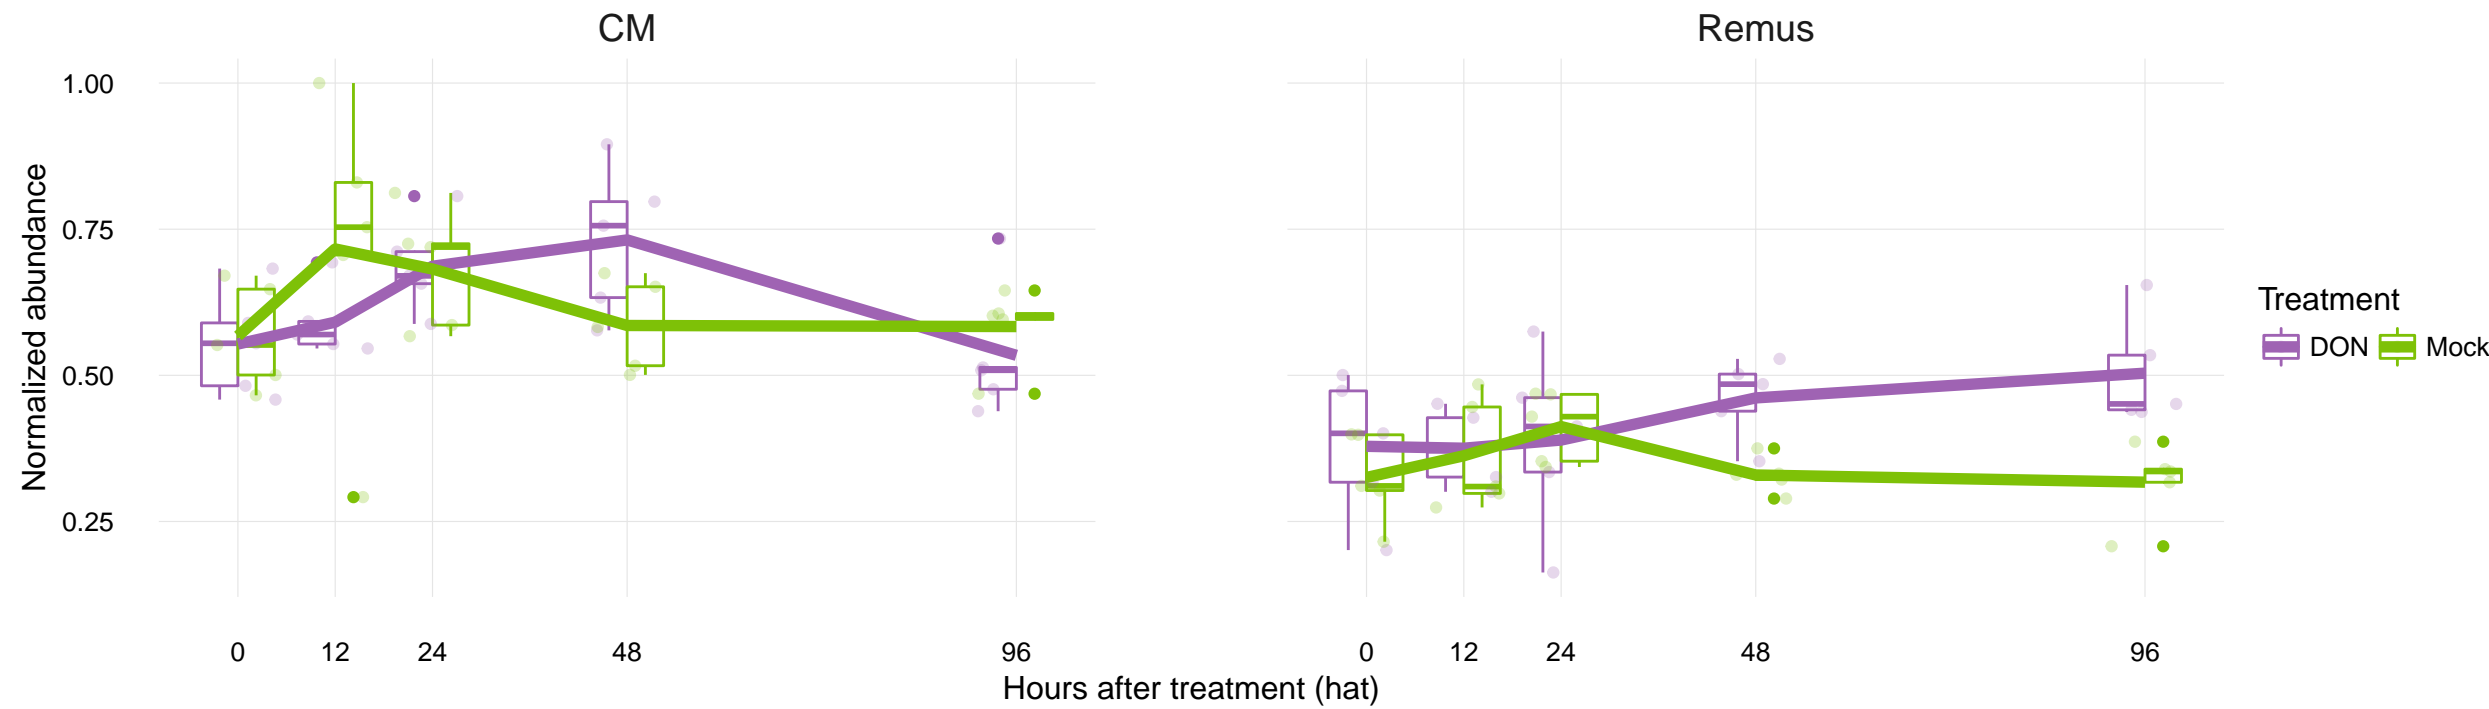

## DON, Mock; all four genotypes

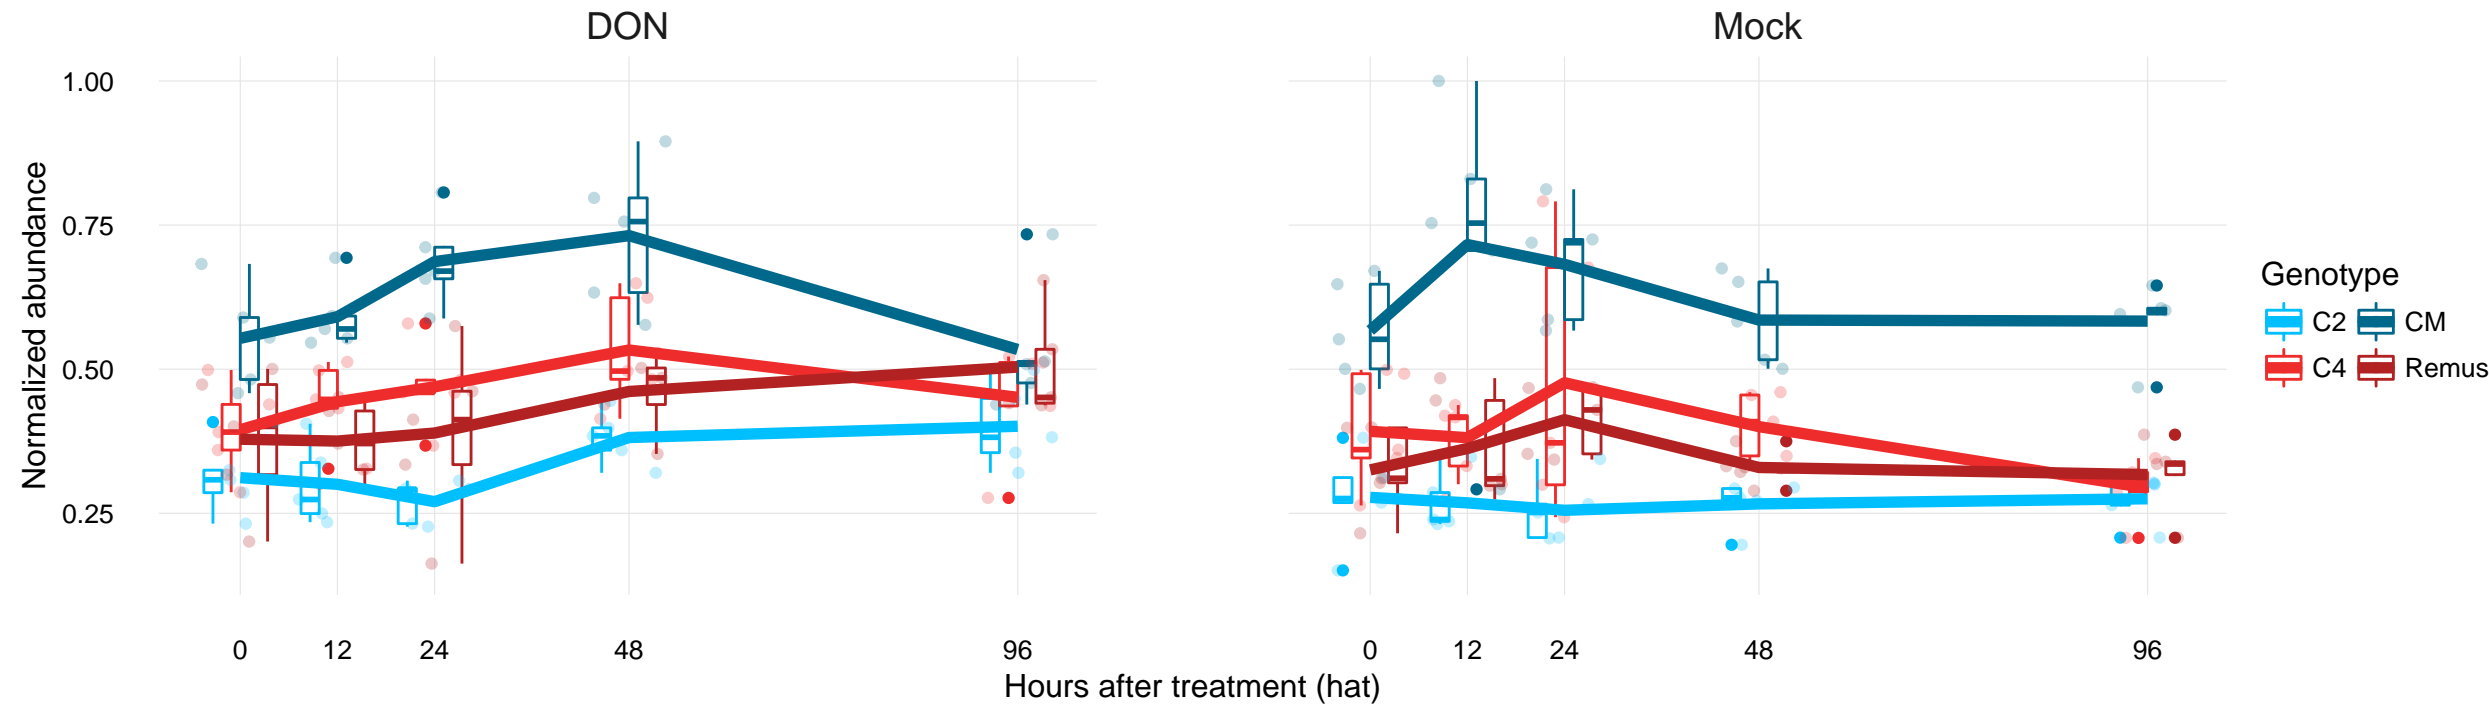

# U.15

Unknown Phe-derived wheat-metabolite

|                |                          |
|----------------|--------------------------|
| MZ             | 331.082                  |
| RT             | 21.72 min                |
| Normalization  | Directly via KPX samples |
| Cluster        | –                        |
| Cn total / Phe | 18 / 18                  |

## C2, C4; different treatments

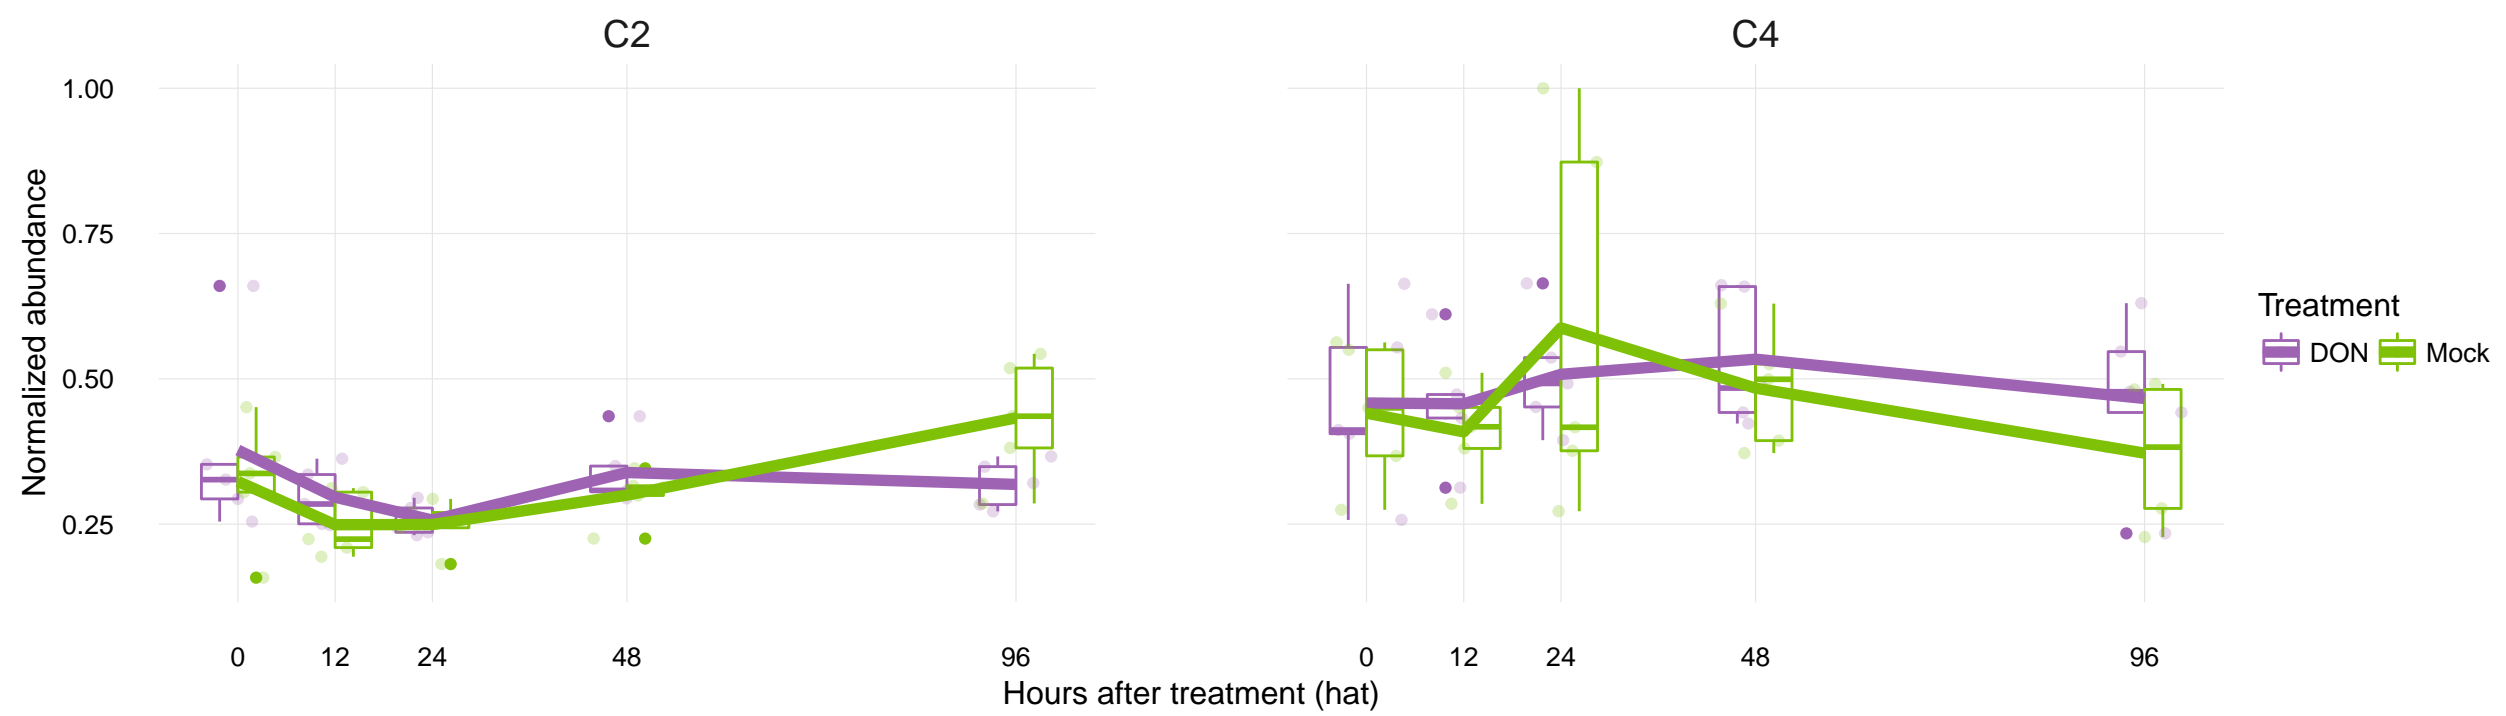

## DON, Mock; different genotypes

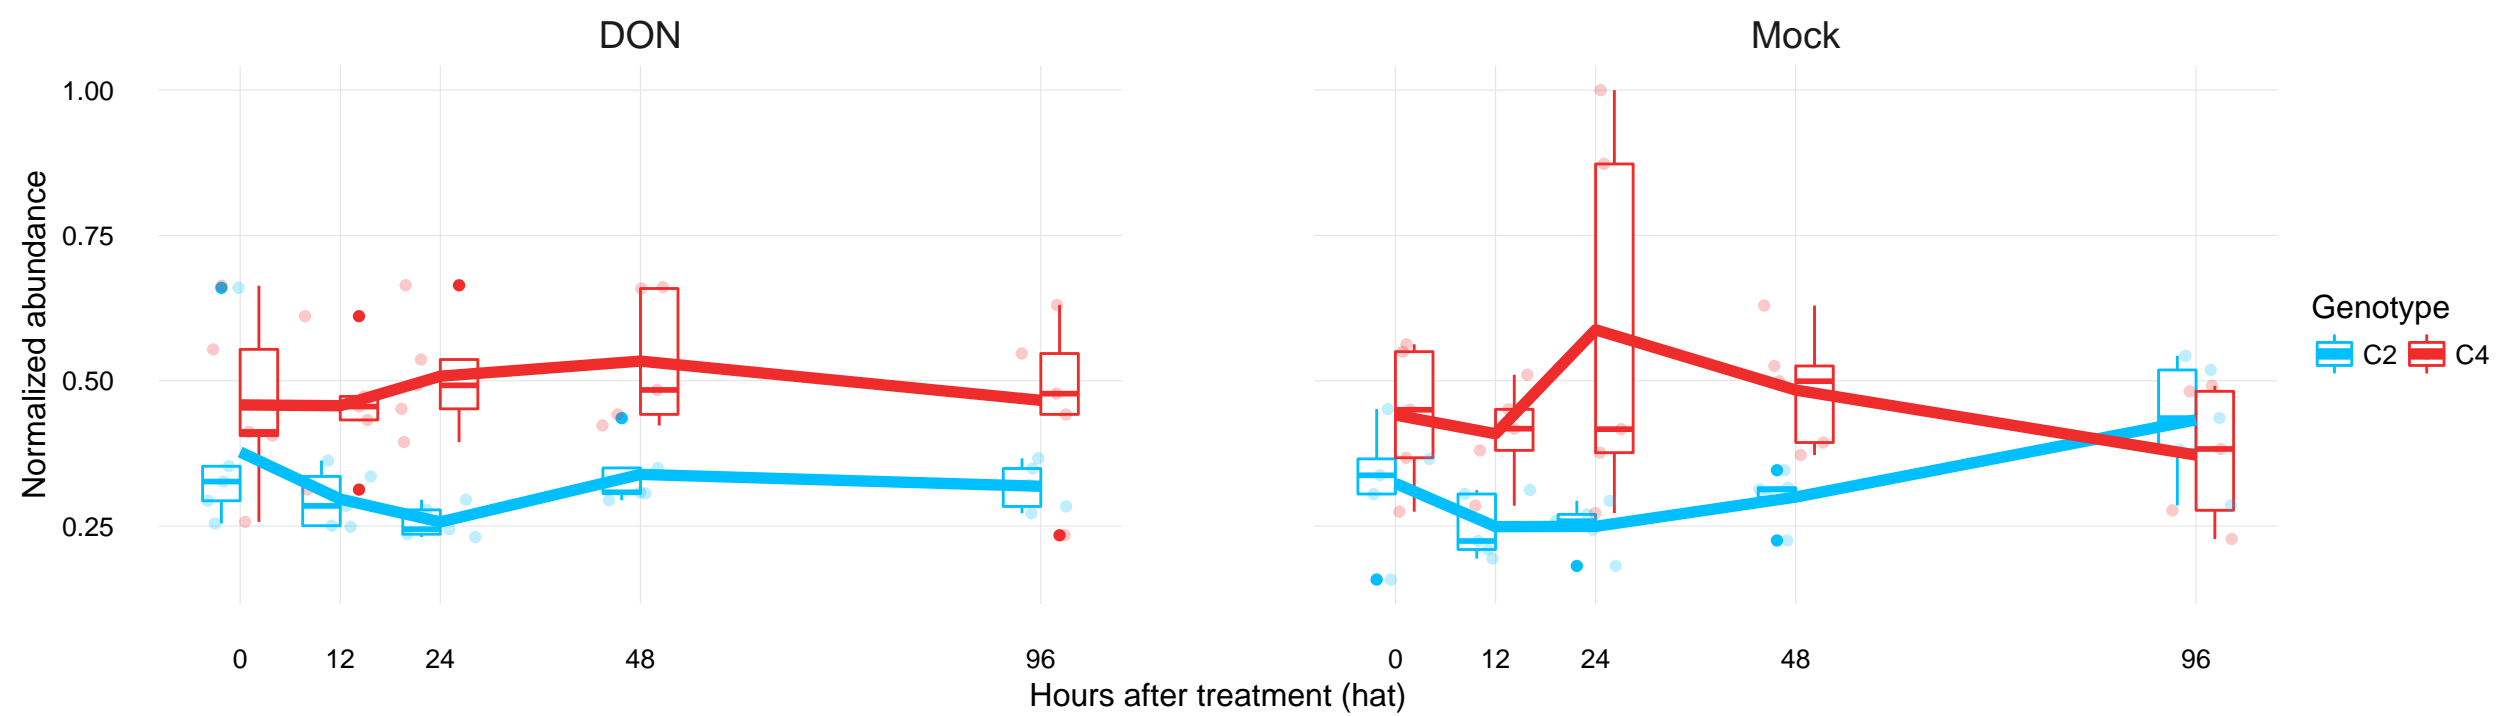

## CM, Remus; different treatments

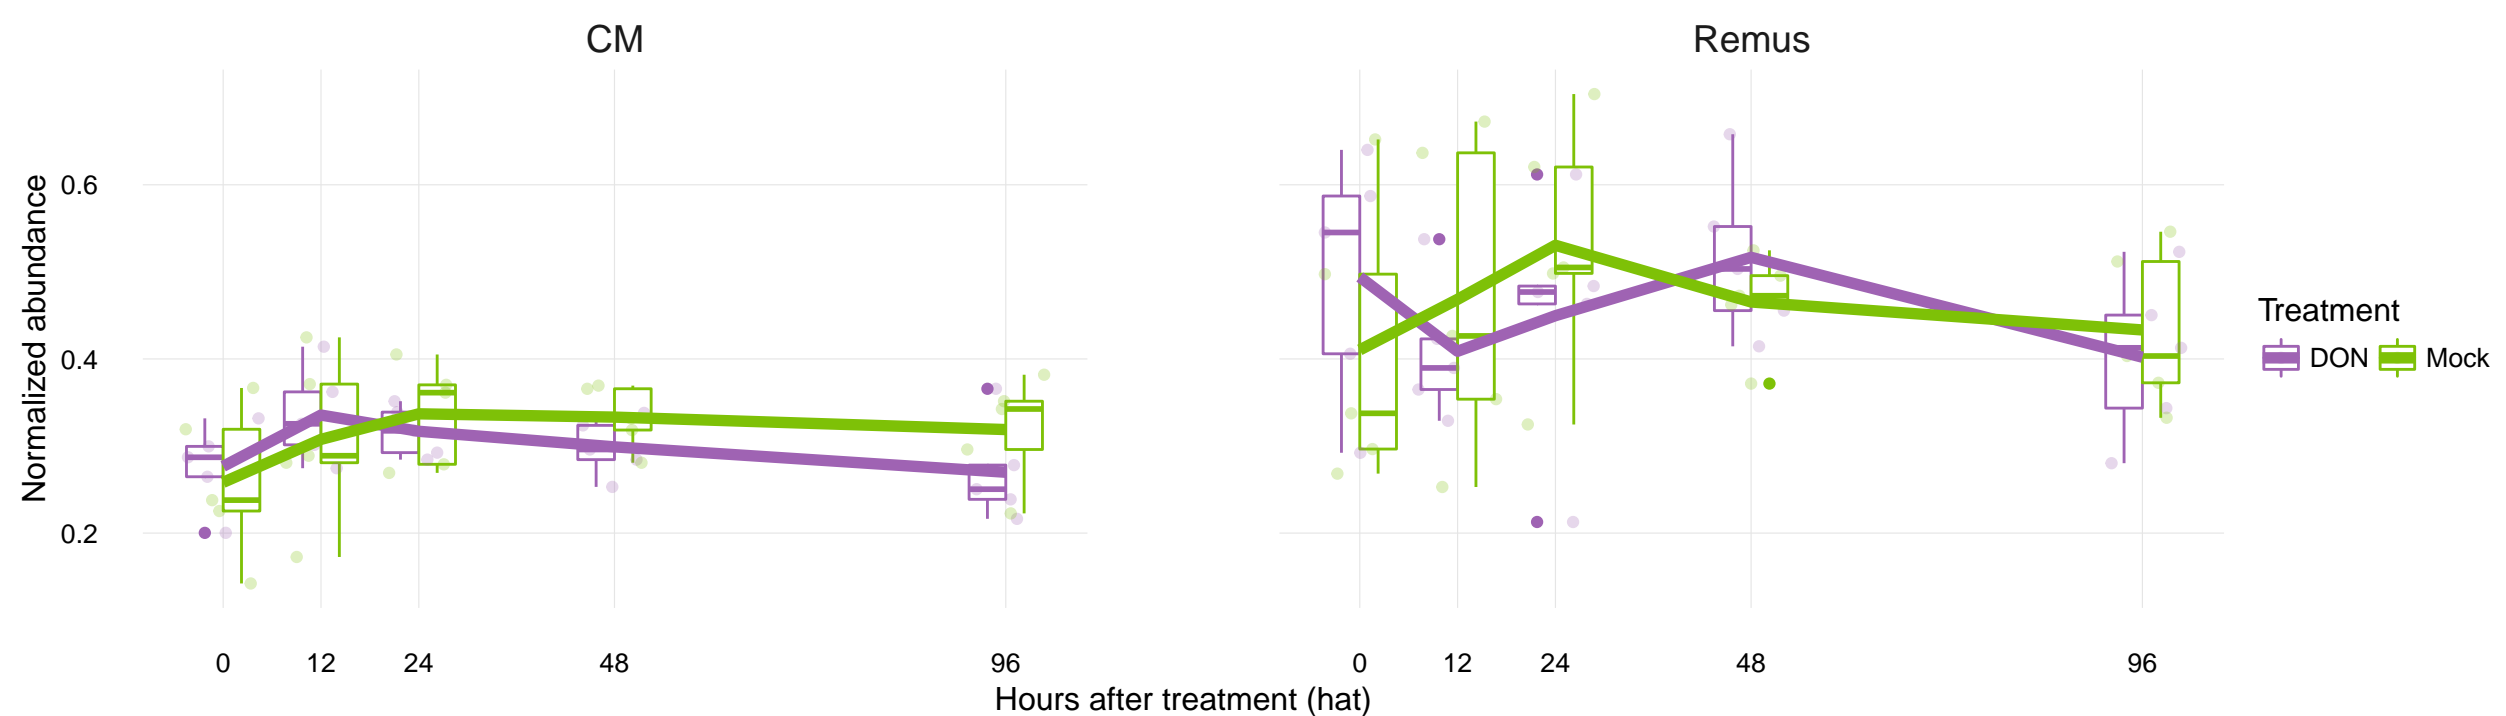

## DON, Mock; all four genotypes

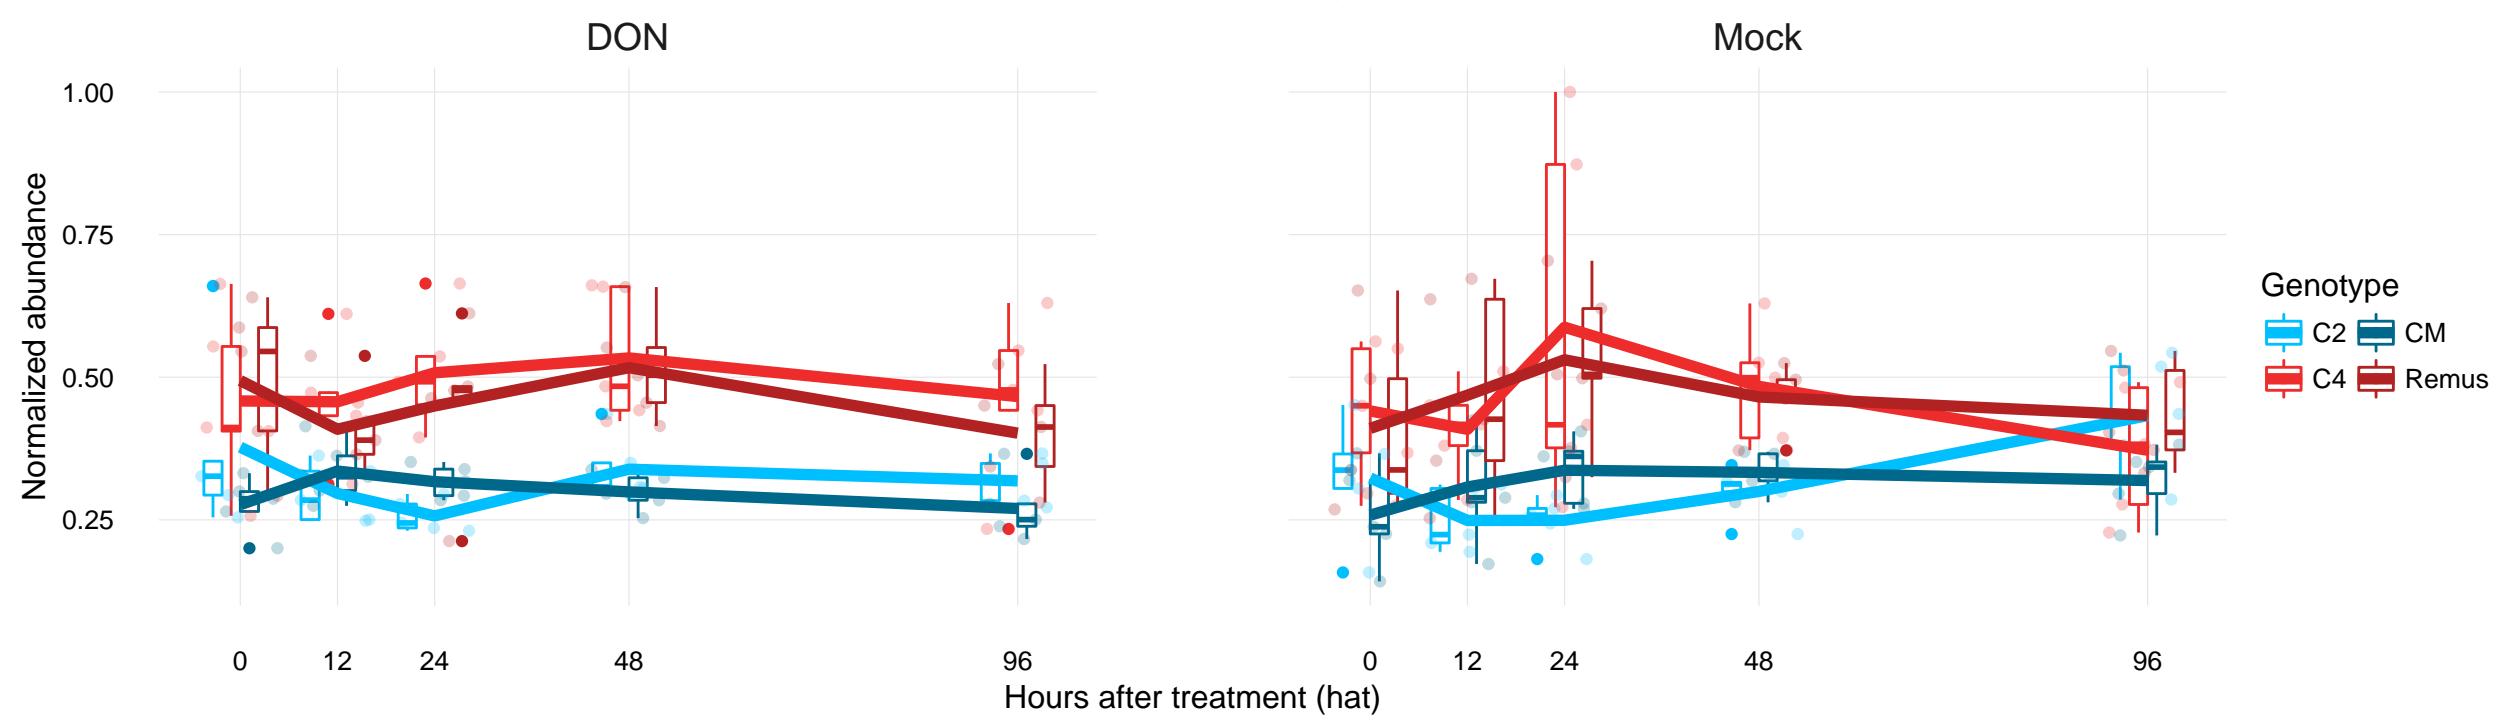

# A.136

Annotated as Flavonoid  
(74 database hits)

|                |                          |
|----------------|--------------------------|
| MZ             | 331.0814                 |
| RT             | 21.68 min                |
| Normalization  | Directly via KPX samples |
| Cluster        | –                        |
| Cn total / Phe | 17 / 9                   |

## C2, C4; different treatments

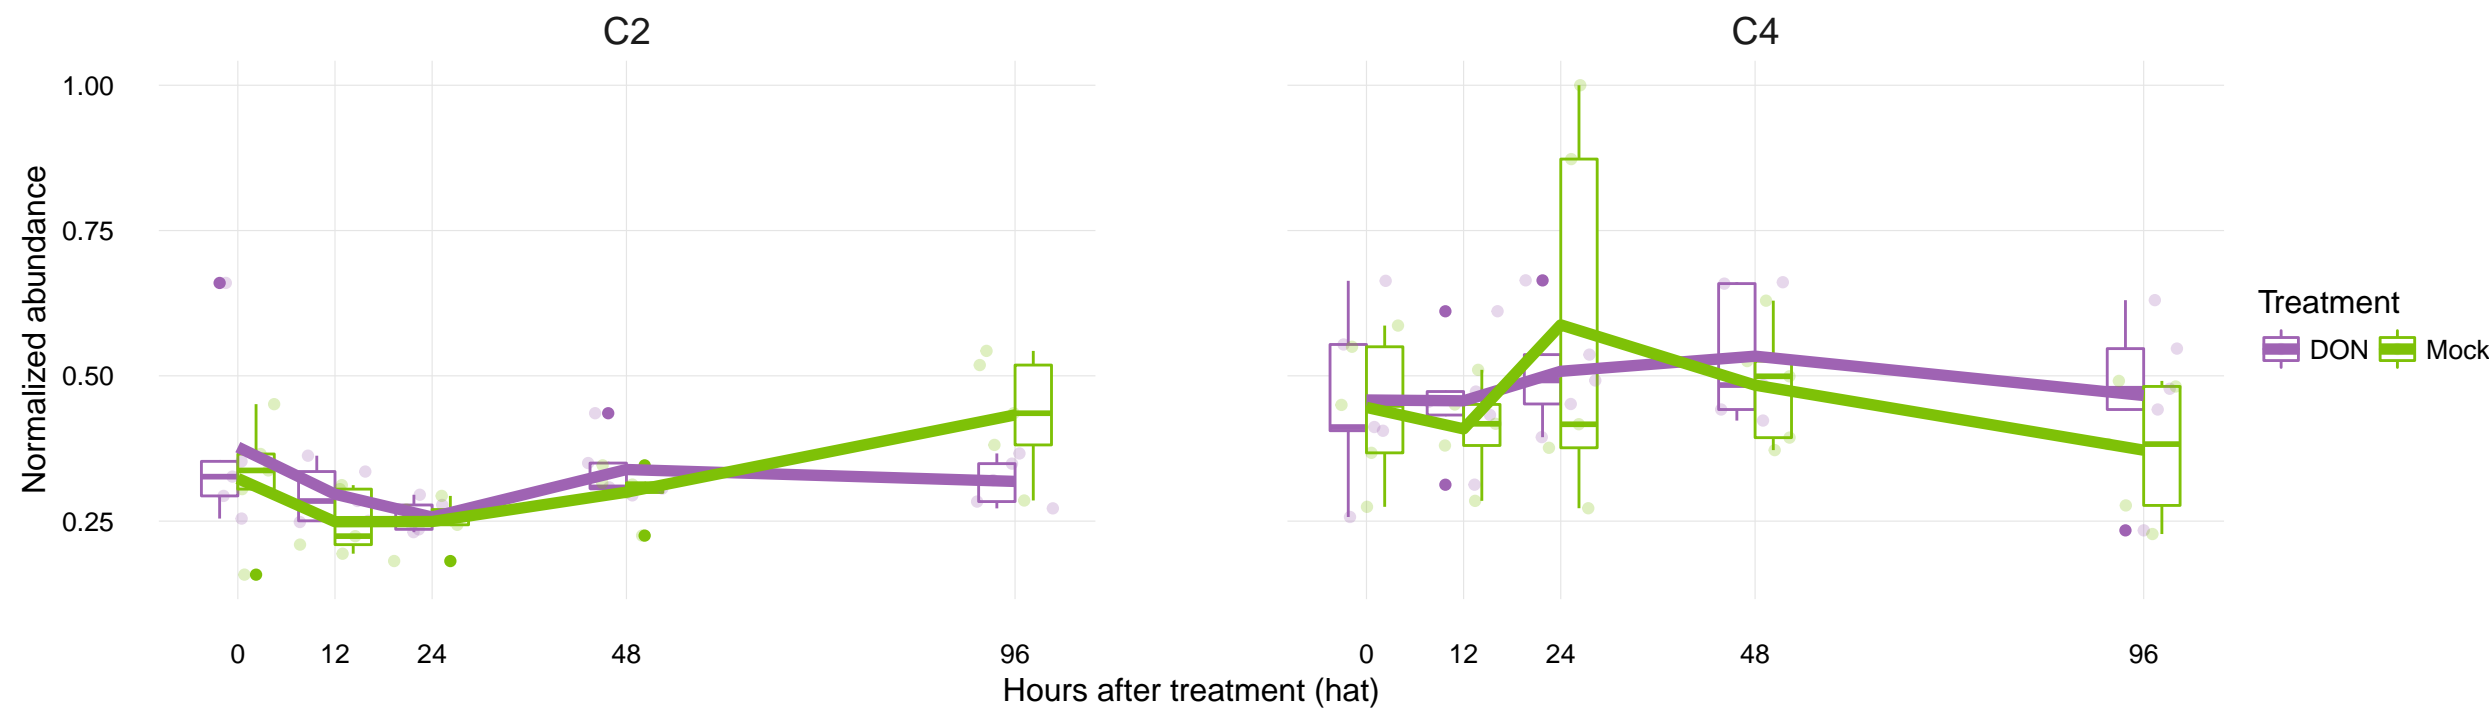

## DON, Mock; different genotypes

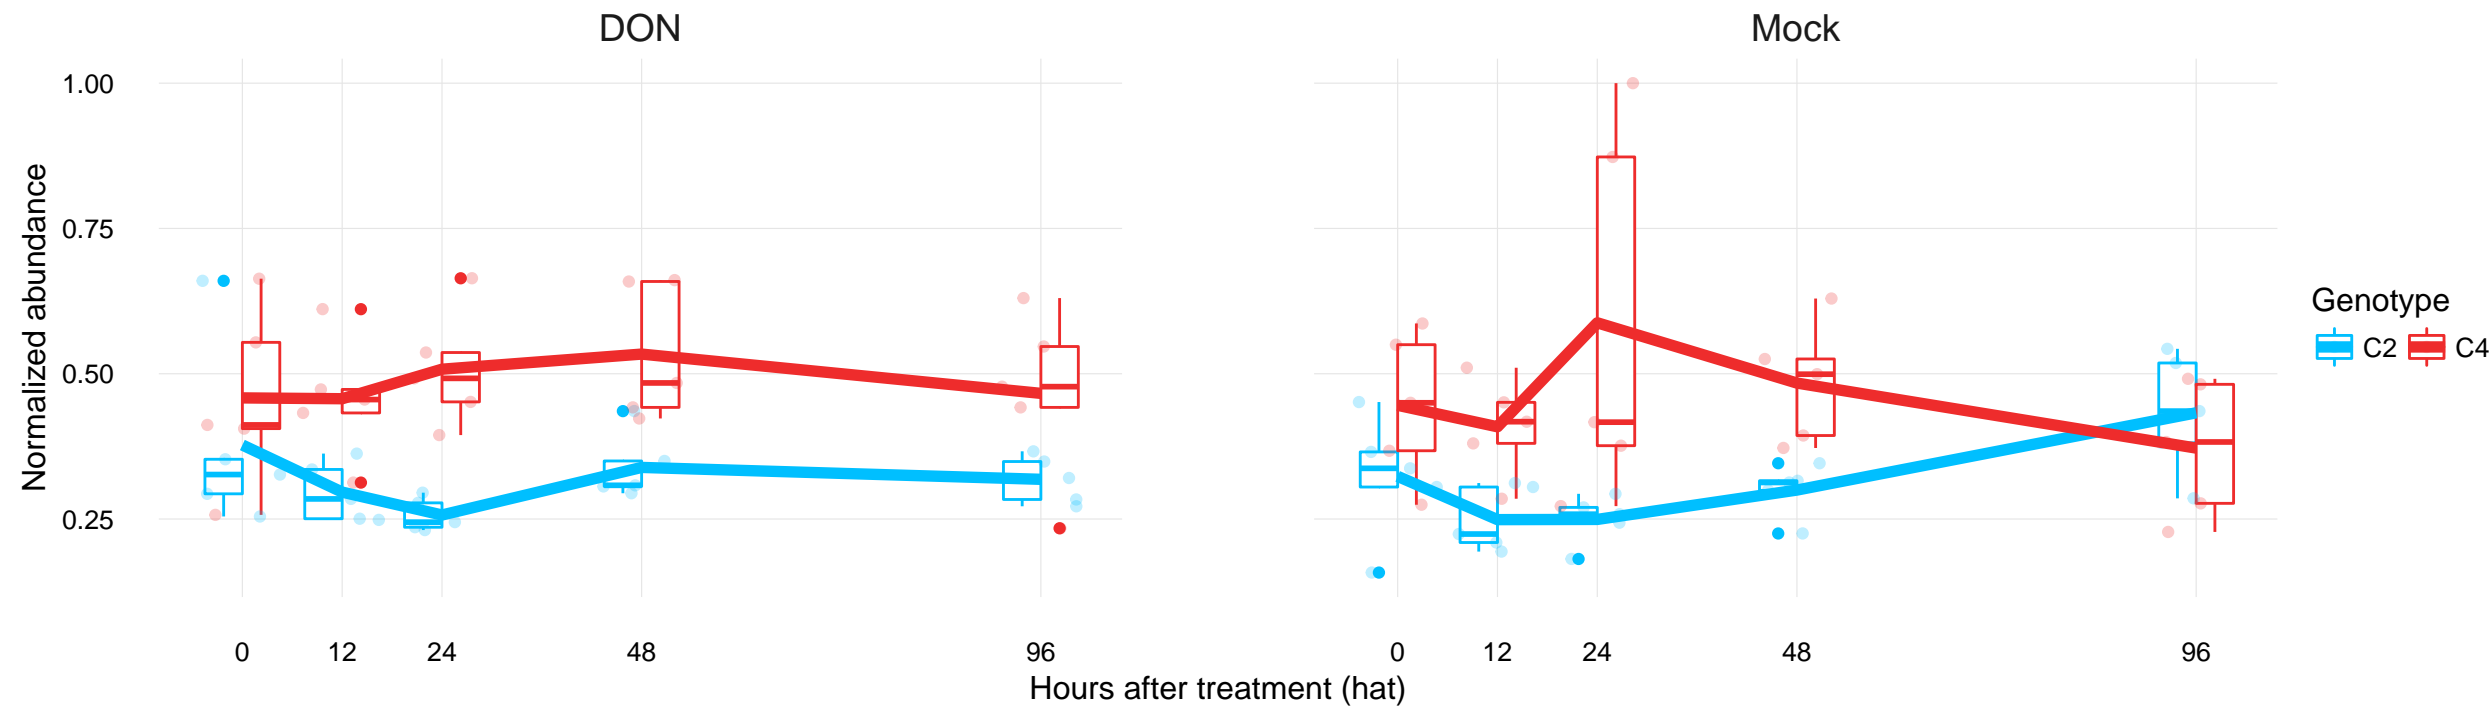

## CM, Remus; different treatments

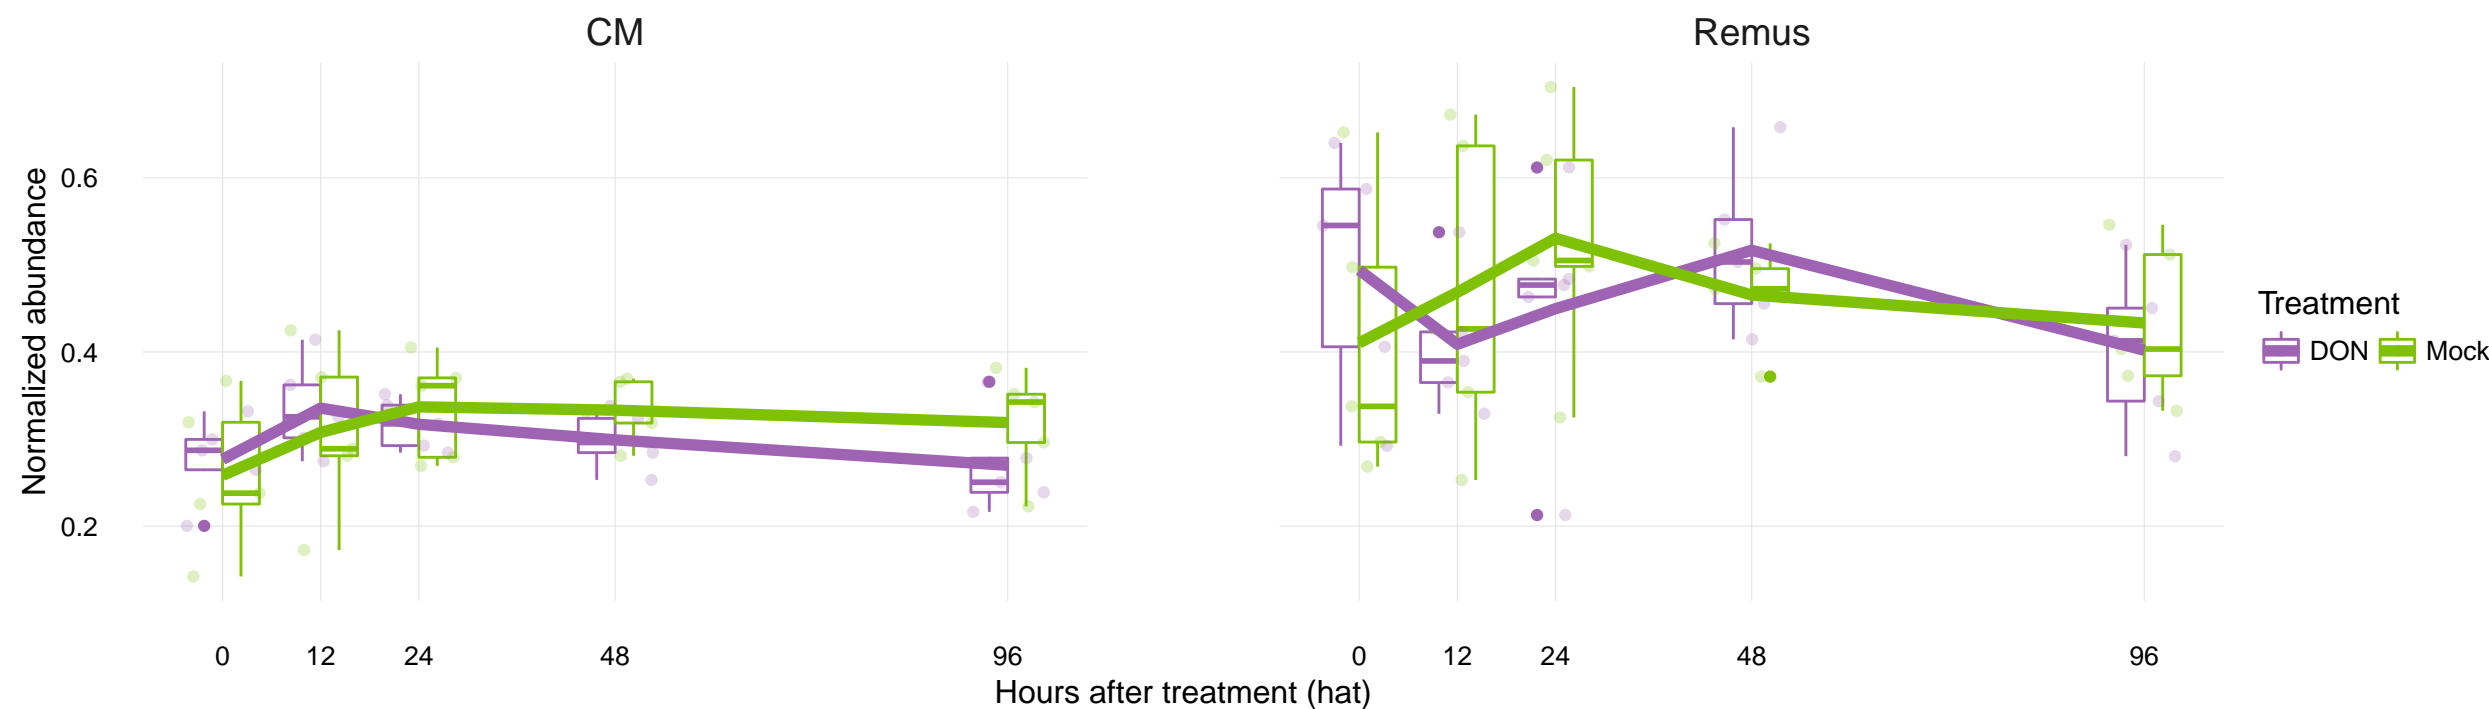

## DON, Mock; all four genotypes

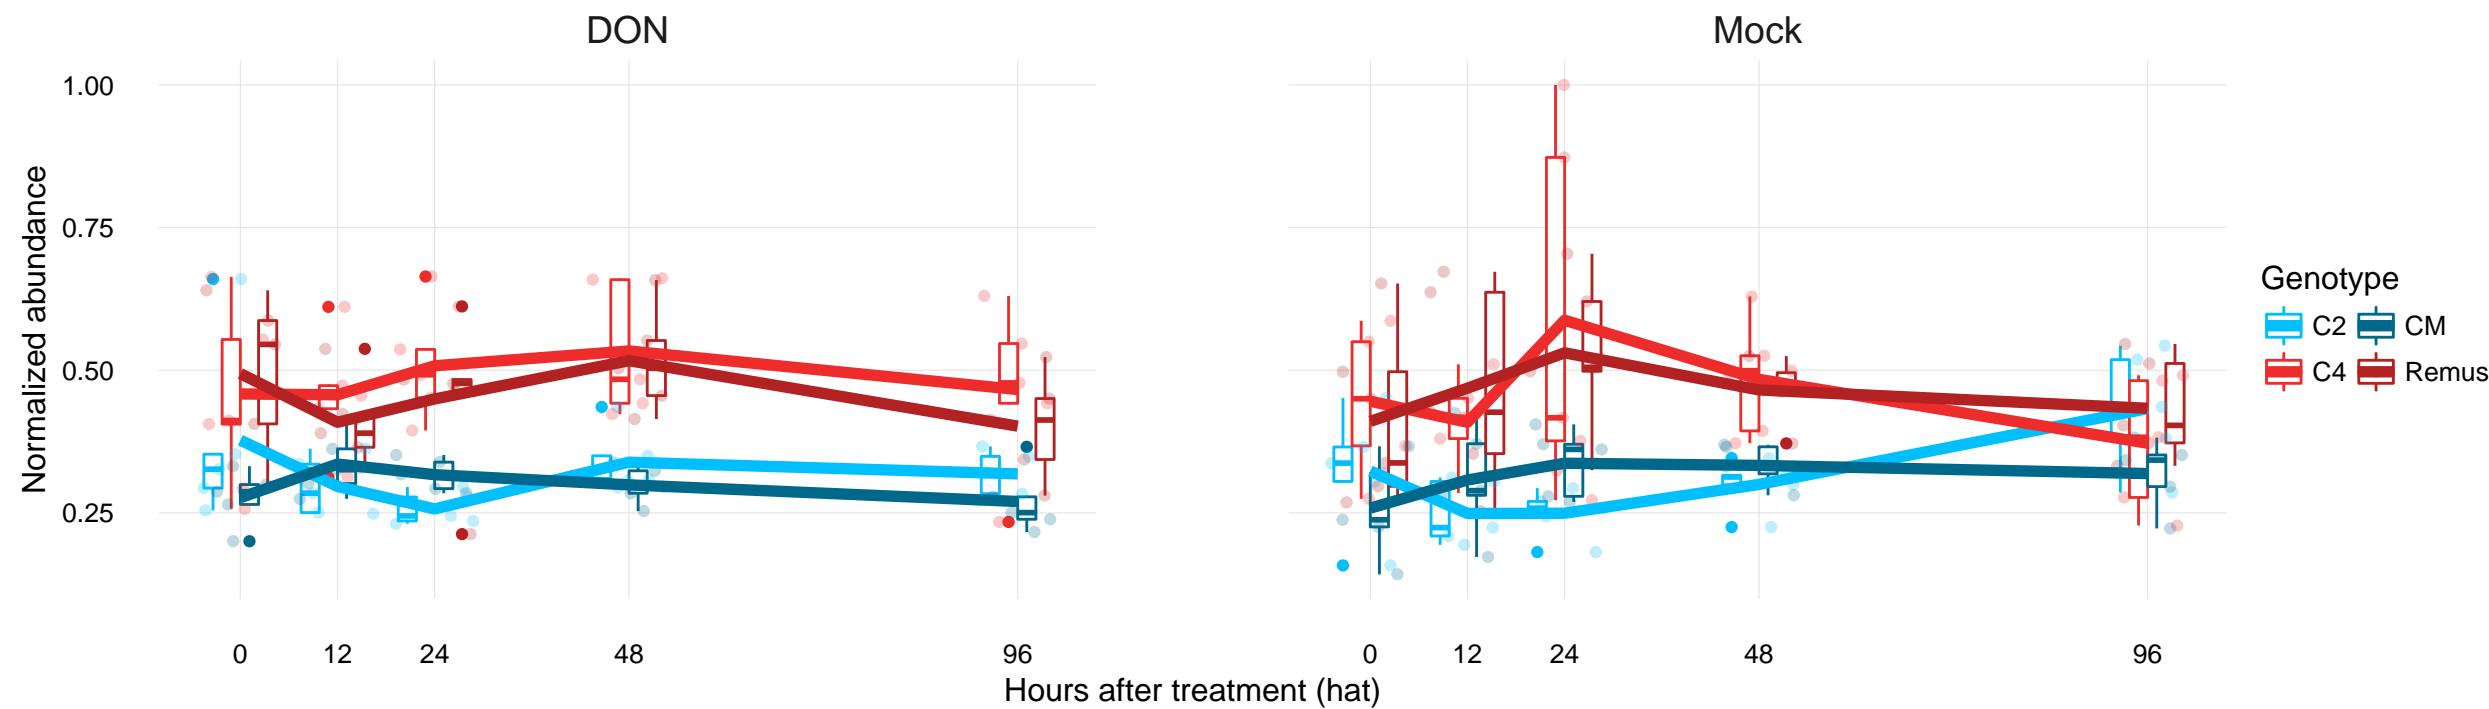

# A.83

Annotated as Flavonoid (GlcF)  
(6 database hits)

|                |                          |
|----------------|--------------------------|
| MZ             | 557.1631                 |
| RT             | 14.88 min                |
| Normalization  | Directly via KPX samples |
| Cluster        | –                        |
| Cn total / Phe | 26 /                     |

## C2, C4; different treatments

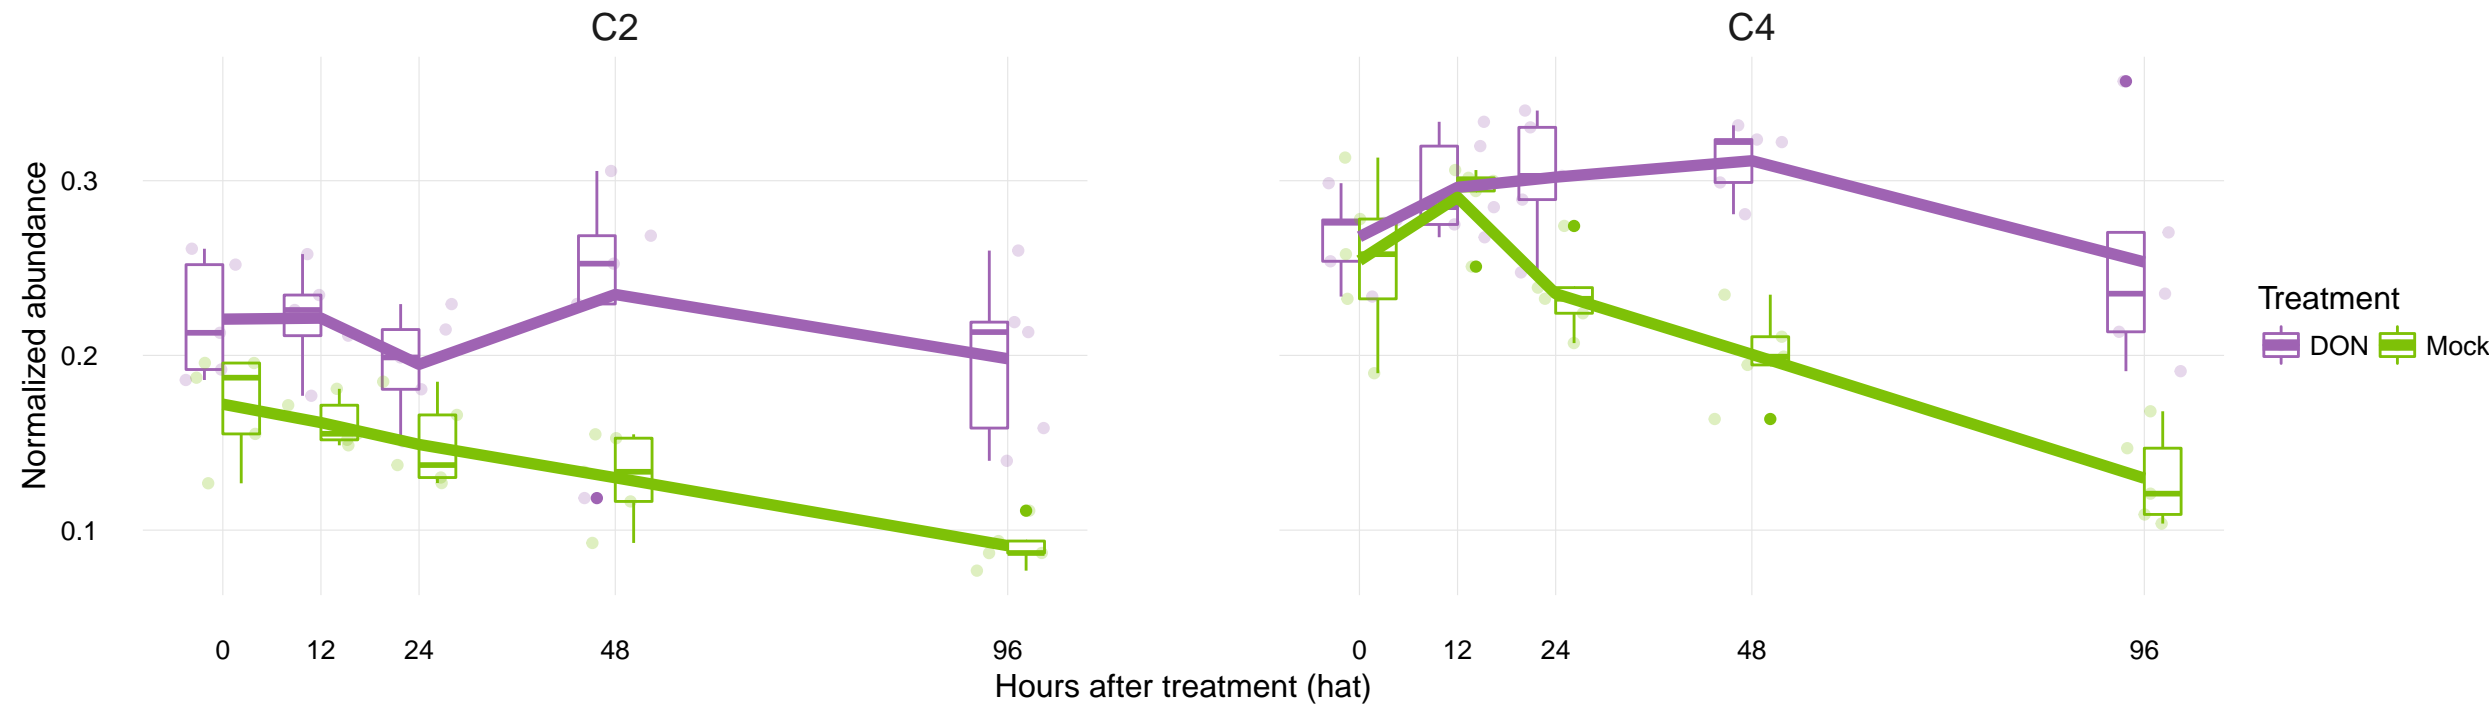

## DON, Mock; different genotypes

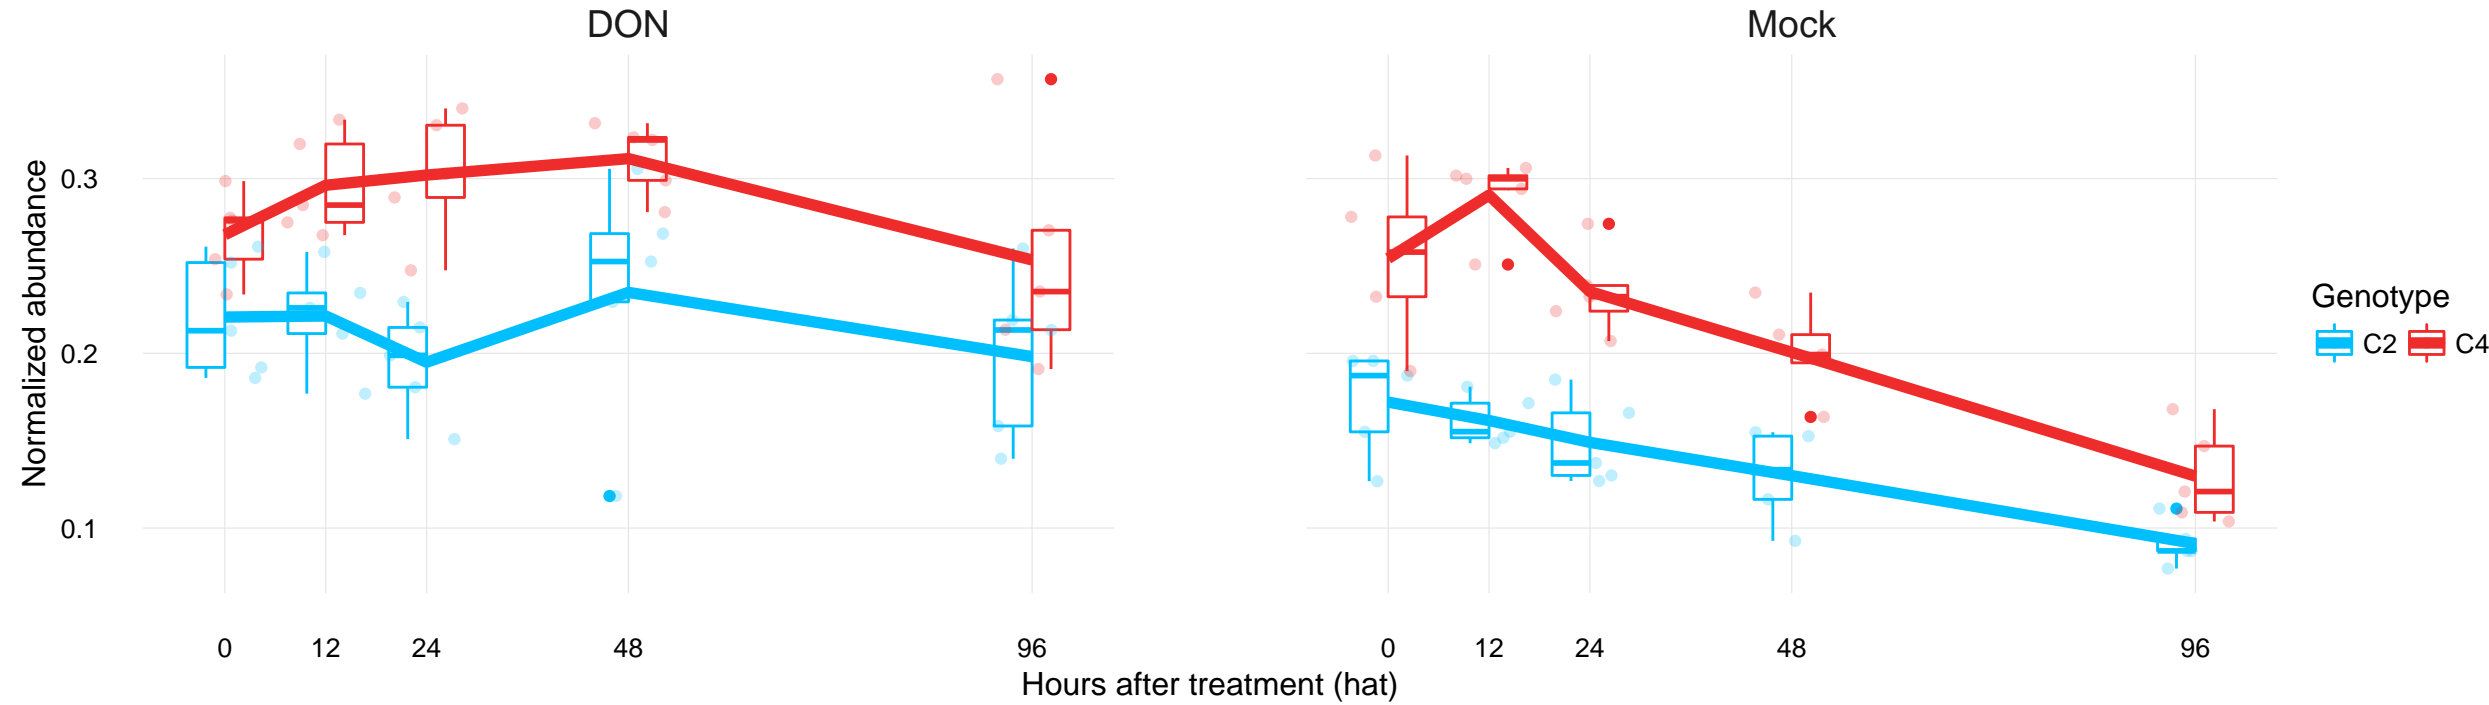

## CM, Remus; different treatments

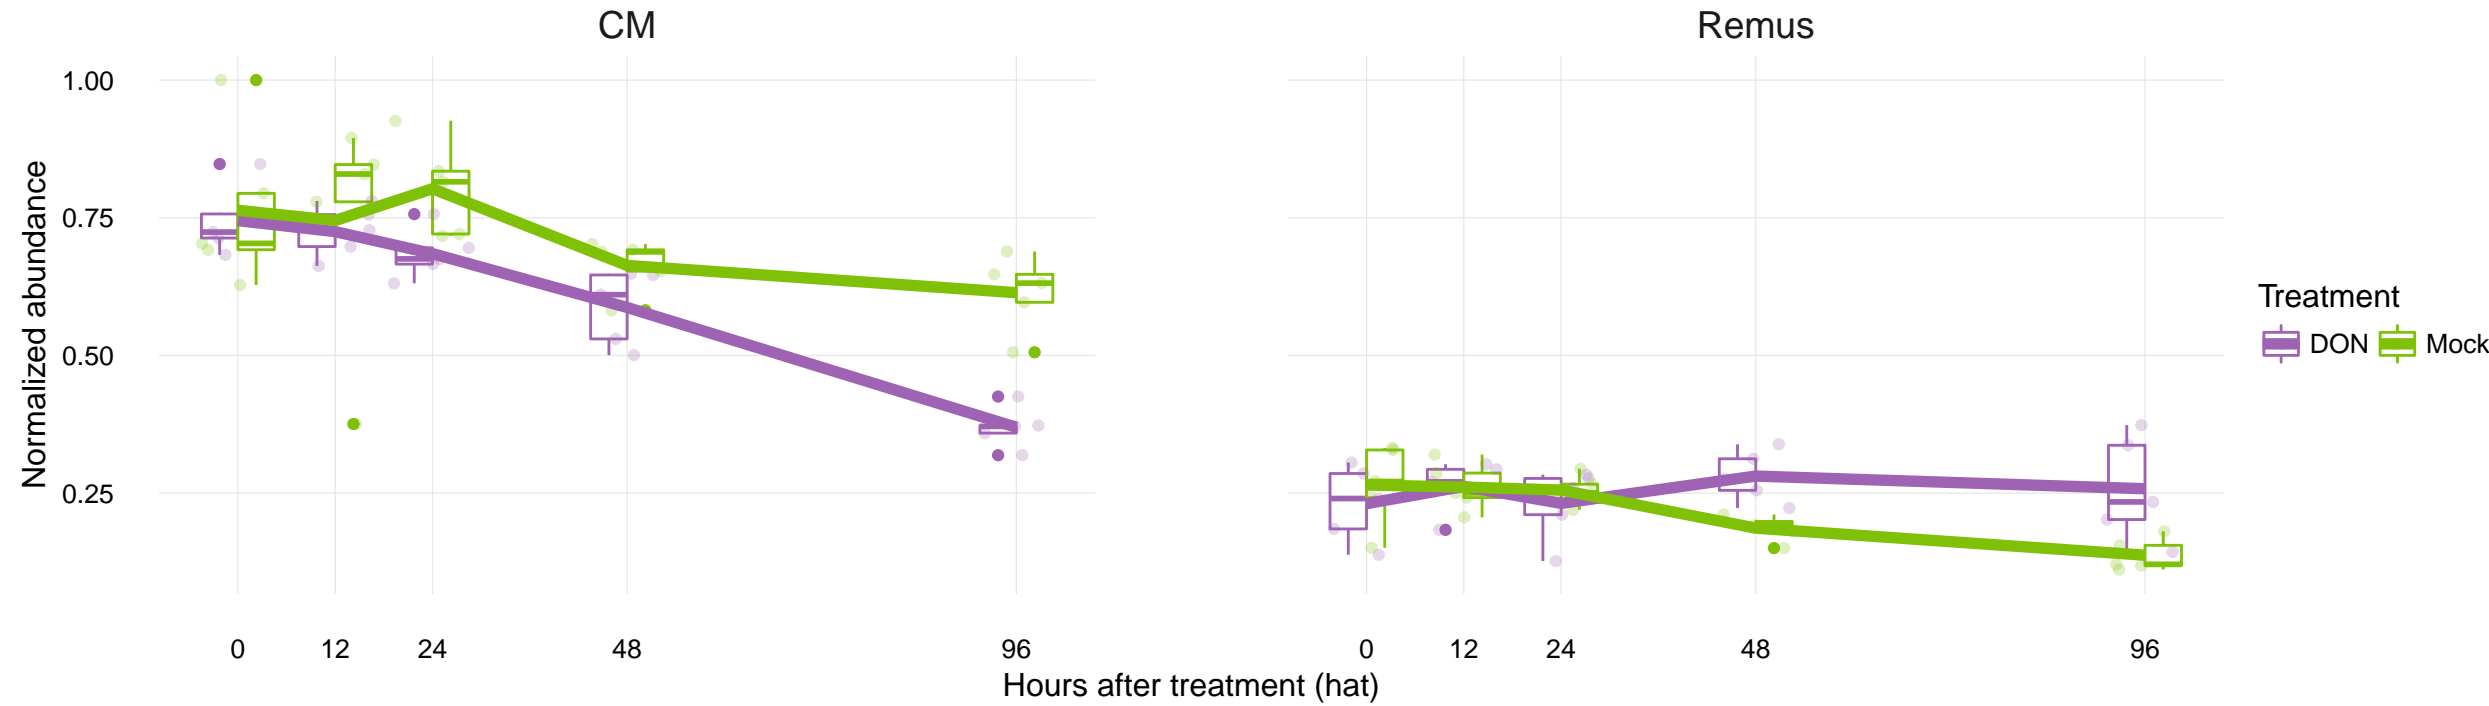

## DON, Mock; all four genotypes

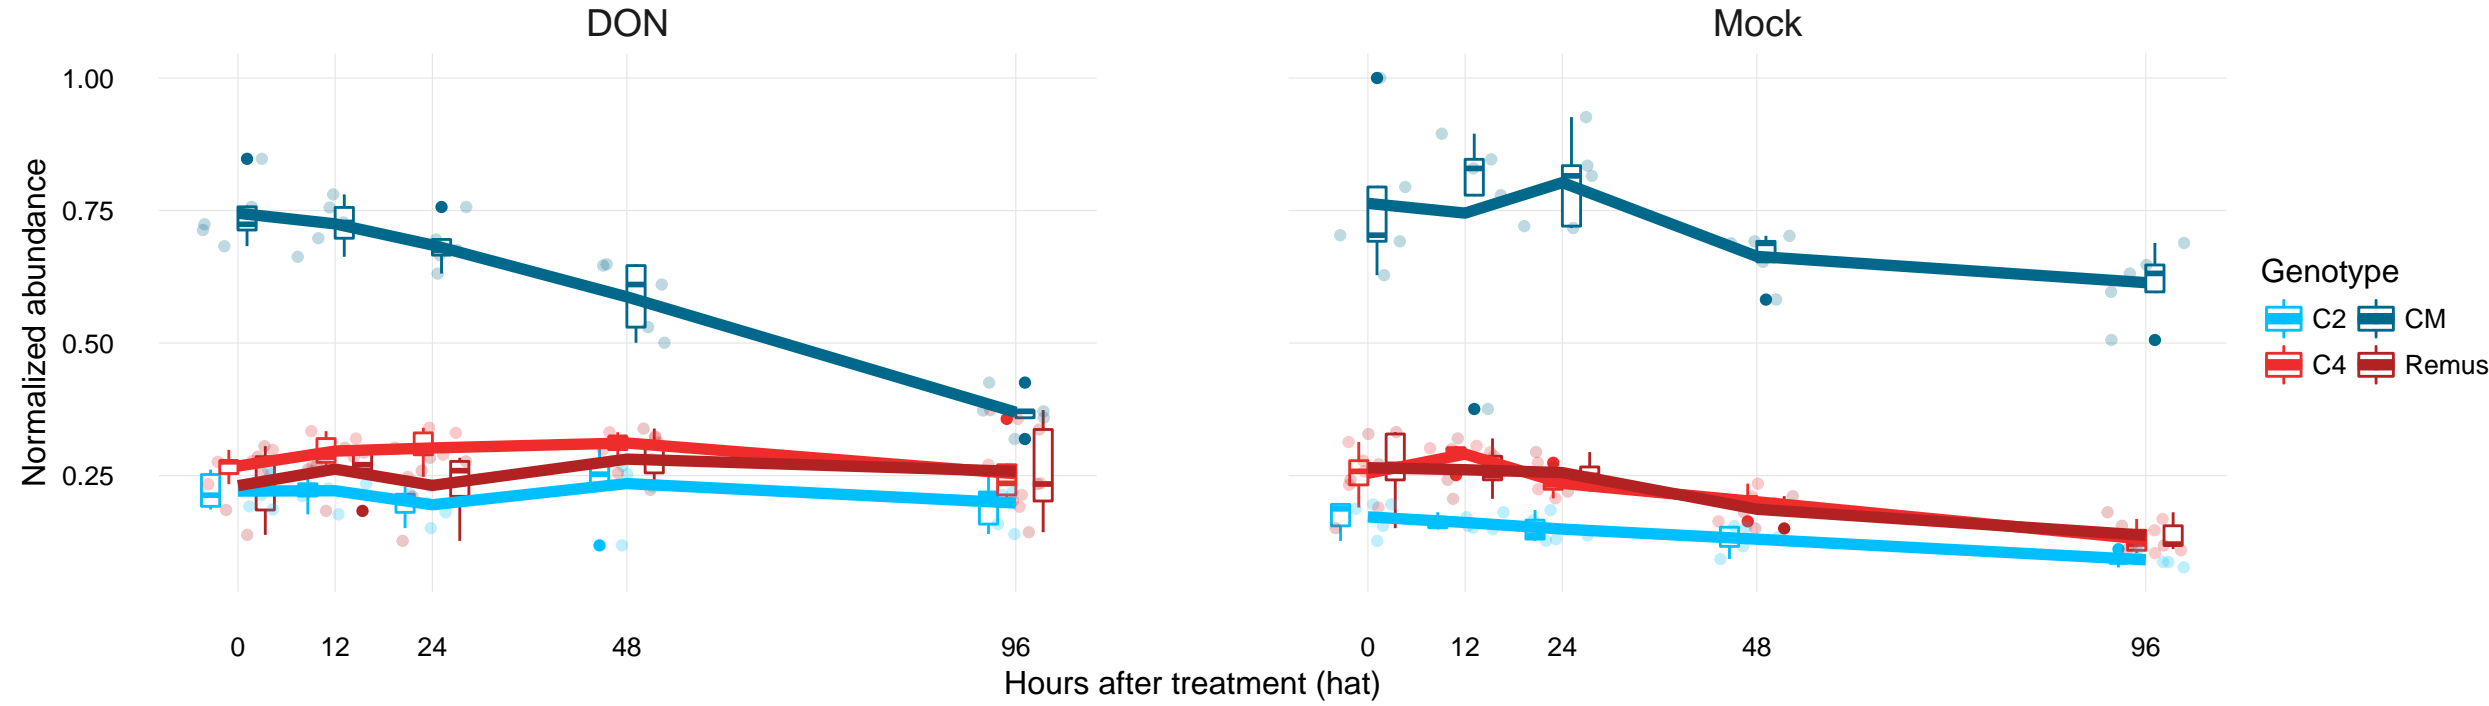

# A.45

Annotated as Flavonoid  
(30 database hits)

|                |                          |
|----------------|--------------------------|
| MZ             | 373.1284                 |
| RT             | 11.58 min                |
| Normalization  | Directly via KPX samples |
| Cluster        | –                        |
| Cn total / Phe | 20 /                     |

## C2, C4; different treatments

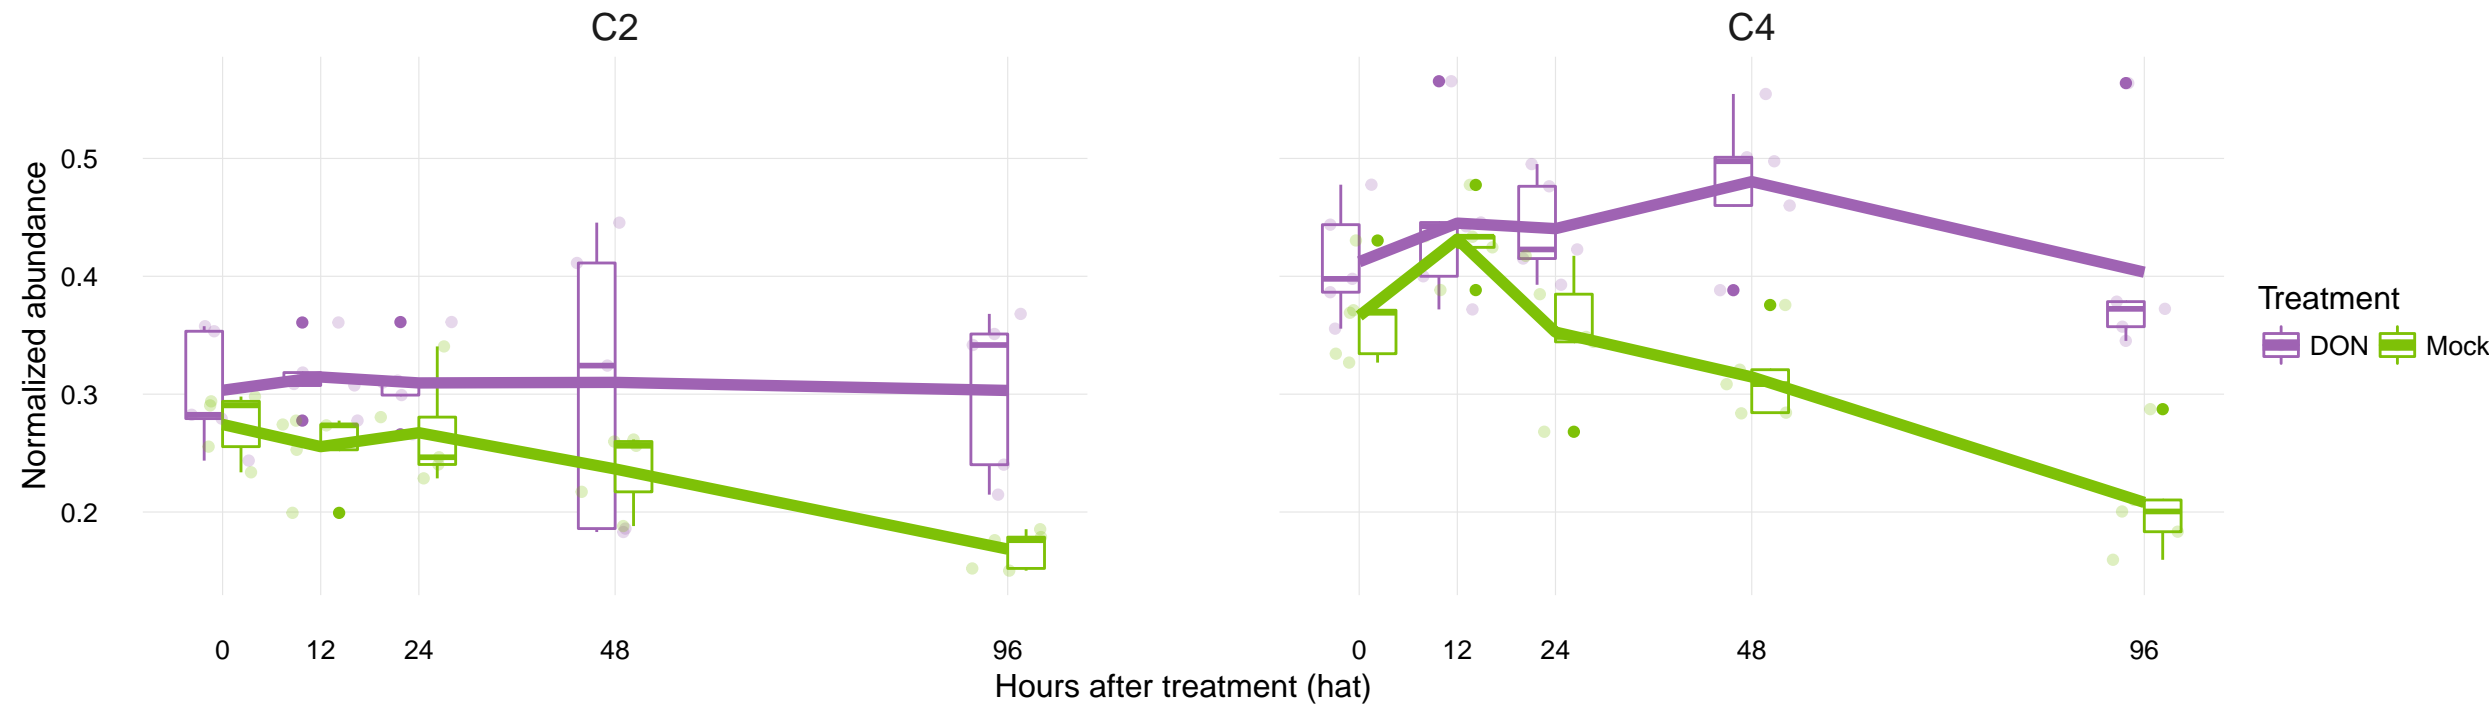

## DON, Mock; different genotypes

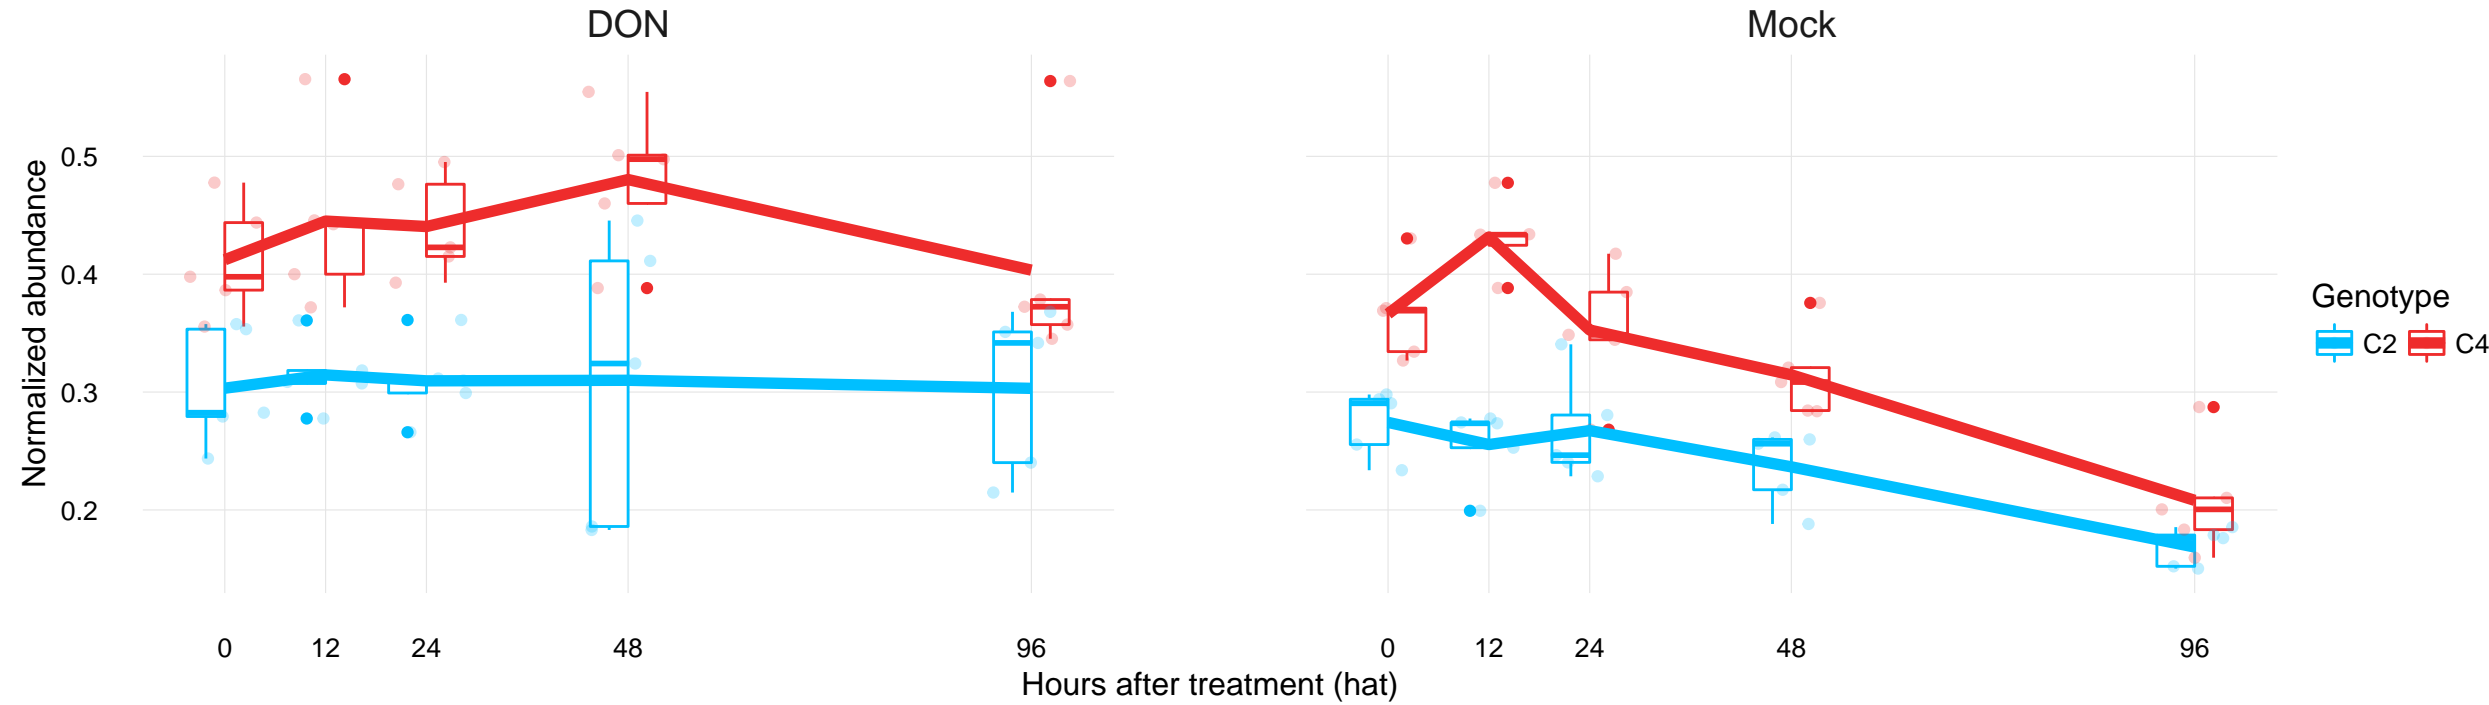

## CM, Remus; different treatments

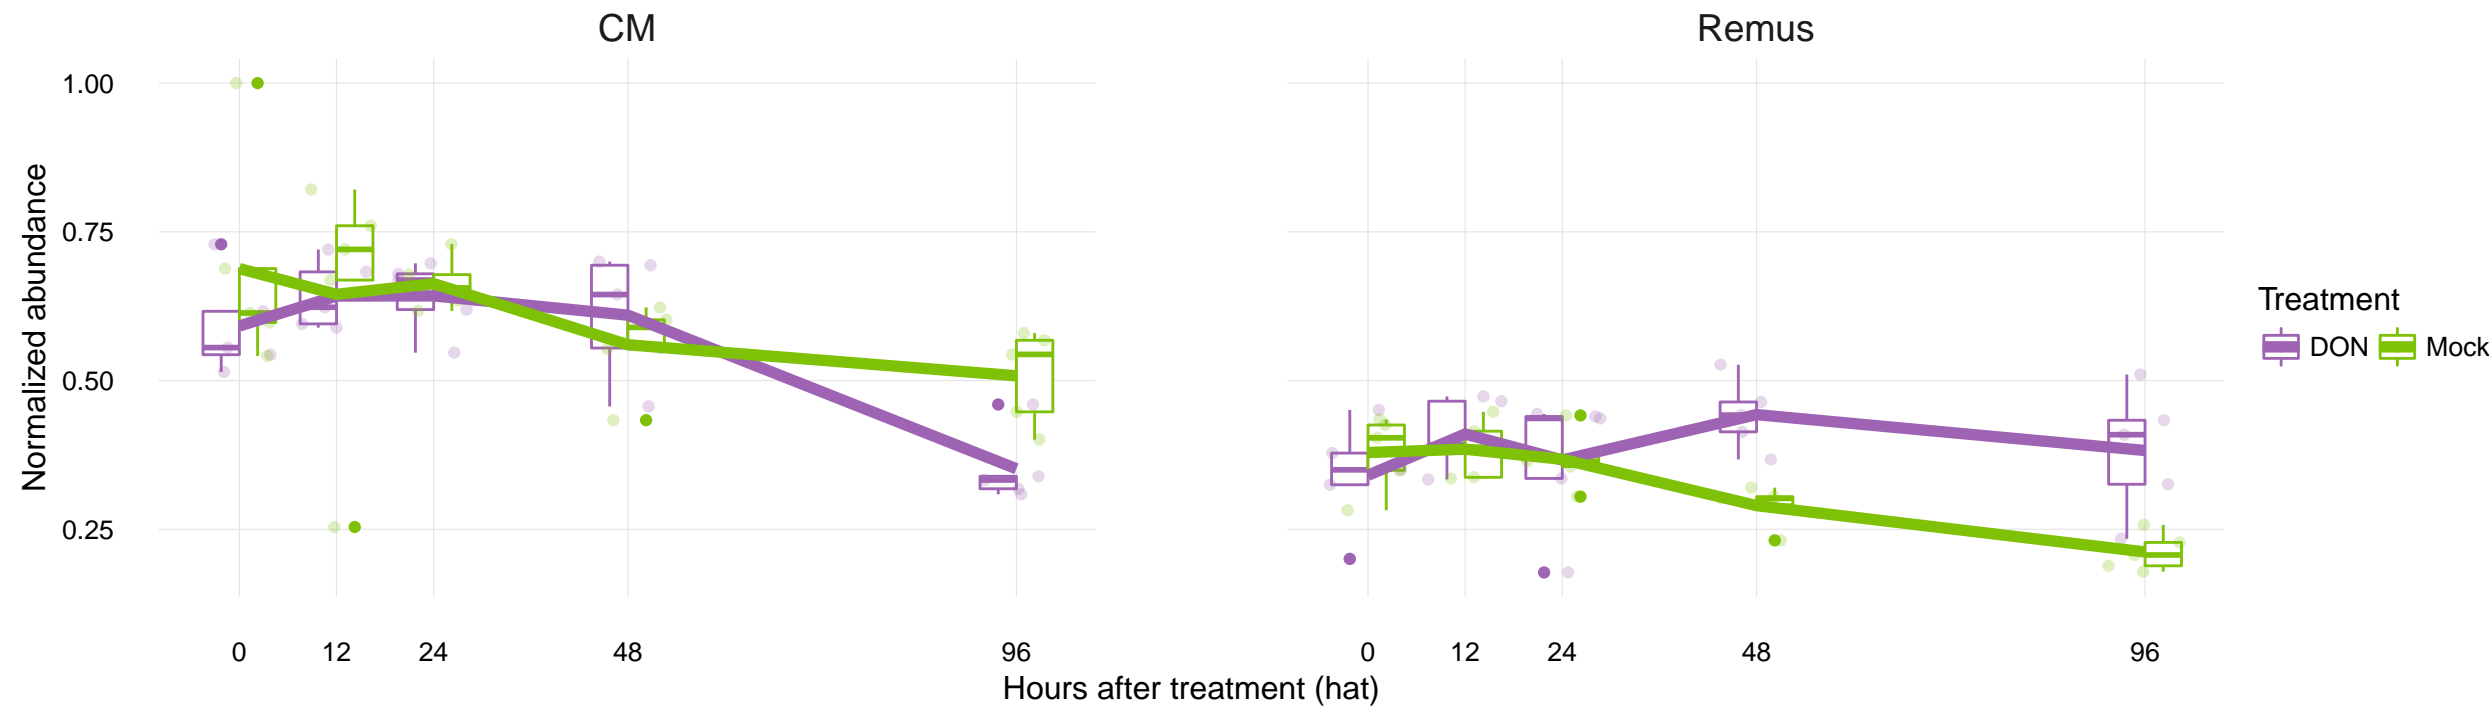

## DON, Mock; all four genotypes

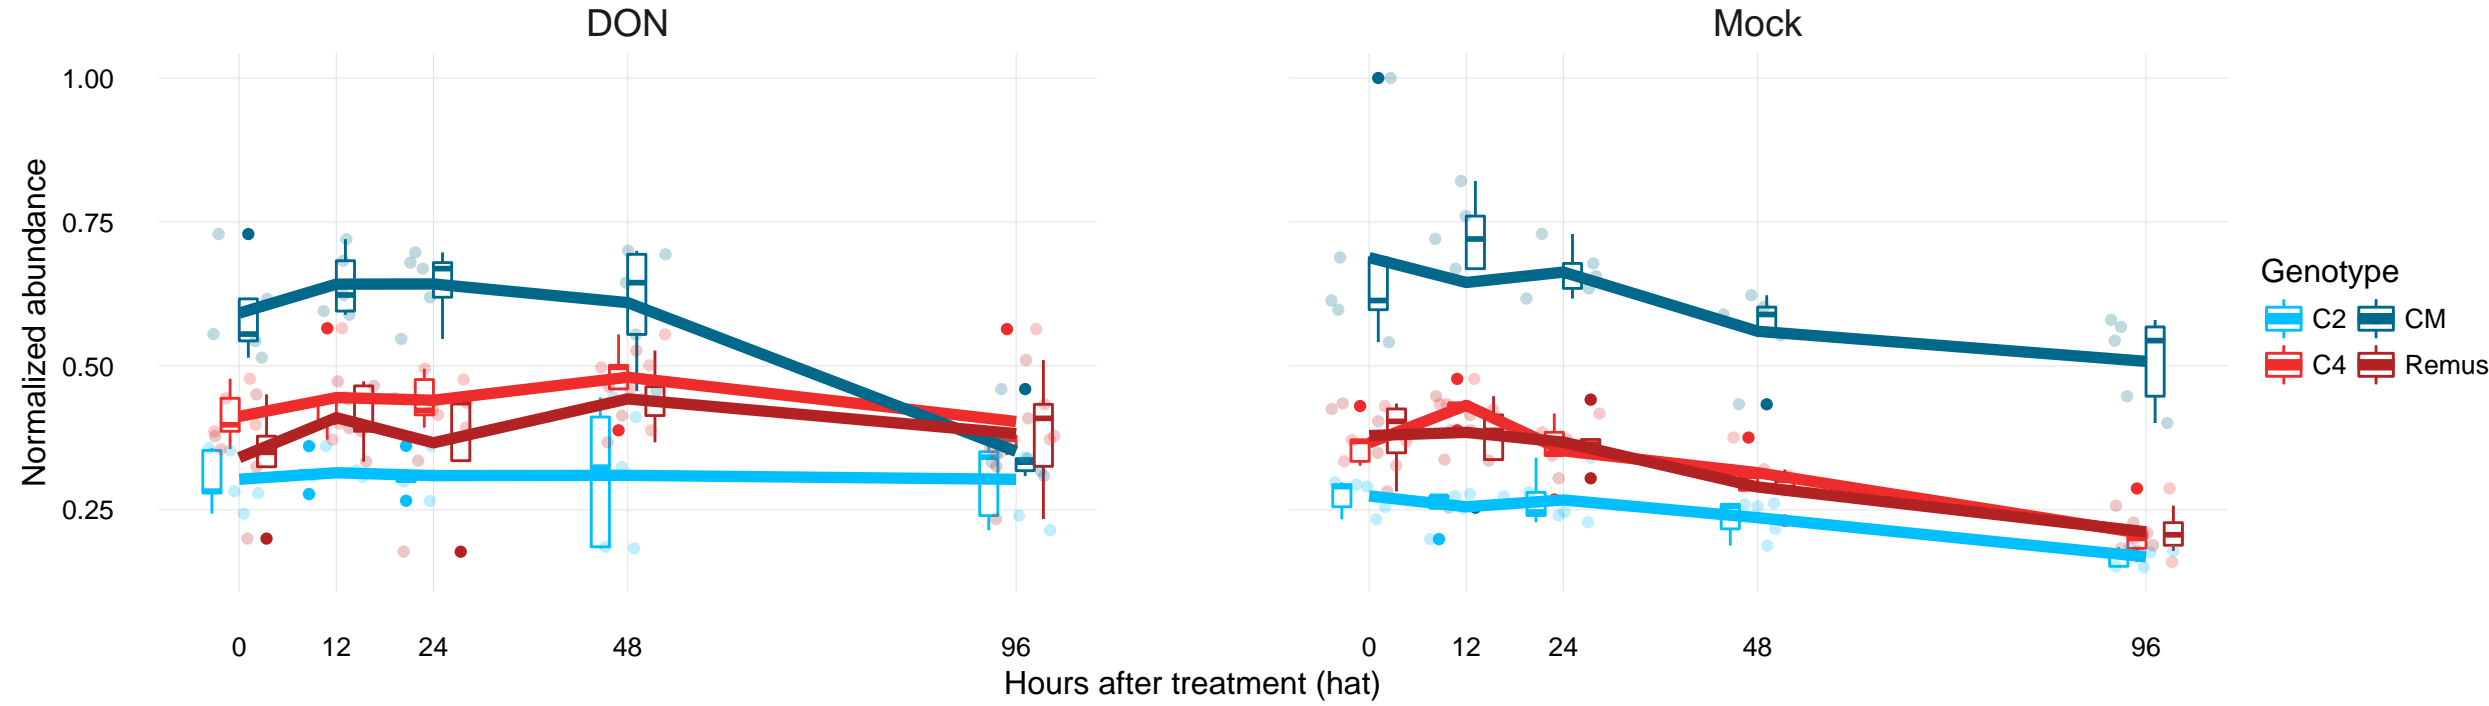



# A.39

Annotated as others (Coumarins)  
(1 database hit)

|                |                                                |
|----------------|------------------------------------------------|
| MZ             | 177.0546                                       |
| RT             | 10.3 min                                       |
| Normalization  | Indirectly via surrogate<br>in the KPX samples |
| Cluster        | –                                              |
| Cn total / Phe | 10 / 9                                         |

## C2, C4; different treatments

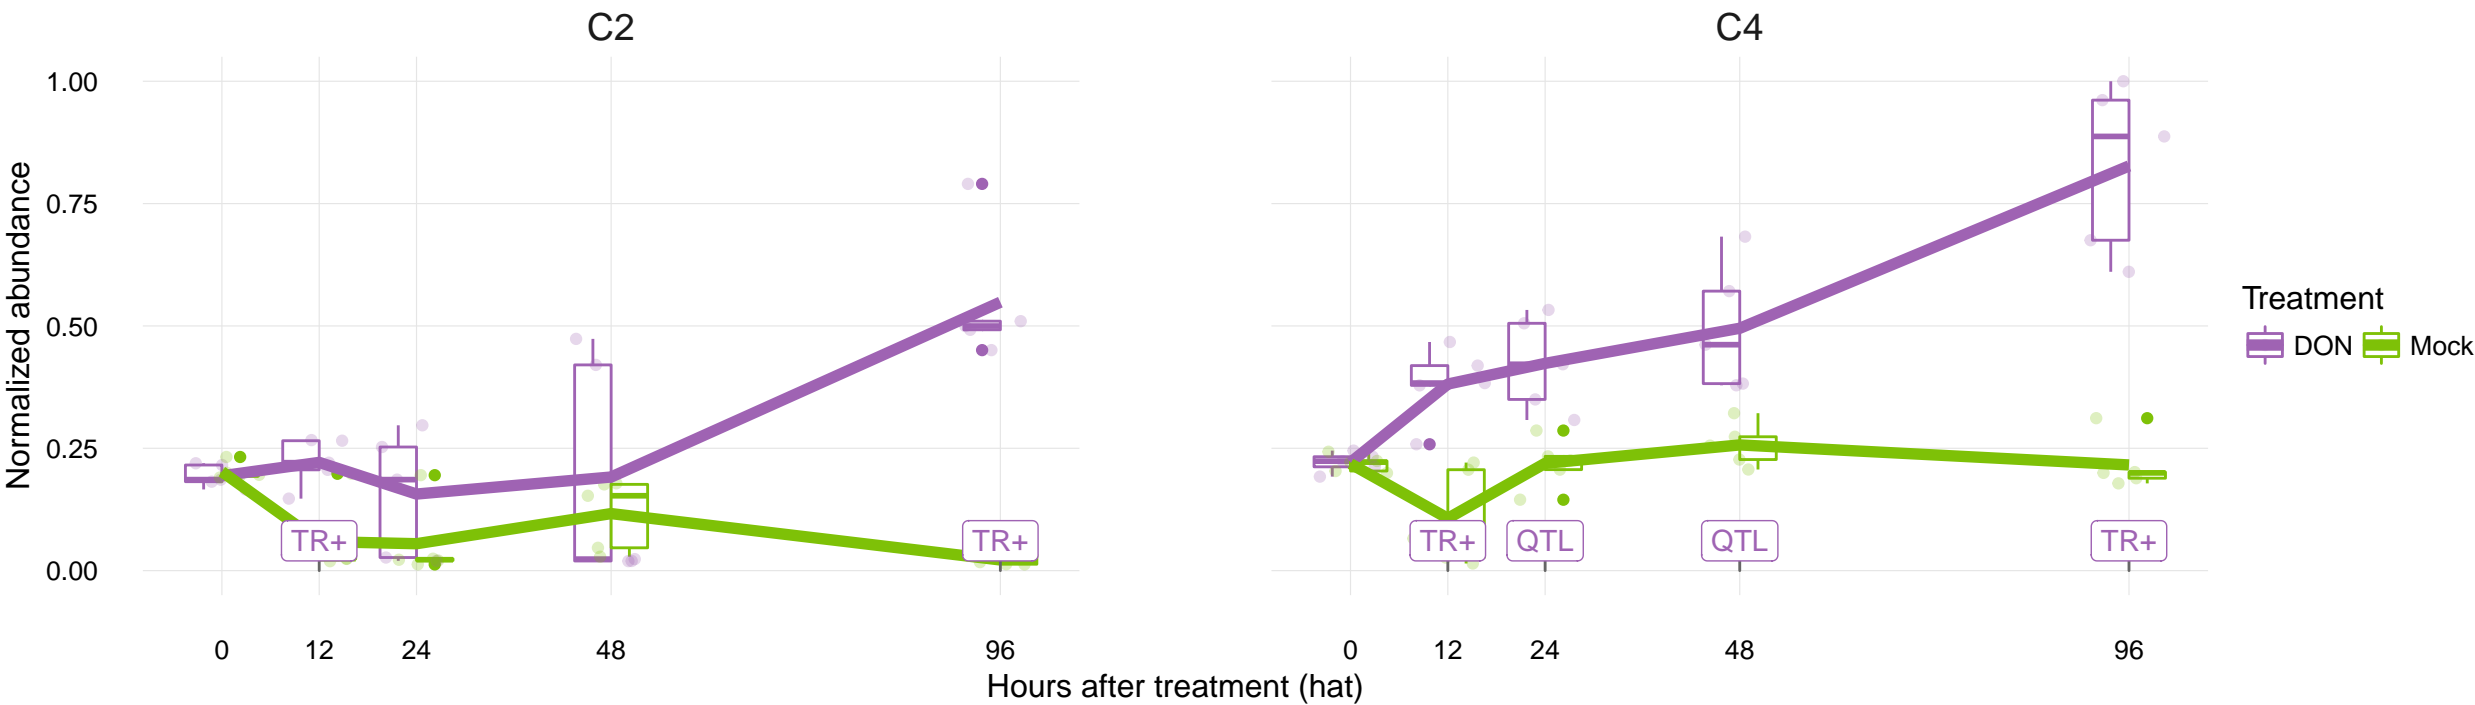

## DON, Mock; different genotypes

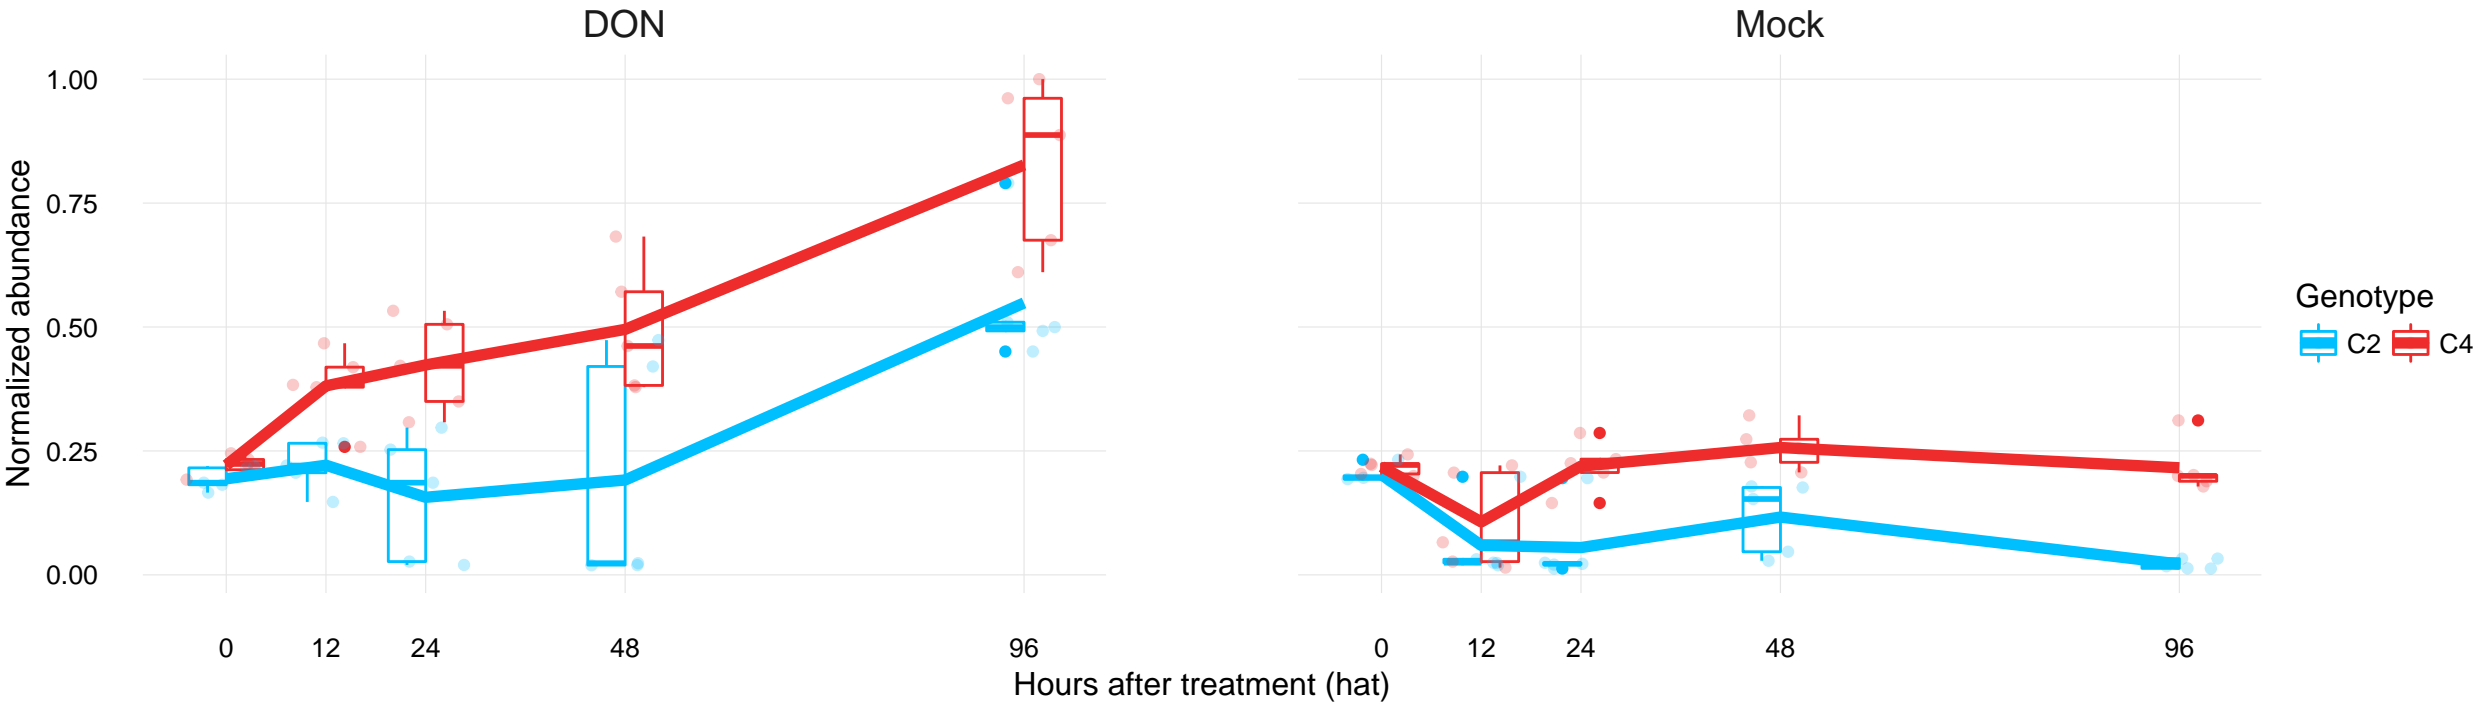

## CM, Remus; different treatments

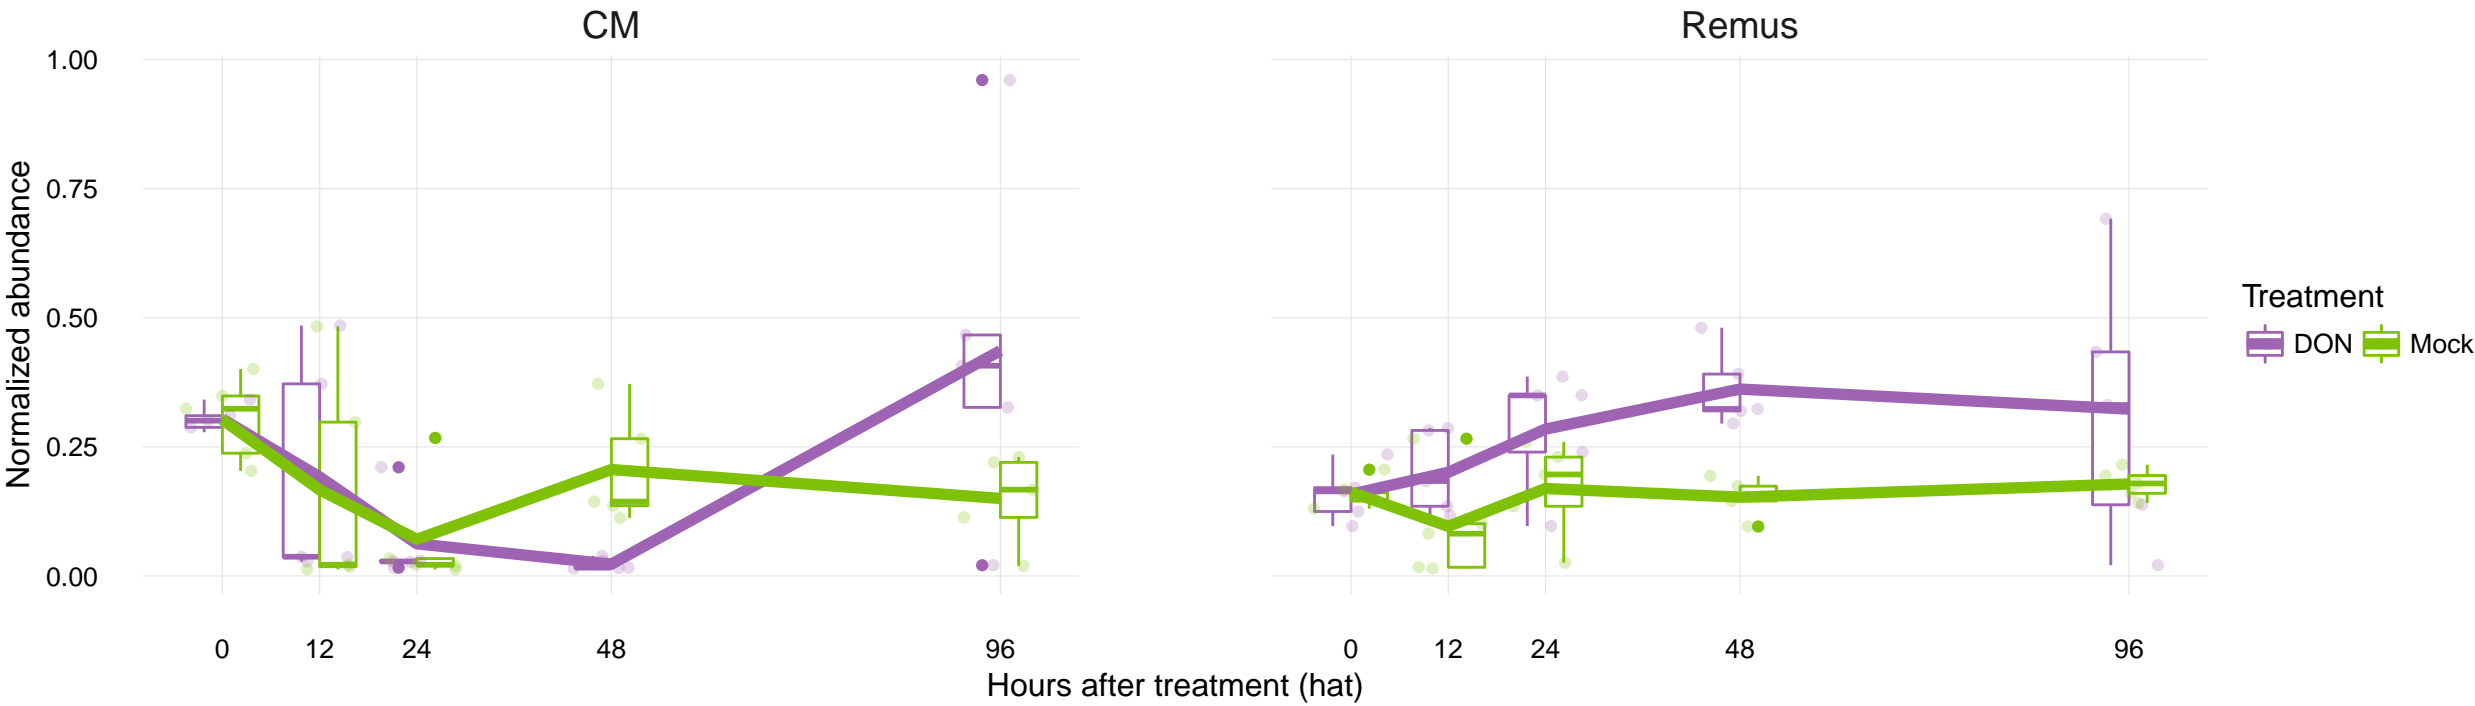

## DON, Mock; all four genotypes

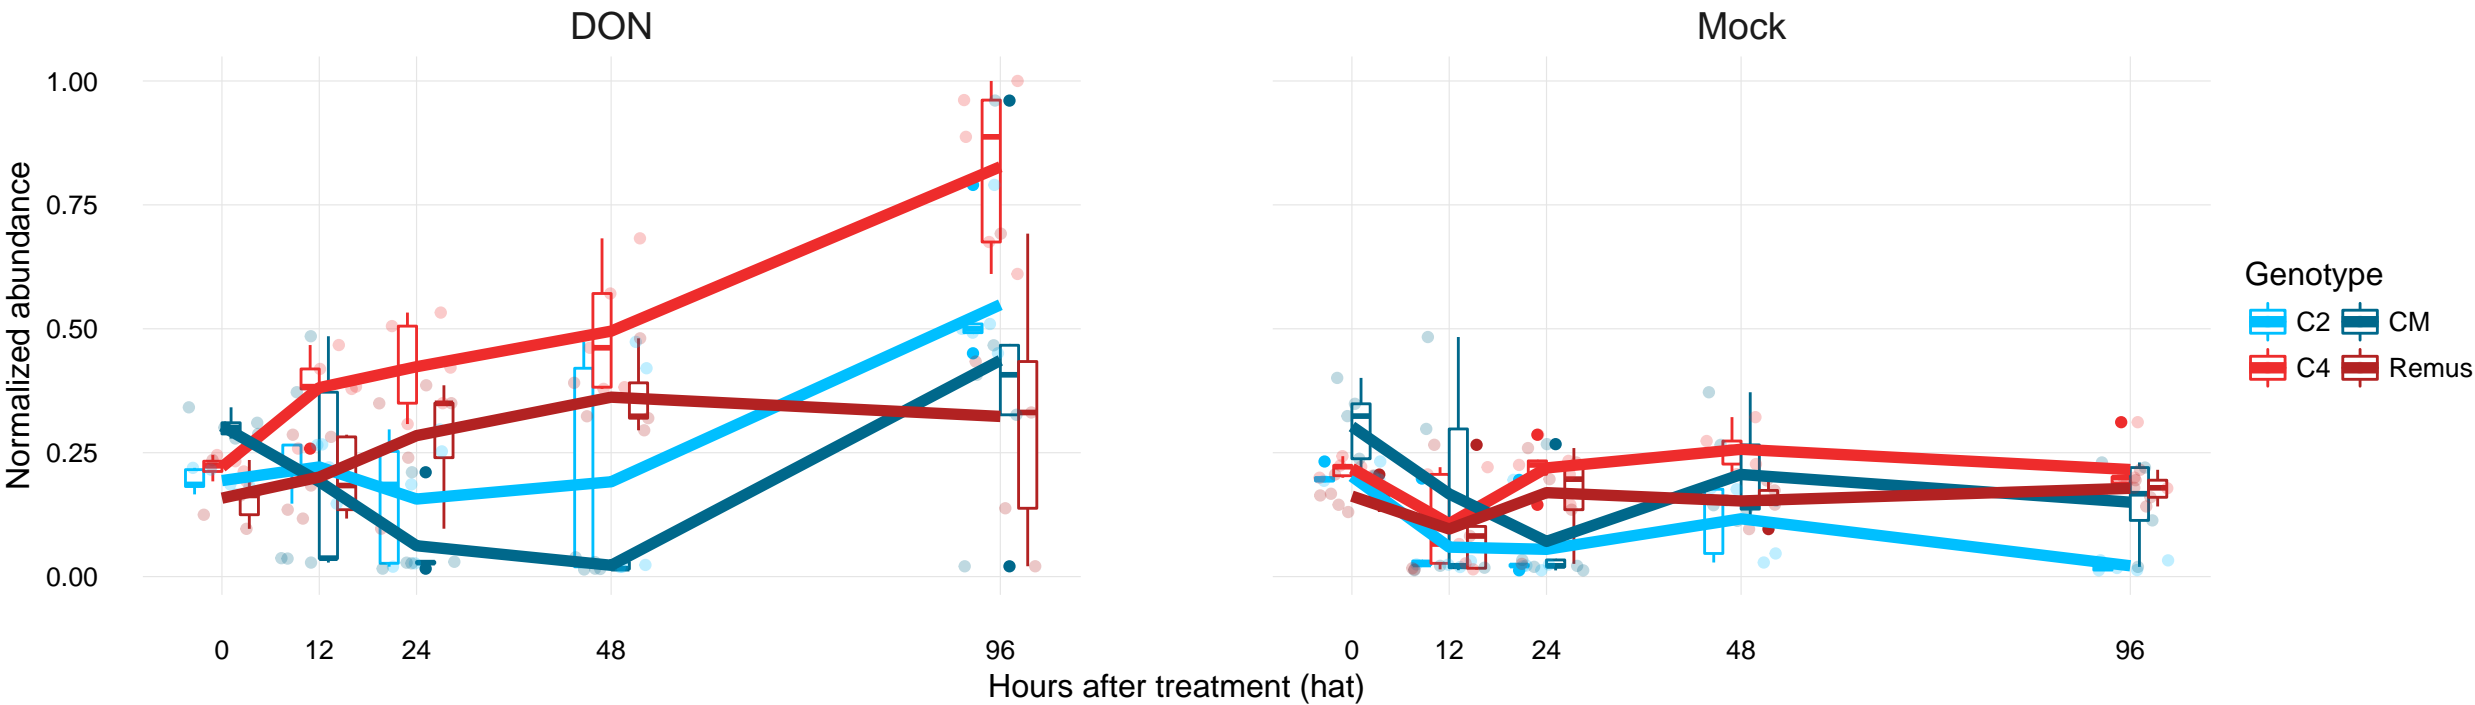



# A.47

Annotated as HCA derivative  
(1 database hit)

|                |                          |
|----------------|--------------------------|
| MZ             | 369.1182                 |
| RT             | 11.61 min                |
| Normalization  | Directly via KPX samples |
| Cluster        | –                        |
| Cn total / Phe | 17 /                     |

## C2, C4; different treatments

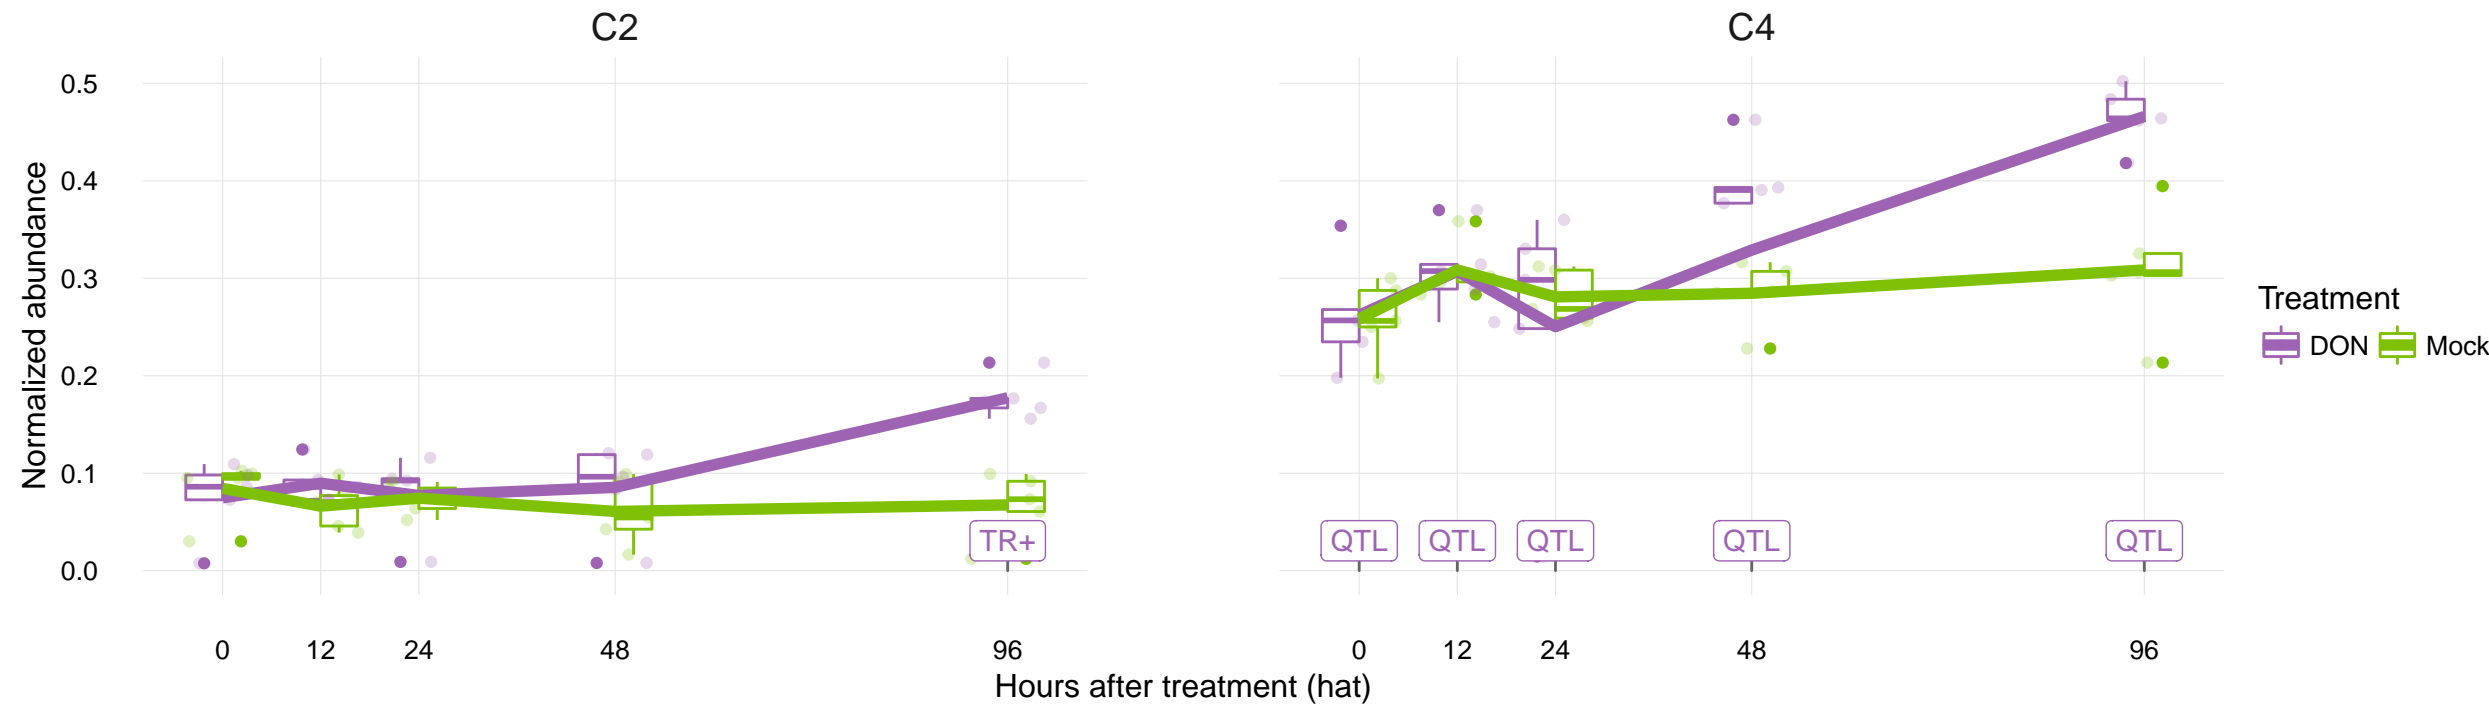

## DON, Mock; different genotypes

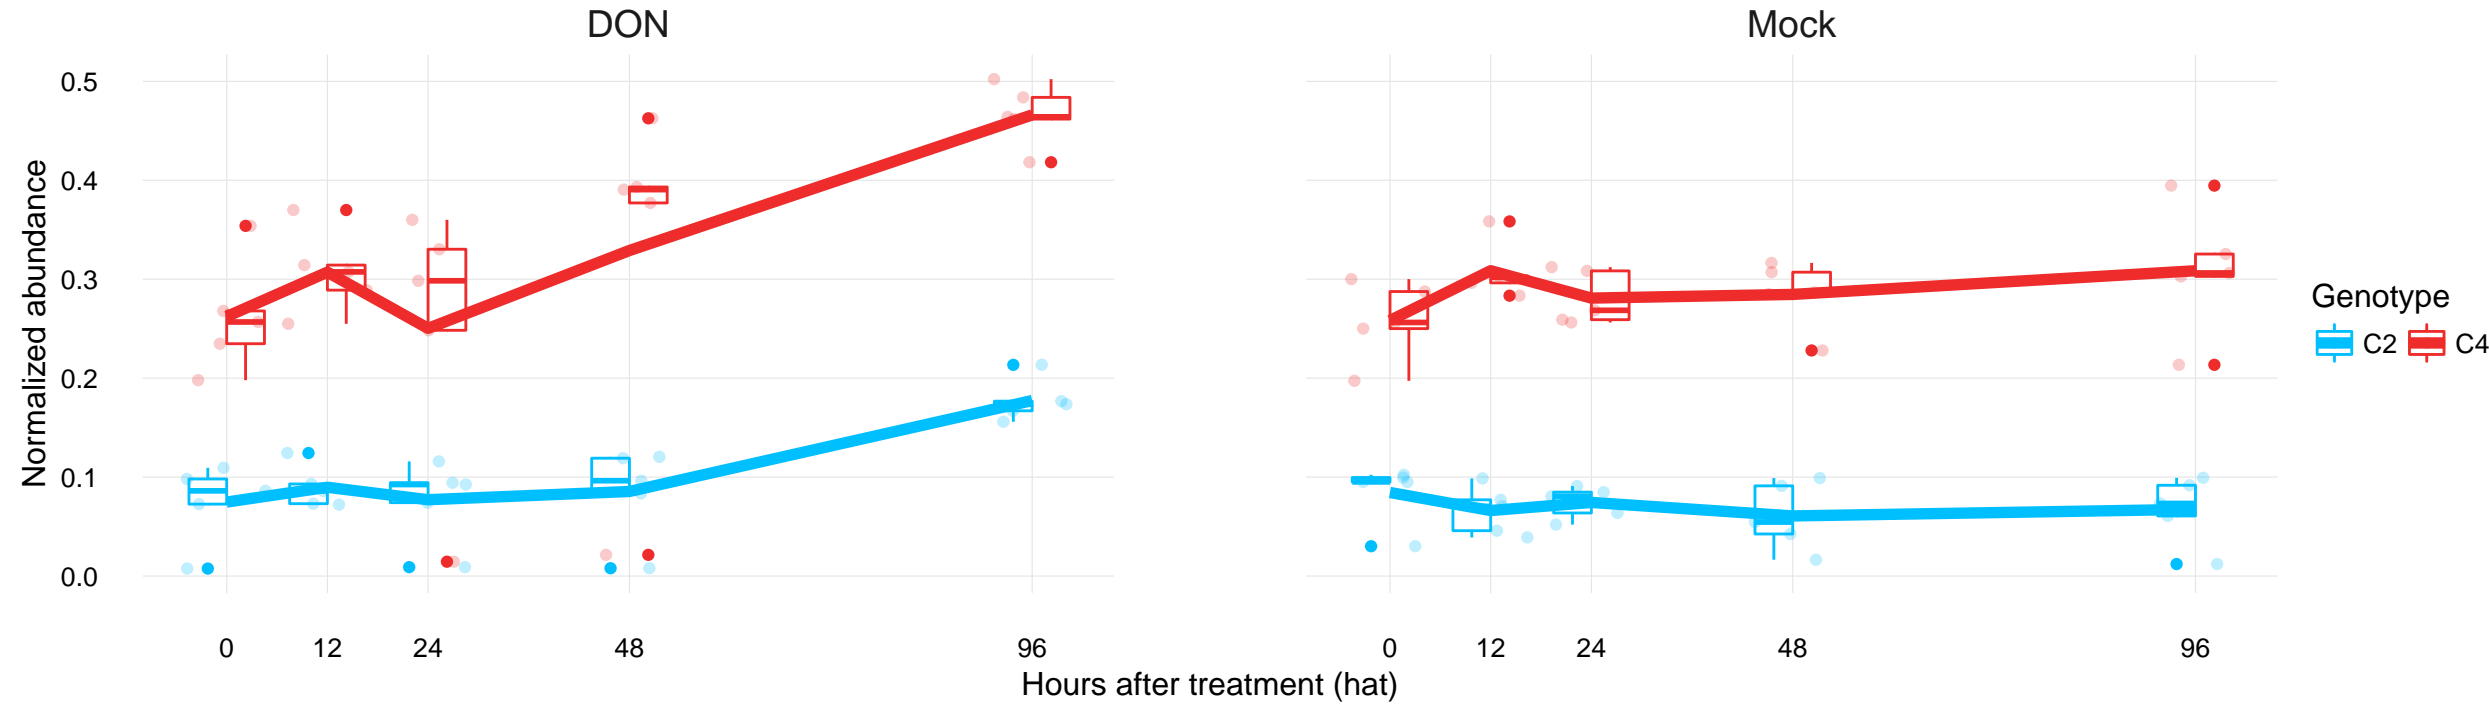

## CM, Remus; different treatments

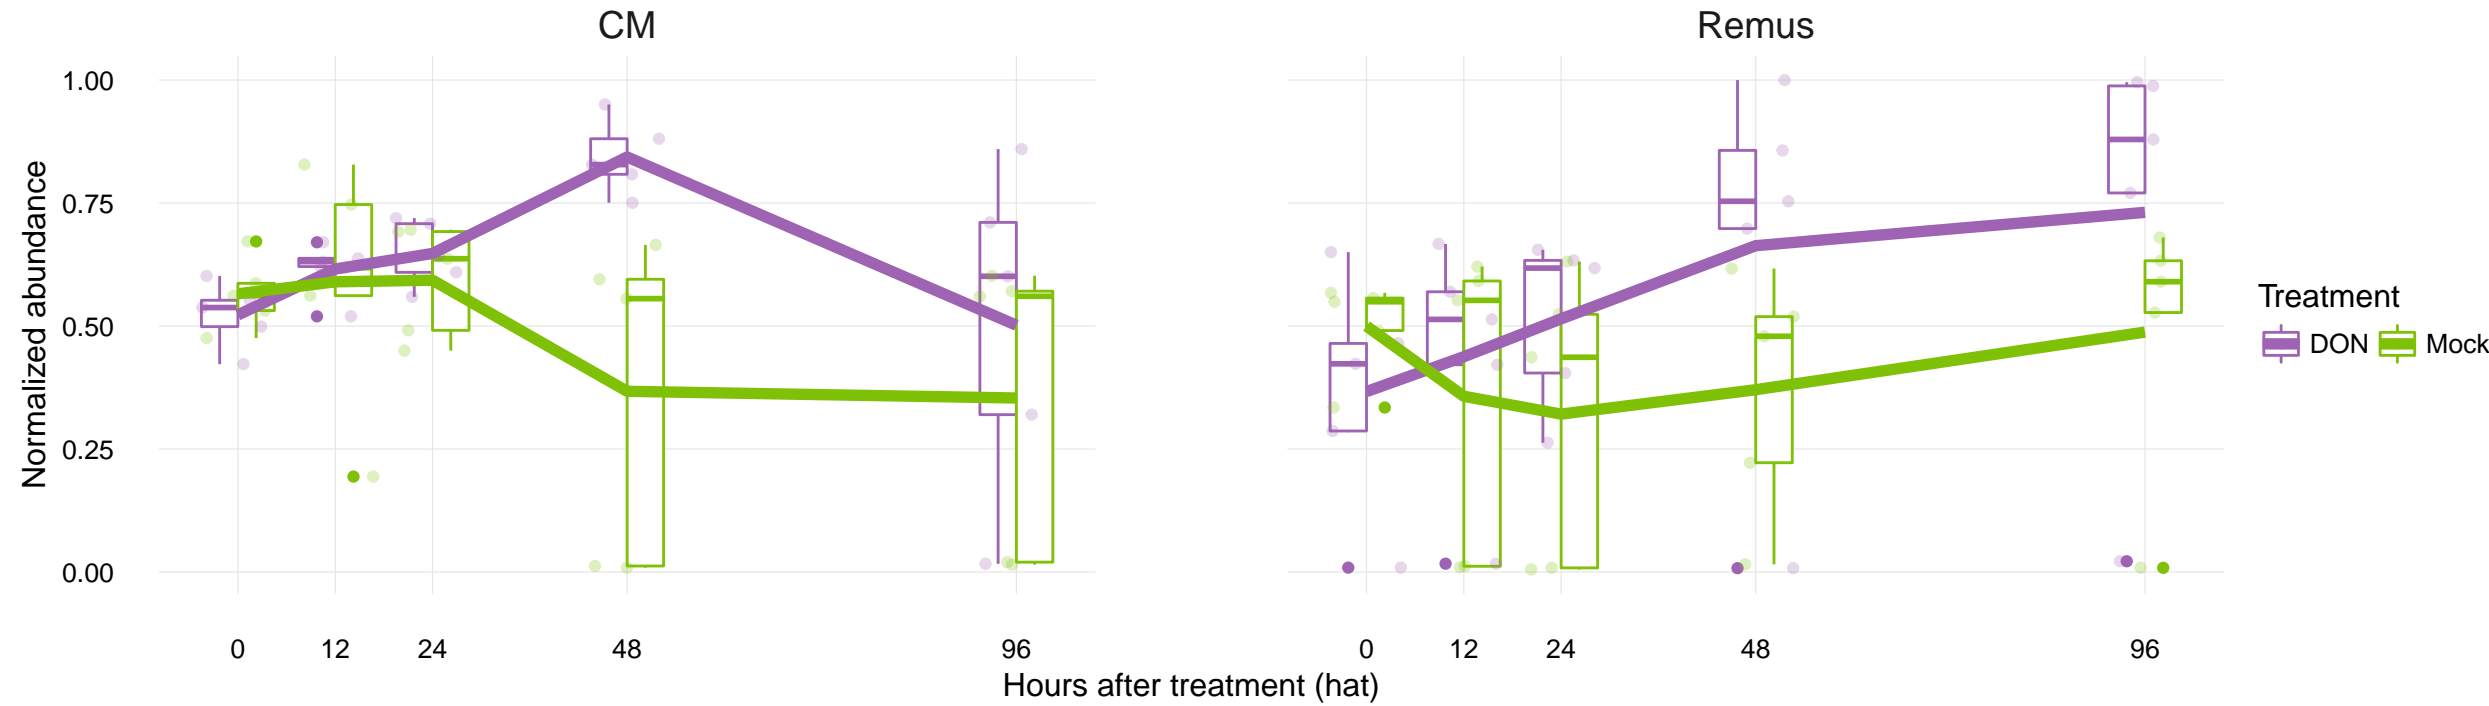

## DON, Mock; all four genotypes

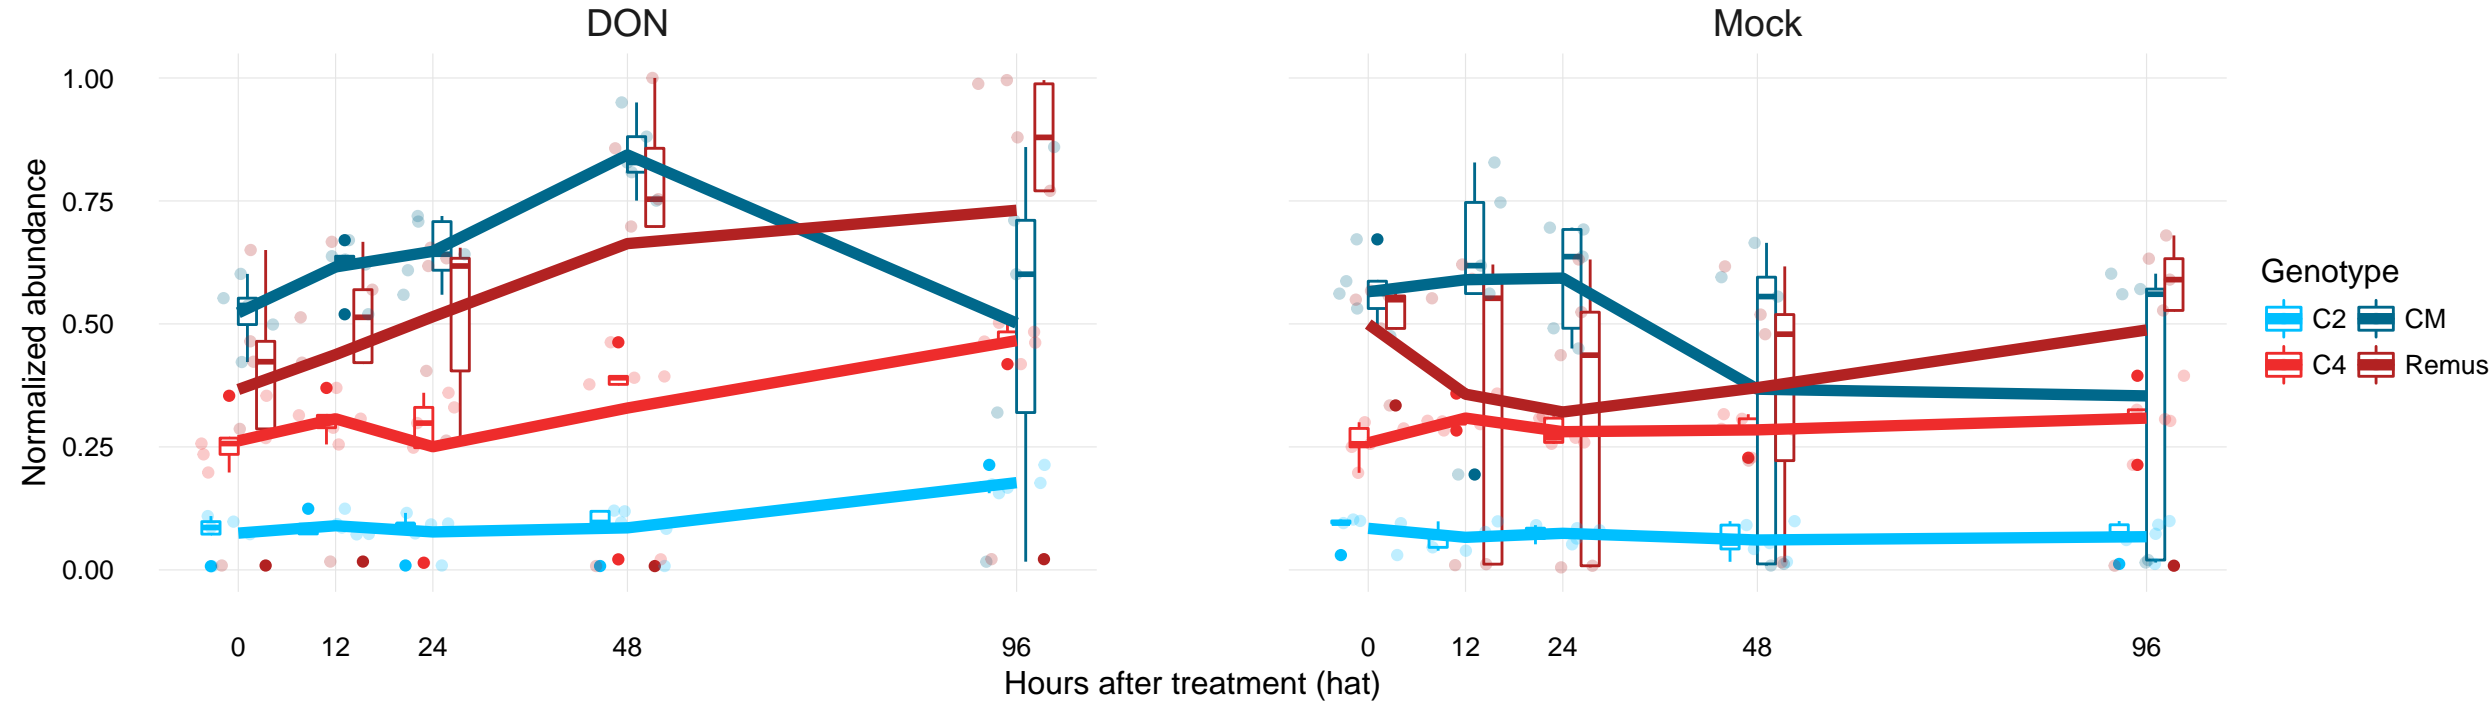

# A.68

Annotated as Flavonoid or others (GlcF)  
(3 database hits)

|                |                                                |
|----------------|------------------------------------------------|
| MZ             | 559.1784                                       |
| RT             | 13.27 min                                      |
| Normalization  | Indirectly via surrogate<br>in the KPX samples |
| Cluster        | –                                              |
| Cn total / Phe | 26 /                                           |

## C2, C4; different treatments

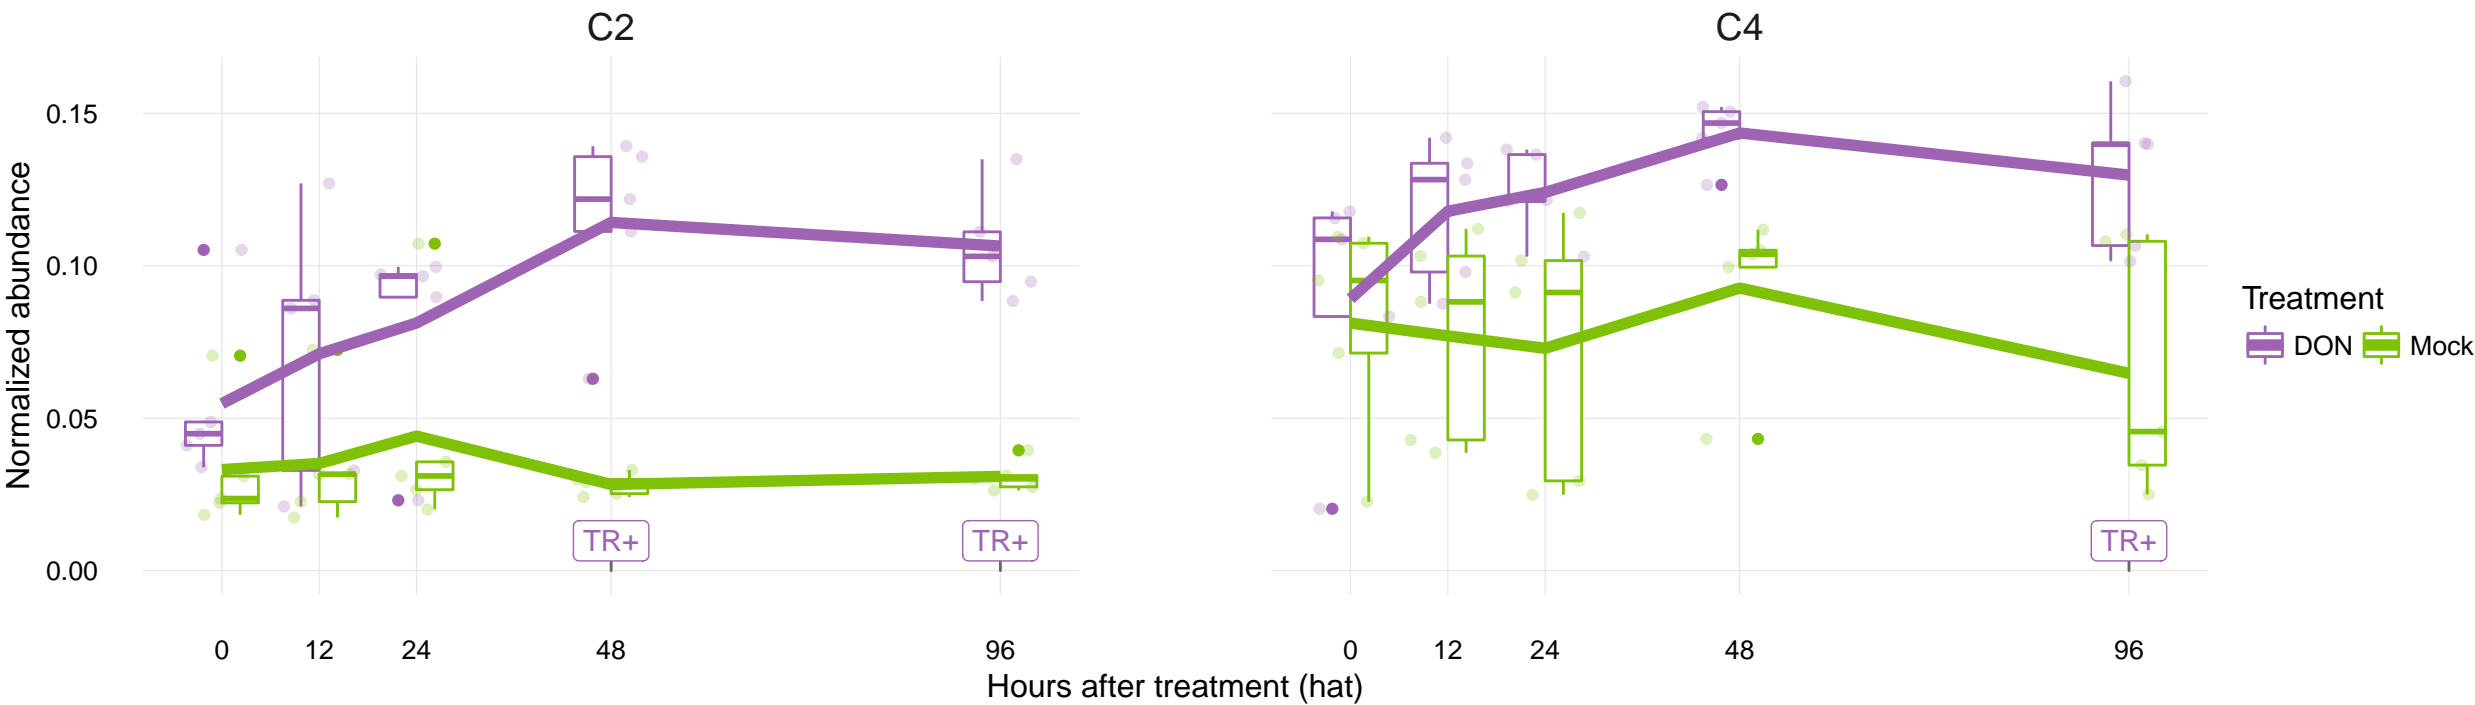

## DON, Mock; different genotypes

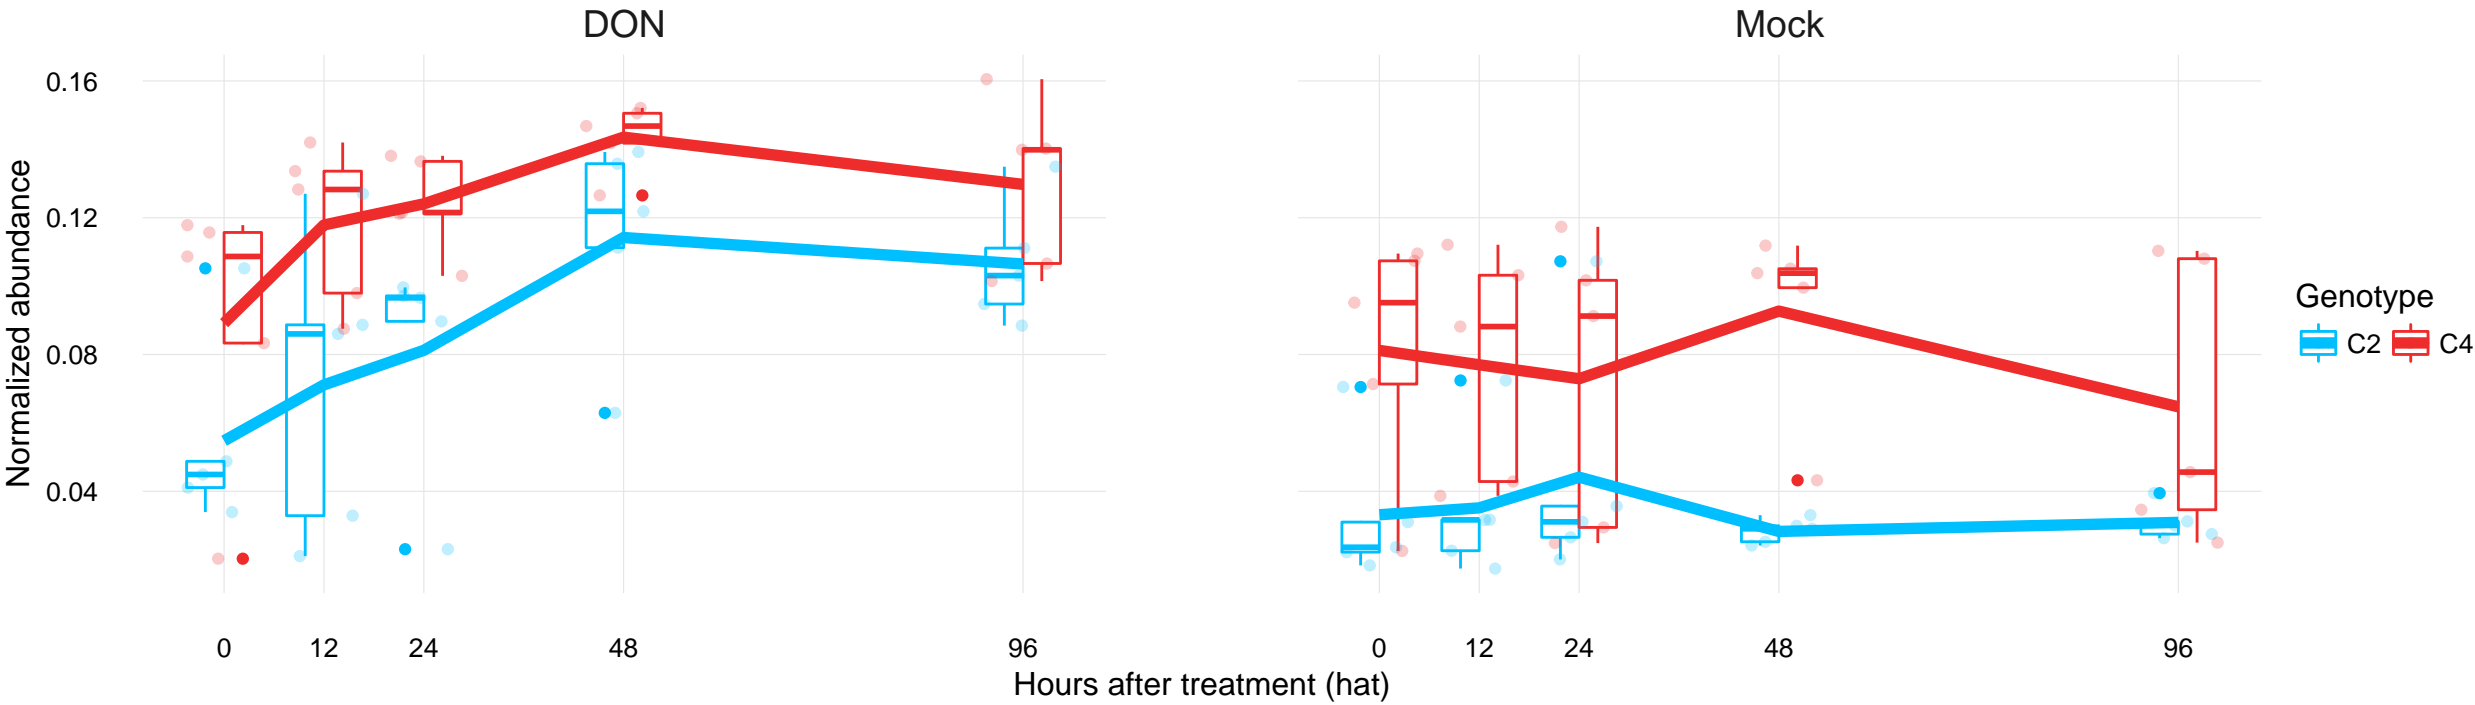

## CM, Remus; different treatments

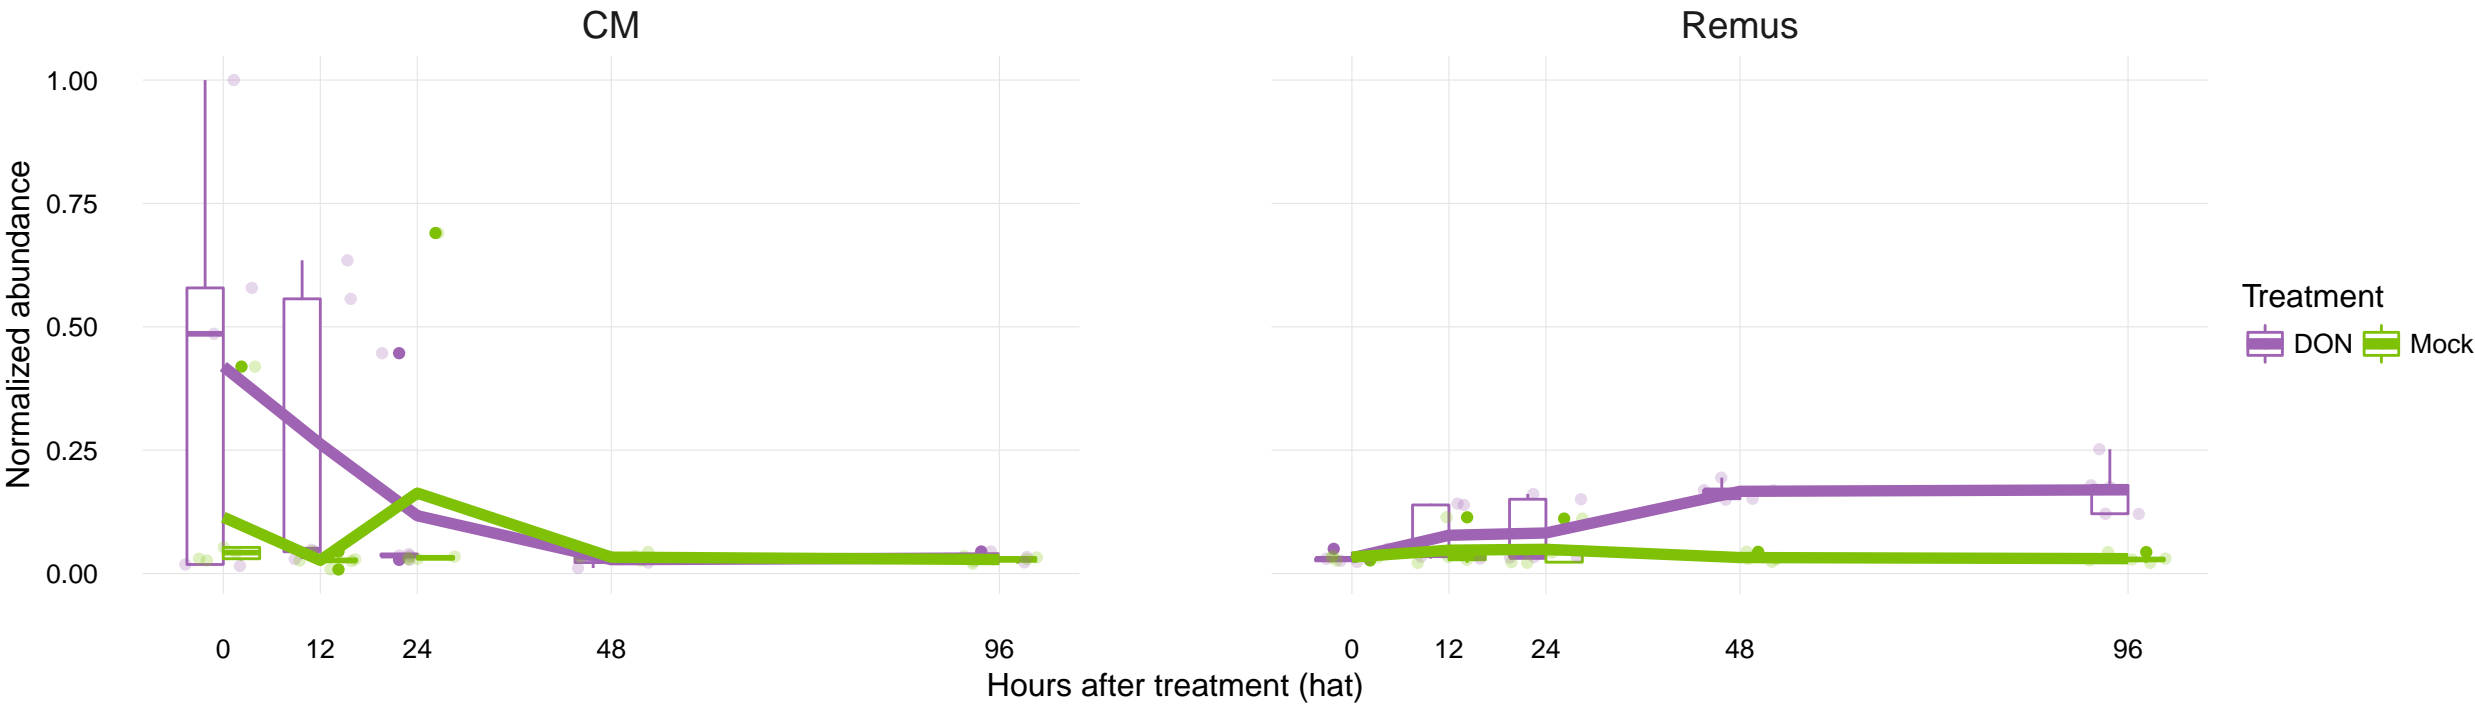

## DON, Mock; all four genotypes

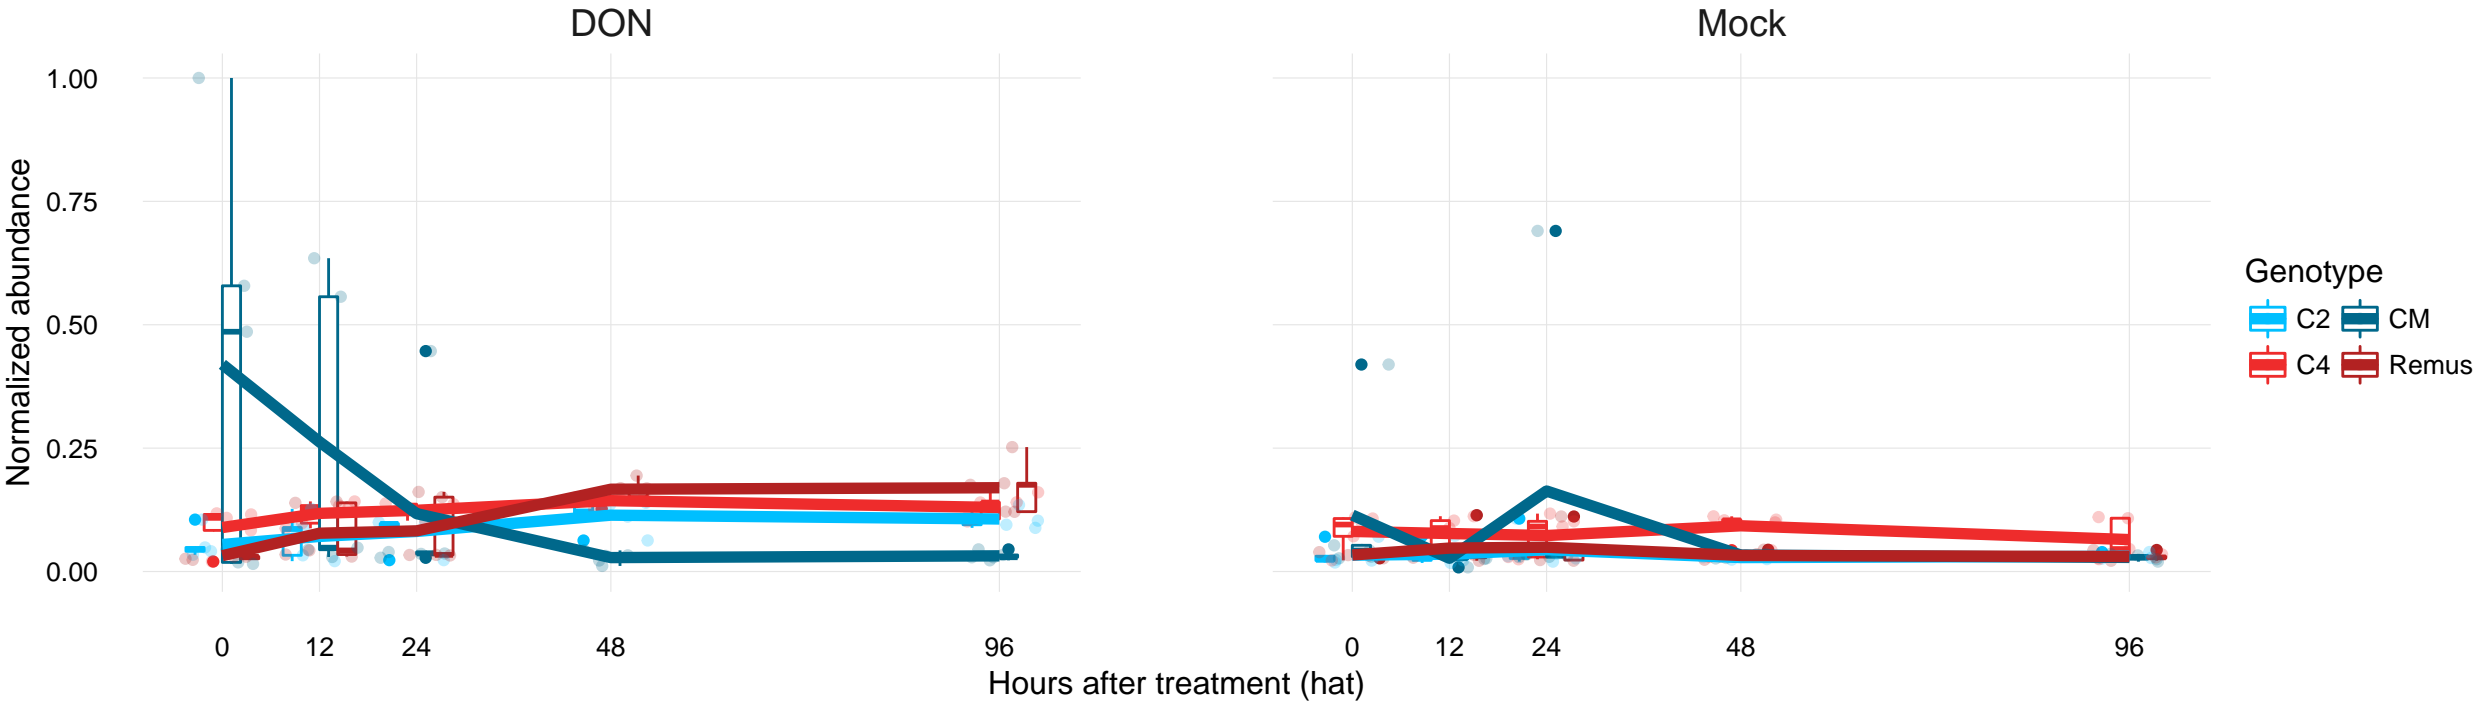

# Trimethyltricetin

Identified metabolite (level 1)

|                |                          |
|----------------|--------------------------|
| MZ             | 345.097                  |
| RT             | 24.01 min                |
| Normalization  | Directly via KPX samples |
| Cluster        | –                        |
| Cn total / Phe | 18 /                     |

C2, C4; different treatments

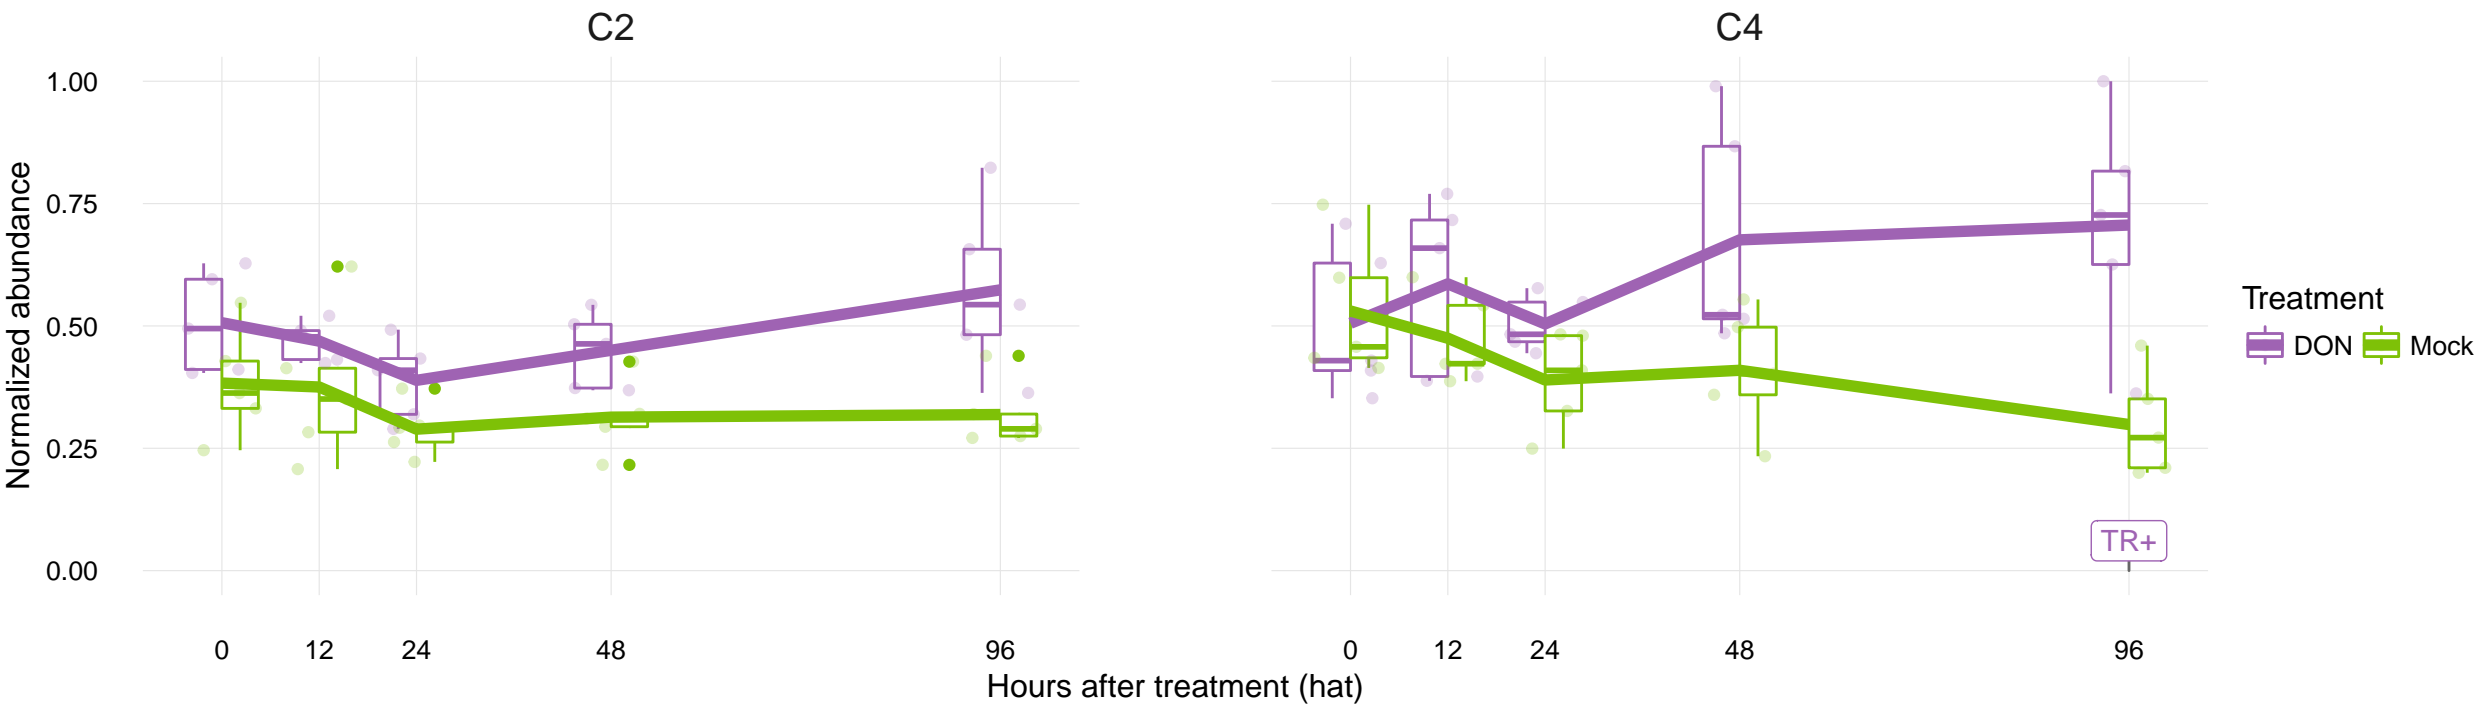

DON, Mock; different genotypes

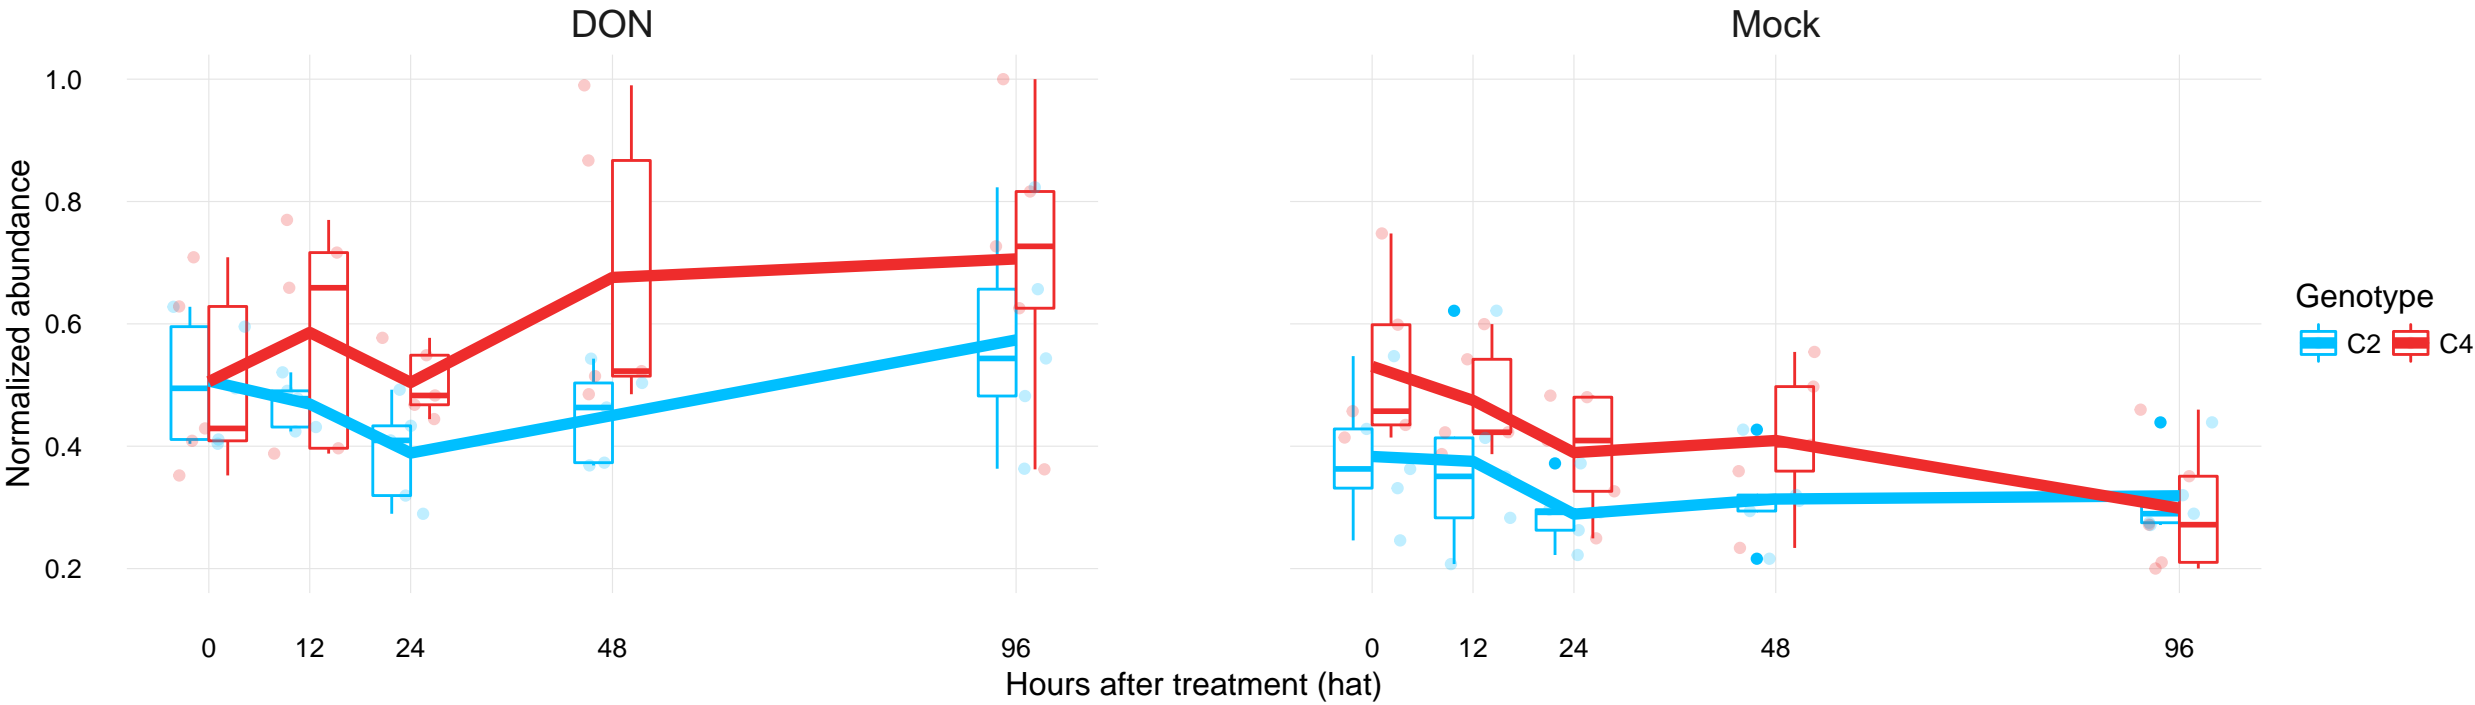

CM, Remus; different treatments

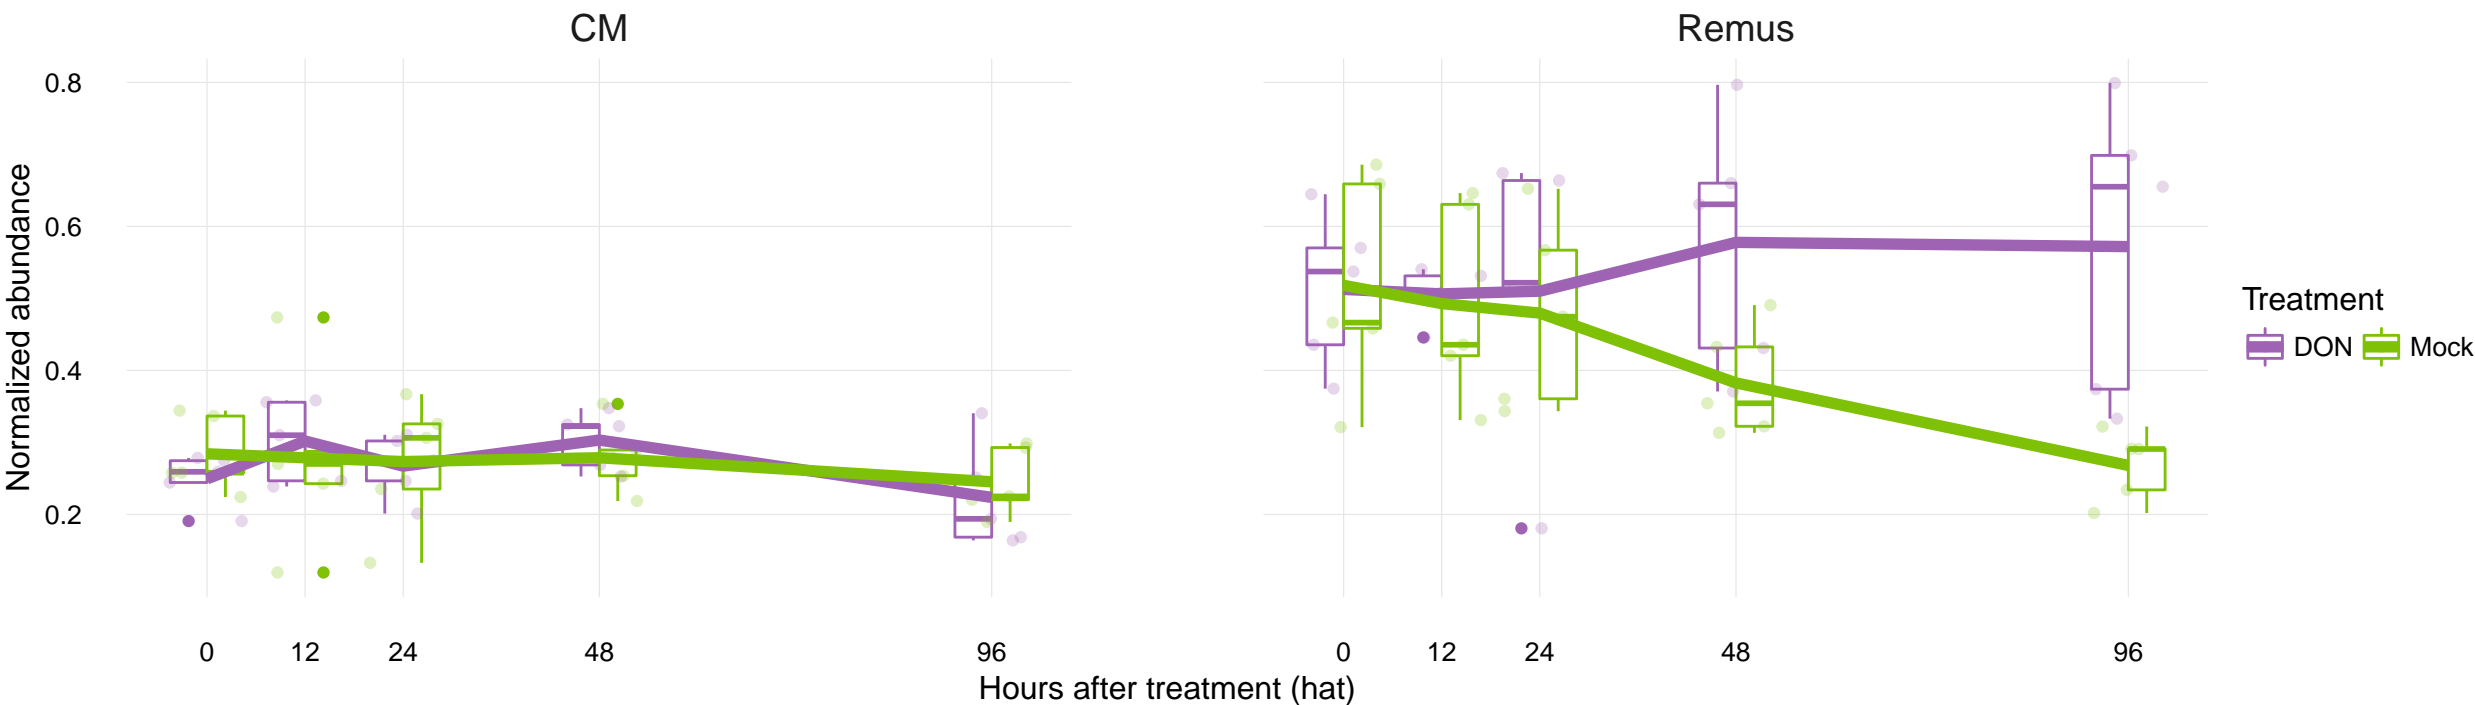

DON, Mock; all four genotypes

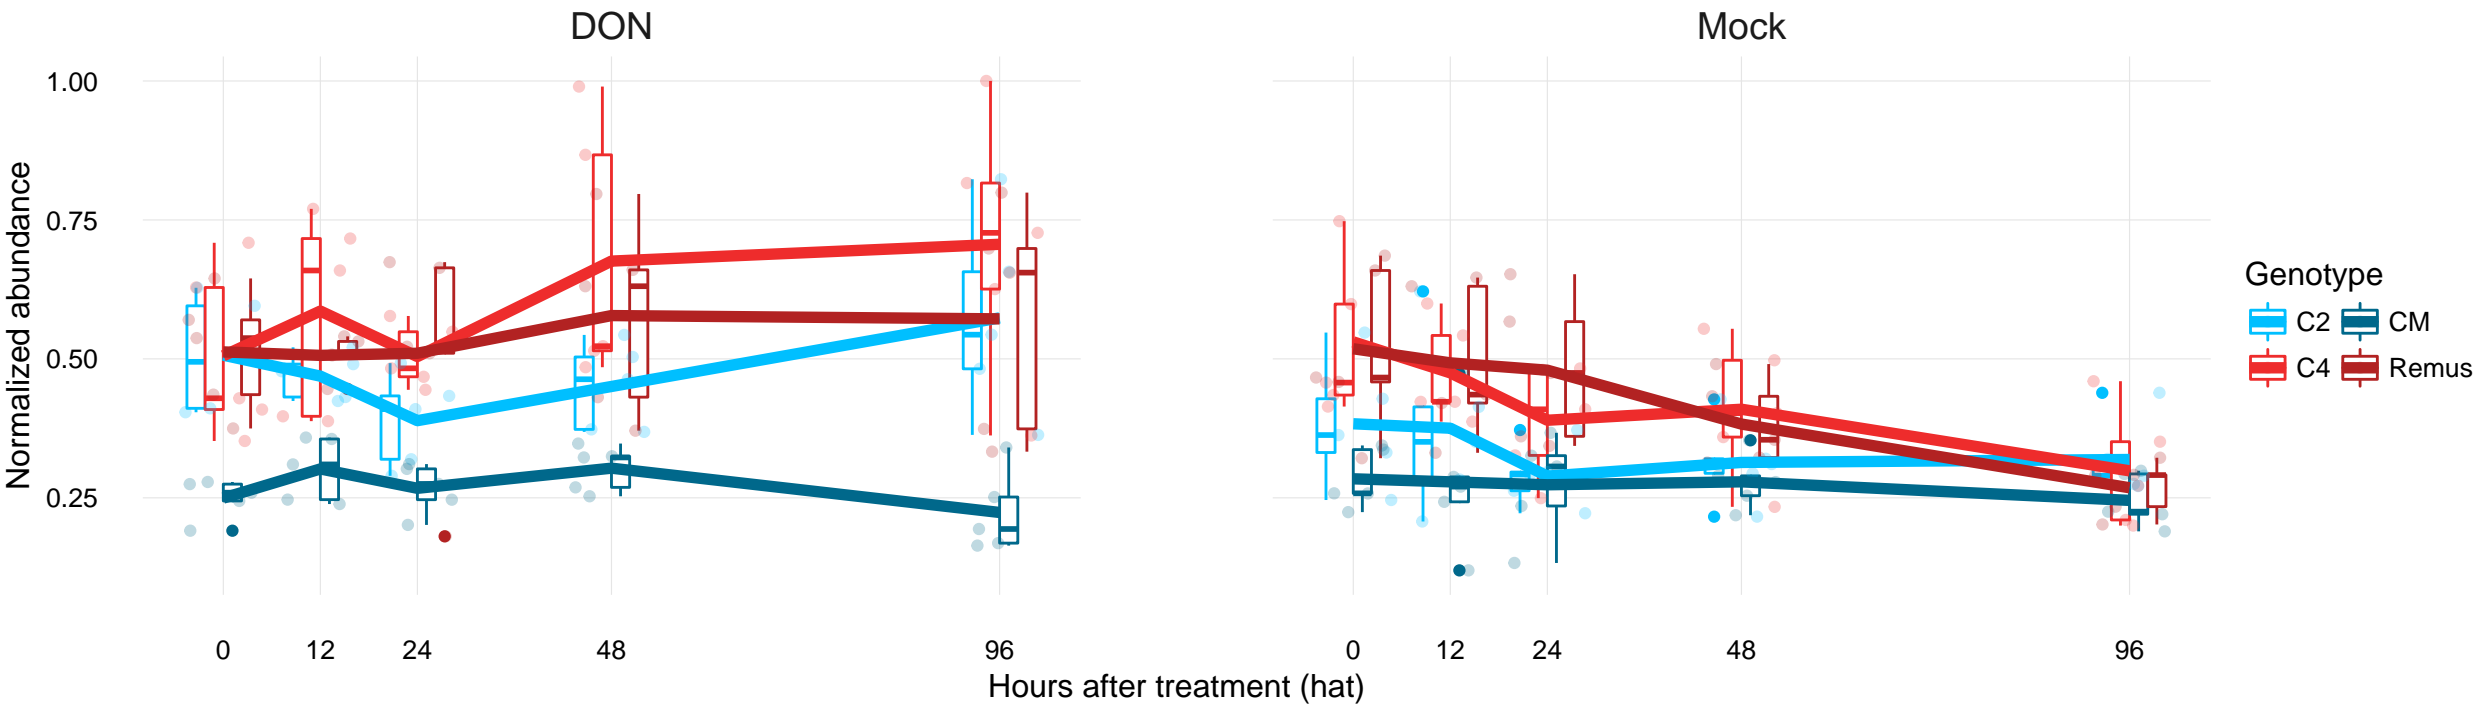

# A.93

Annotated as Flavonoid (diGlcF)  
(10 database hits)

|                |                          |
|----------------|--------------------------|
| MZ             | 640.2237                 |
| RT             | 15.8 min                 |
| Normalization  | Directly via KPX samples |
| Cluster        | –                        |
| Cn total / Phe | 29 / 9                   |

## C2, C4; different treatments

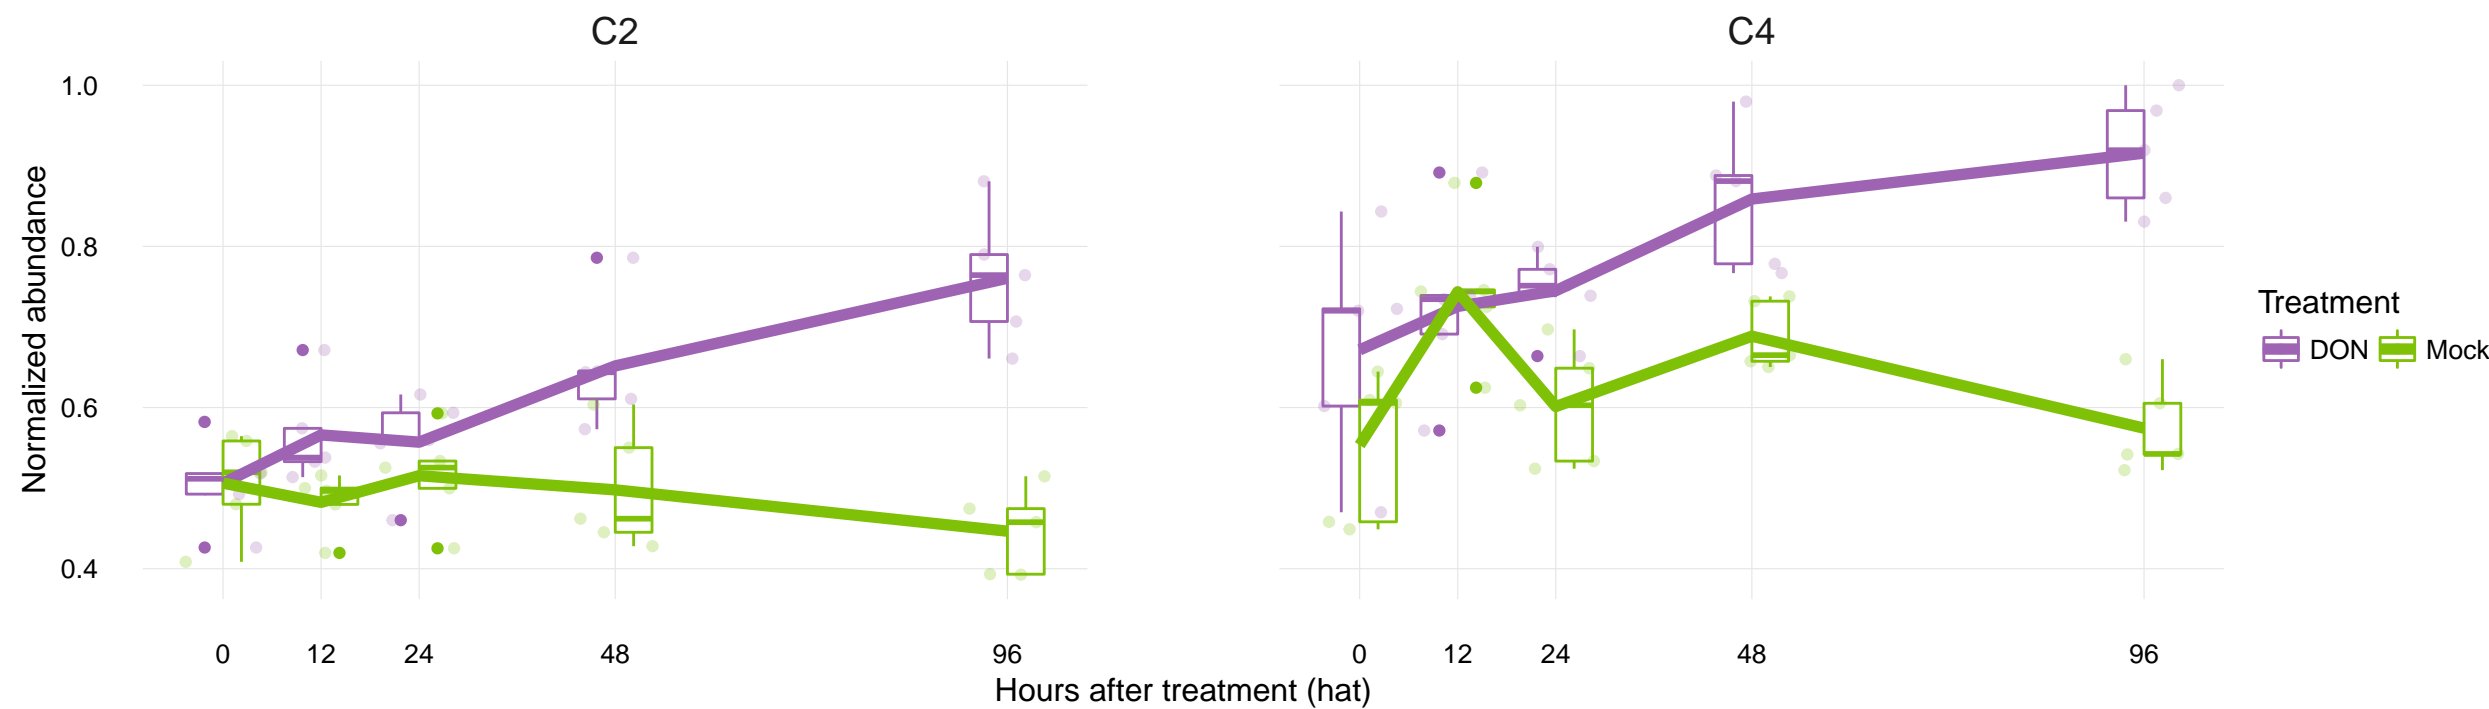

## DON, Mock; different genotypes

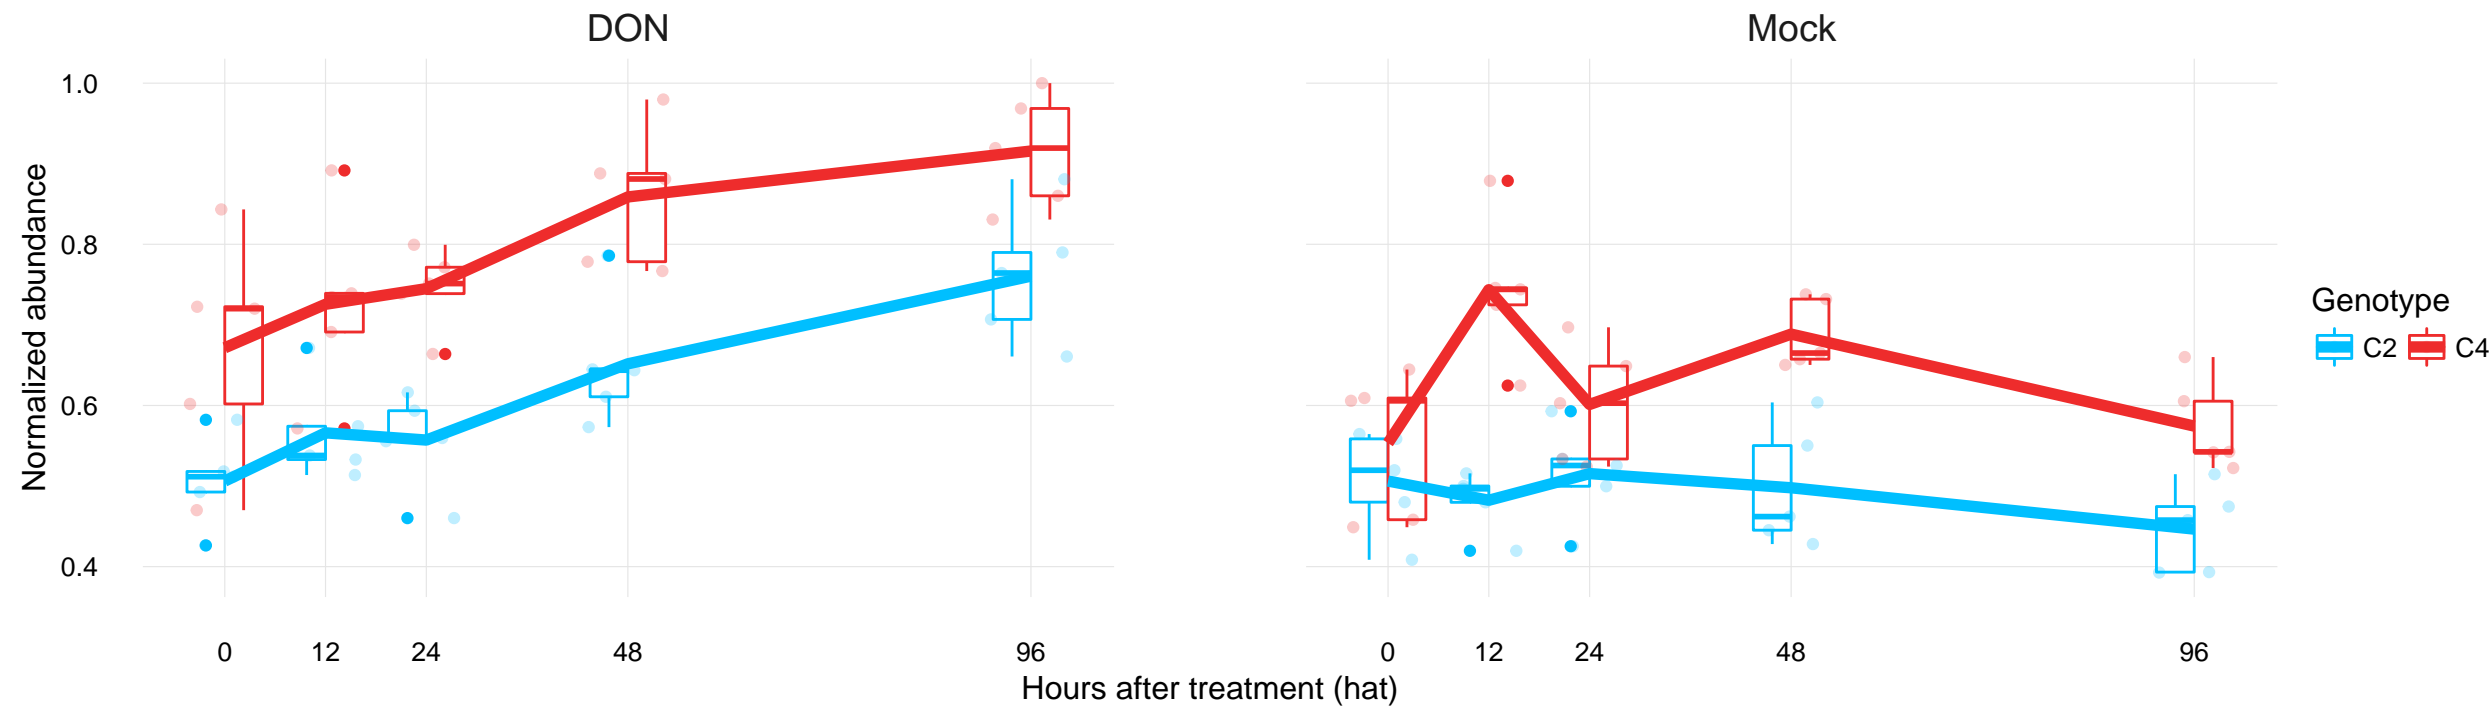

## CM, Remus; different treatments

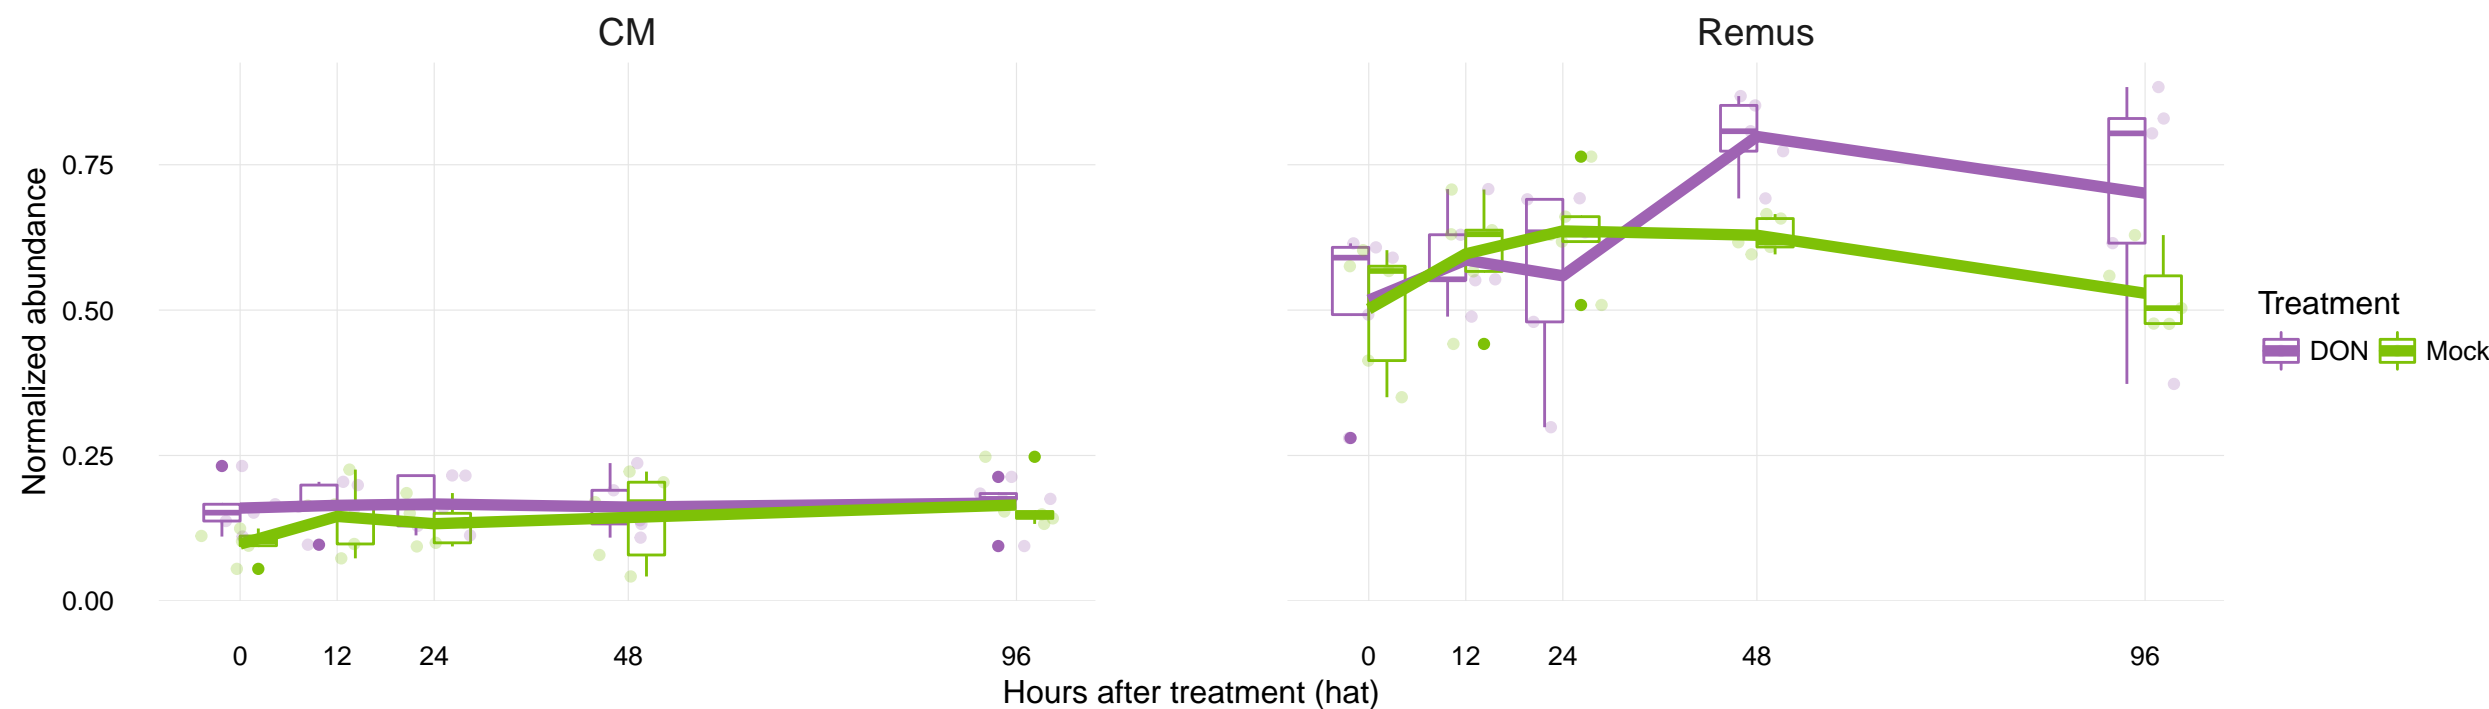

## DON, Mock; all four genotypes

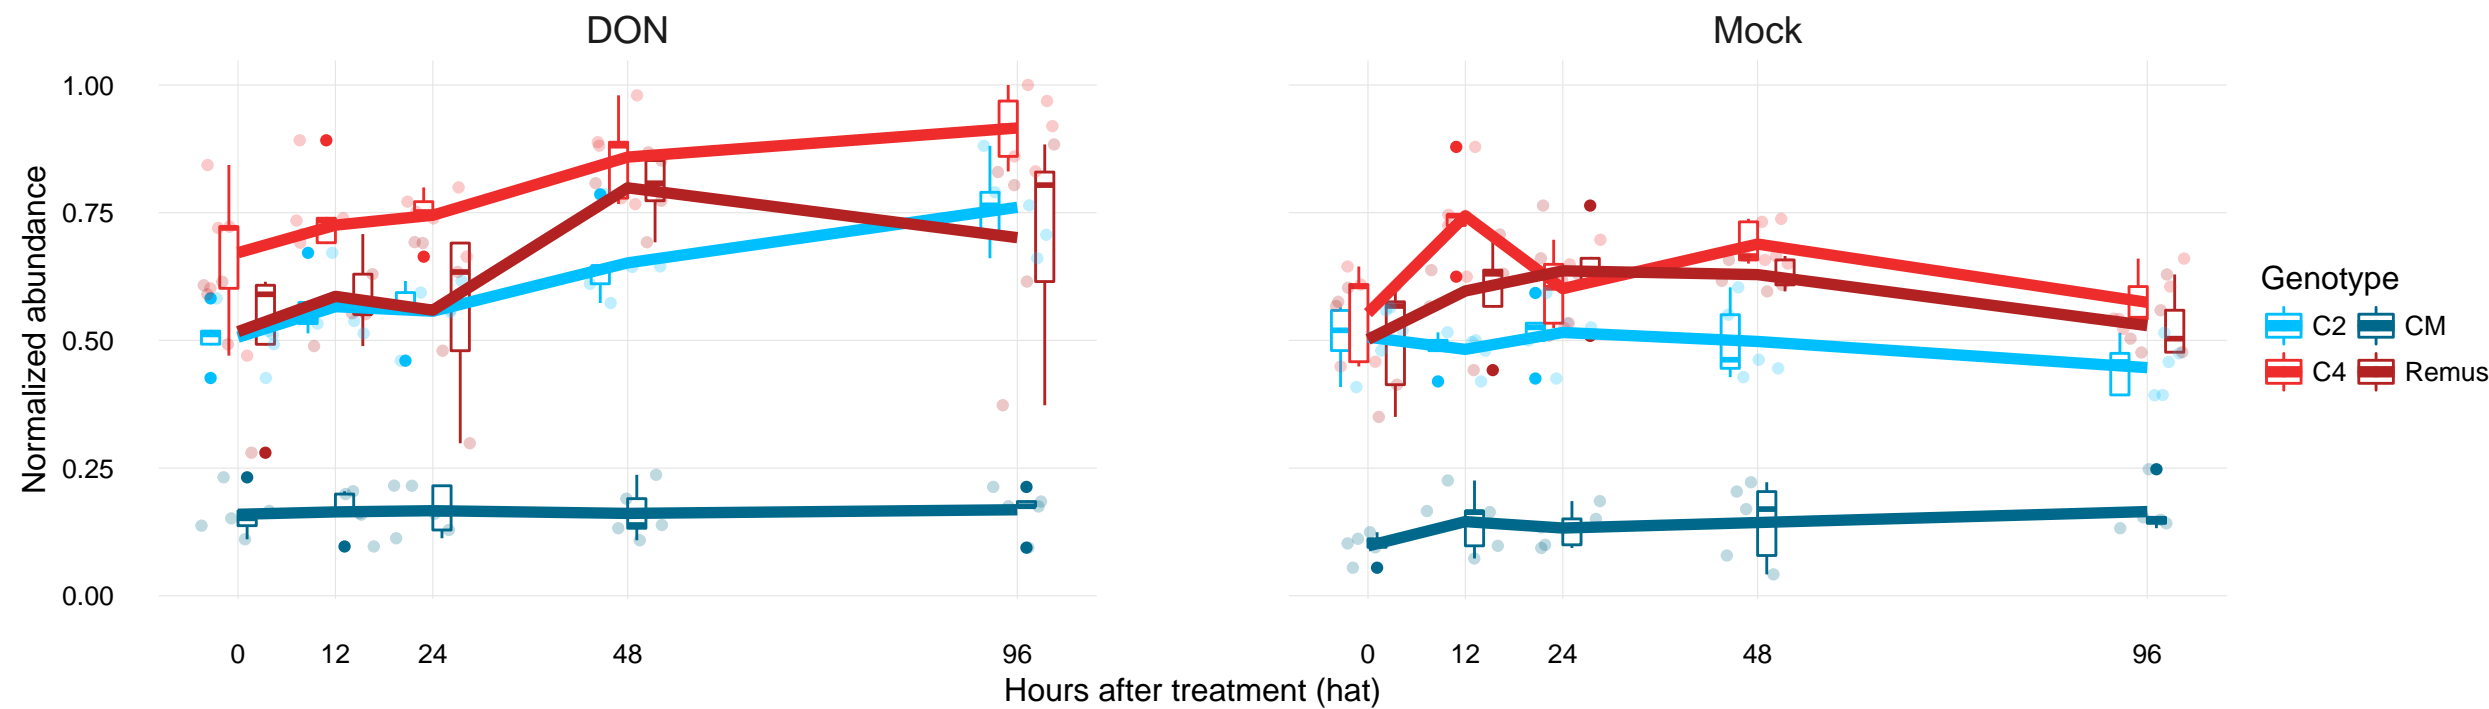

# A.53

Annotated as HCA derivative  
(1 database hit)

|                |                          |
|----------------|--------------------------|
| MZ             | 415.1238                 |
| RT             | 12.26 min                |
| Normalization  | Directly via KPX samples |
| Cluster        | –                        |
| Cn total / Phe | 18 / 9                   |

## C2, C4; different treatments

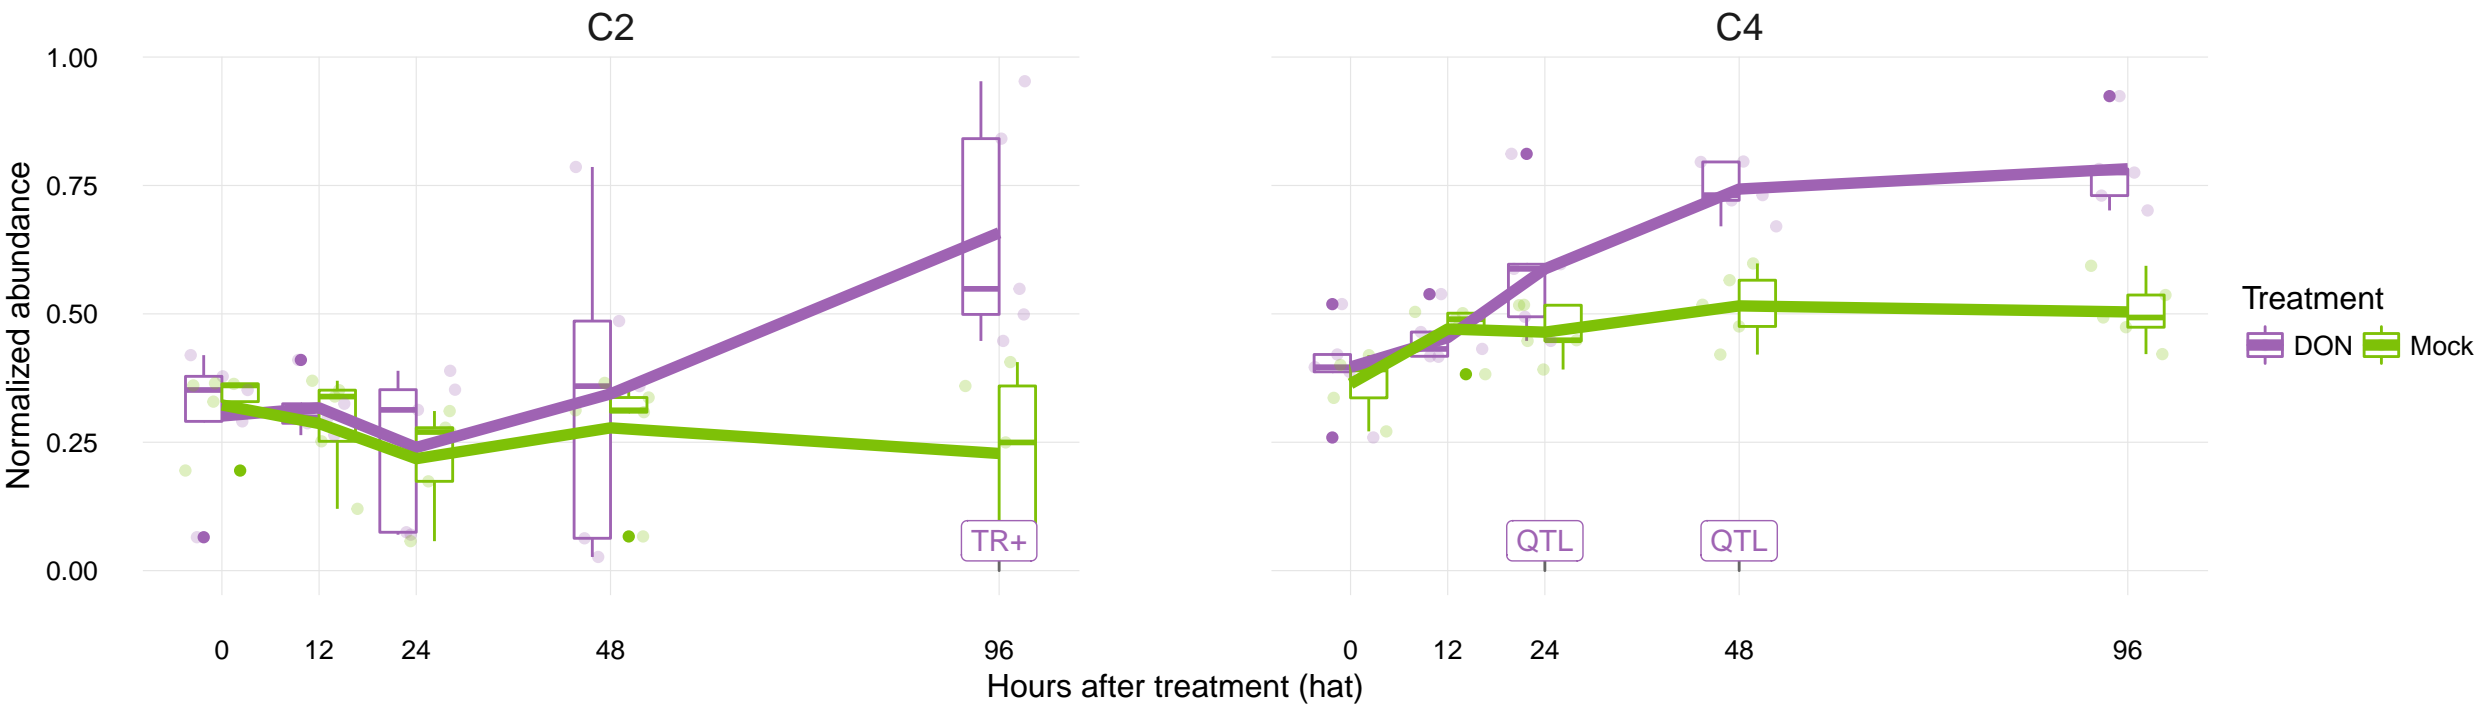

## DON, Mock; different genotypes

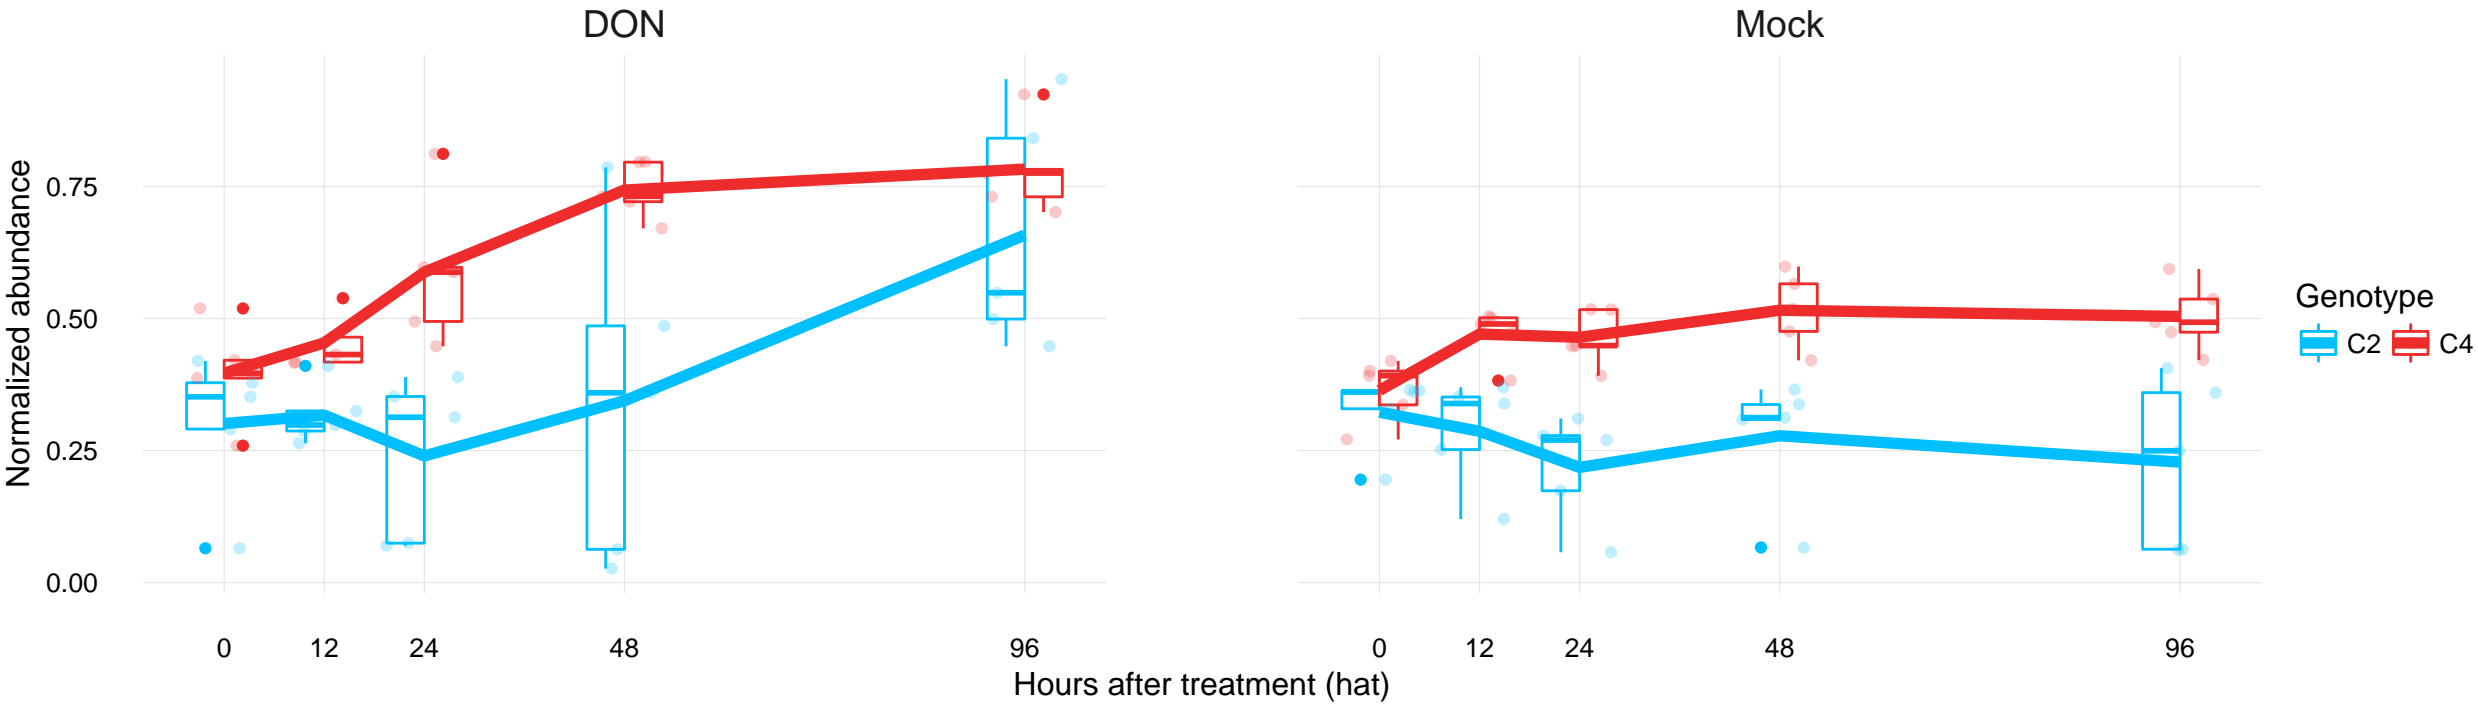

## CM, Remus; different treatments

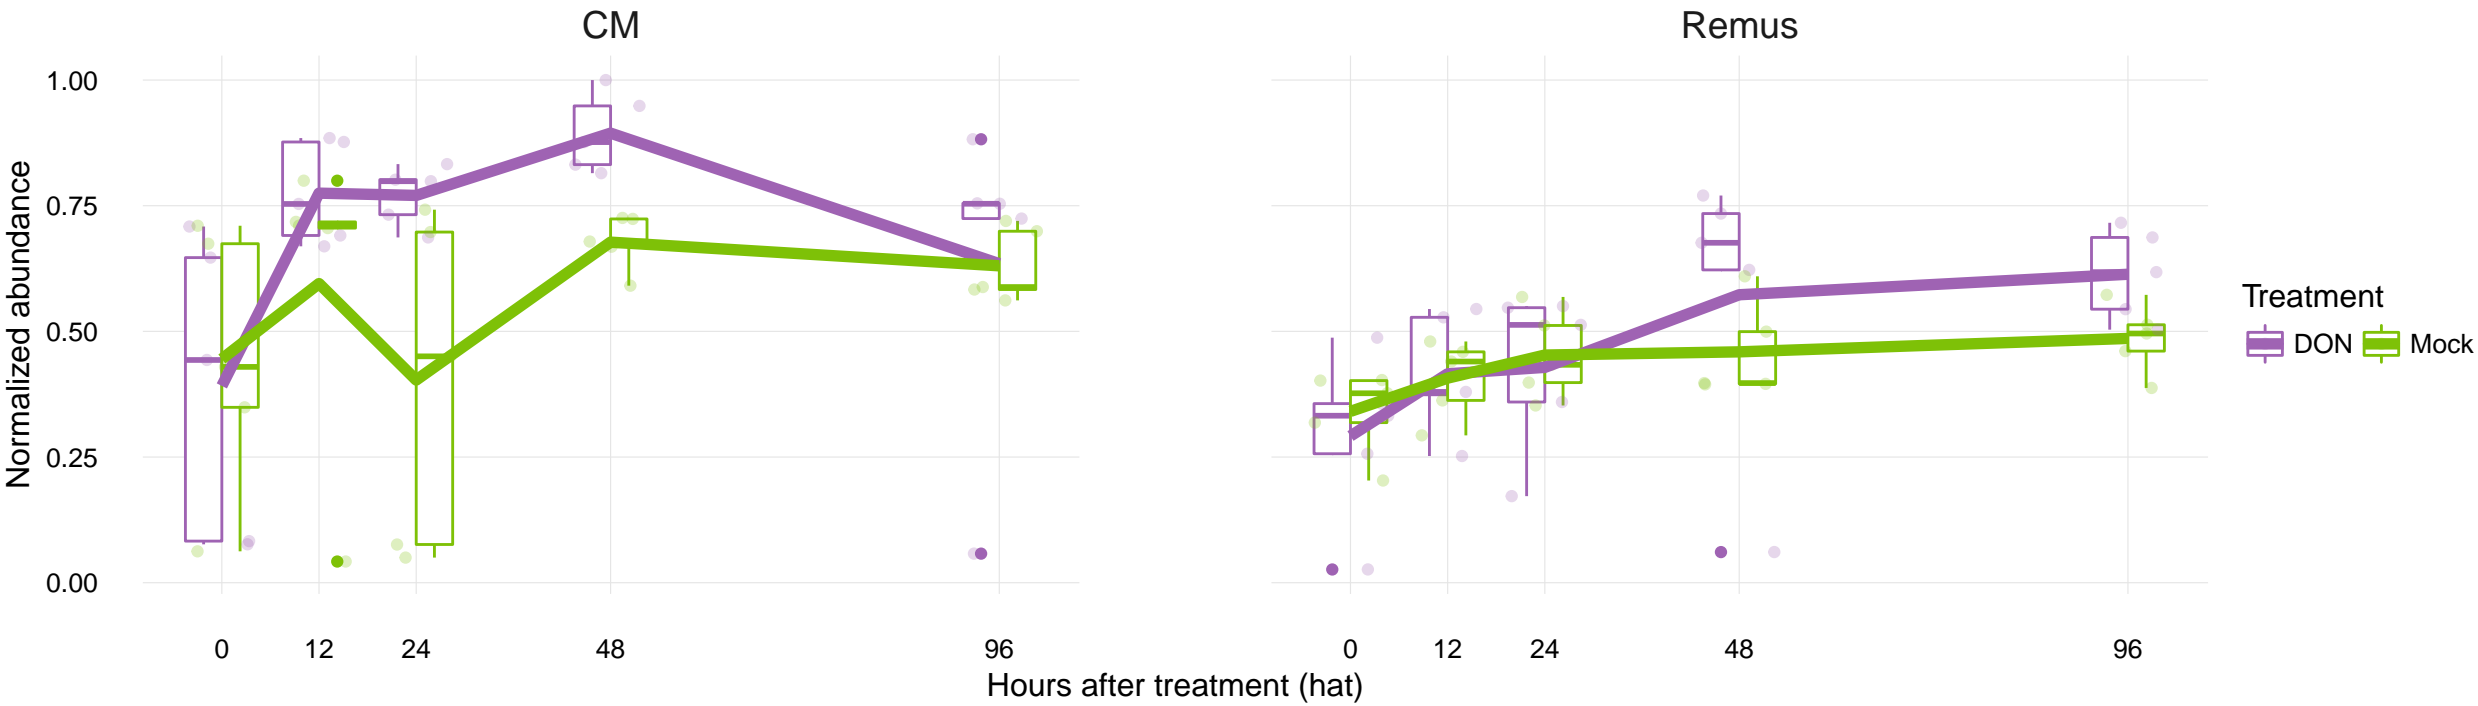

## DON, Mock; all four genotypes

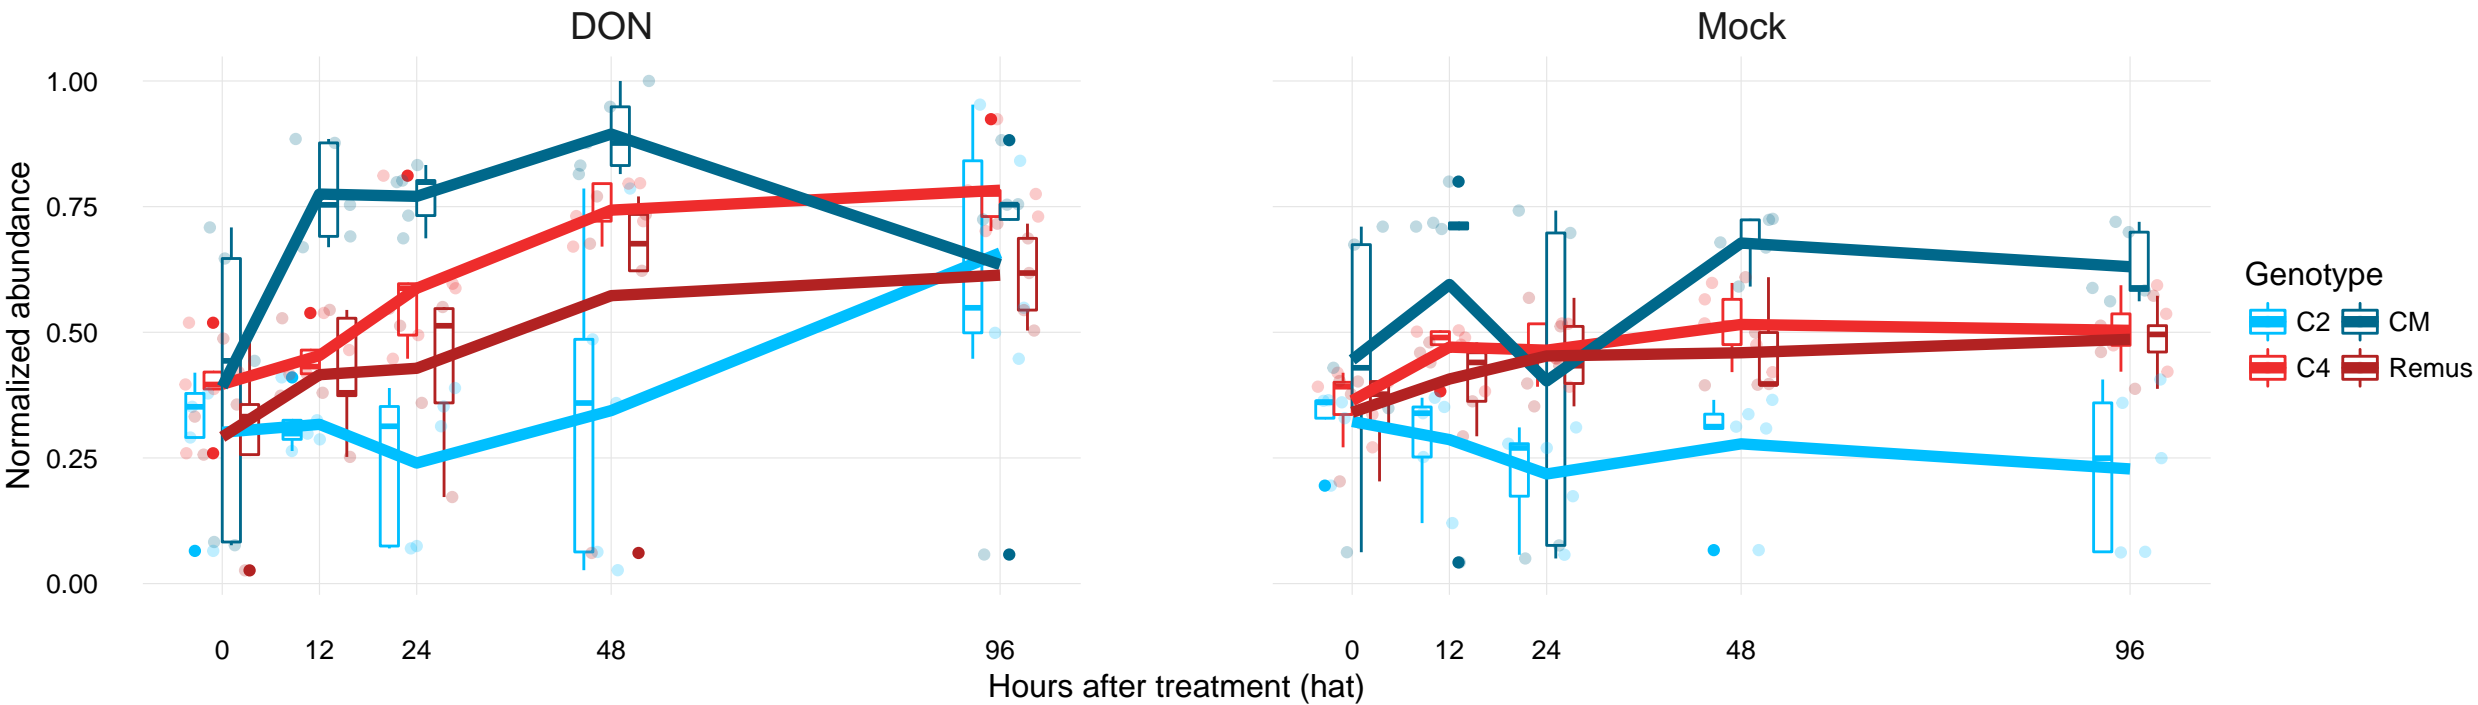

A.77

Annotated as HCA derivative  
(1 database hit)

|                |                          |
|----------------|--------------------------|
| MZ             | 251.0915                 |
| RT             | 14.17 min                |
| Normalization  | Directly via KPX samples |
| Cluster        | –                        |
| Cn total / Phe | 13 / 9                   |

C2, C4; different treatments

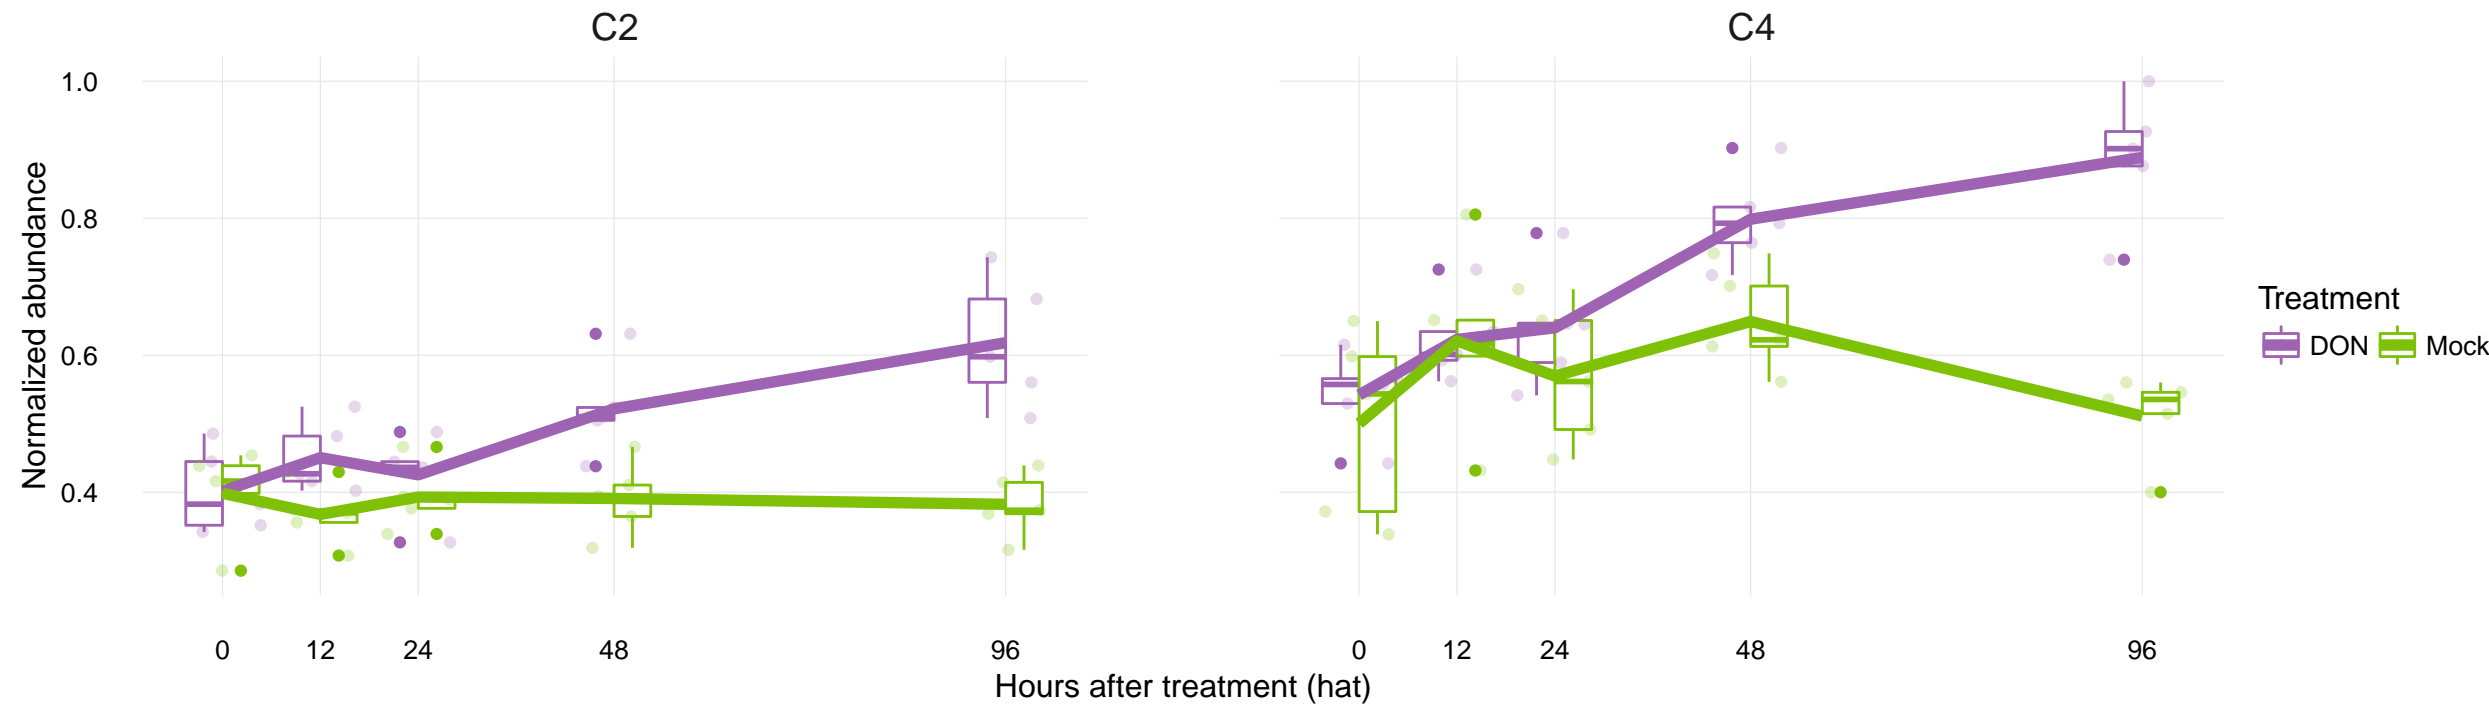

DON, Mock; different genotypes

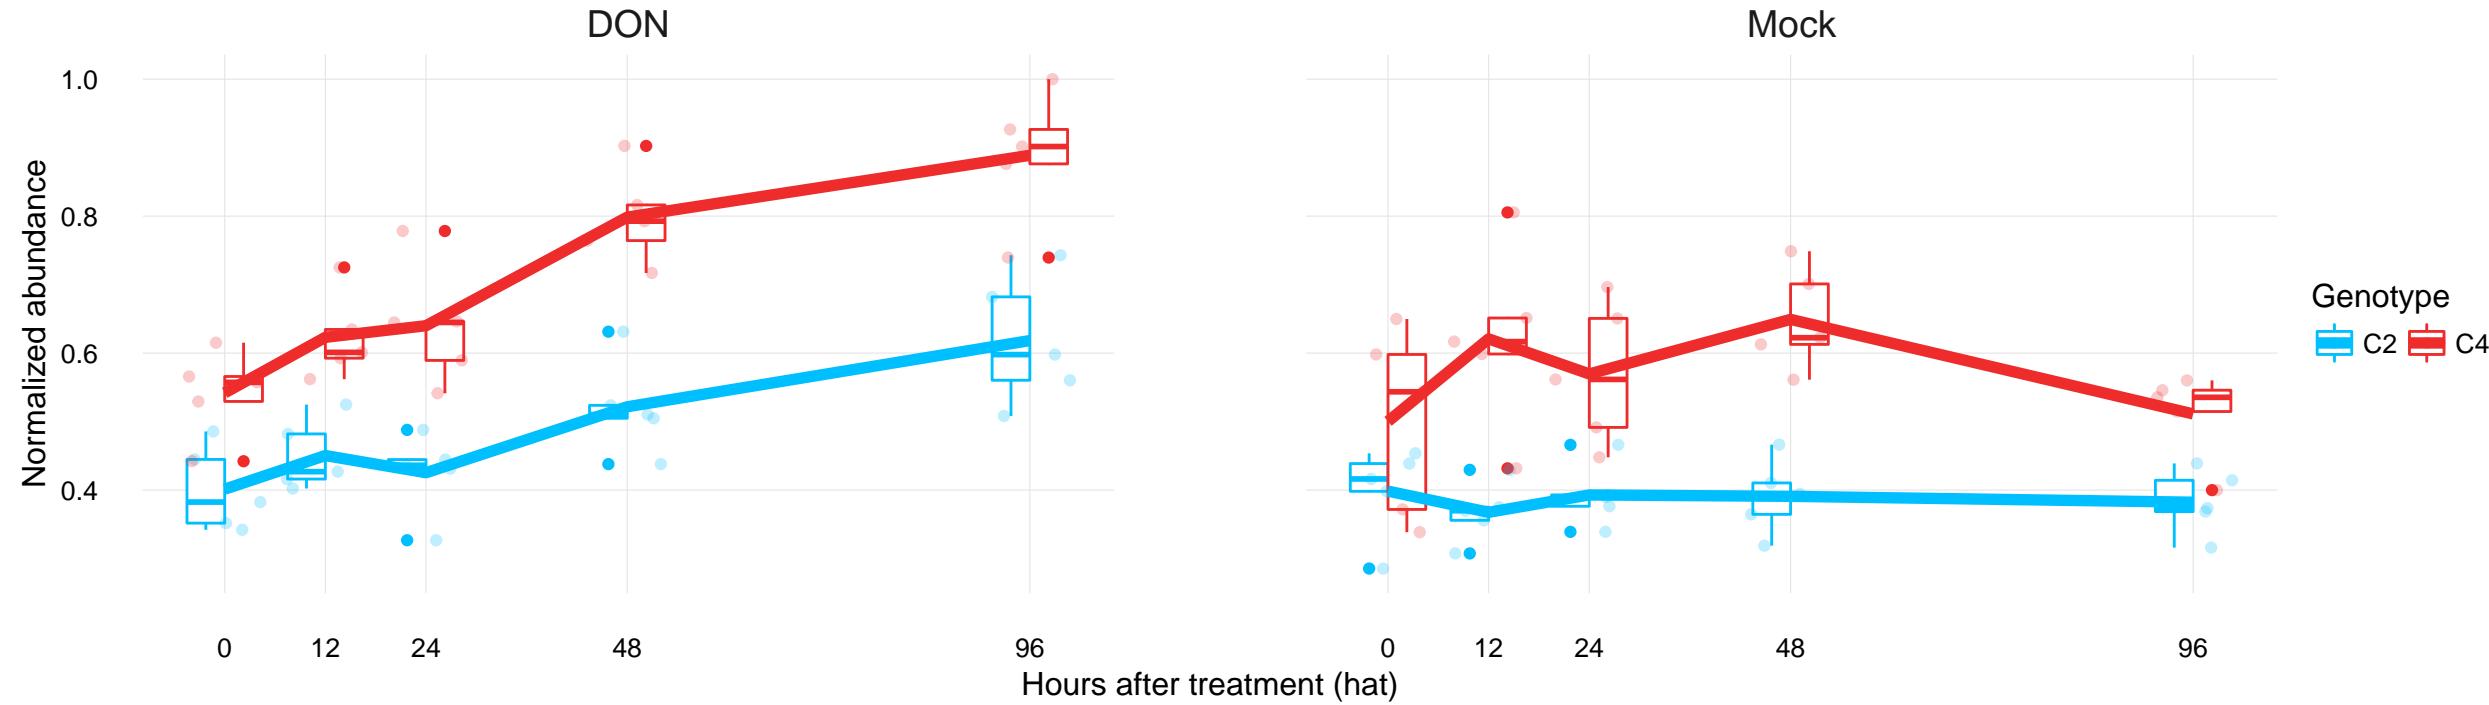

CM, Remus; different treatments

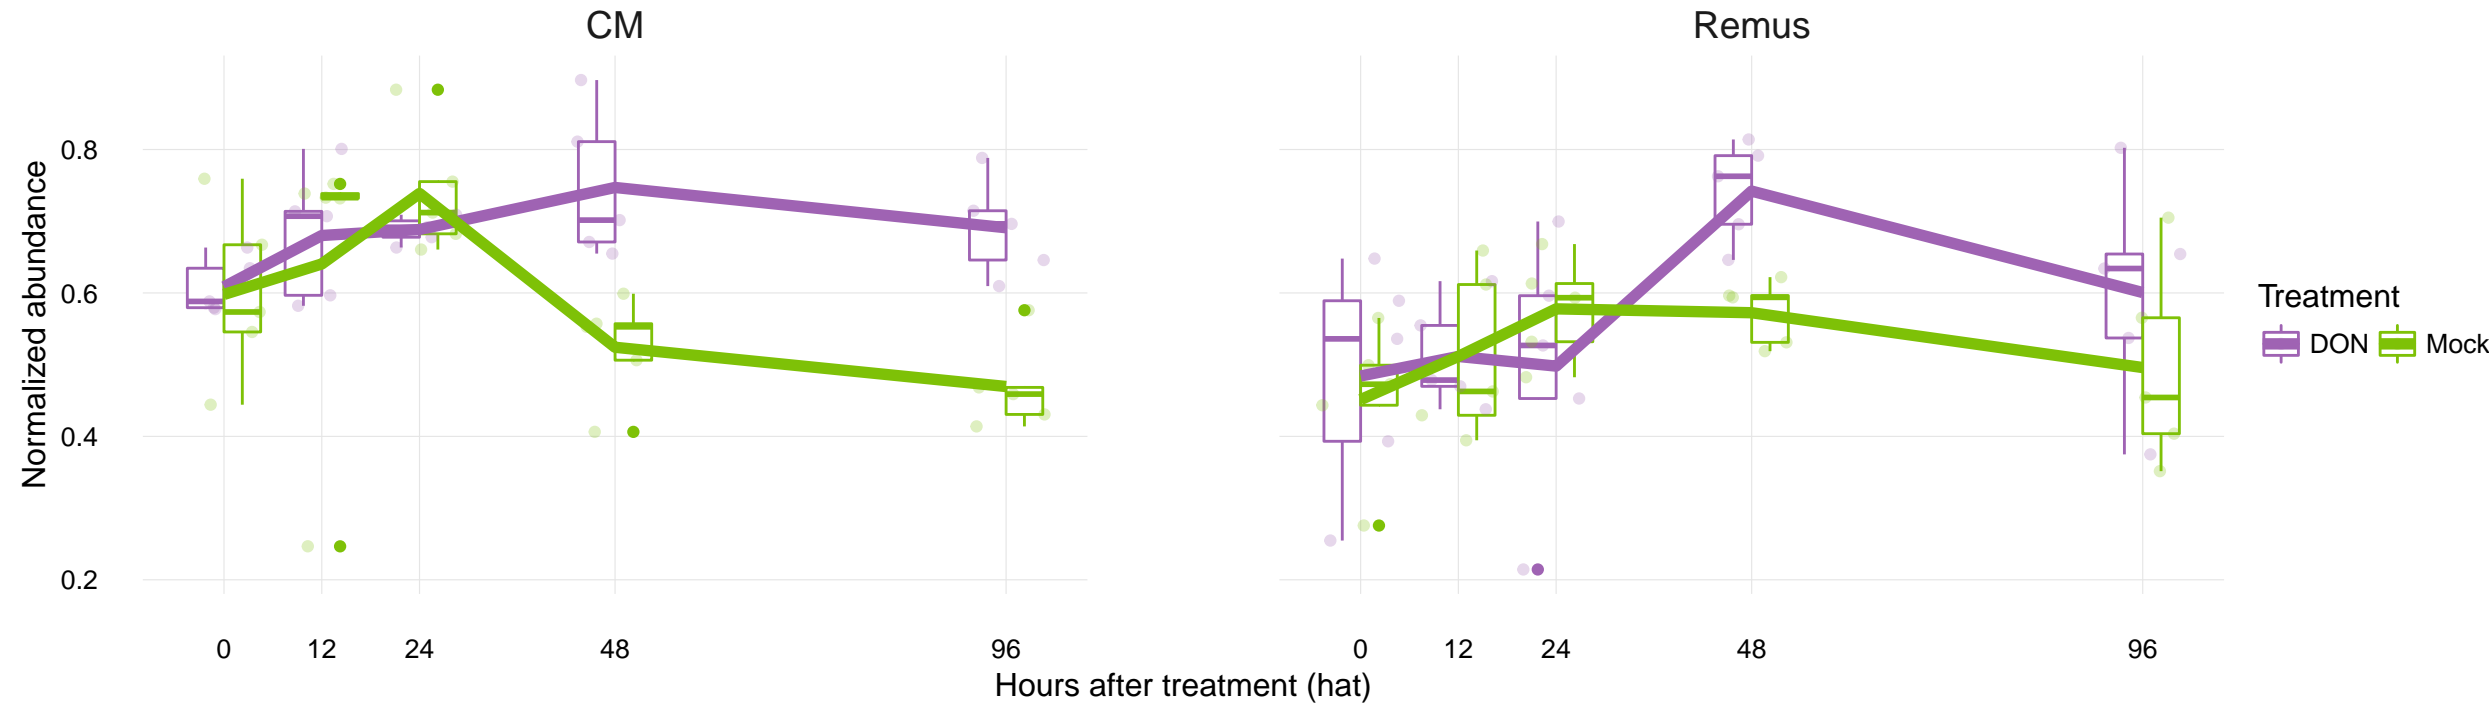

DON, Mock; all four genotypes

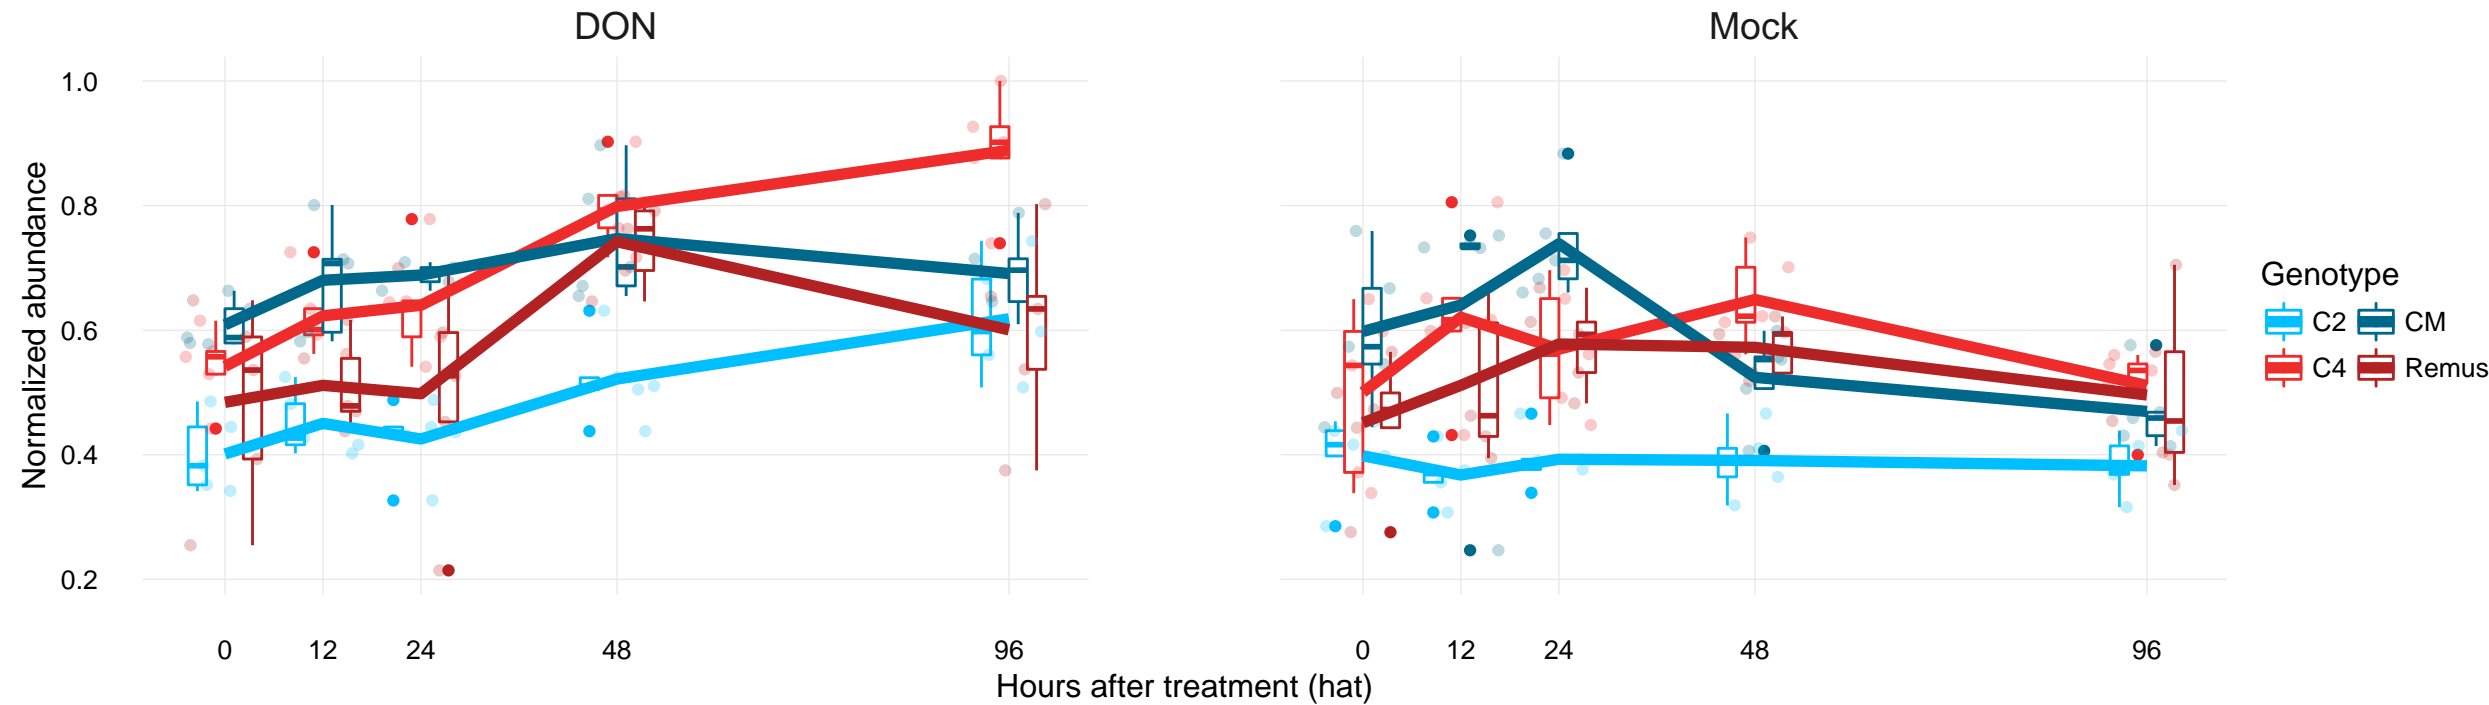



# A.101

Annotated as Lignan  
(1 database hit)

|                |                          |
|----------------|--------------------------|
| MZ             | 601.1893                 |
| RT             | 16.79 min                |
| Normalization  | Directly via KPX samples |
| Cluster        | –                        |
| Cn total / Phe | 28 /                     |

## C2, C4; different treatments

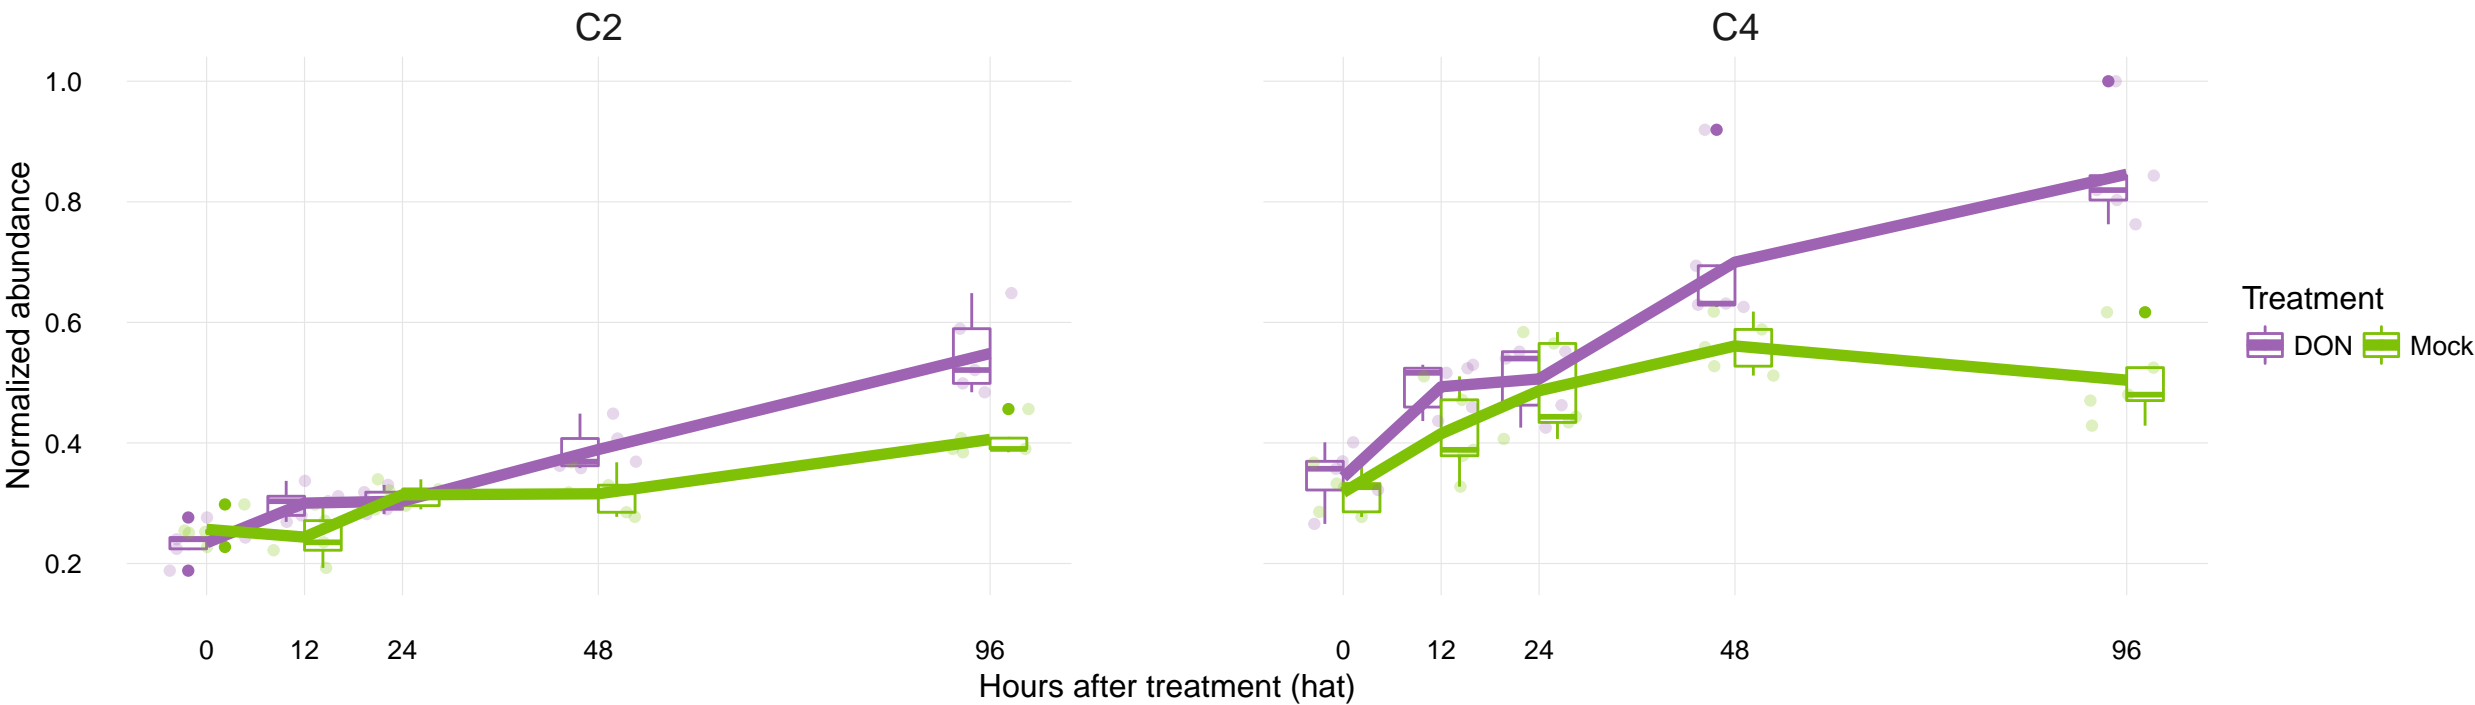

## DON, Mock; different genotypes

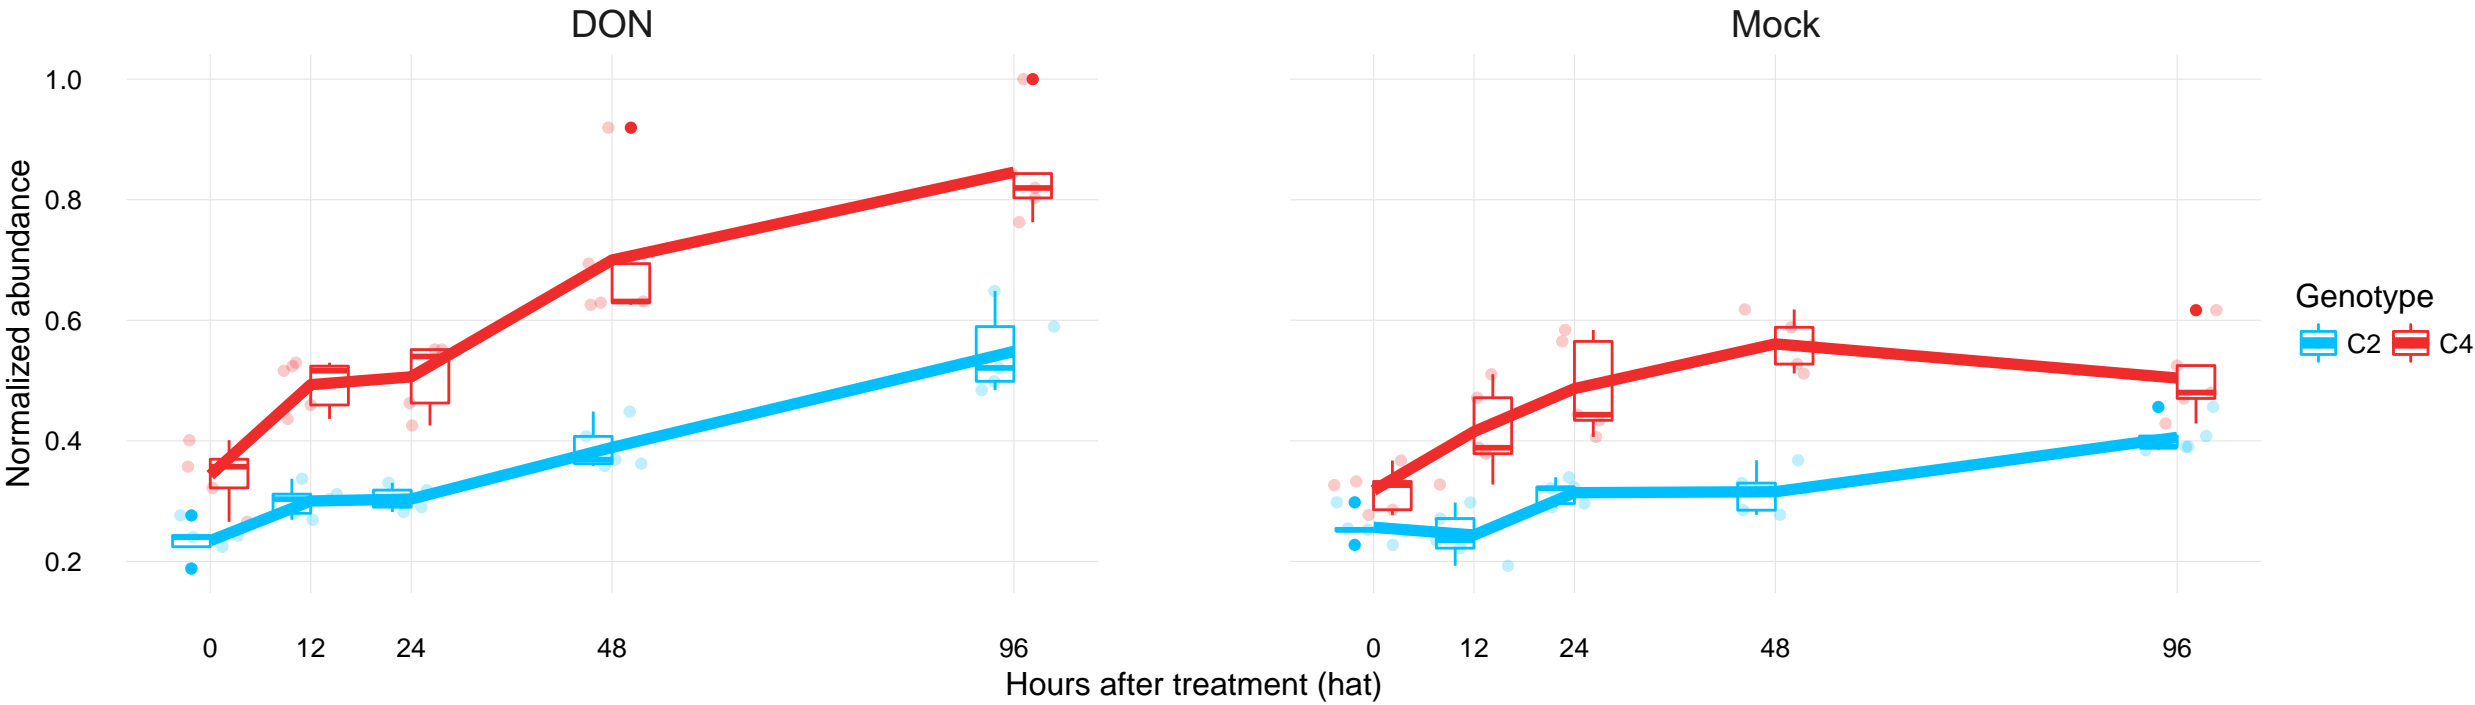

## CM, Remus; different treatments

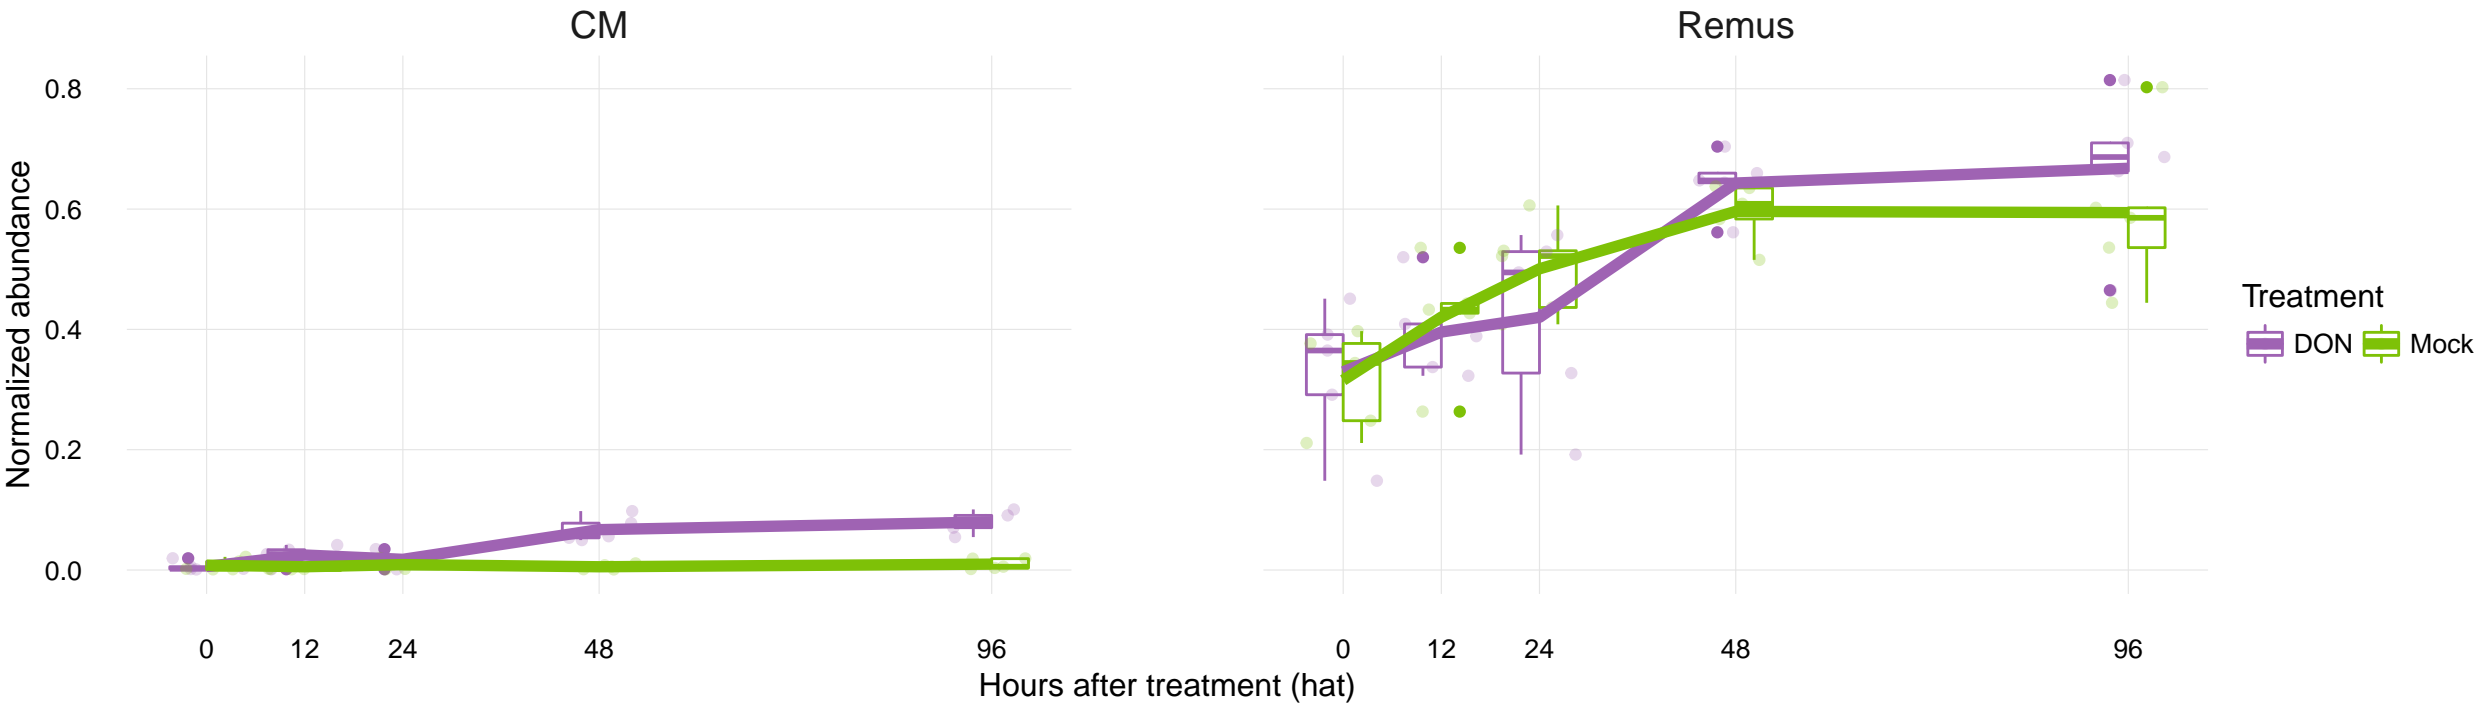

## DON, Mock; all four genotypes

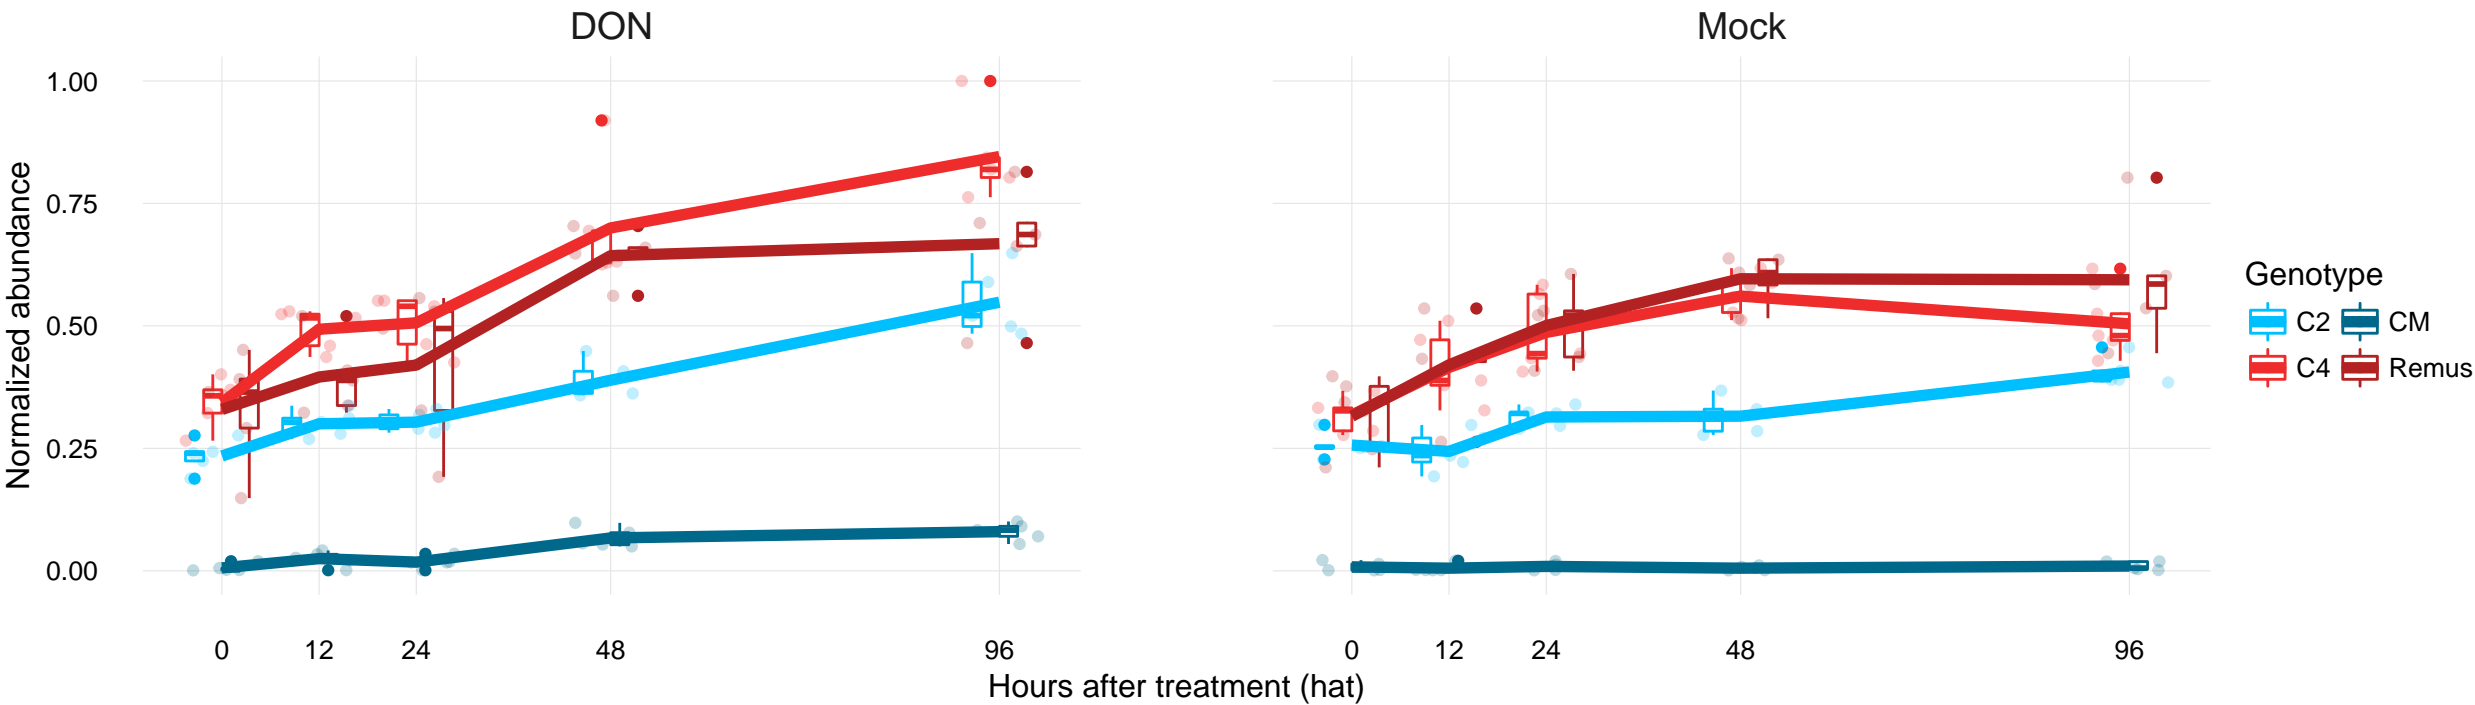



# A.91

Annotated as others (Iridoid)  
(1 database hit)

|                |                          |
|----------------|--------------------------|
| MZ             | 531.1474                 |
| RT             | 15.67 min                |
| Normalization  | Directly via KPX samples |
| Cluster        | –                        |
| Cn total / Phe | 24 /                     |

## C2, C4; different treatments

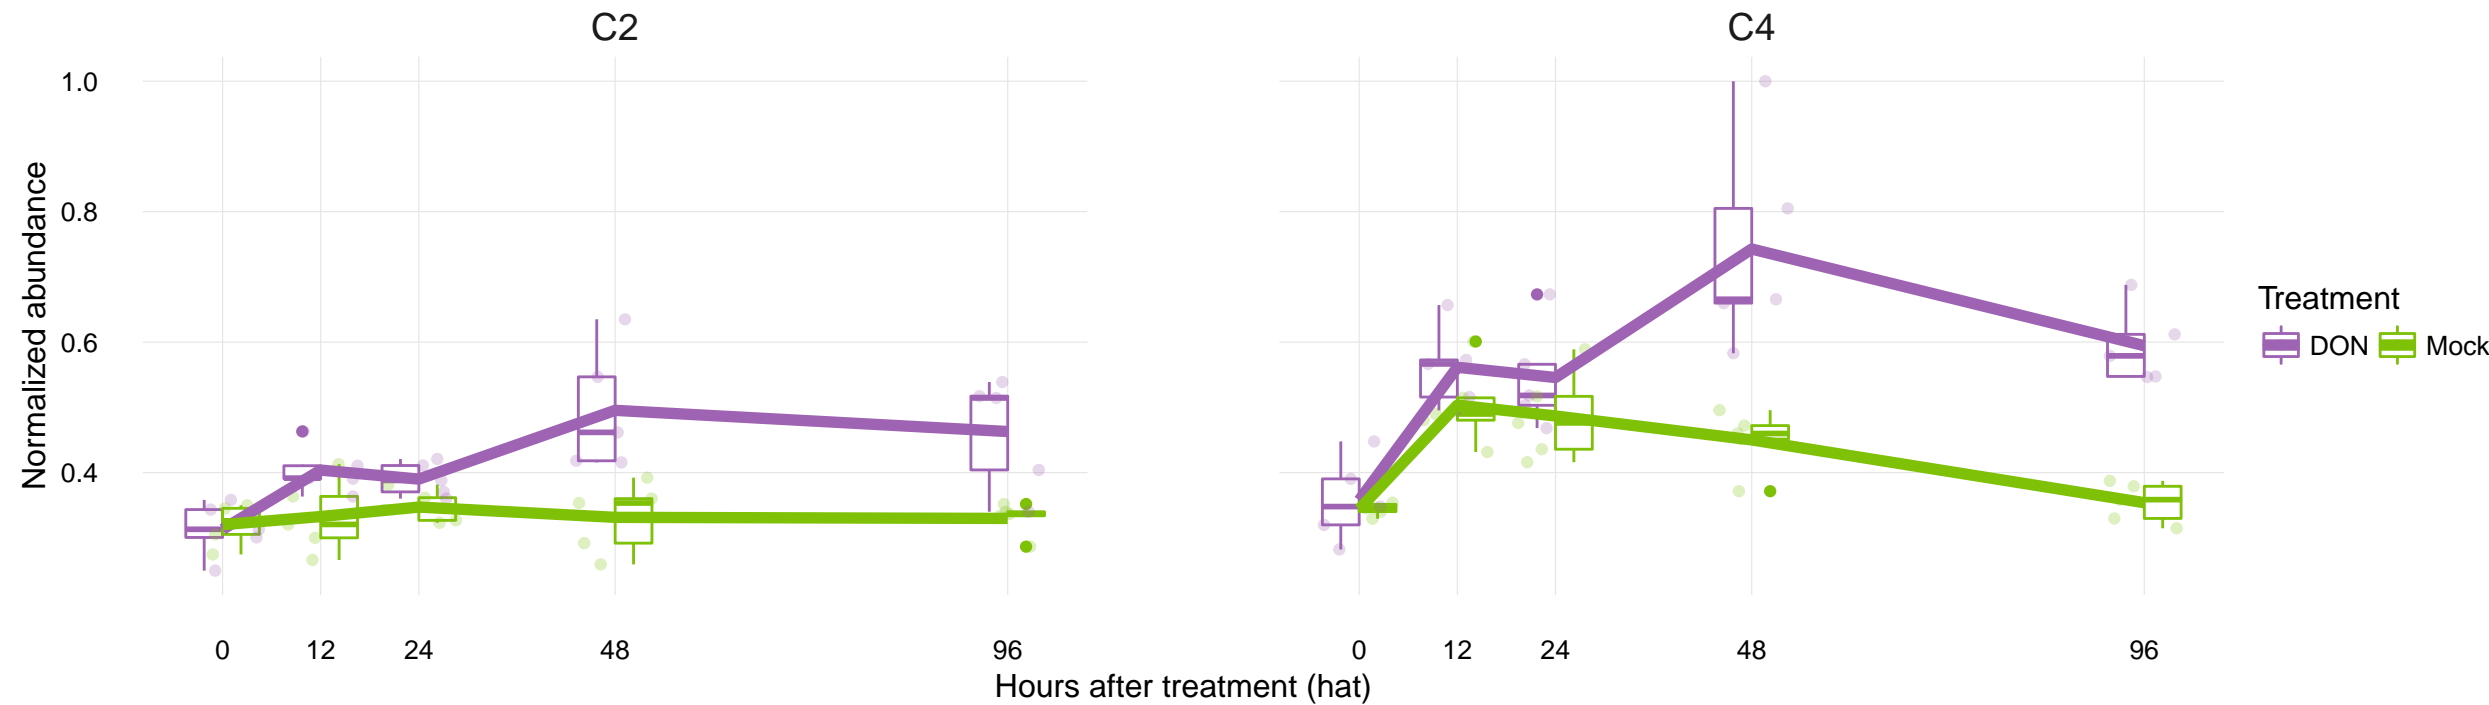

## DON, Mock; different genotypes

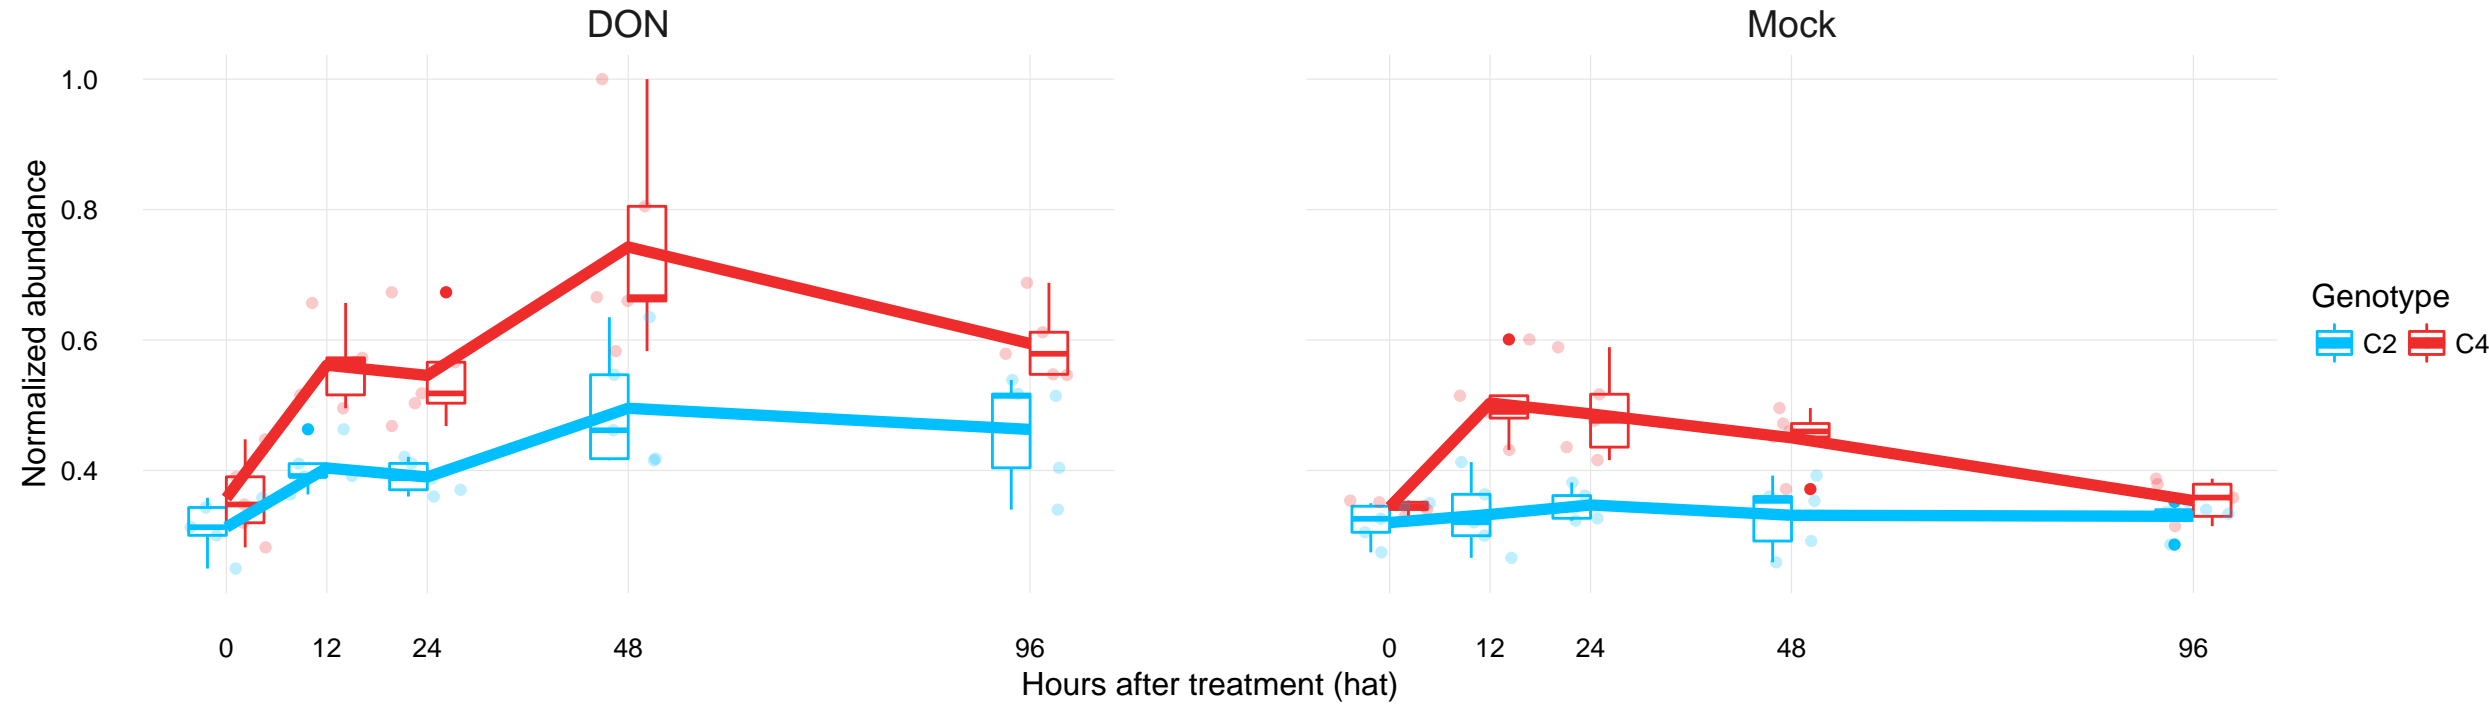

## CM, Remus; different treatments

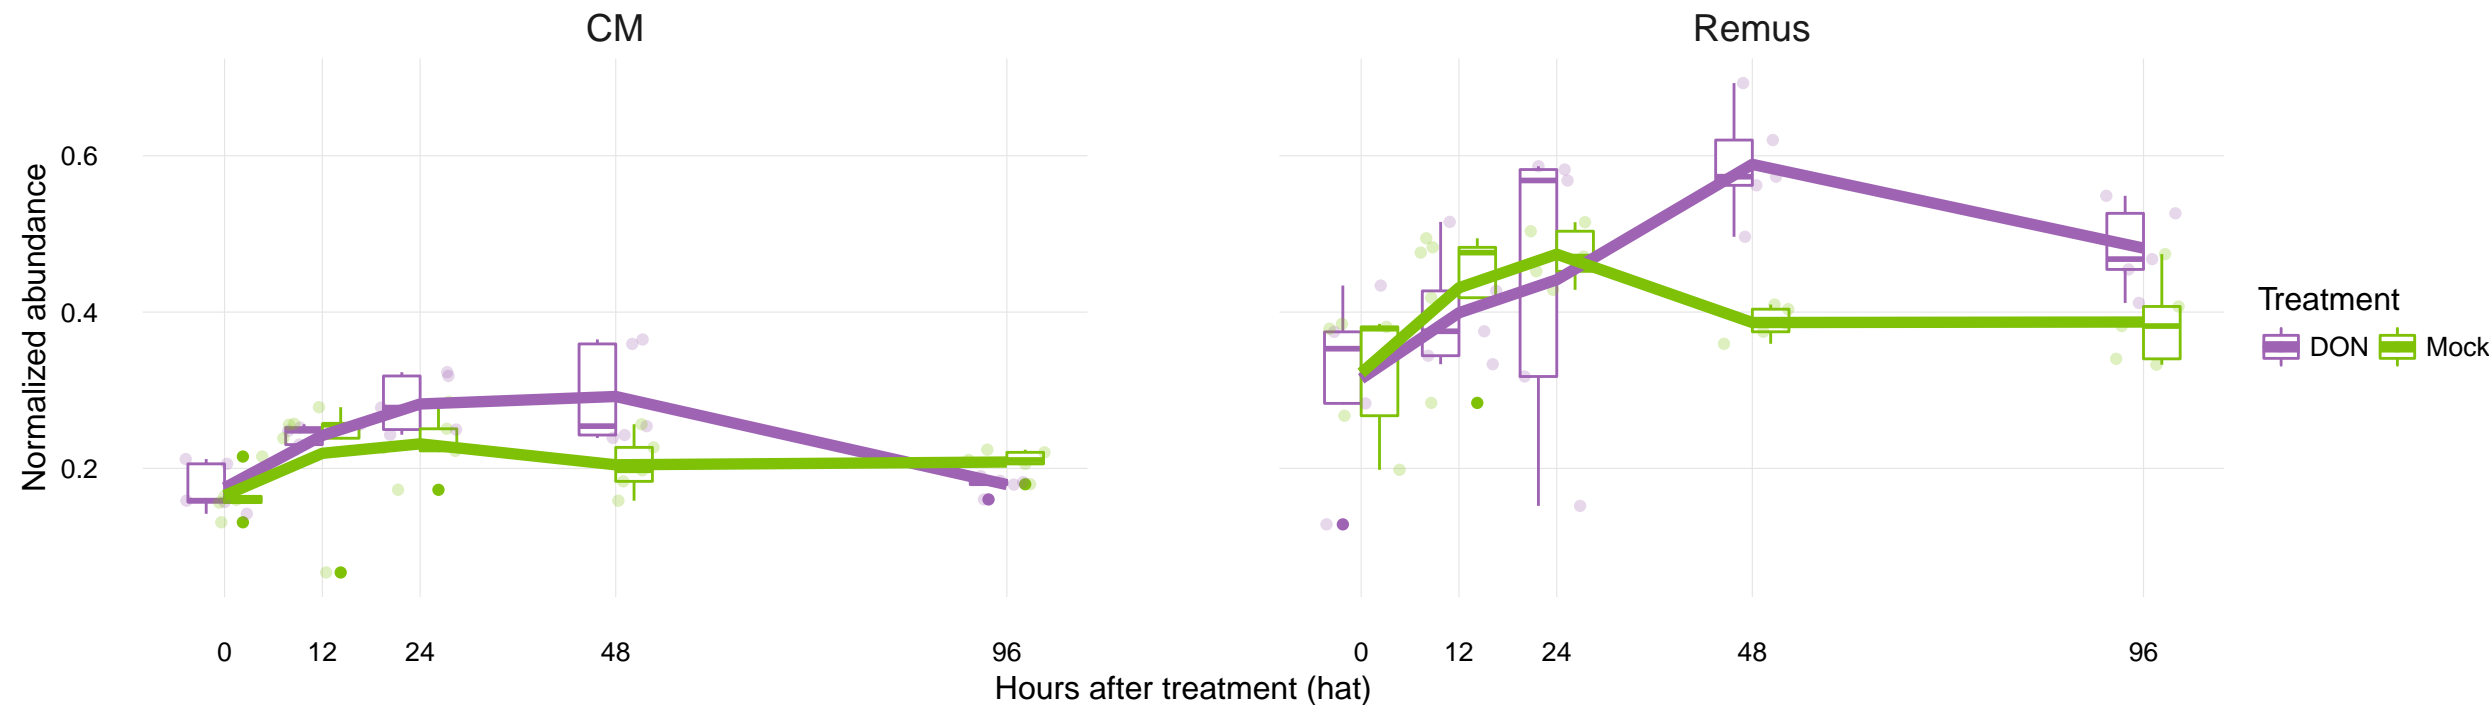

## DON, Mock; all four genotypes

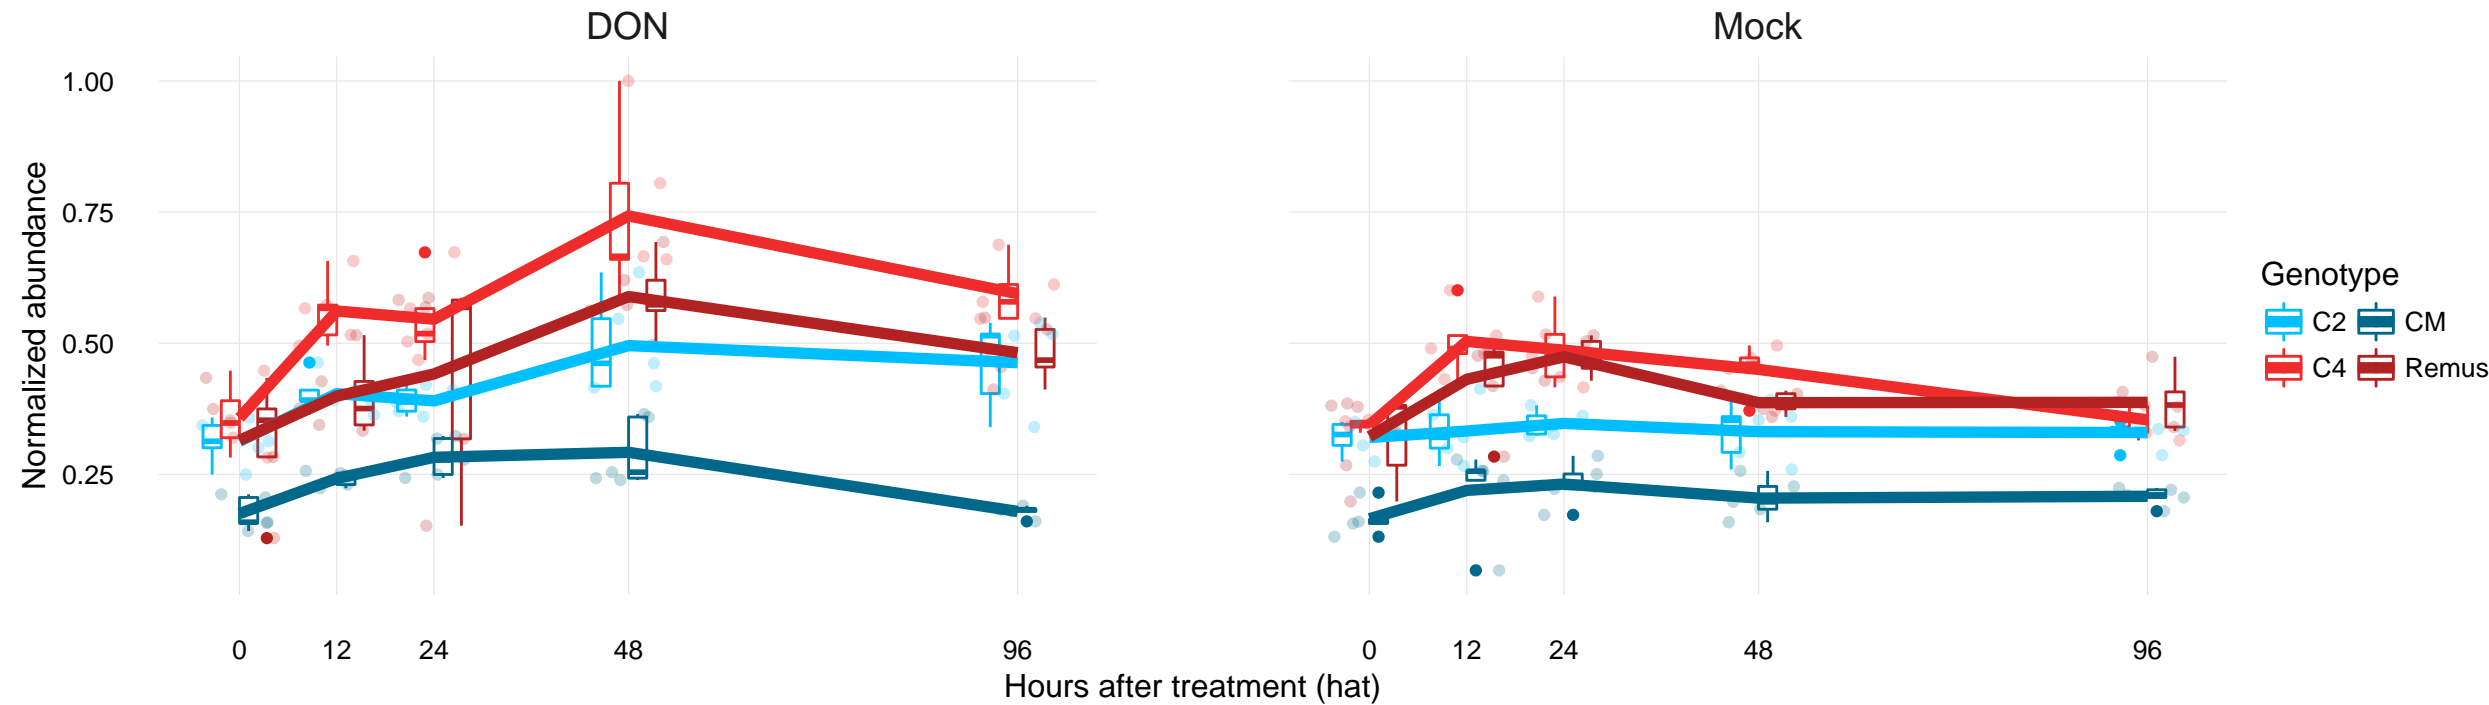

# A.129

Annotated as Flavonoid (GlcF)  
(17 database hits)

|                |                          |
|----------------|--------------------------|
| MZ             | 419.0974                 |
| RT             | 20.88 min                |
| Normalization  | Directly via KPX samples |
| Cluster        | –                        |
| Cn total / Phe | 20 /                     |

## C2, C4; different treatments

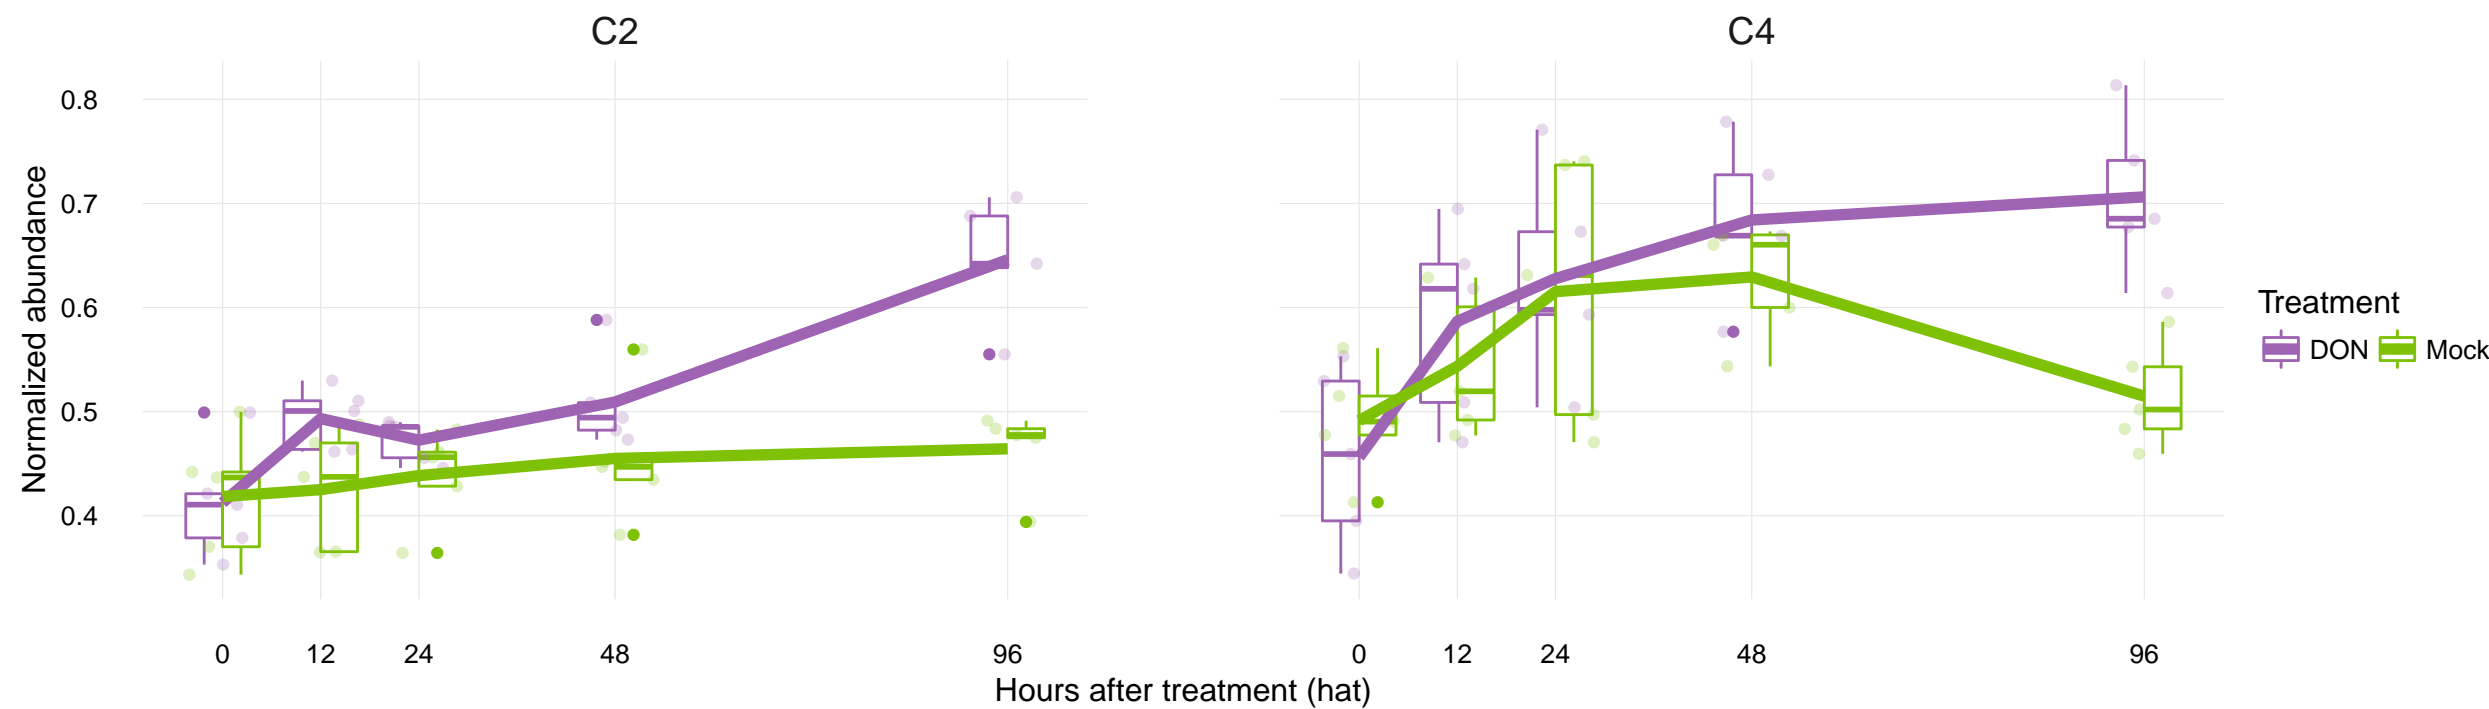

## DON, Mock; different genotypes

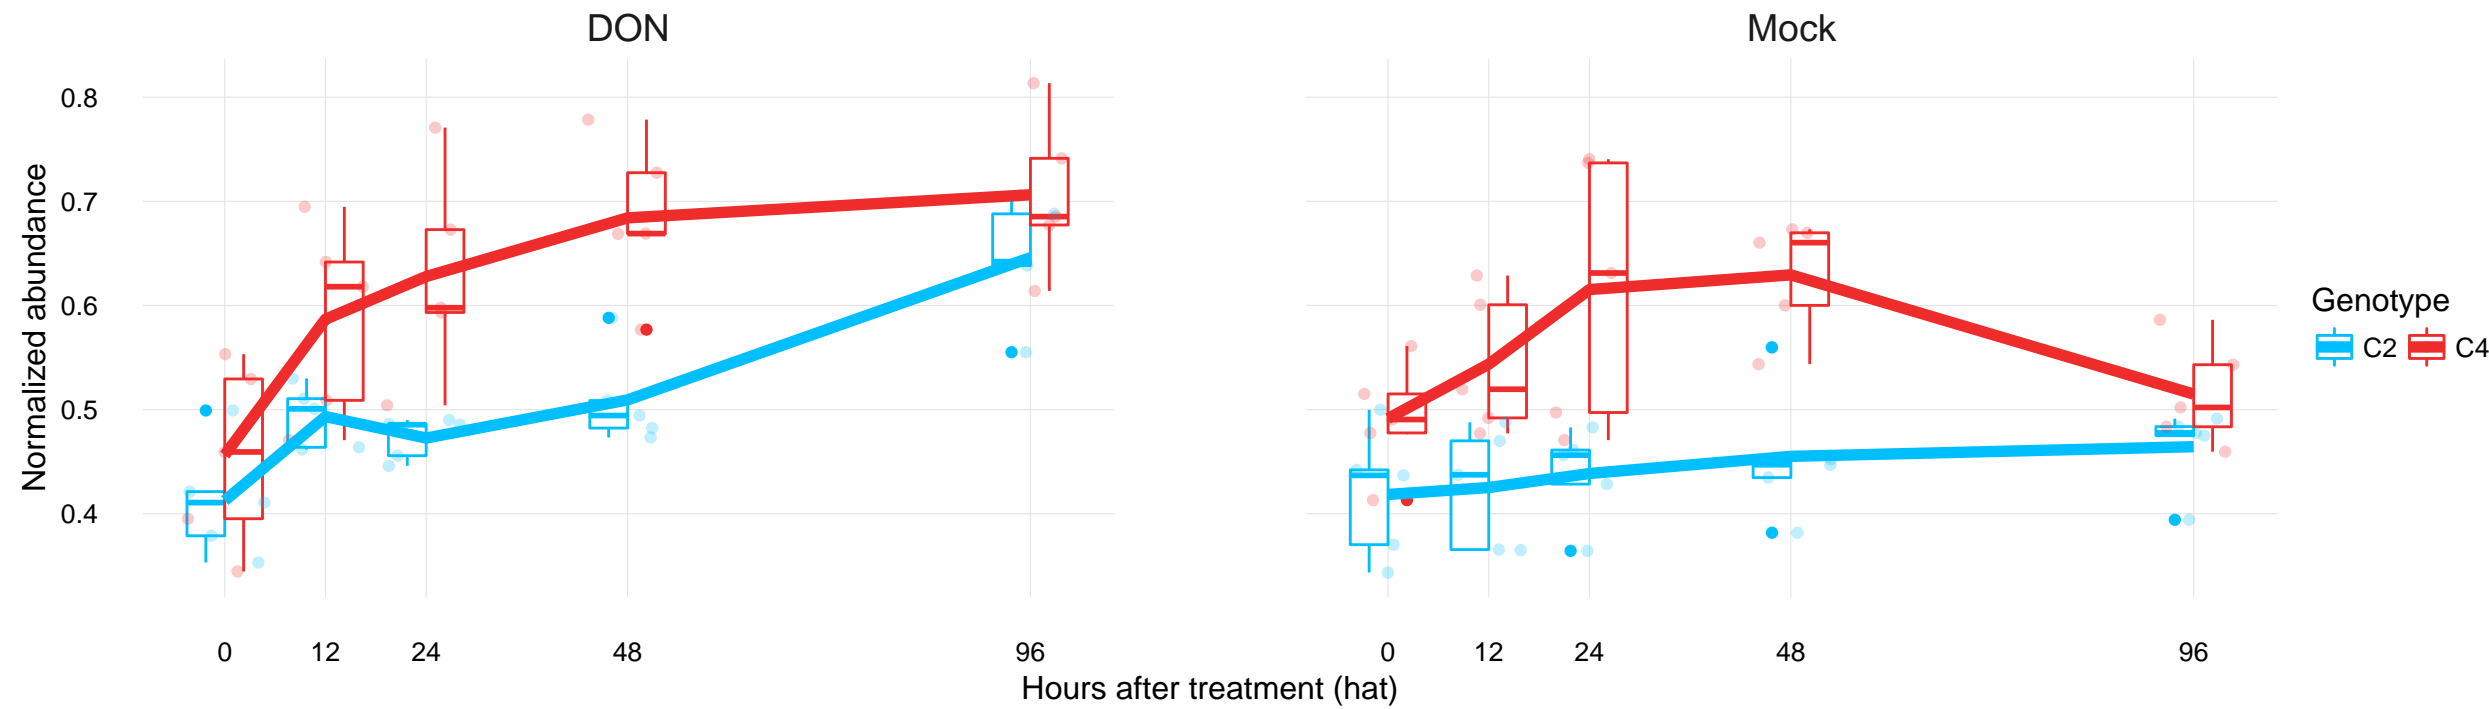

## CM, Remus; different treatments

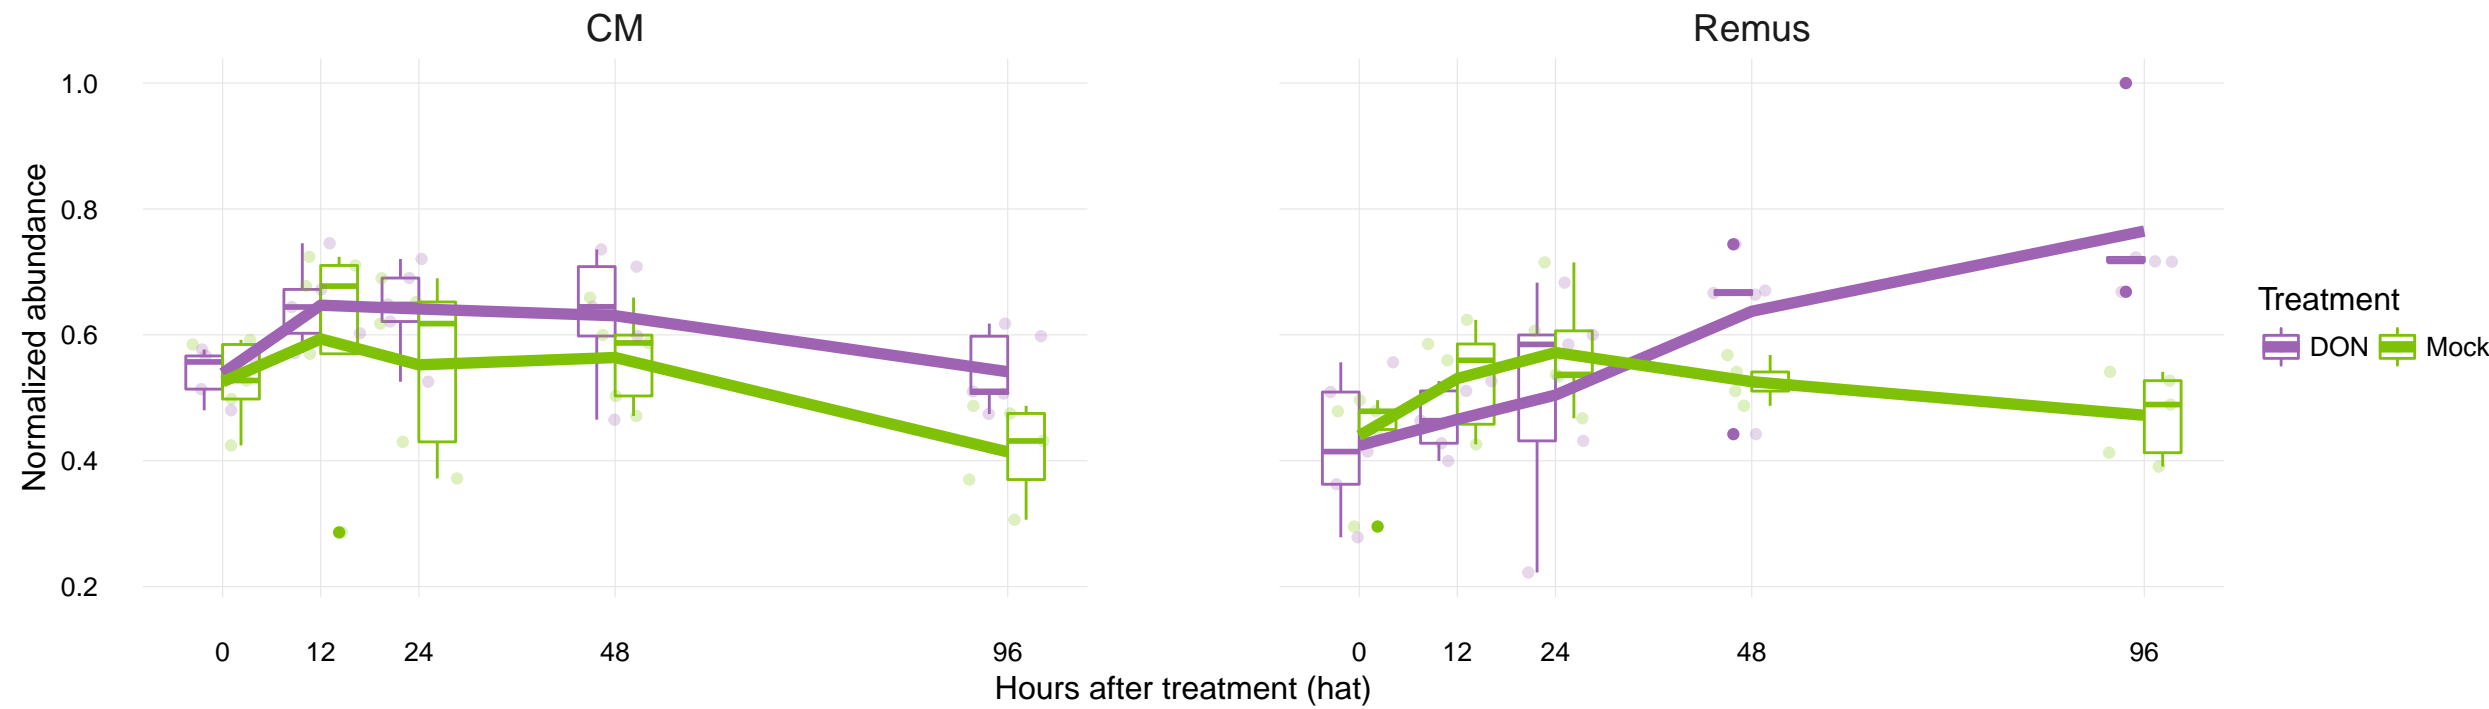

## DON, Mock; all four genotypes

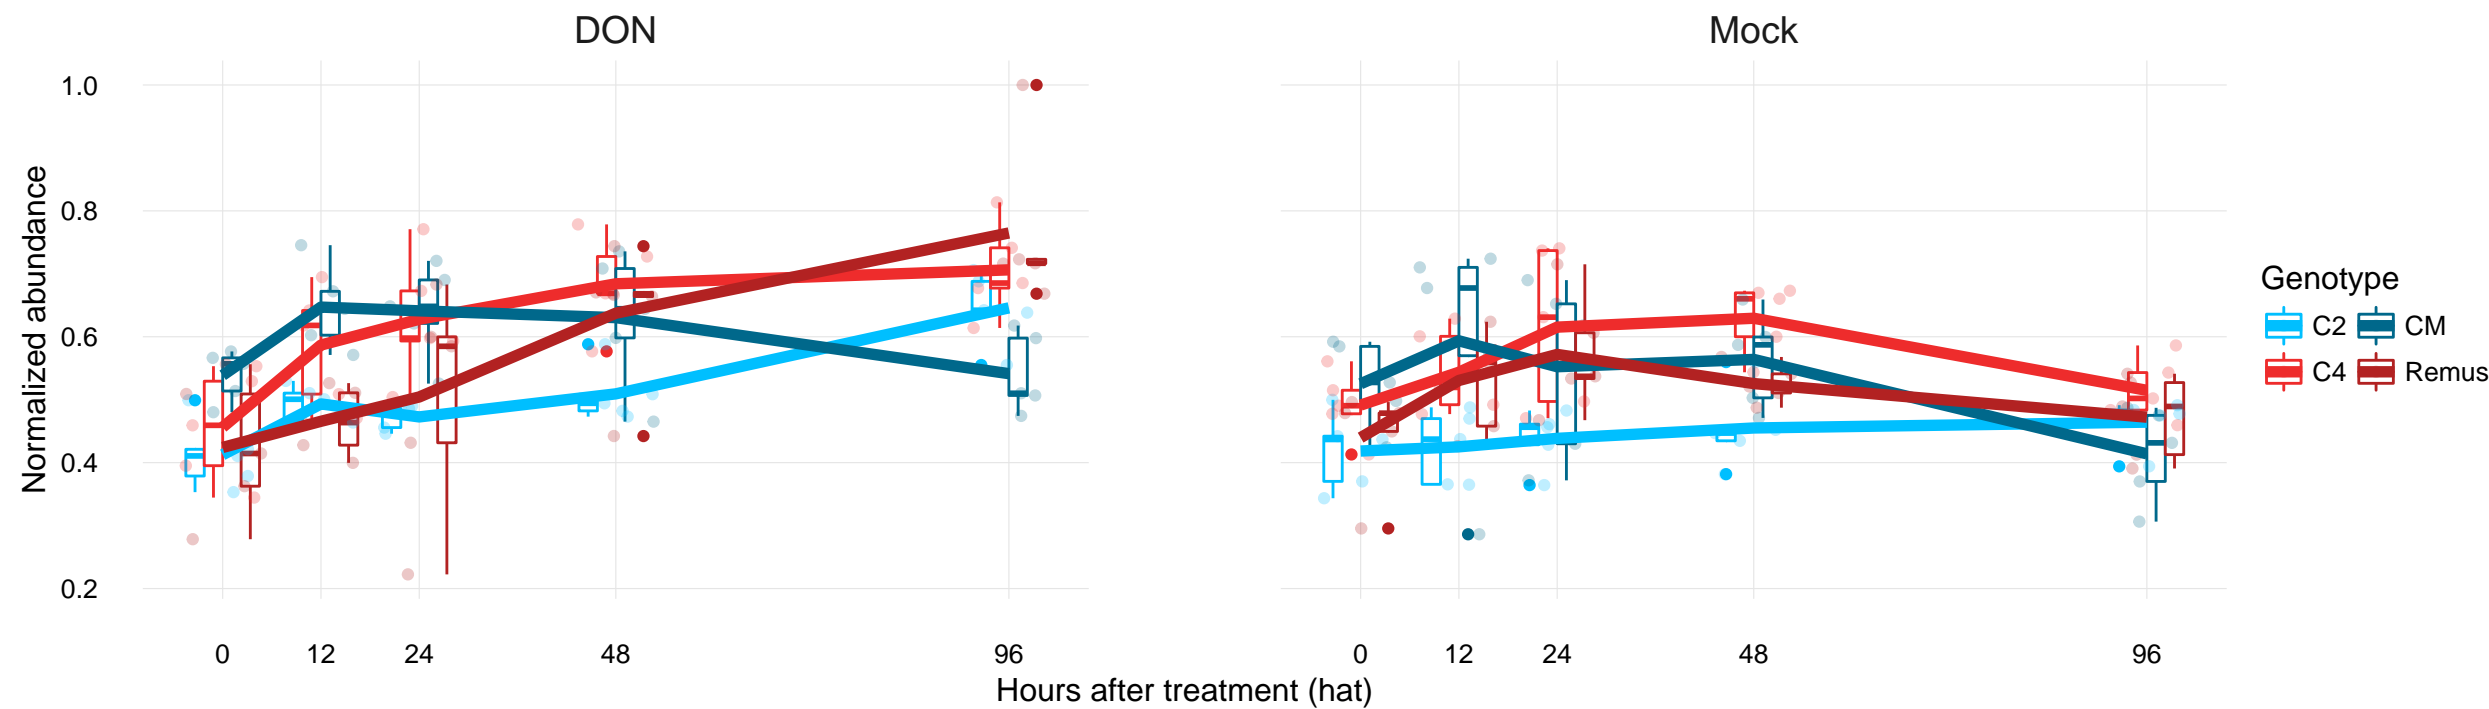

# A.127

Annotated as Flavonoid  
(74 database hits)

|                |                          |
|----------------|--------------------------|
| MZ             | 331.0813                 |
| RT             | 20.69 min                |
| Normalization  | Directly via KPX samples |
| Cluster        | –                        |
| Cn total / Phe | 17 /                     |

## C2, C4; different treatments

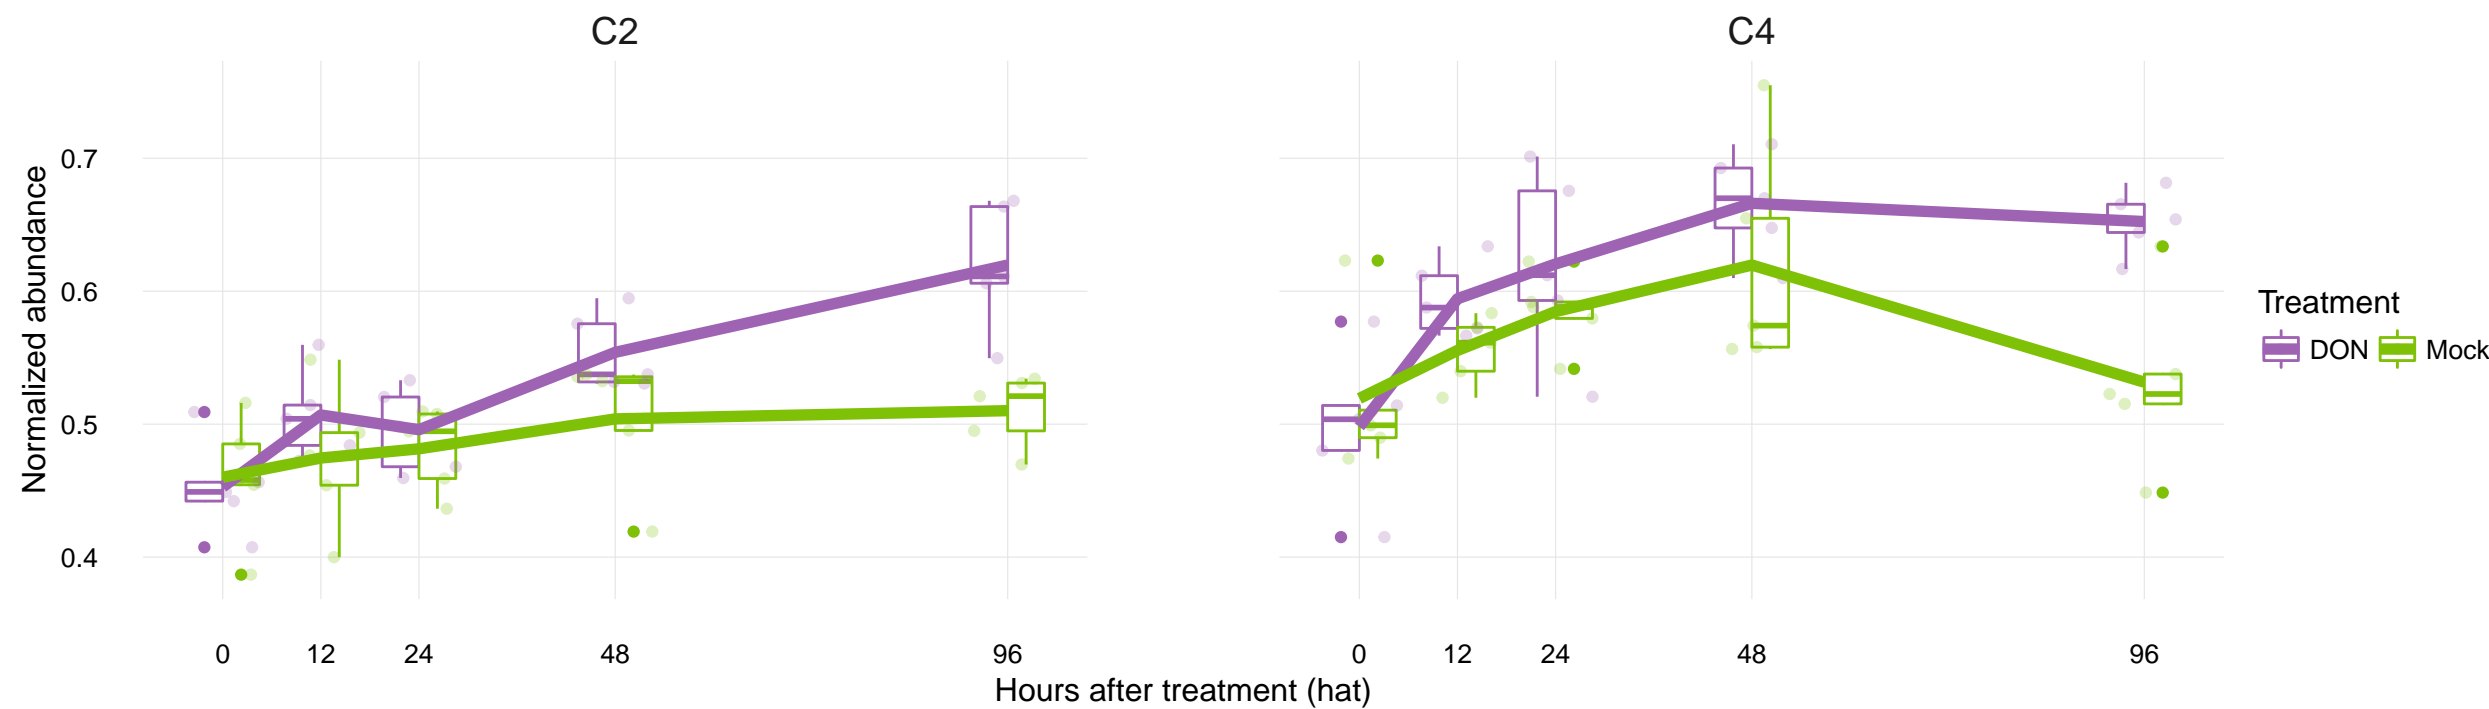

## DON, Mock; different genotypes

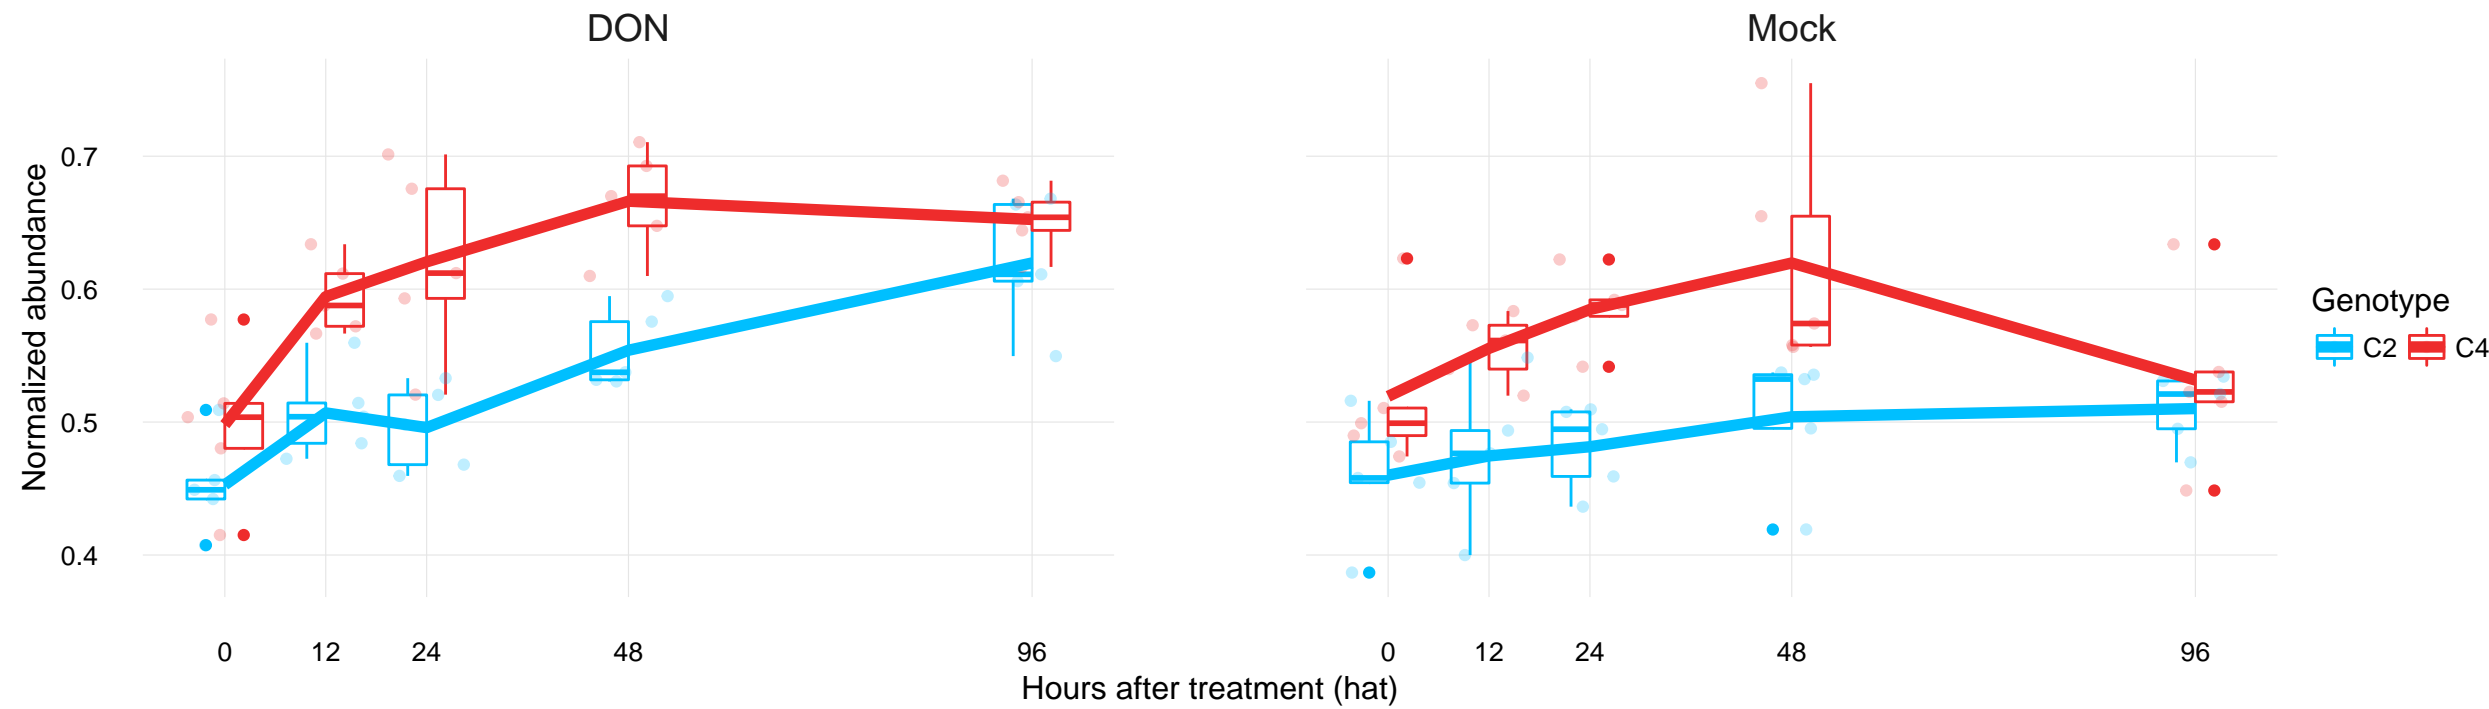

## CM, Remus; different treatments

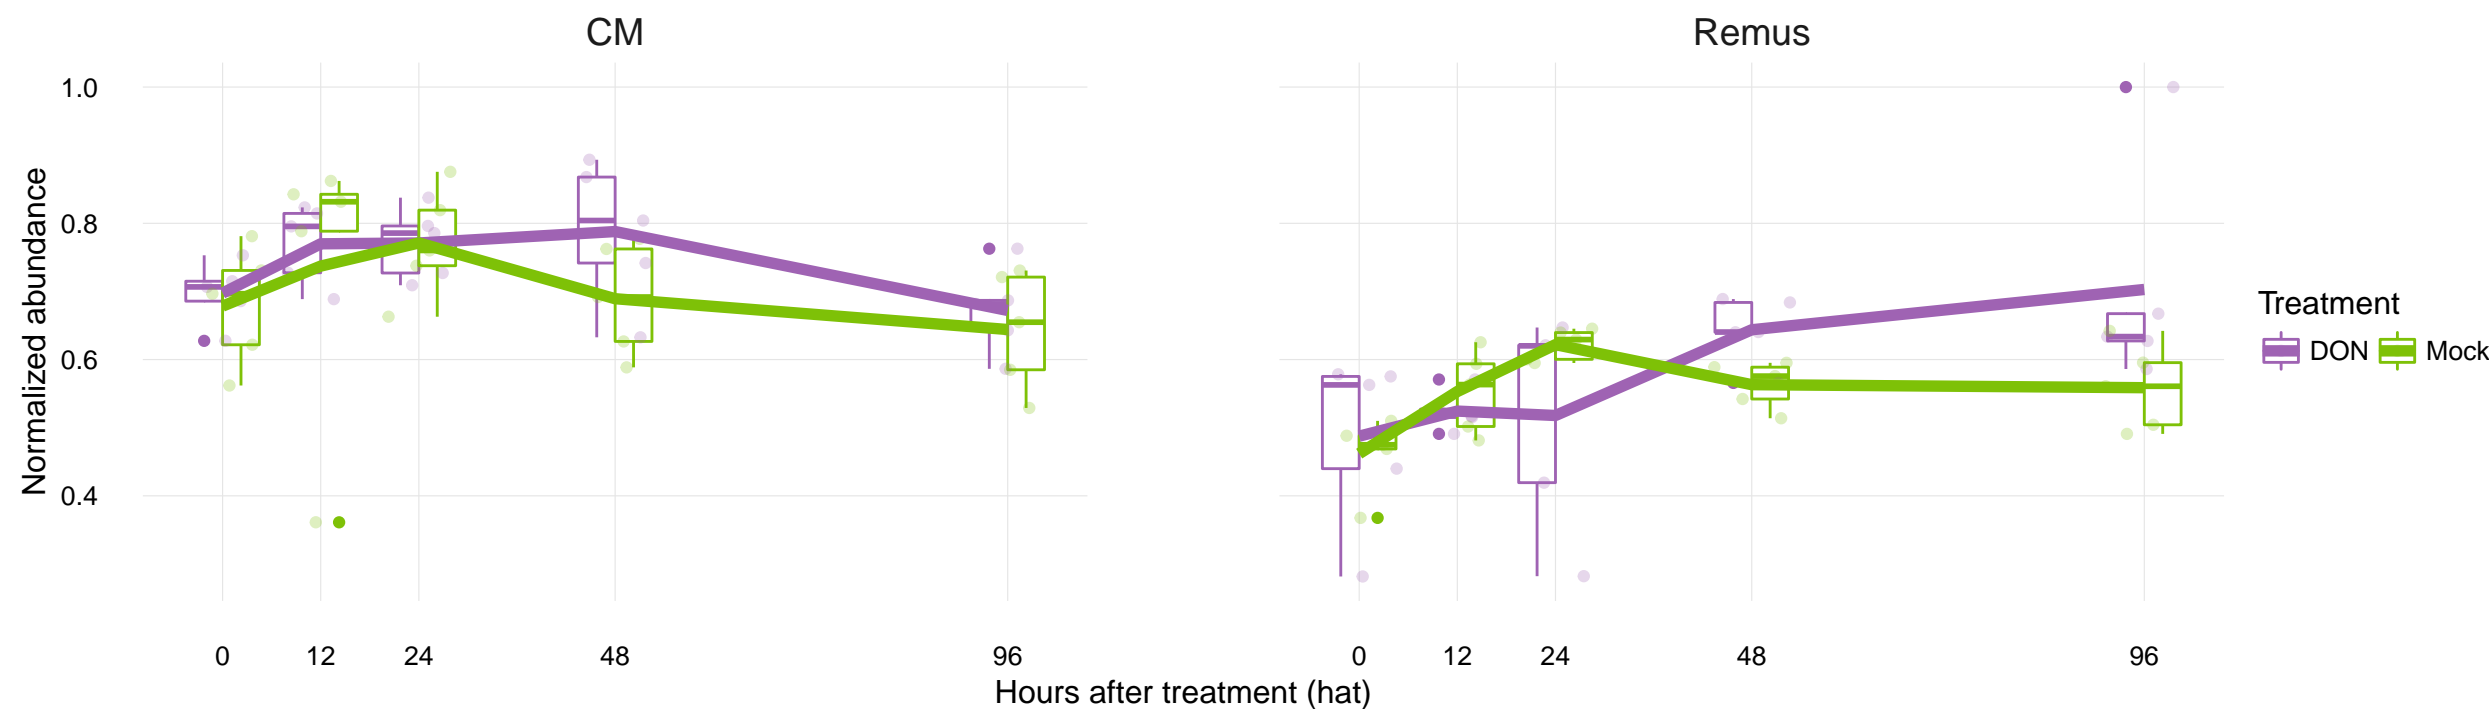

## DON, Mock; all four genotypes

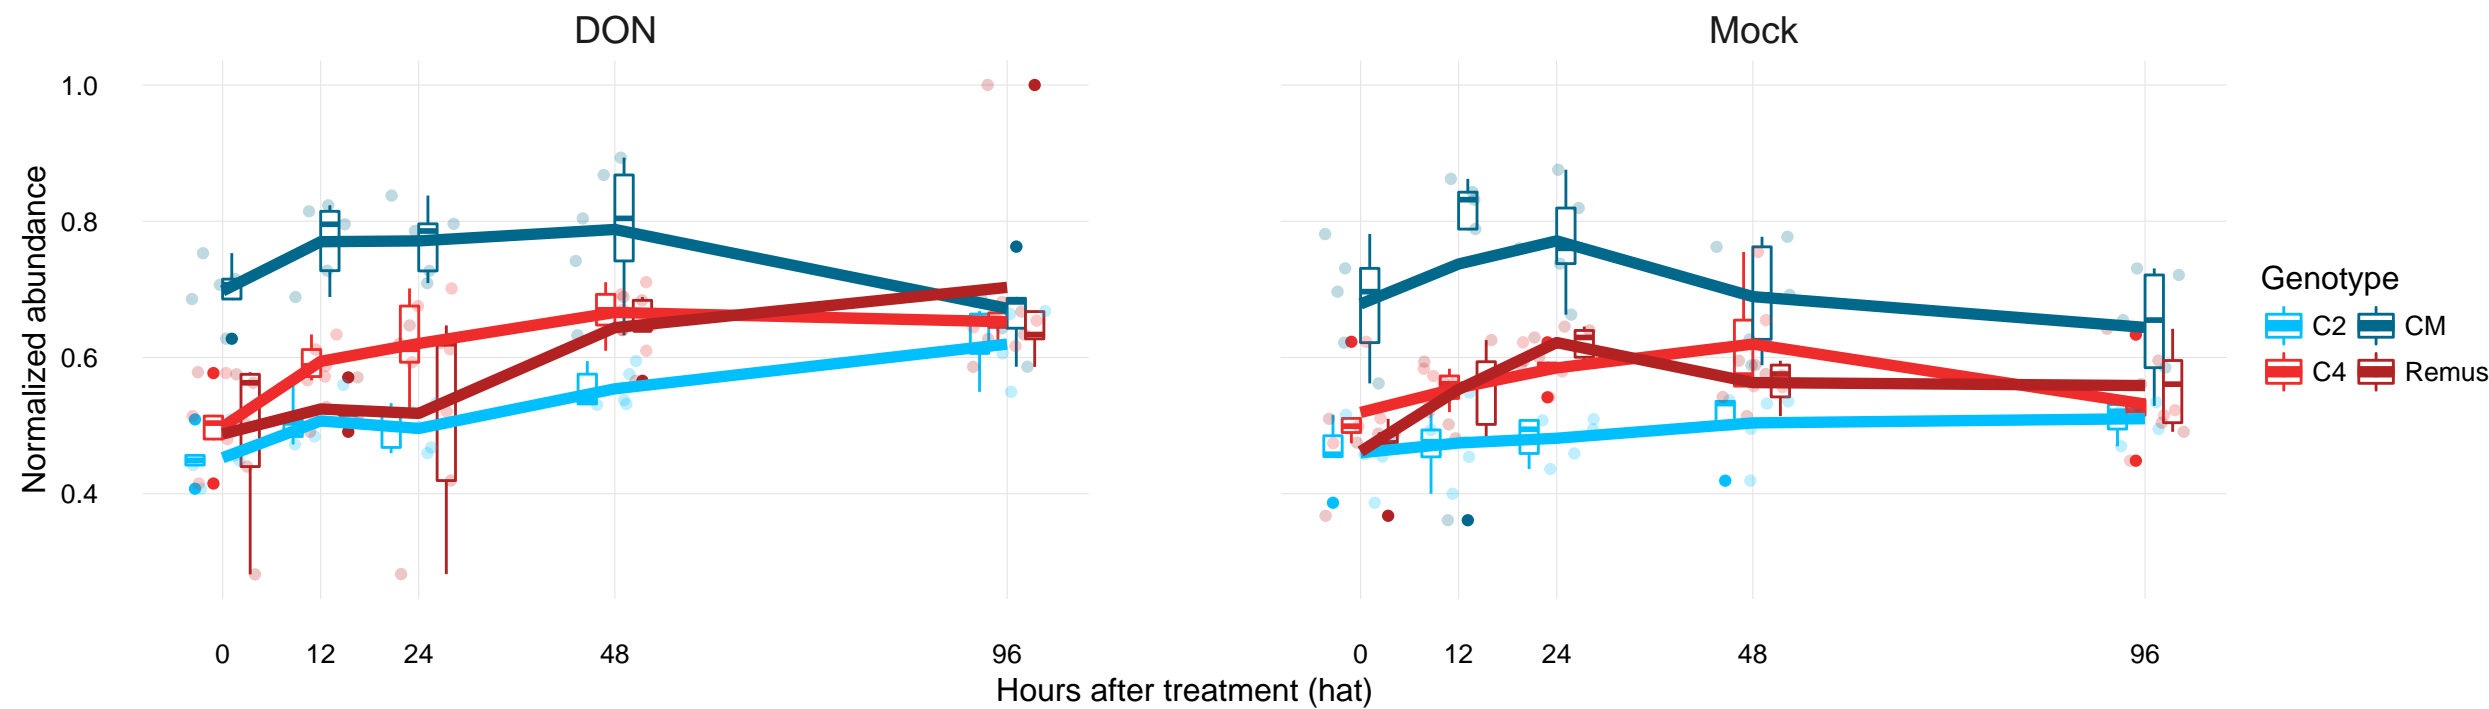

# A.98

Annotated as Flavonoid (diGlcF)  
(17 database hits)

|                |                          |
|----------------|--------------------------|
| MZ             | 639.1923                 |
| RT             | 16.48 min                |
| Normalization  | Directly via KPX samples |
| Cluster        | –                        |
| Cn total / Phe | 29 /                     |

## C2, C4; different treatments

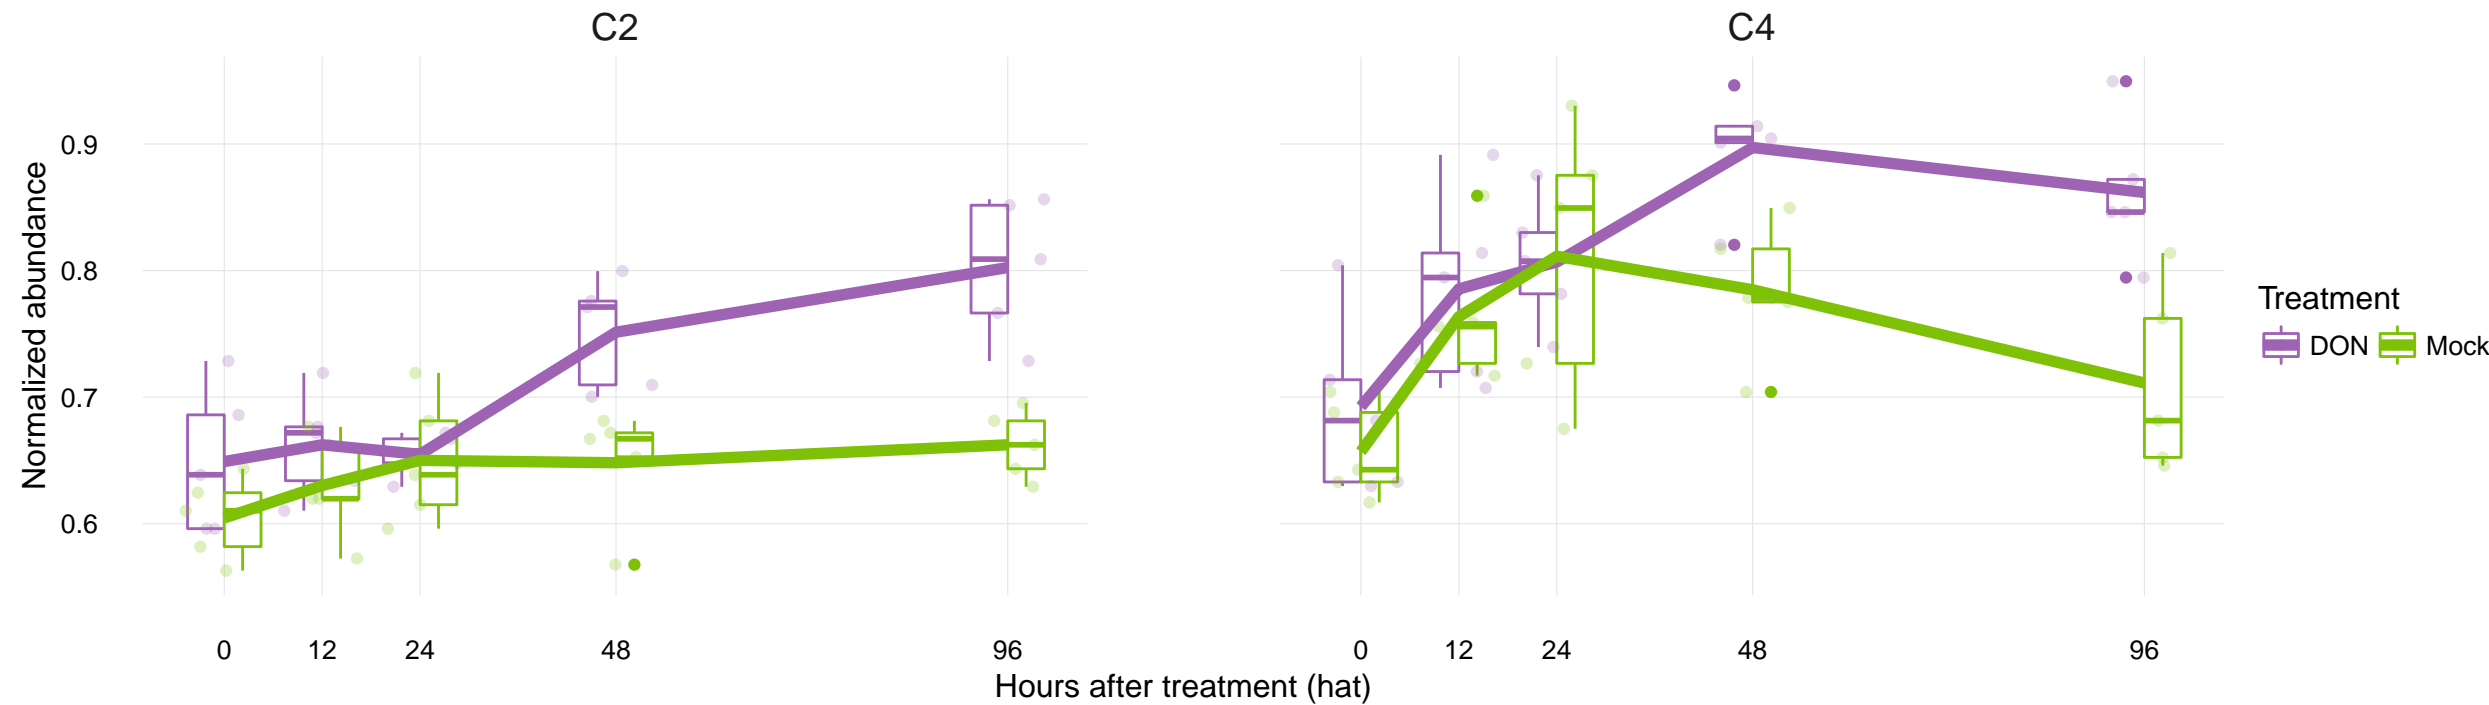

## DON, Mock; different genotypes

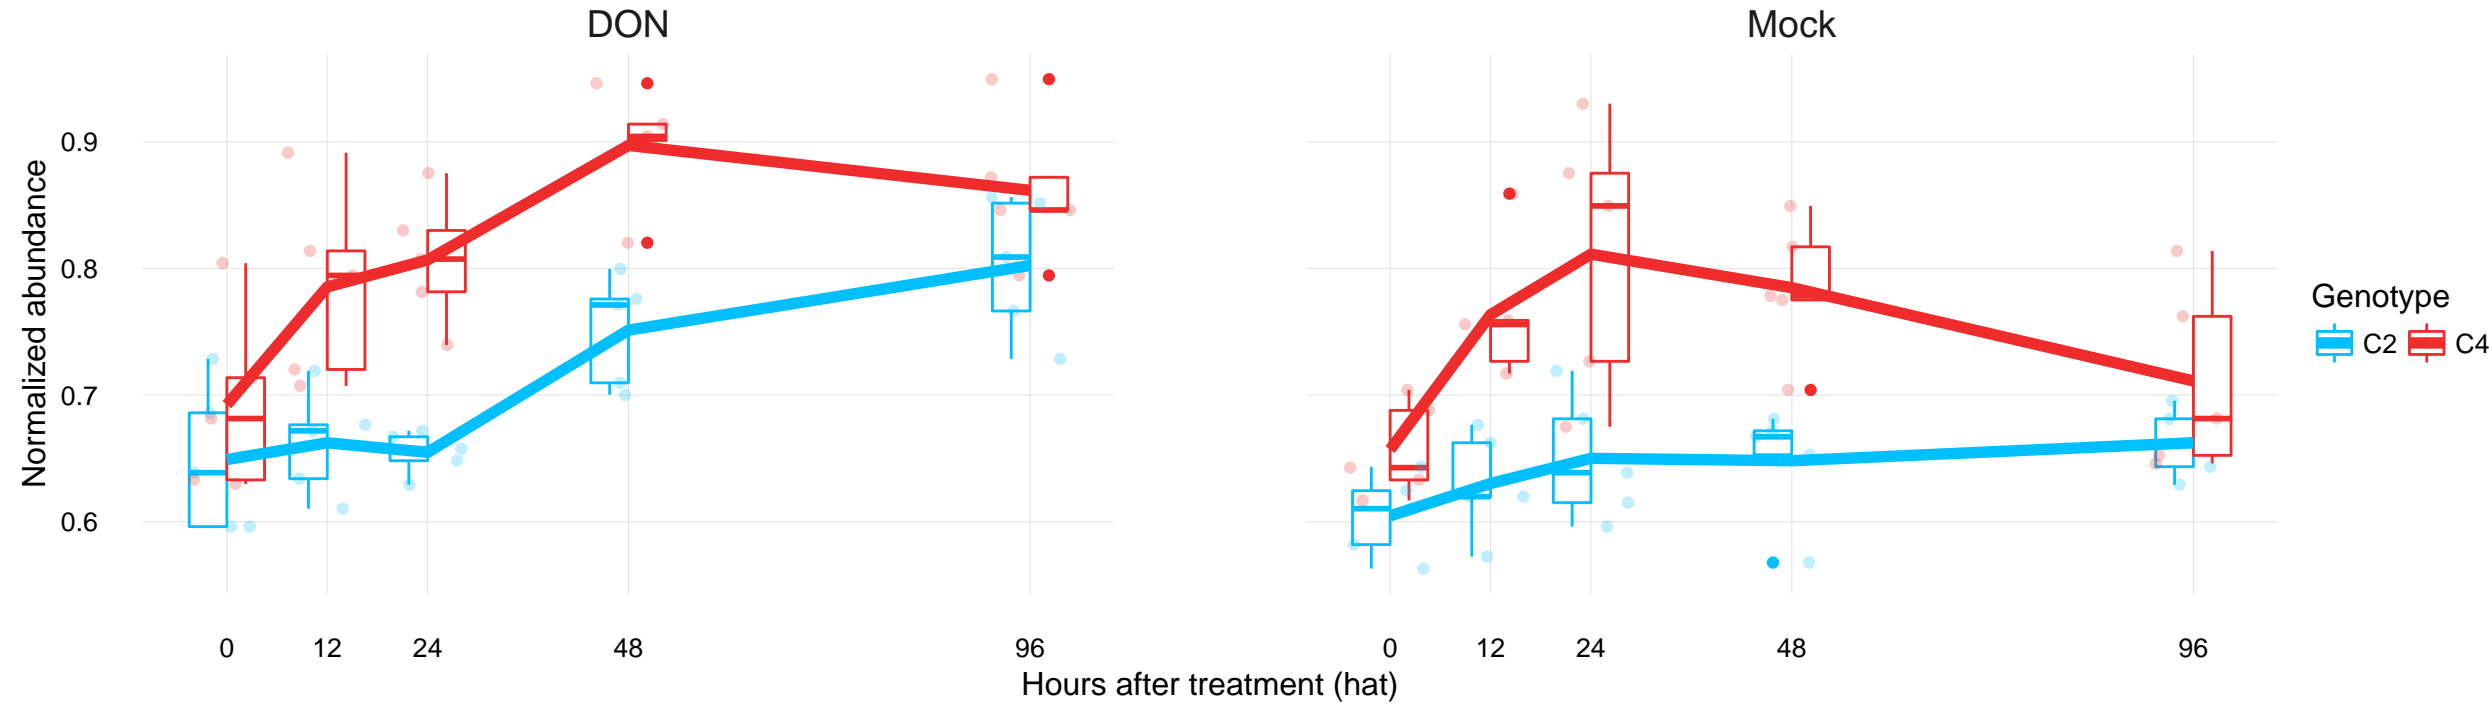

## CM, Remus; different treatments

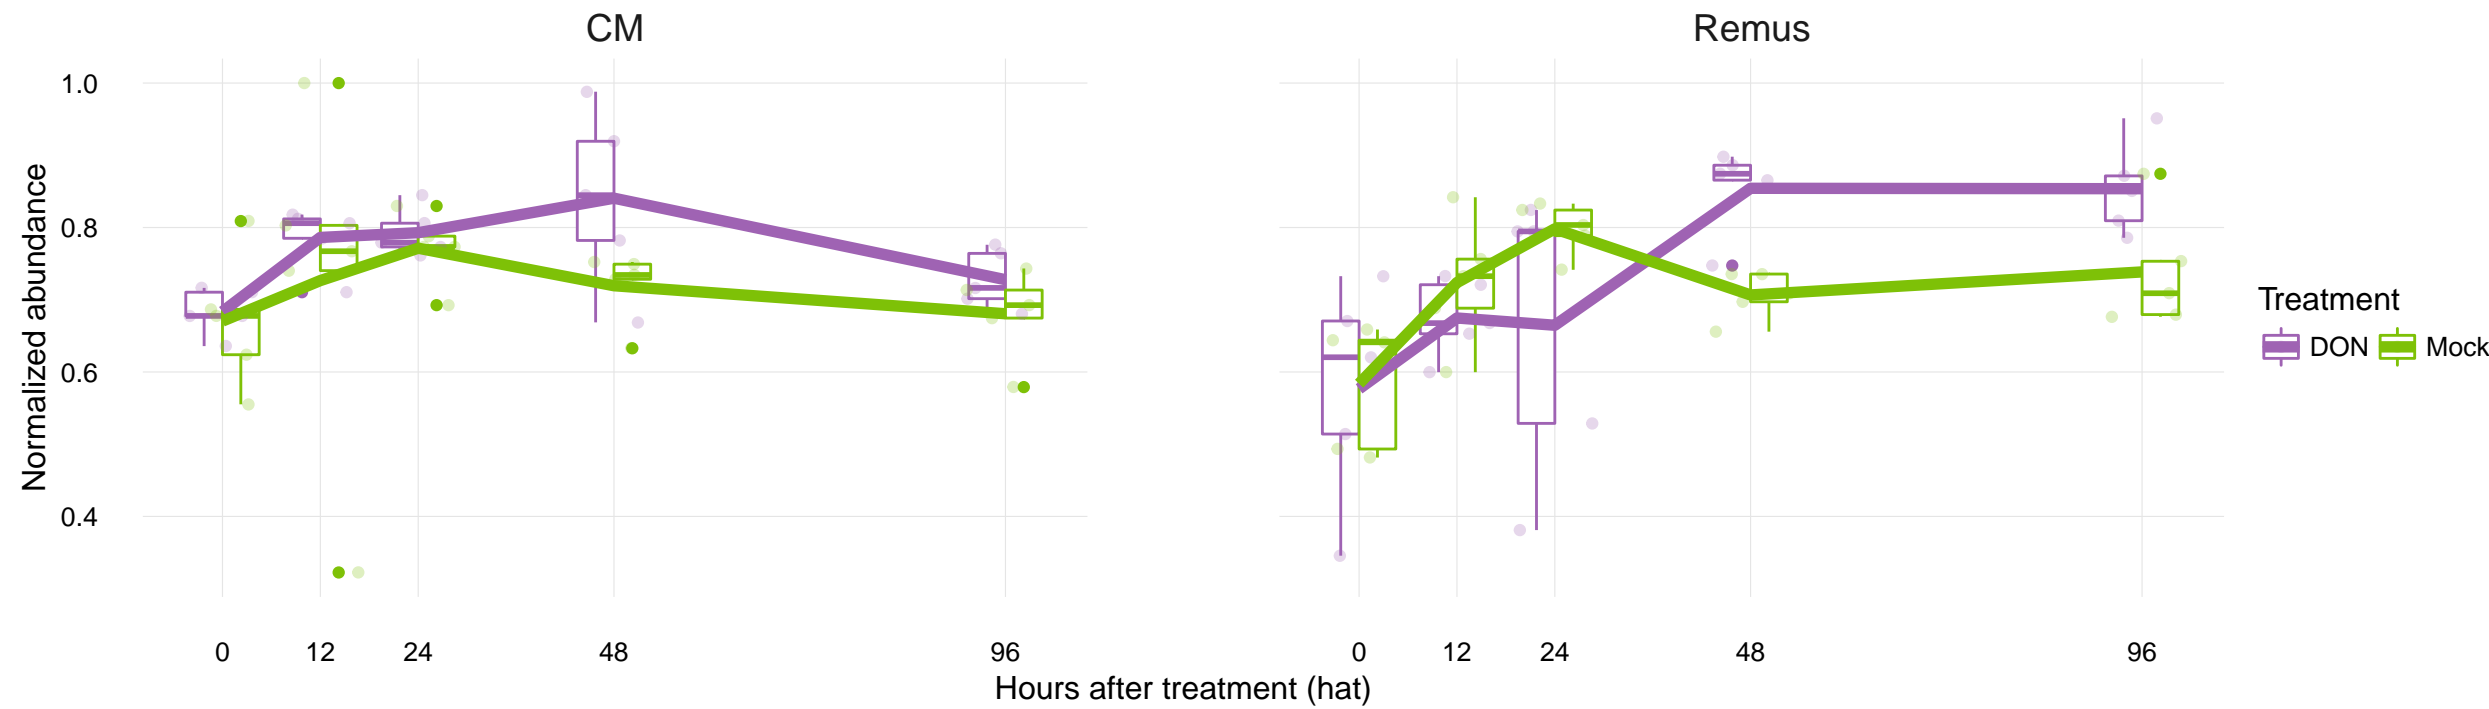

## DON, Mock; all four genotypes

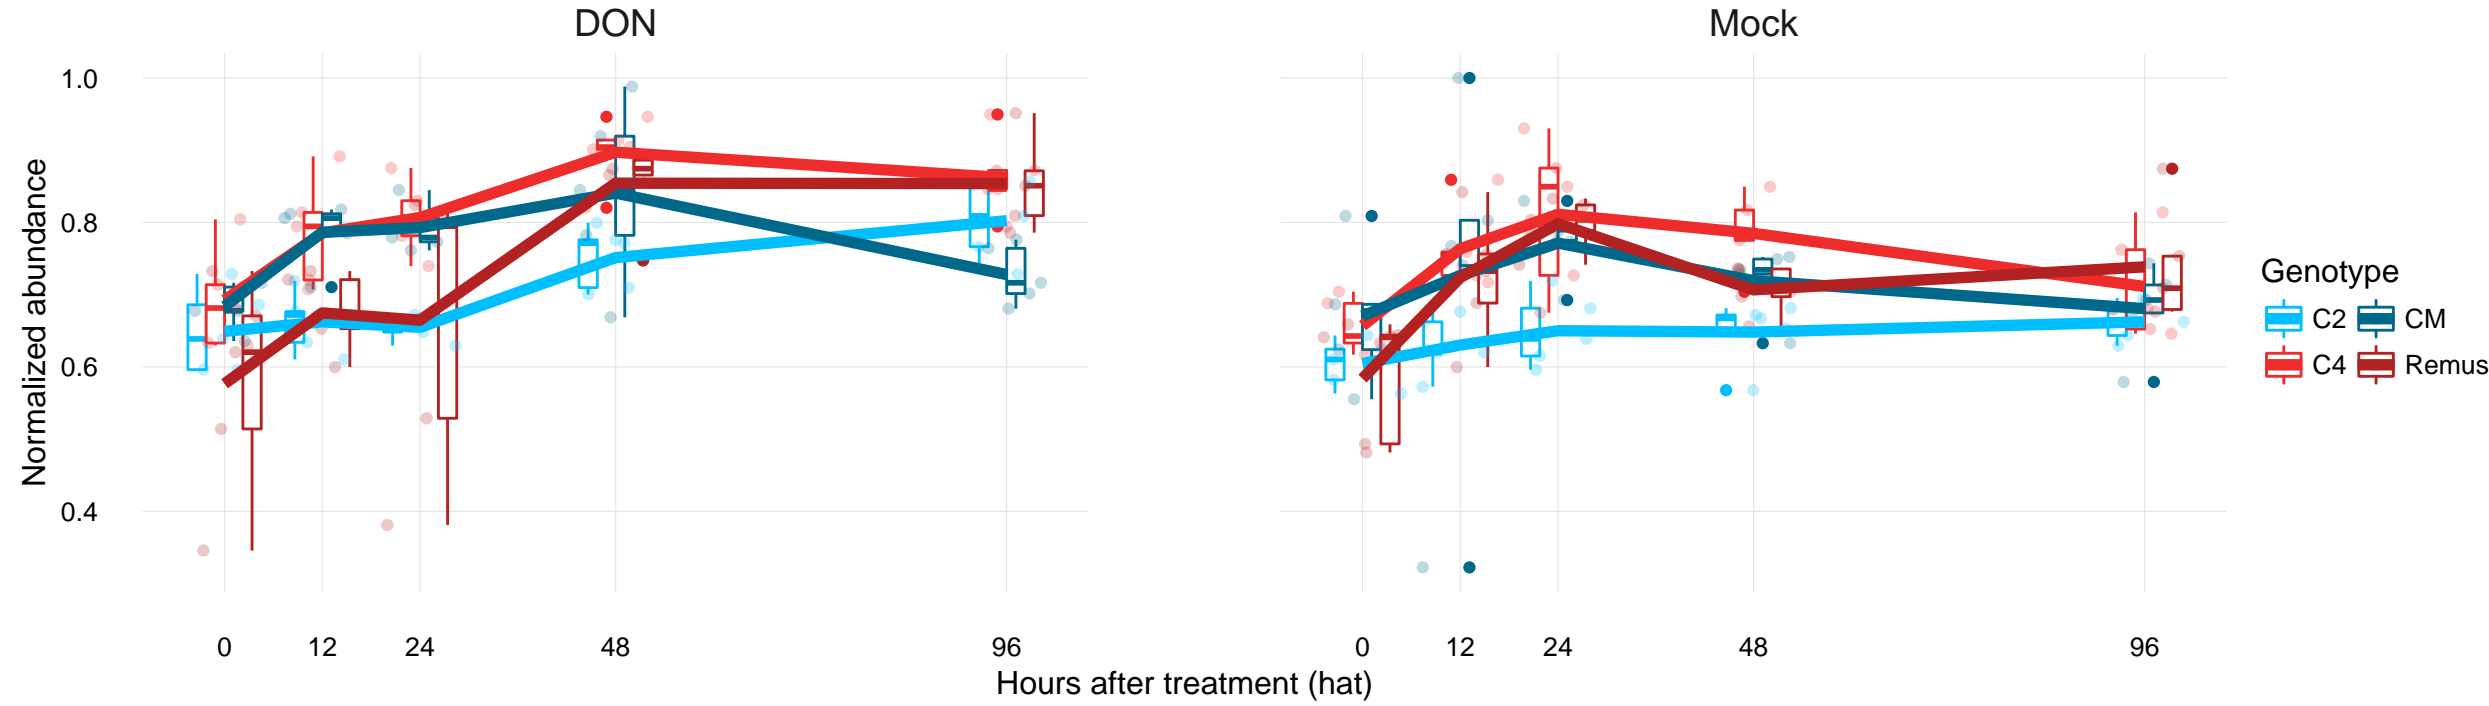

A.97

Annotated as Flavonoid (GlcF)  
(51 database hits)

|                |                          |
|----------------|--------------------------|
| MZ             | 493.1342                 |
| RT             | 16.47 min                |
| Normalization  | Directly via KPX samples |
| Cluster        | –                        |
| Cn total / Phe | 23 /                     |

C2, C4; different treatments

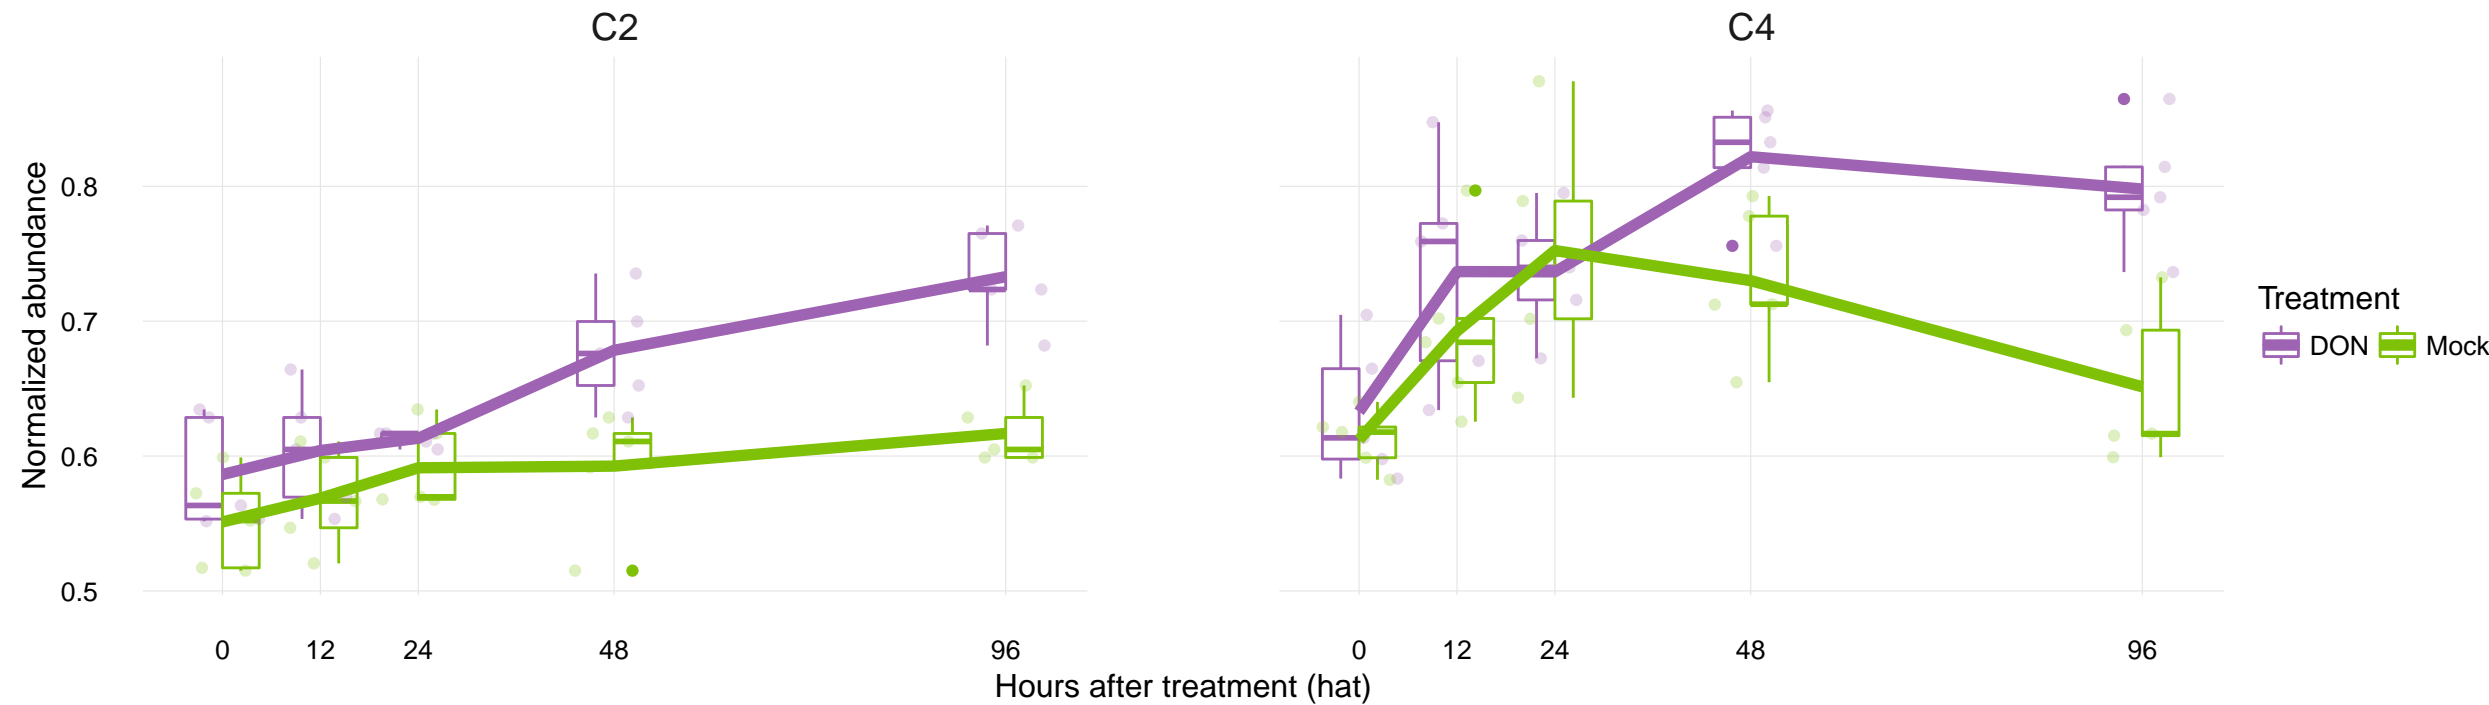

DON, Mock; different genotypes

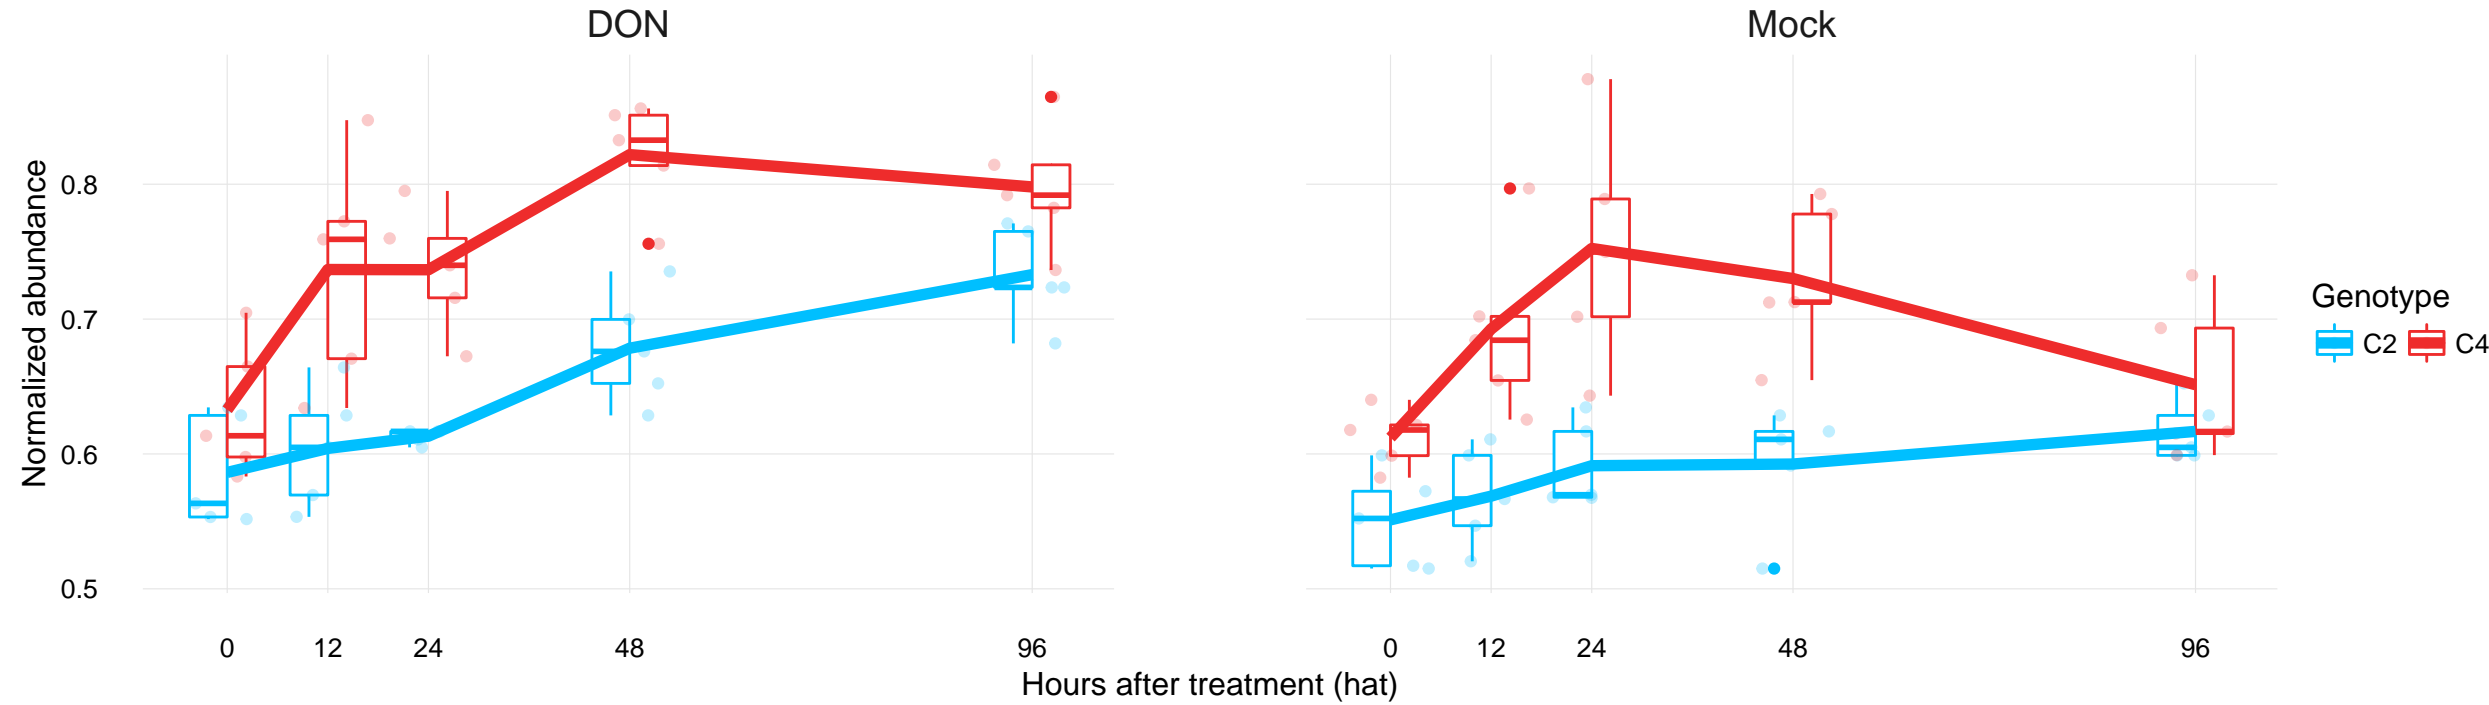

CM, Remus; different treatments

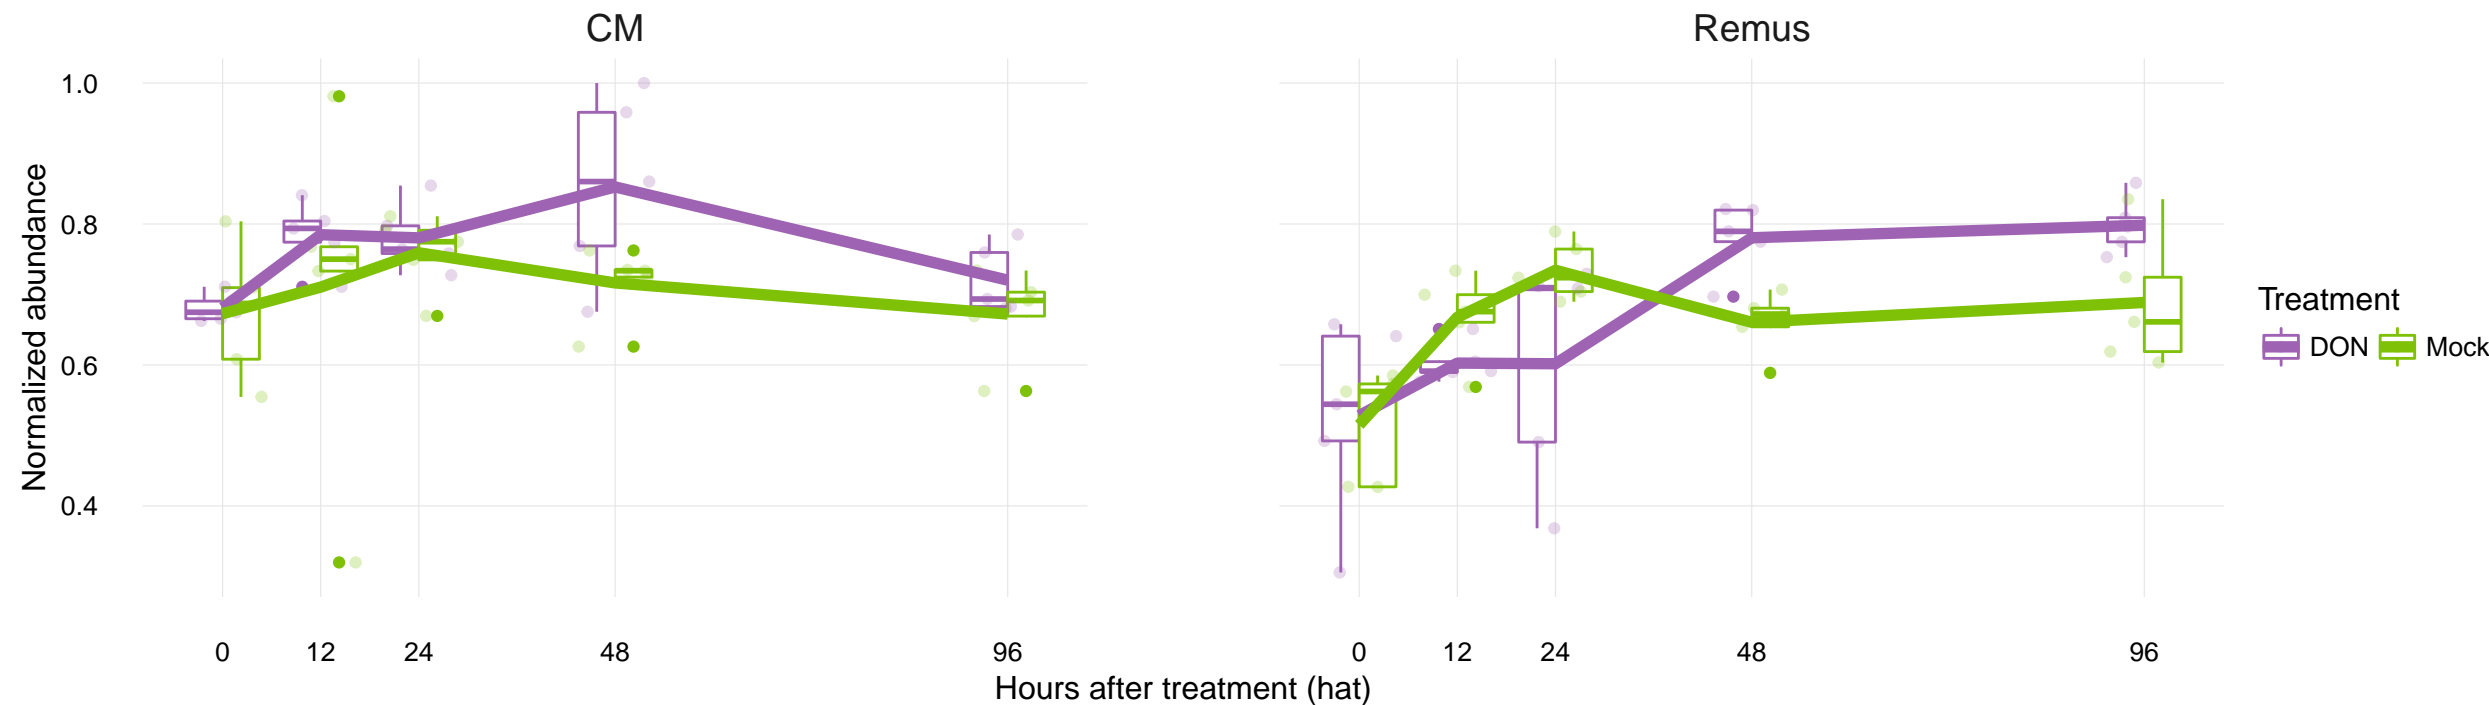

DON, Mock; all four genotypes

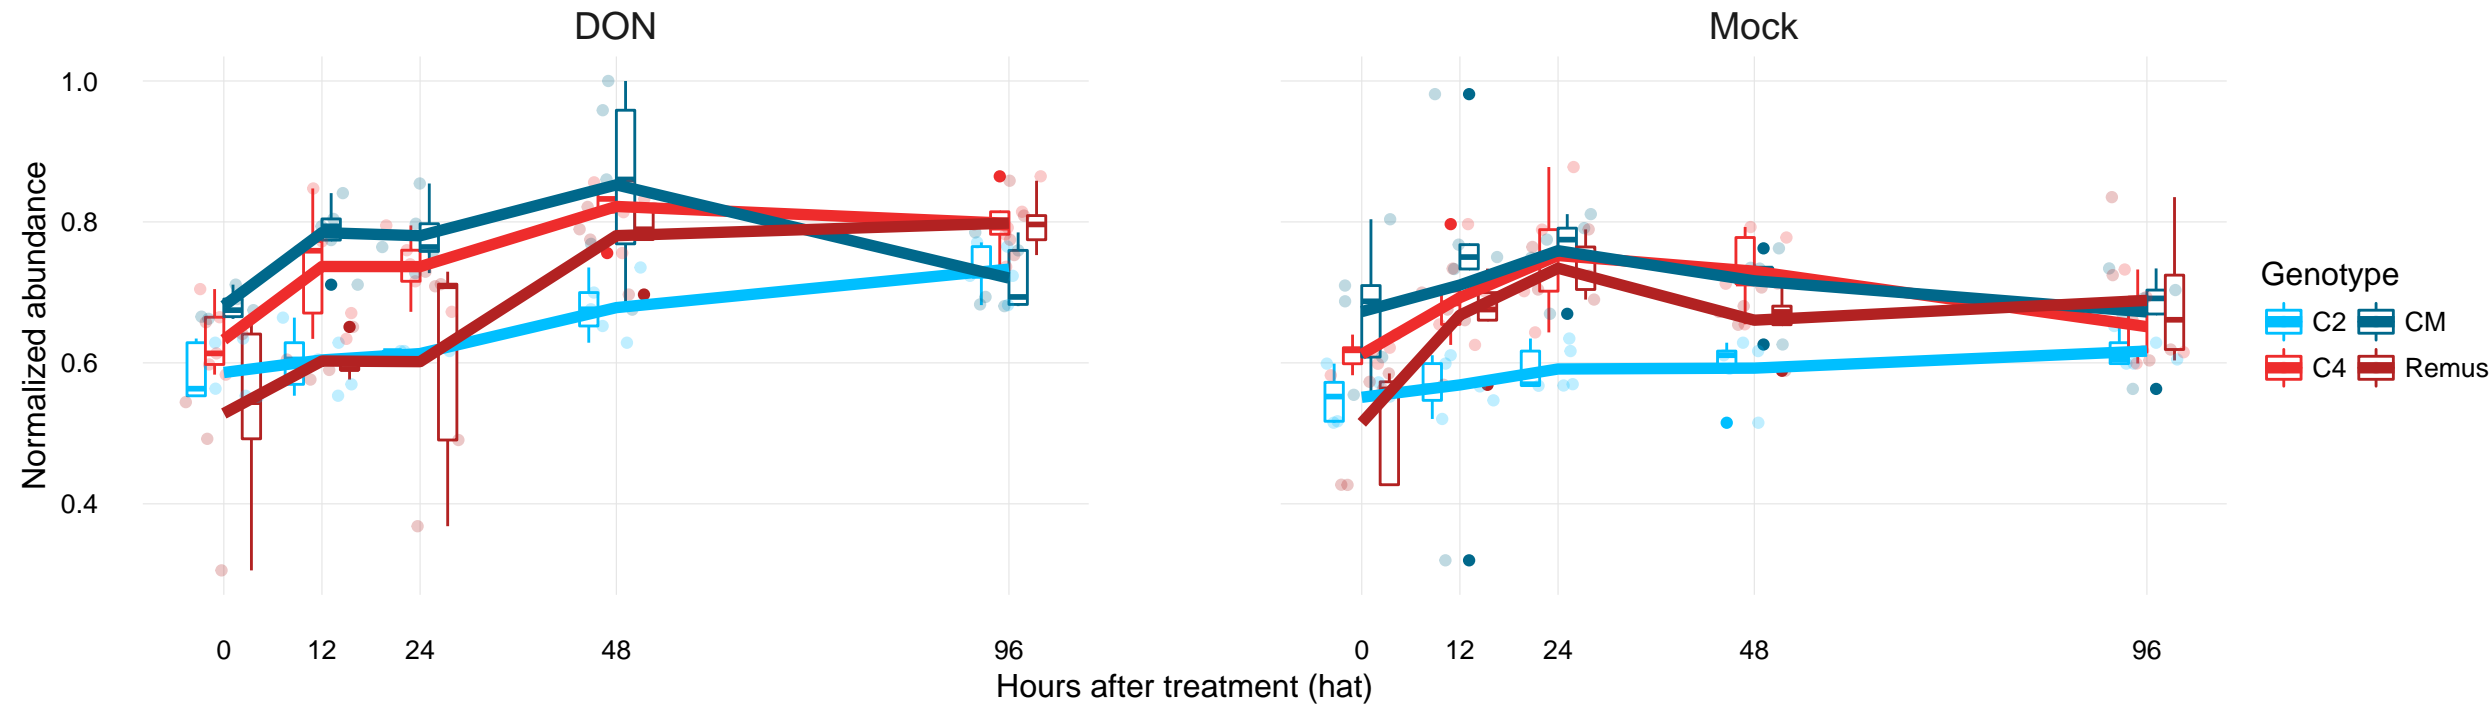

# A.67

Annotated as HCA derivative  
(1 database hit)

|                |                                                |
|----------------|------------------------------------------------|
| MZ             | 411.1287                                       |
| RT             | 13.18 min                                      |
| Normalization  | Indirectly via surrogate<br>in the KPX samples |
| Cluster        | —                                              |
| Cn total / Phe | 19 / 9                                         |

## C2, C4; different treatments

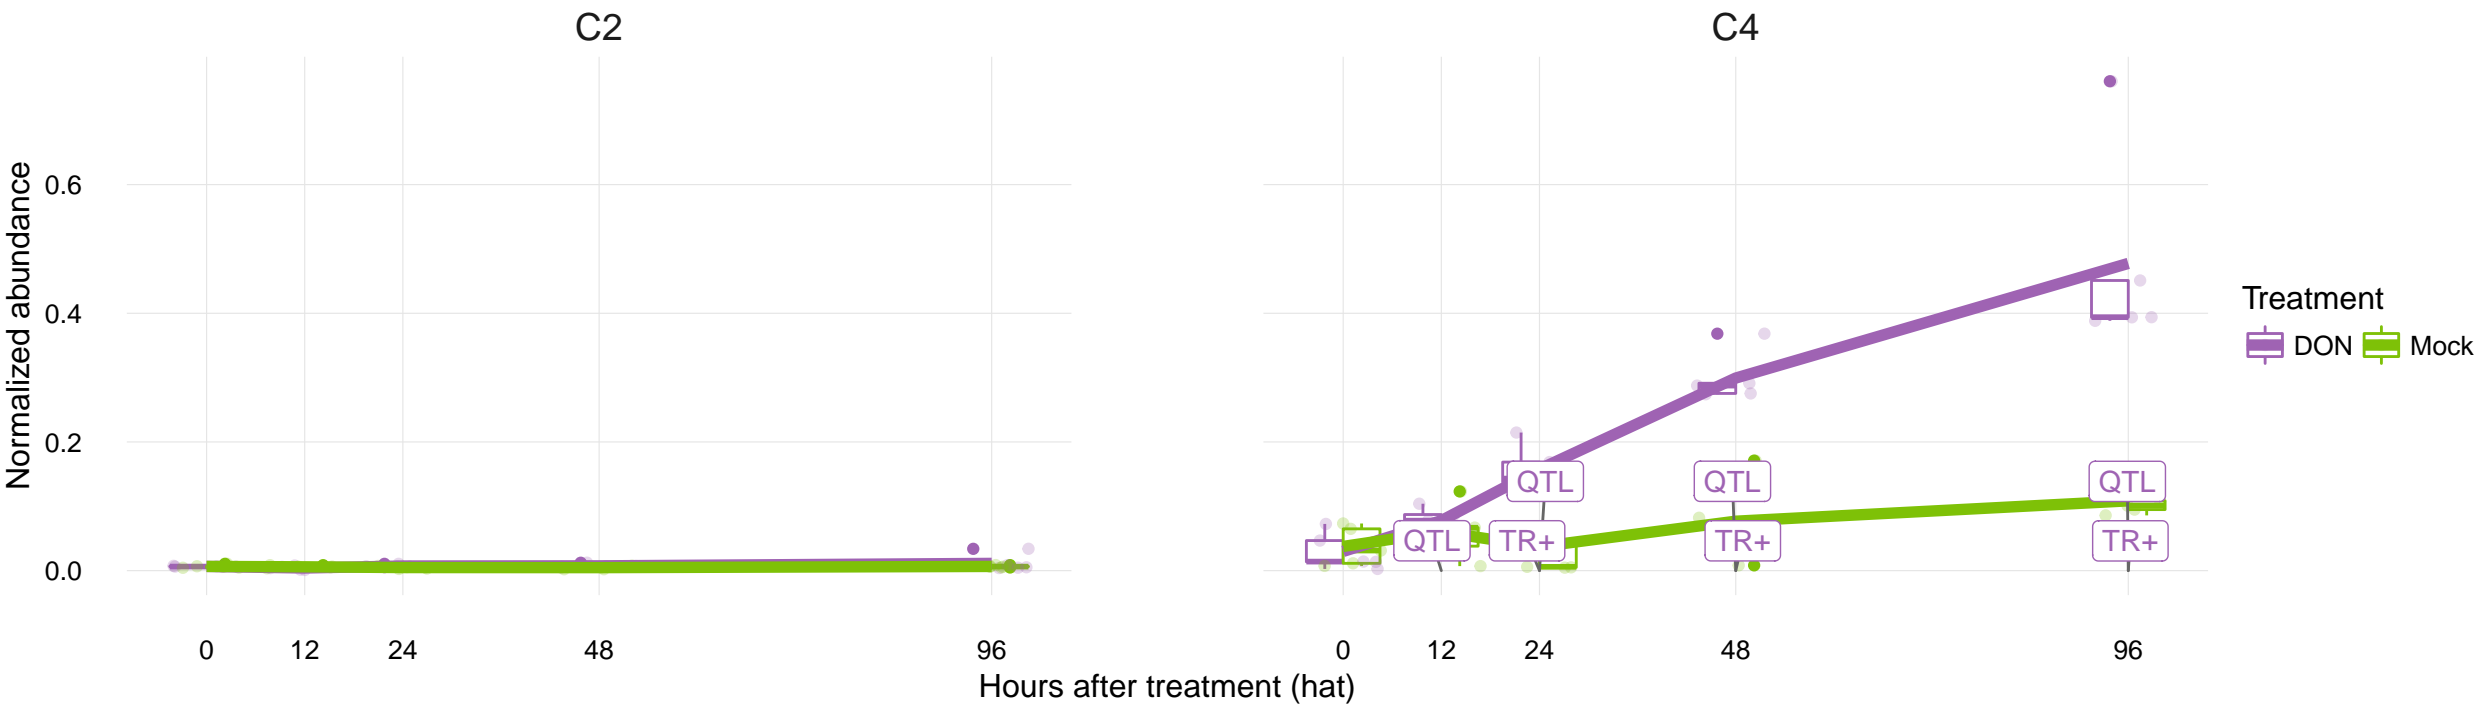

## DON, Mock; different genotypes

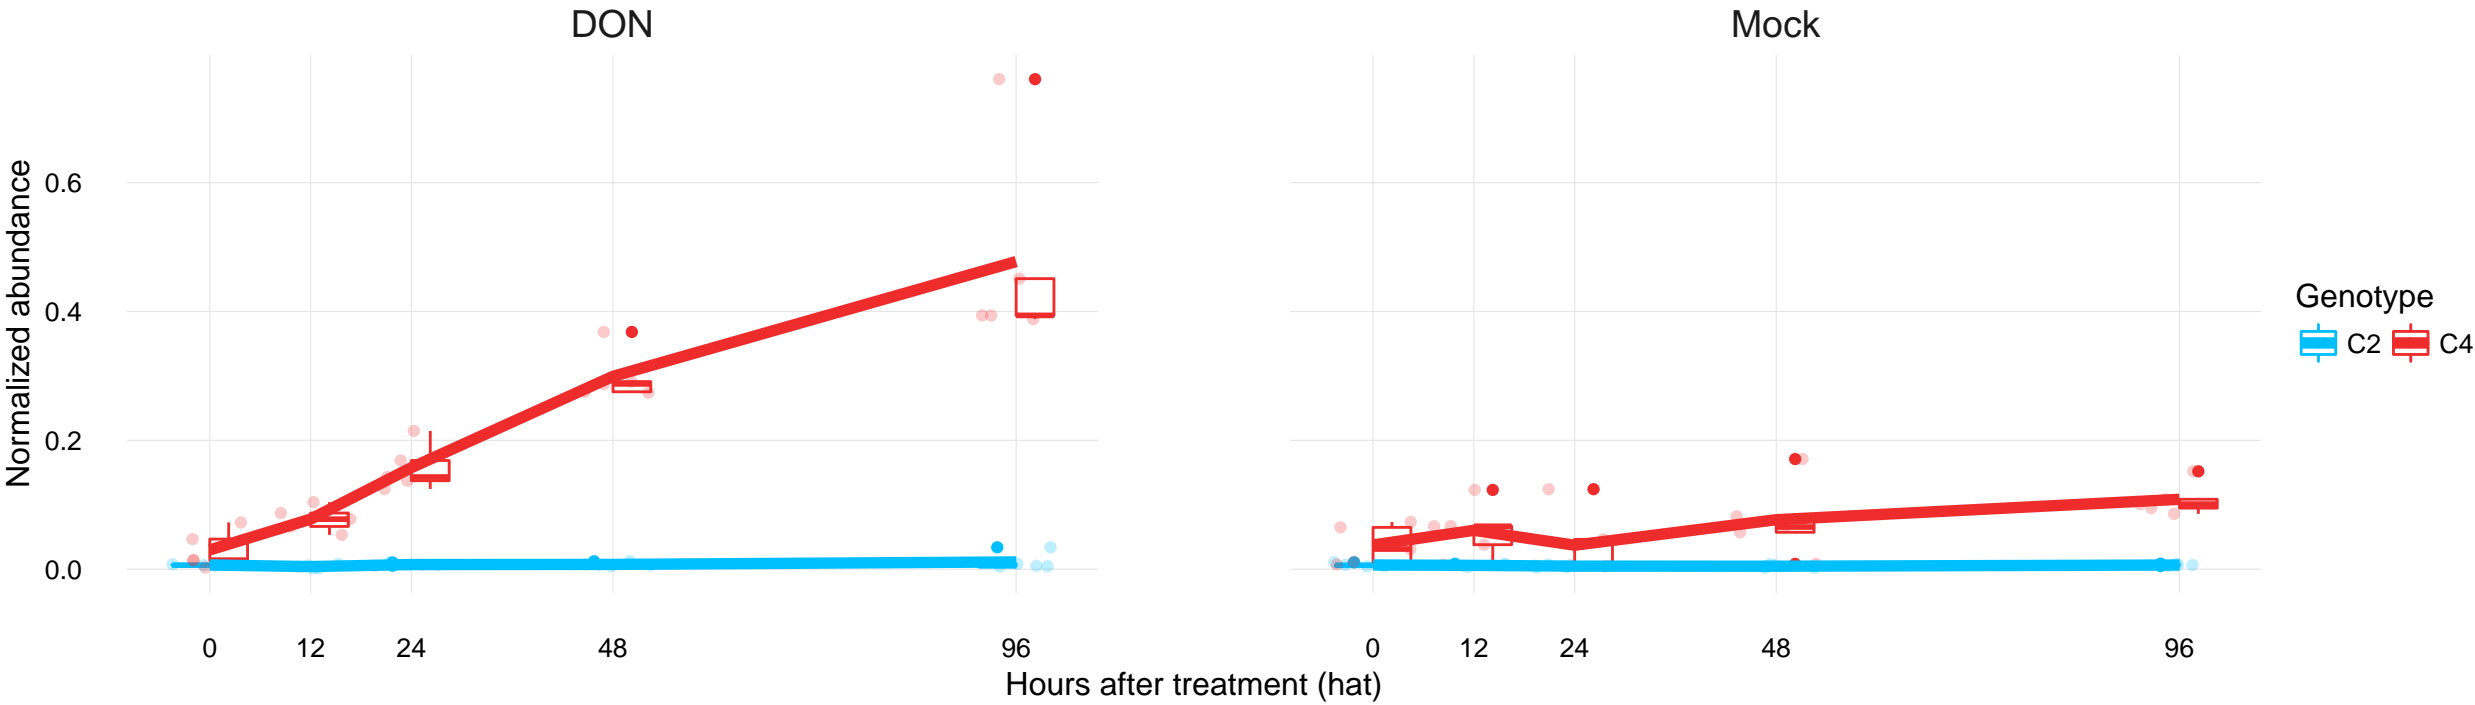

## CM, Remus; different treatments

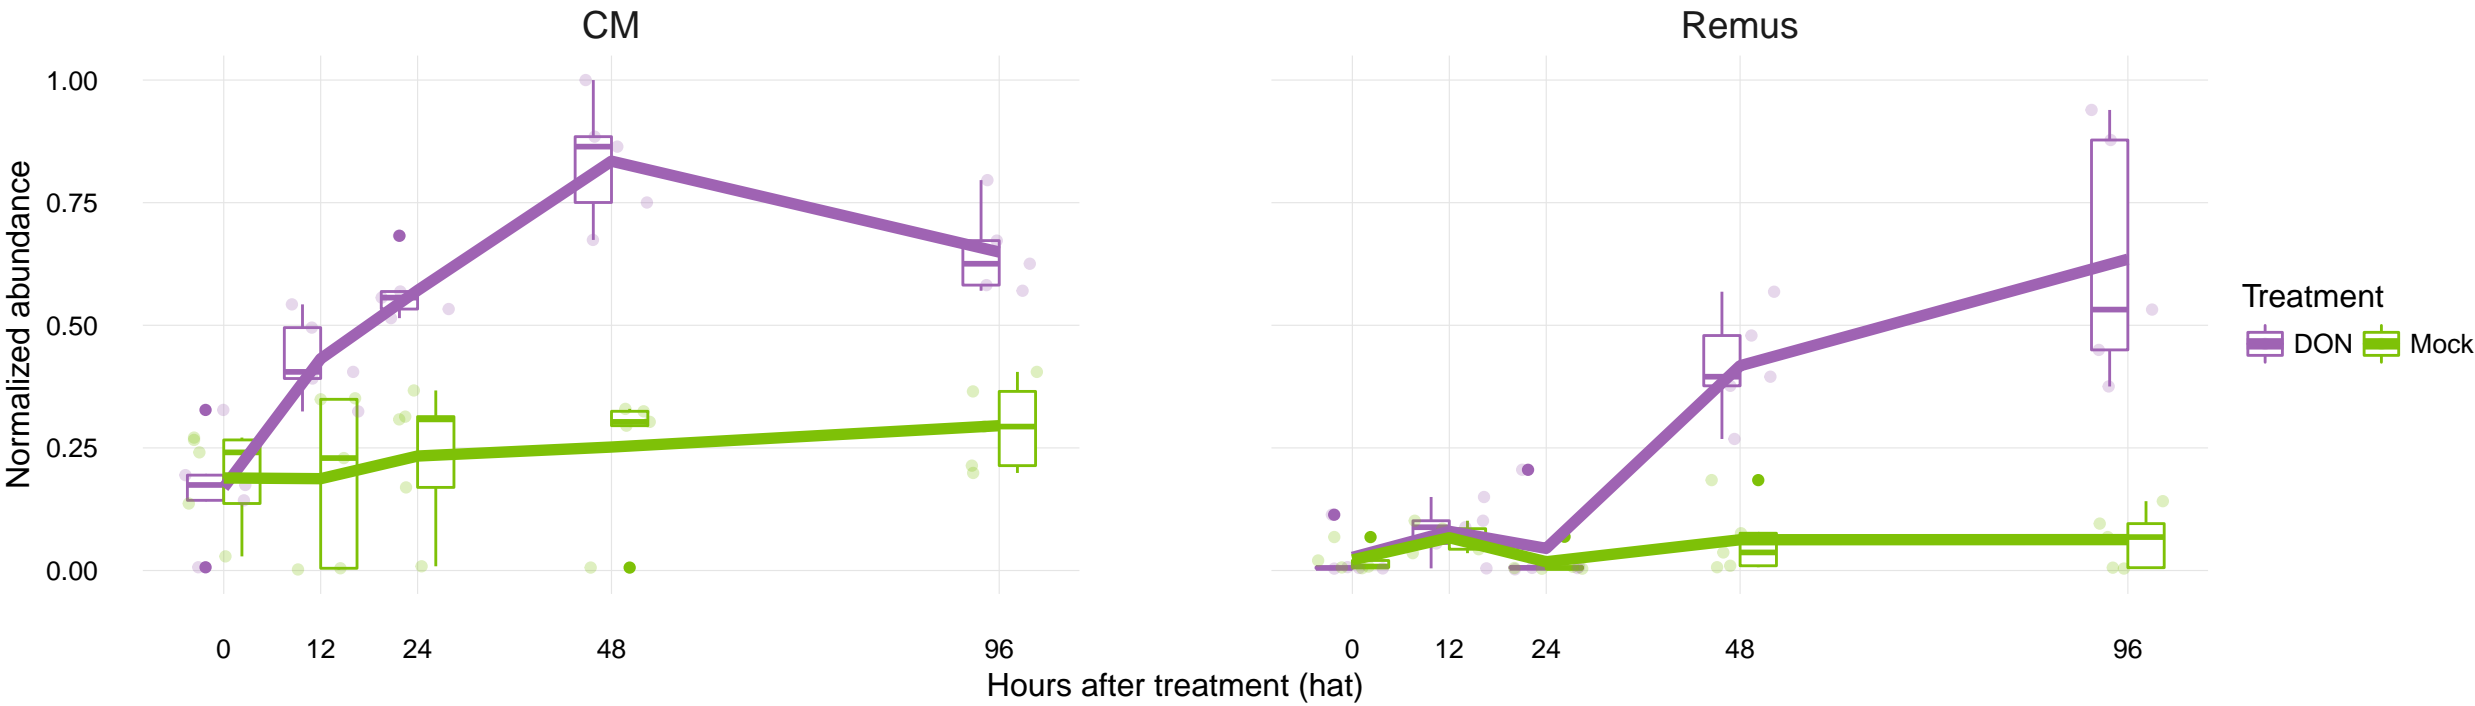

## DON, Mock; all four genotypes

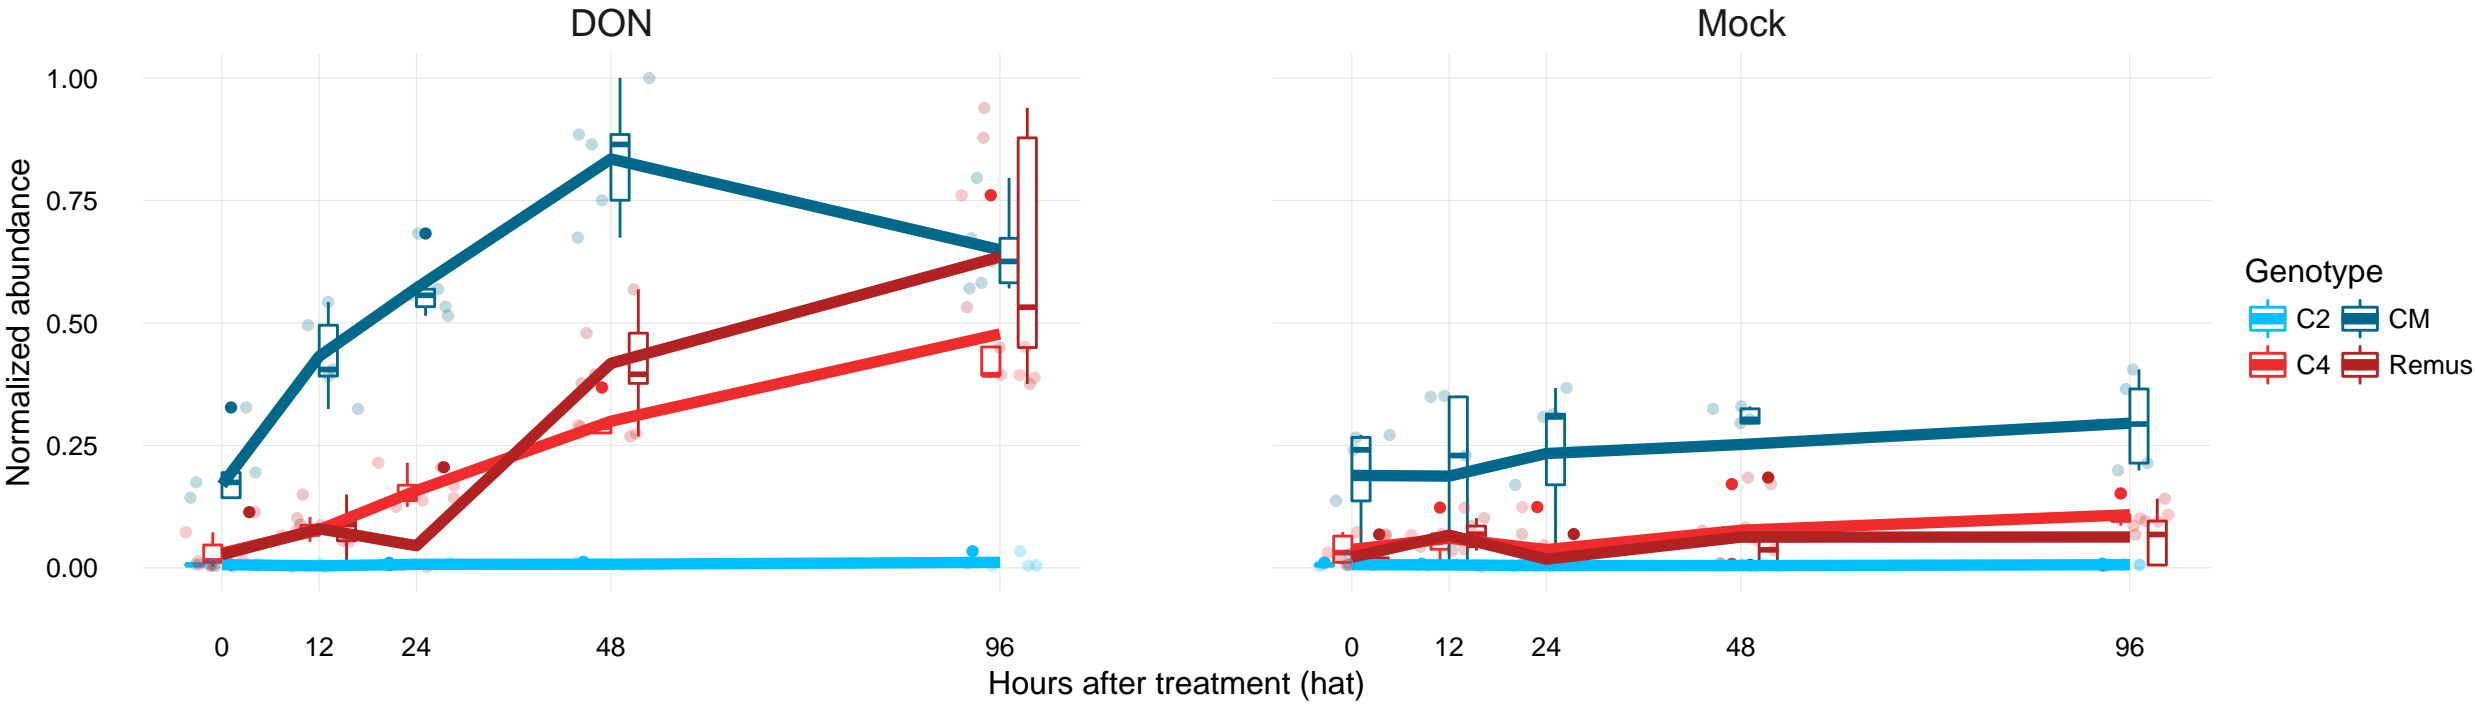



# A.59

Annotated as HCA derivative  
(1 database hit)

|                |                                                |
|----------------|------------------------------------------------|
| MZ             | 445.1343                                       |
| RT             | 12.78 min                                      |
| Normalization  | Indirectly via surrogate<br>in the KPX samples |
| Cluster        | —                                              |
| Cn total / Phe | 19 / 9                                         |

## C2, C4; different treatments

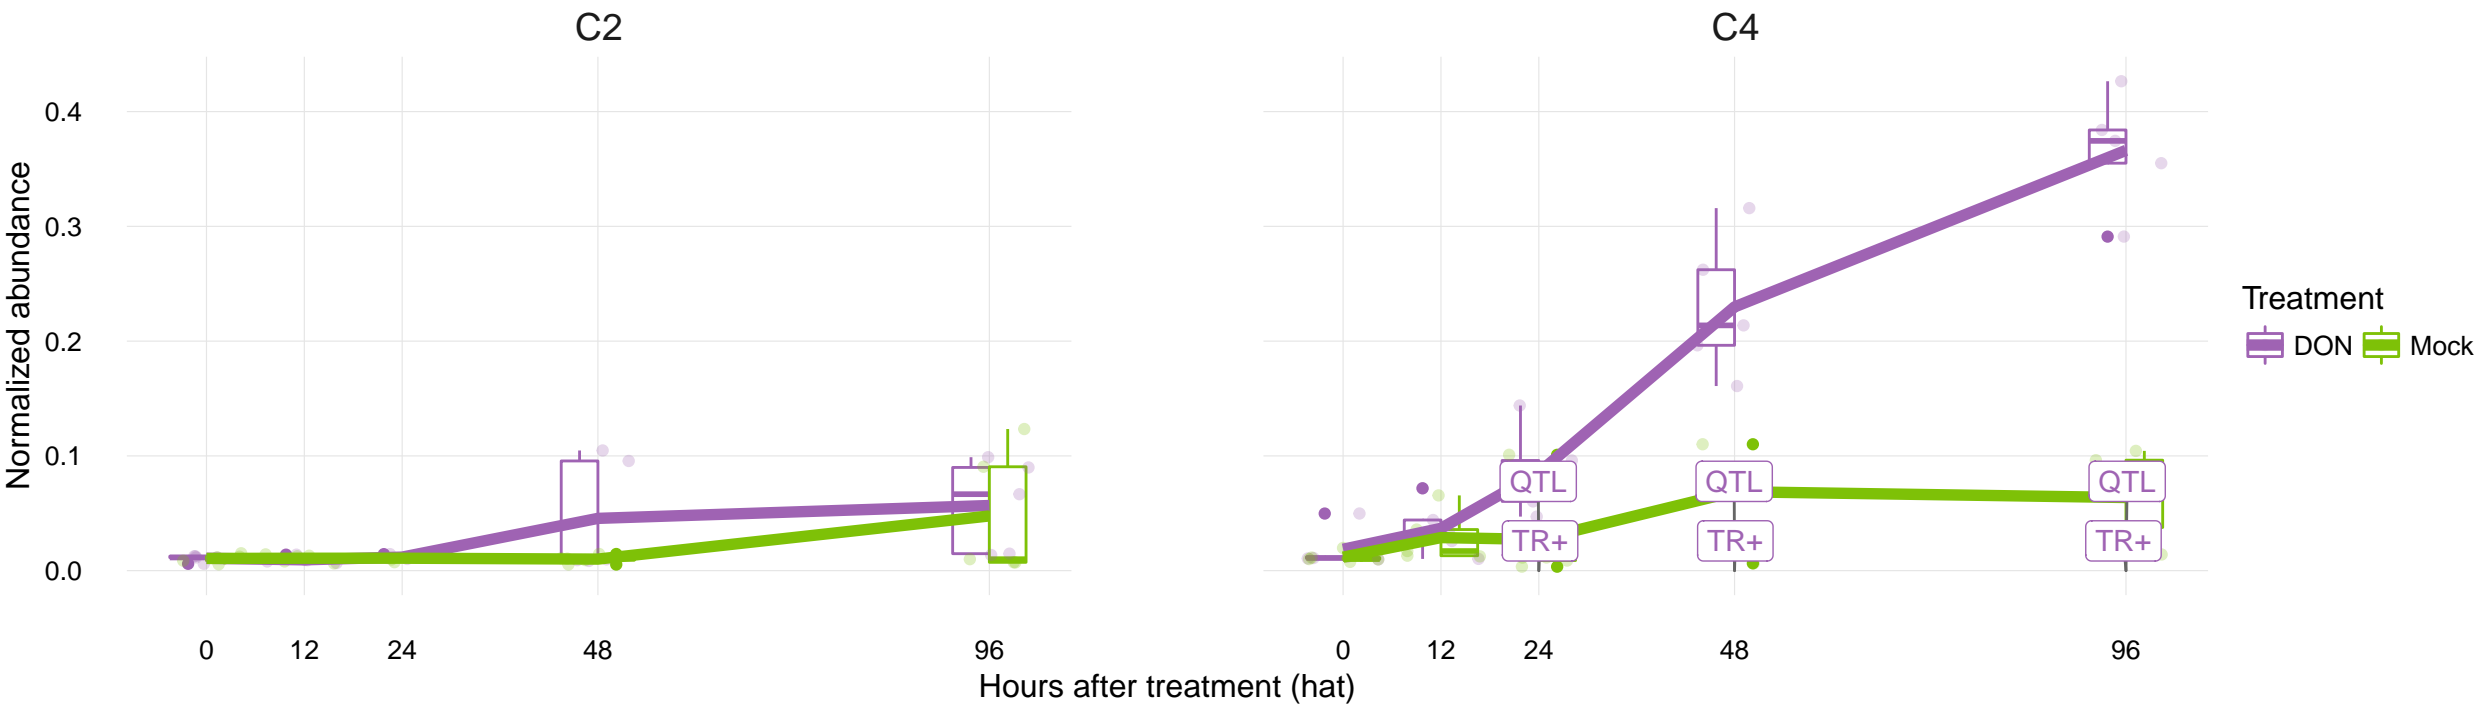

## DON, Mock; different genotypes

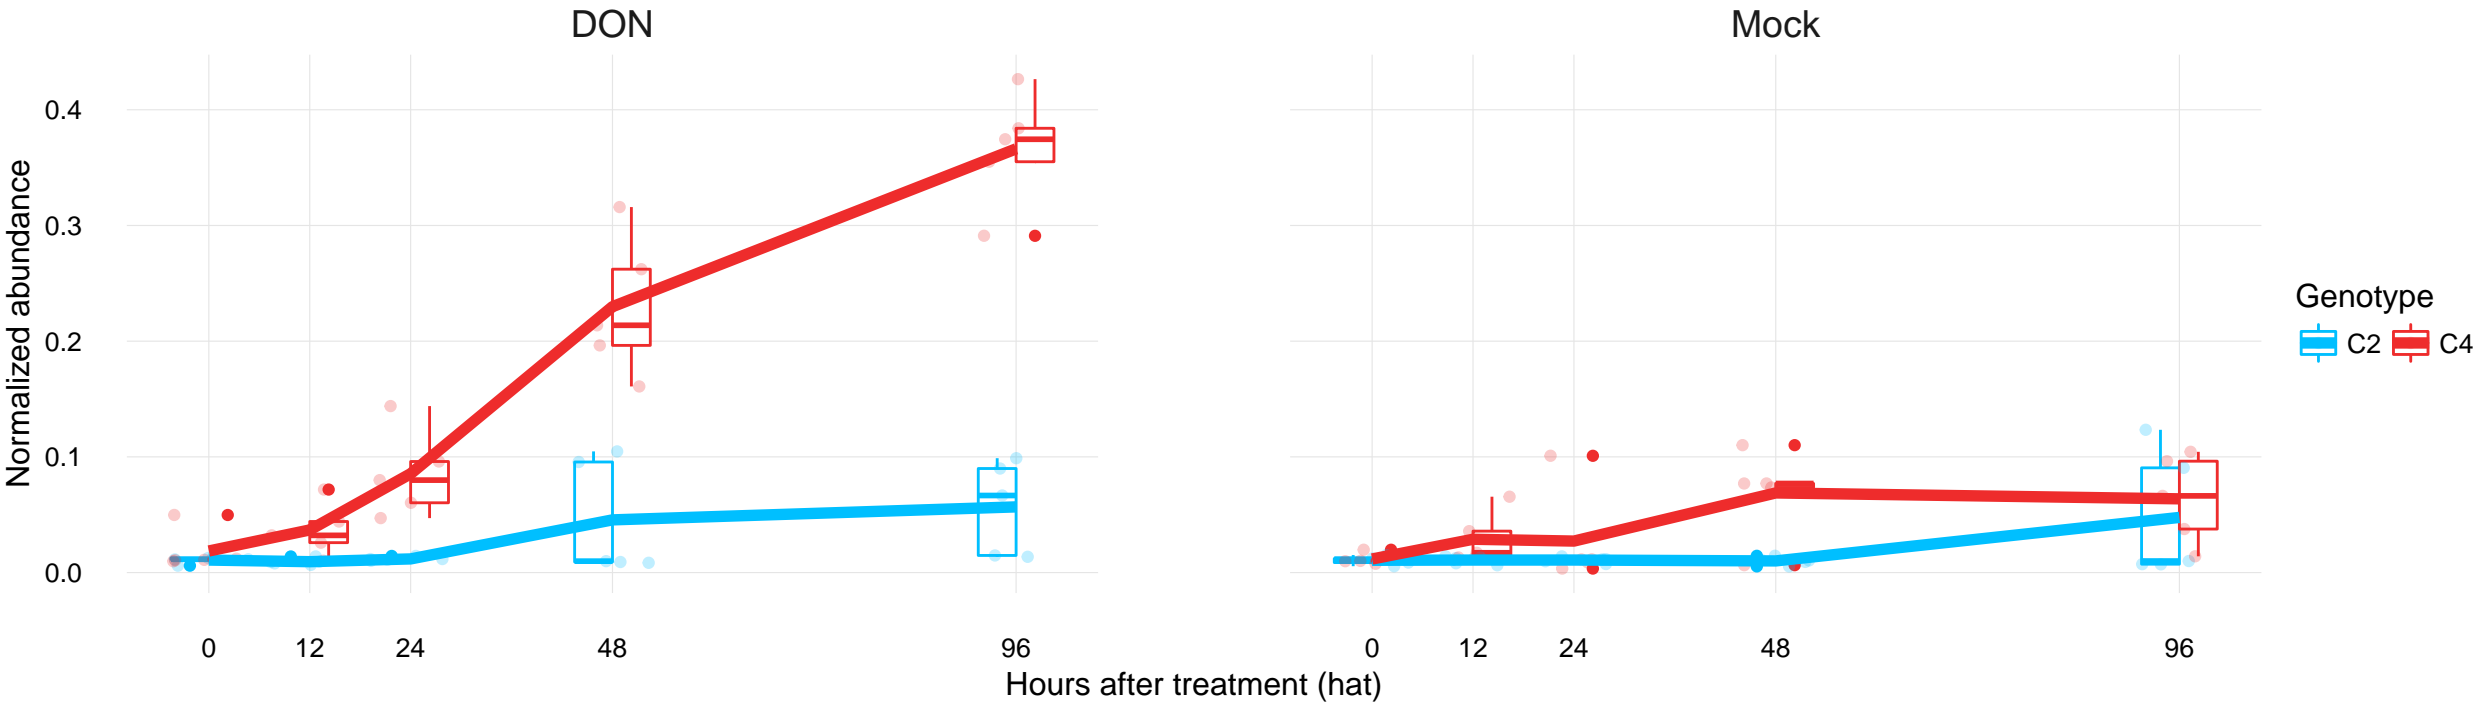

## CM, Remus; different treatments

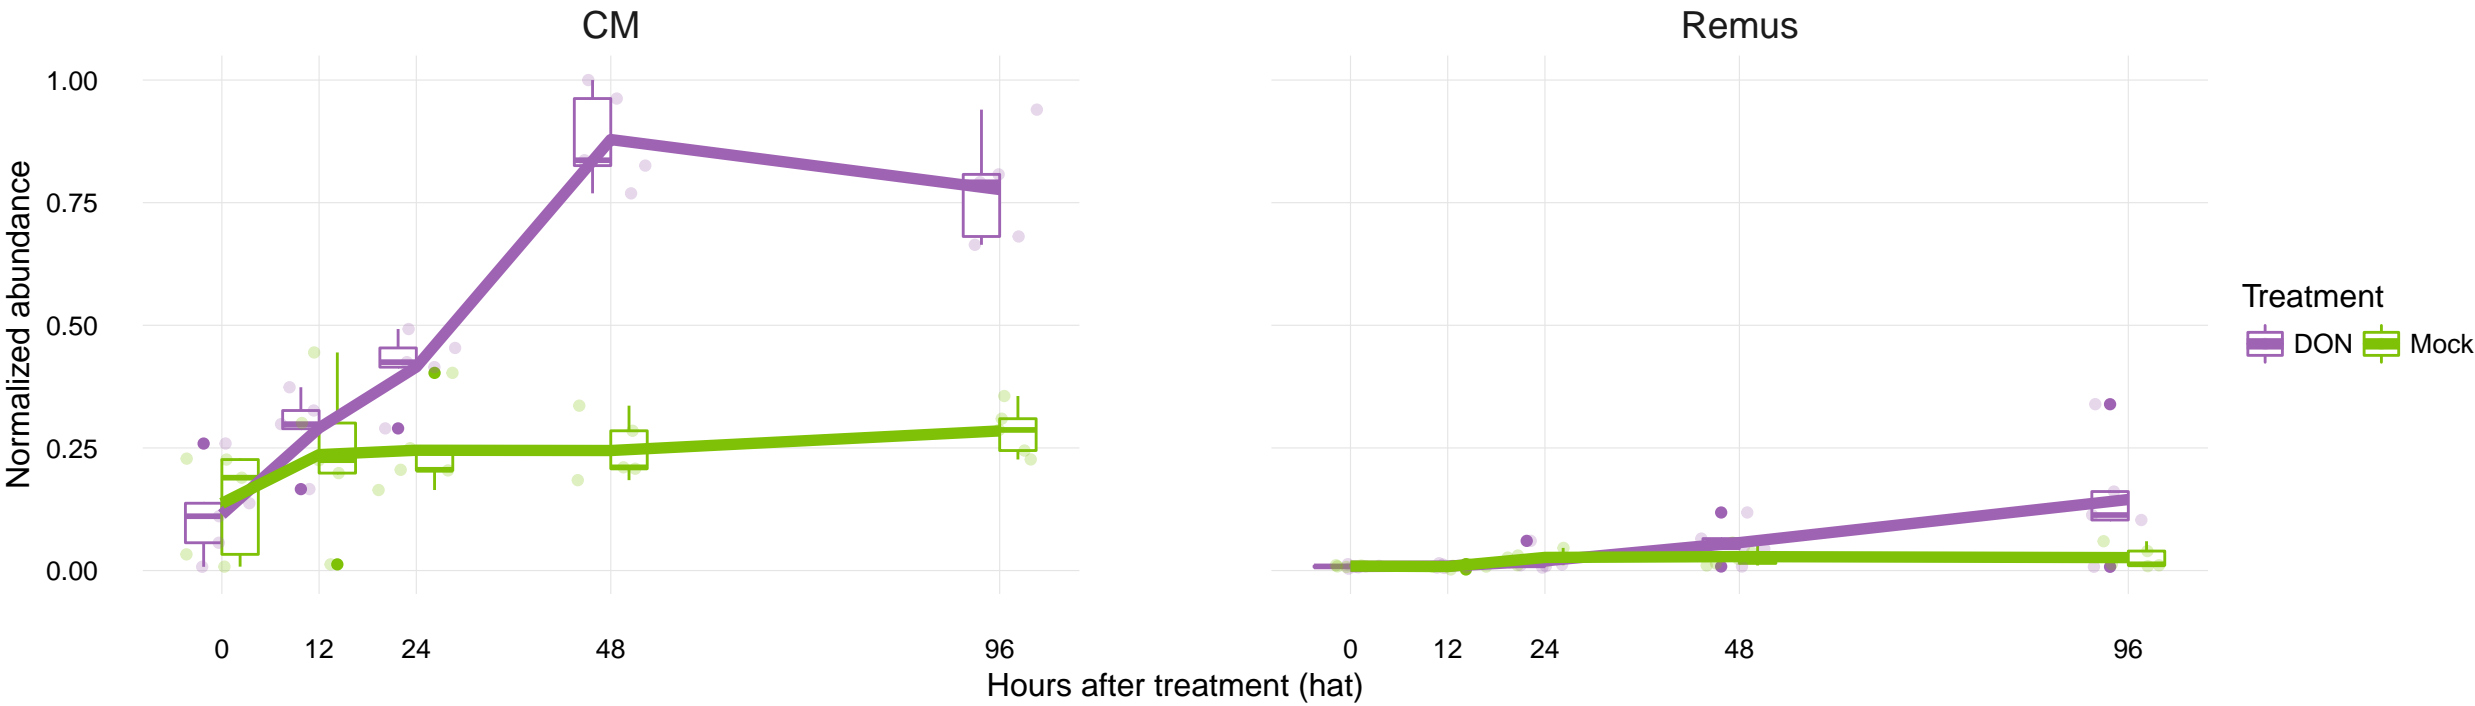

## DON, Mock; all four genotypes

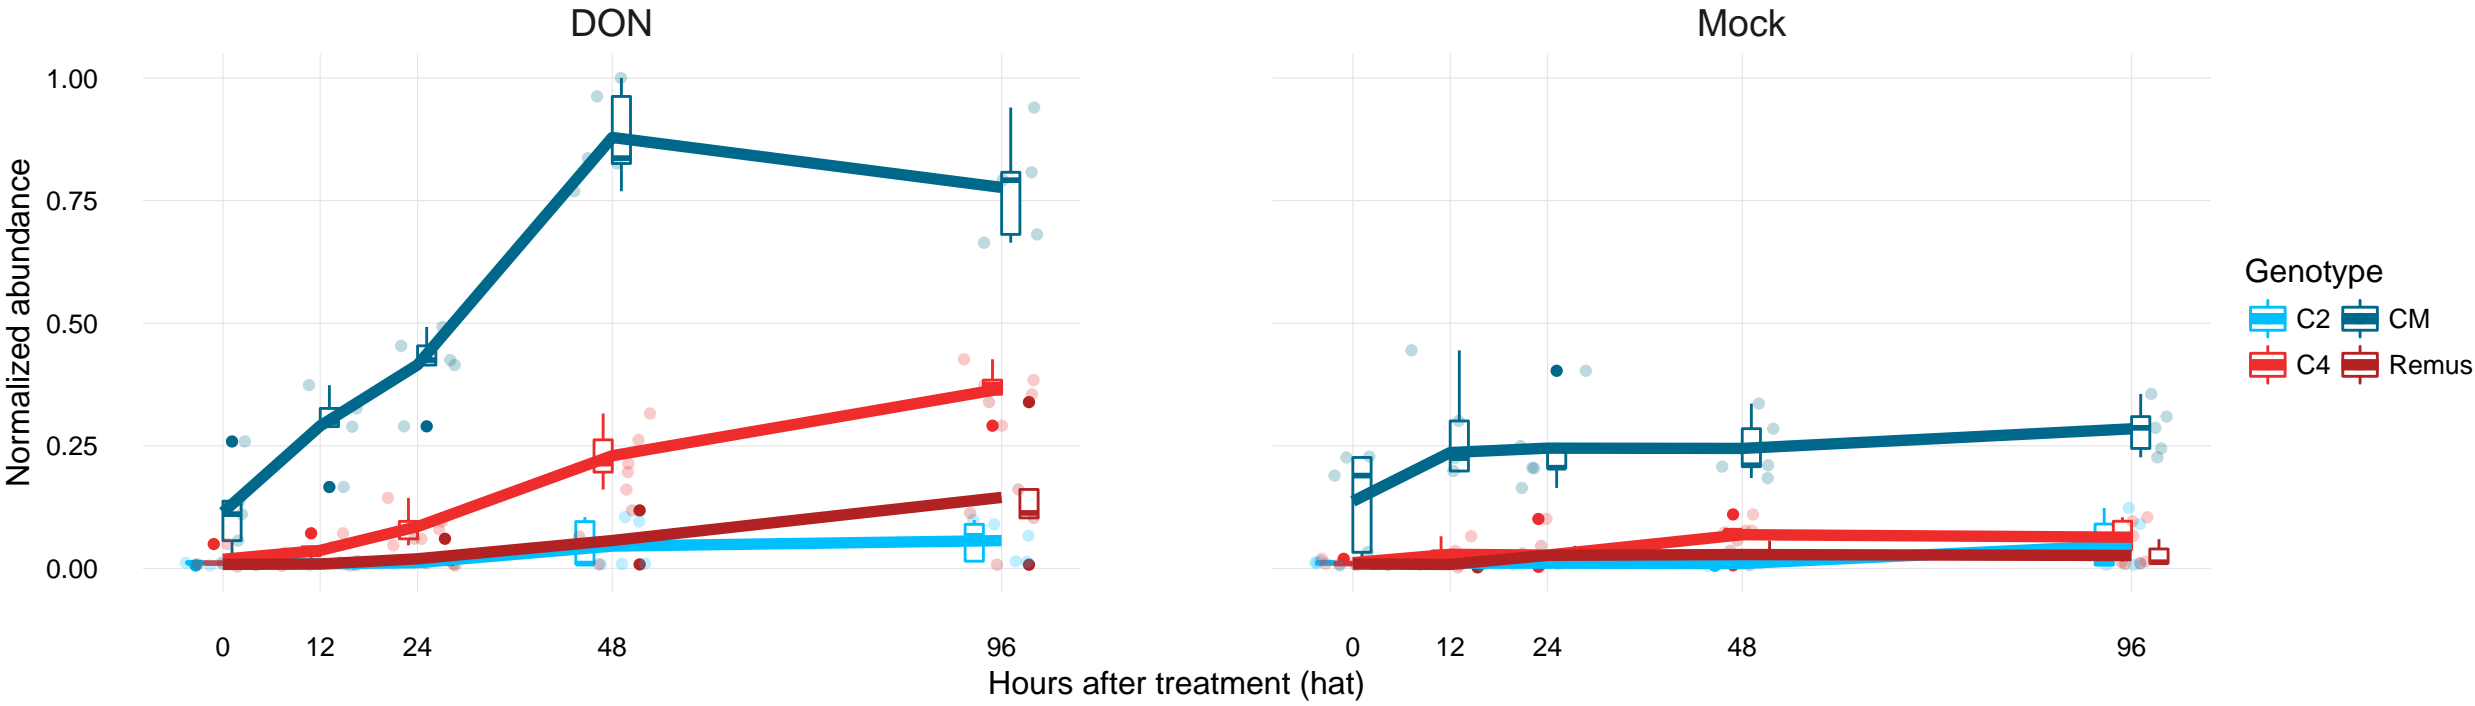



# A.74

Annotated as Lignan  
(2 database hits)

|                |                                                |
|----------------|------------------------------------------------|
| MZ             | 538.2285                                       |
| RT             | 13.97 min                                      |
| Normalization  | Indirectly via surrogate<br>in the KPX samples |
| Cluster        | —                                              |
| Cn total / Phe | 26 / 18                                        |

## C2, C4; different treatments

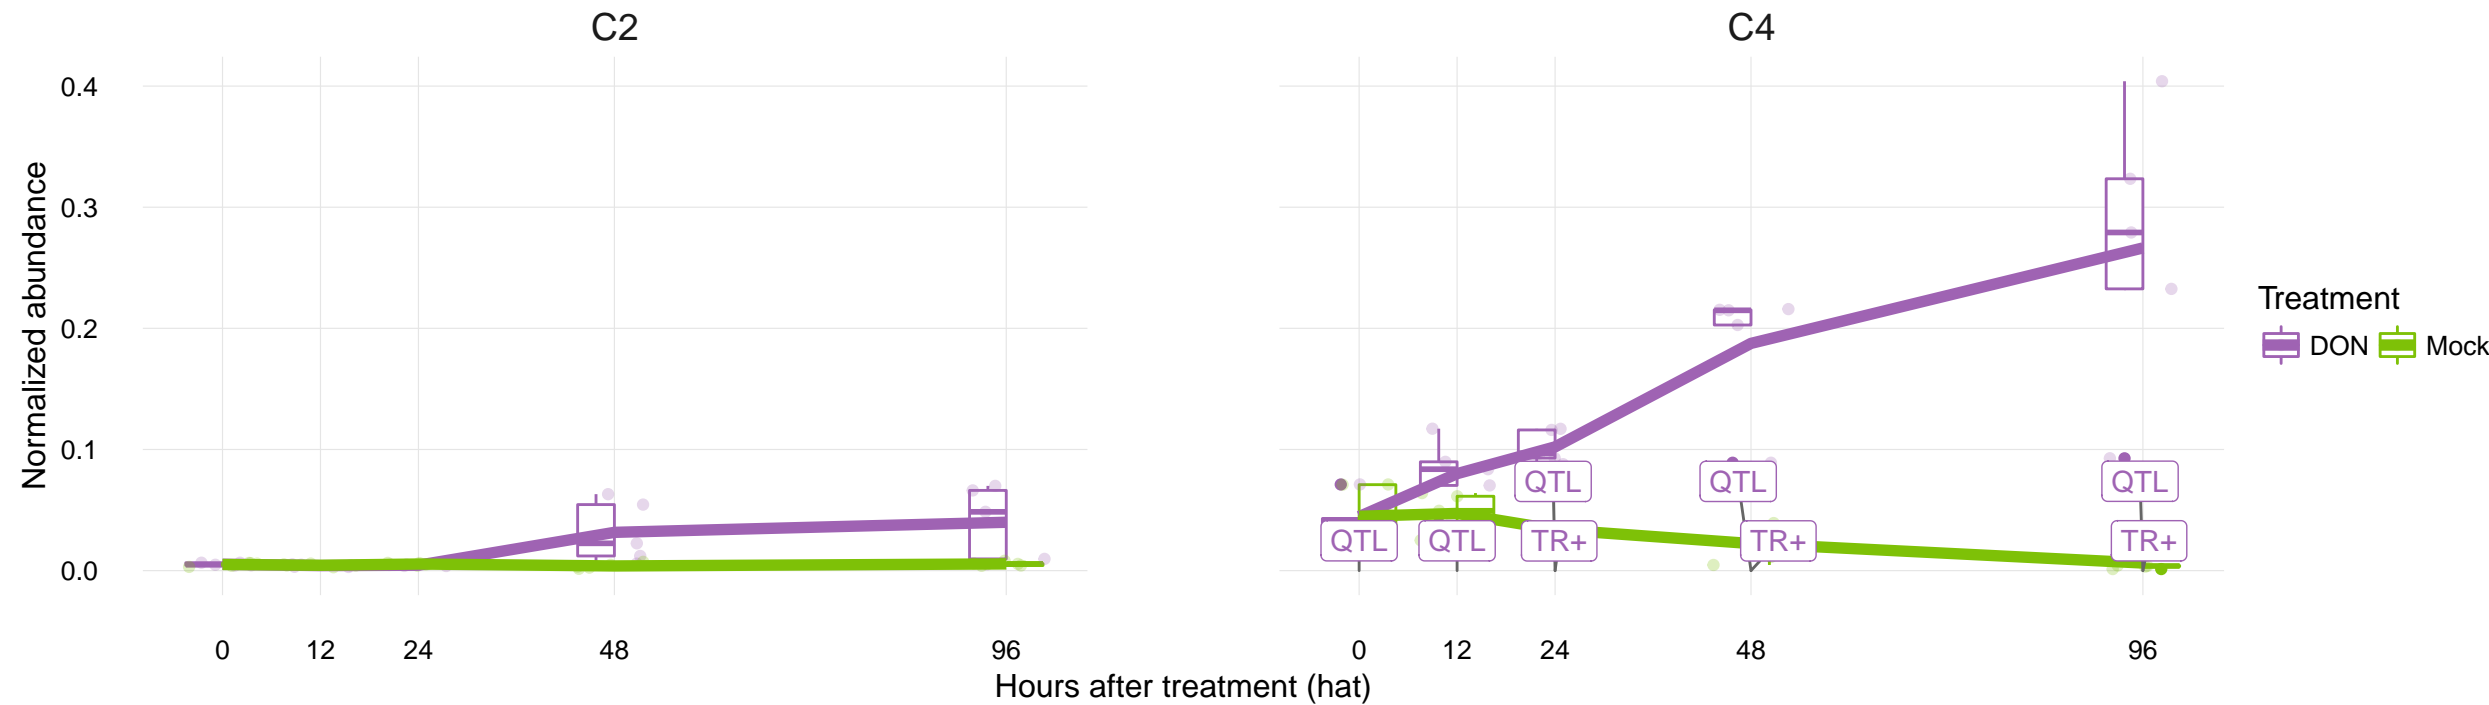

## DON, Mock; different genotypes

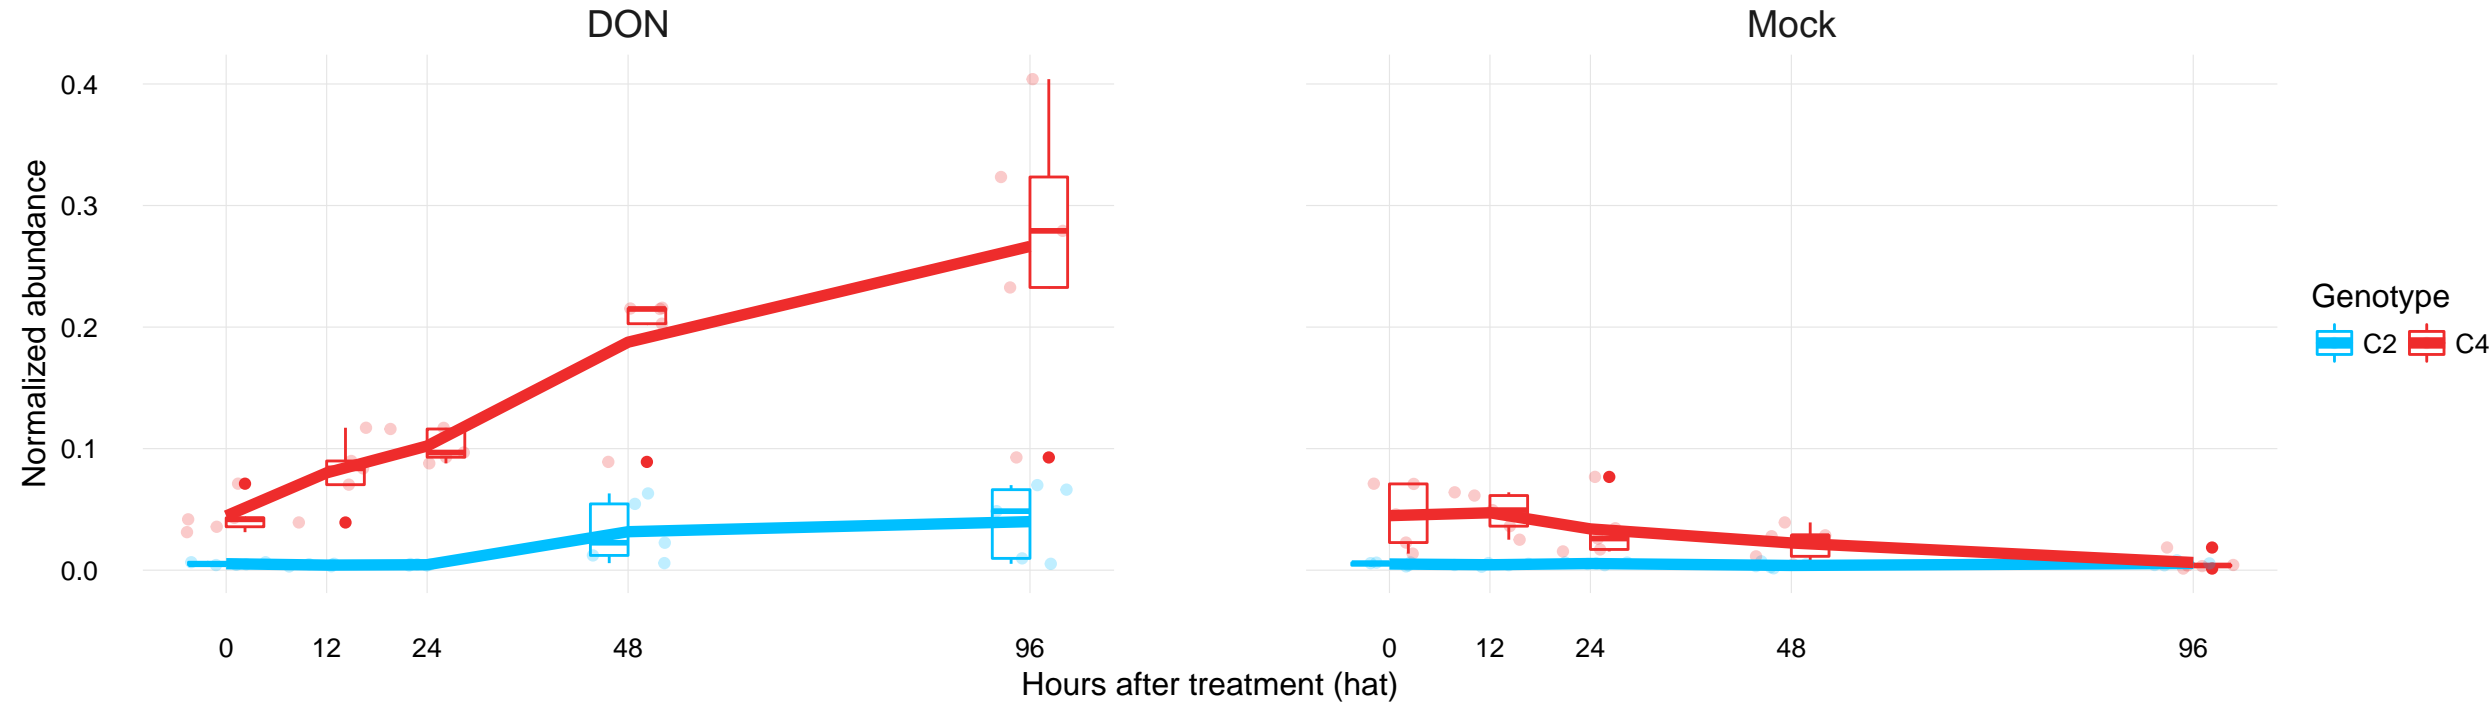

## CM, Remus; different treatments

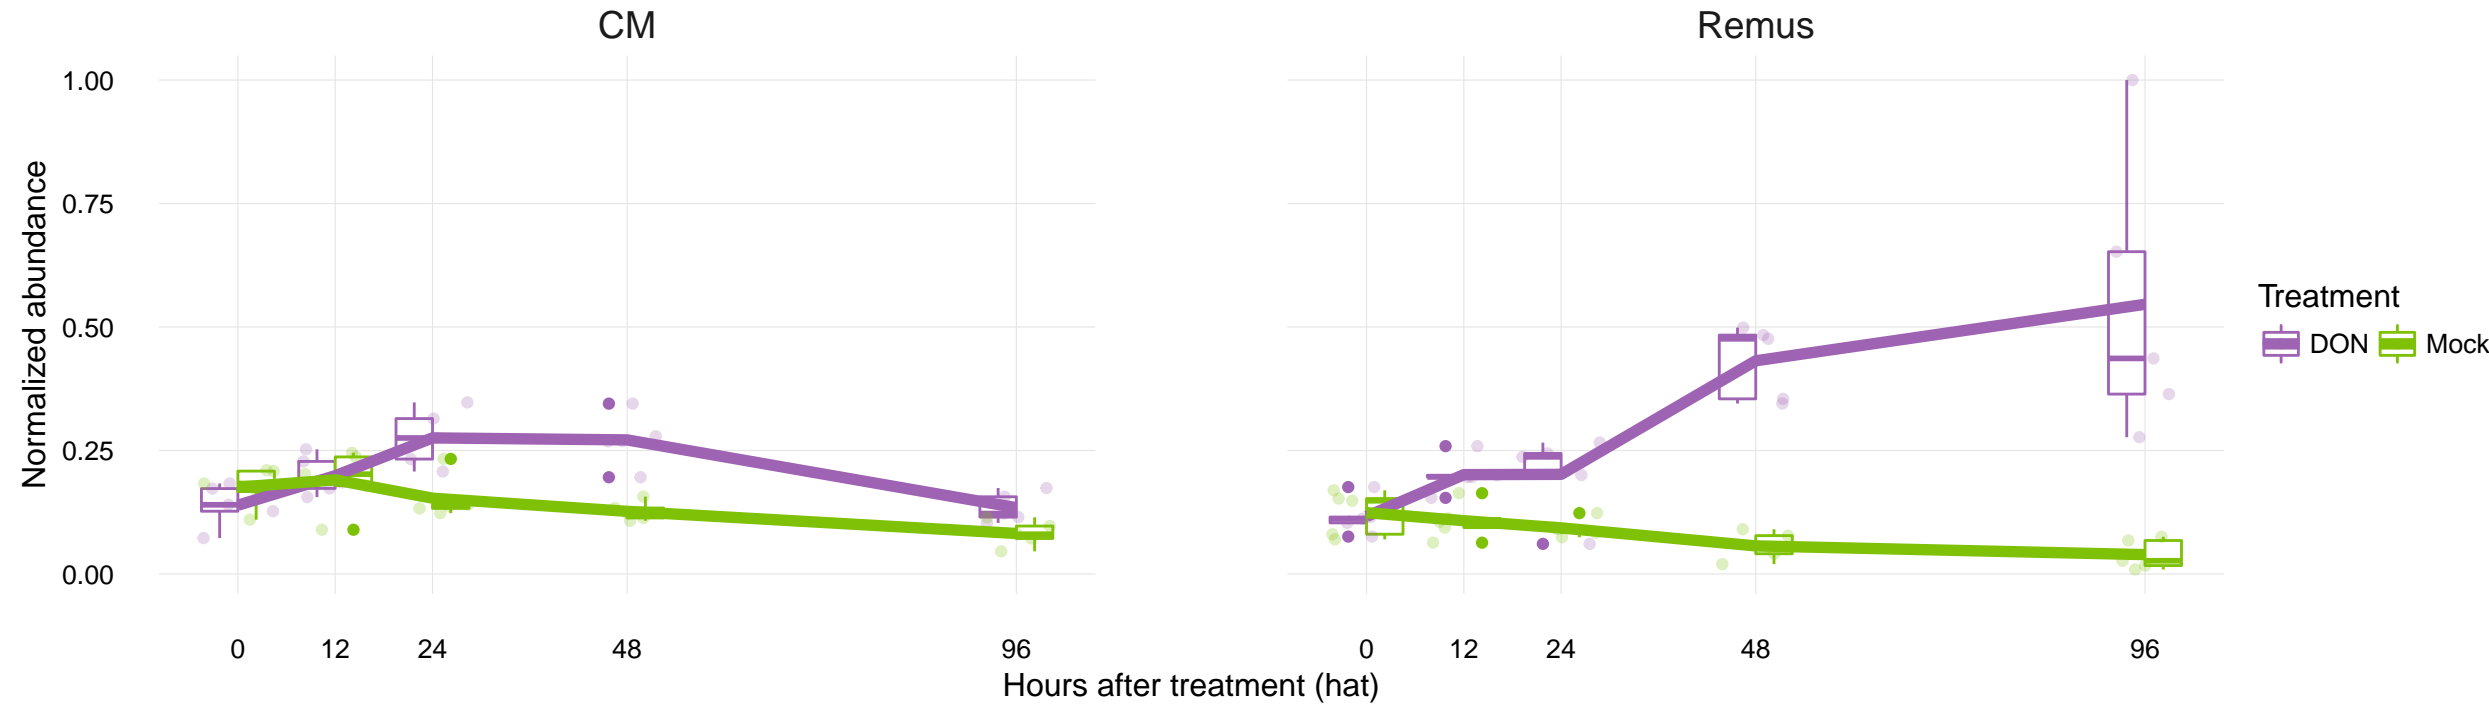

## DON, Mock; all four genotypes

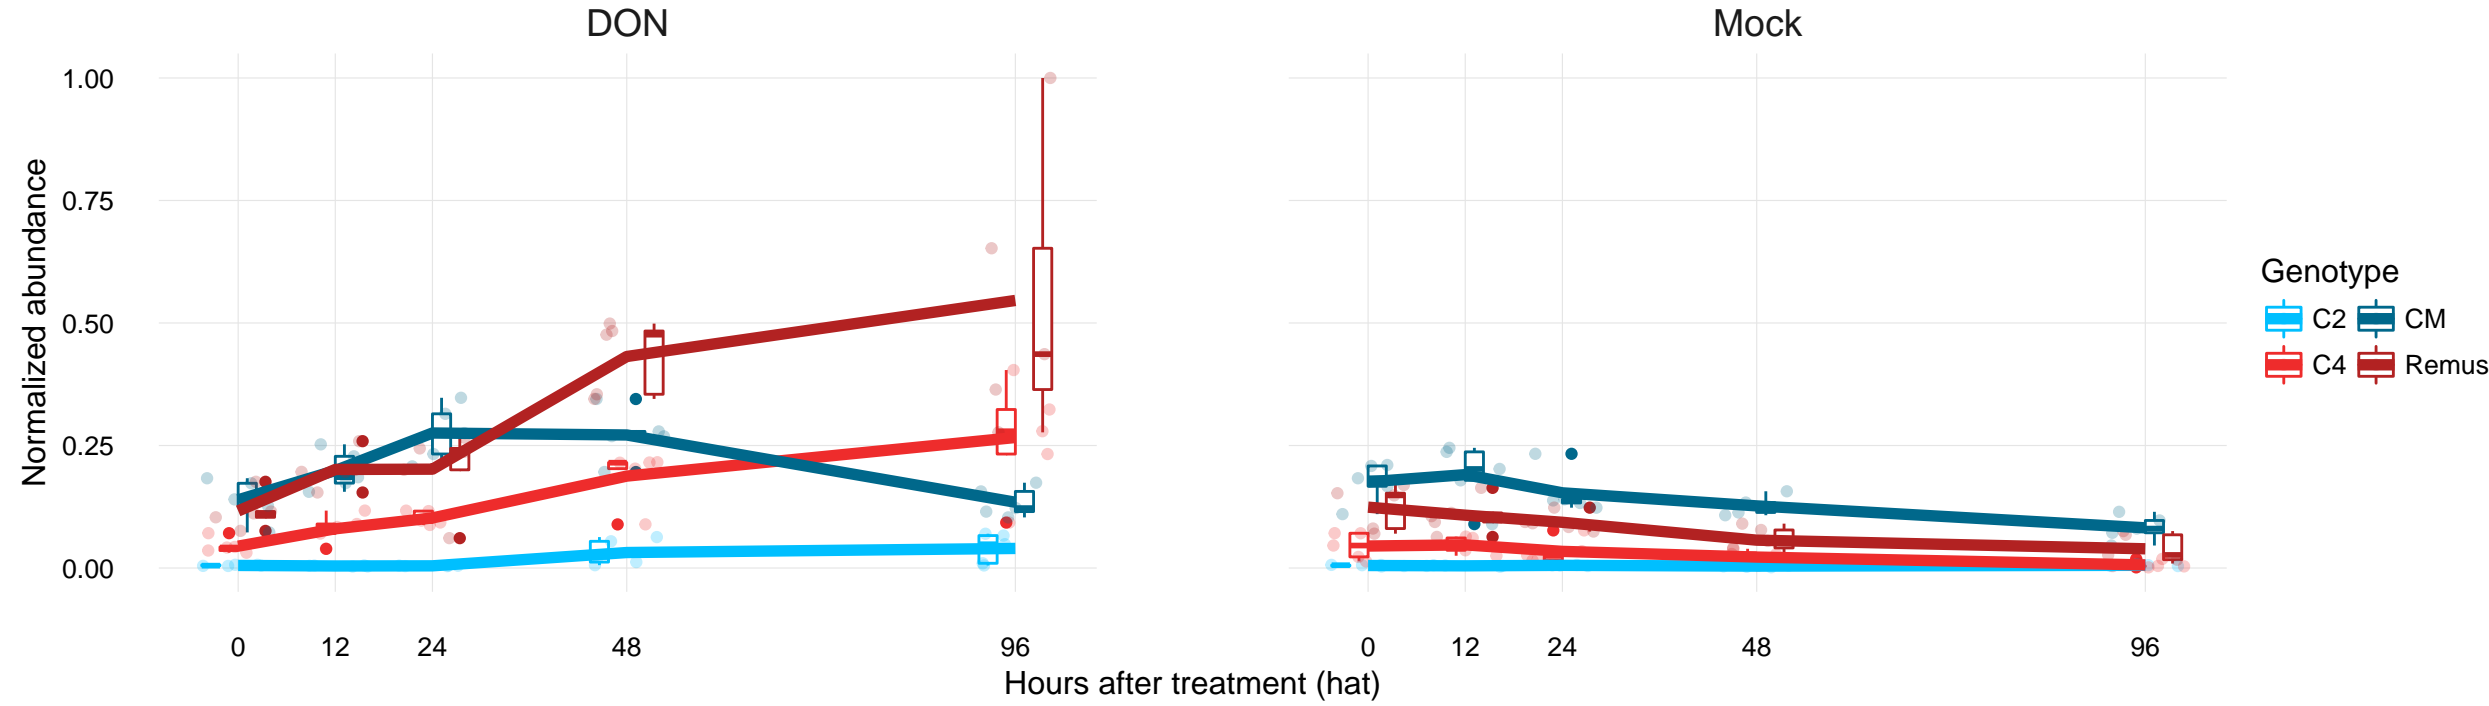

# A.79

Annotated as Lignan  
(1 database hit)

|                |                                                |
|----------------|------------------------------------------------|
| MZ             | 540.2441                                       |
| RT             | 14.25 min                                      |
| Normalization  | Indirectly via surrogate<br>in the KPX samples |
| Cluster        | —                                              |
| Cn total / Phe | 26 / 18                                        |

## C2, C4; different treatments

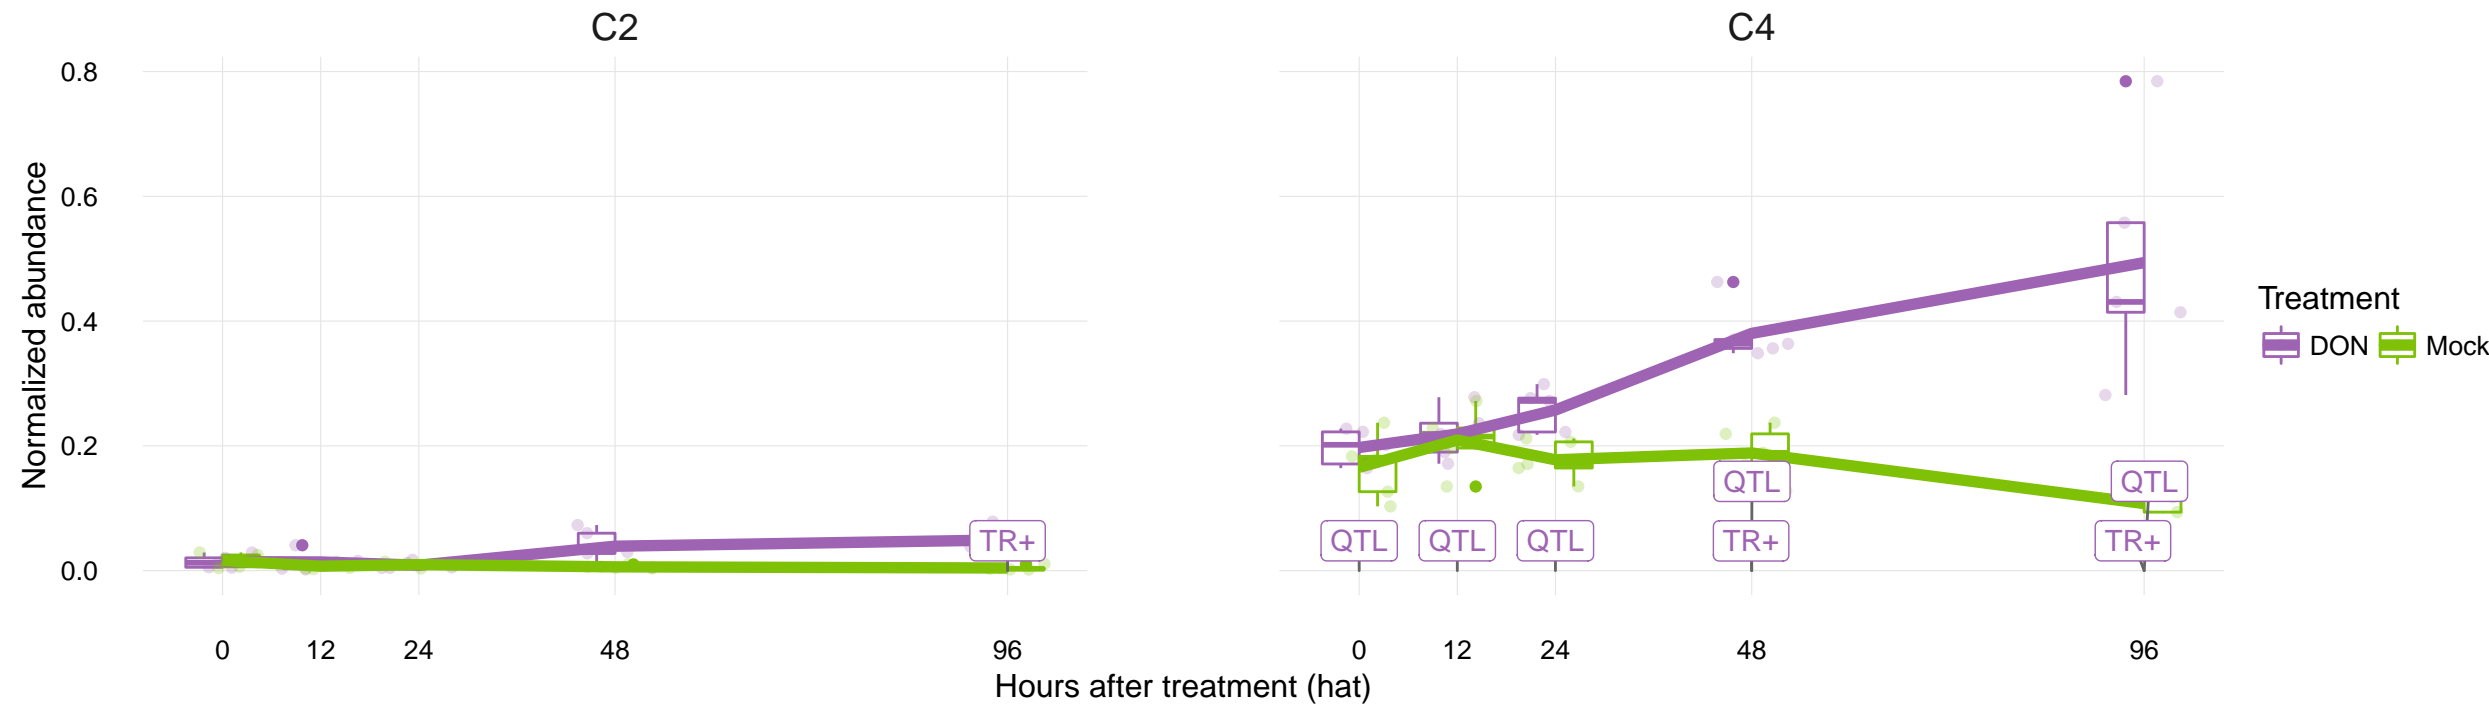

## DON, Mock; different genotypes

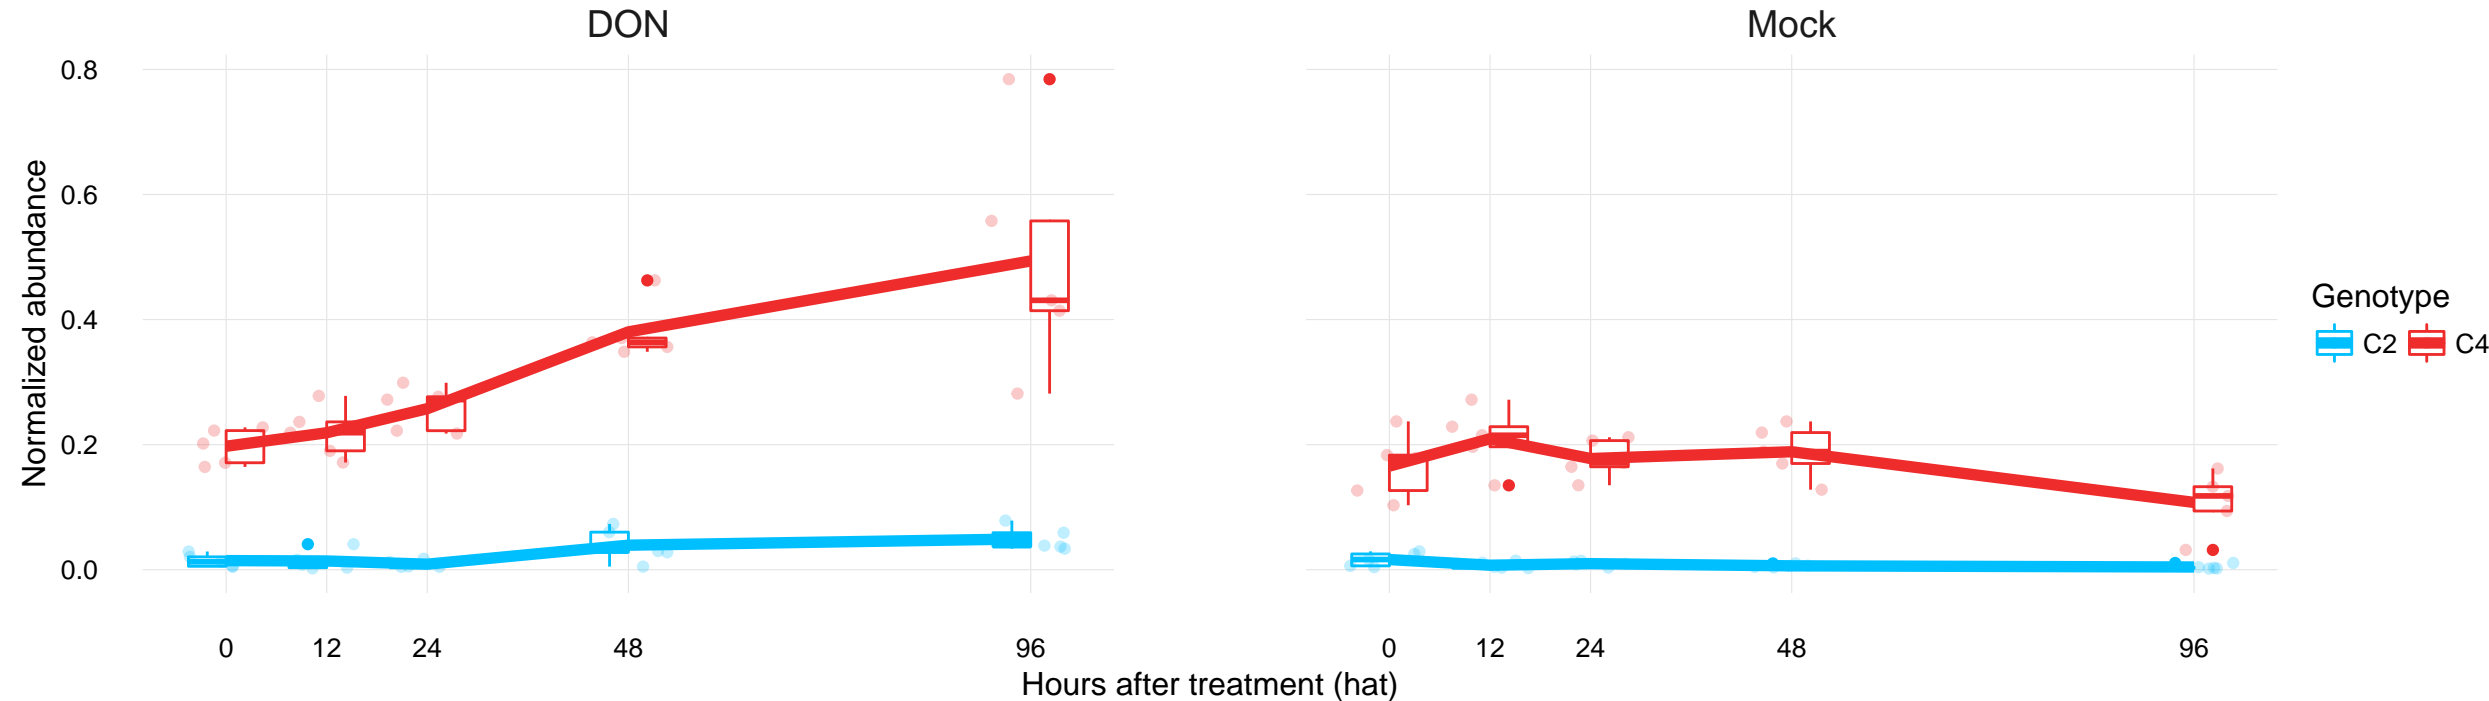

## CM, Remus; different treatments

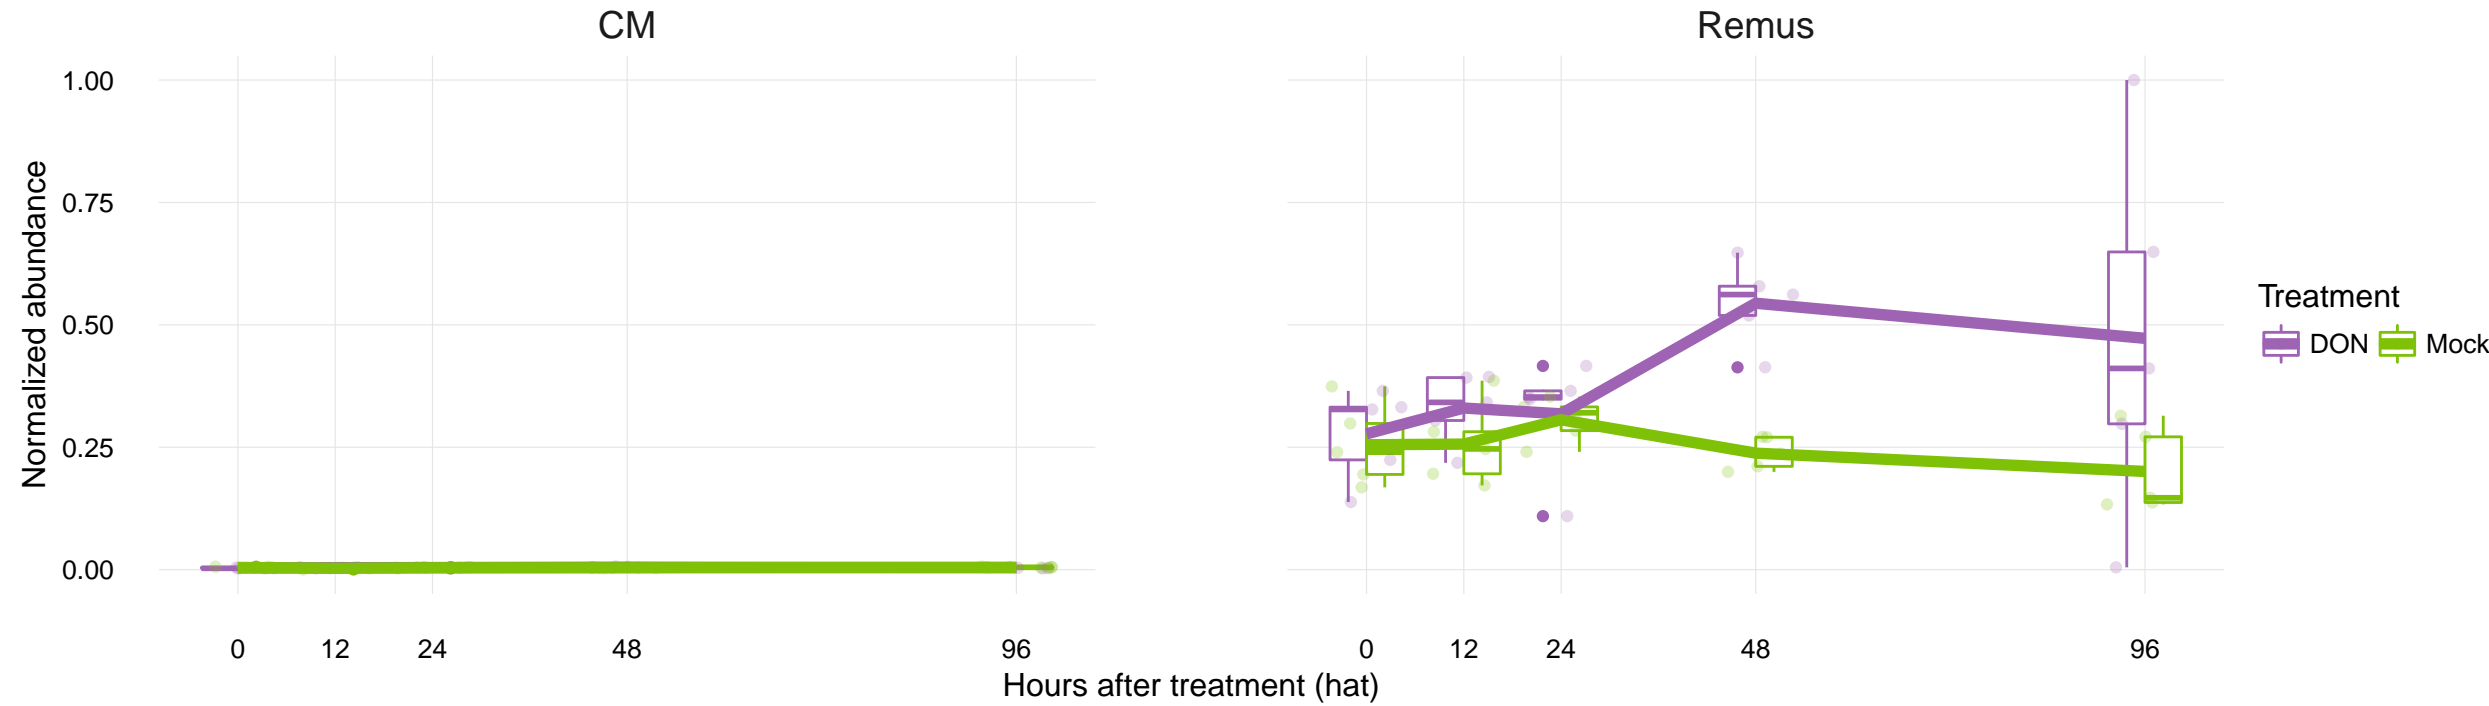

## DON, Mock; all four genotypes

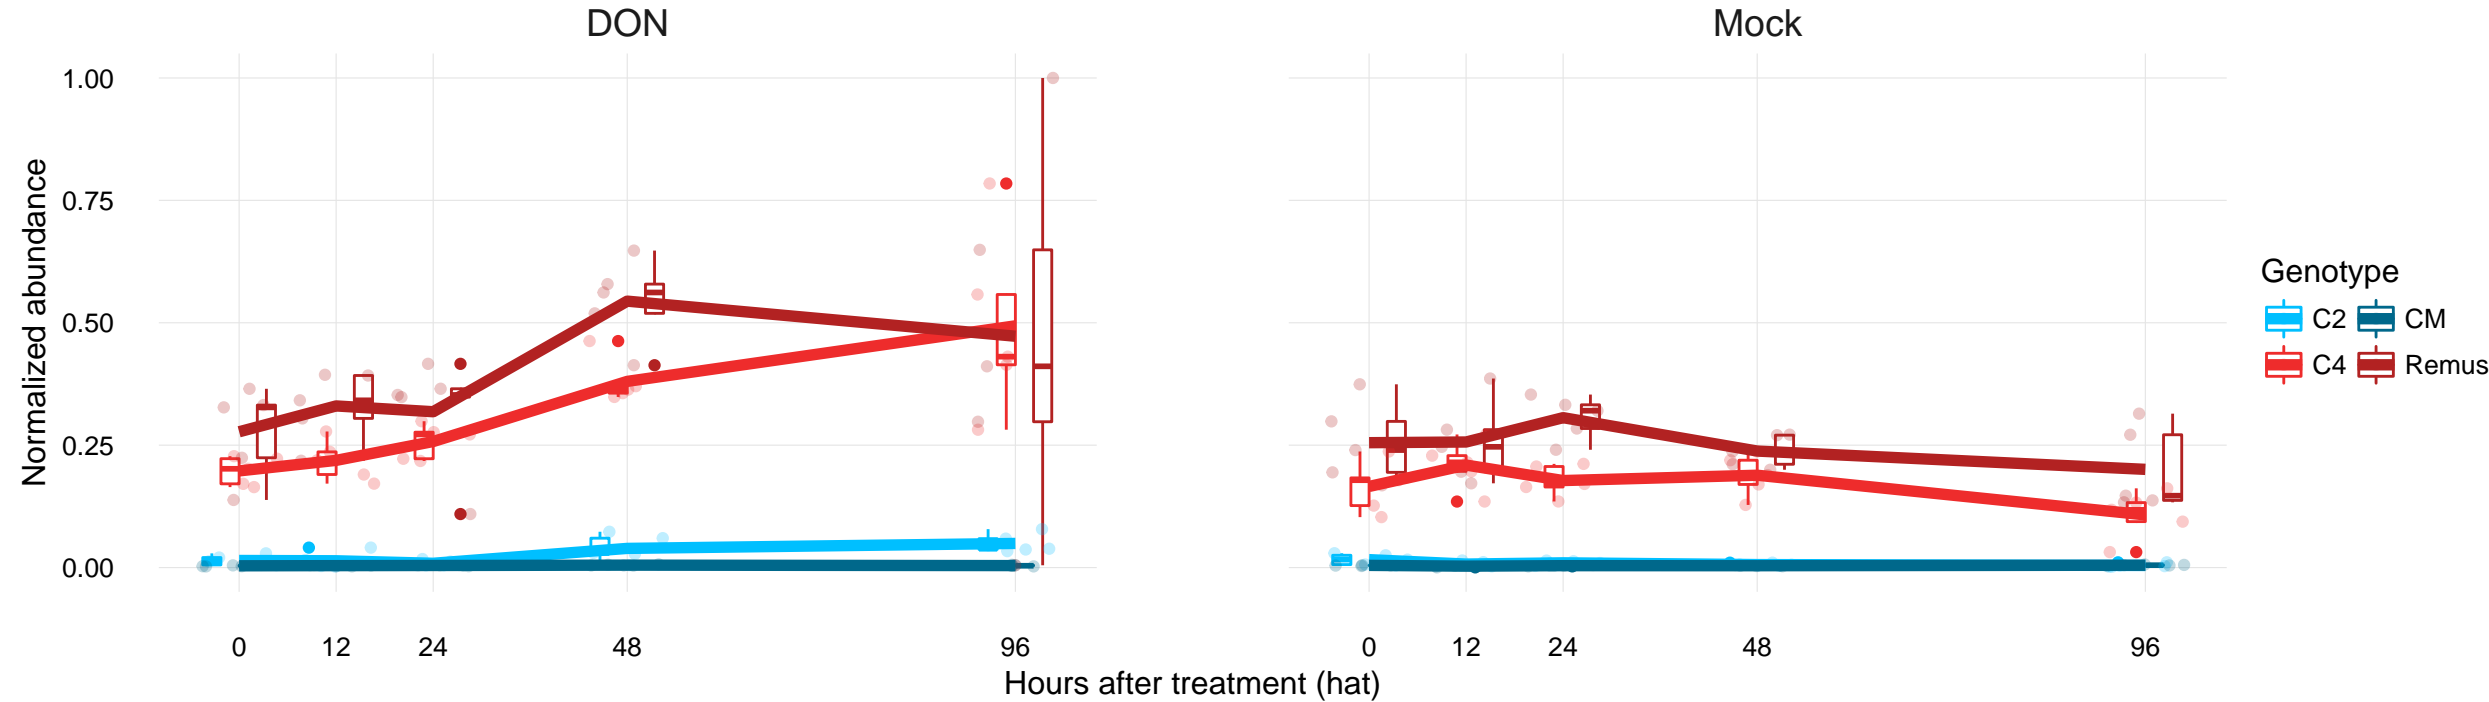

# A.43

Annotated as Lignan  
(1 database hit)

|                |                                                |
|----------------|------------------------------------------------|
| MZ             | 556.2392                                       |
| RT             | 11.19 min                                      |
| Normalization  | Indirectly via surrogate<br>in the KPX samples |
| Cluster        | —                                              |
| Cn total / Phe | 26 / 18                                        |

## C2, C4; different treatments

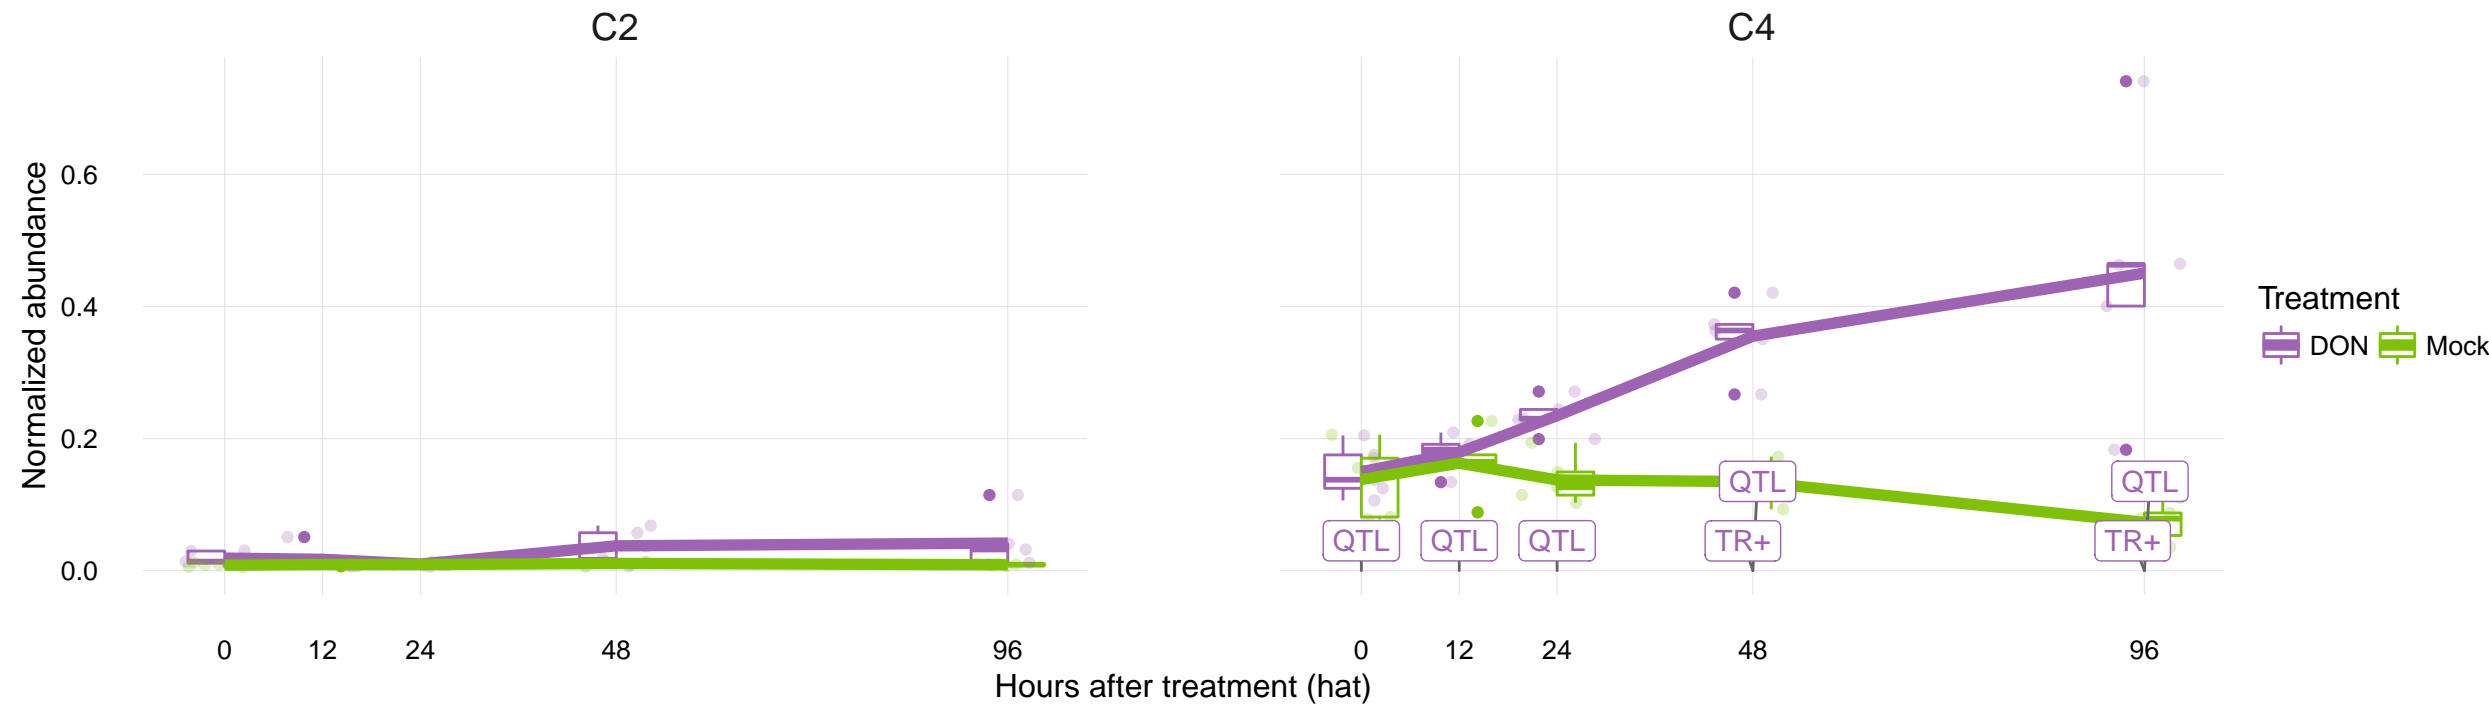

## DON, Mock; different genotypes

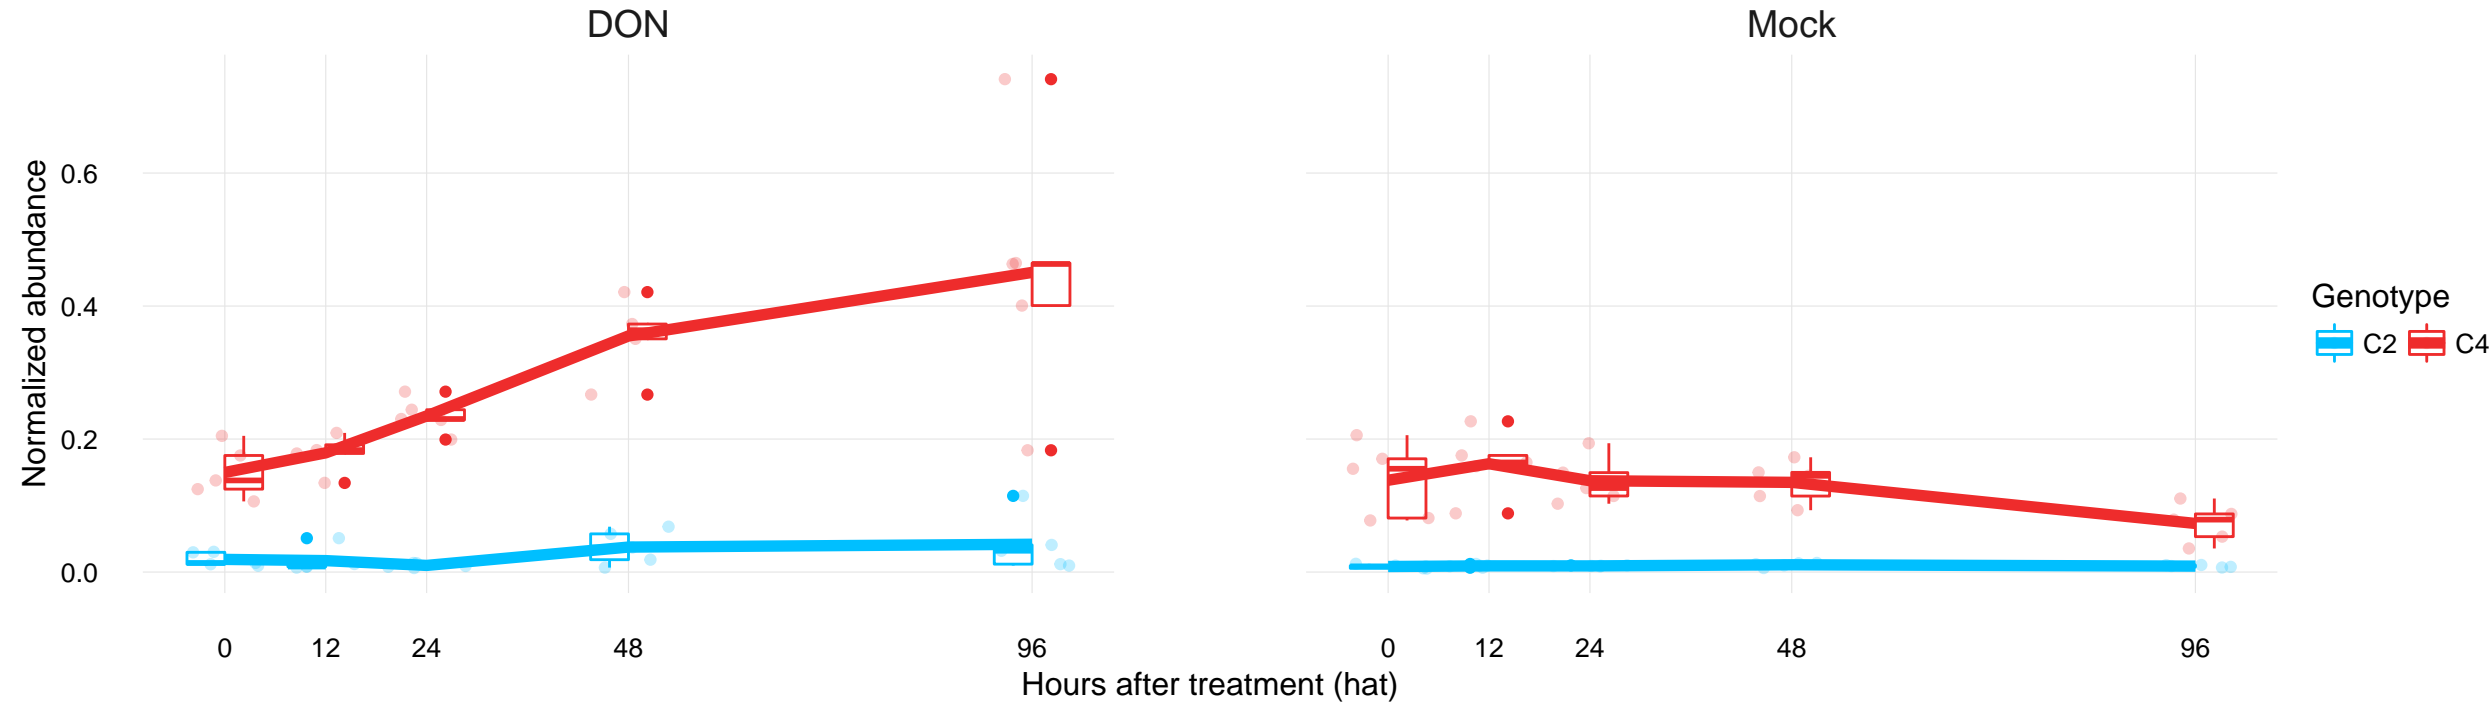

## CM, Remus; different treatments

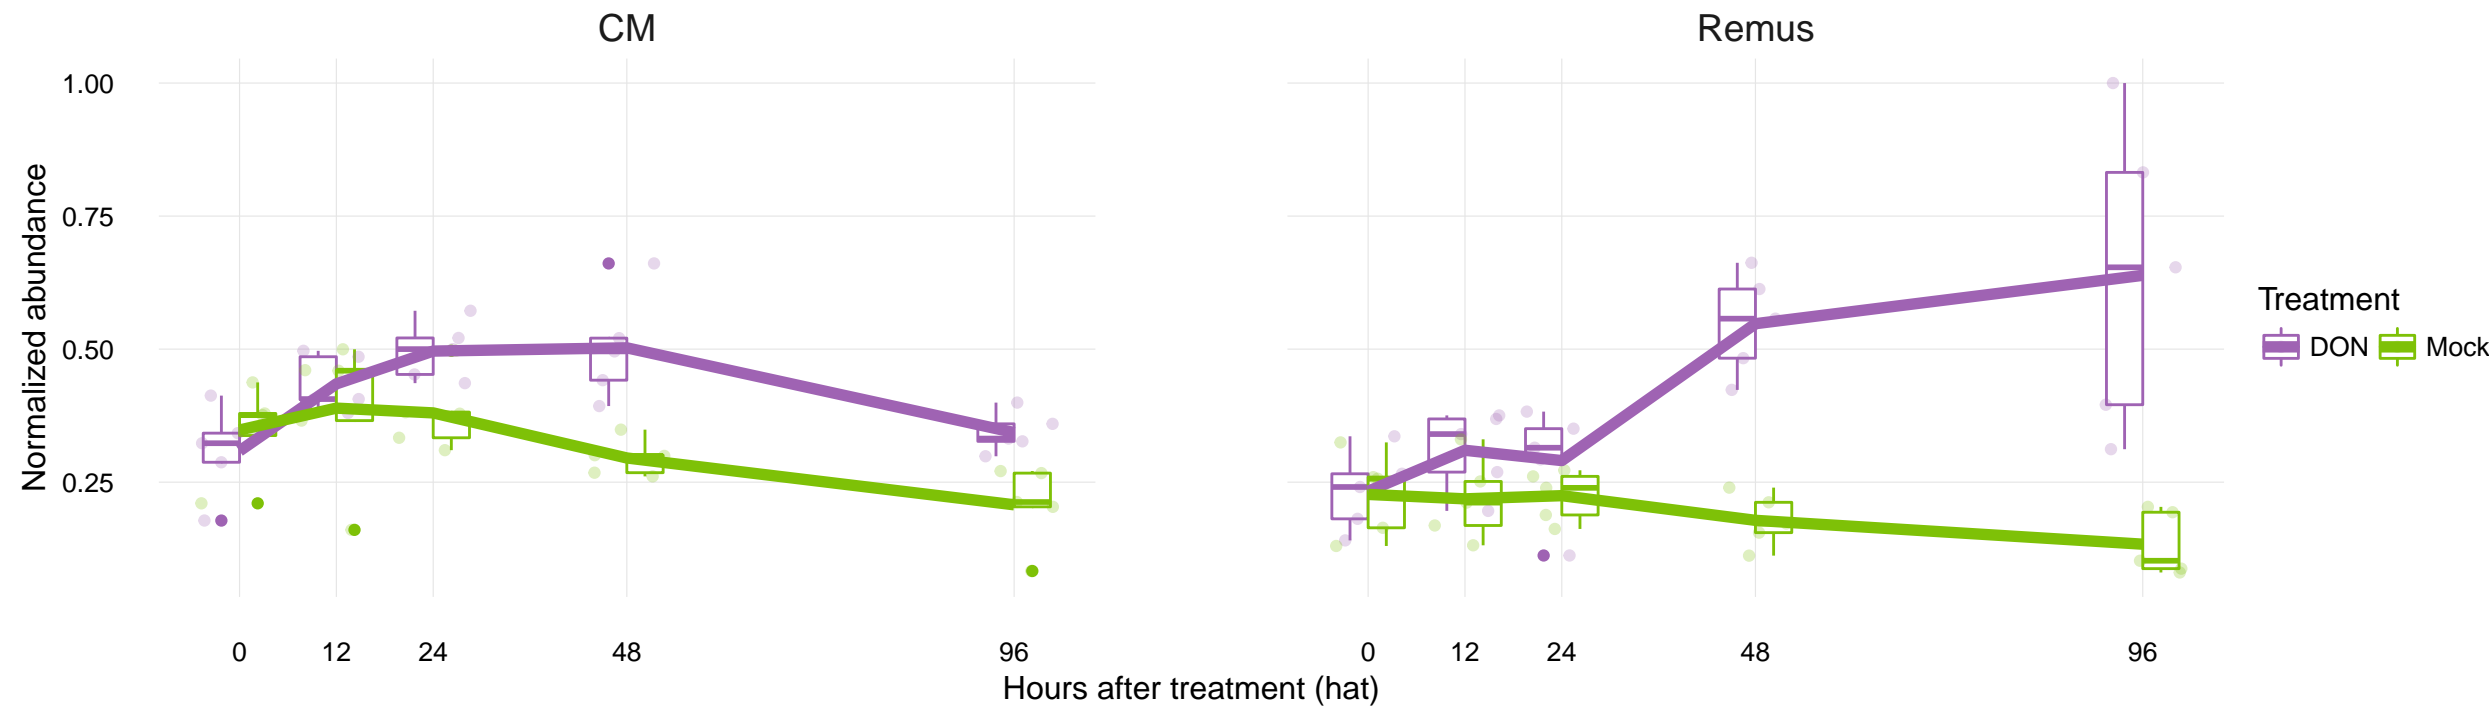

## DON, Mock; all four genotypes

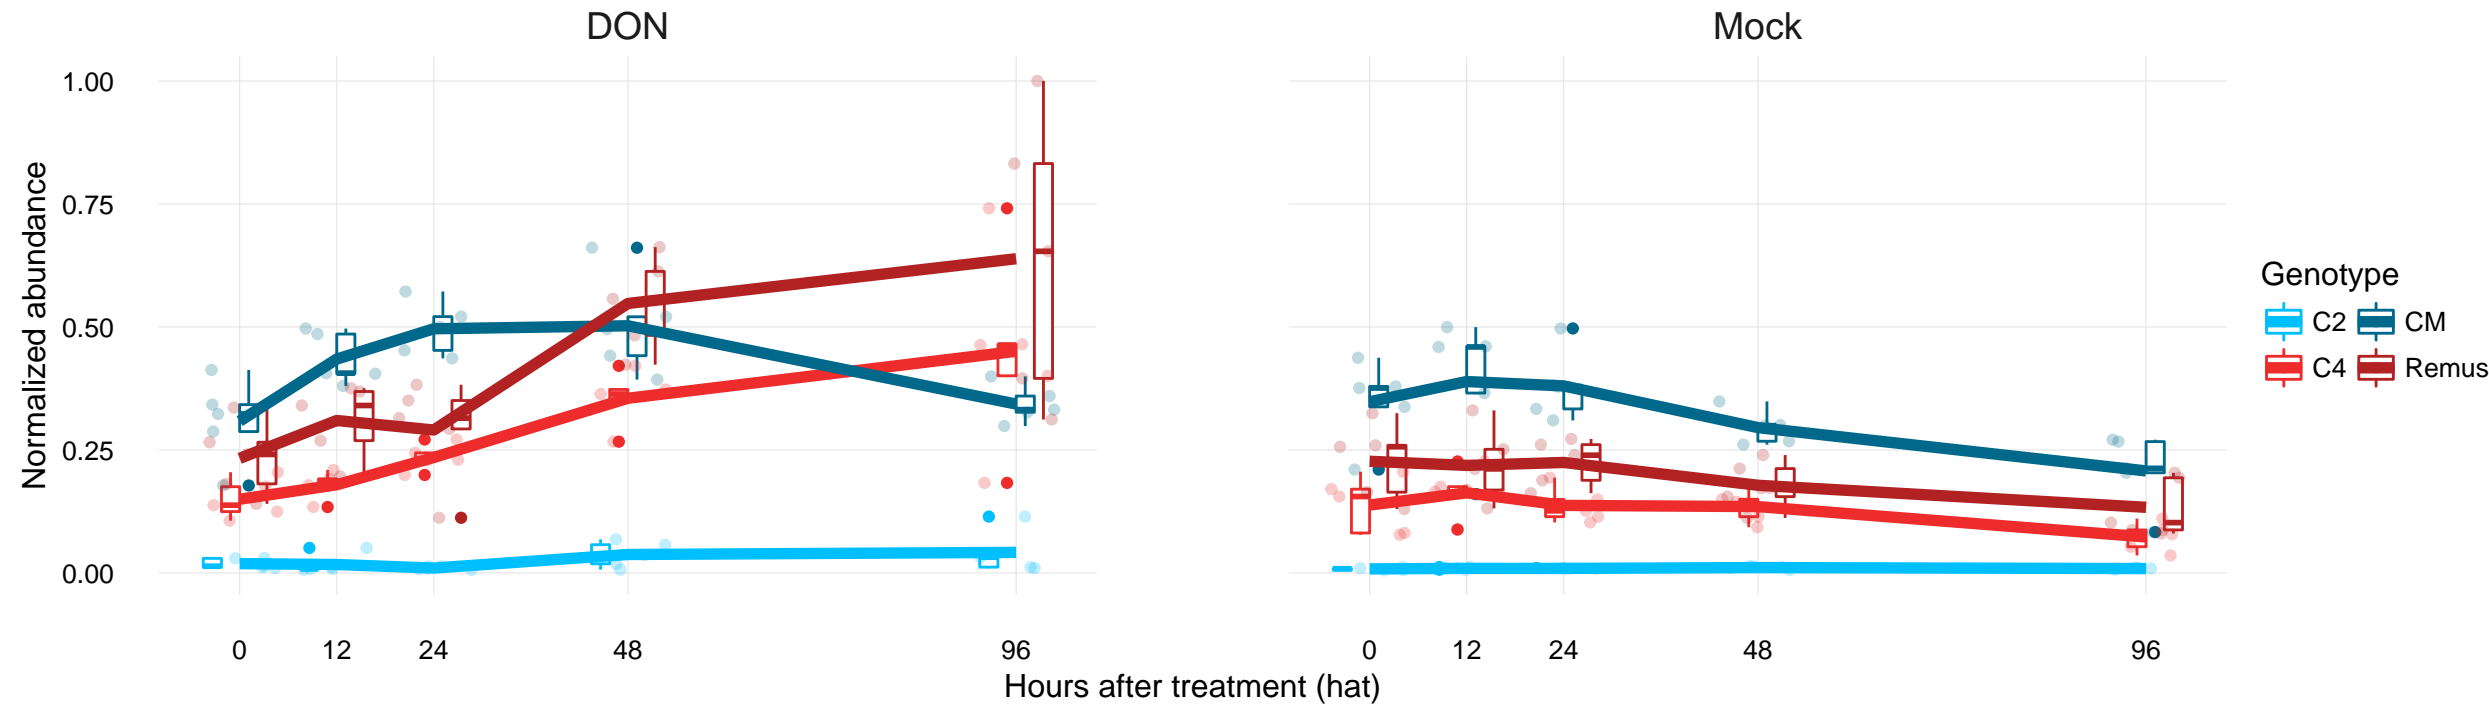

# U.6

Unknown Phe-derived wheat-metabolite

|                |                          |
|----------------|--------------------------|
| MZ             | 395.0955                 |
| RT             | 12.79 min                |
| Normalization  | Directly via KPX samples |
| Cluster        | –                        |
| Cn total / Phe | 7 / 7                    |

C2, C4; different treatments

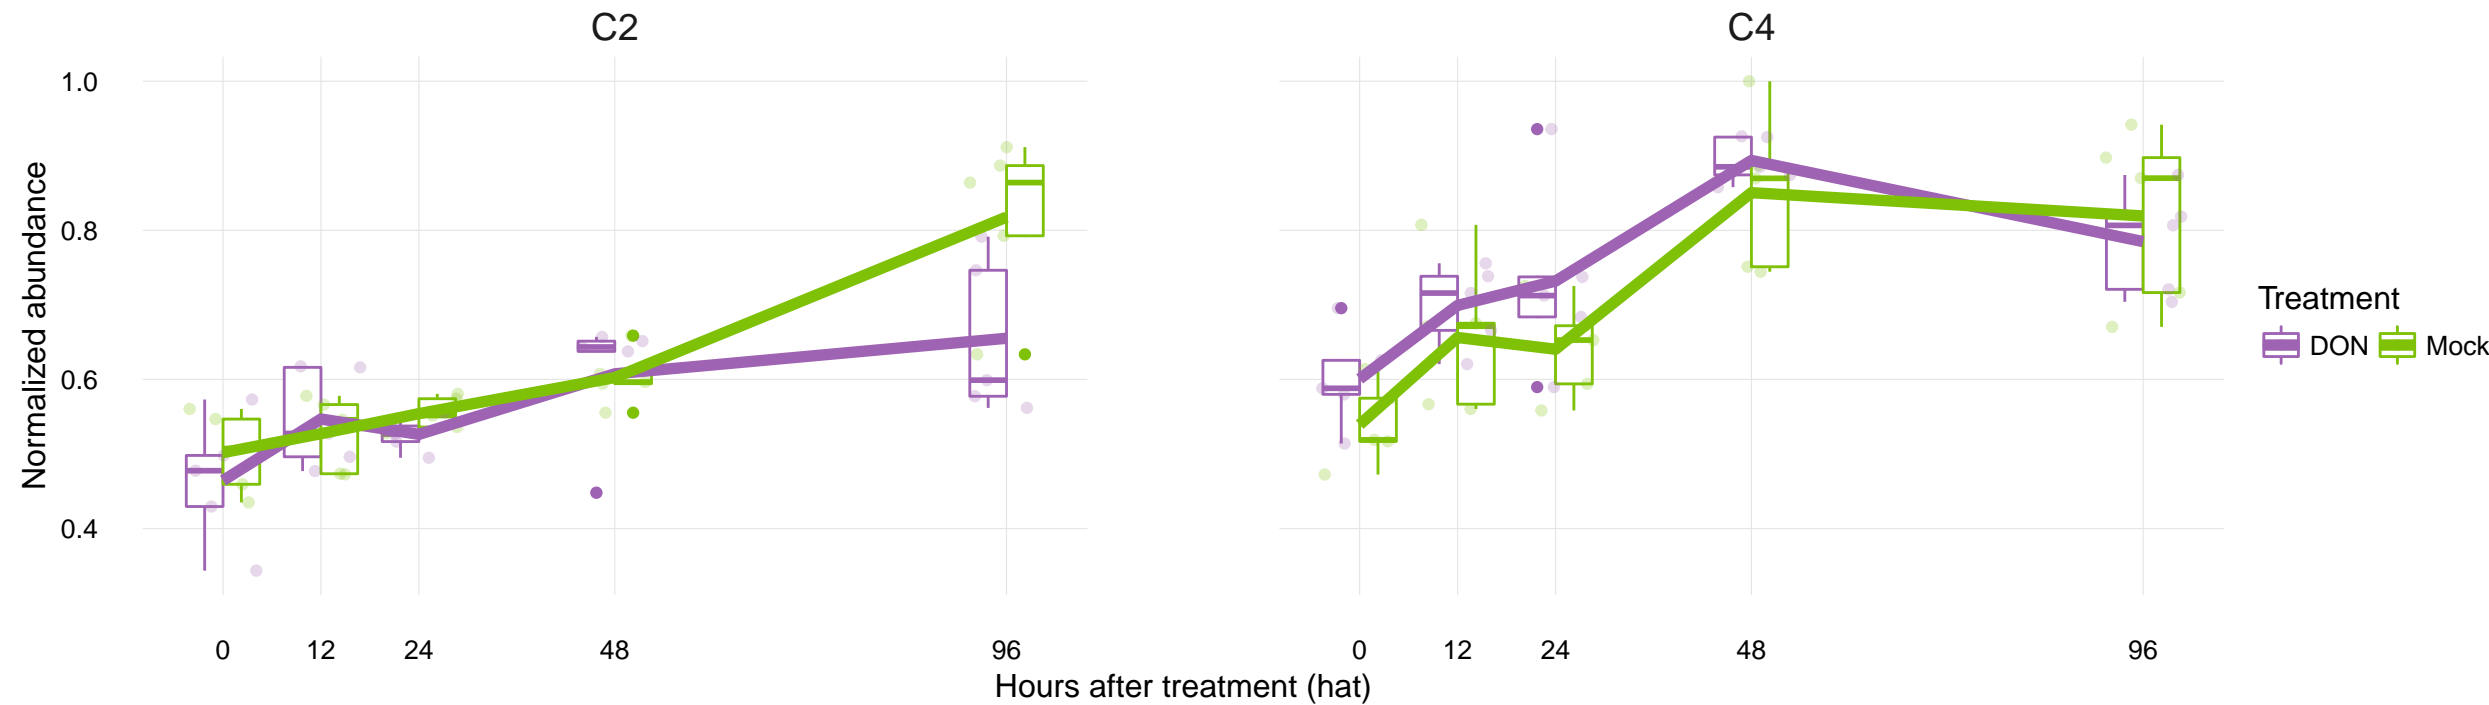

DON, Mock; different genotypes

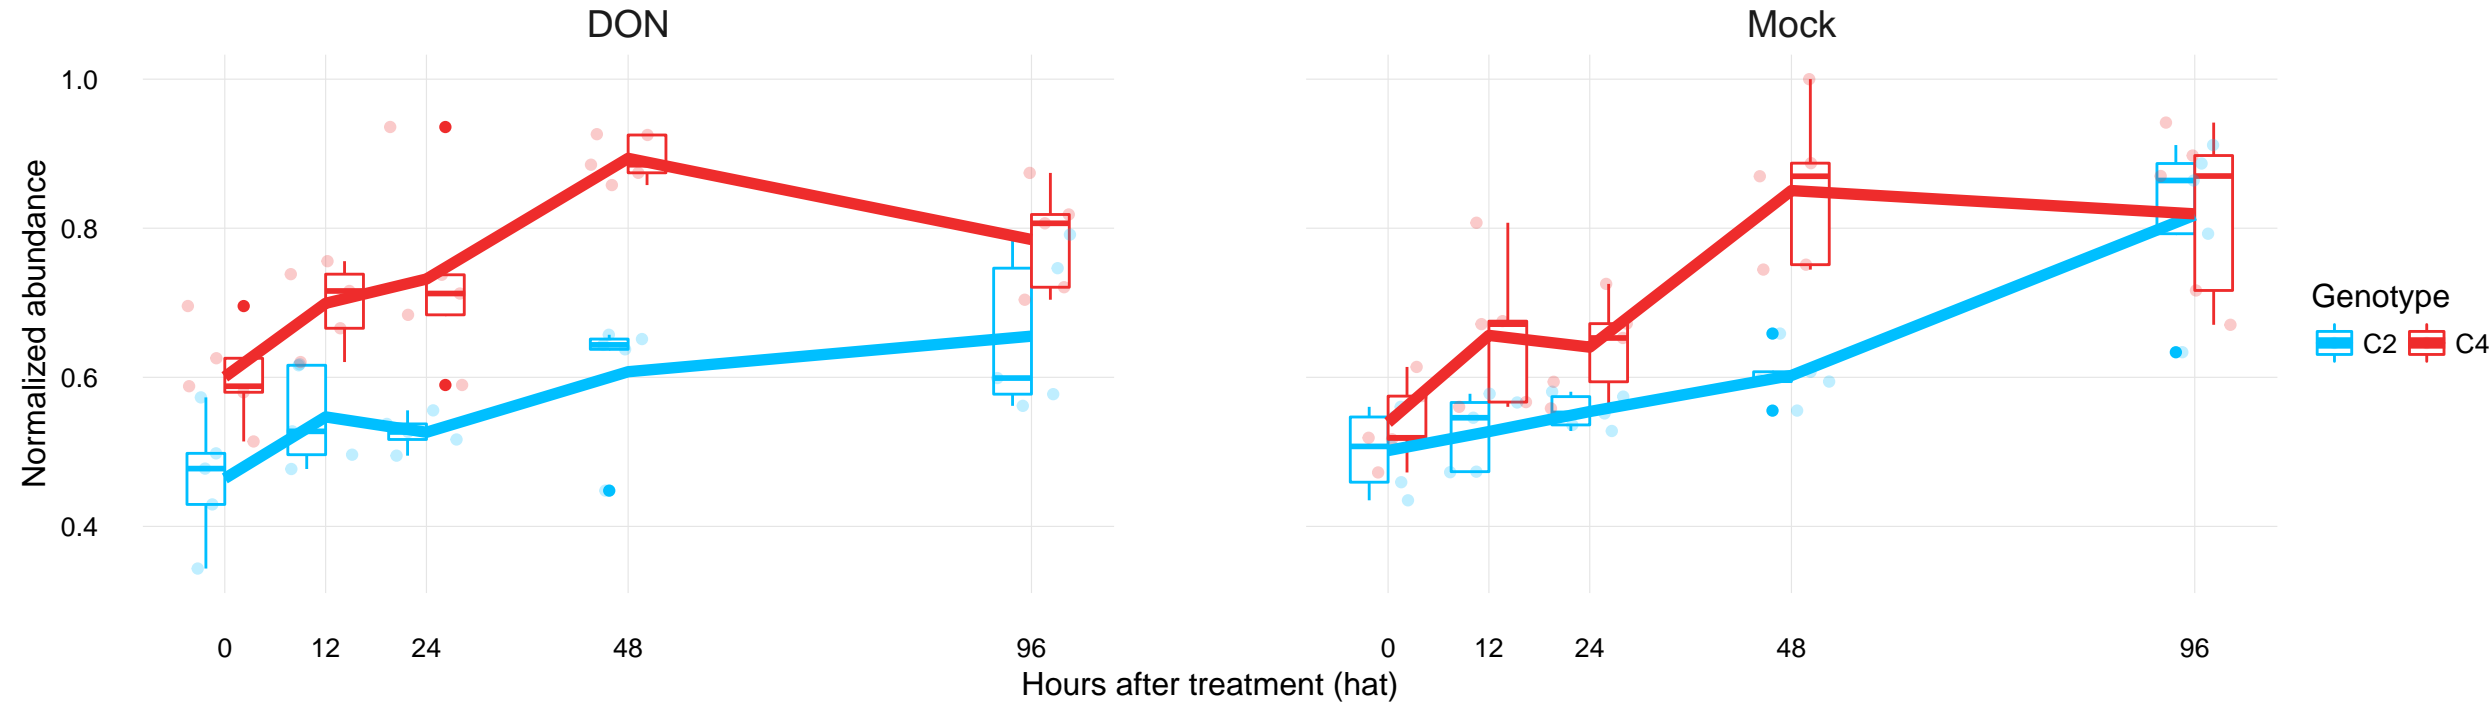

CM, Remus; different treatments

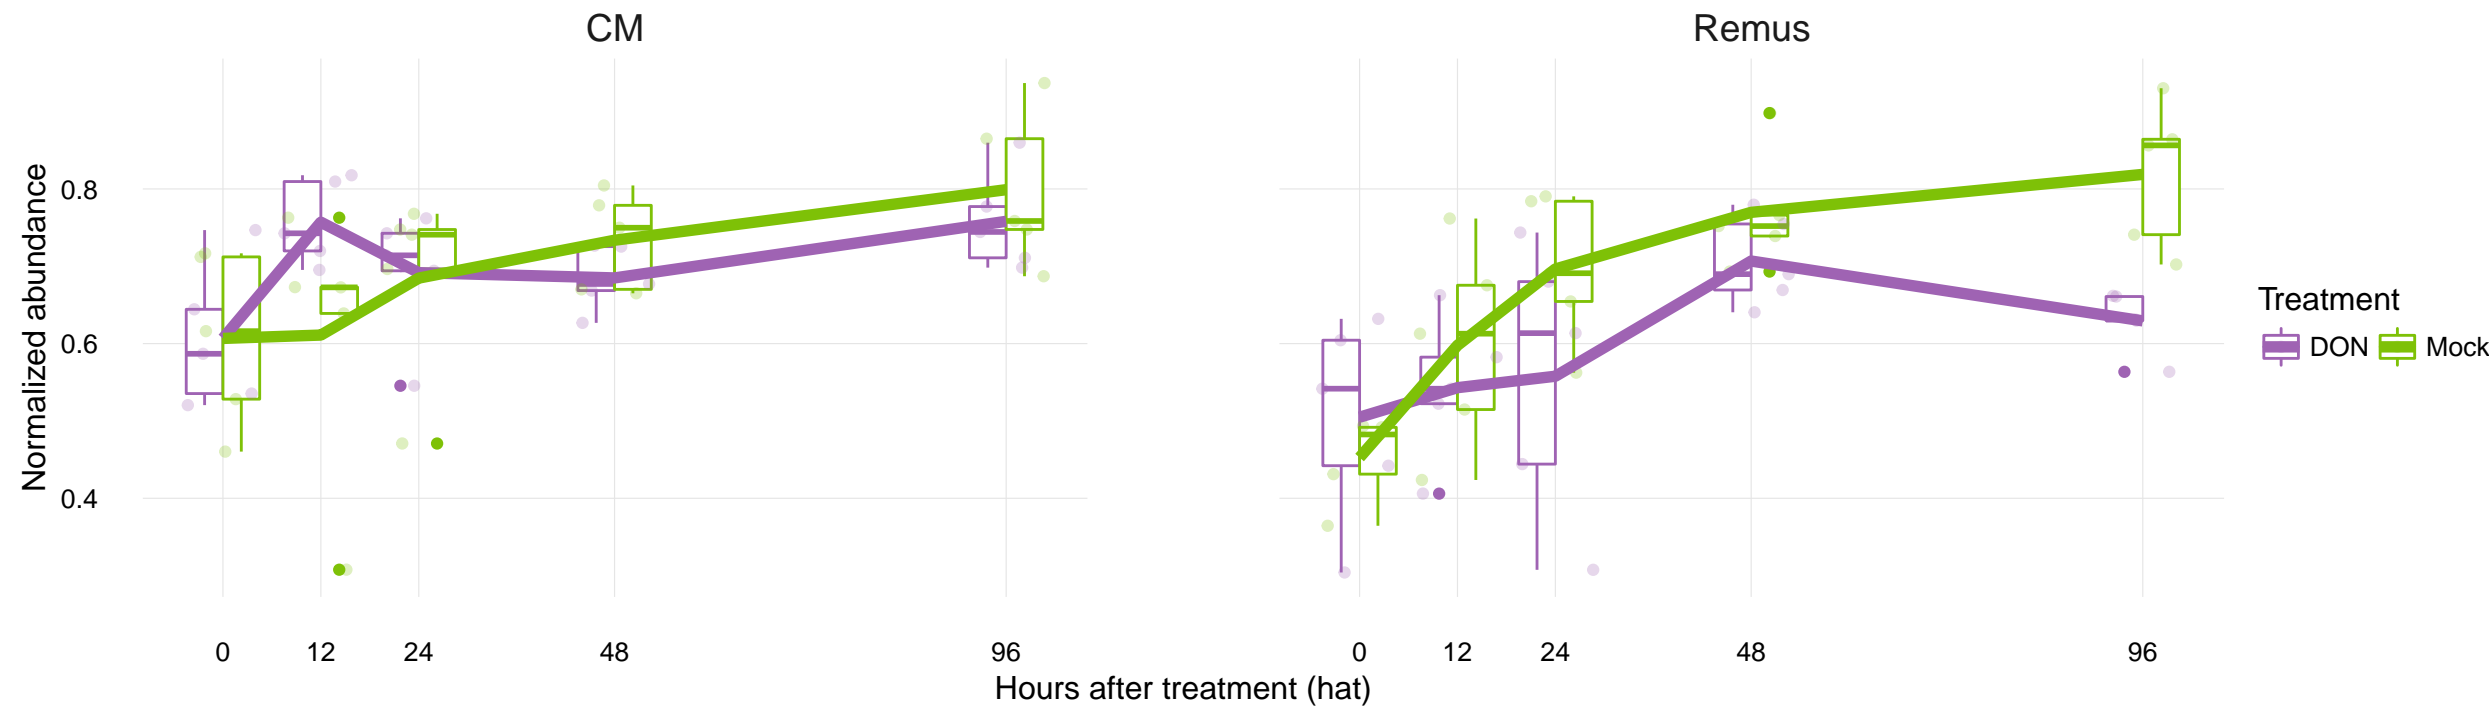

DON, Mock; all four genotypes

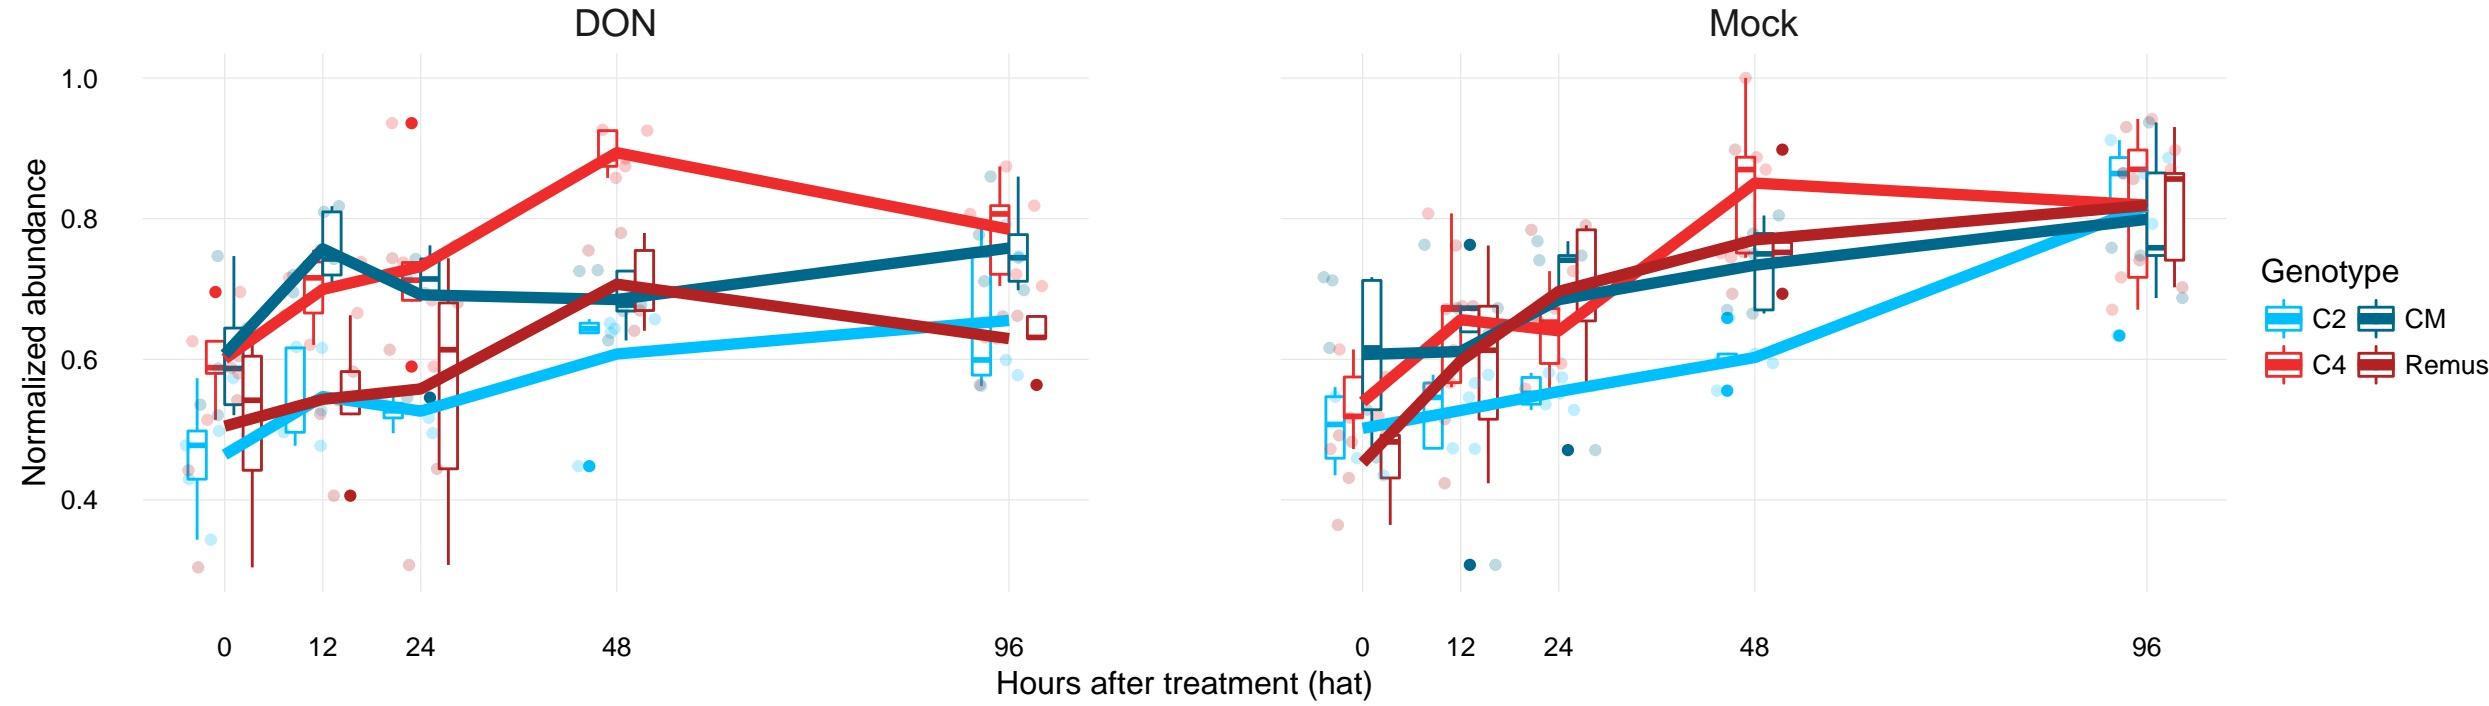

# A.58

Annotated as Putative benzoic acid derivative  
(1 database hit)

|                |                          |
|----------------|--------------------------|
| MZ             | 197.0809                 |
| RT             | 12.78 min                |
| Normalization  | Directly via KPX samples |
| Cluster        | –                        |
| Cn total / Phe | 10 / 7                   |

## C2, C4; different treatments

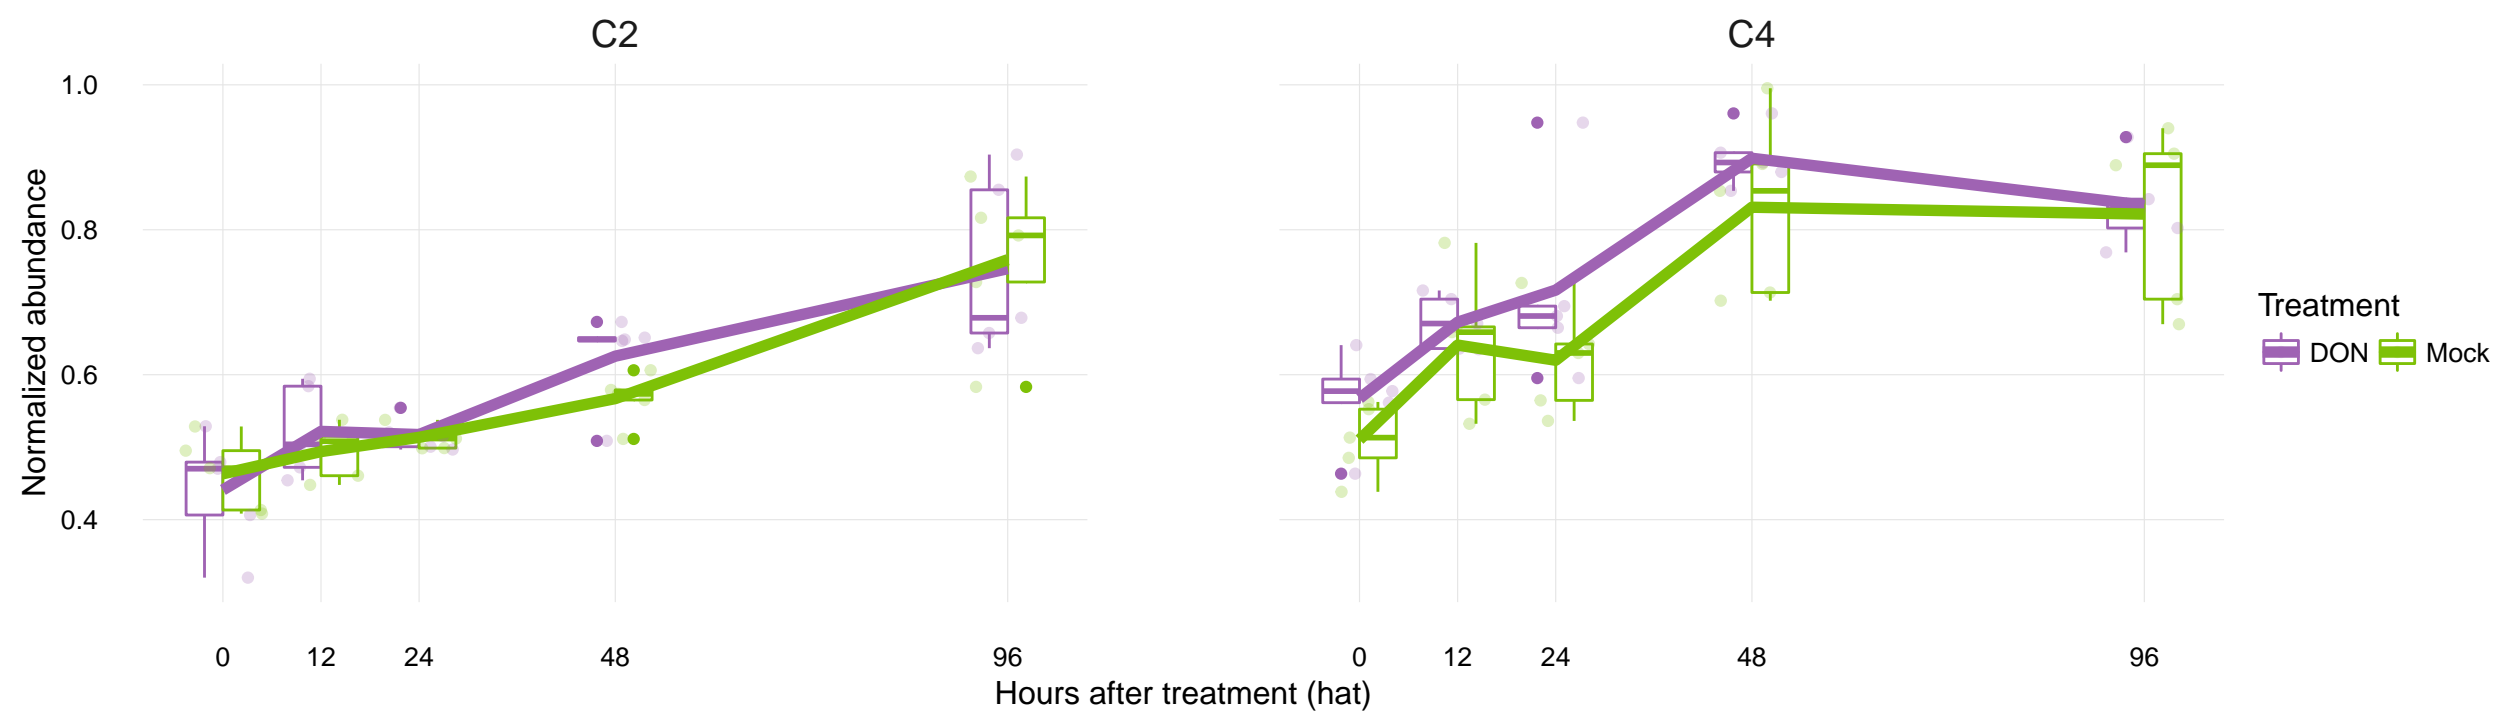

## DON, Mock; different genotypes

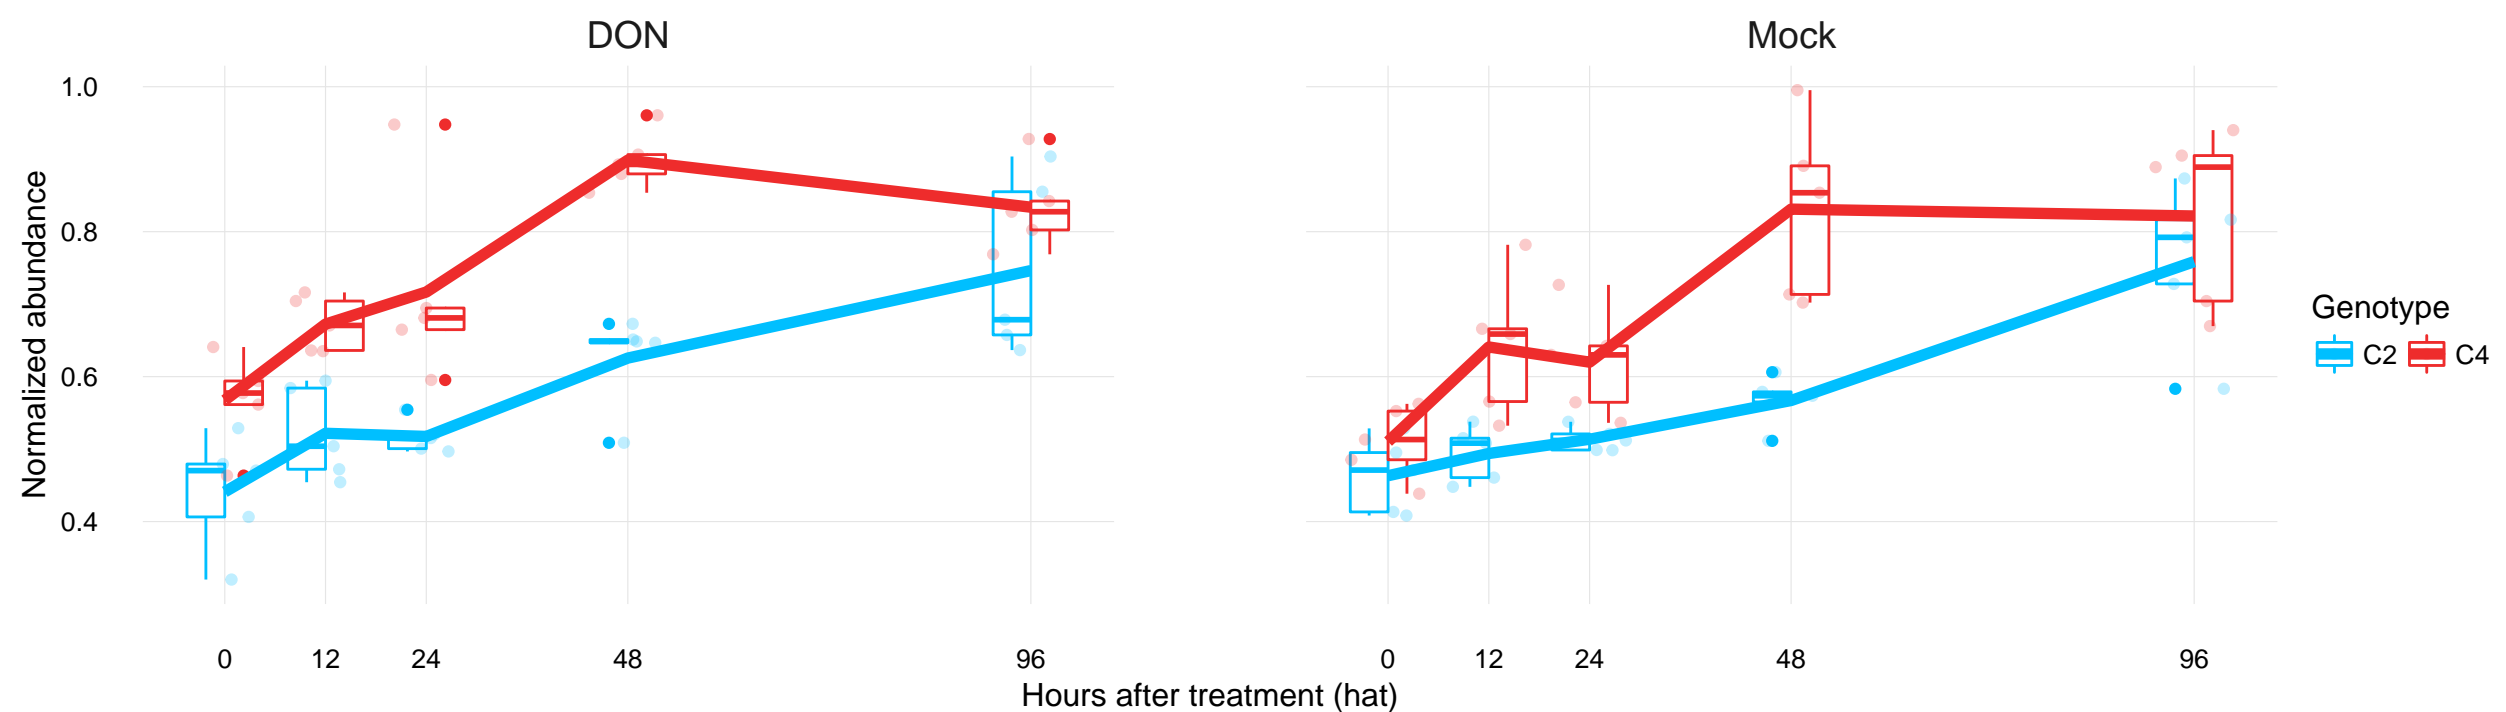

## CM, Remus; different treatments

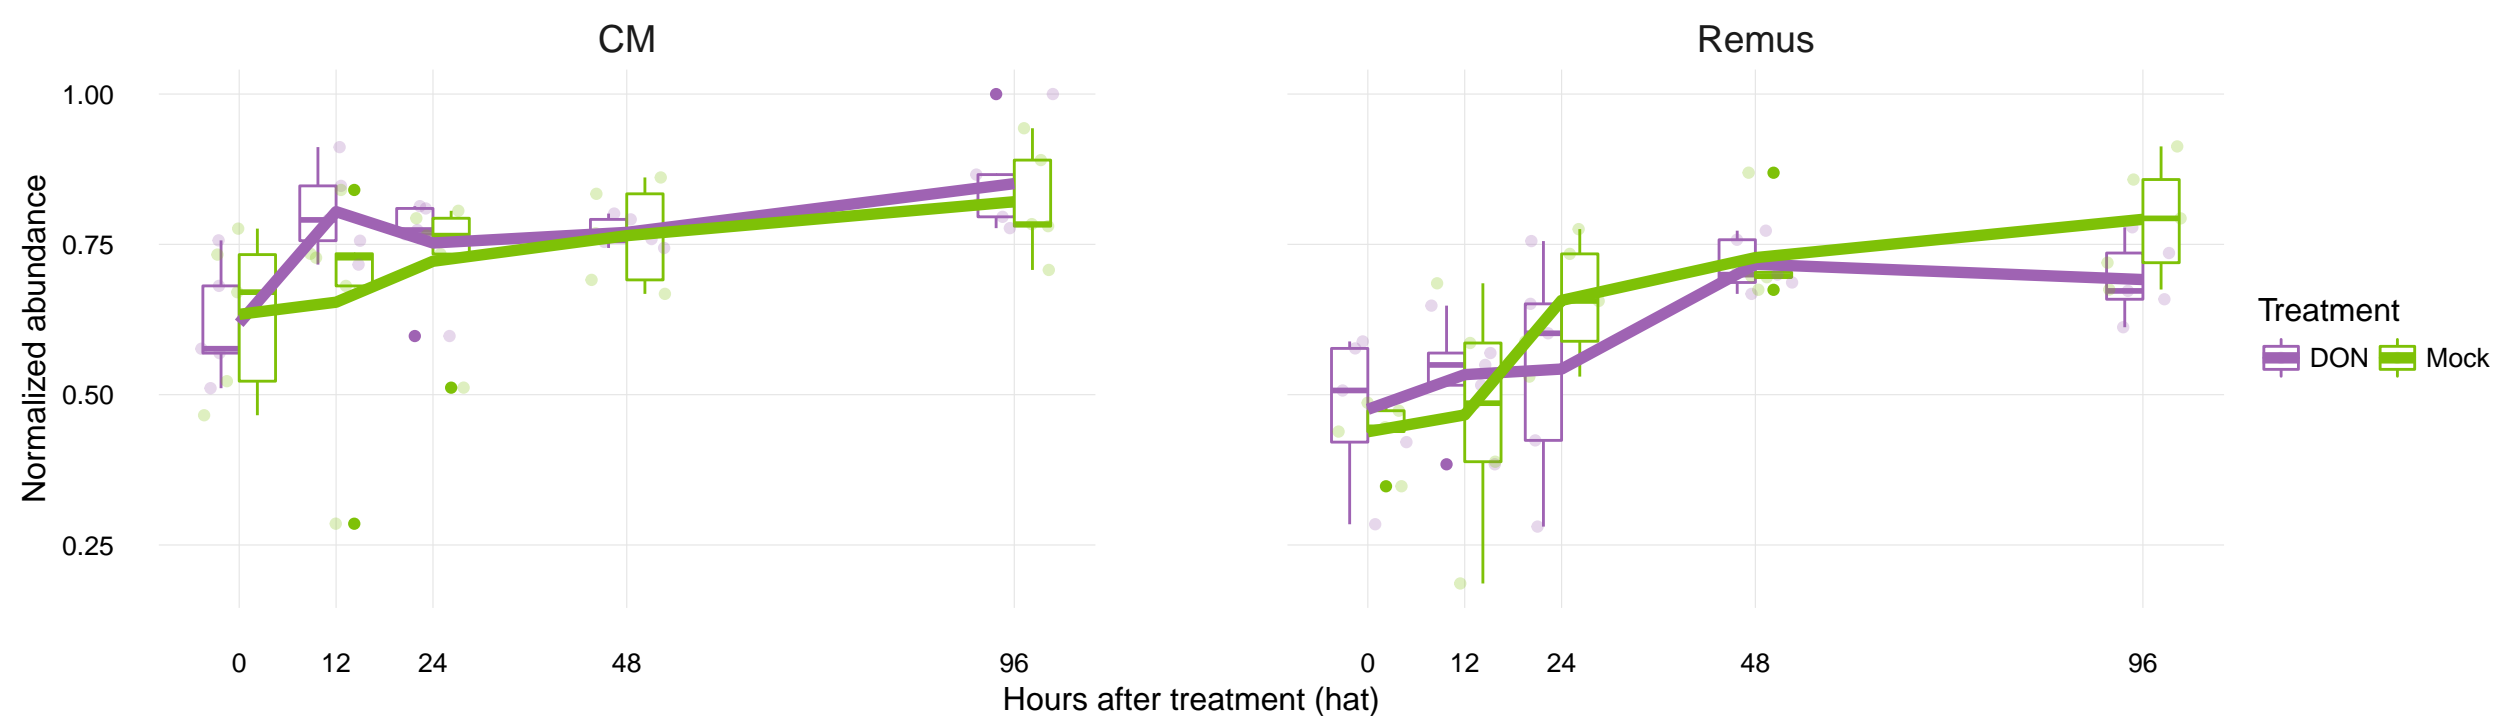

## DON, Mock; all four genotypes

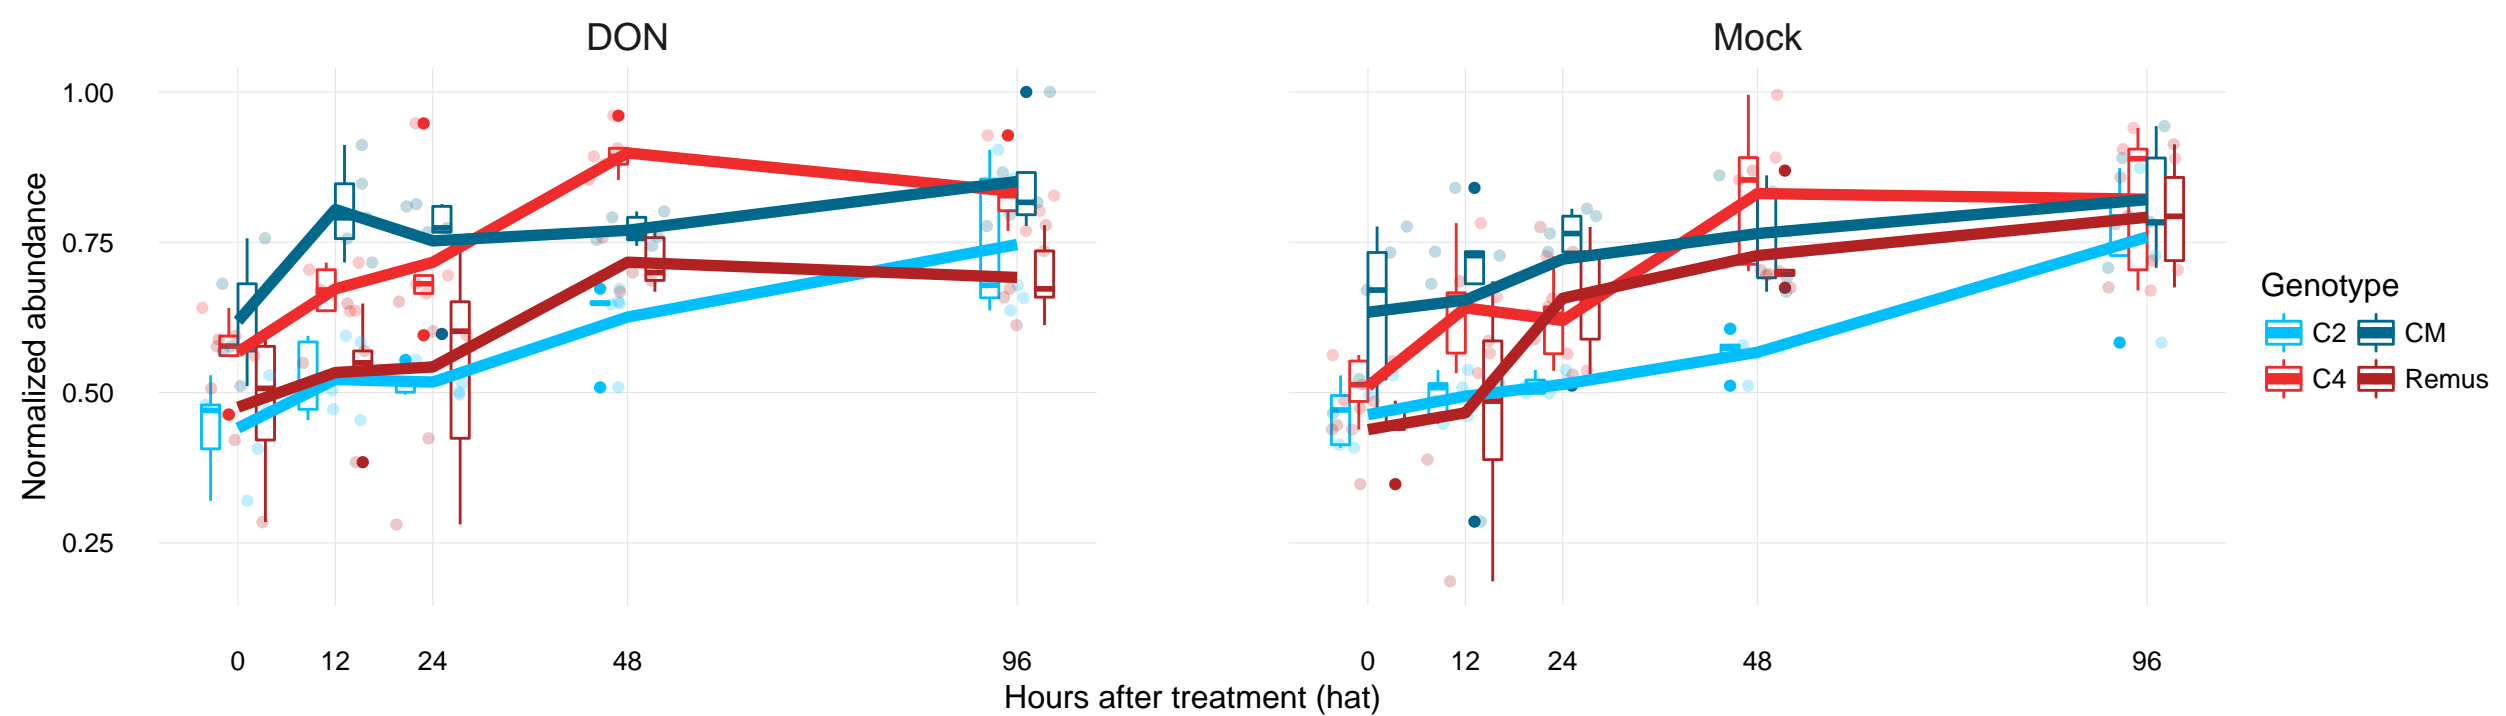

# A.94

Annotated as Putative phenylacetic acid derivative  
(2 database hits)

|                |                          |
|----------------|--------------------------|
| MZ             | 393.1158                 |
| RT             | 16.24 min                |
| Normalization  | Directly via KPX samples |
| Cluster        | –                        |
| Cn total / Phe | 17 / 8                   |

## C2, C4; different treatments

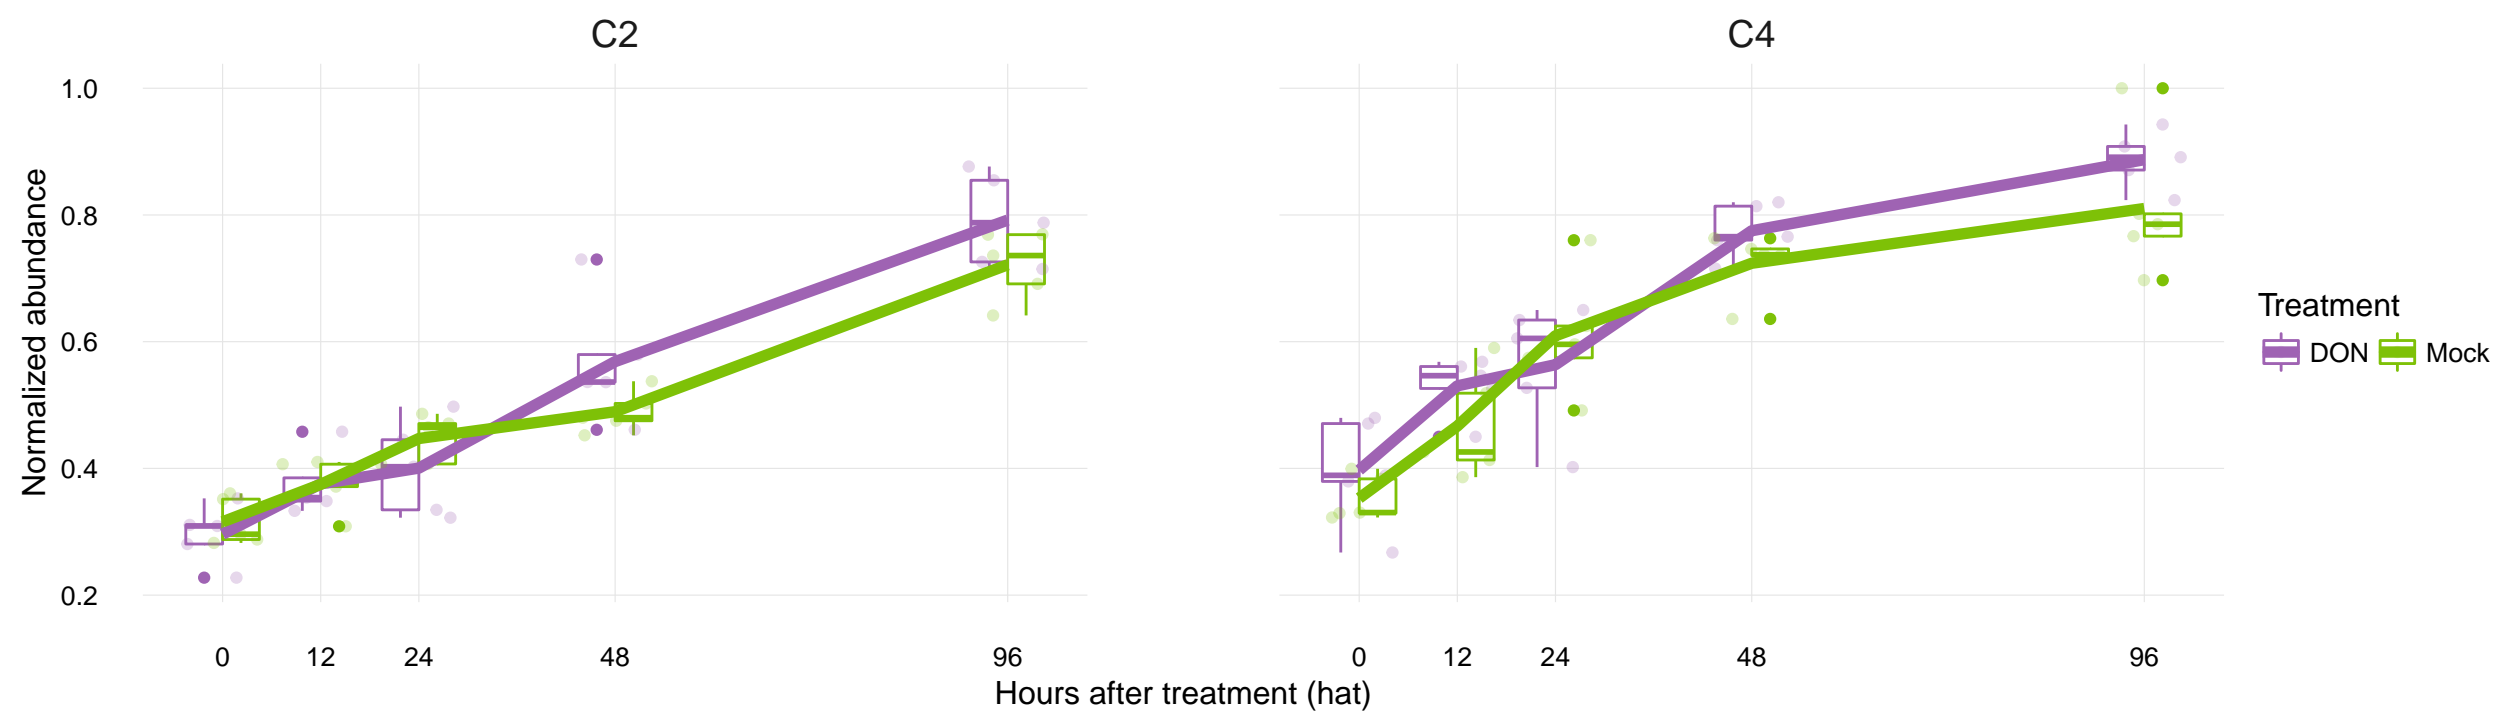

## DON, Mock; different genotypes

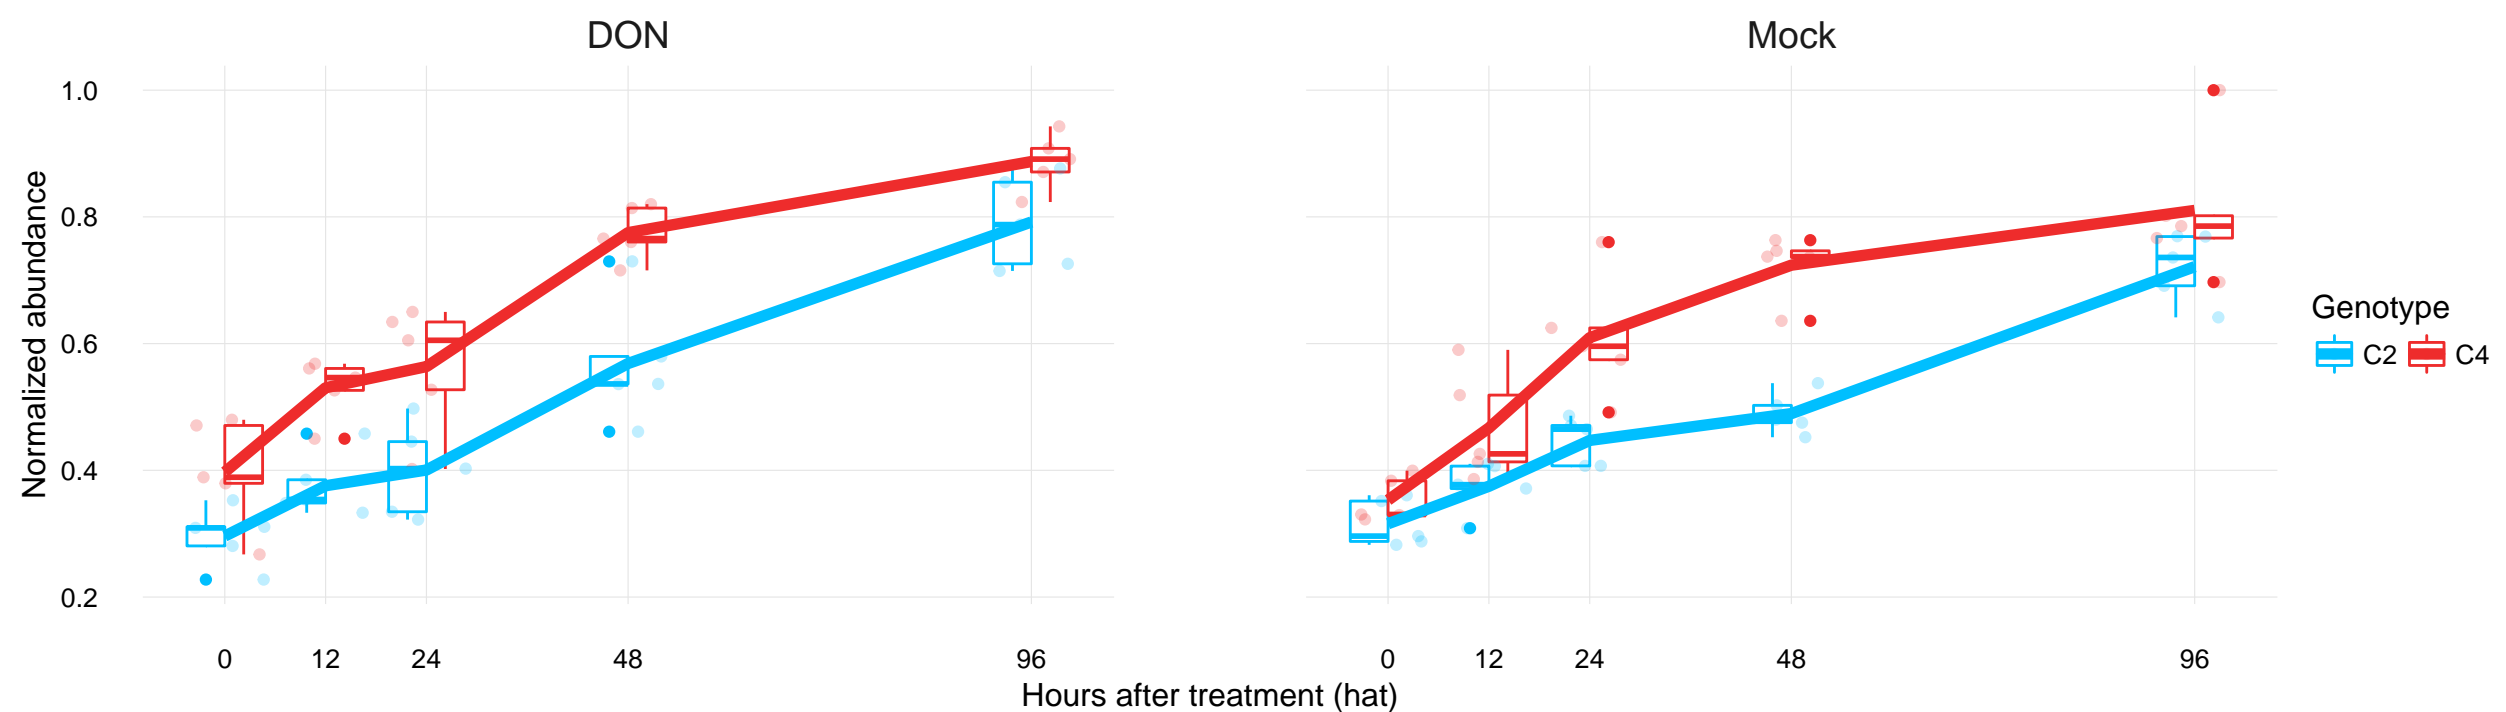

## CM, Remus; different treatments

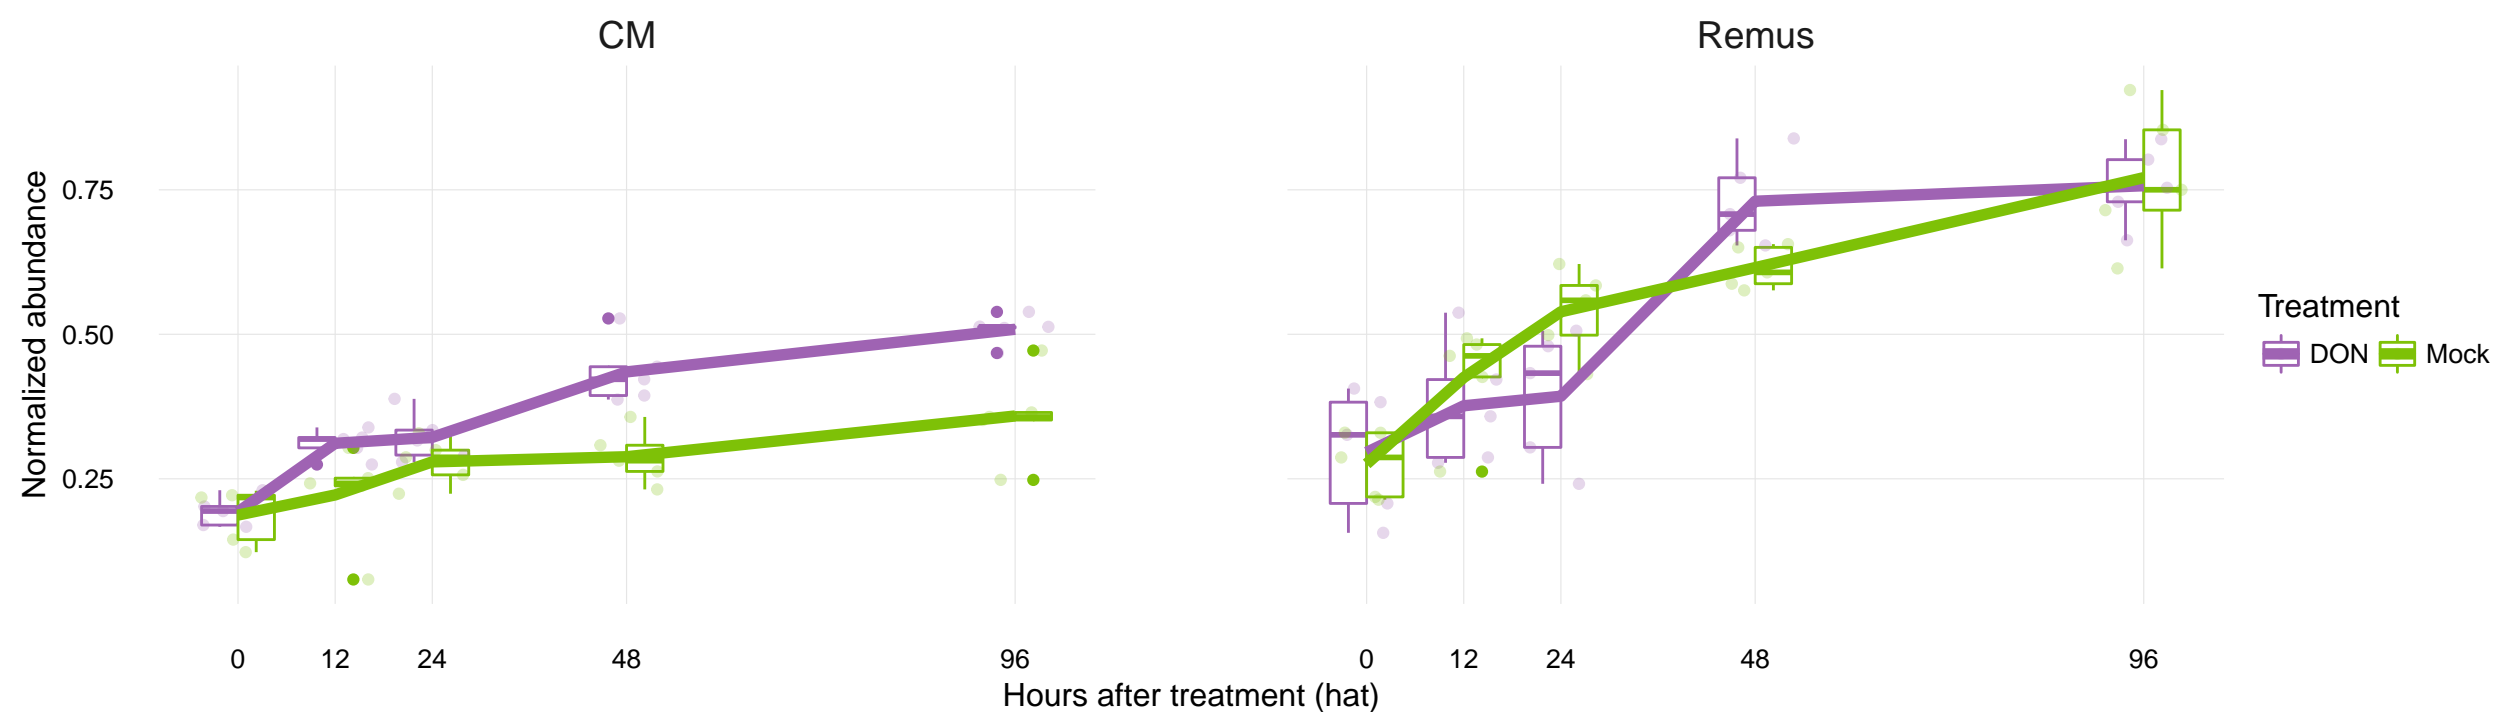

## DON, Mock; all four genotypes

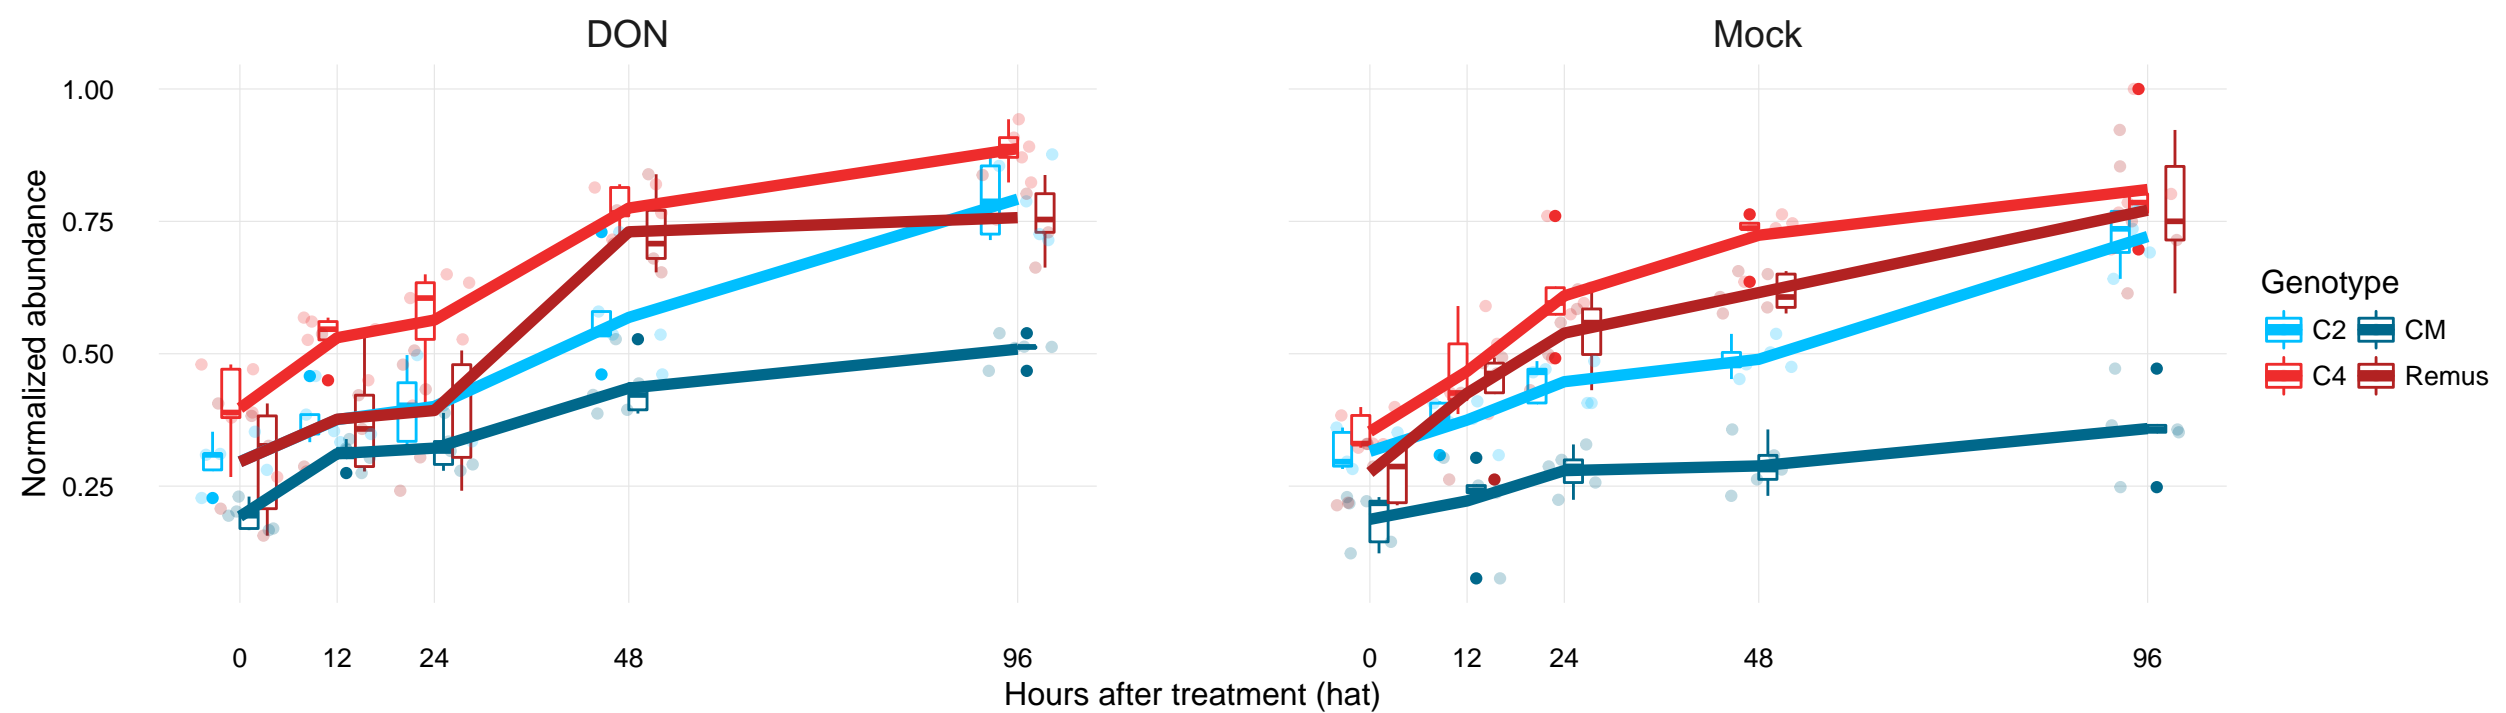

# A.96

Annotated as Putative phenylacetic acid derivative  
(1 database hit)

|                |                                                |
|----------------|------------------------------------------------|
| MZ             | 335.1128                                       |
| RT             | 16.27 min                                      |
| Normalization  | Indirectly via surrogate<br>in the KPX samples |
| Cluster        | Cluster 2                                      |
| Cn total / Phe | 17 / 8                                         |

## C2, C4; different treatments

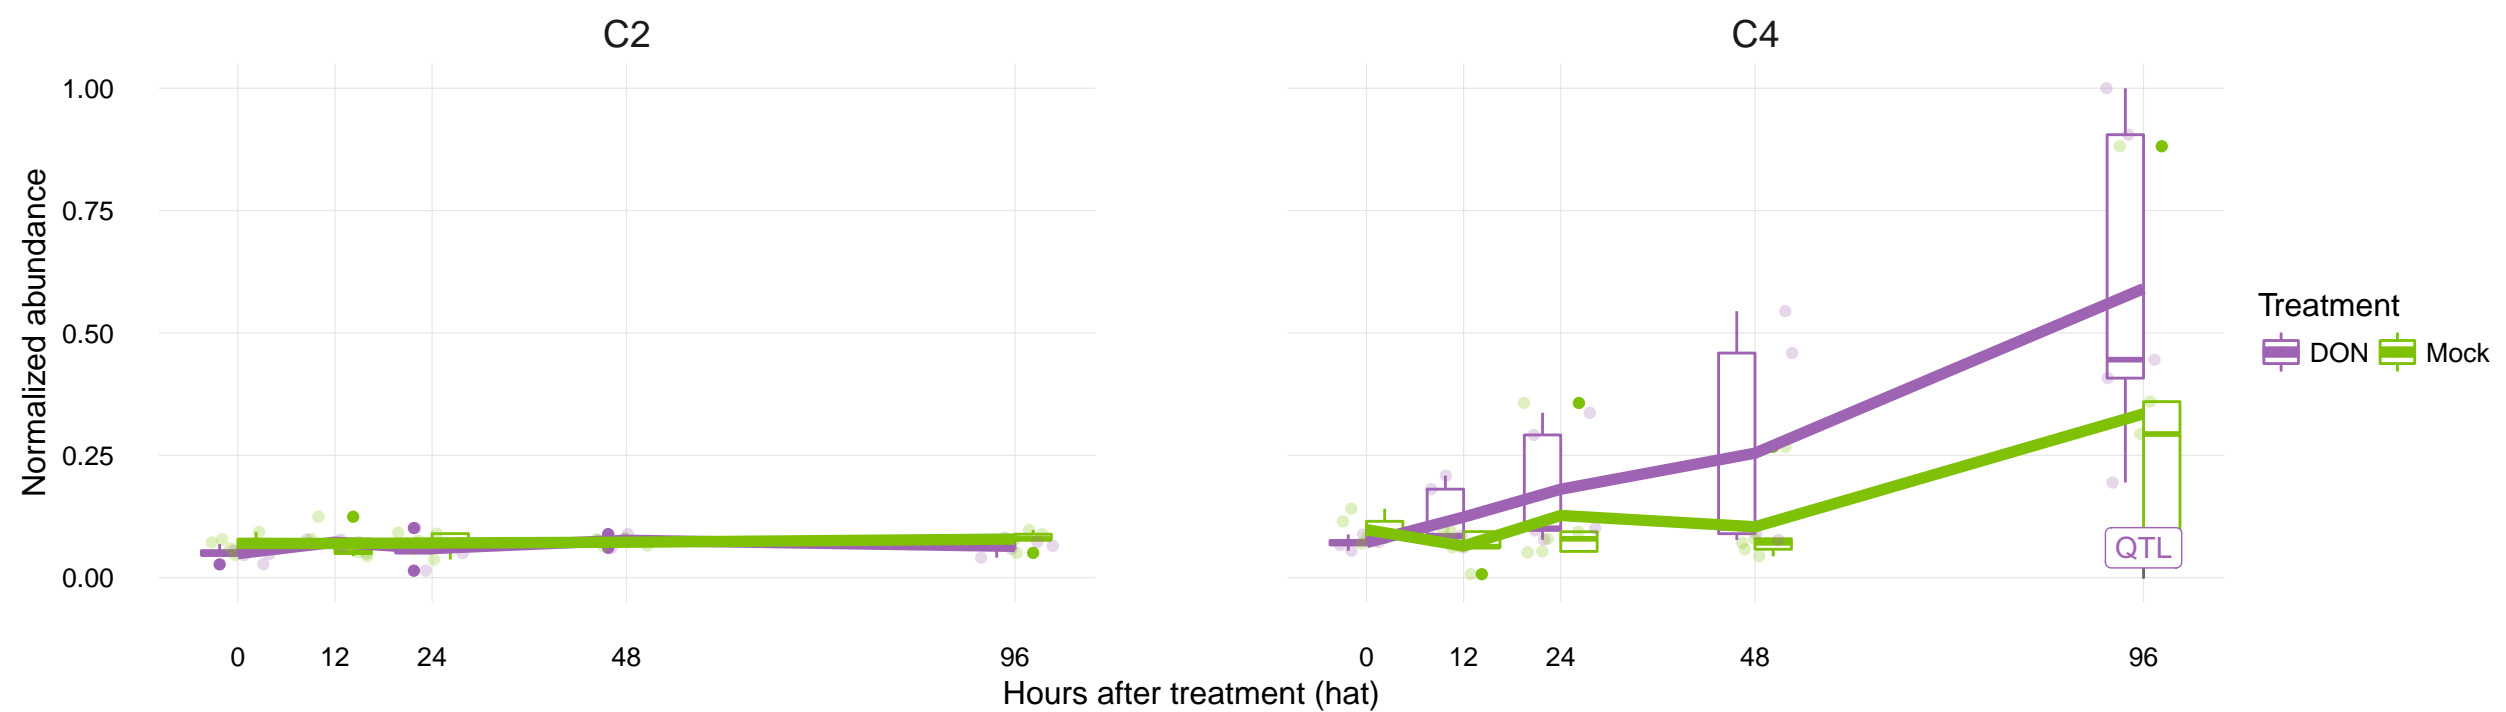

## DON, Mock; different genotypes

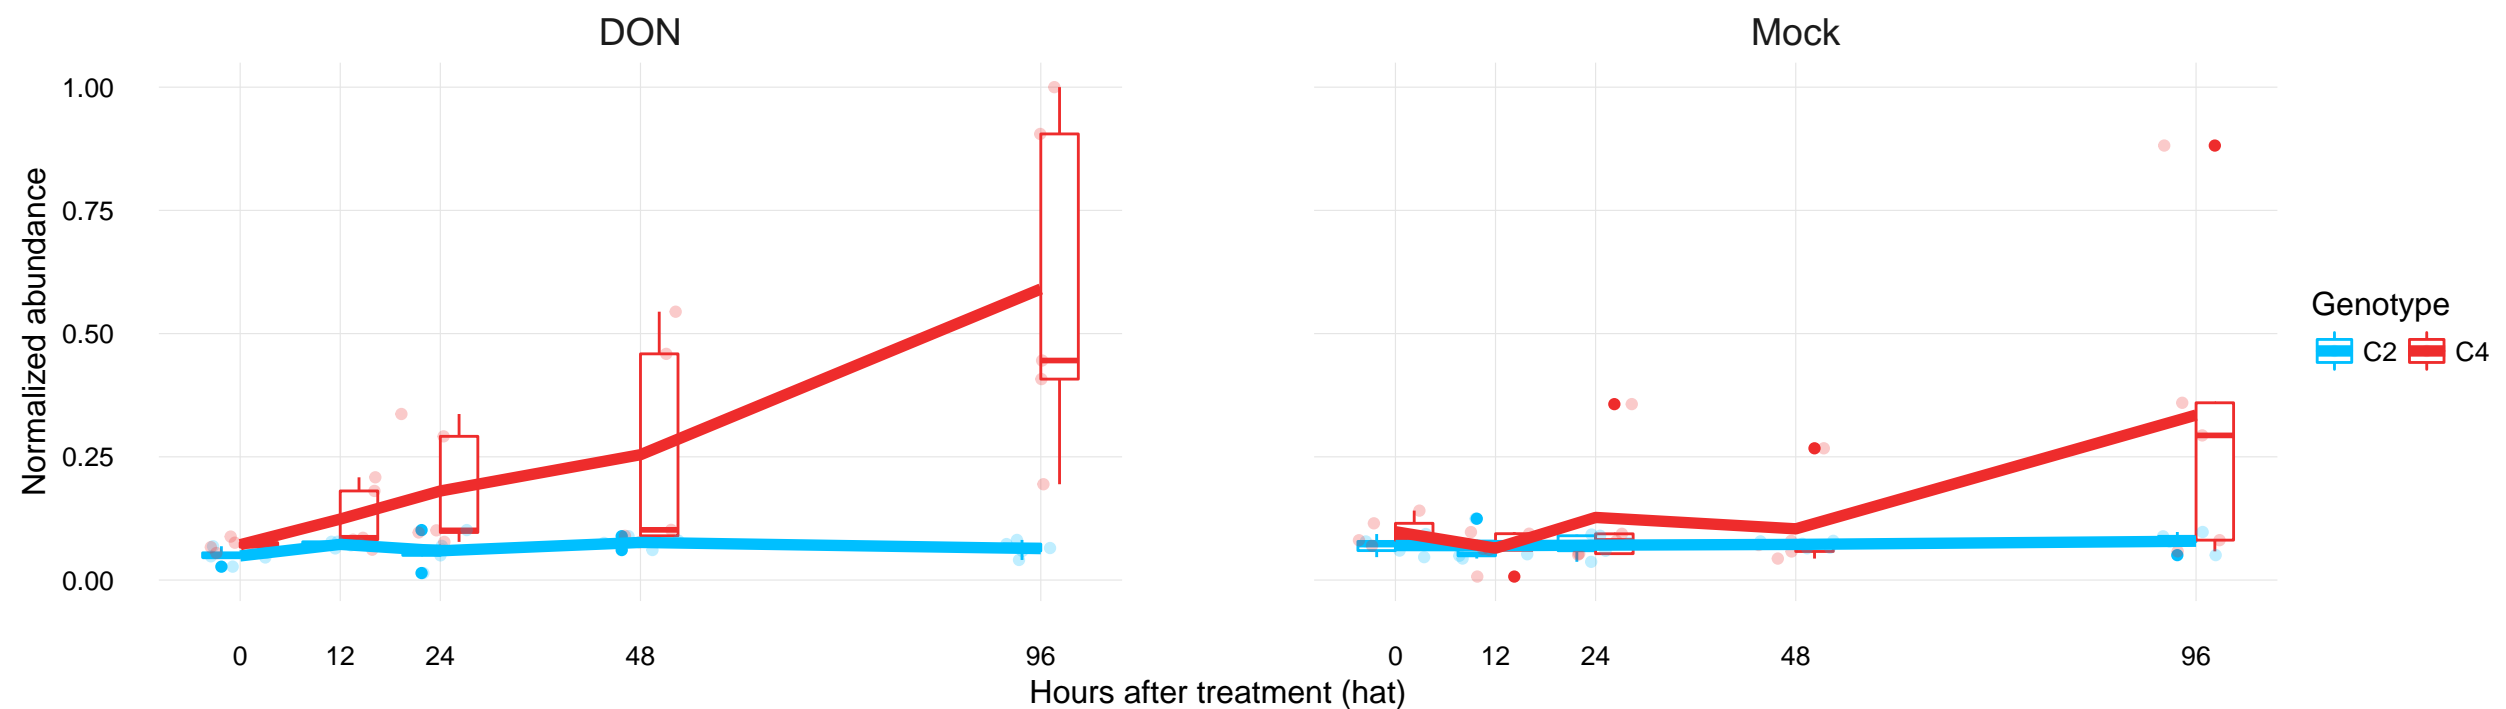

## CM, Remus; different treatments

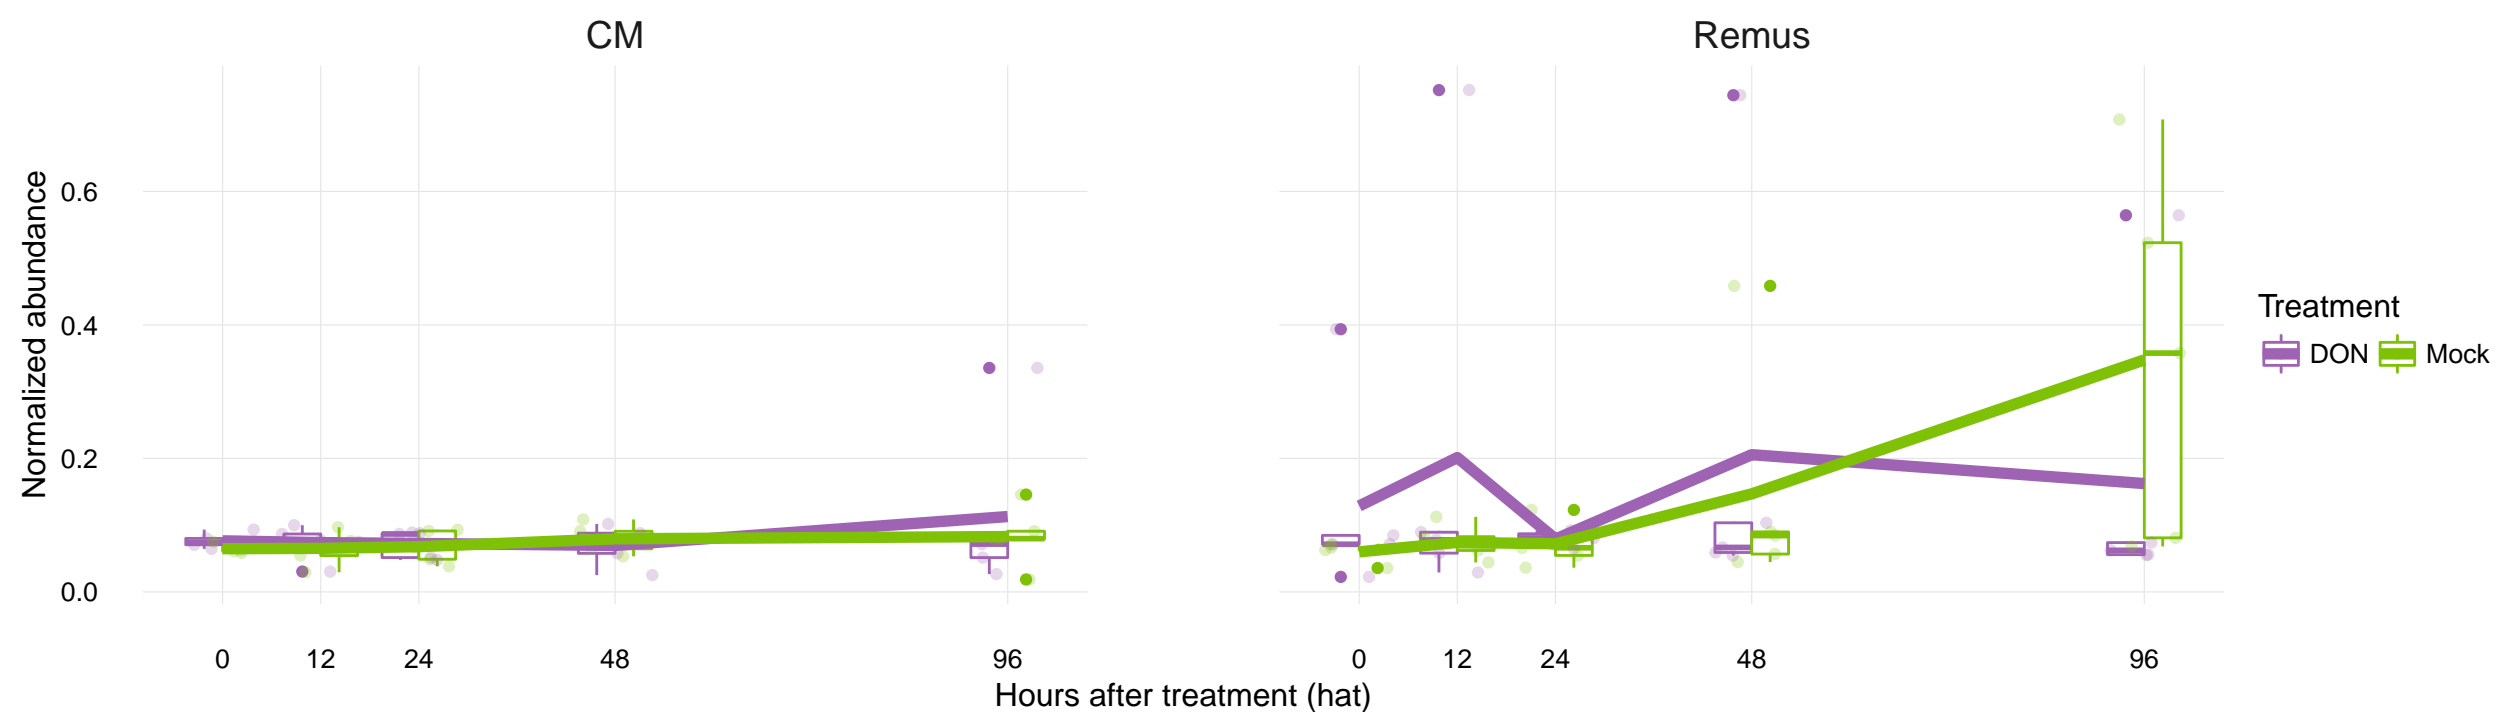

## DON, Mock; all four genotypes

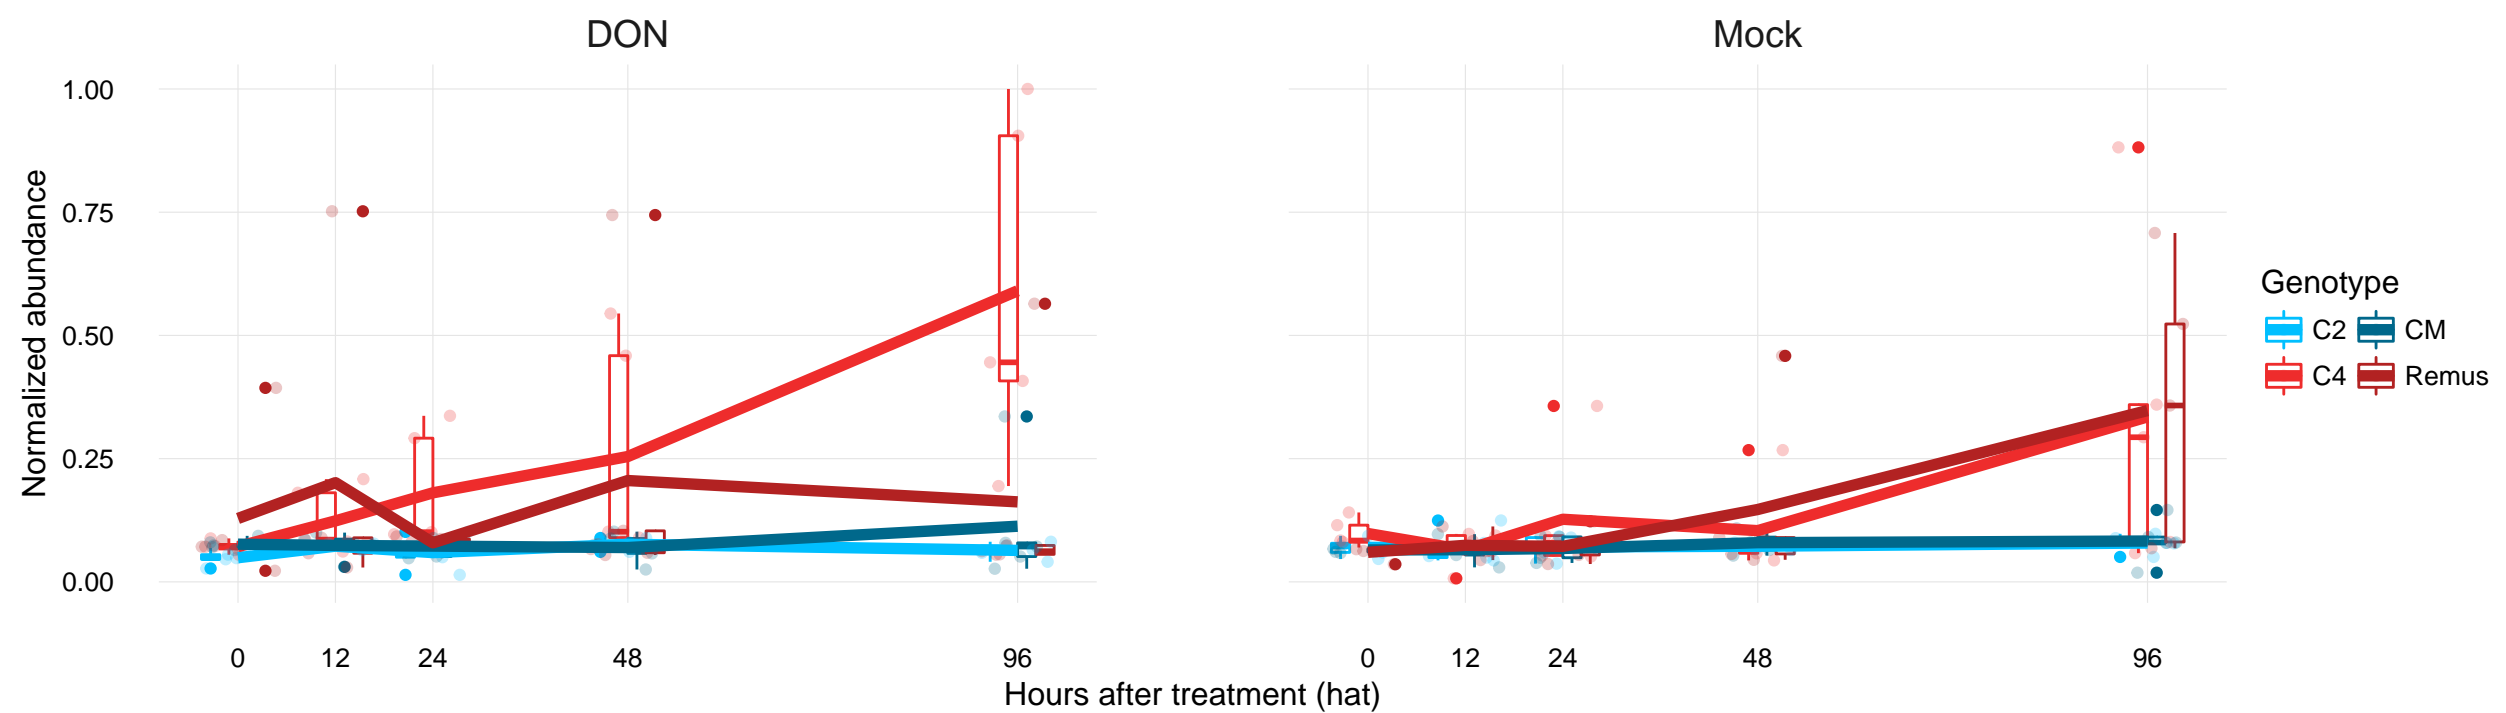



# A.80

Annotated as Lignan  
(1 database hit)

|                |                                                |
|----------------|------------------------------------------------|
| MZ             | 600.2654                                       |
| RT             | 14.55 min                                      |
| Normalization  | Indirectly via surrogate<br>in the KPX samples |
| Cluster        | Cluster 2                                      |
| Cn total / Phe | 28 / 9                                         |

## C2, C4; different treatments

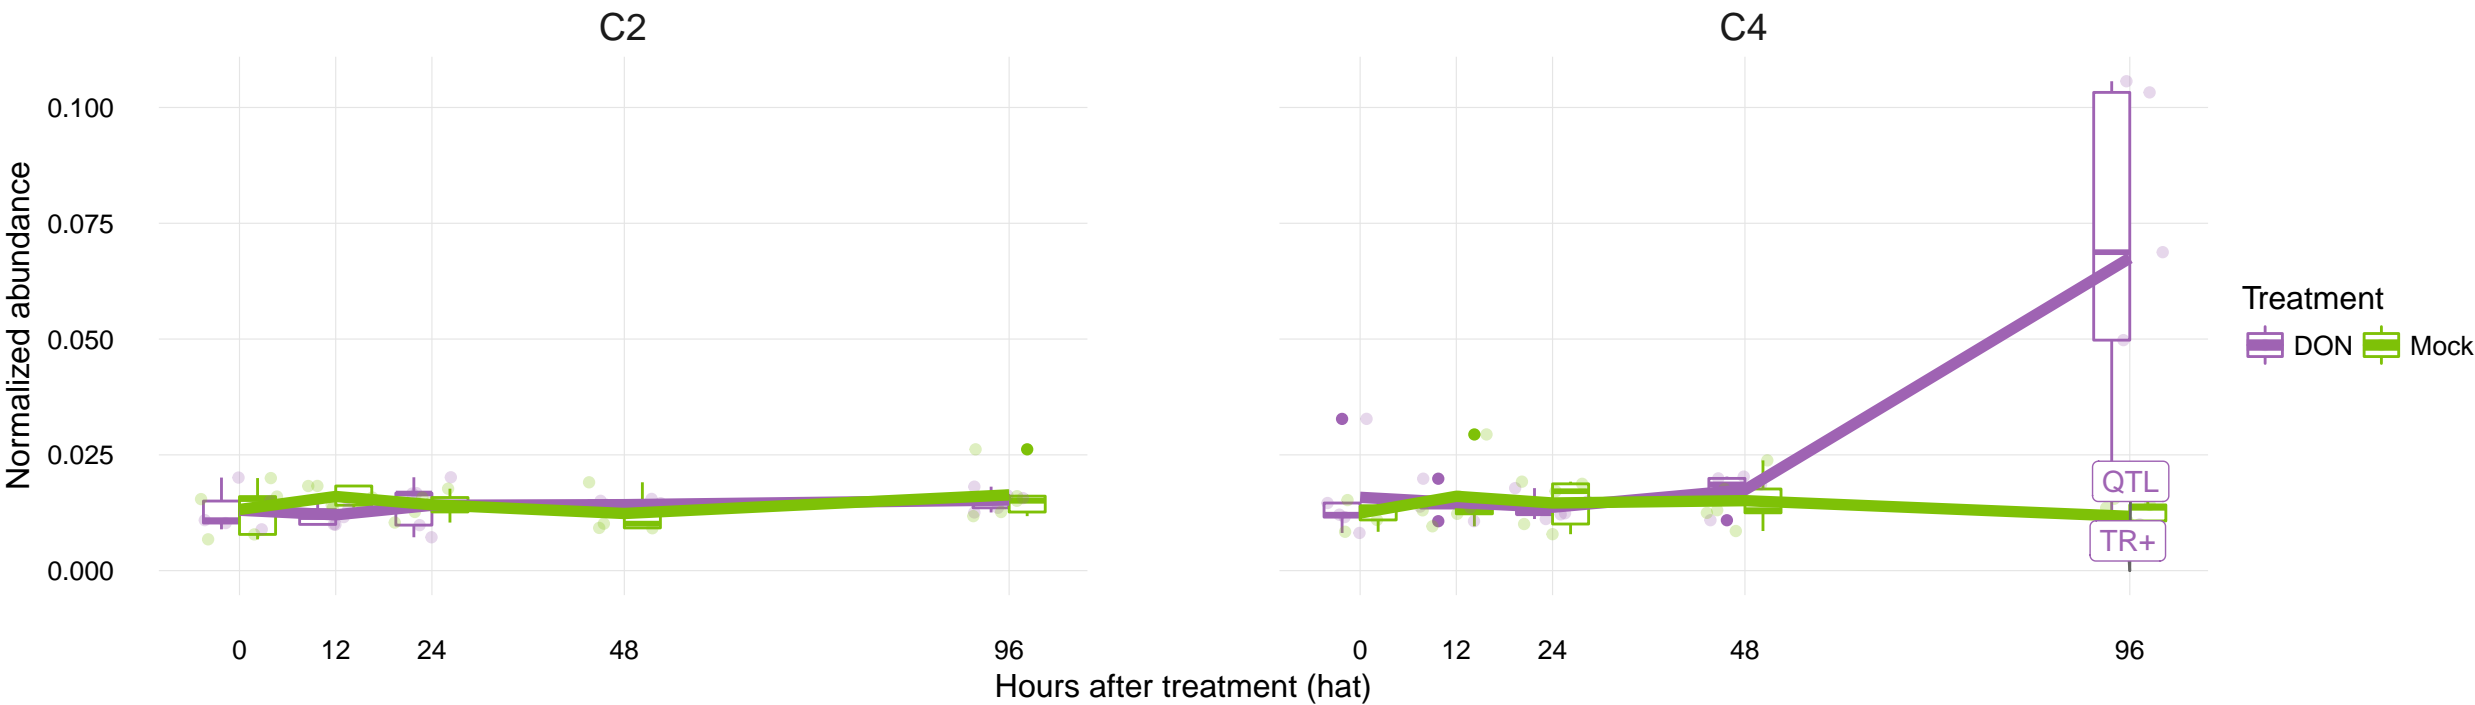

## DON, Mock; different genotypes

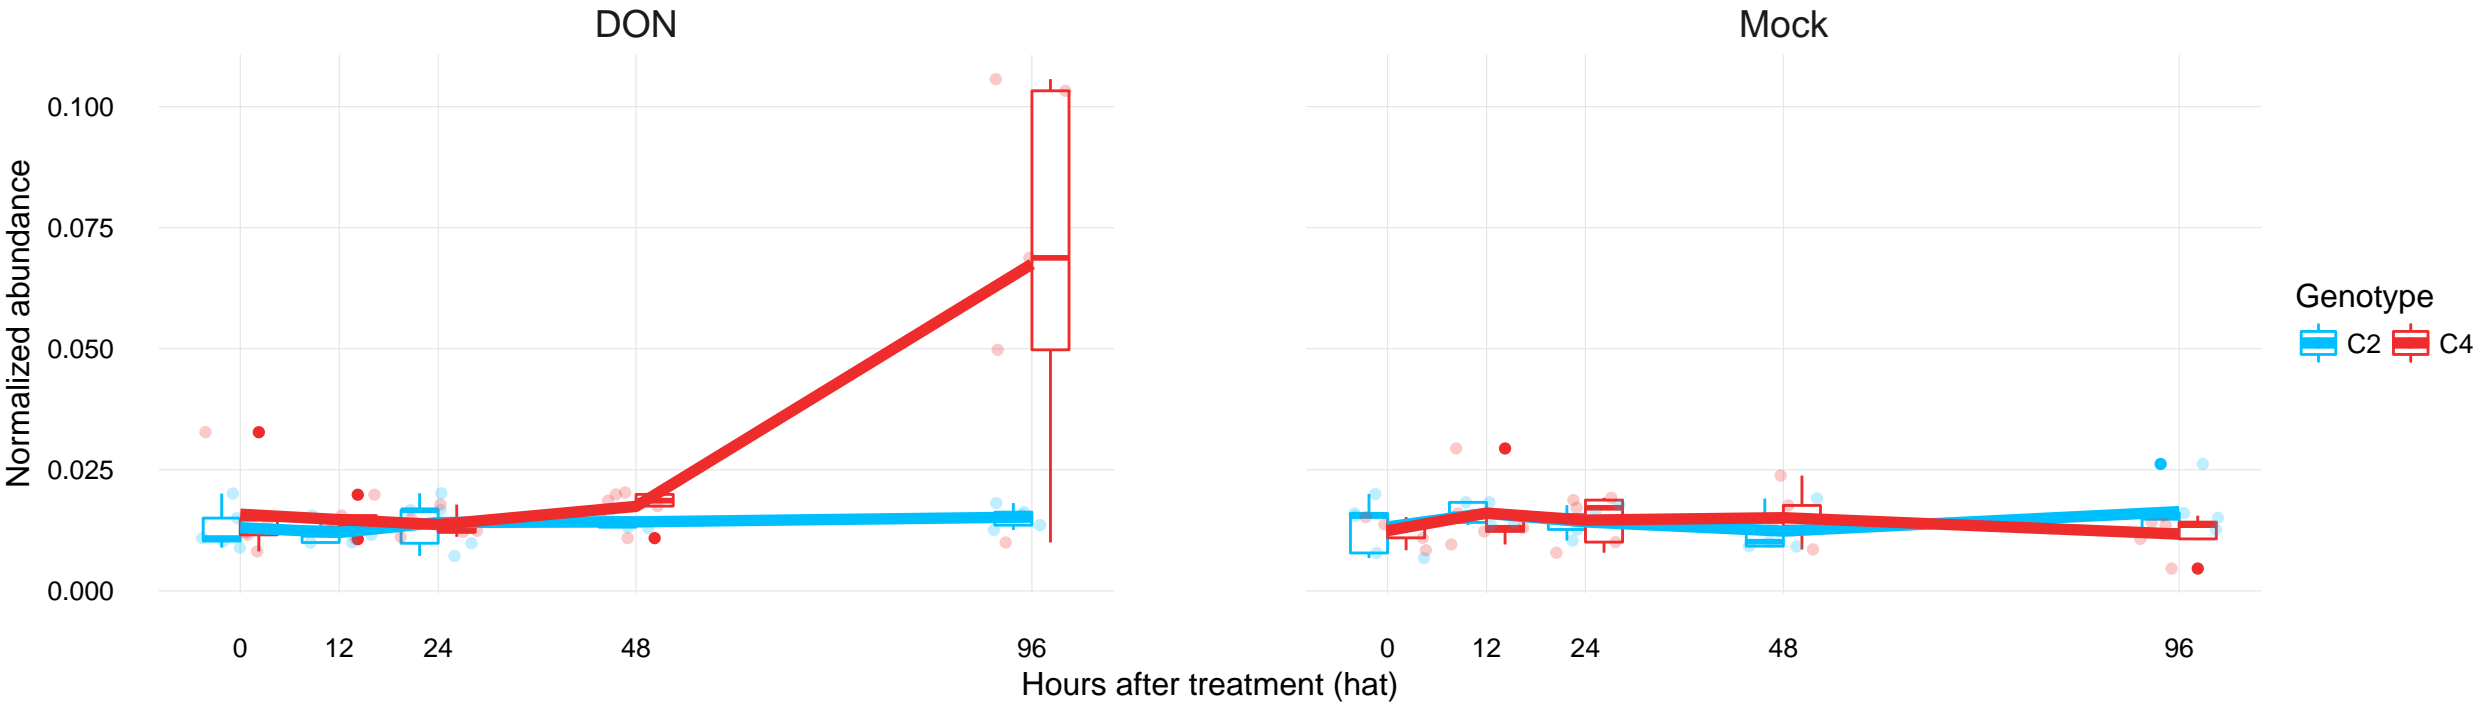

## CM, Remus; different treatments

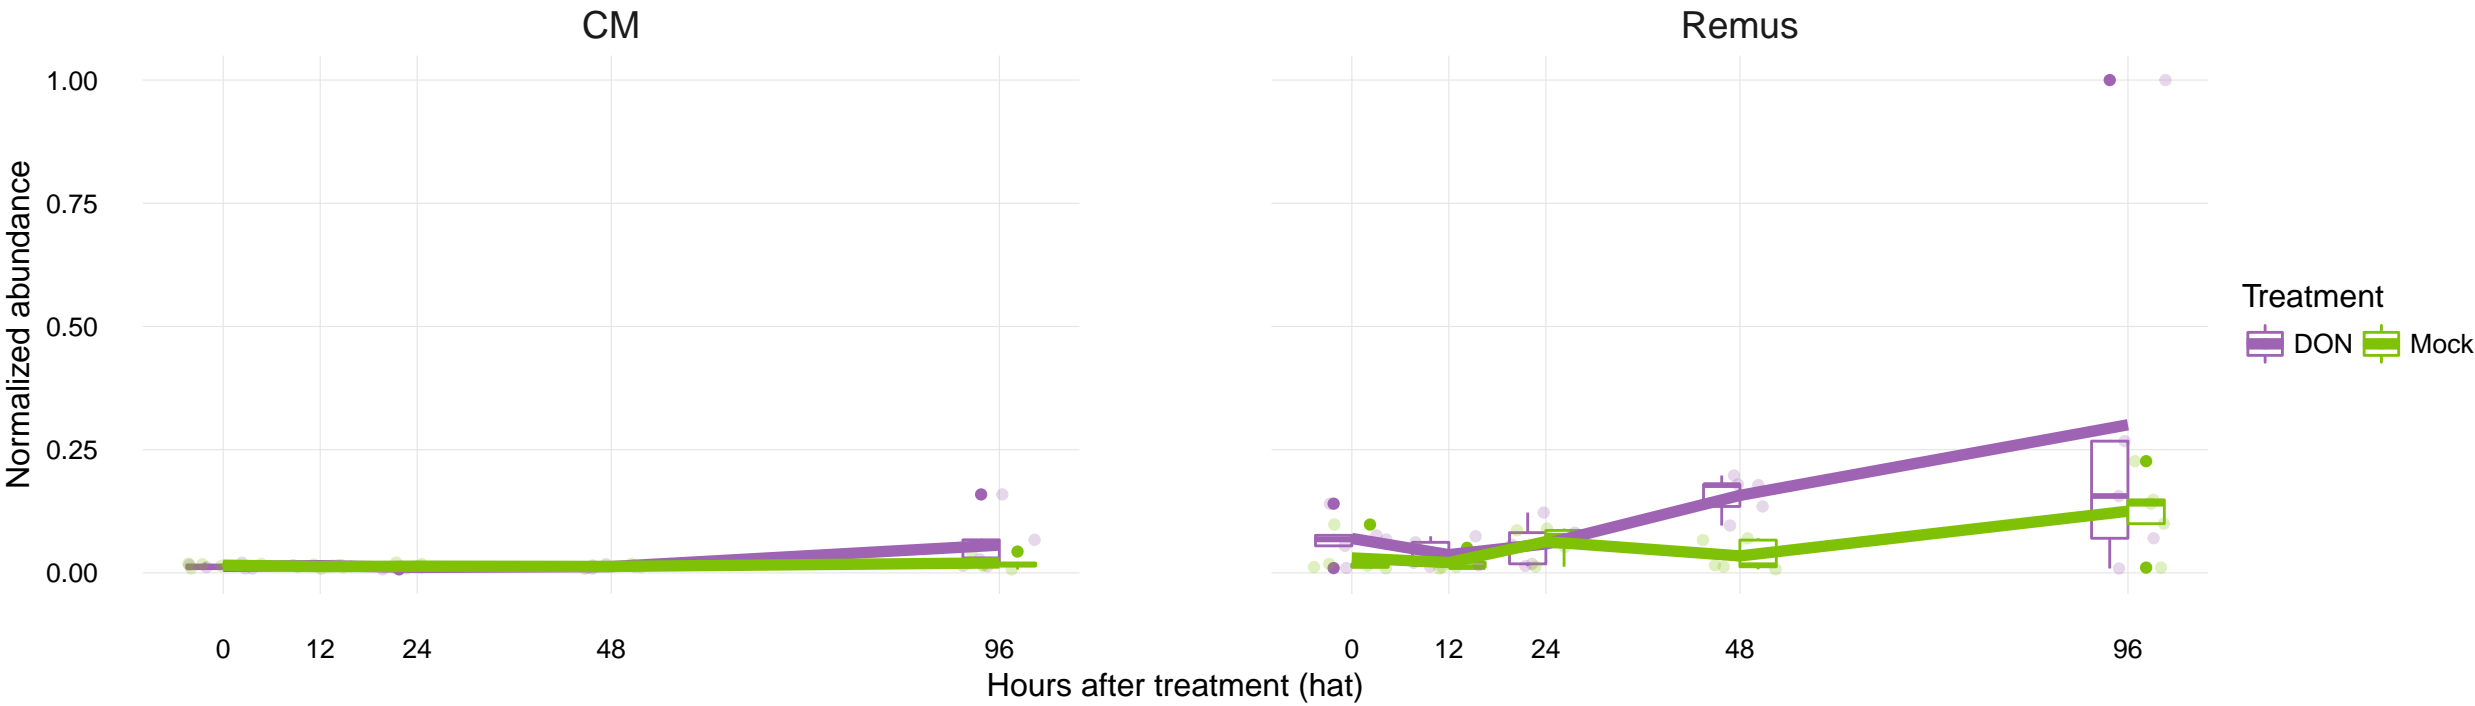

## DON, Mock; all four genotypes

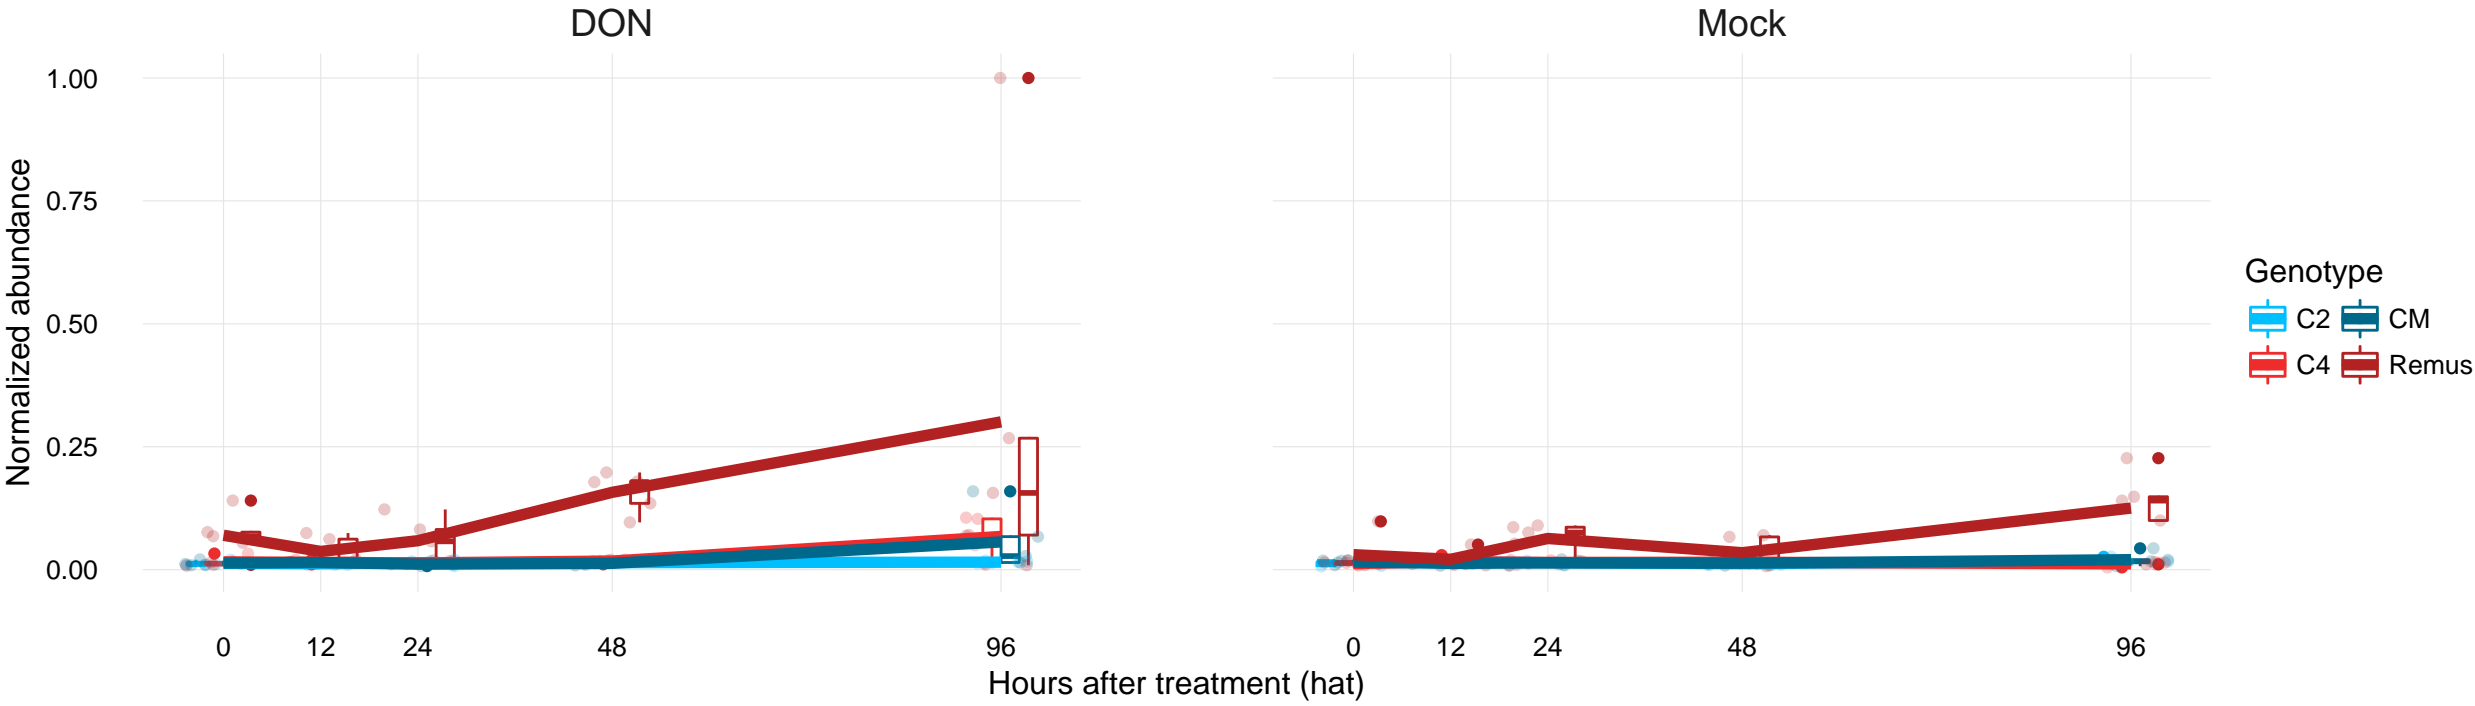

# A.61

Annotated as HCA derivative  
(1 database hit)

|                |                                                |
|----------------|------------------------------------------------|
| MZ             | 586.2496                                       |
| RT             | 12.88 min                                      |
| Normalization  | Indirectly via surrogate<br>in the KPX samples |
| Cluster        | Cluster 2                                      |
| Cn total / Phe | 27 / 9                                         |

## C2, C4; different treatments

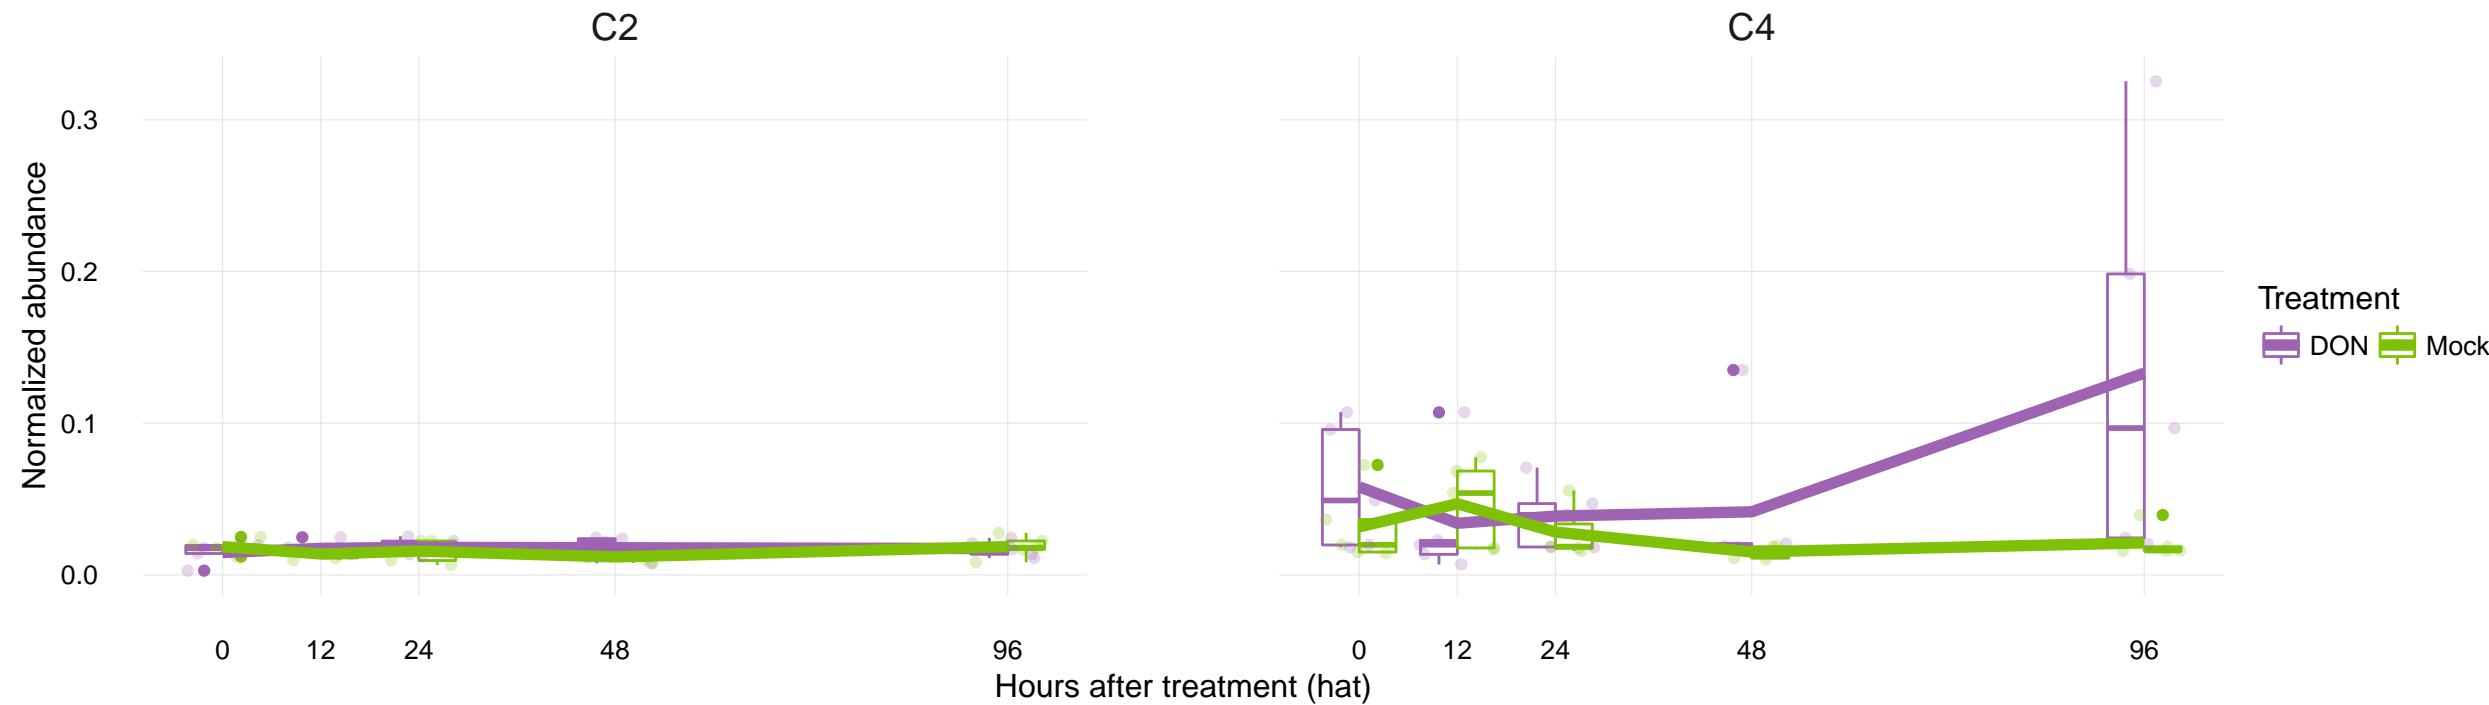

## DON, Mock; different genotypes

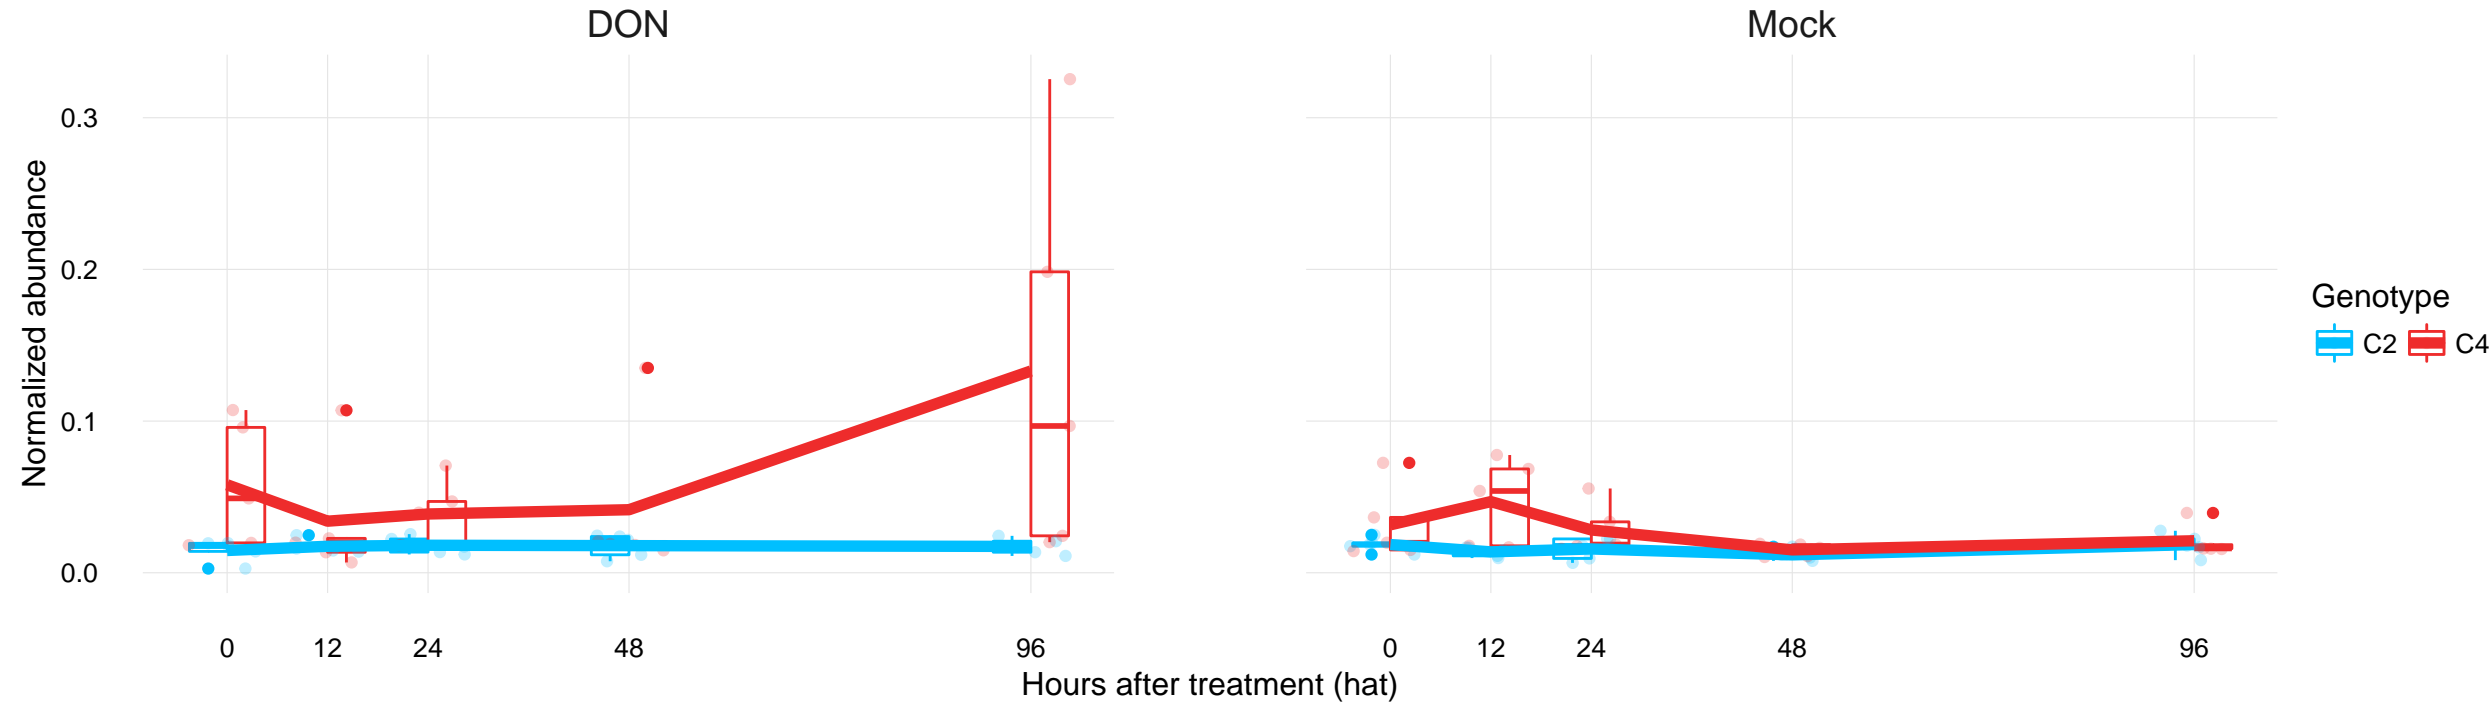

## CM, Remus; different treatments

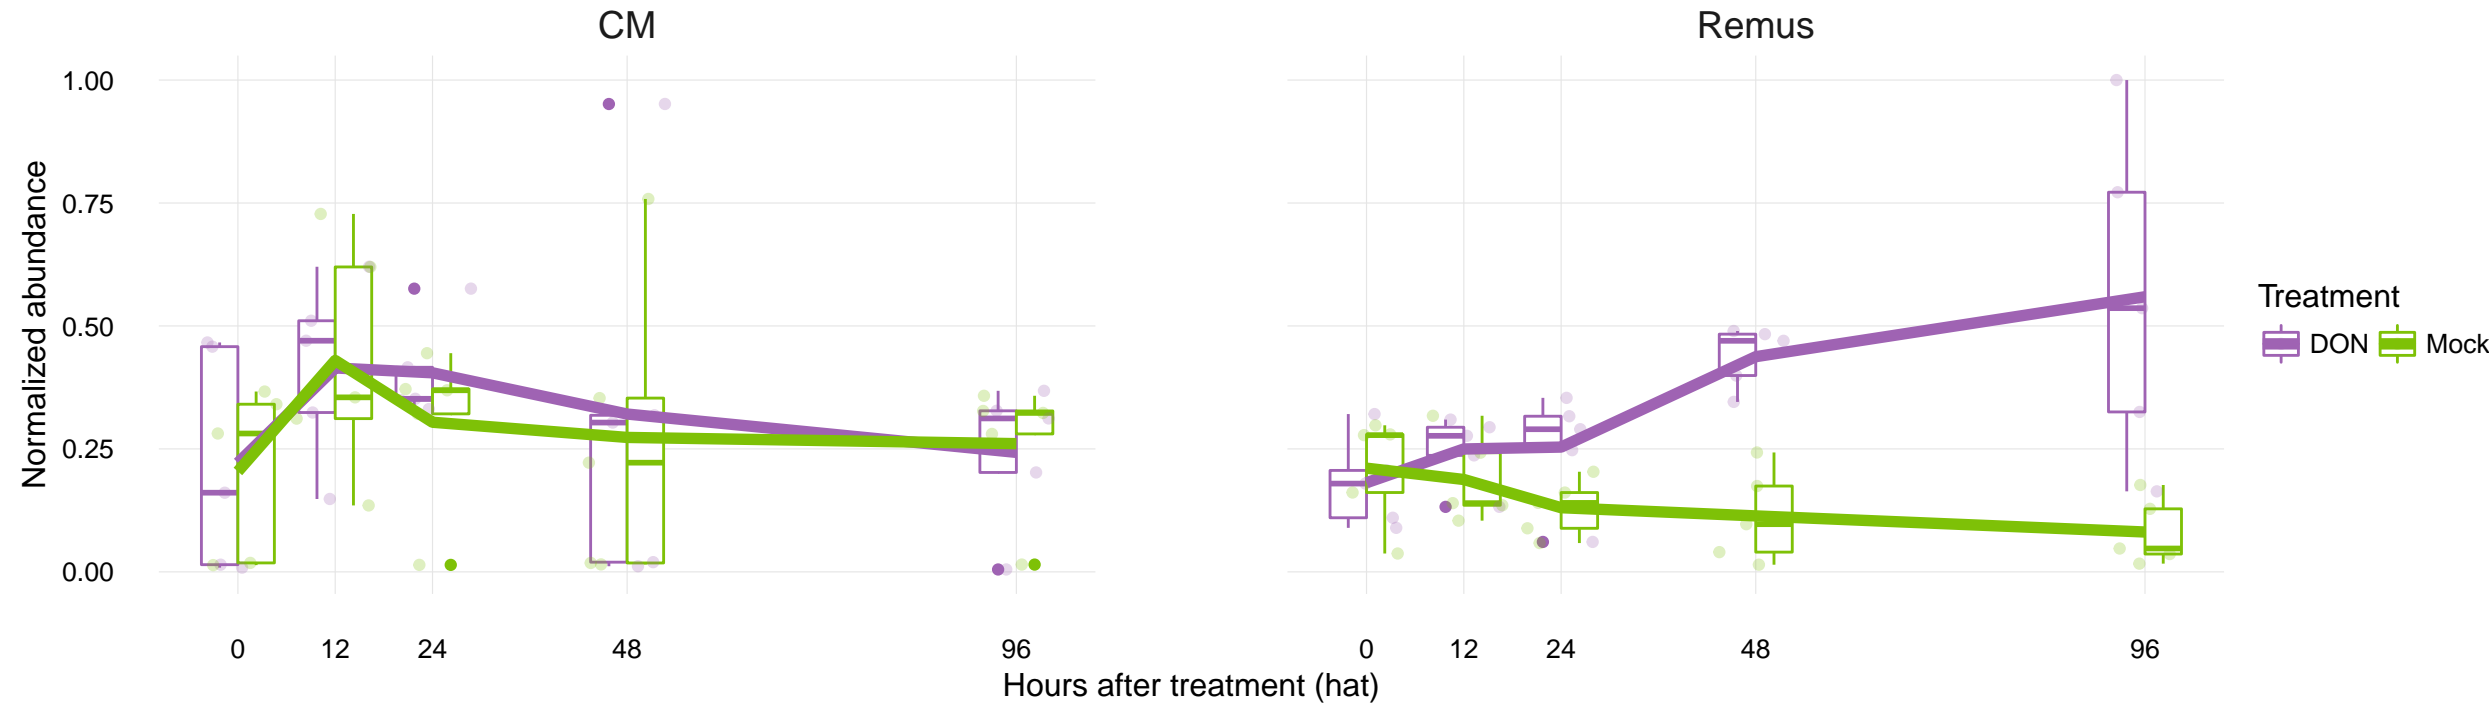

## DON, Mock; all four genotypes

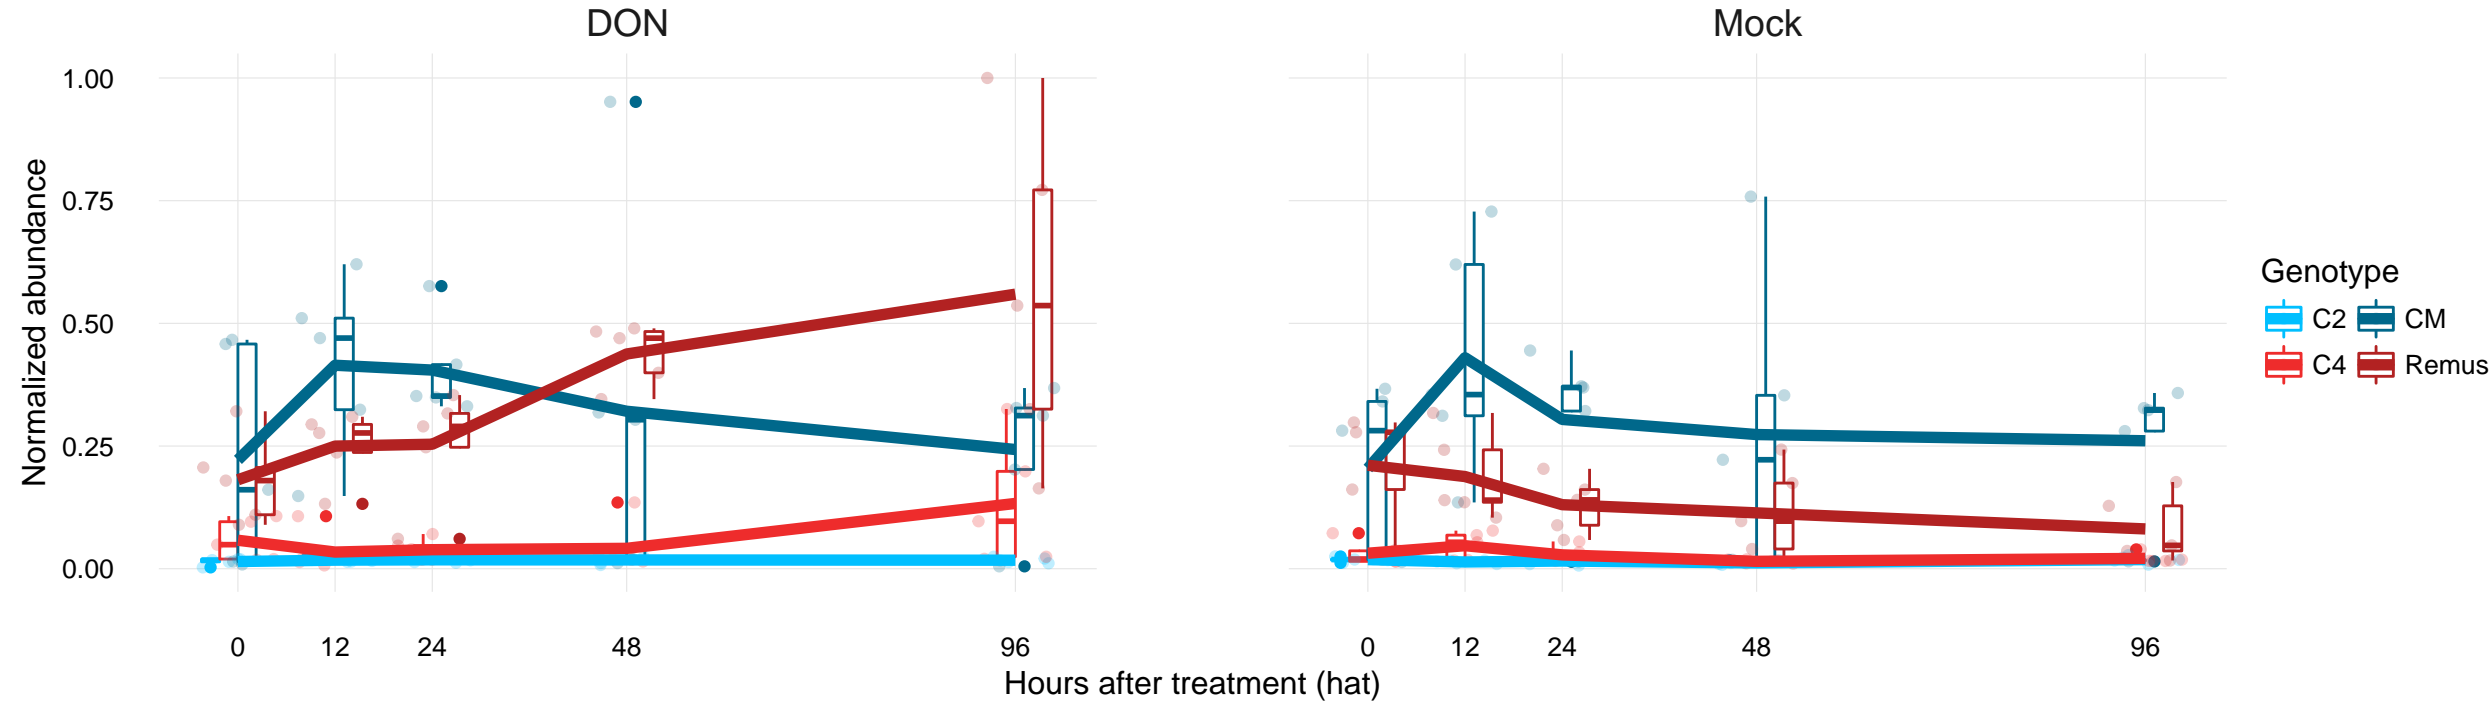

# A.119

Annotated as Flavonoid  
(21 database hits)

|                |                                                |
|----------------|------------------------------------------------|
| MZ             | 371.149                                        |
| RT             | 19 min                                         |
| Normalization  | Indirectly via surrogate<br>in the KPX samples |
| Cluster        | Cluster 2                                      |
| Cn total / Phe | 21 /                                           |

## C2, C4; different treatments

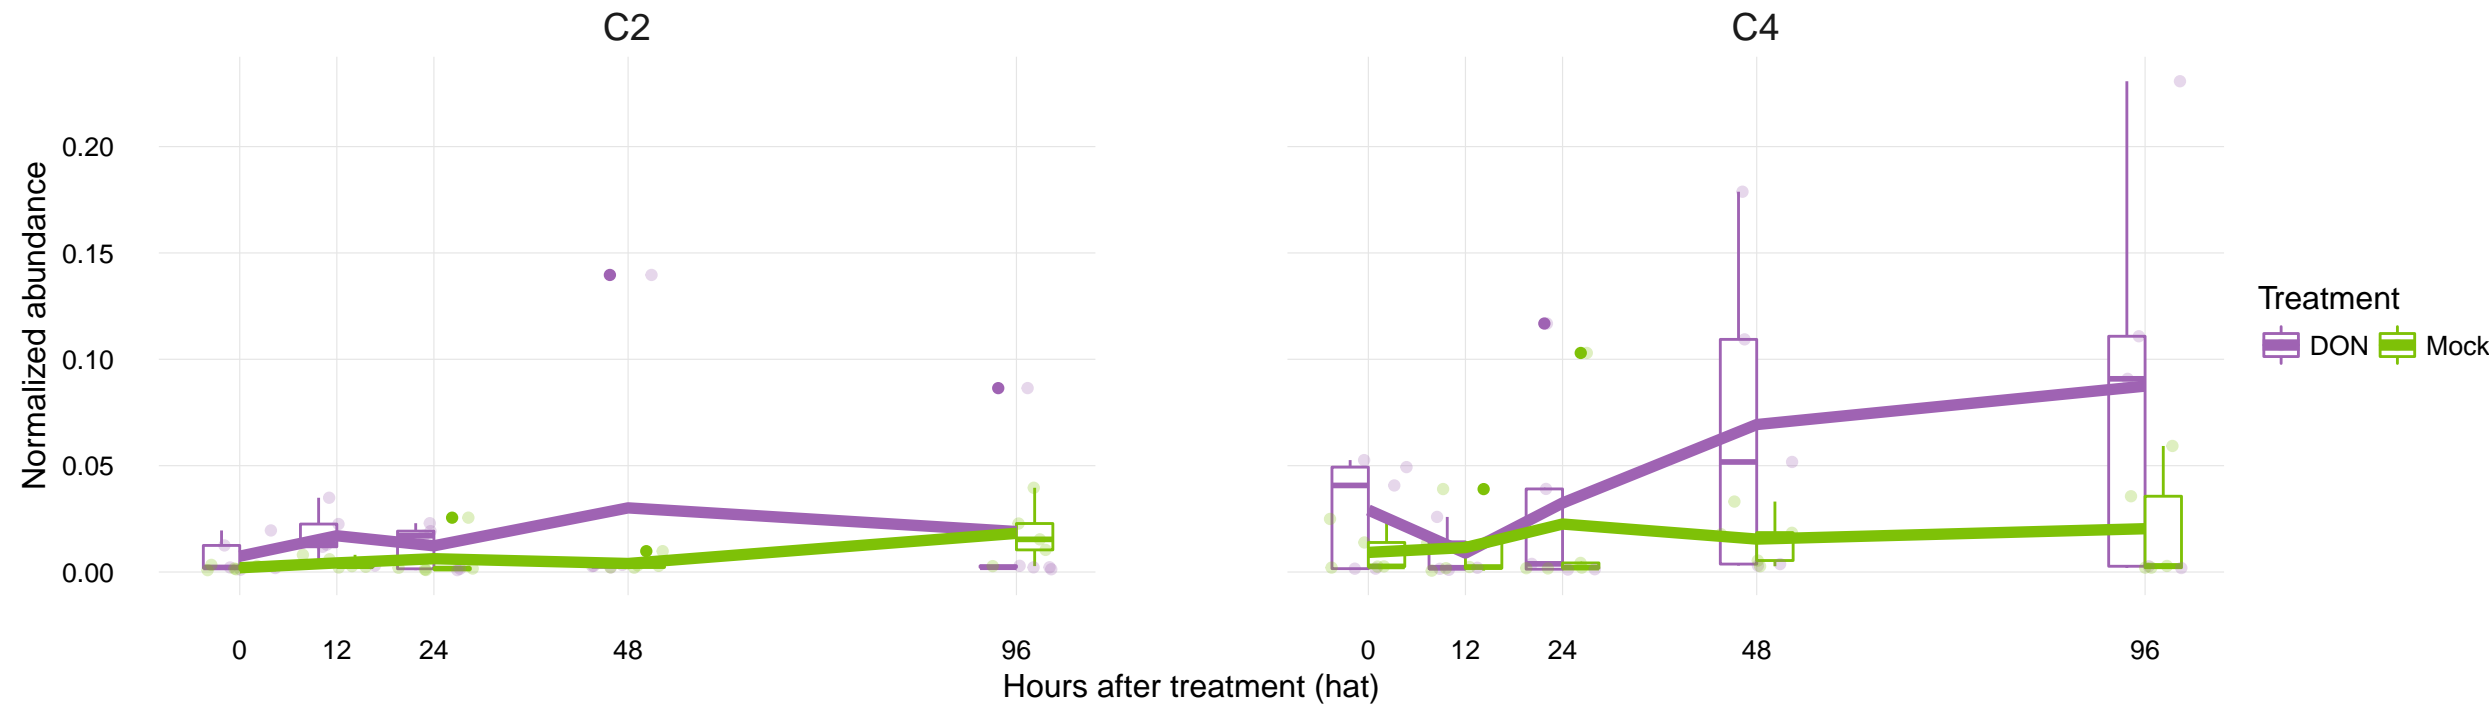

## DON, Mock; different genotypes

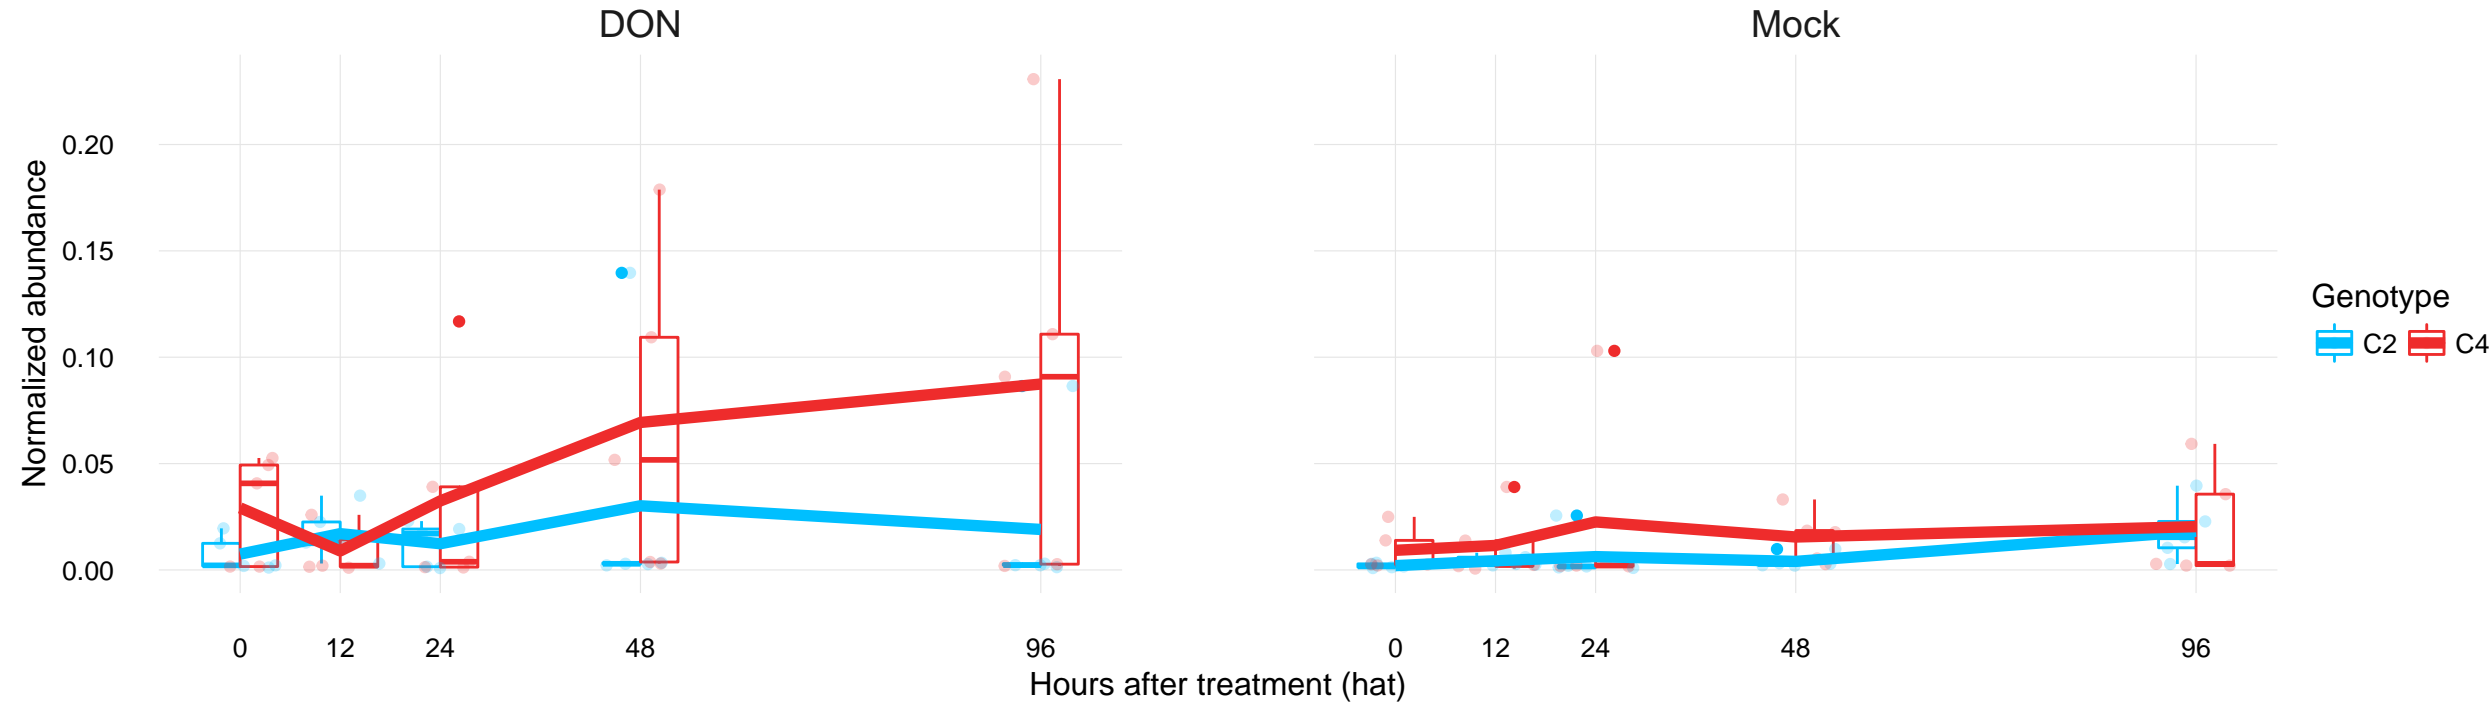

## CM, Remus; different treatments

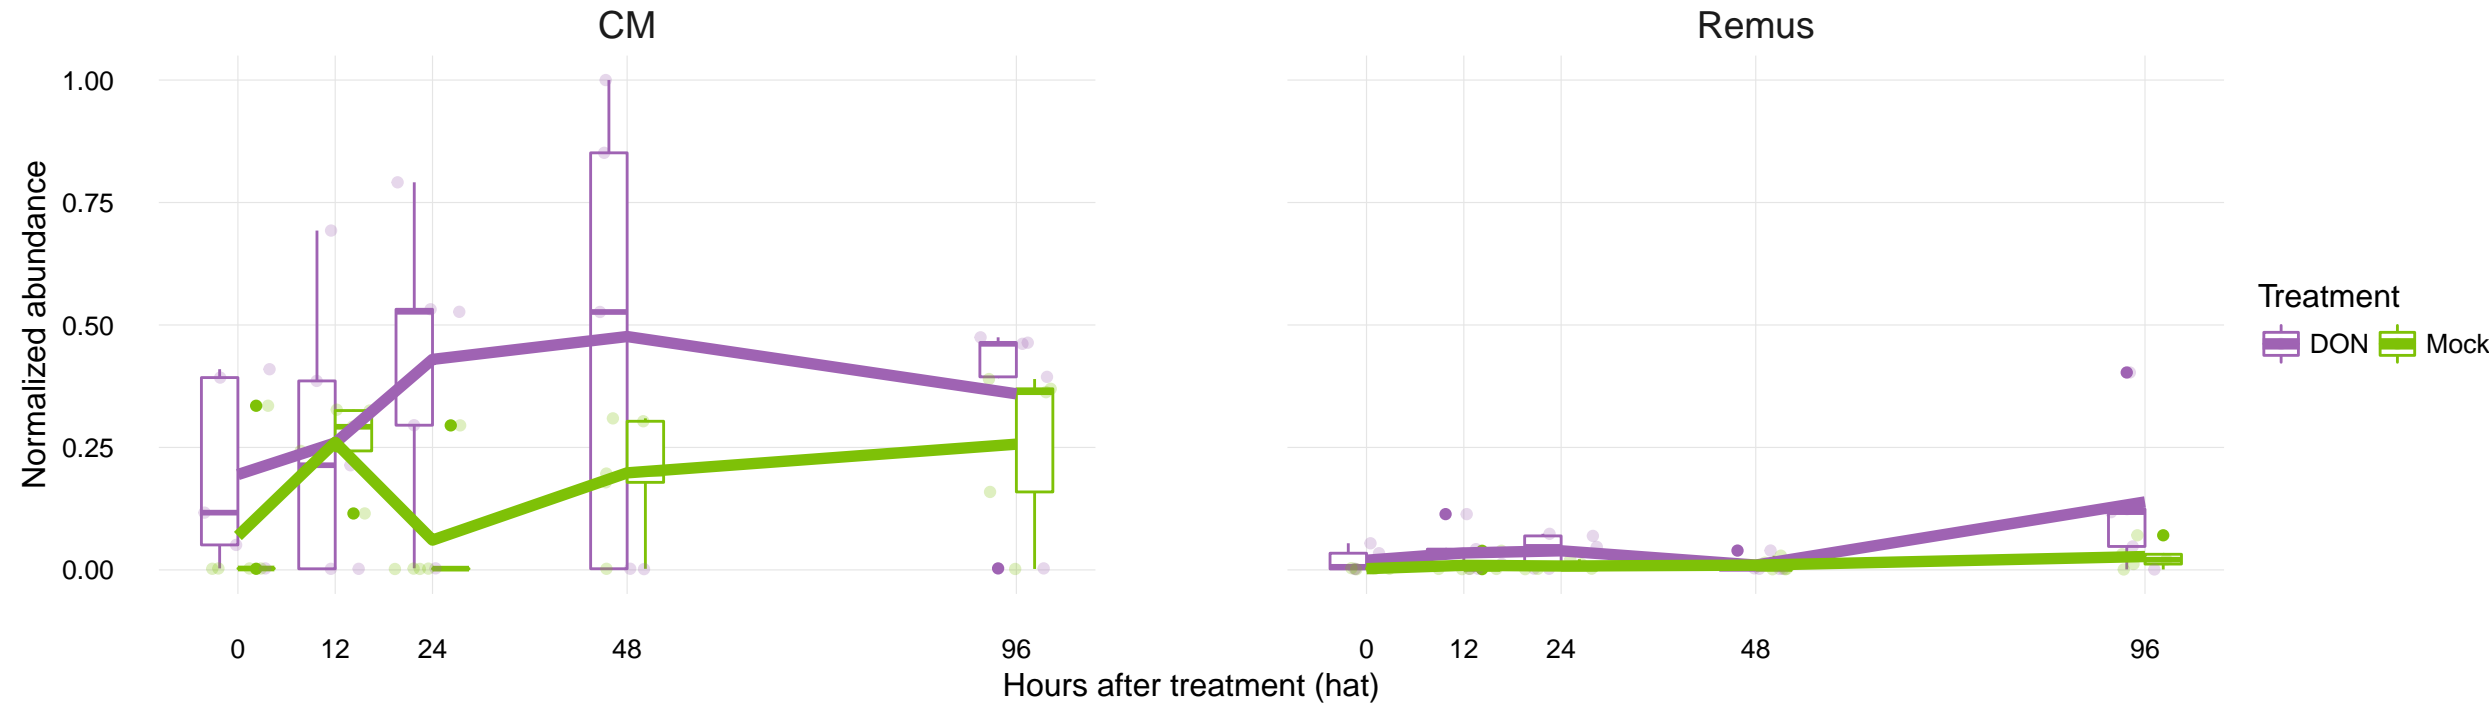

## DON, Mock; all four genotypes

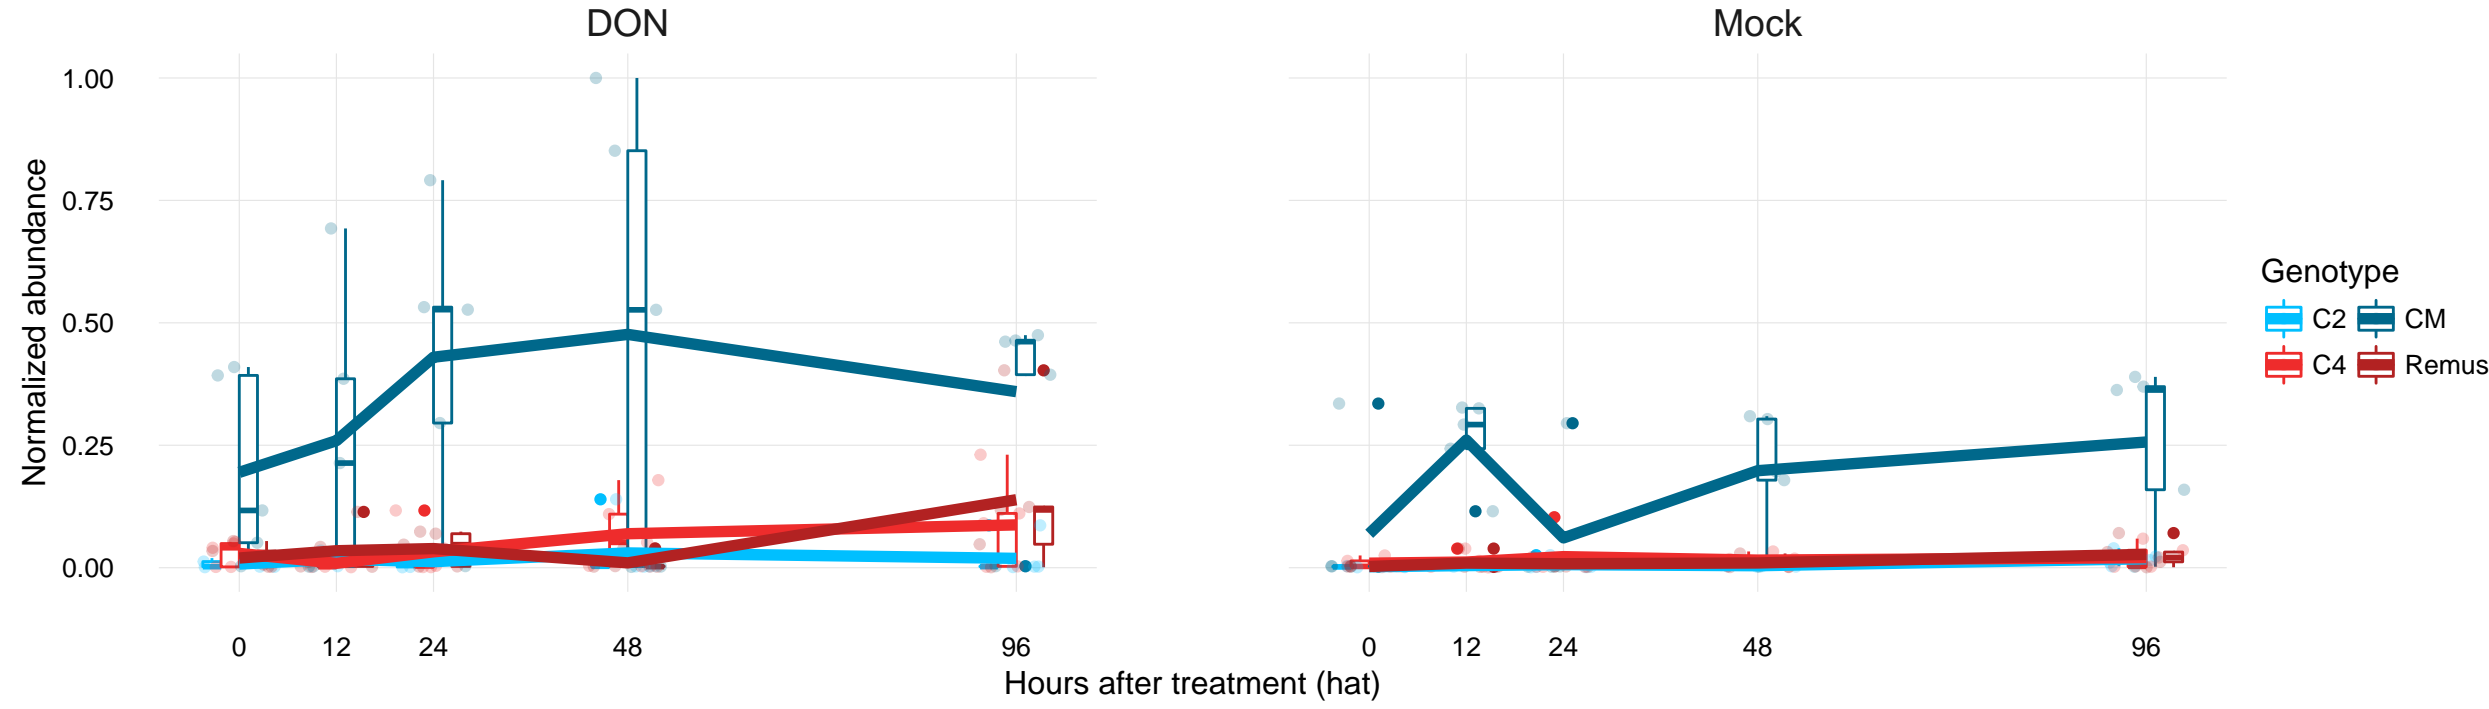

A.65

Annotated as Lignan  
(1 database hit)

|                |                                                |
|----------------|------------------------------------------------|
| MZ             | 540.2439                                       |
| RT             | 13.15 min                                      |
| Normalization  | Indirectly via surrogate<br>in the KPX samples |
| Cluster        | Cluster 2                                      |
| Cn total / Phe | 26 / 18                                        |

C2, C4; different treatments

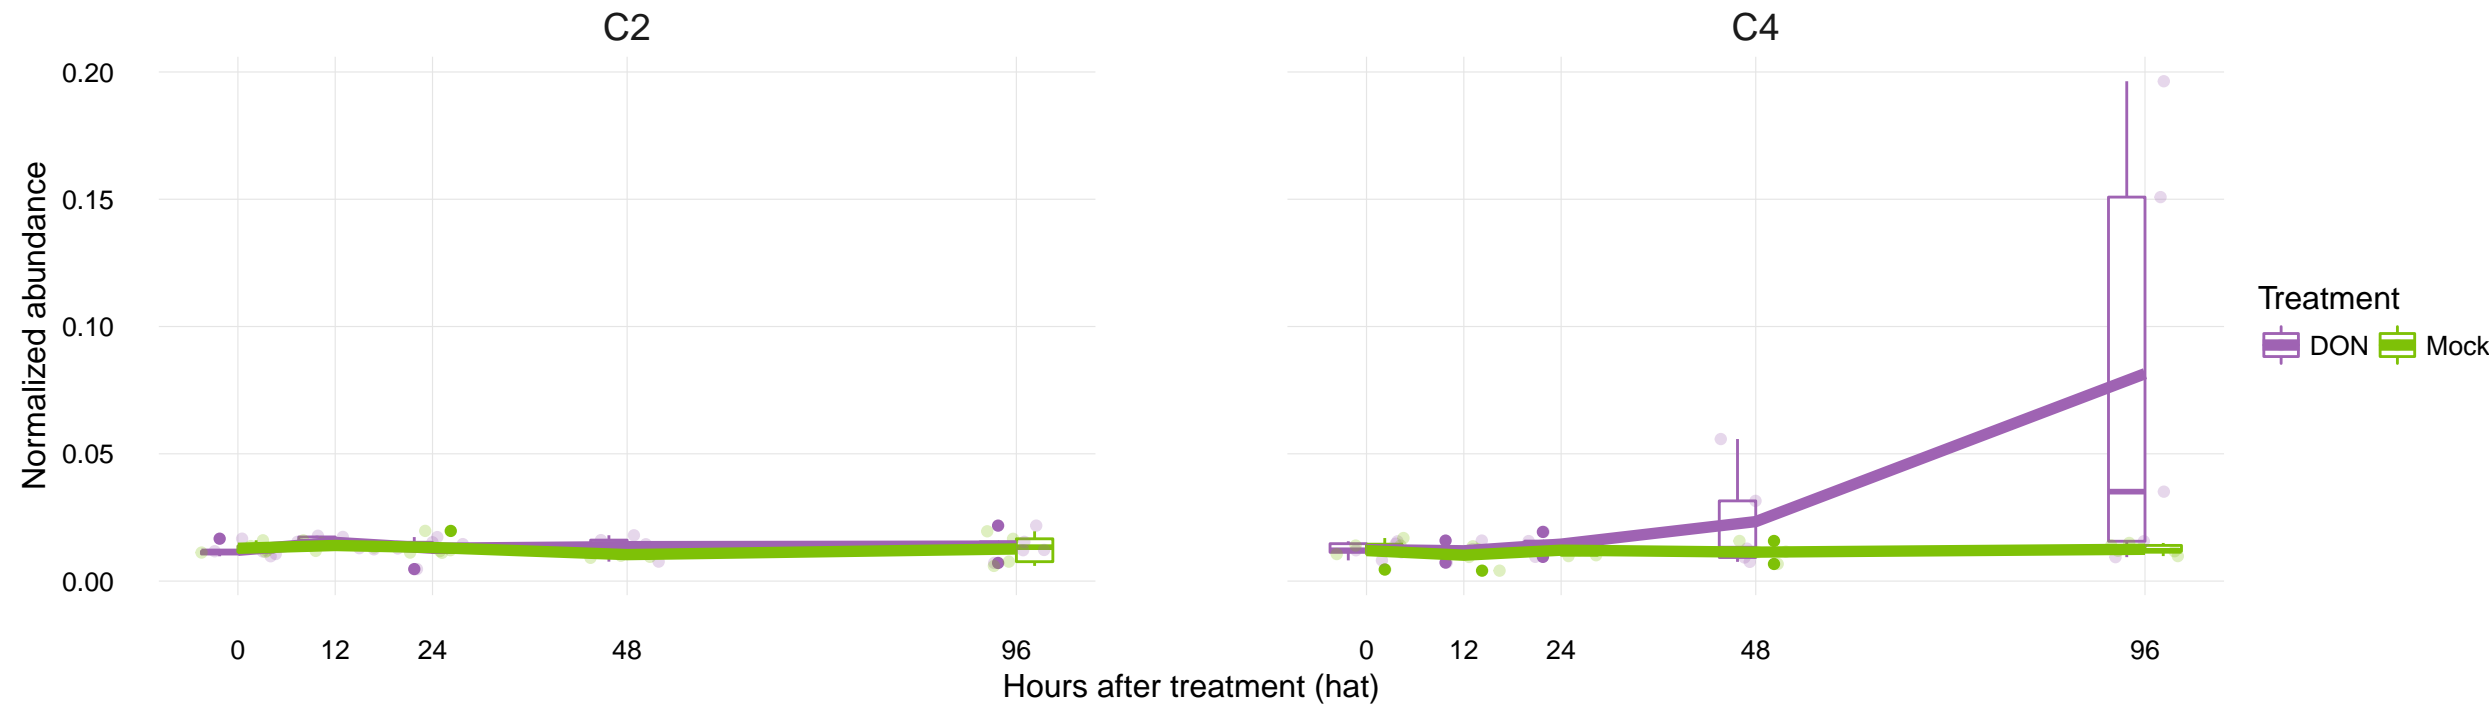

DON, Mock; different genotypes

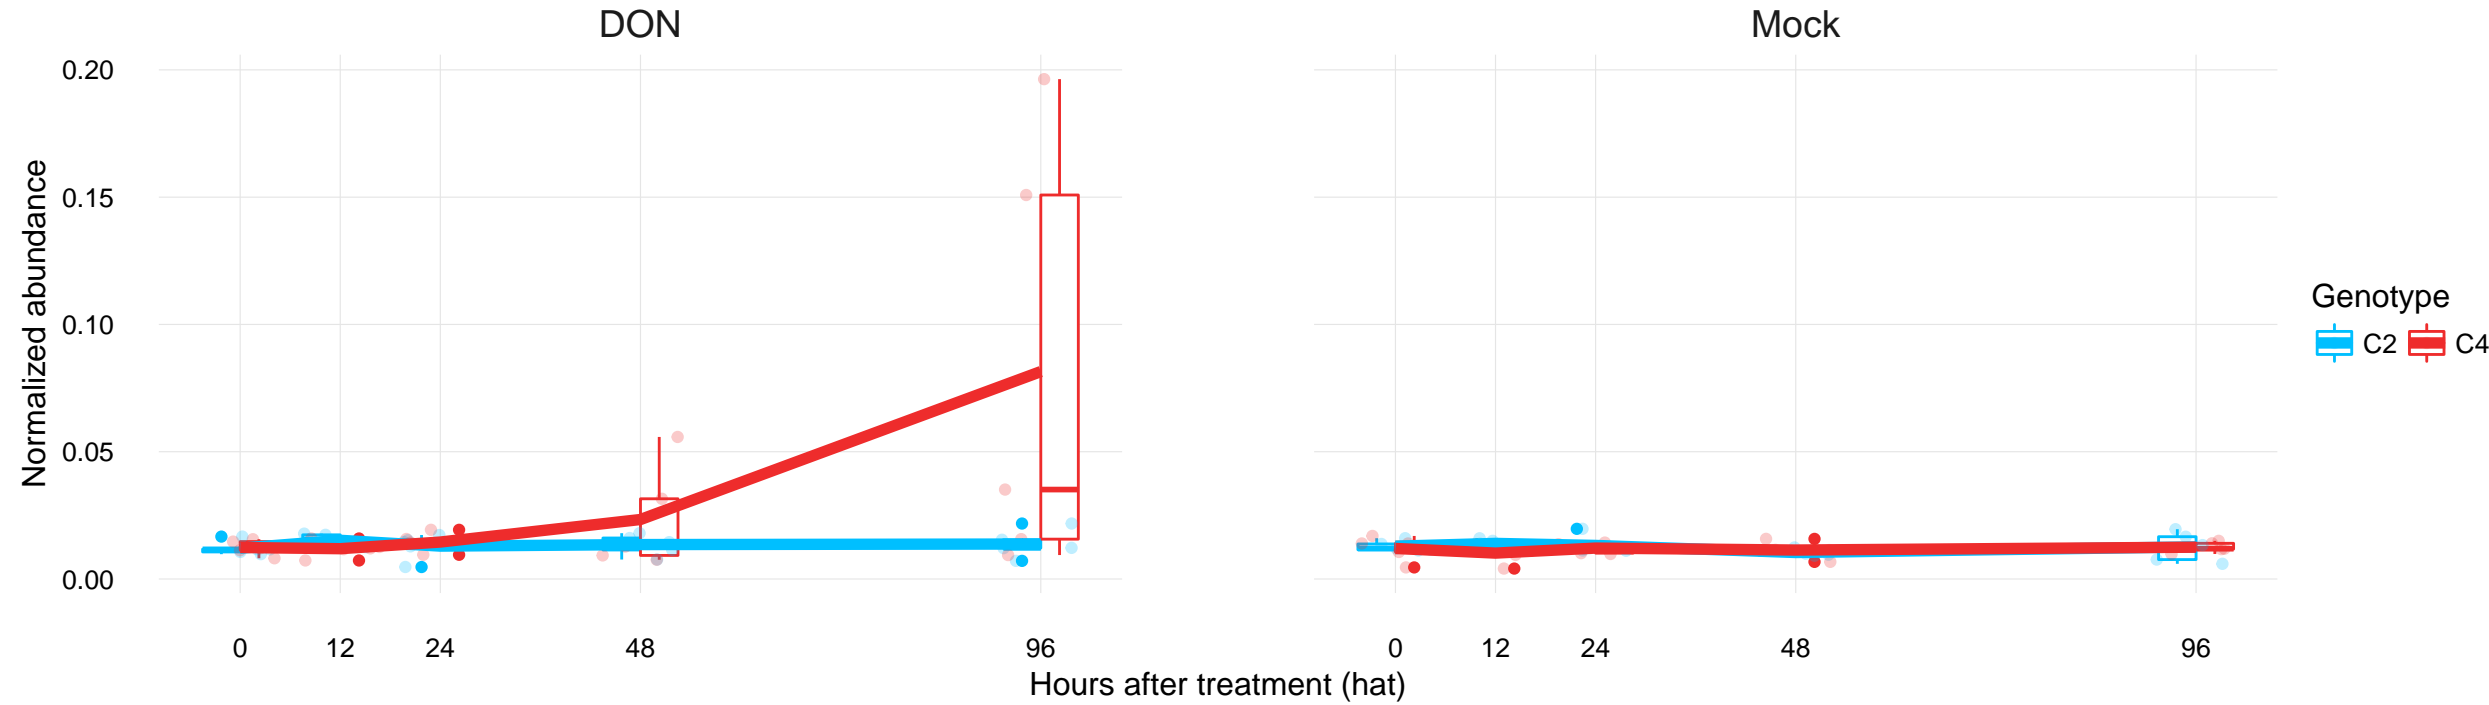

CM, Remus; different treatments

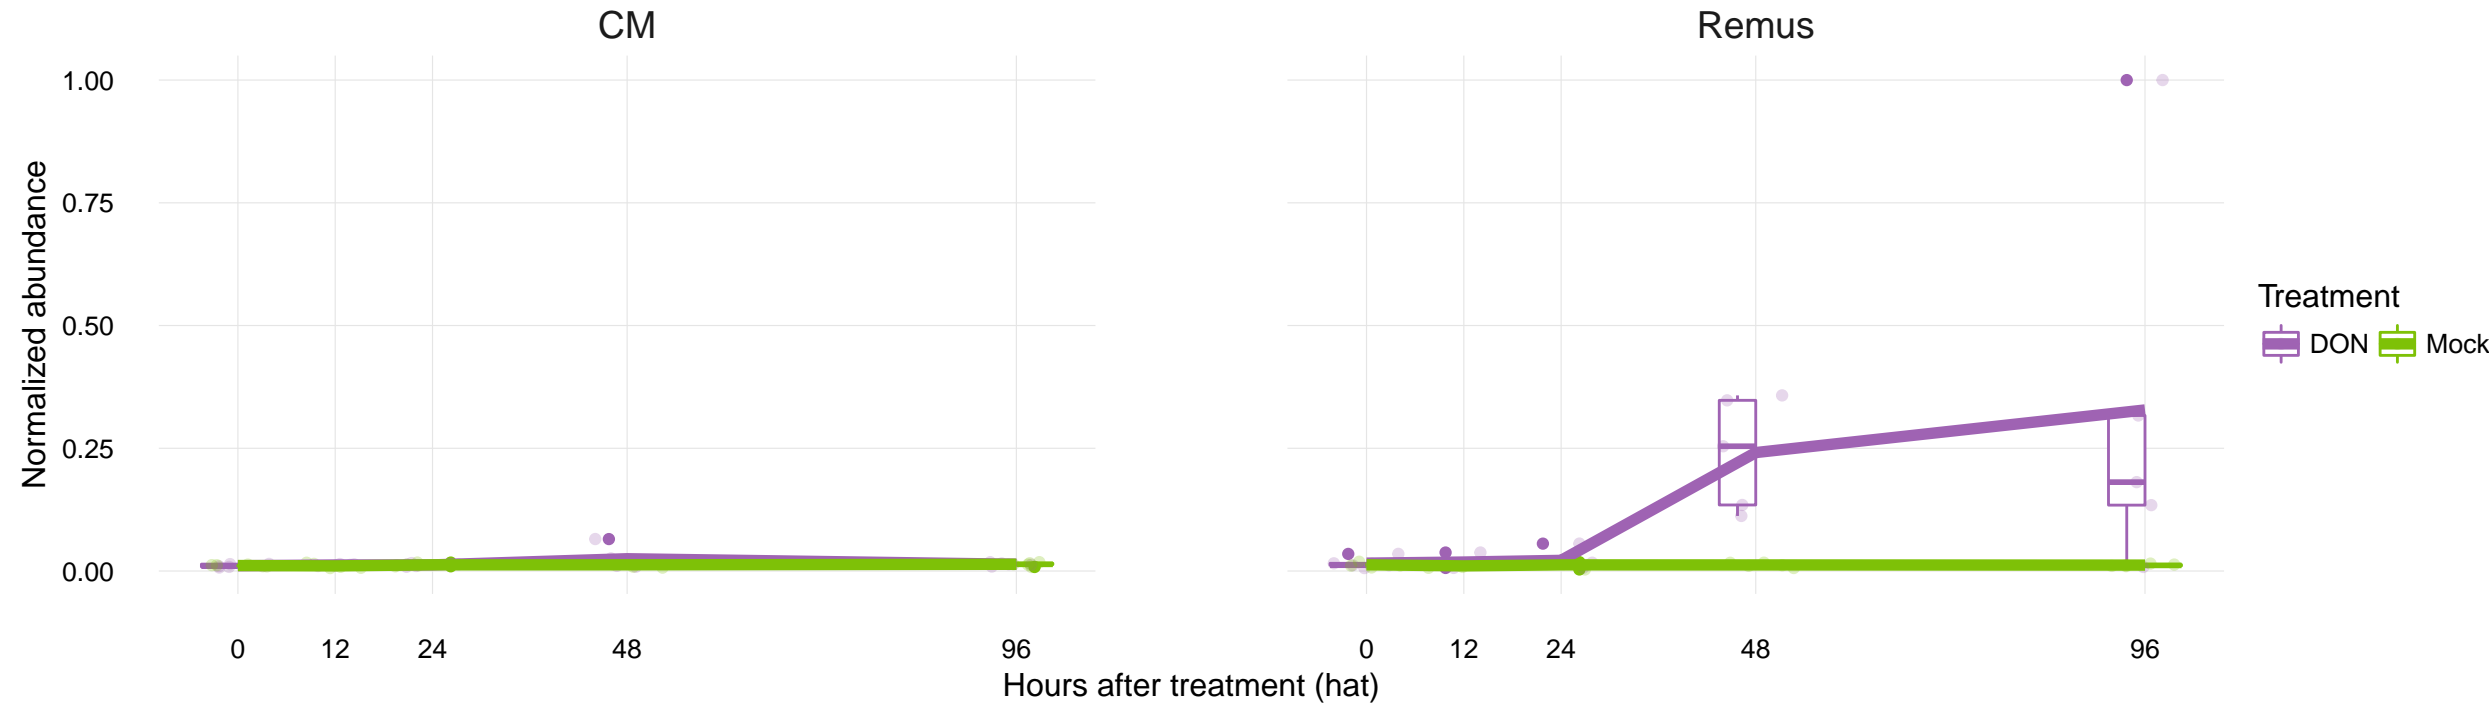

DON, Mock; all four genotypes

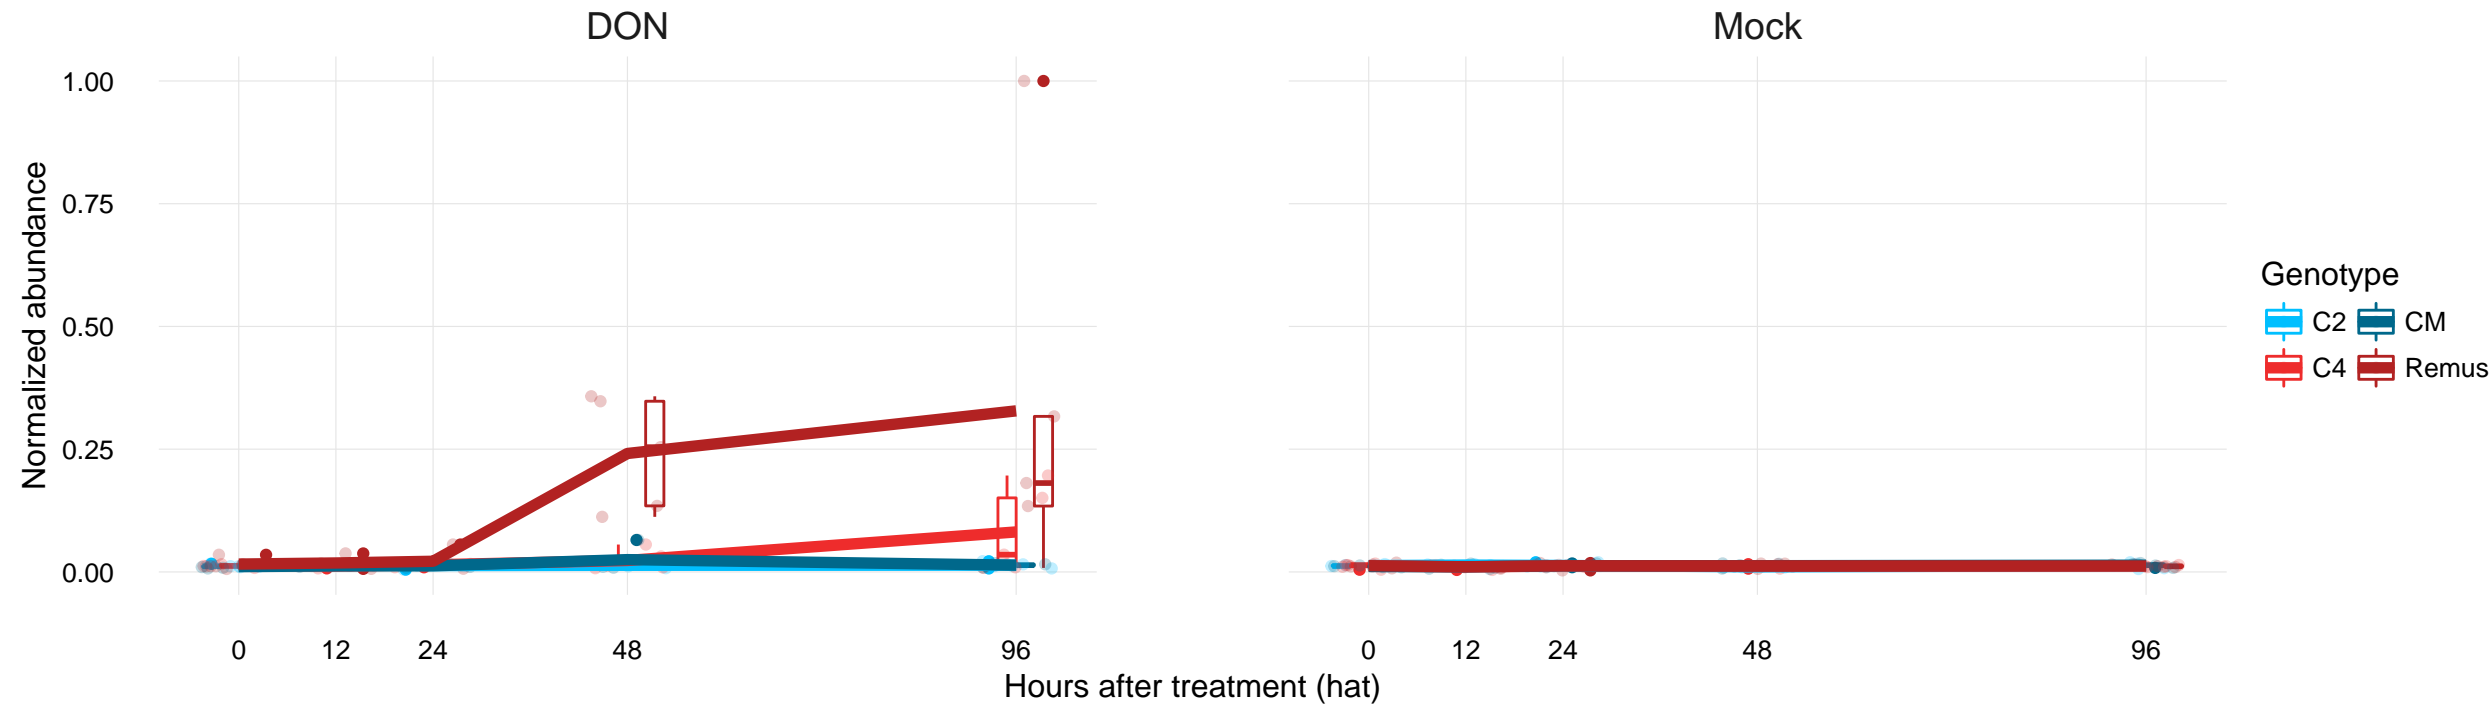

# A.62

Annotated as Putative phenylacetic acid derivative  
(8 database hits)

|                |                                                |
|----------------|------------------------------------------------|
| MZ             | 369.1182                                       |
| RT             | 12.97 min                                      |
| Normalization  | Indirectly via surrogate<br>in the KPX samples |
| Cluster        | Cluster 2                                      |
| Cn total / Phe | 17 / 8                                         |

## C2, C4; different treatments

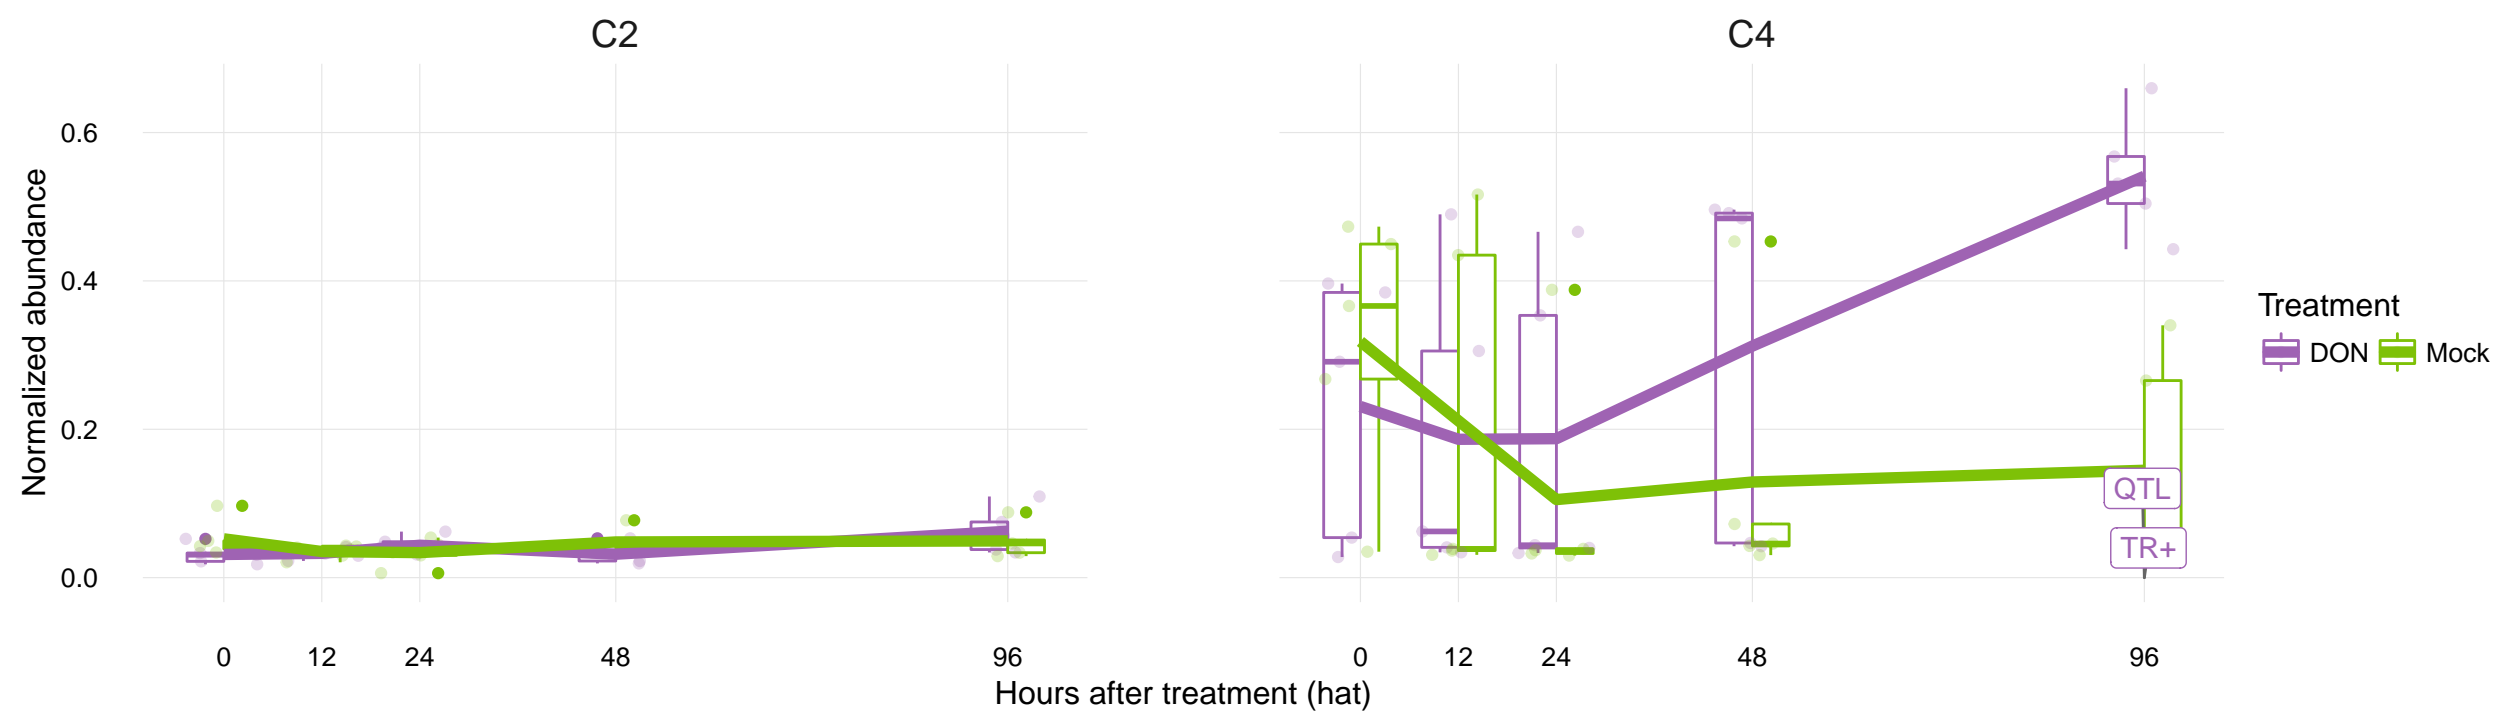

## DON, Mock; different genotypes

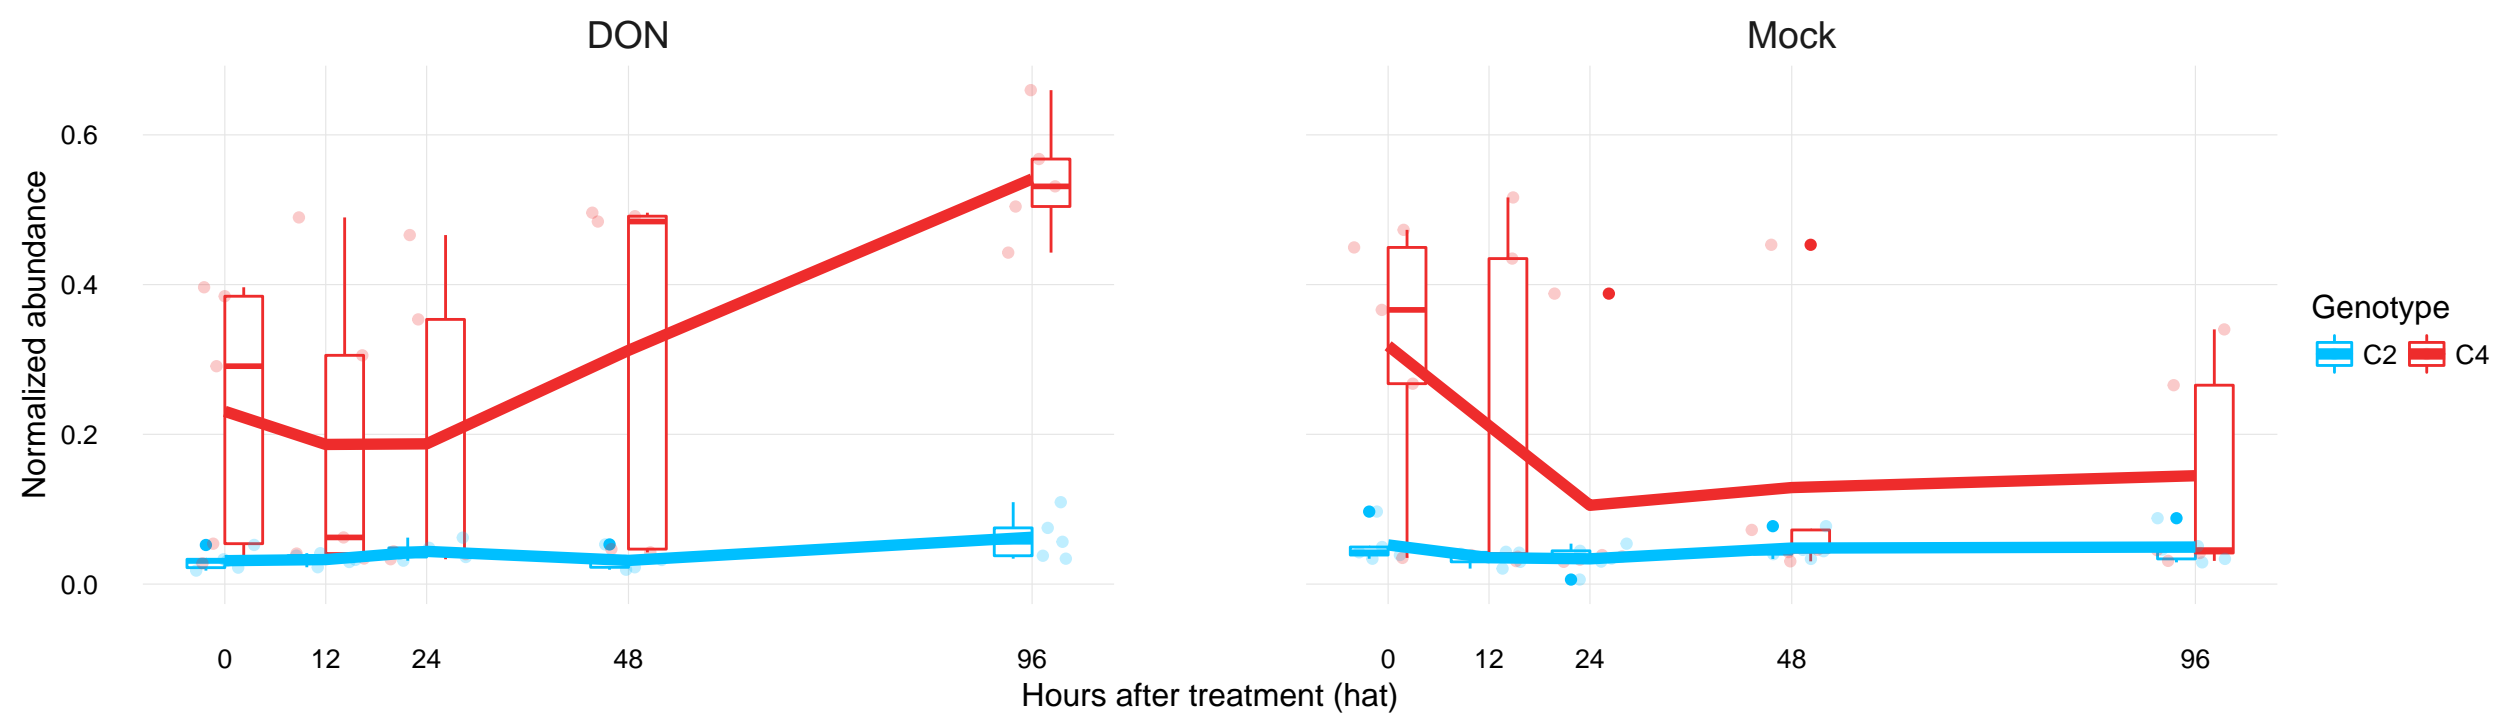

## CM, Remus; different treatments

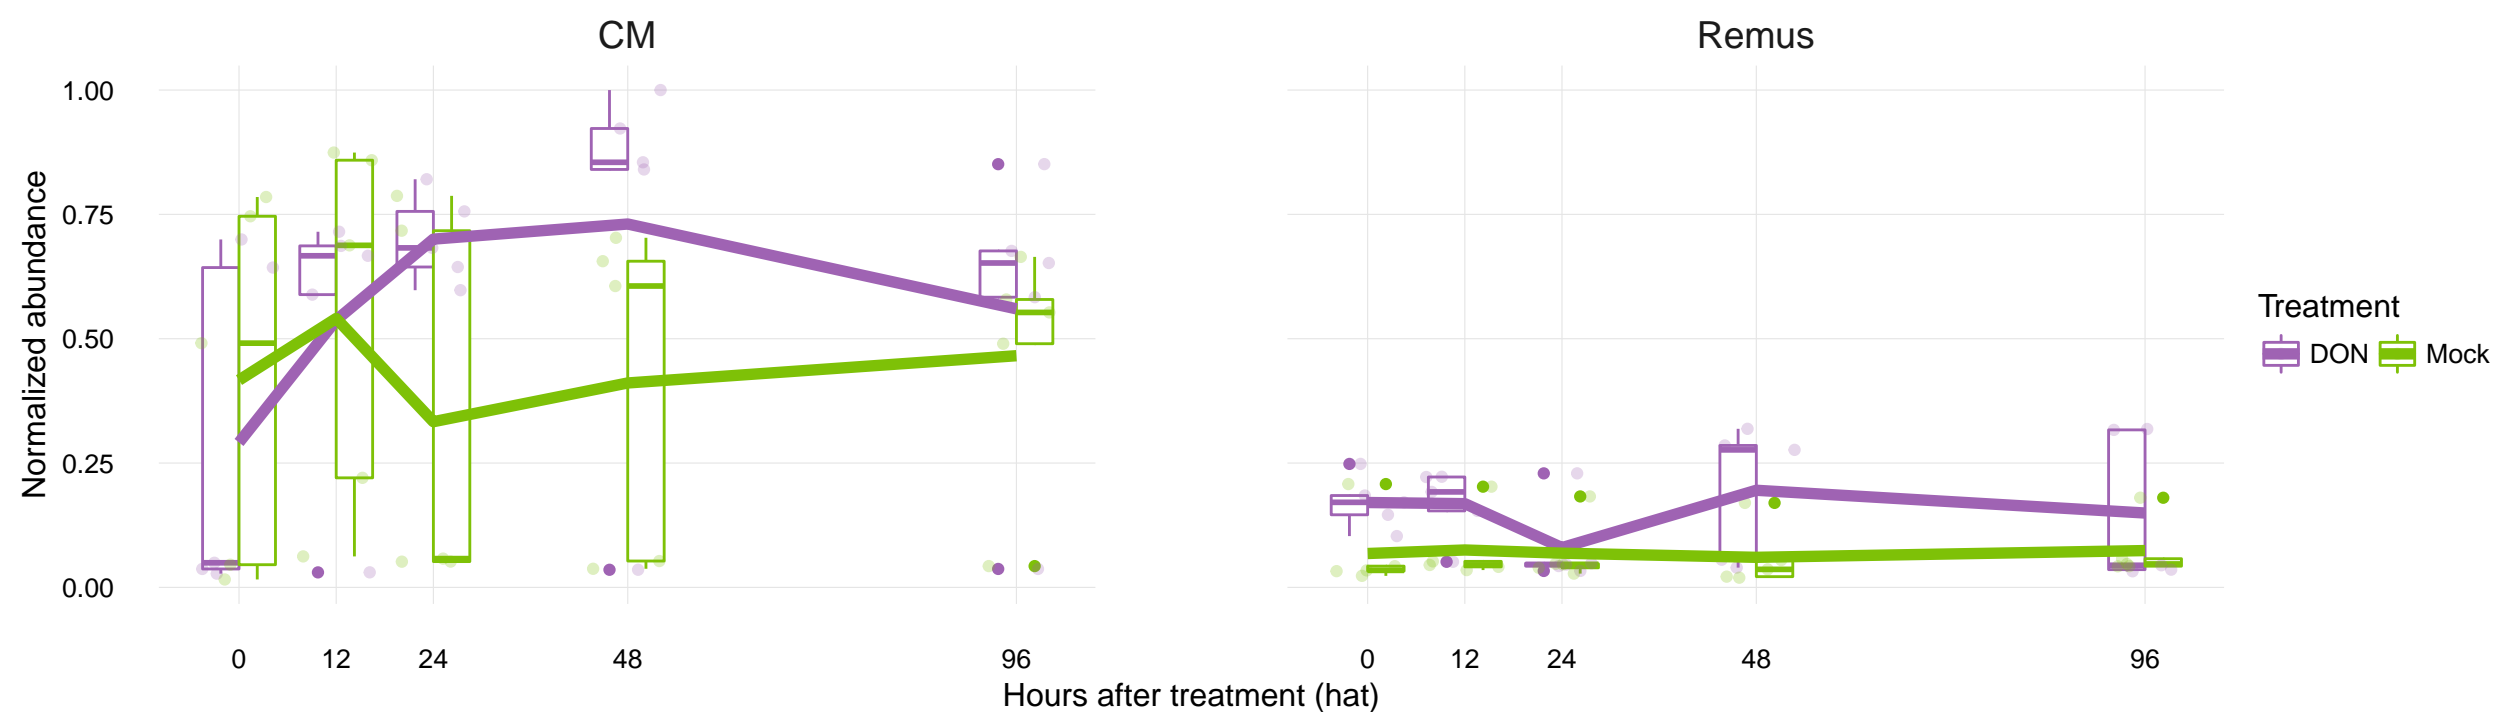

## DON, Mock; all four genotypes

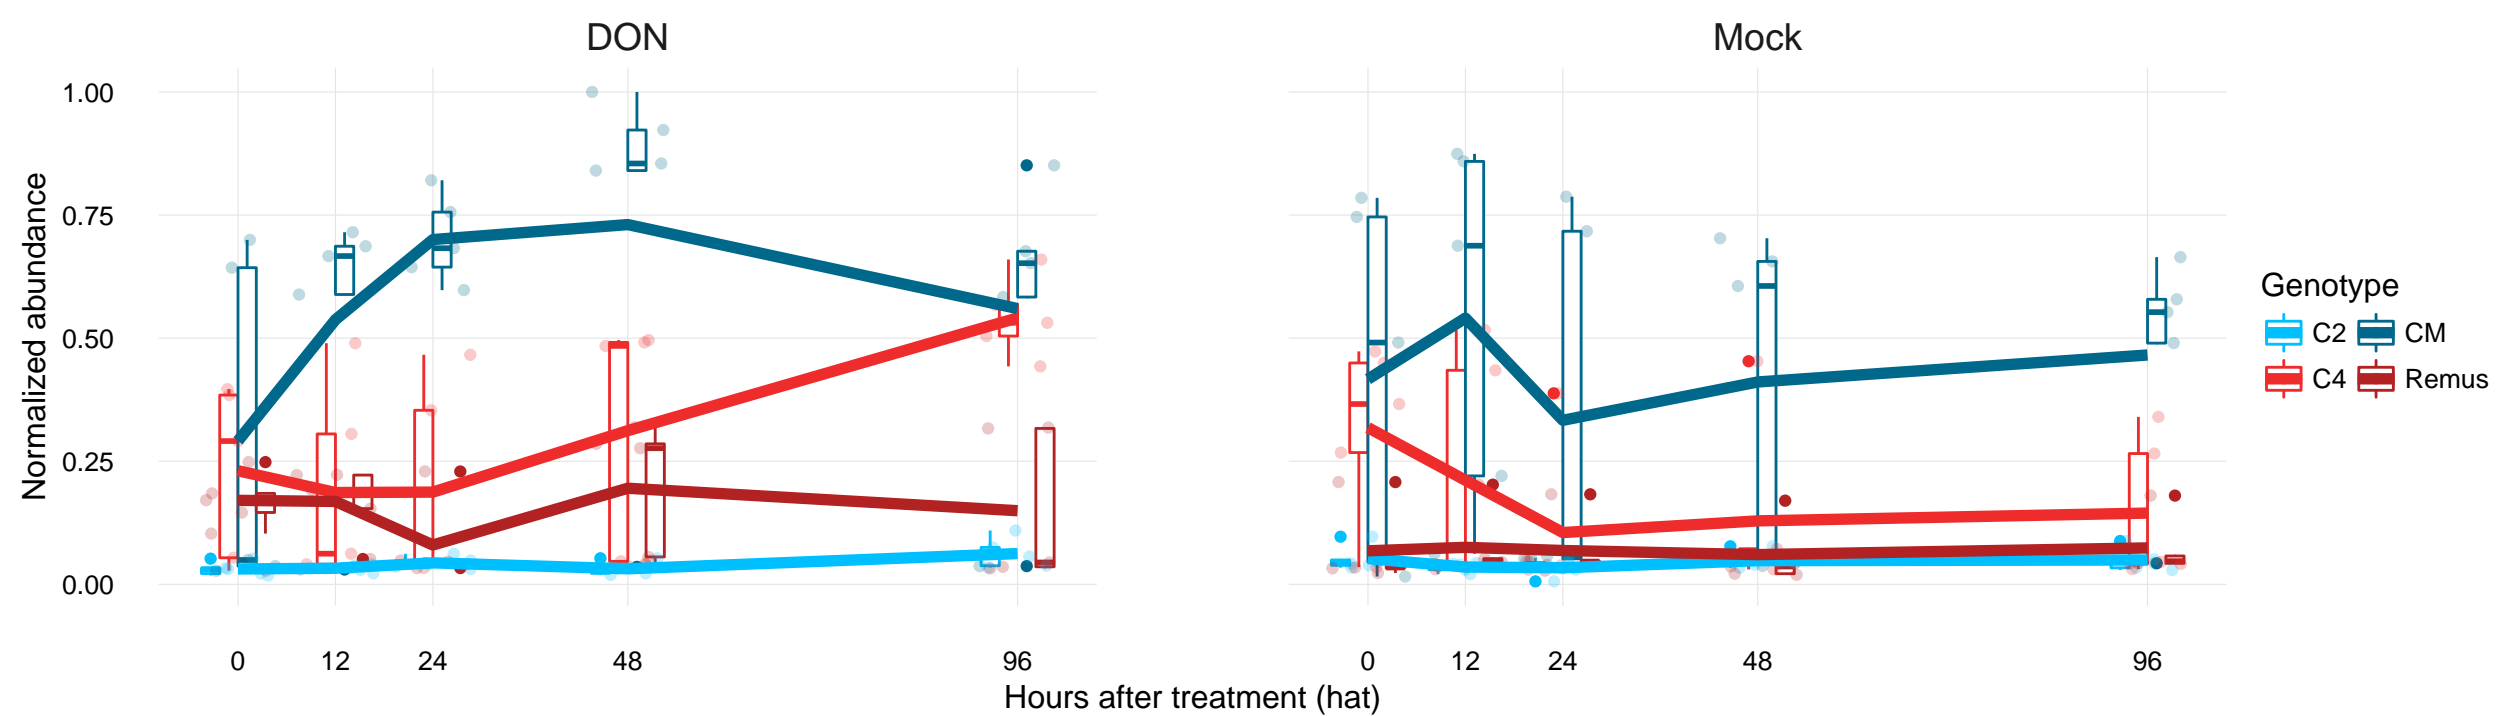

# A.104

Annotated as Flavonoid (diGlcF)  
(3 database hits)

|                |                                                |
|----------------|------------------------------------------------|
| MZ             | 565.1915                                       |
| RT             | 17.01 min                                      |
| Normalization  | Indirectly via surrogate<br>in the KPX samples |
| Cluster        | Cluster 2                                      |
| Cn total / Phe | 27 / 9                                         |

## C2, C4; different treatments

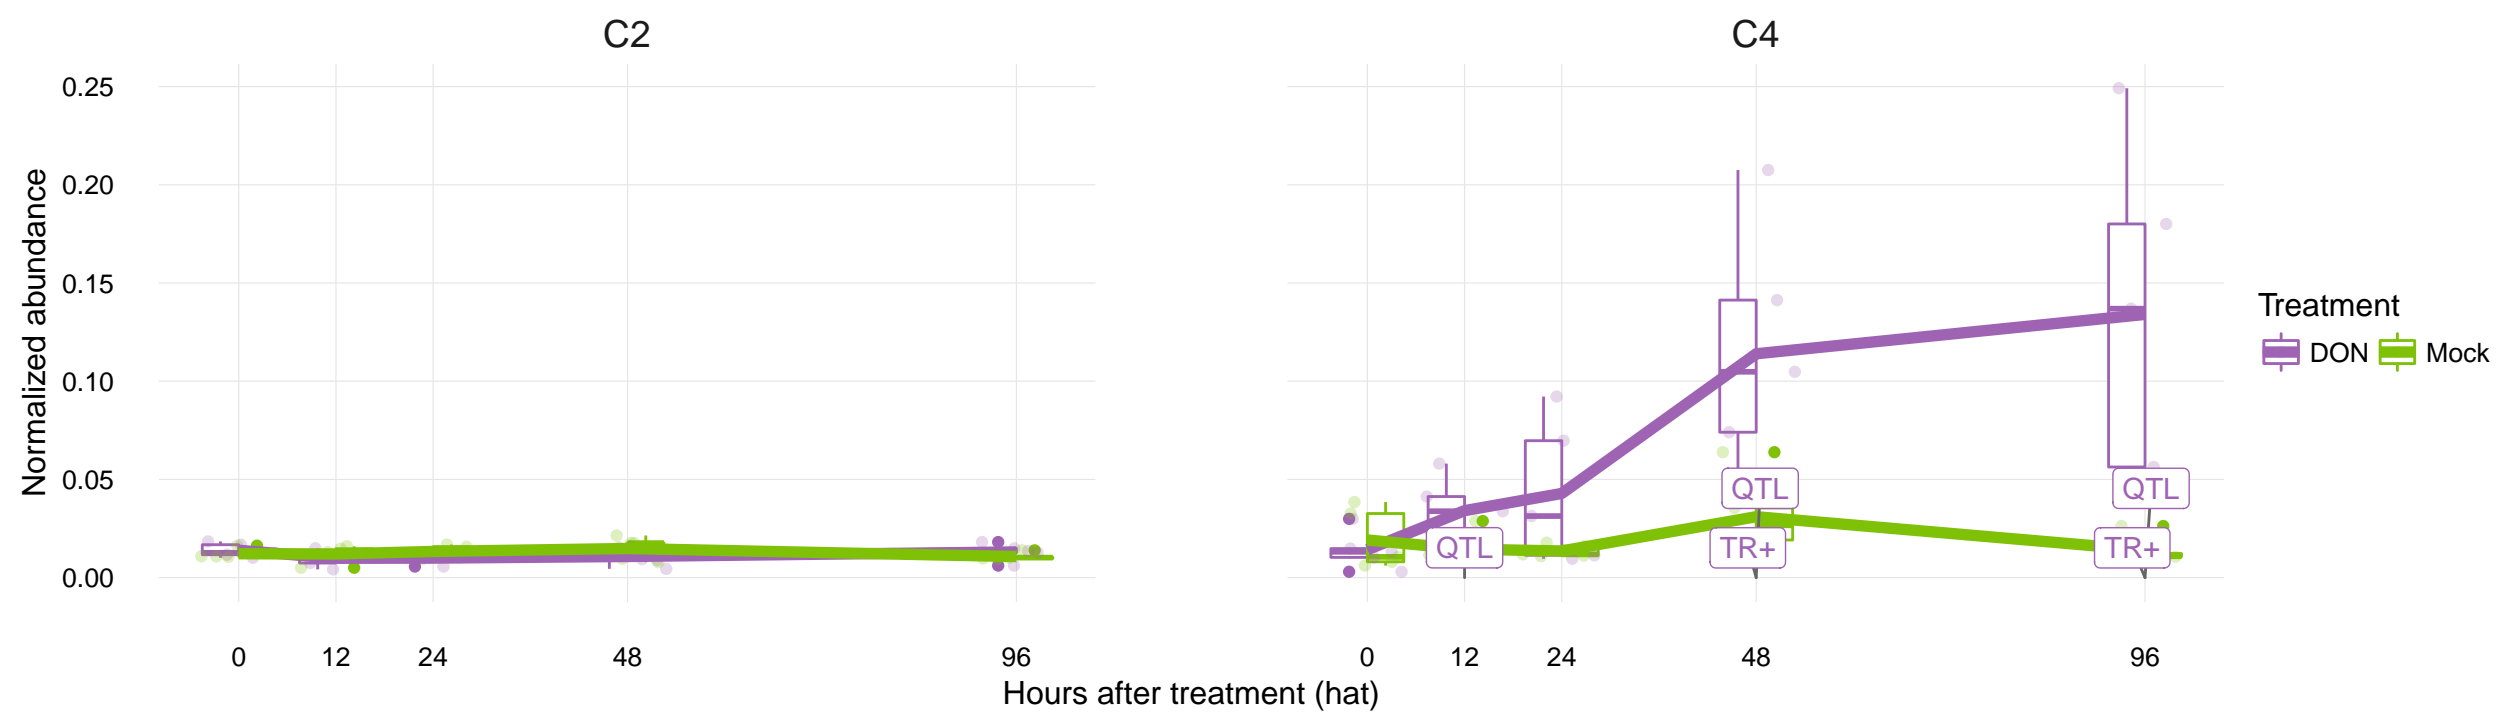

## DON, Mock; different genotypes

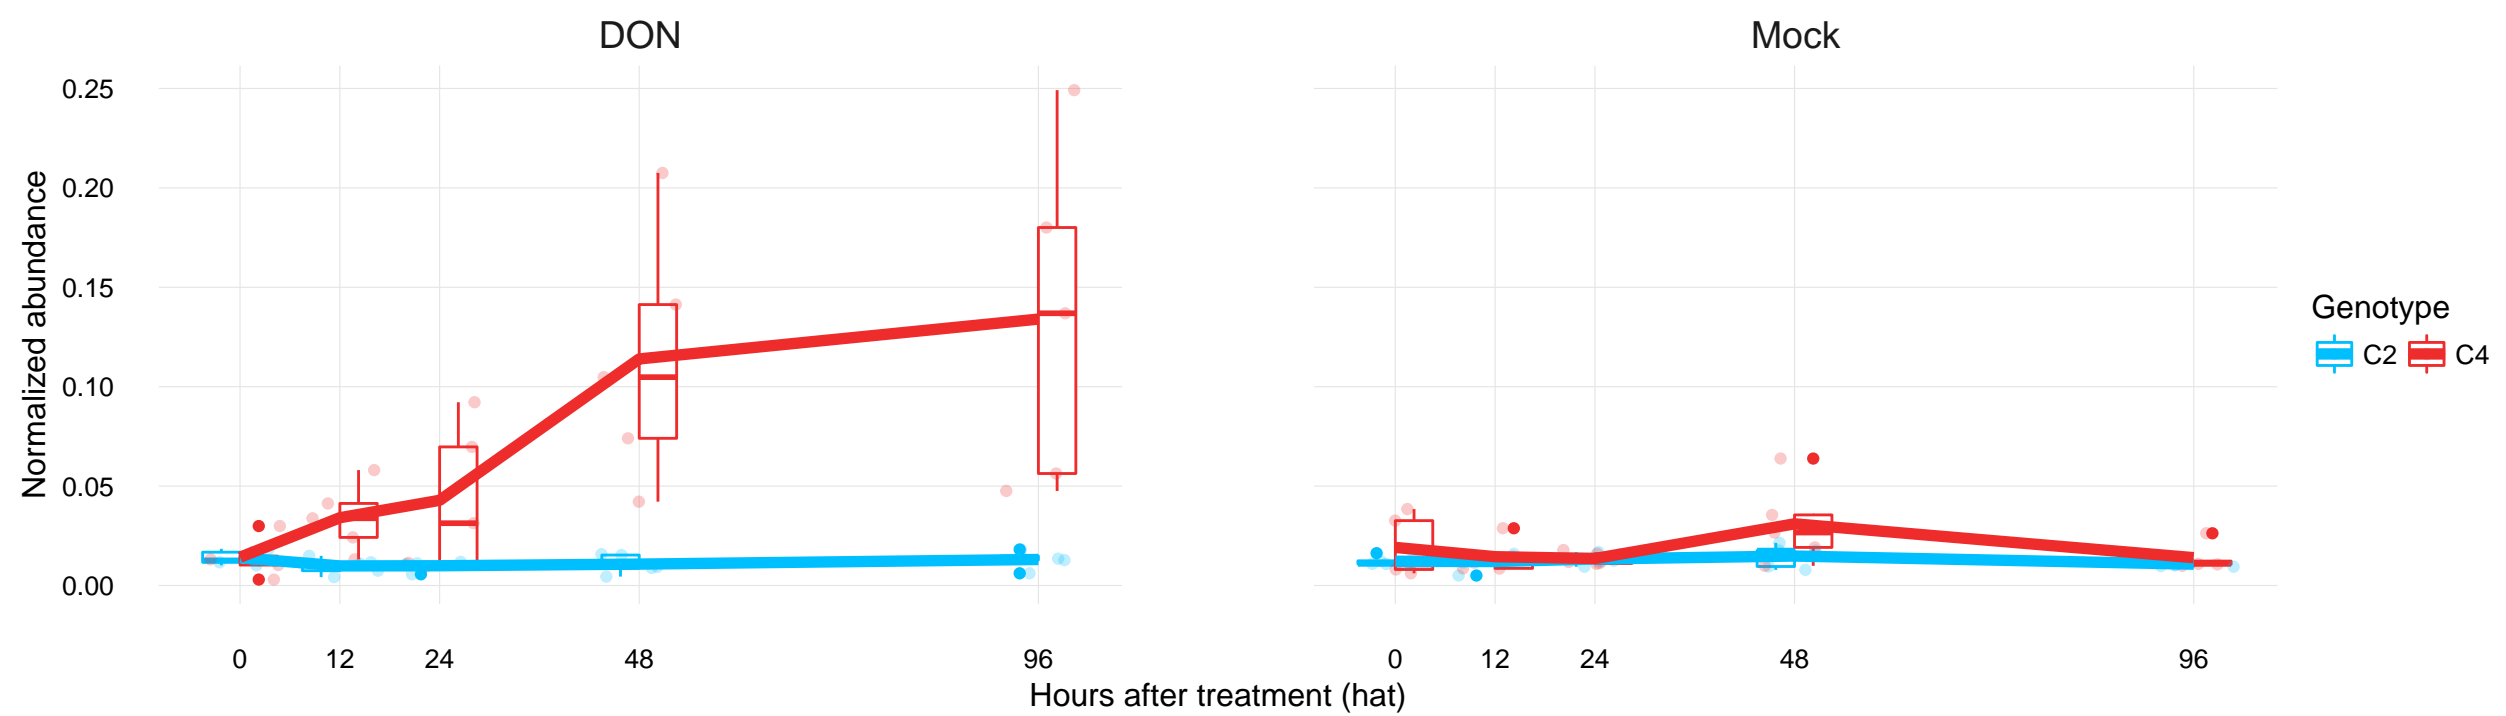

## CM, Remus; different treatments

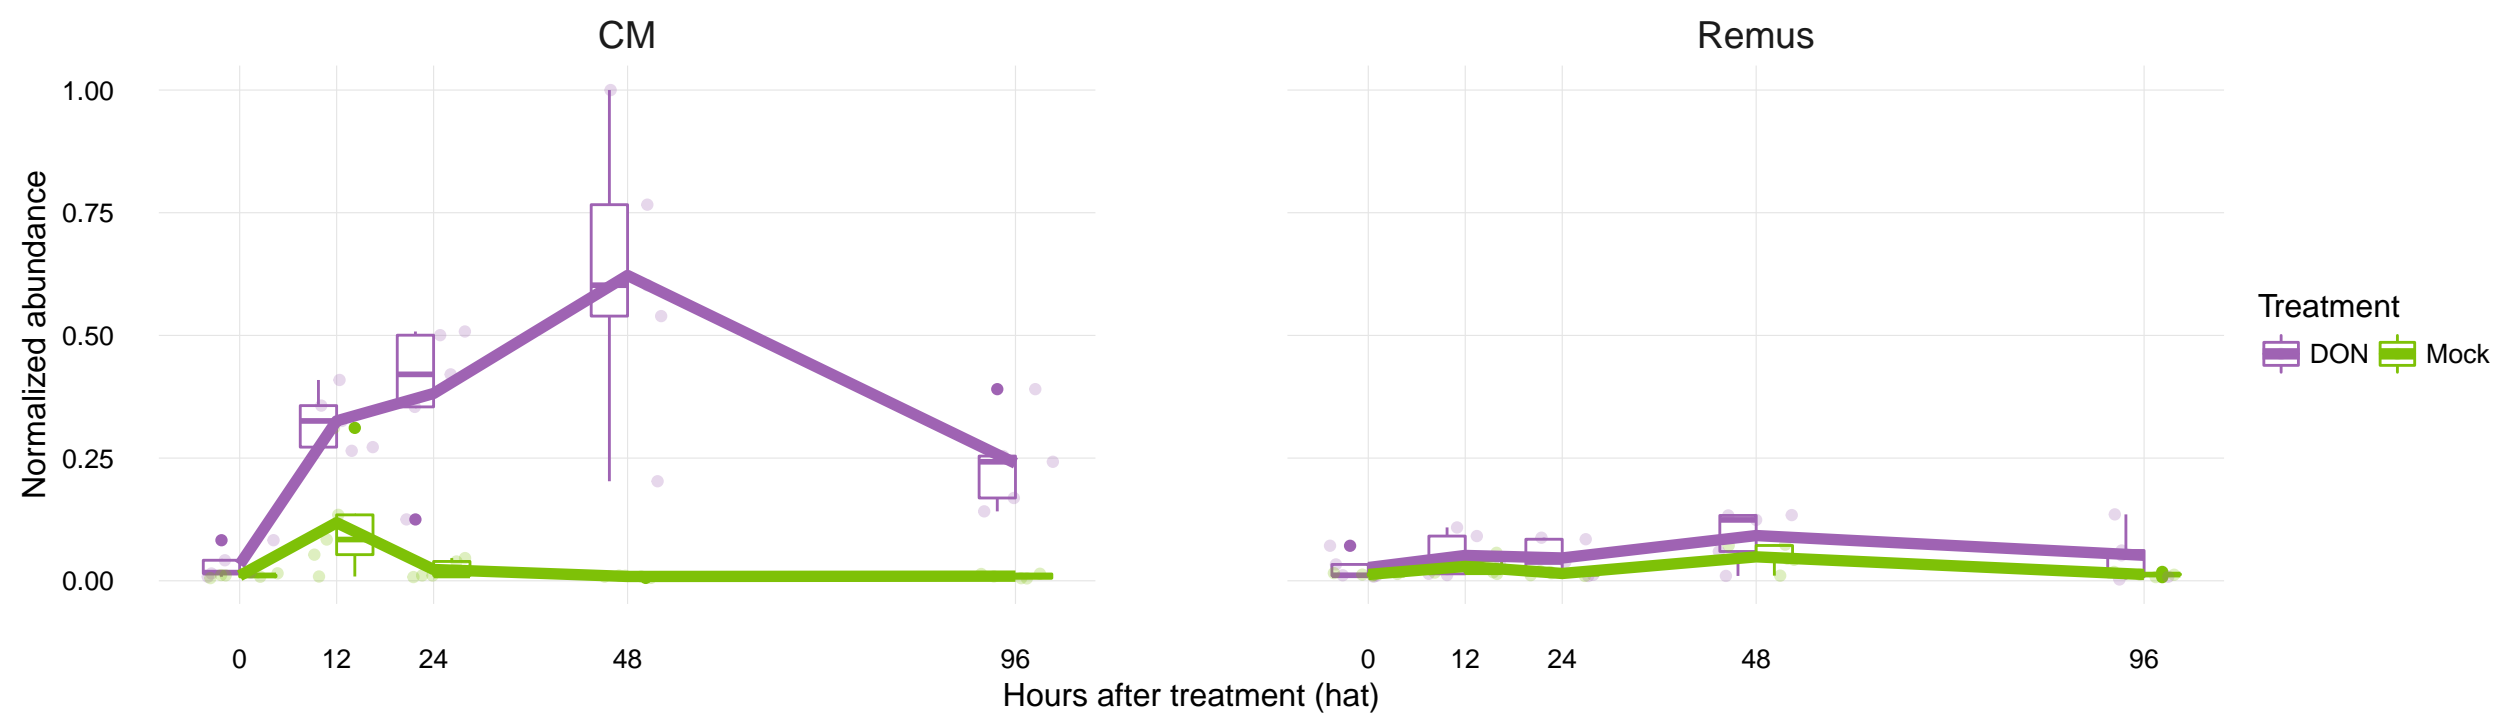

## DON, Mock; all four genotypes

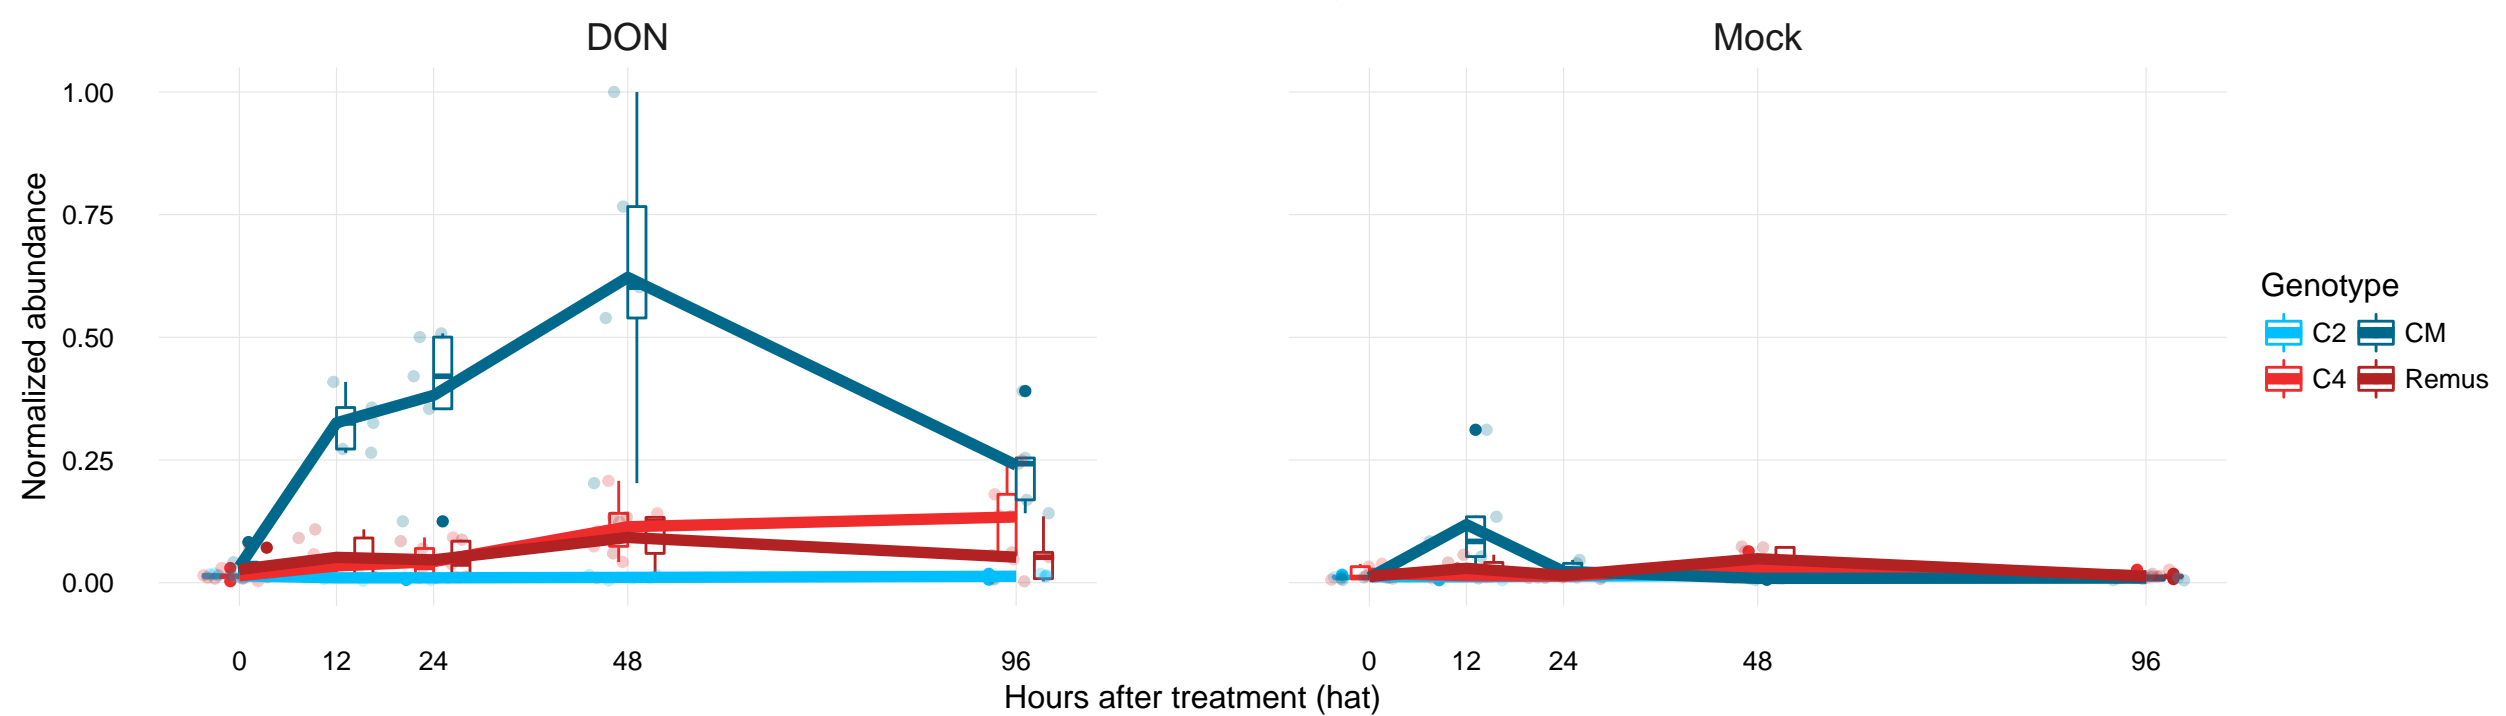

# A.36

Annotated as HCA derivative  
(1 database hit)

|                |                                                |
|----------------|------------------------------------------------|
| MZ             | 357.1183                                       |
| RT             | 10.27 min                                      |
| Normalization  | Indirectly via surrogate<br>in the KPX samples |
| Cluster        | Cluster 2                                      |
| Cn total / Phe | 16 / 9                                         |

## C2, C4; different treatments

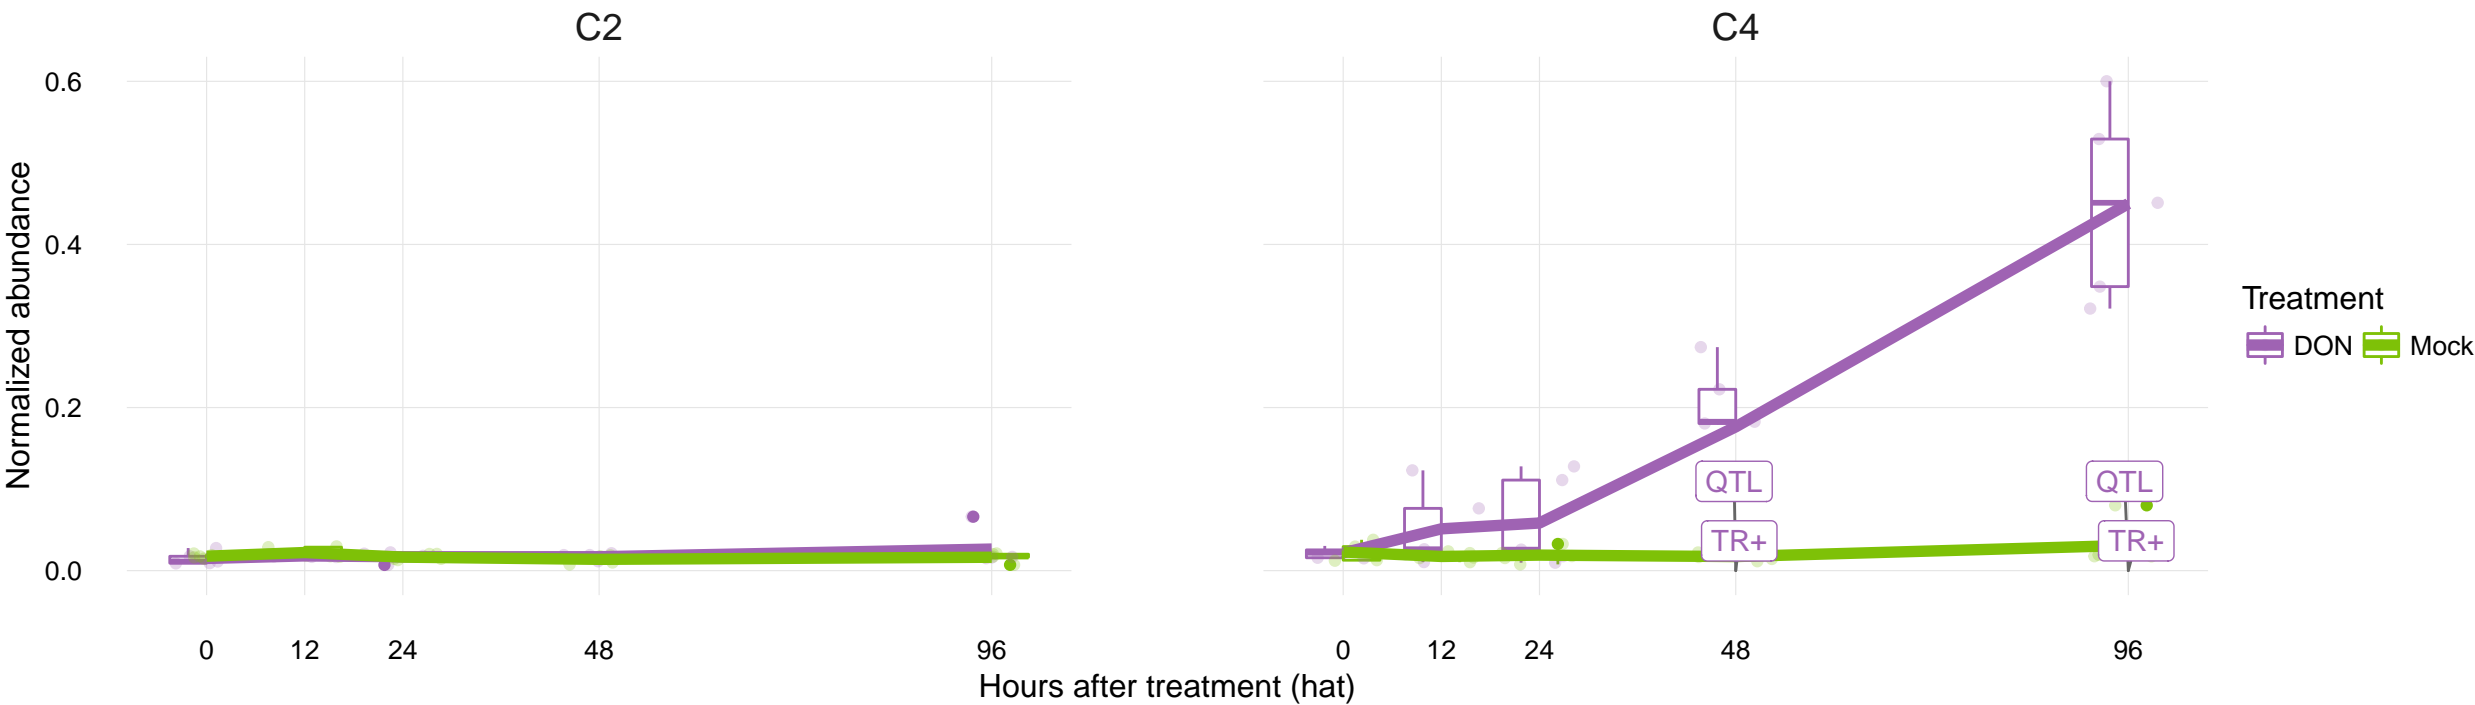

## DON, Mock; different genotypes

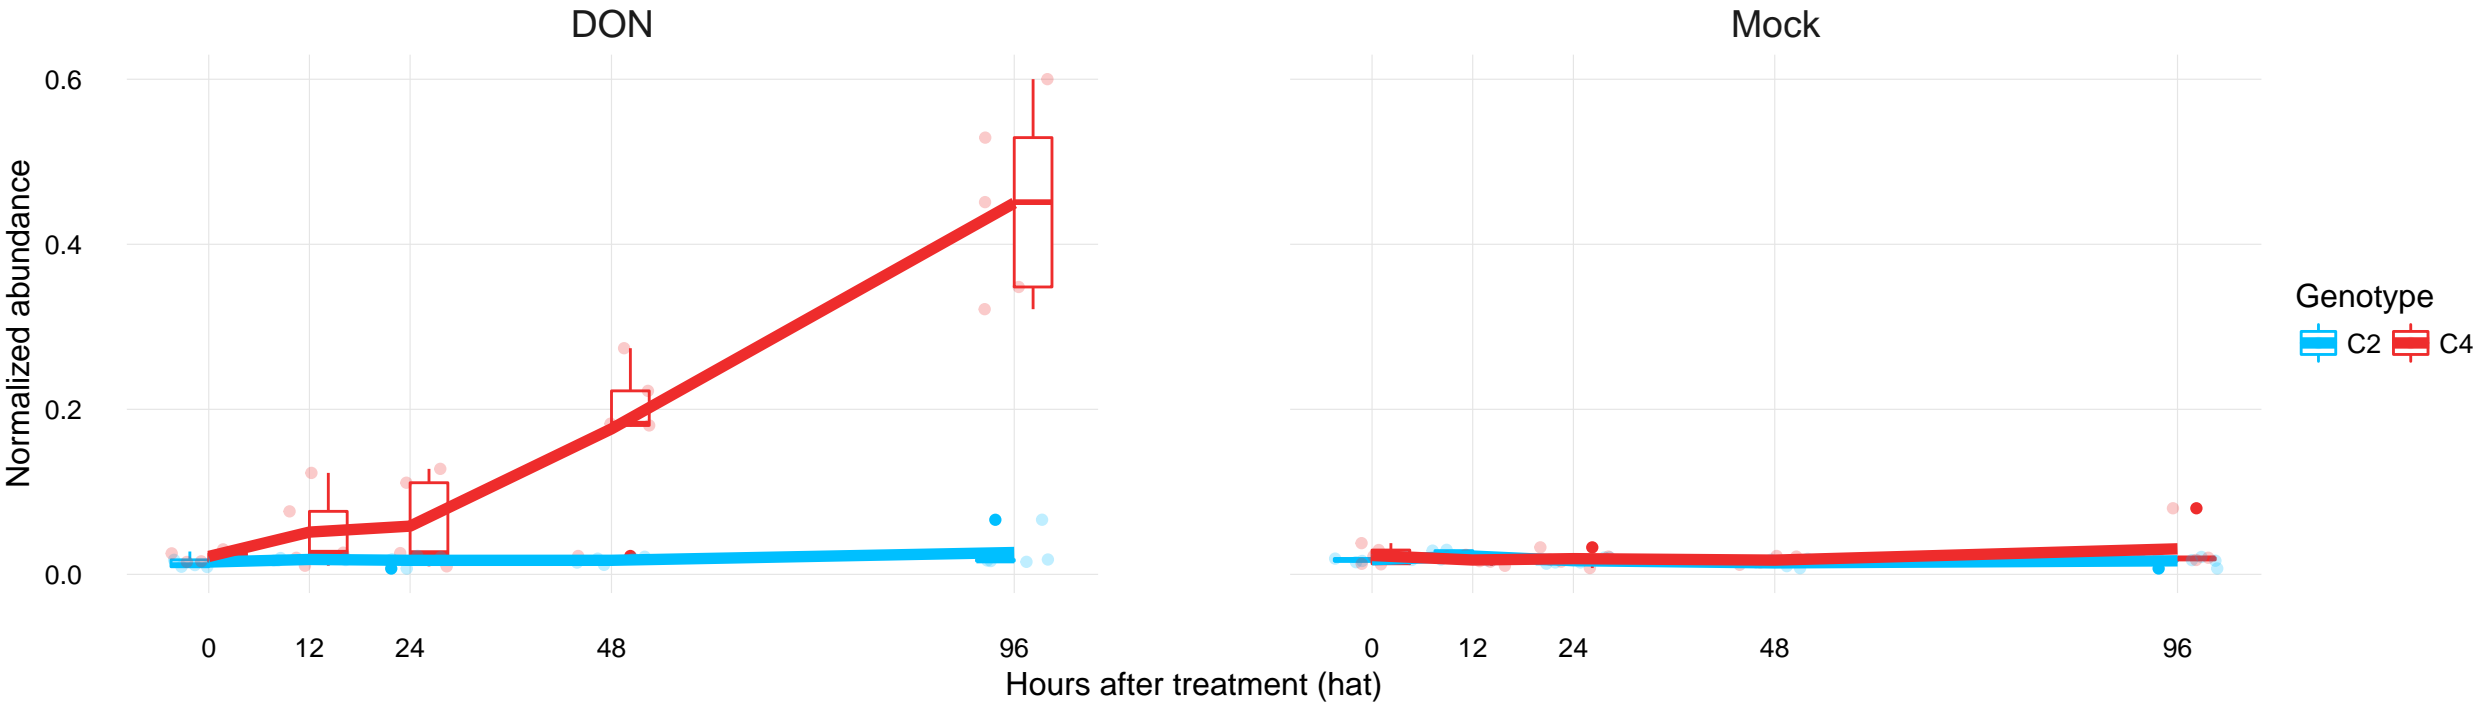

## CM, Remus; different treatments

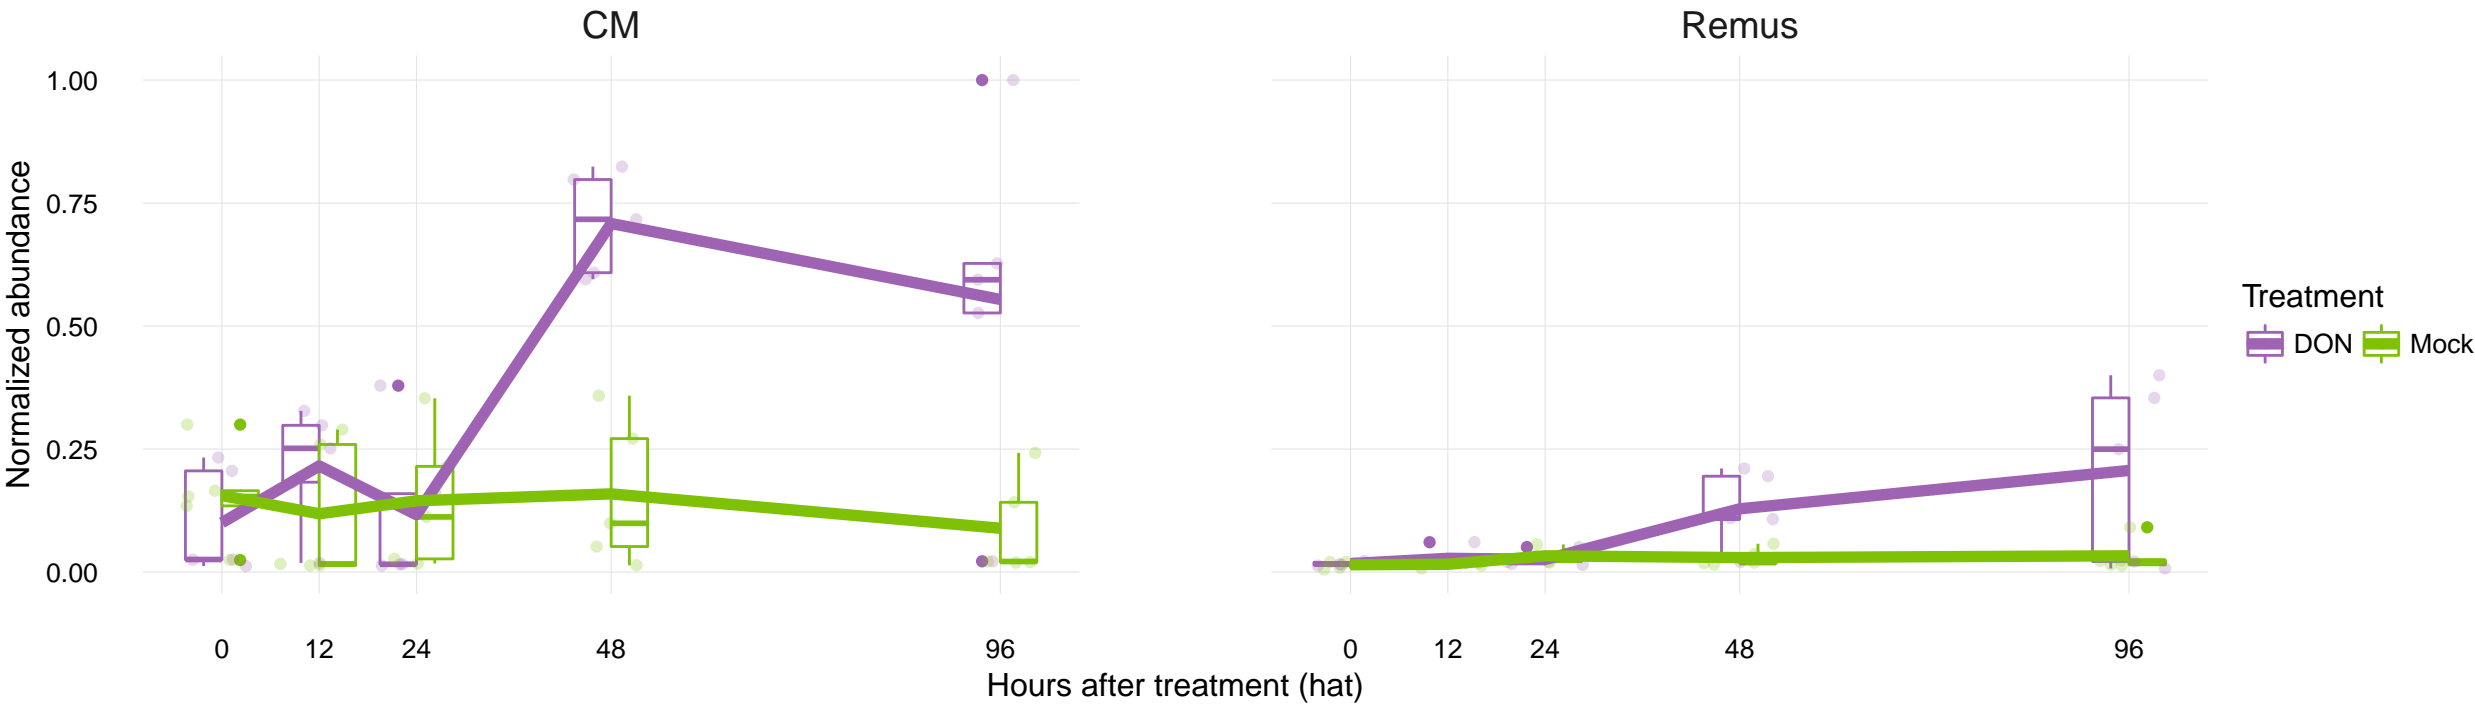

## DON, Mock; all four genotypes

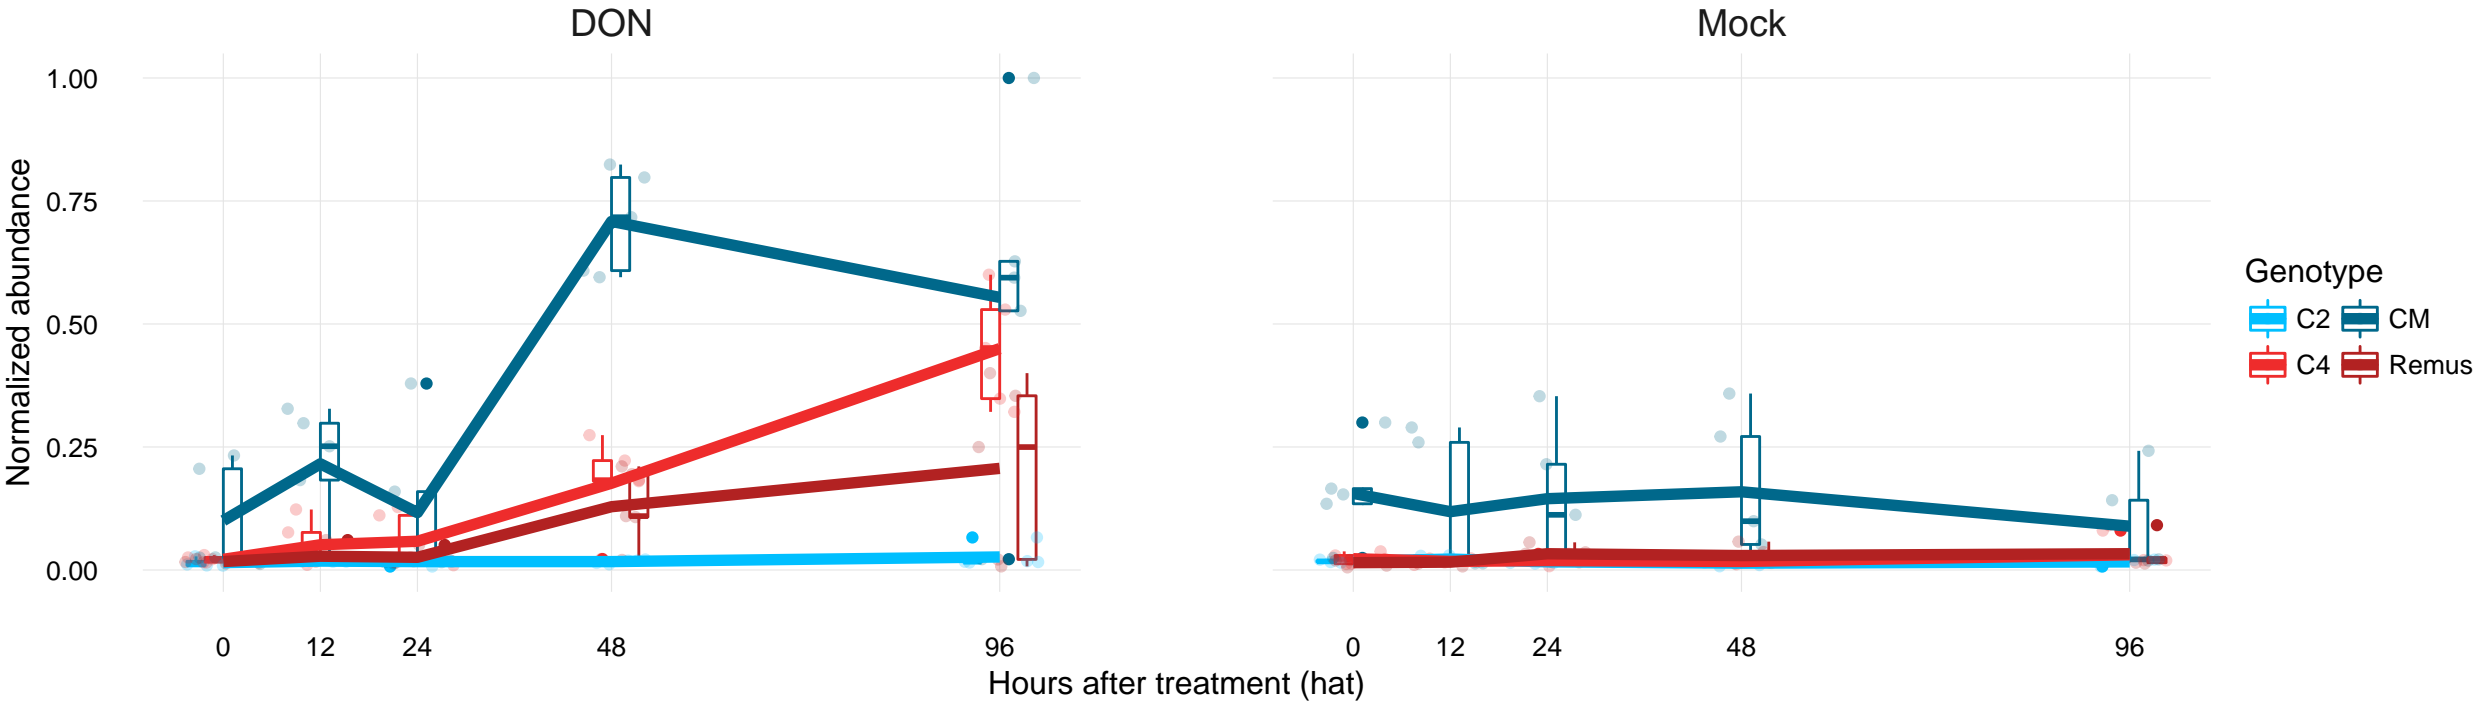



# A.31

Annotated as HCA derivative  
(3 database hits)

|                |                                                |
|----------------|------------------------------------------------|
| MZ             | 165.0549                                       |
| RT             | 9.6 min                                        |
| Normalization  | Indirectly via surrogate<br>in the KPX samples |
| Cluster        | Cluster 2                                      |
| Cn total / Phe | 9 / 9                                          |

## C2, C4; different treatments

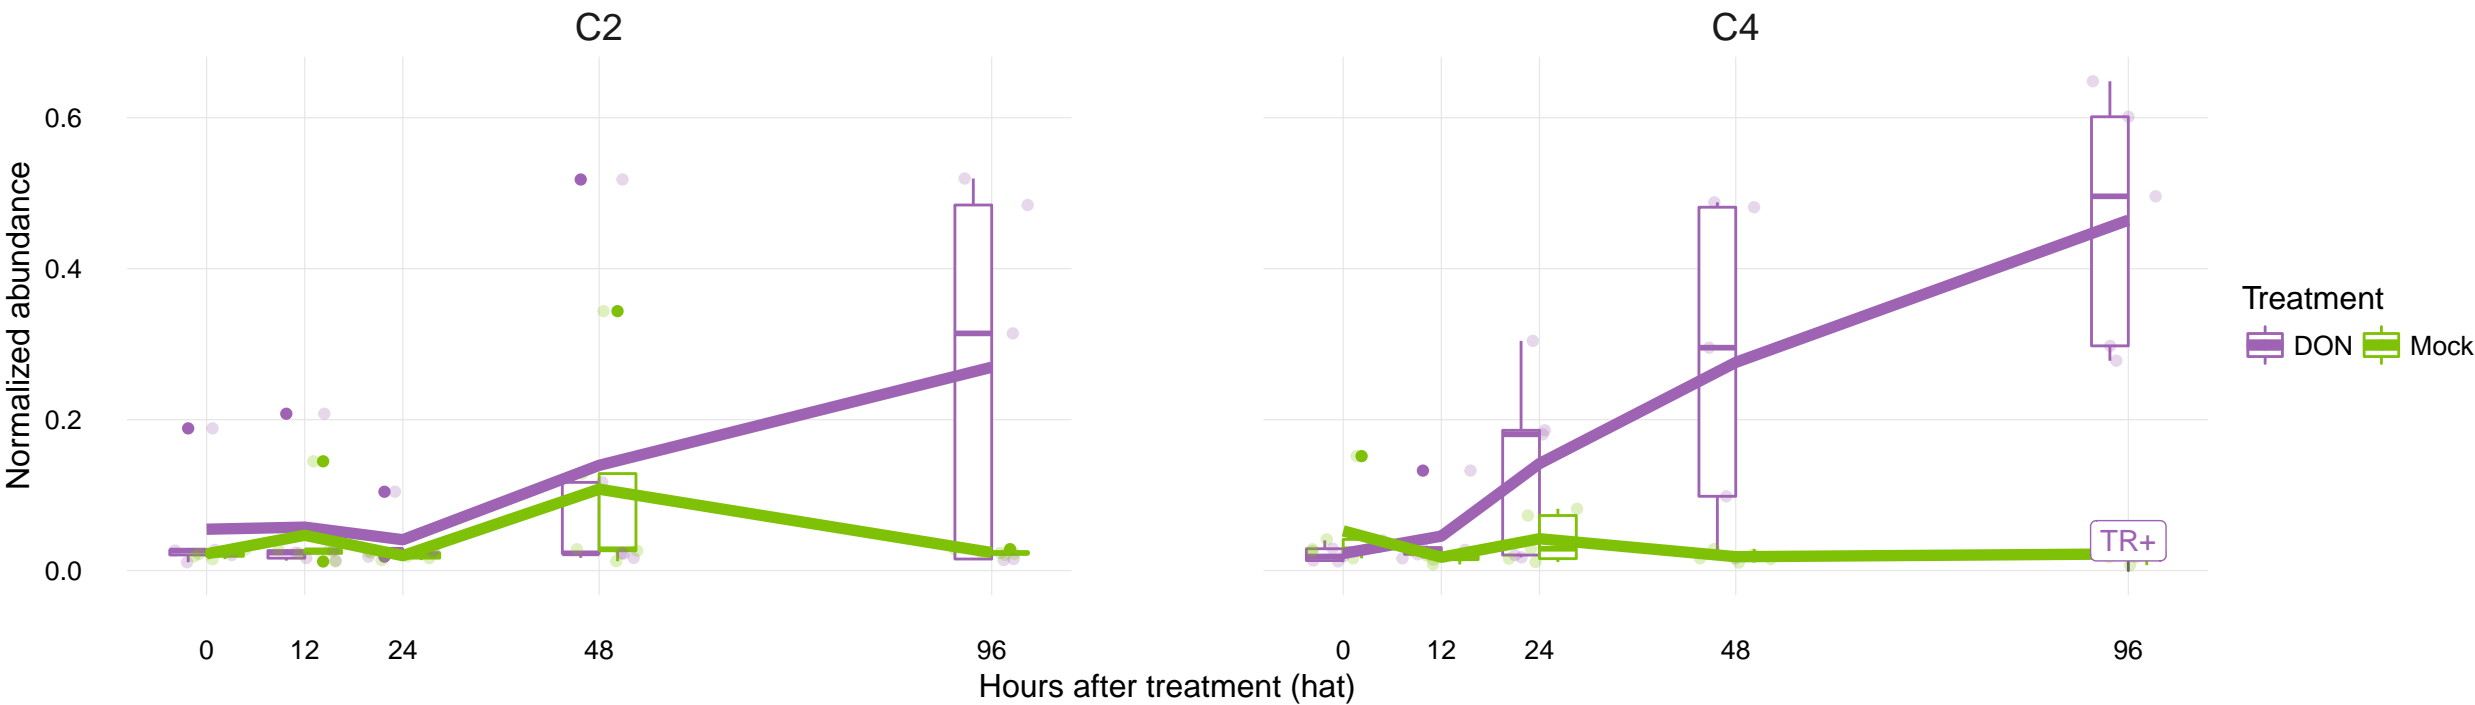

## DON, Mock; different genotypes

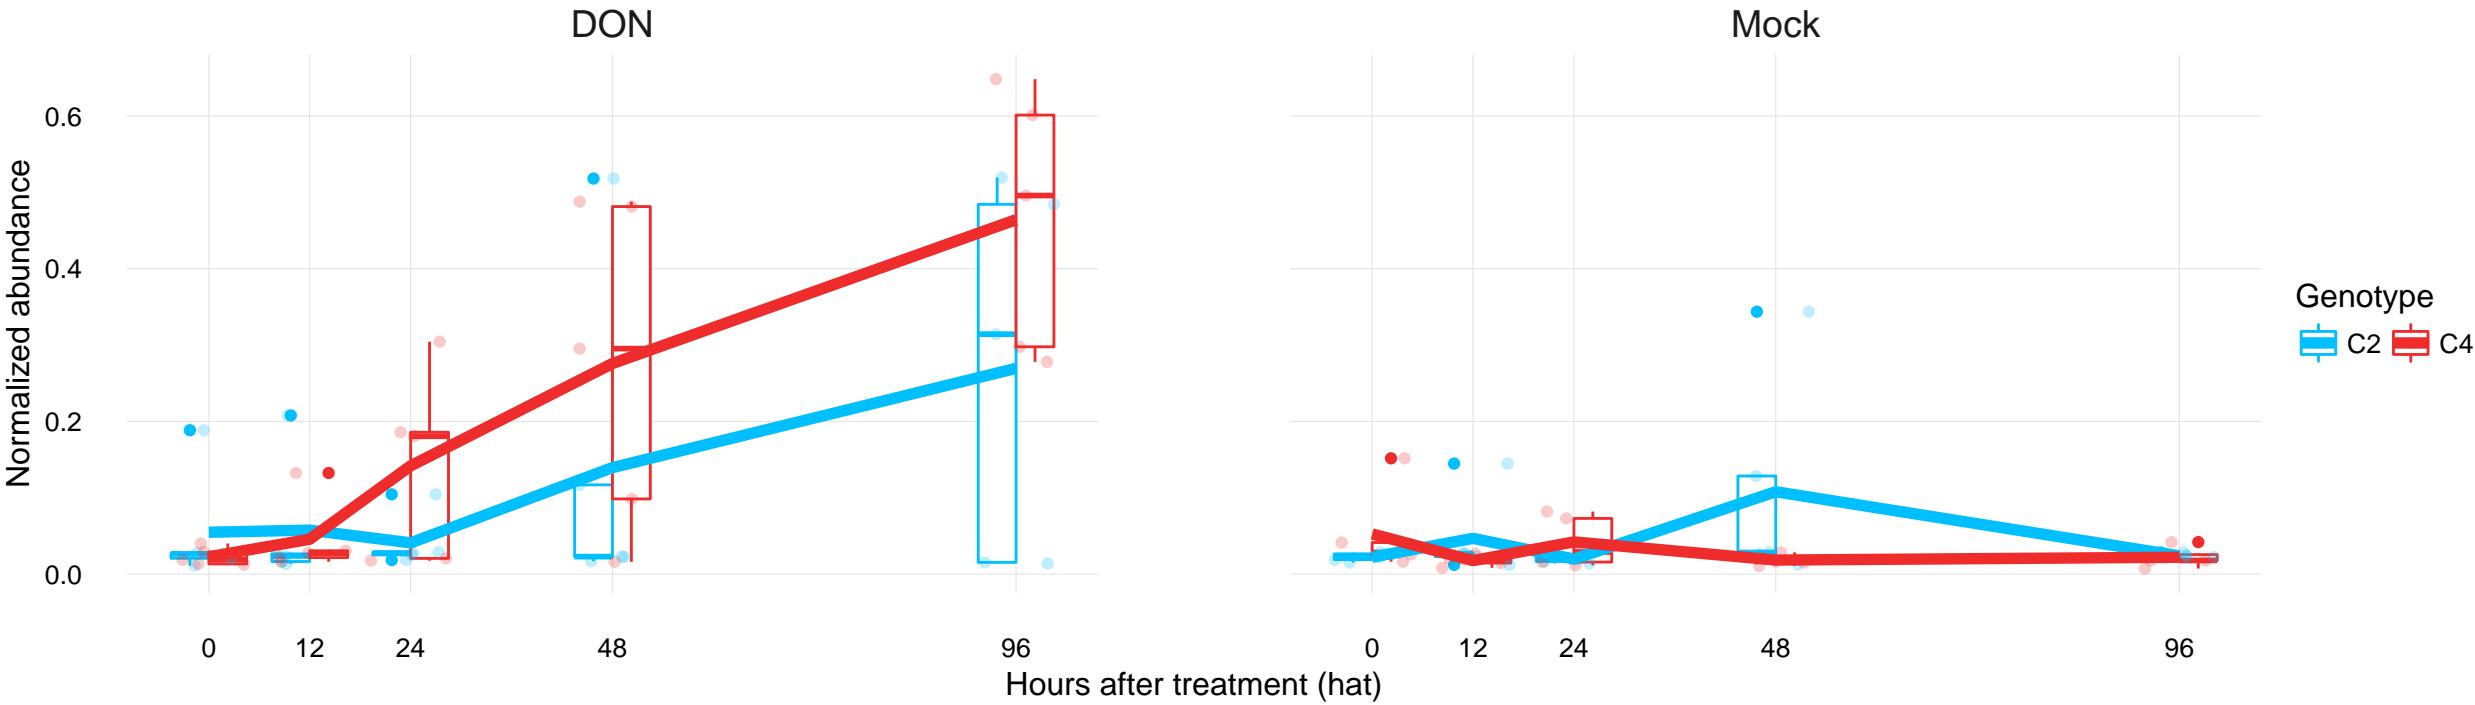

## CM, Remus; different treatments

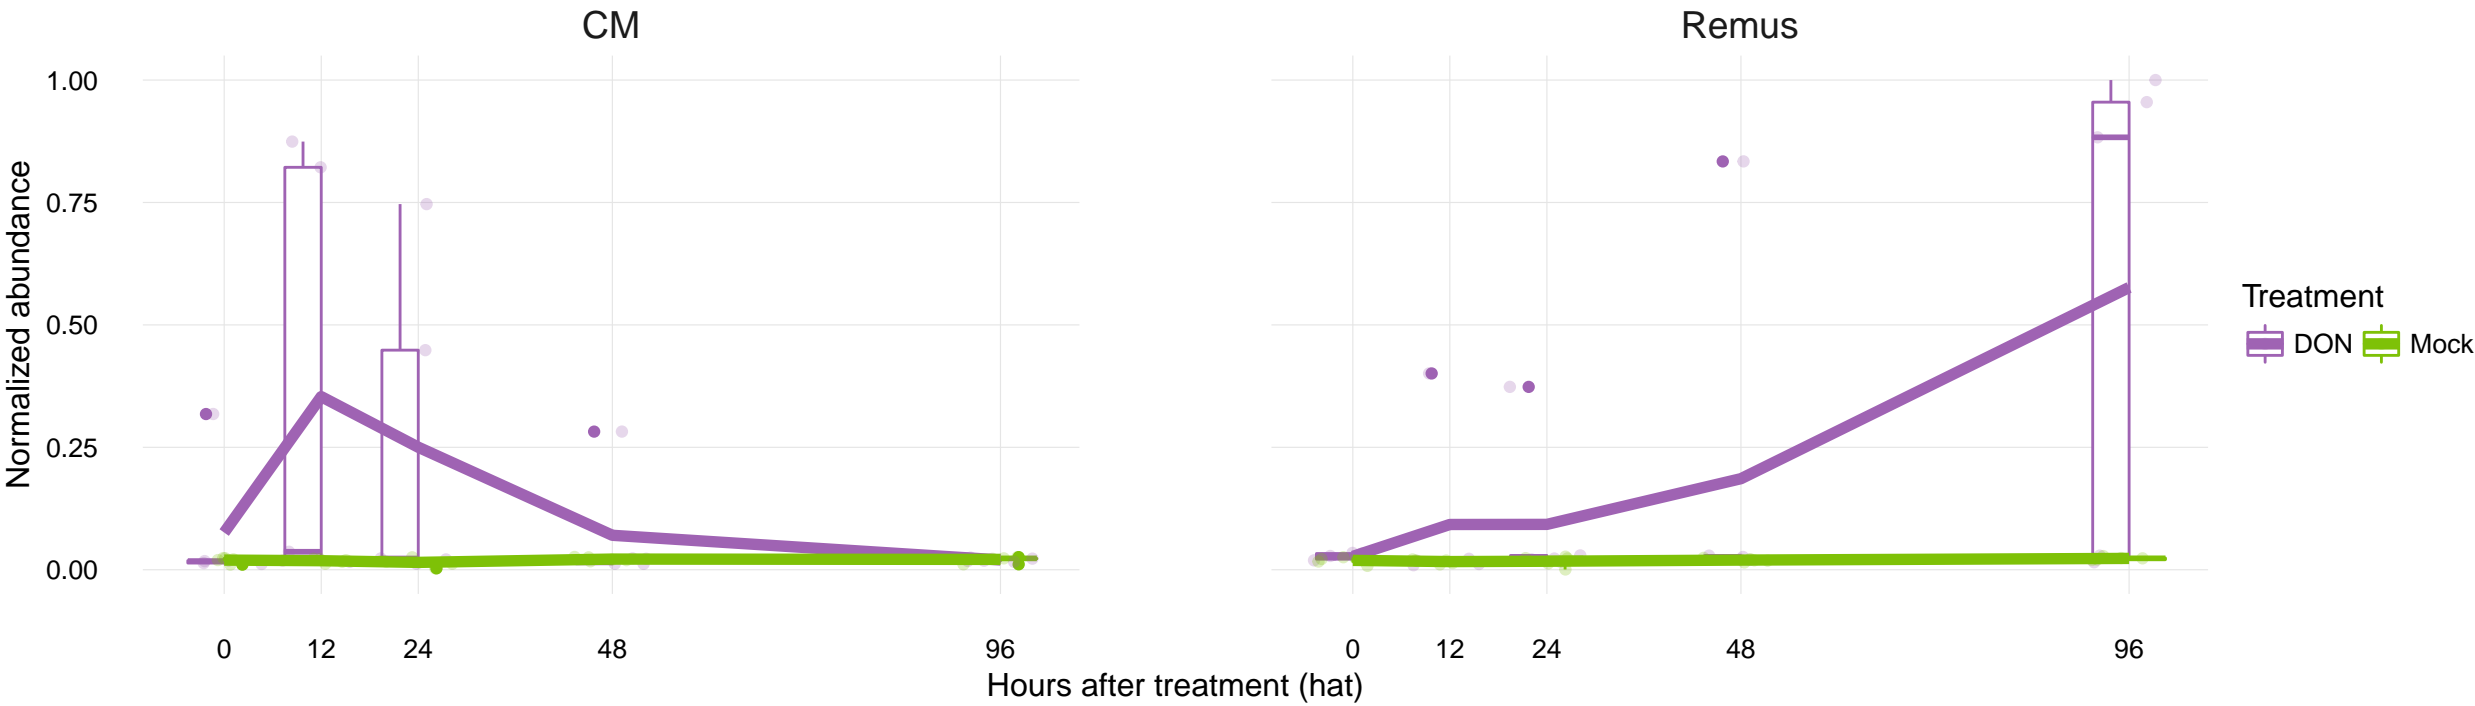

## DON, Mock; all four genotypes

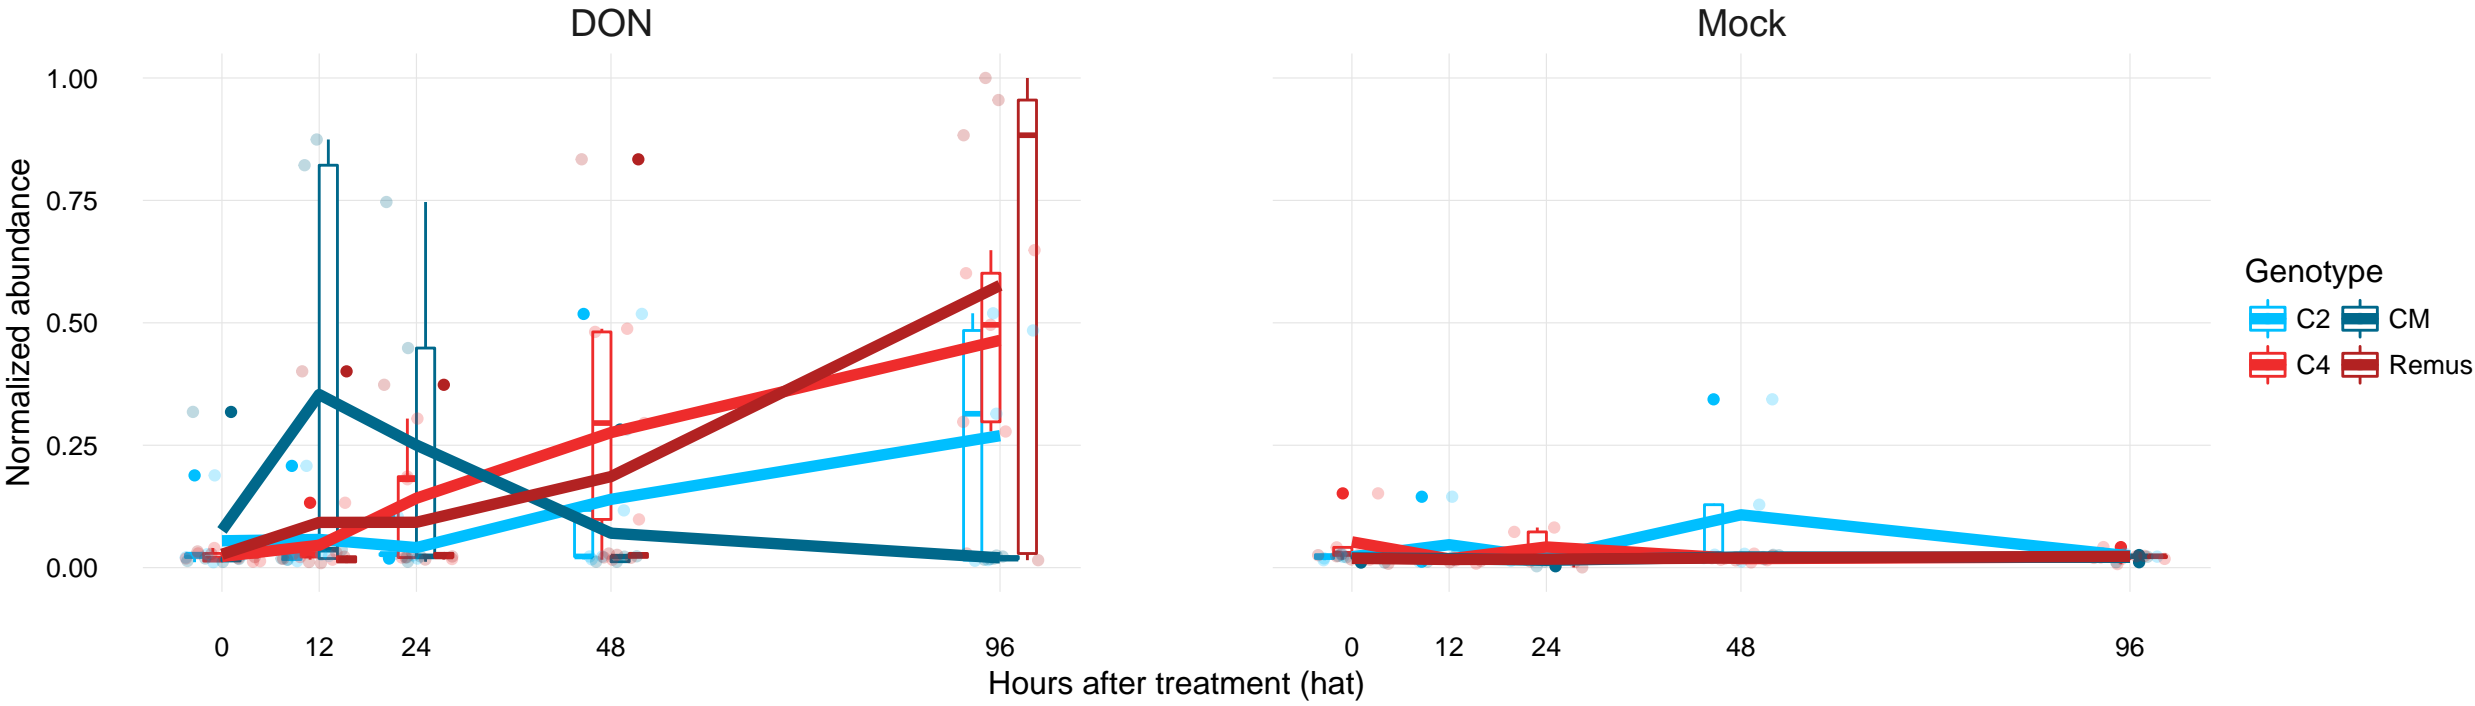

# A.13

Annotated as HCA derivative  
(1 database hit)

|                |                                                |
|----------------|------------------------------------------------|
| MZ             | 531.171                                        |
| RT             | 6.42 min                                       |
| Normalization  | Indirectly via surrogate<br>in the KPX samples |
| Cluster        | Cluster 2                                      |
| Cn total / Phe | 23 / 9                                         |

## C2, C4; different treatments

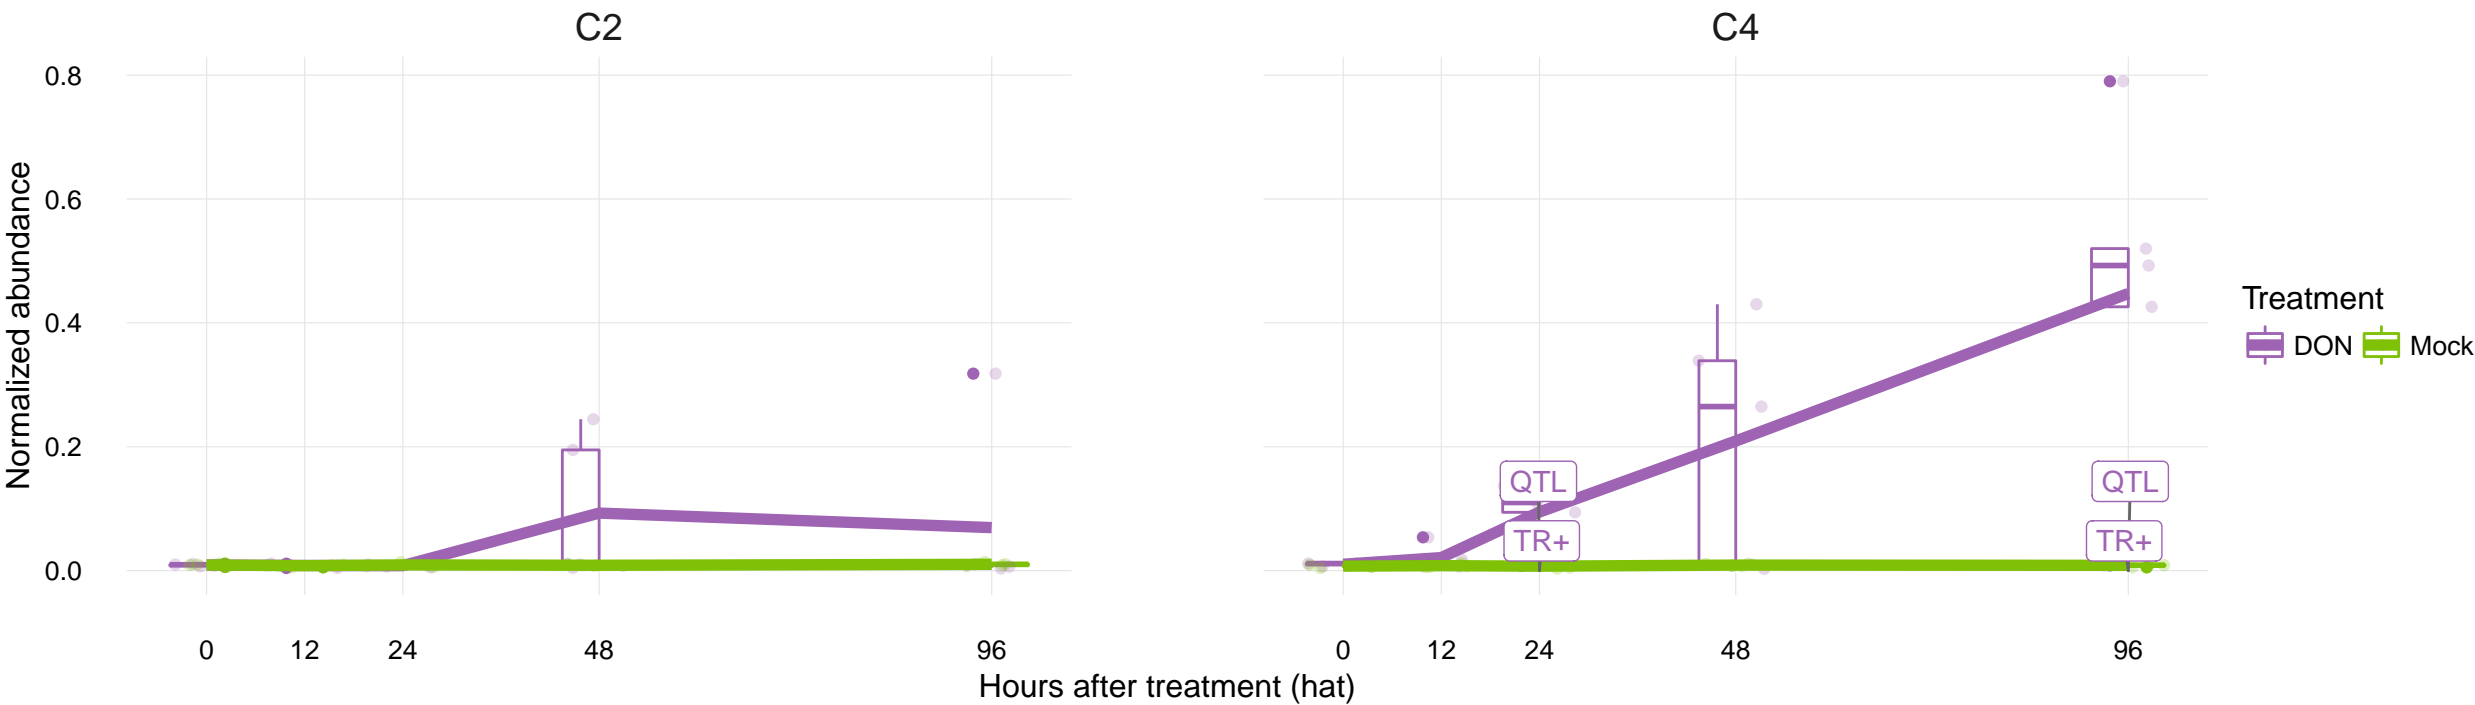

## DON, Mock; different genotypes

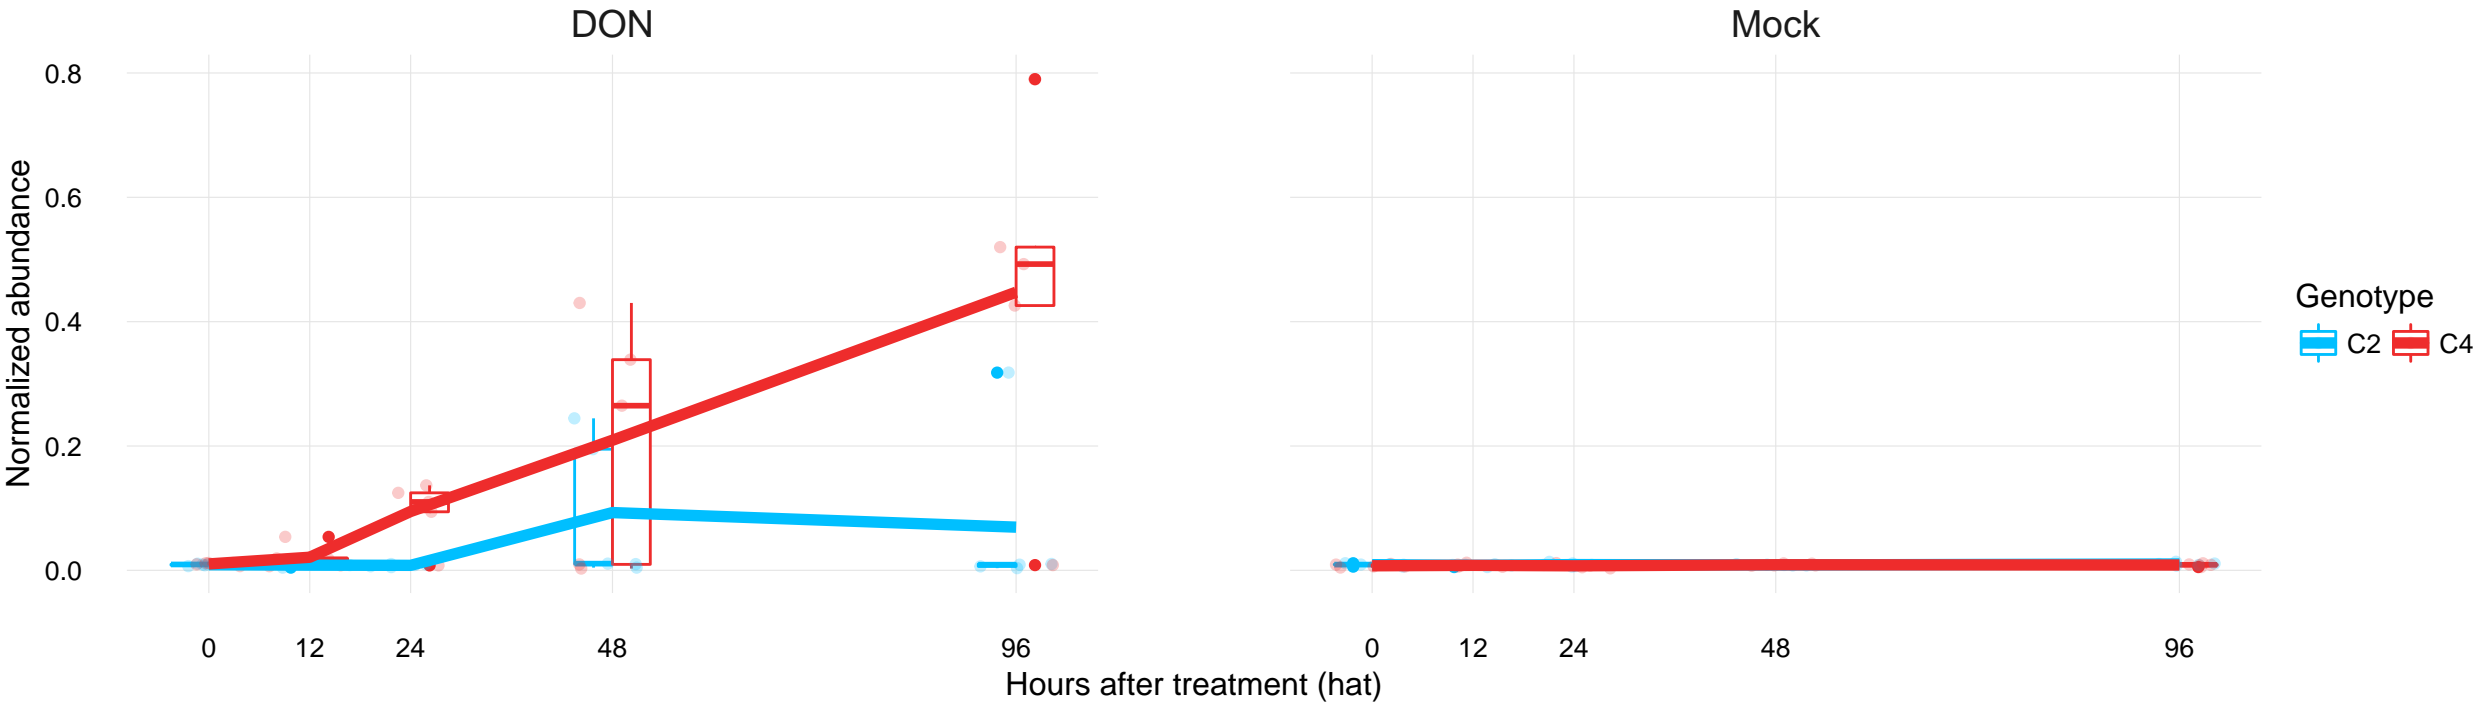

## CM, Remus; different treatments

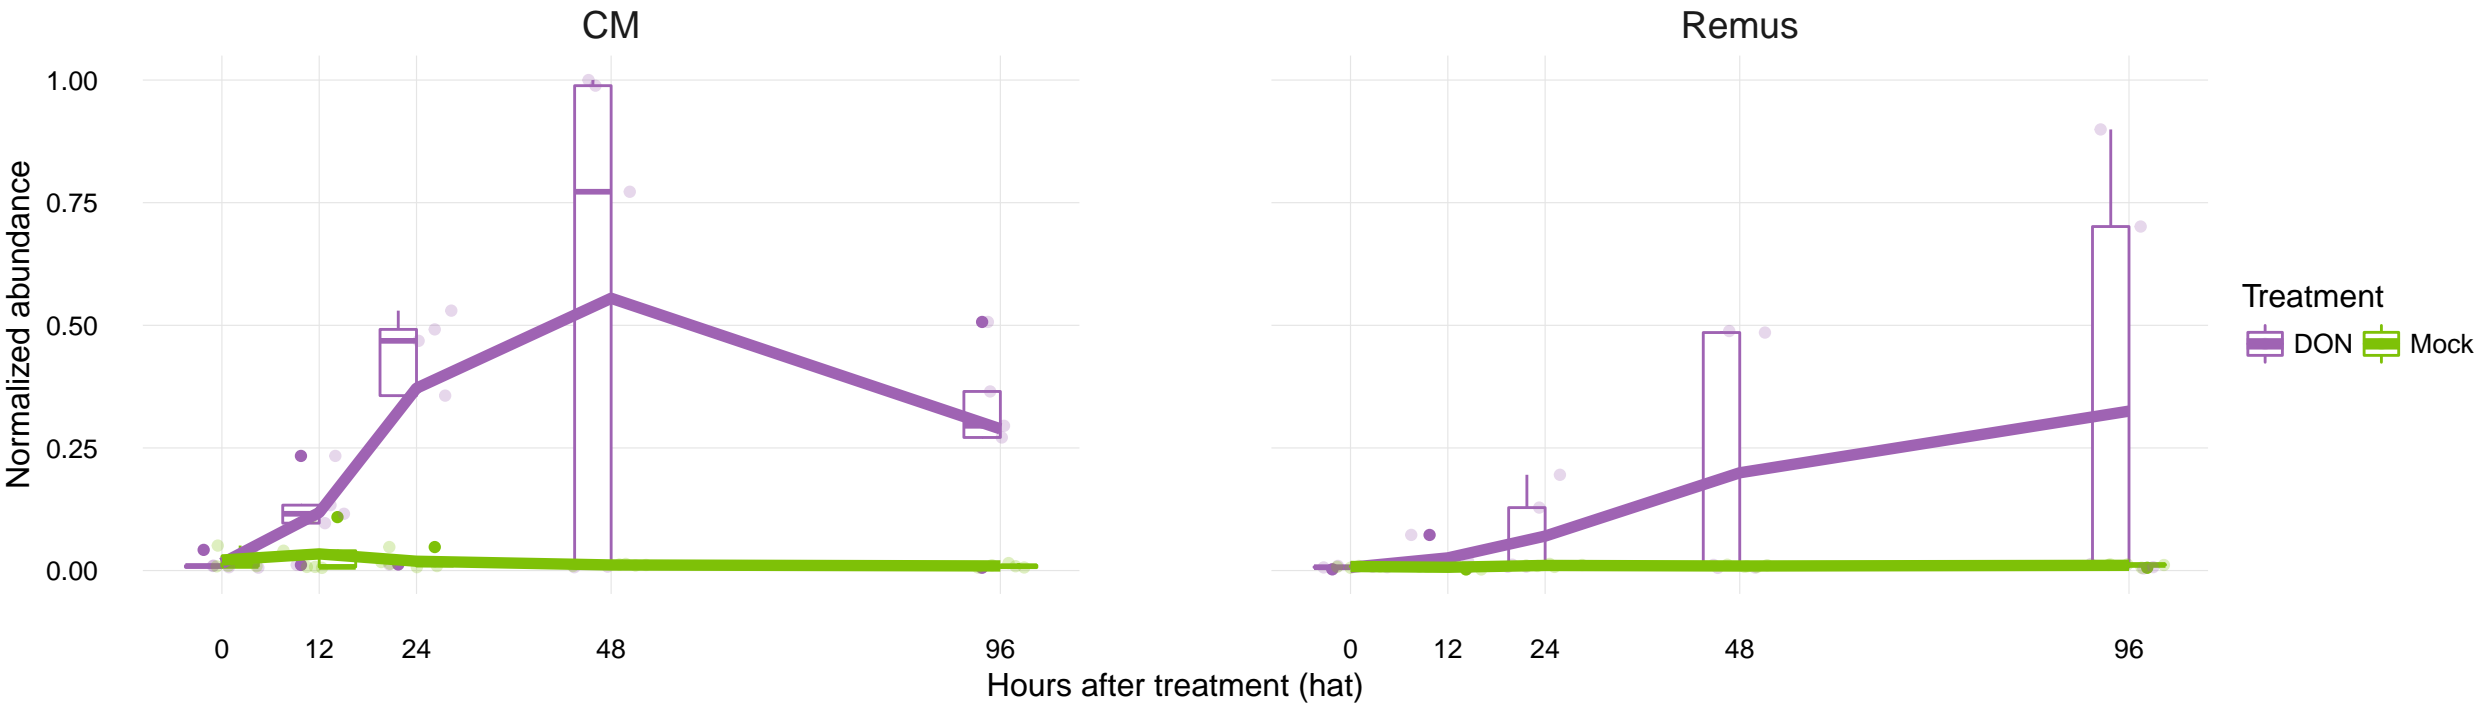

## DON, Mock; all four genotypes

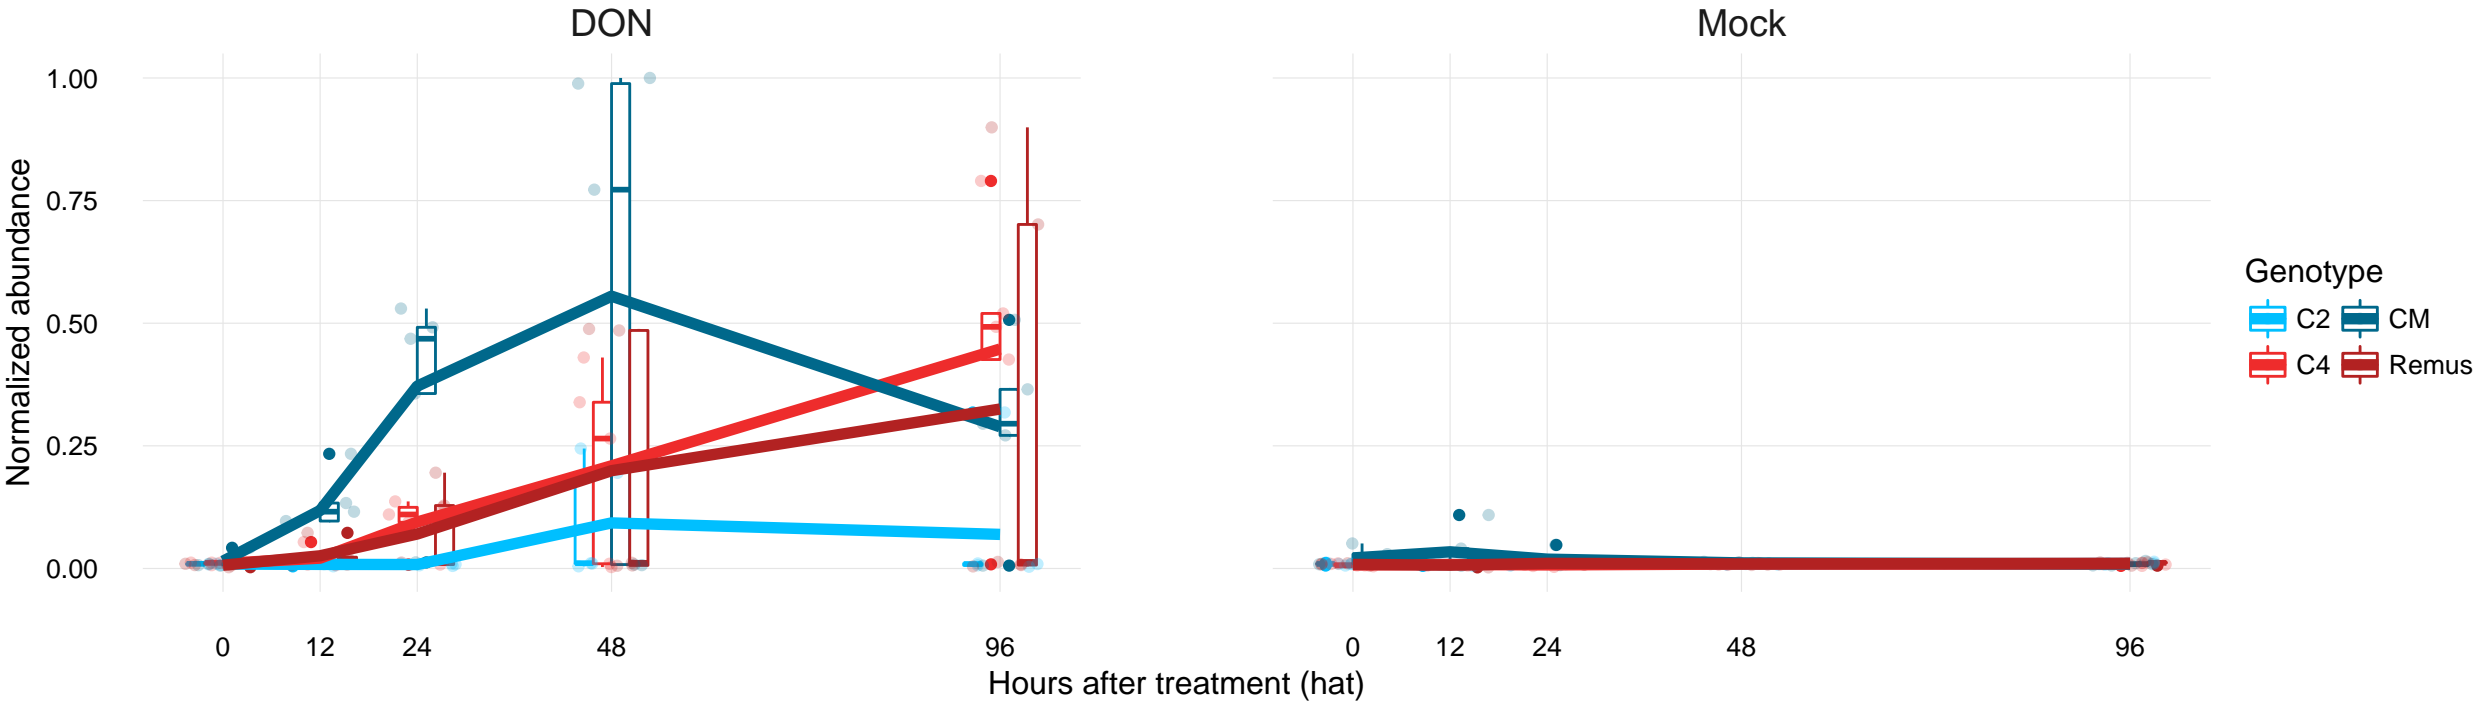

# A.14

Annotated as HCAA  
(2 database hits)

|                |                                                |
|----------------|------------------------------------------------|
| MZ             | 251.1393                                       |
| RT             | 6.45 min                                       |
| Normalization  | Indirectly via surrogate<br>in the KPX samples |
| Cluster        | –                                              |
| Cn total / Phe | 13 / 9                                         |

## C2, C4; different treatments

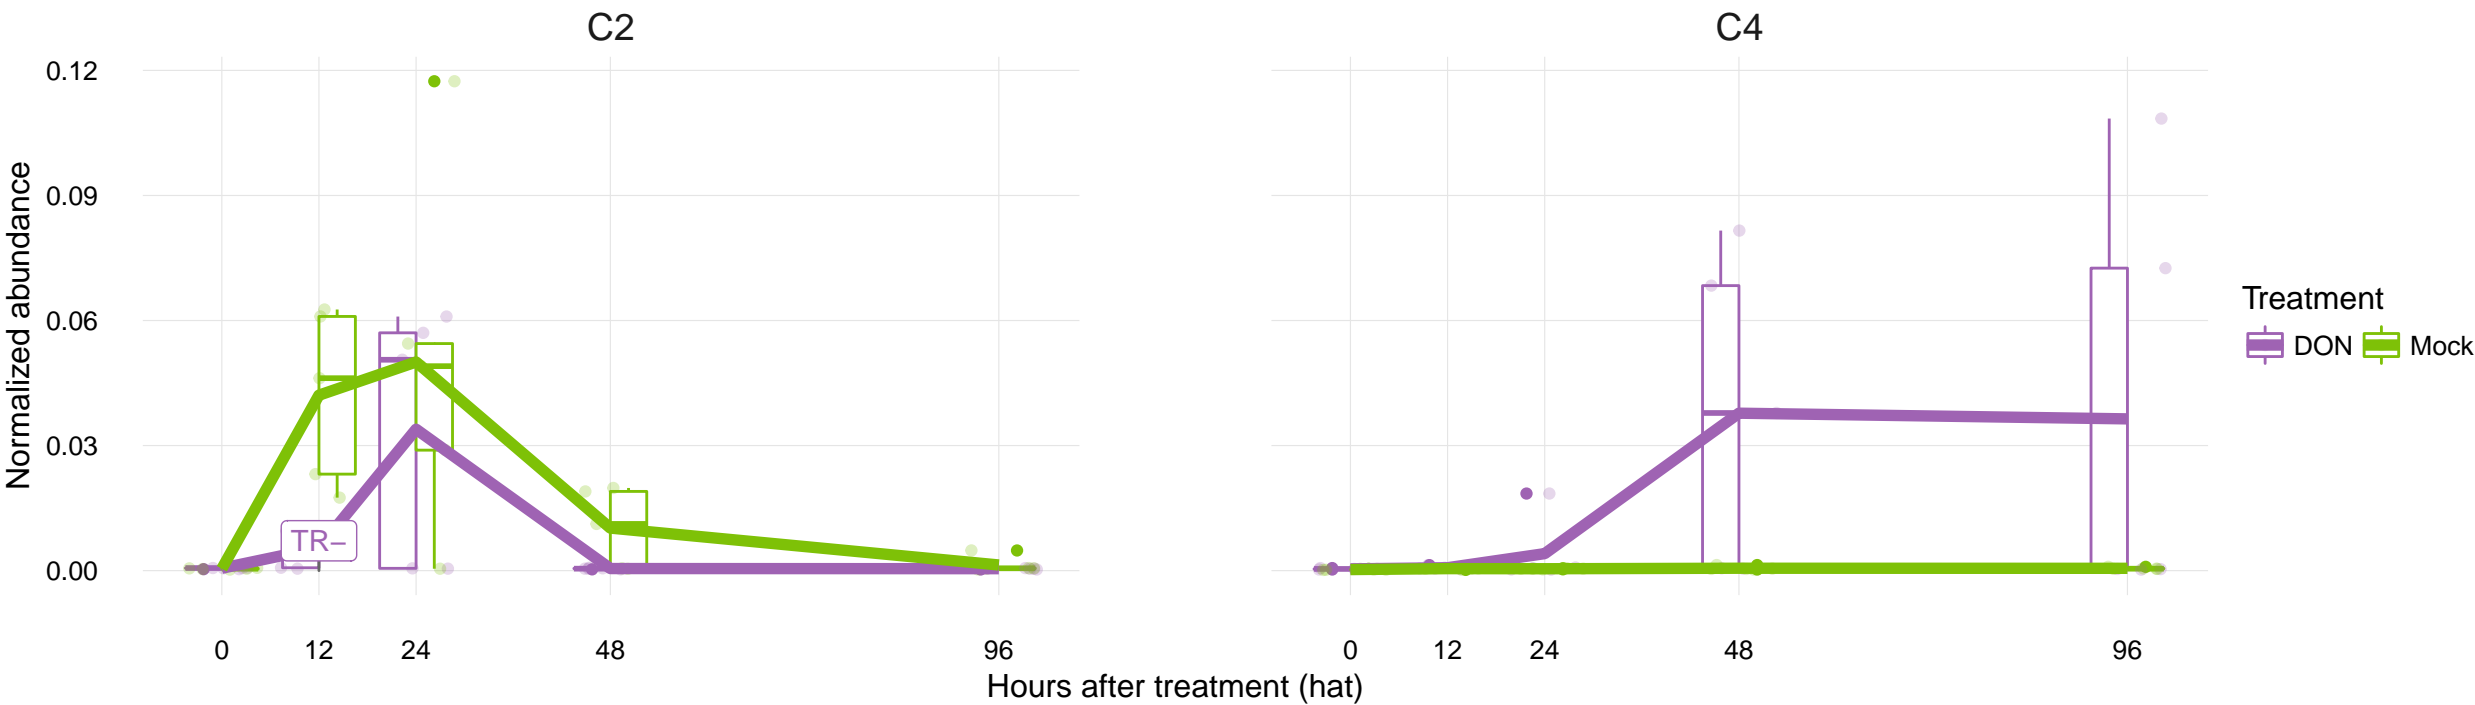

## DON, Mock; different genotypes

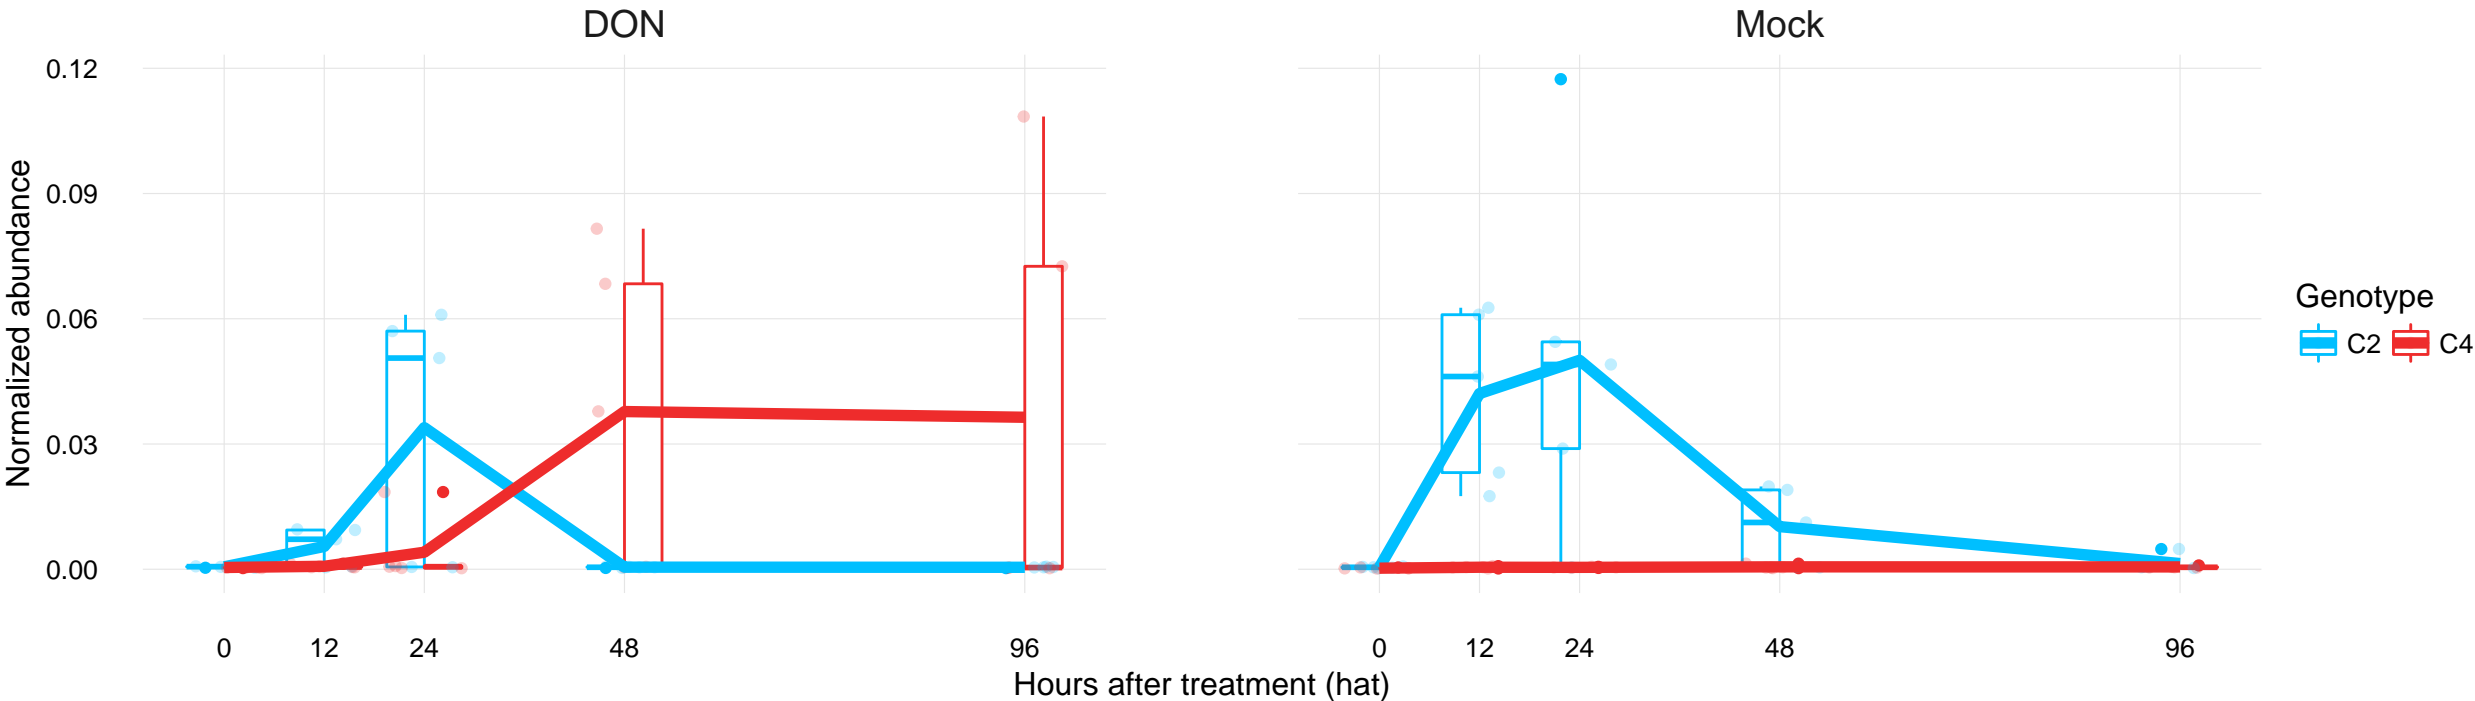

## CM, Remus; different treatments

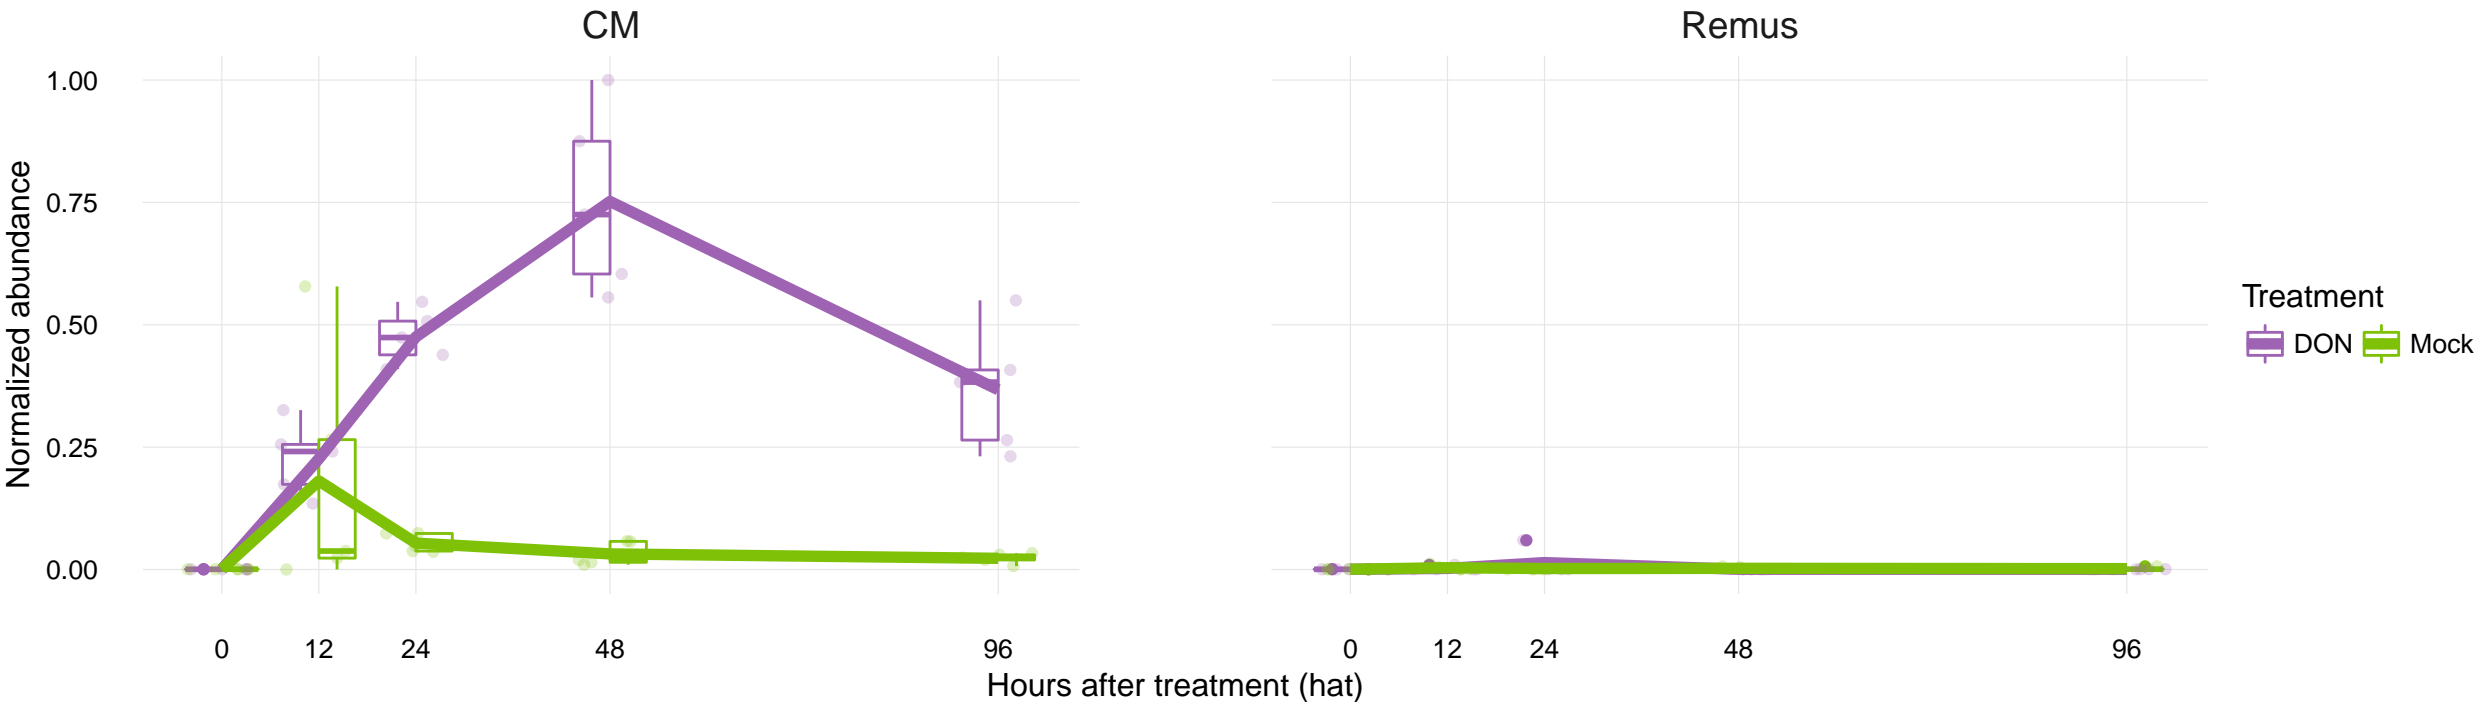

## DON, Mock; all four genotypes

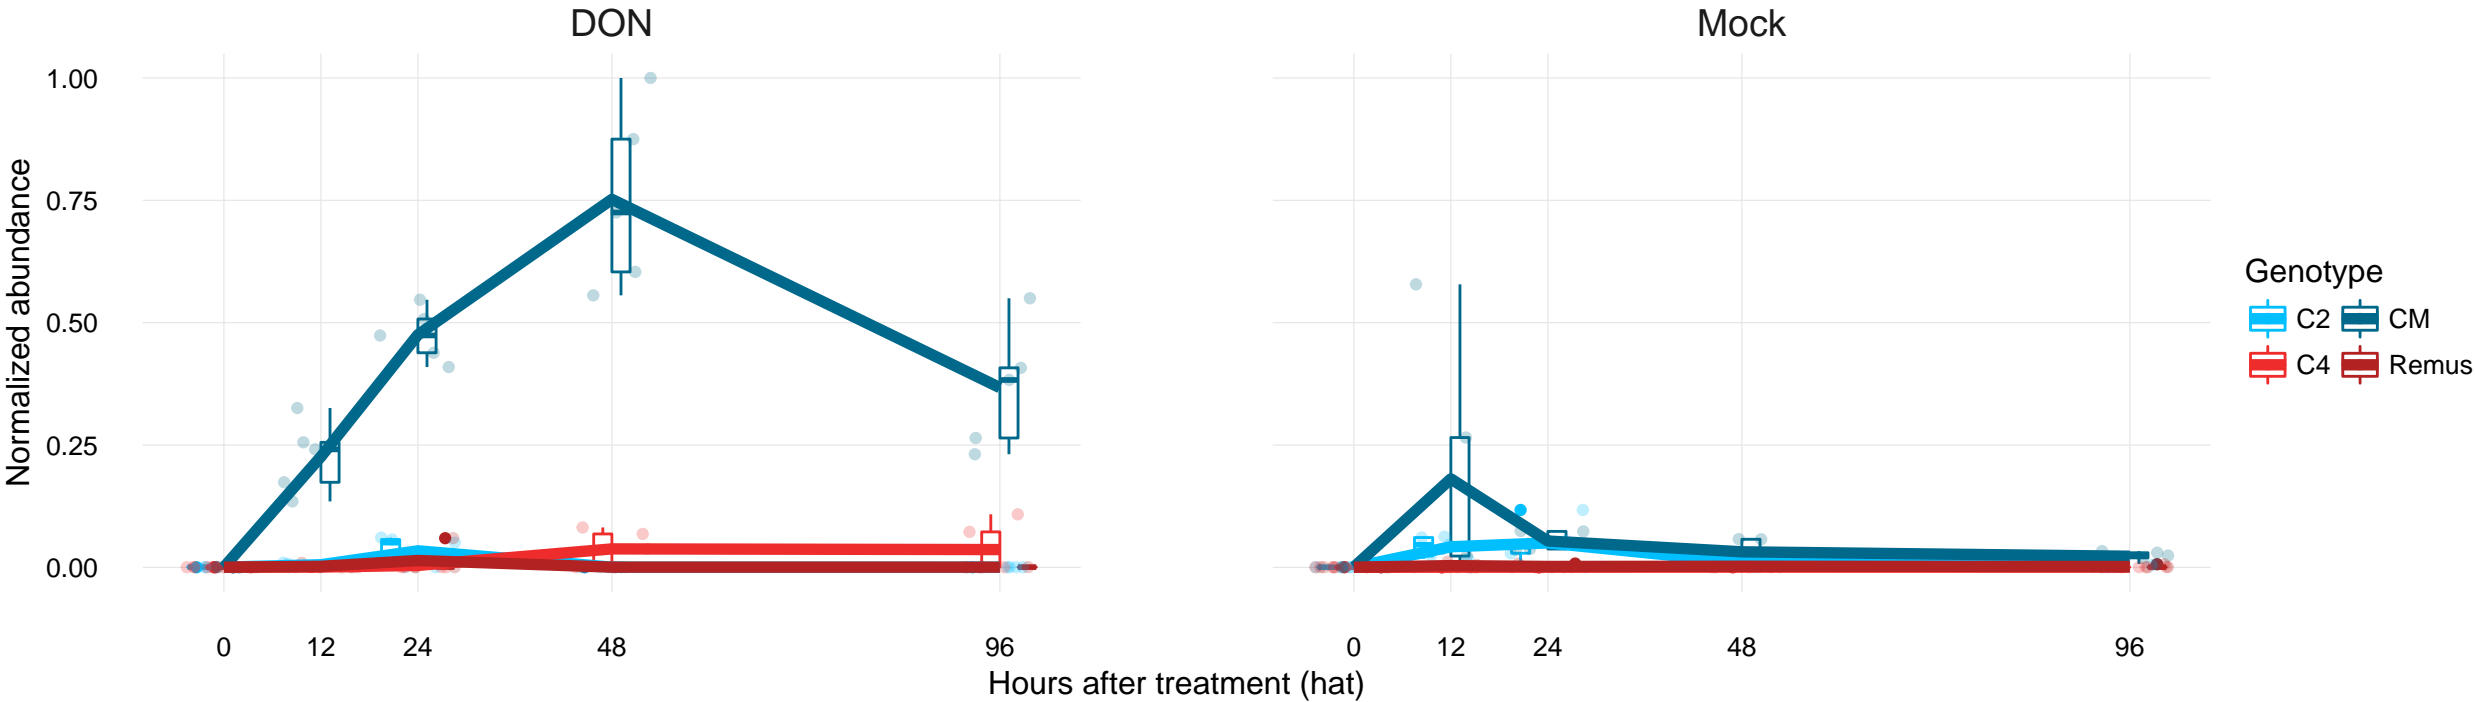

# Sinapaldehyde

Identified metabolite (level 1)

|                |                          |
|----------------|--------------------------|
| MZ             | 209.0809                 |
| RT             | 14.46 min                |
| Normalization  | Directly via KPX samples |
| Cluster        | –                        |
| Cn total / Phe | 11 /                     |

C2, C4; different treatments

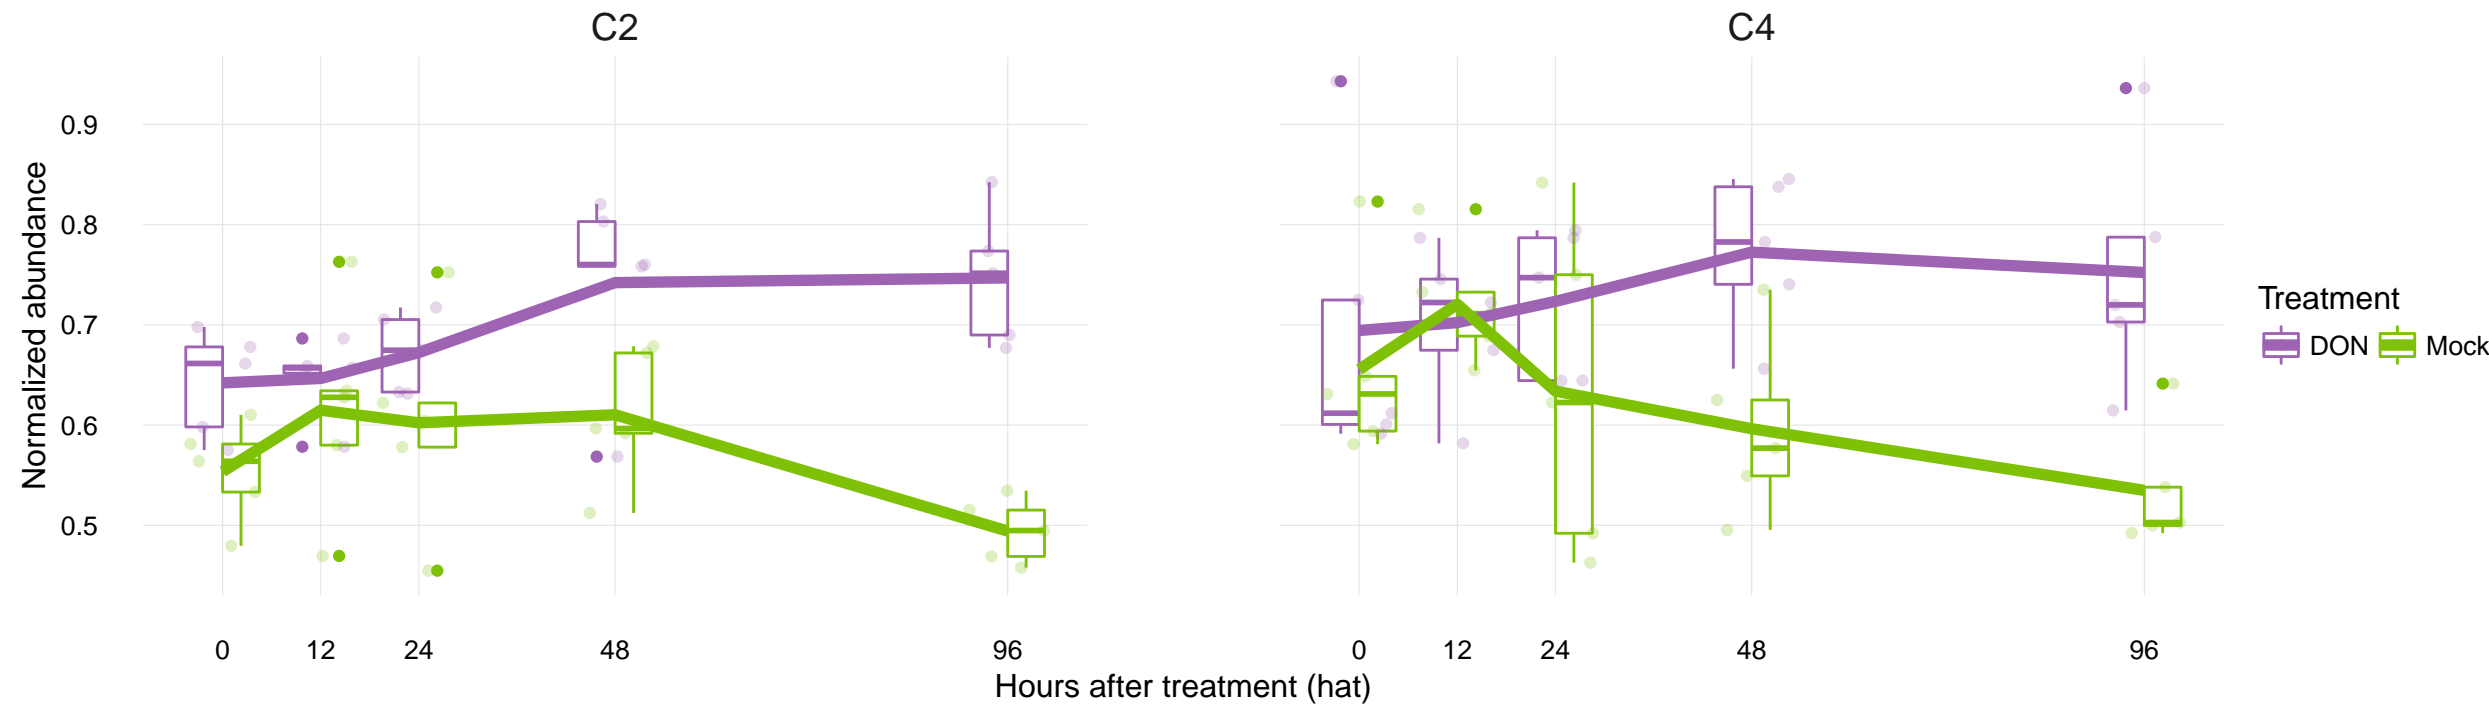

DON, Mock; different genotypes

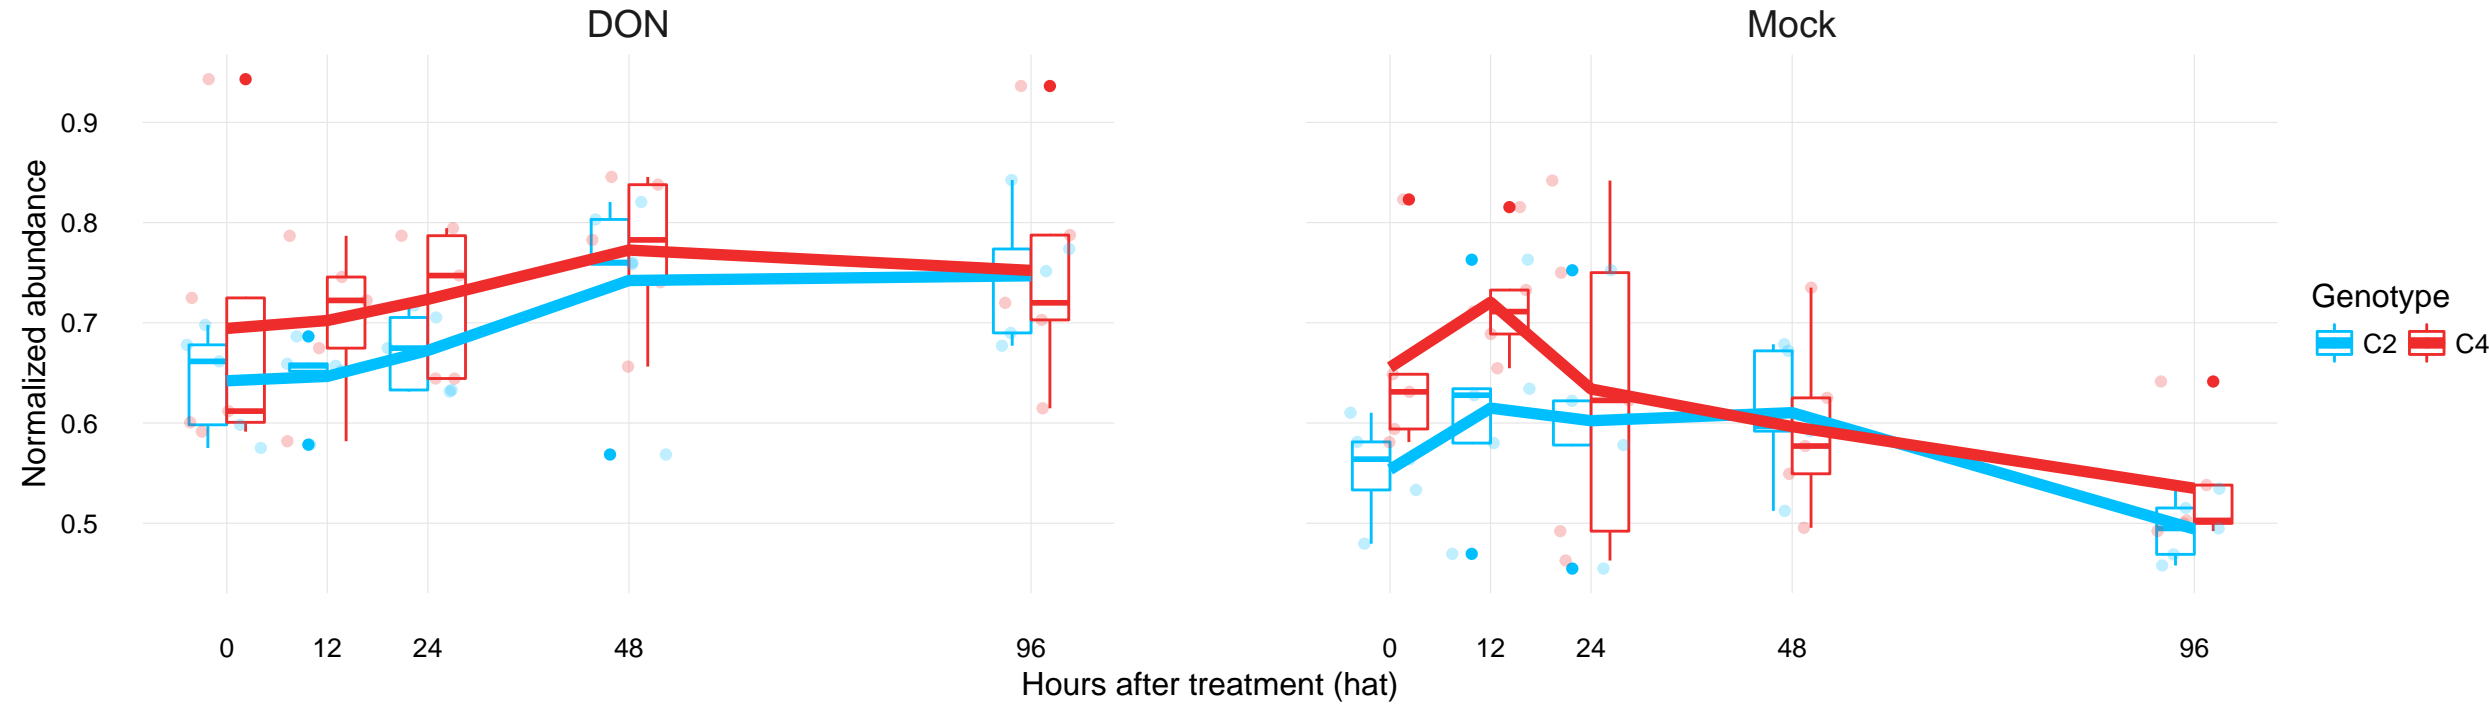

CM, Remus; different treatments

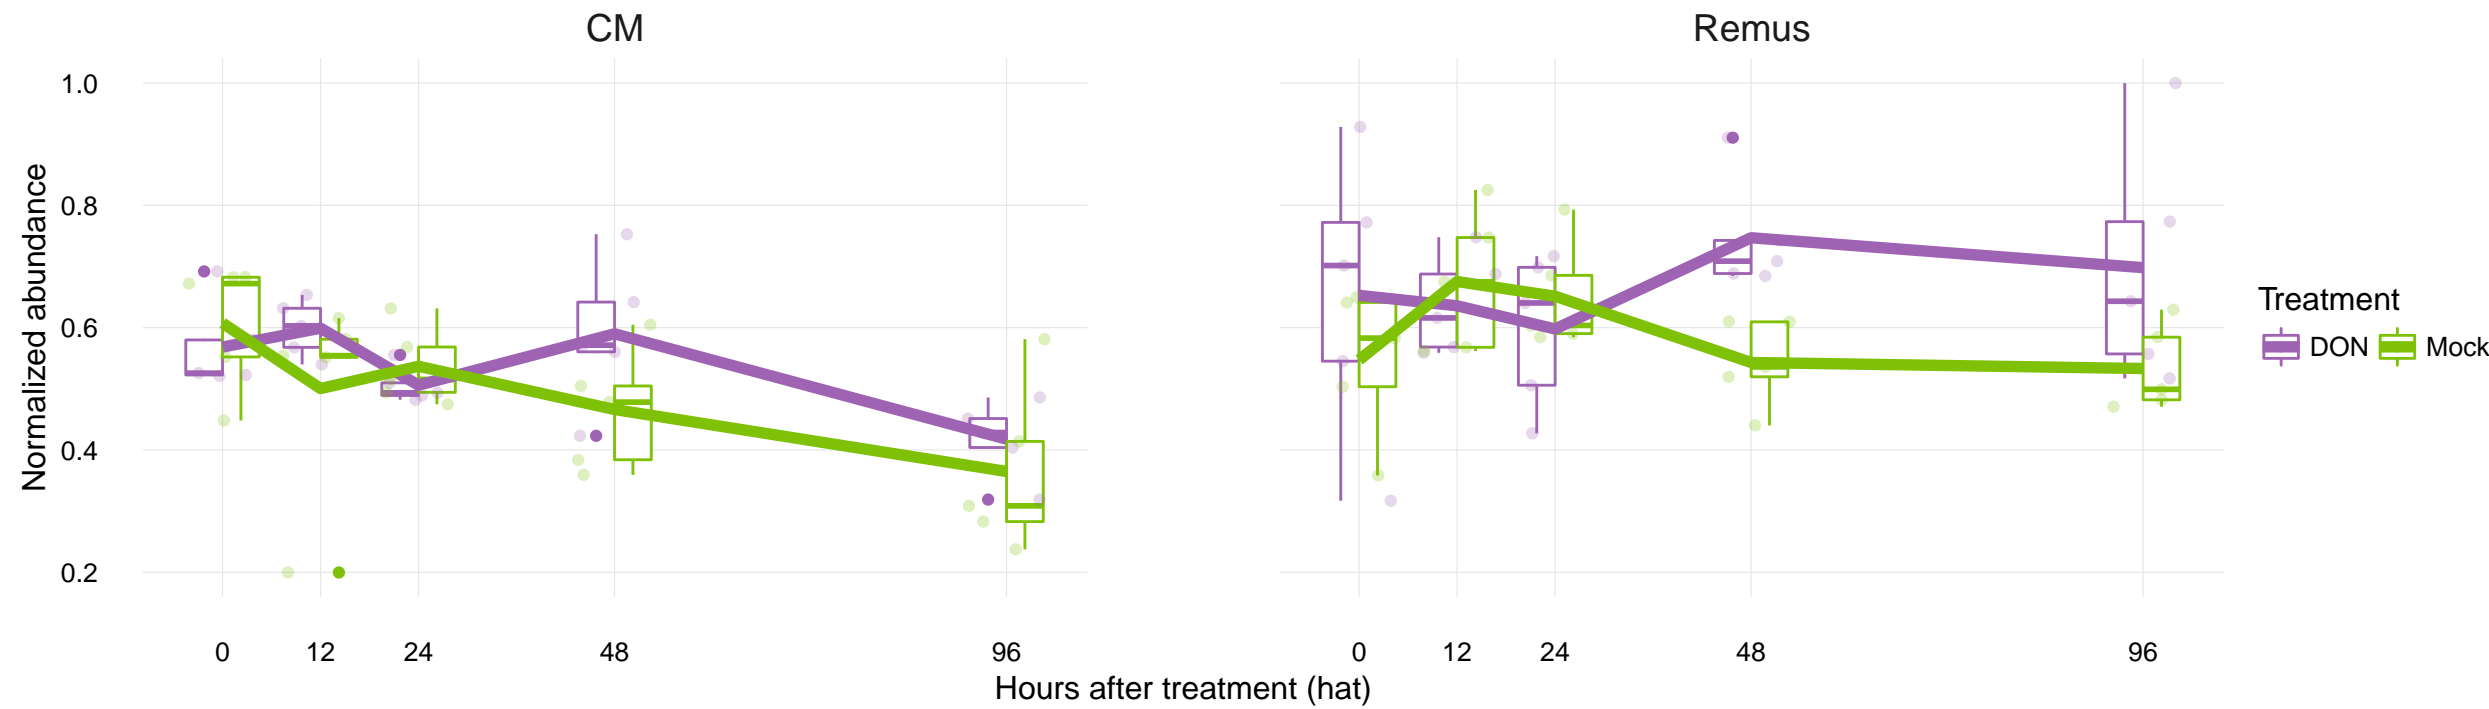

DON, Mock; all four genotypes

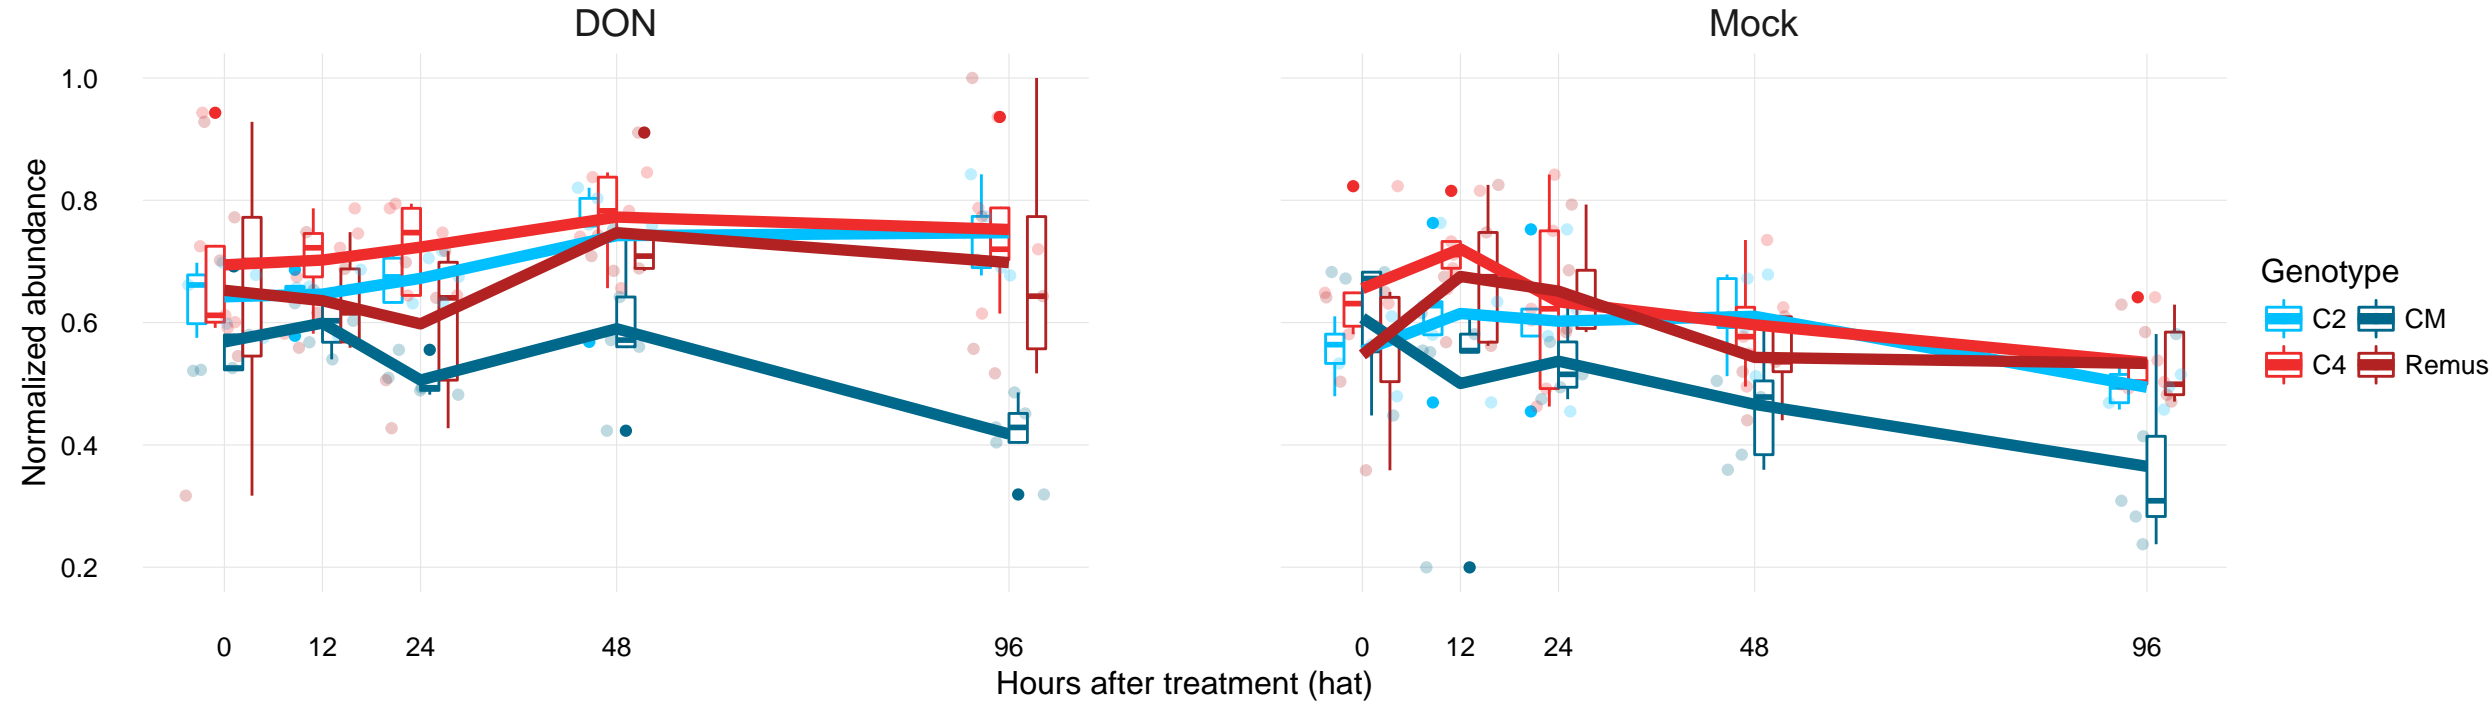

# A.64

Annotated as Putative phenylacetic acid derivative  
(1 database hit)

|                |                                                |
|----------------|------------------------------------------------|
| MZ             | 409.1107                                       |
| RT             | 12.98 min                                      |
| Normalization  | Indirectly via surrogate<br>in the KPX samples |
| Cluster        | —                                              |
| Cn total / Phe | 17 / 8                                         |

## C2, C4; different treatments

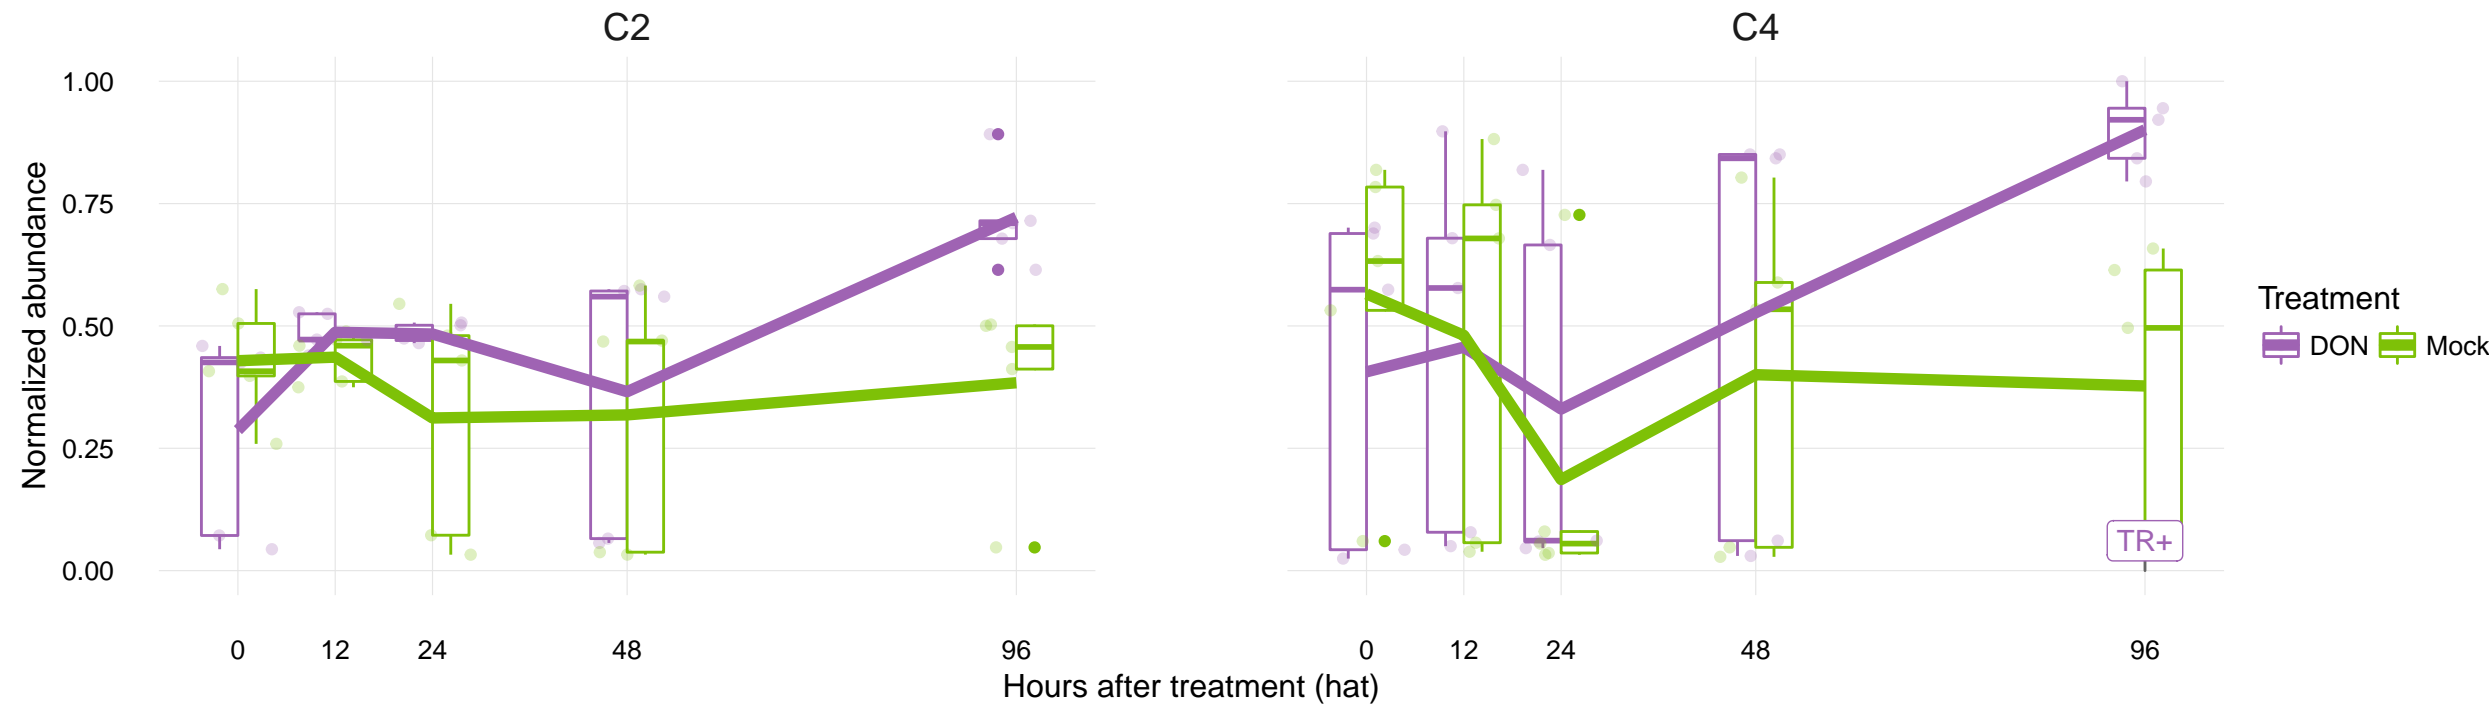

## DON, Mock; different genotypes

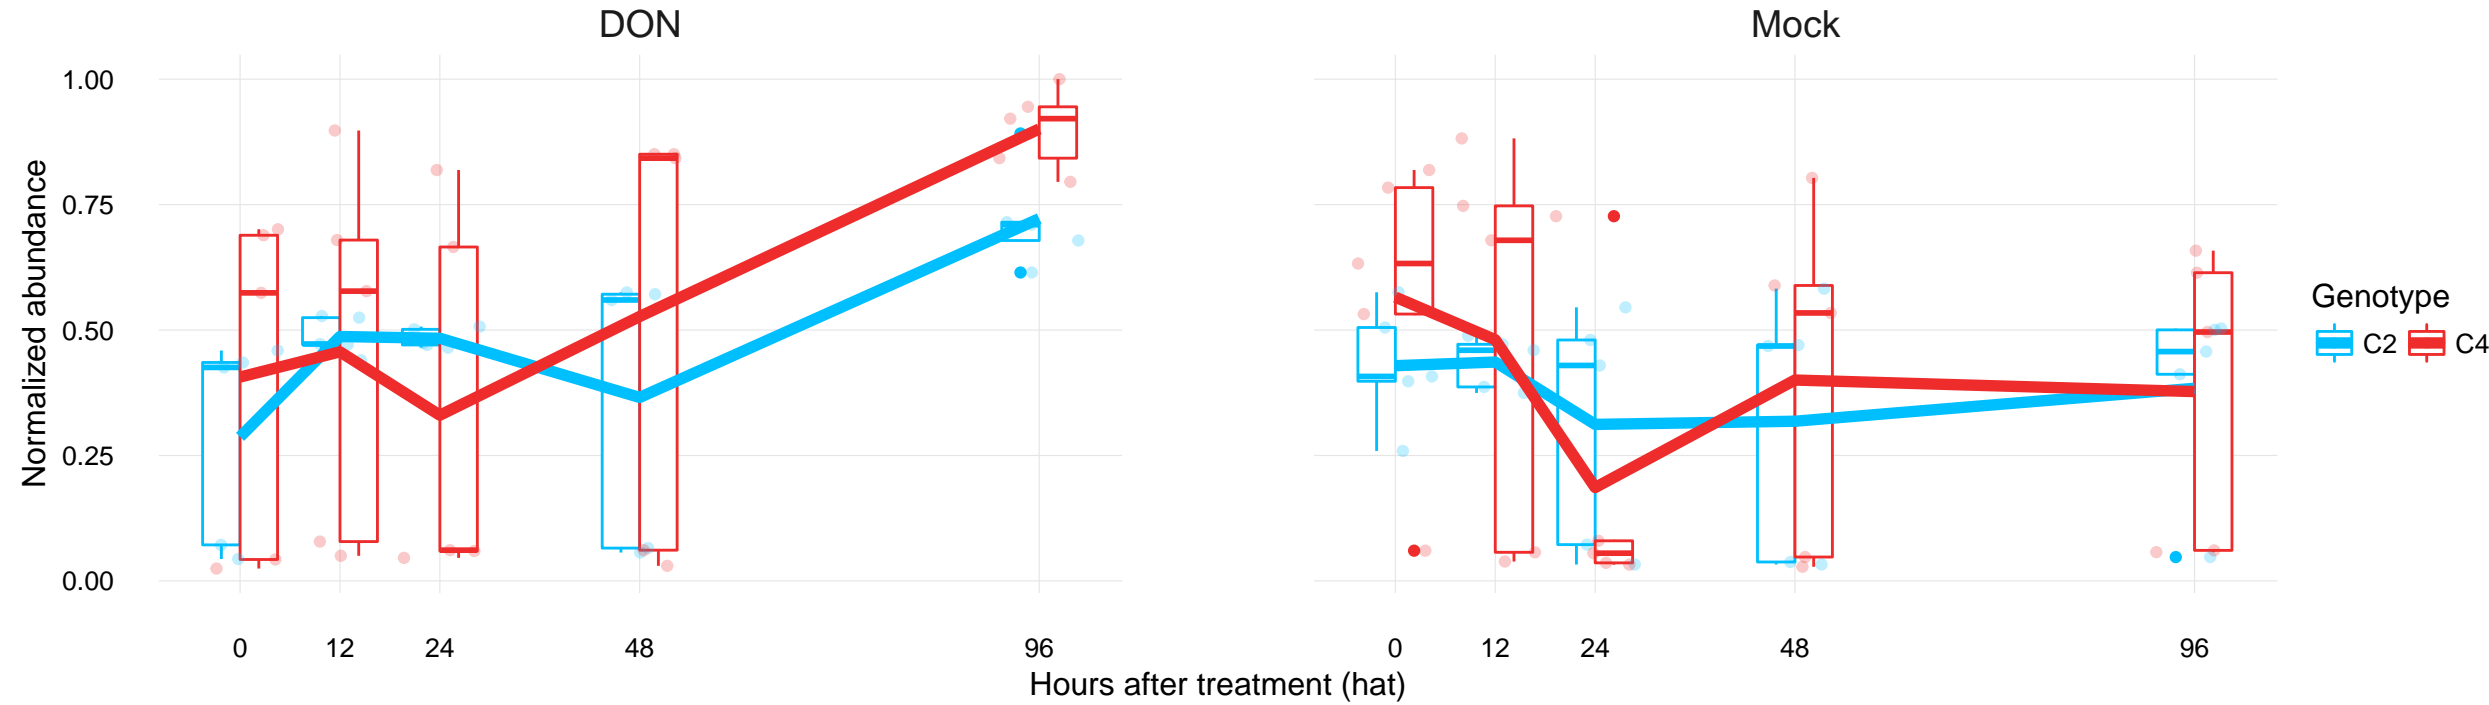

## CM, Remus; different treatments

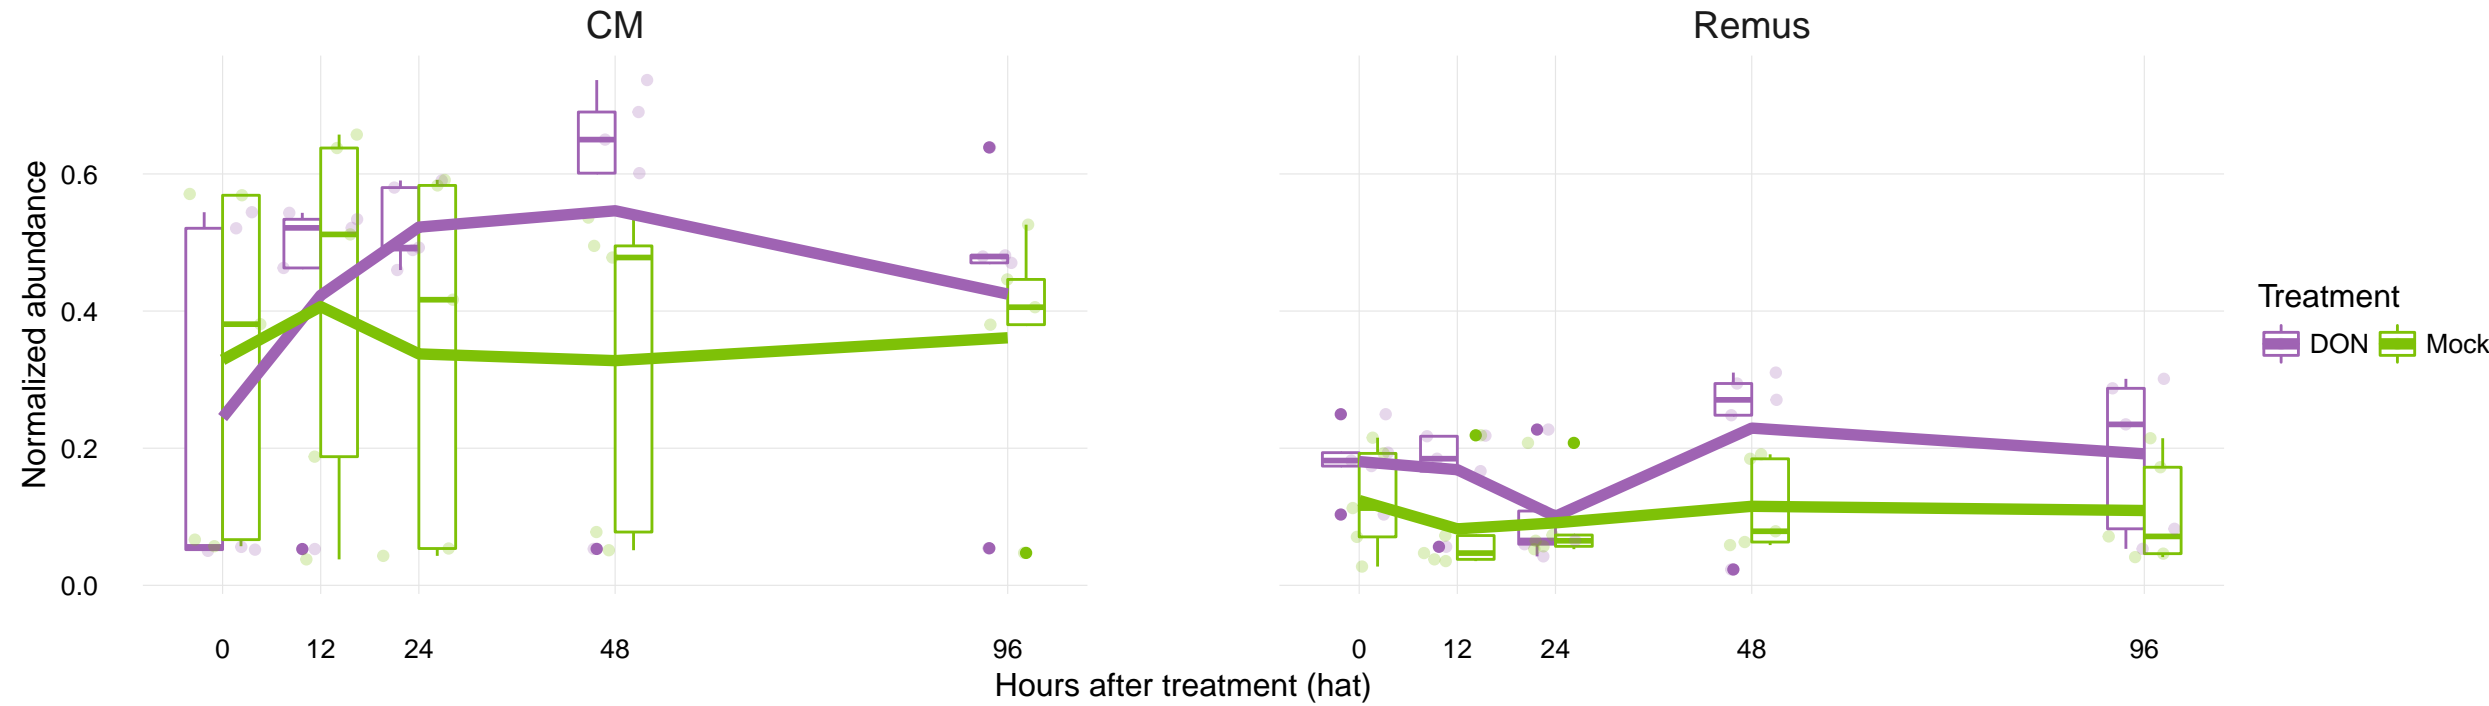

## DON, Mock; all four genotypes

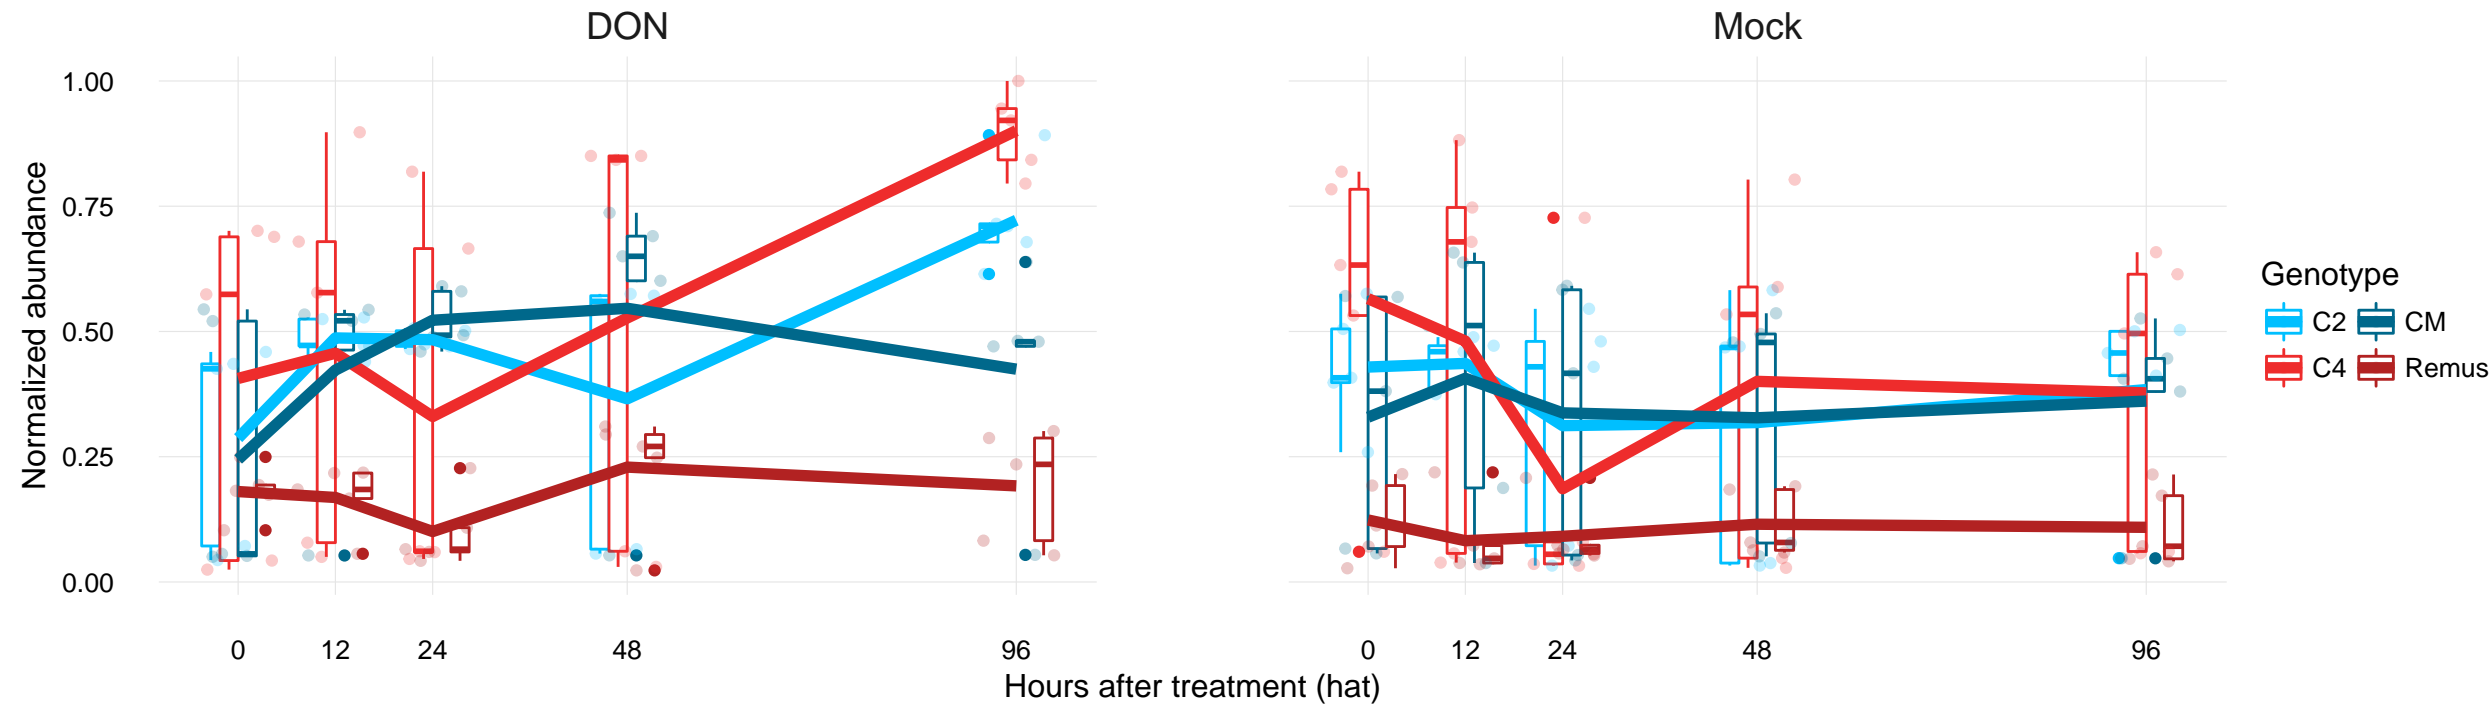

# Sinapyl alcohol

Identified metabolite (level 1)

|                |                          |
|----------------|--------------------------|
| MZ             | 211.0966                 |
| RT             | 12.97 min                |
| Normalization  | Directly via KPX samples |
| Cluster        | –                        |
| Cn total / Phe | 11 /                     |

C2, C4; different treatments

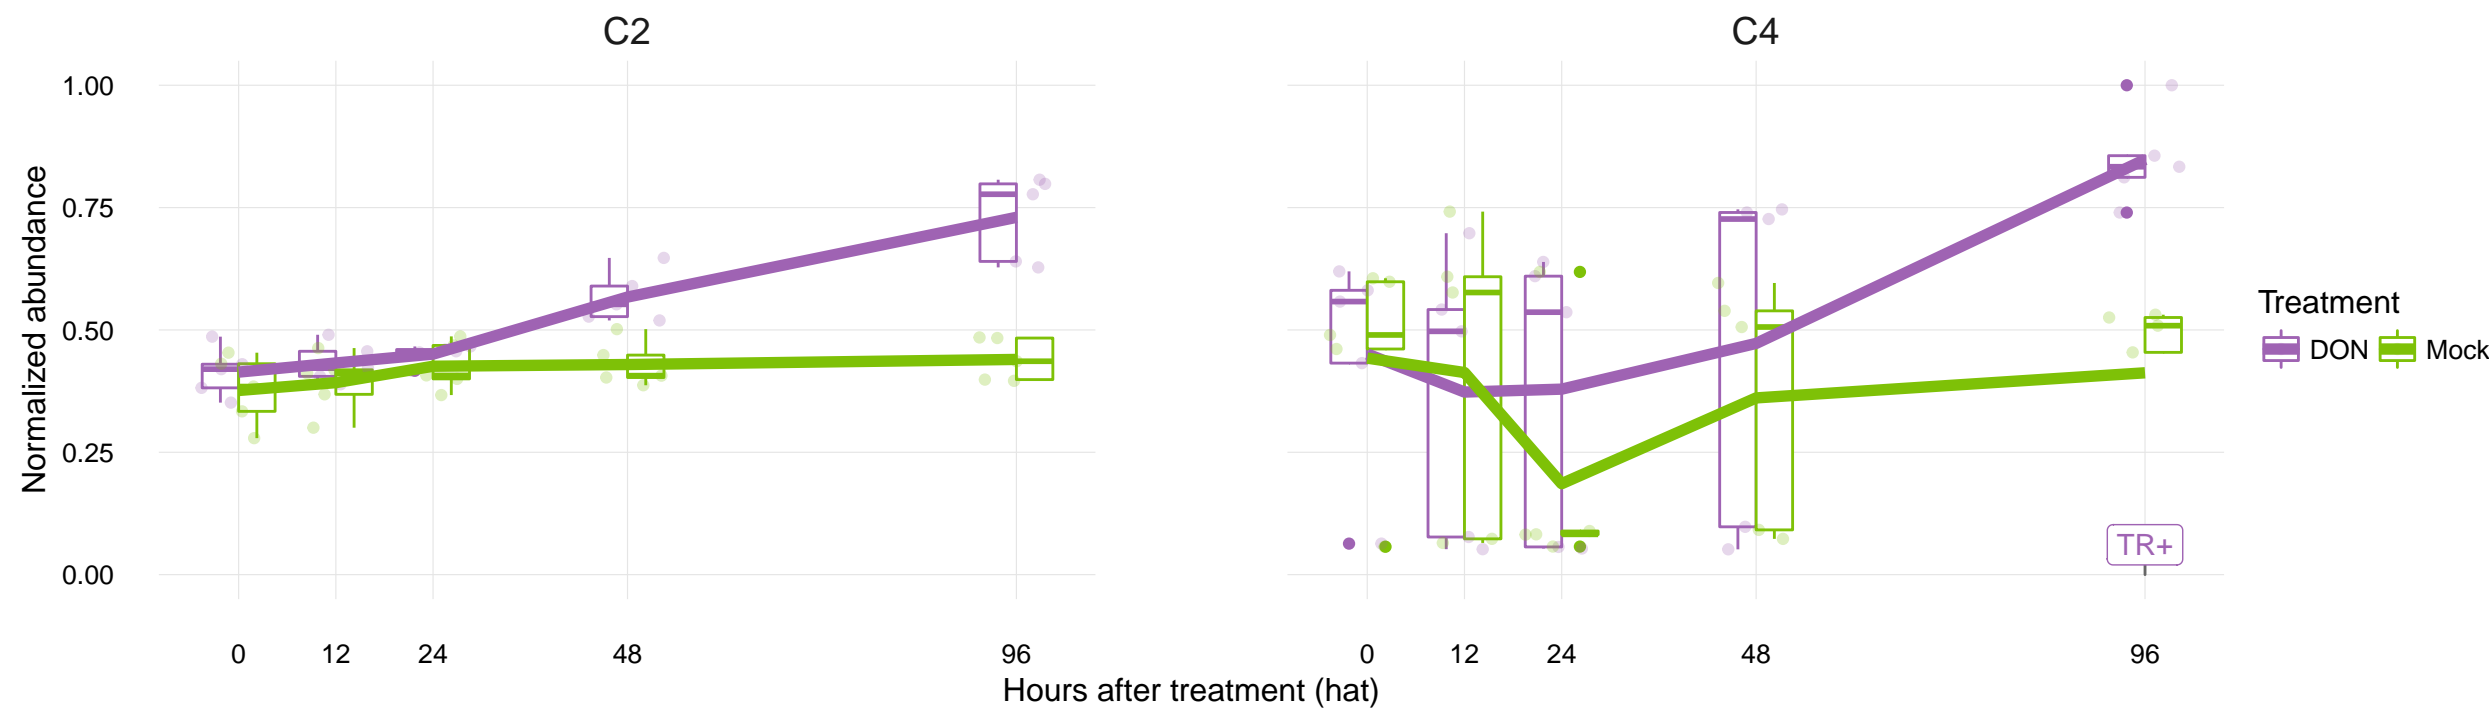

DON, Mock; different genotypes

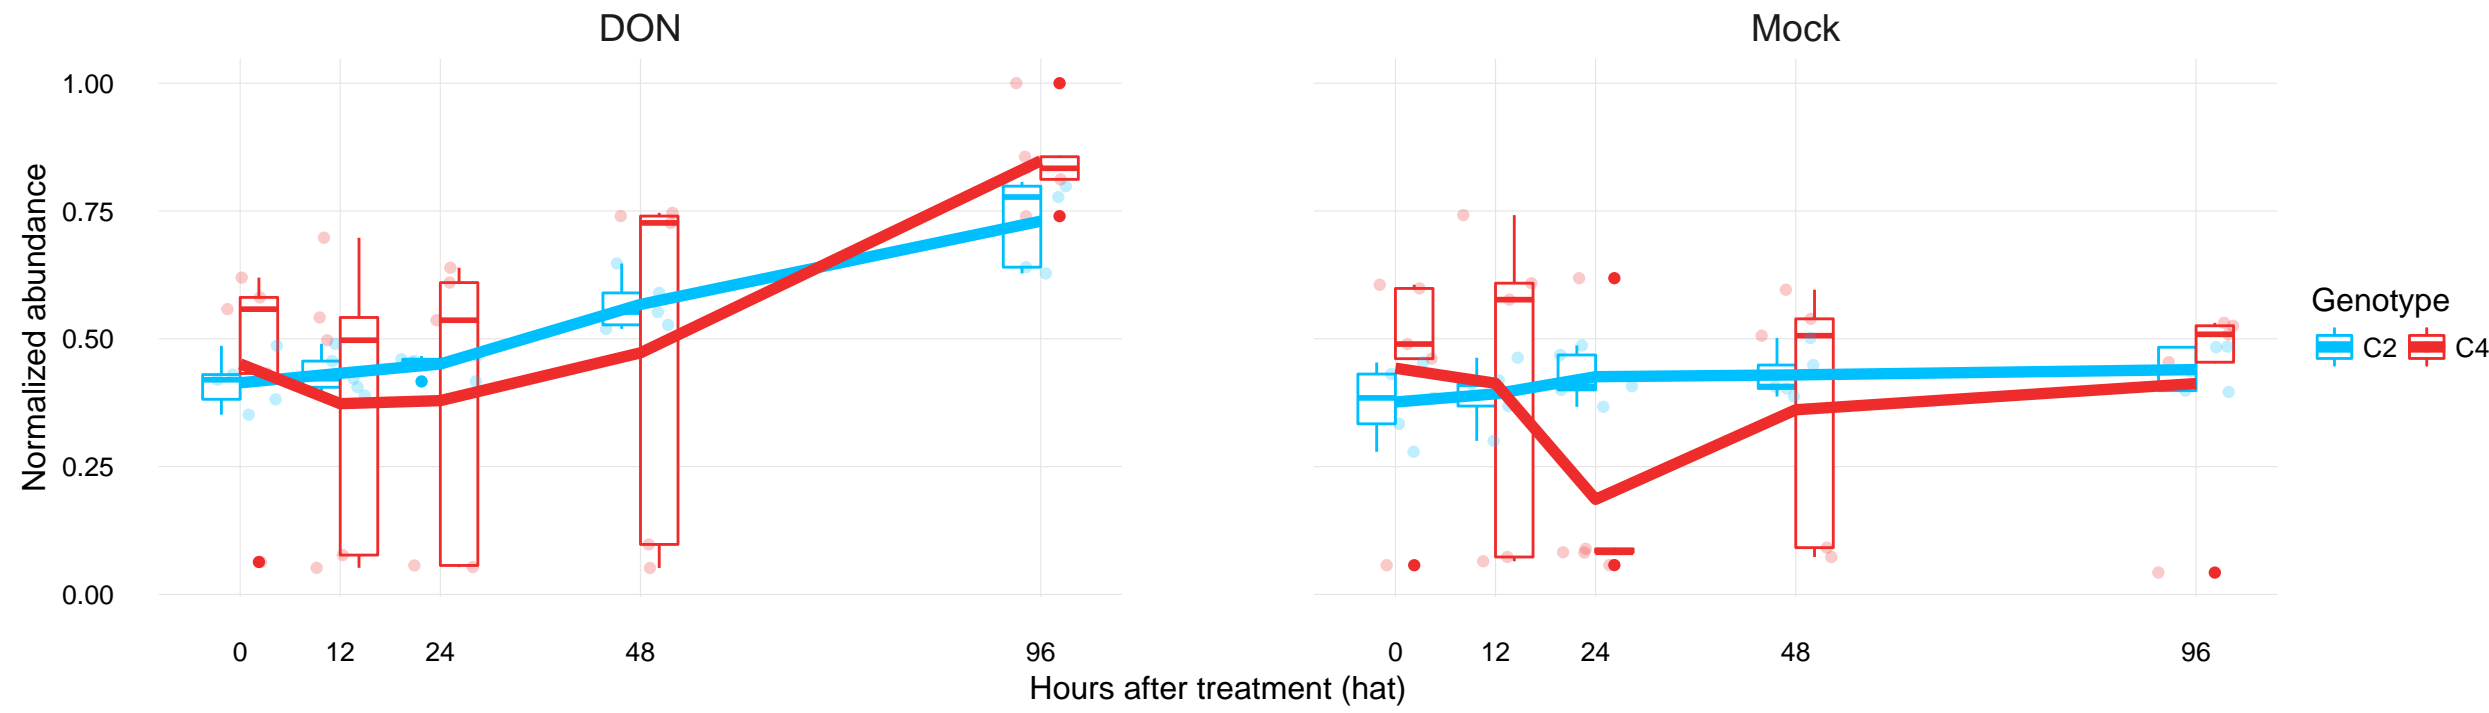

CM, Remus; different treatments

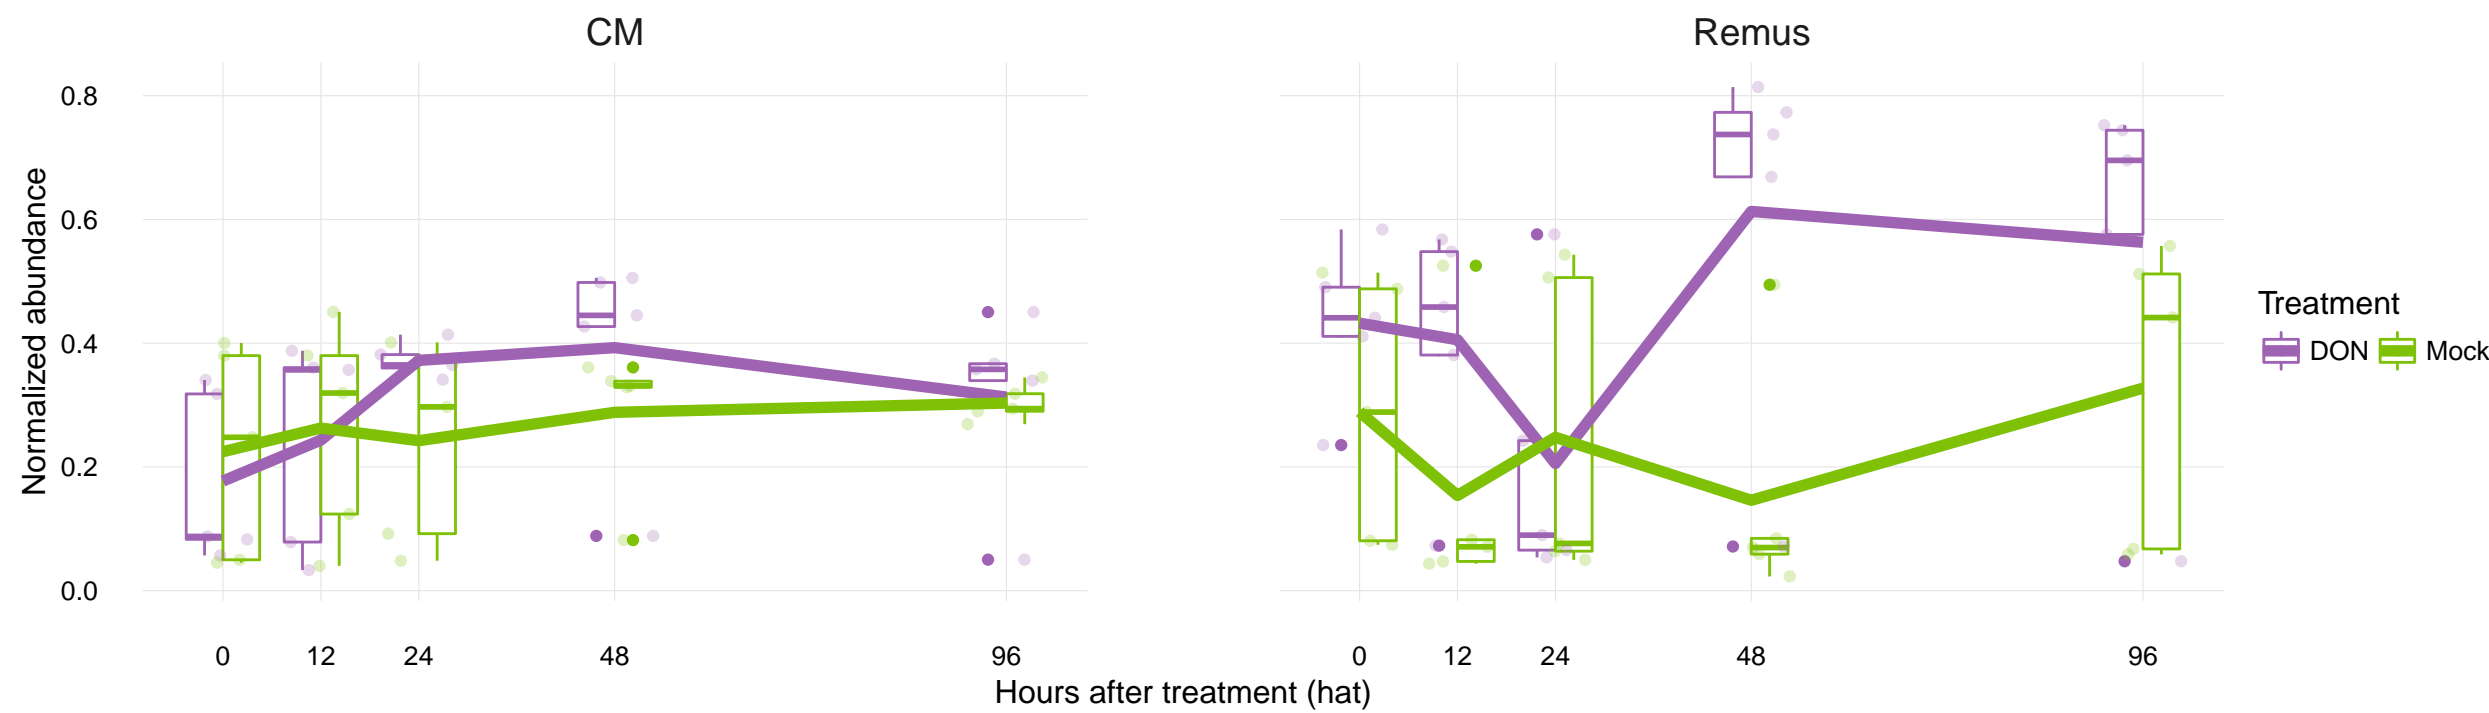

DON, Mock; all four genotypes

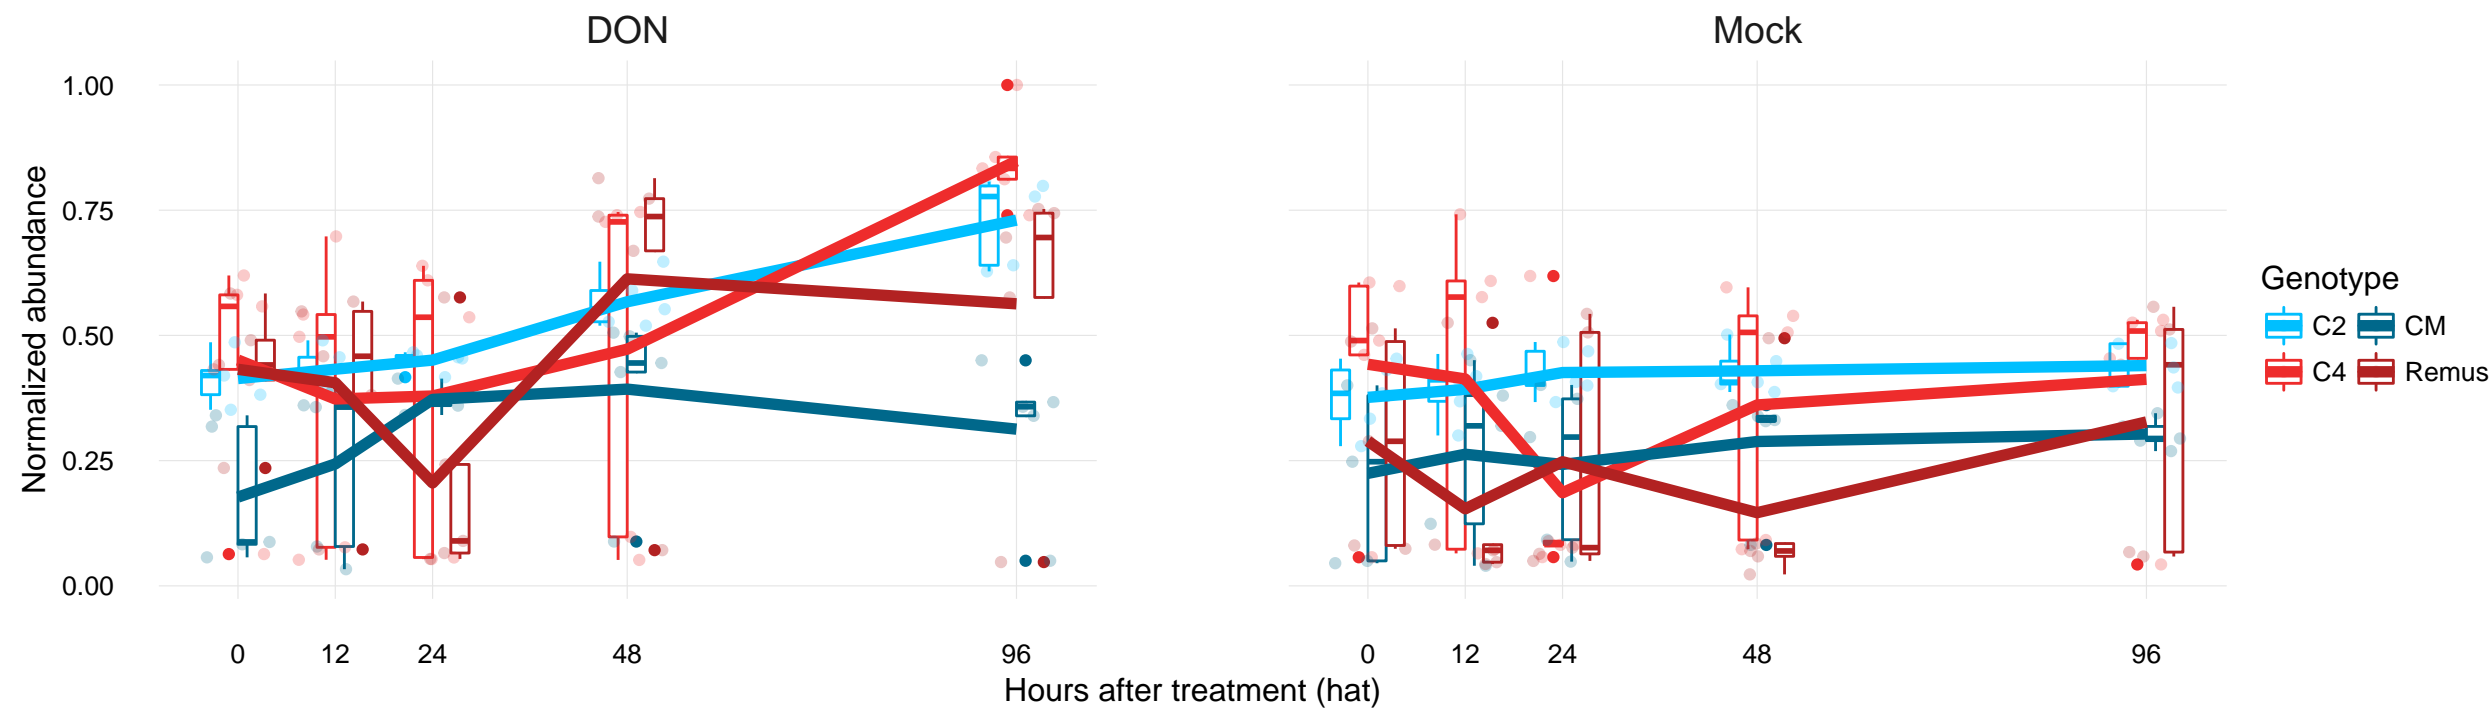



# Phenylalanine

Identified metabolite (level 1)

|                |                |
|----------------|----------------|
| MZ             | 166.0864       |
| RT             | 4.46 min       |
| Normalization  | Not normalized |
| Cluster        | –              |
| Cn total / Phe | 9 / 9          |

C2, C4; different treatments

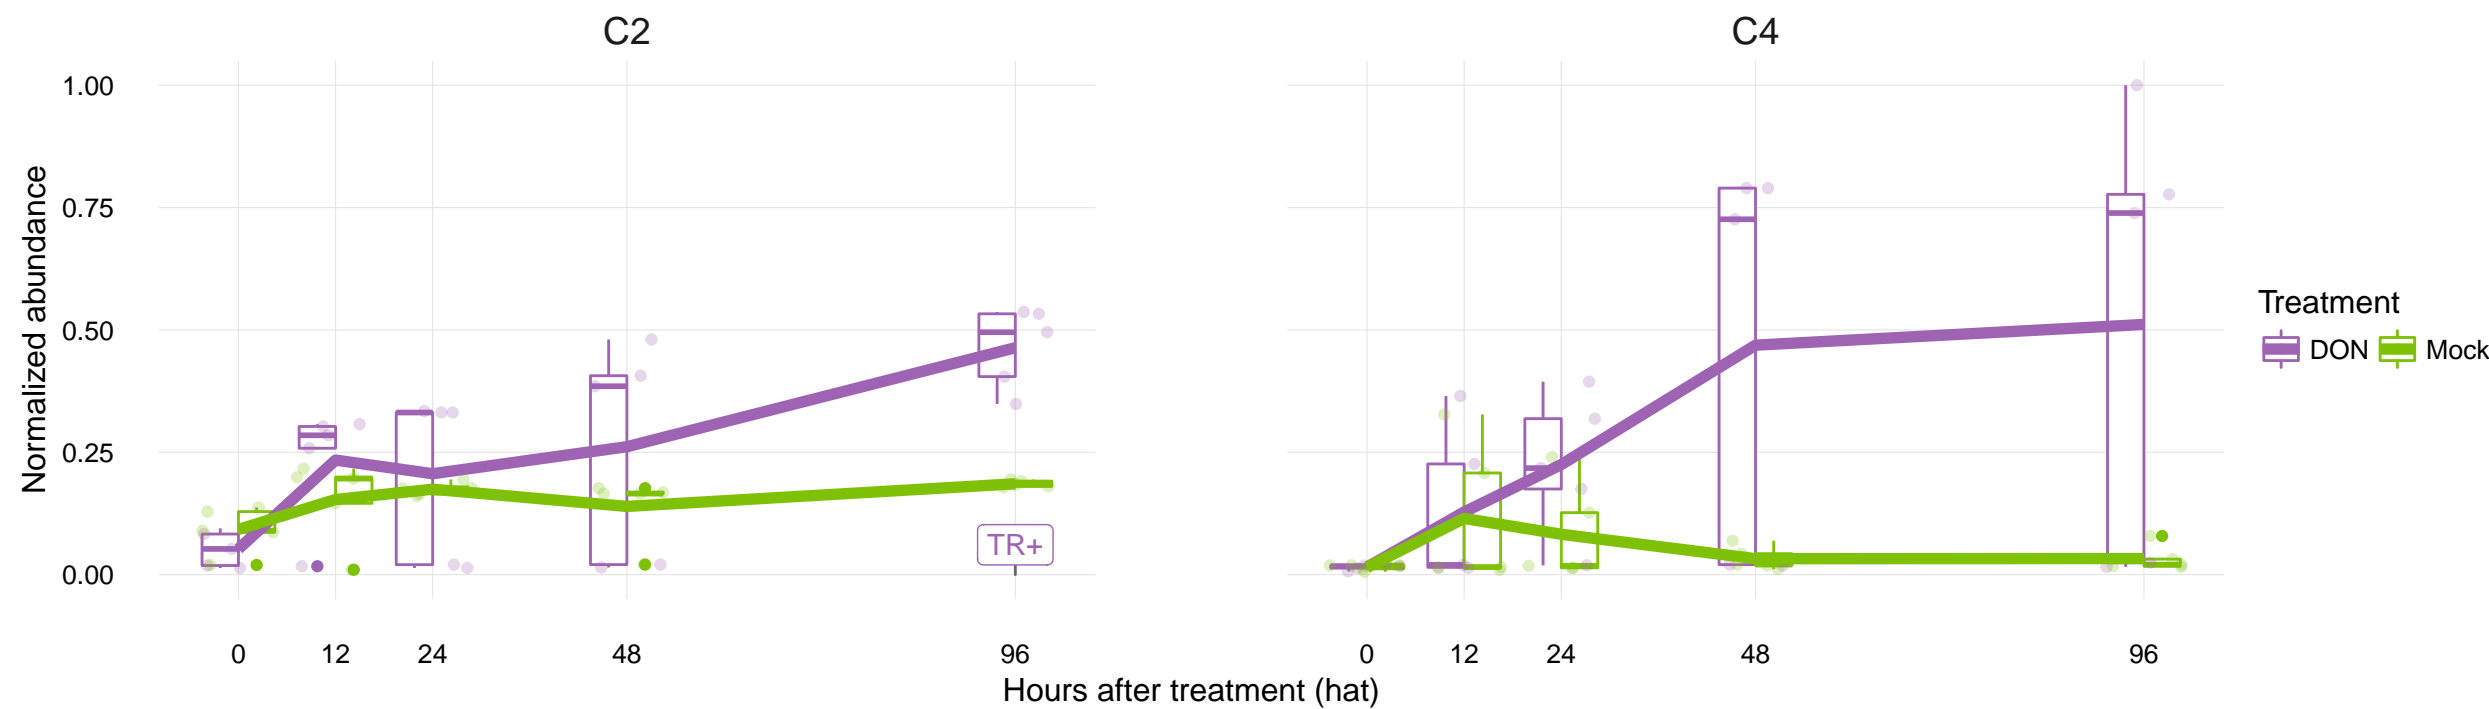

DON, Mock; different genotypes

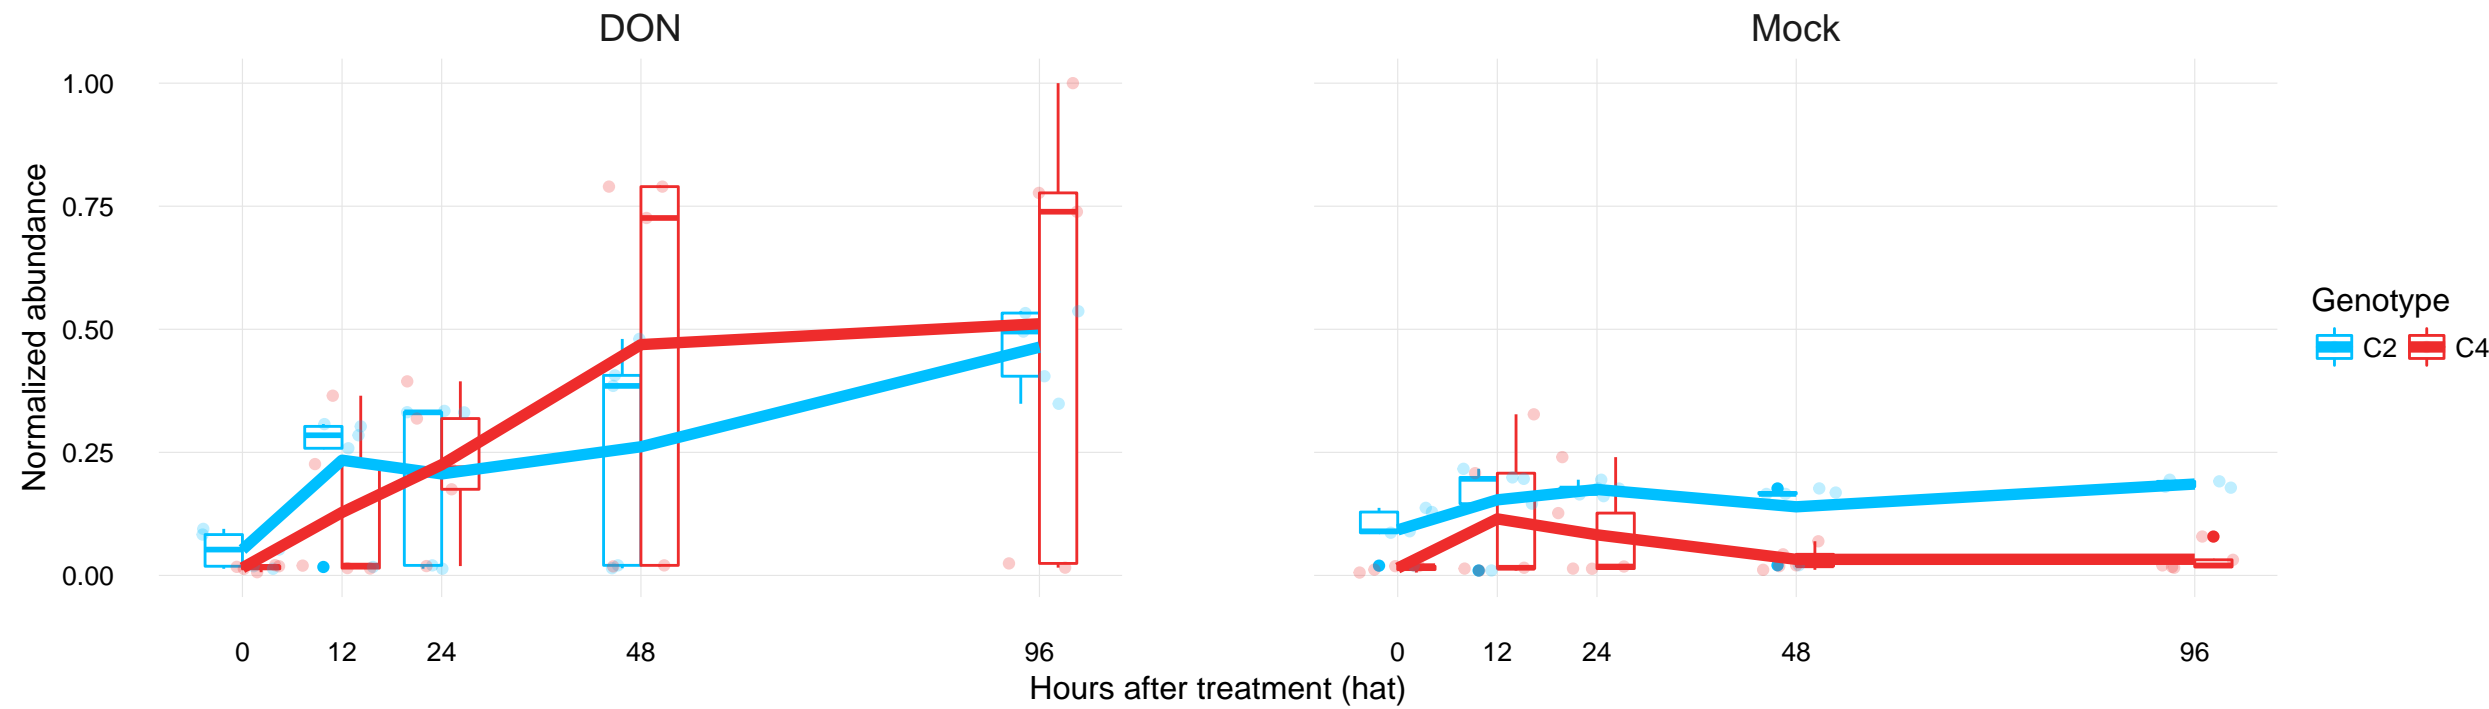

CM, Remus; different treatments

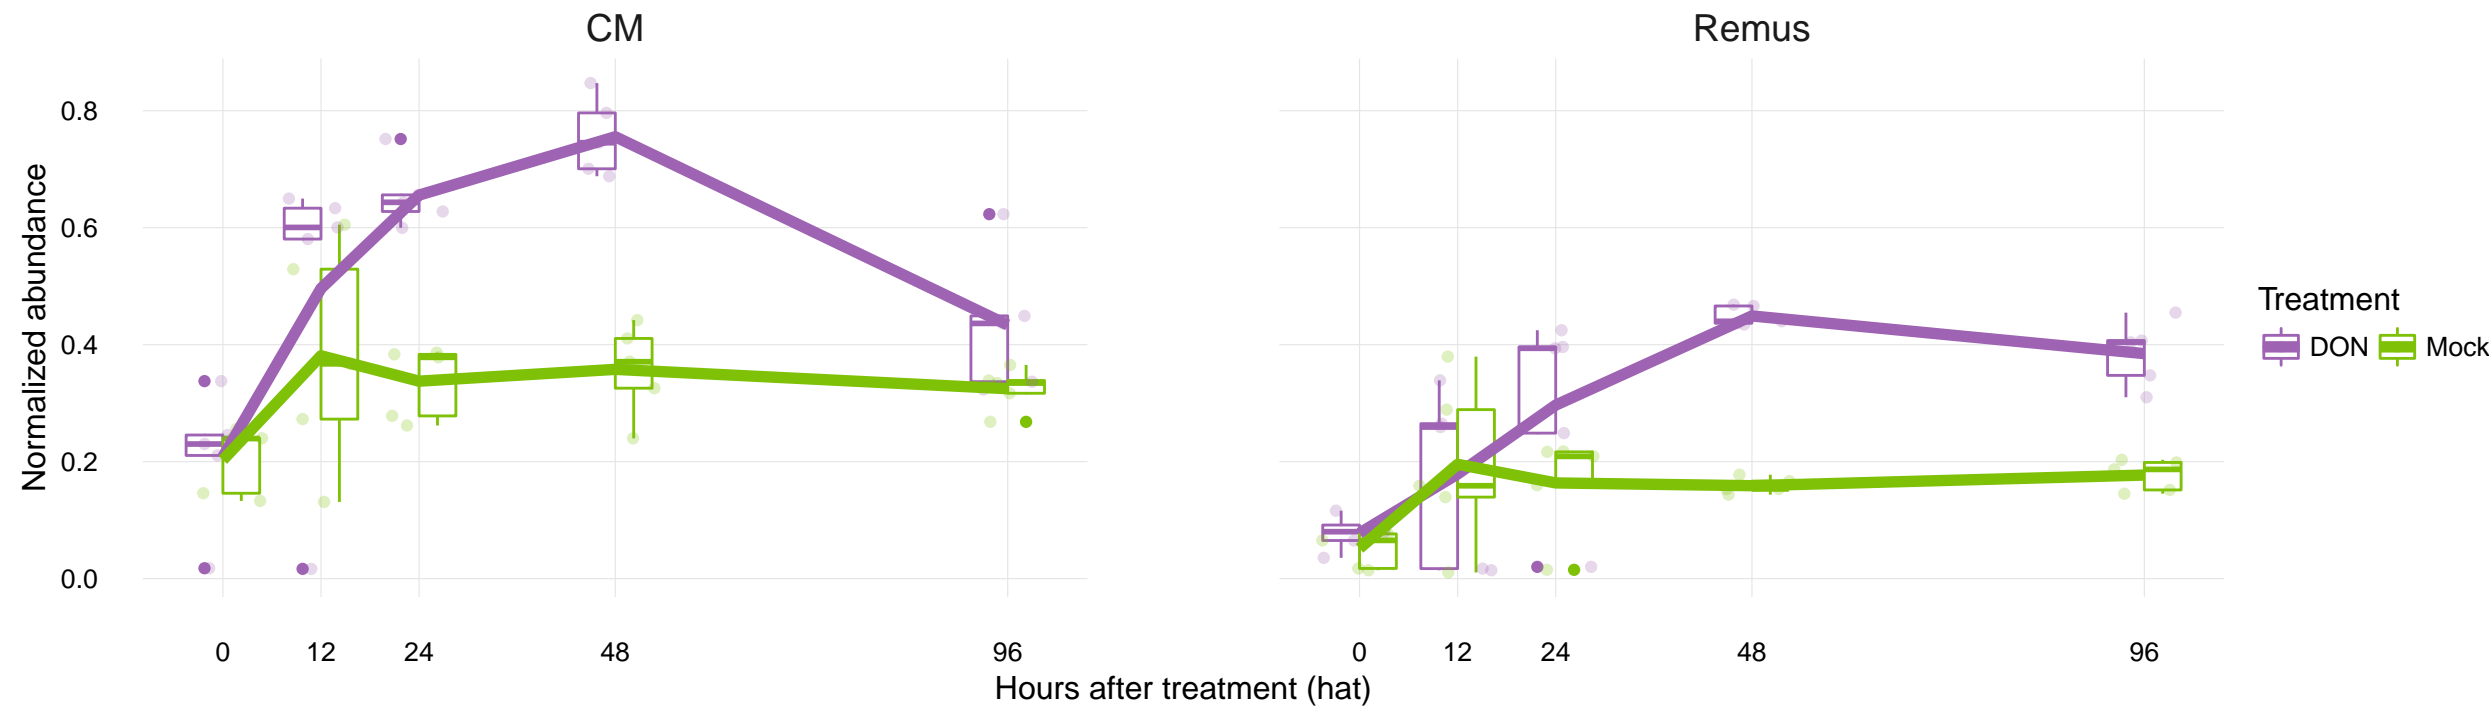

DON, Mock; all four genotypes

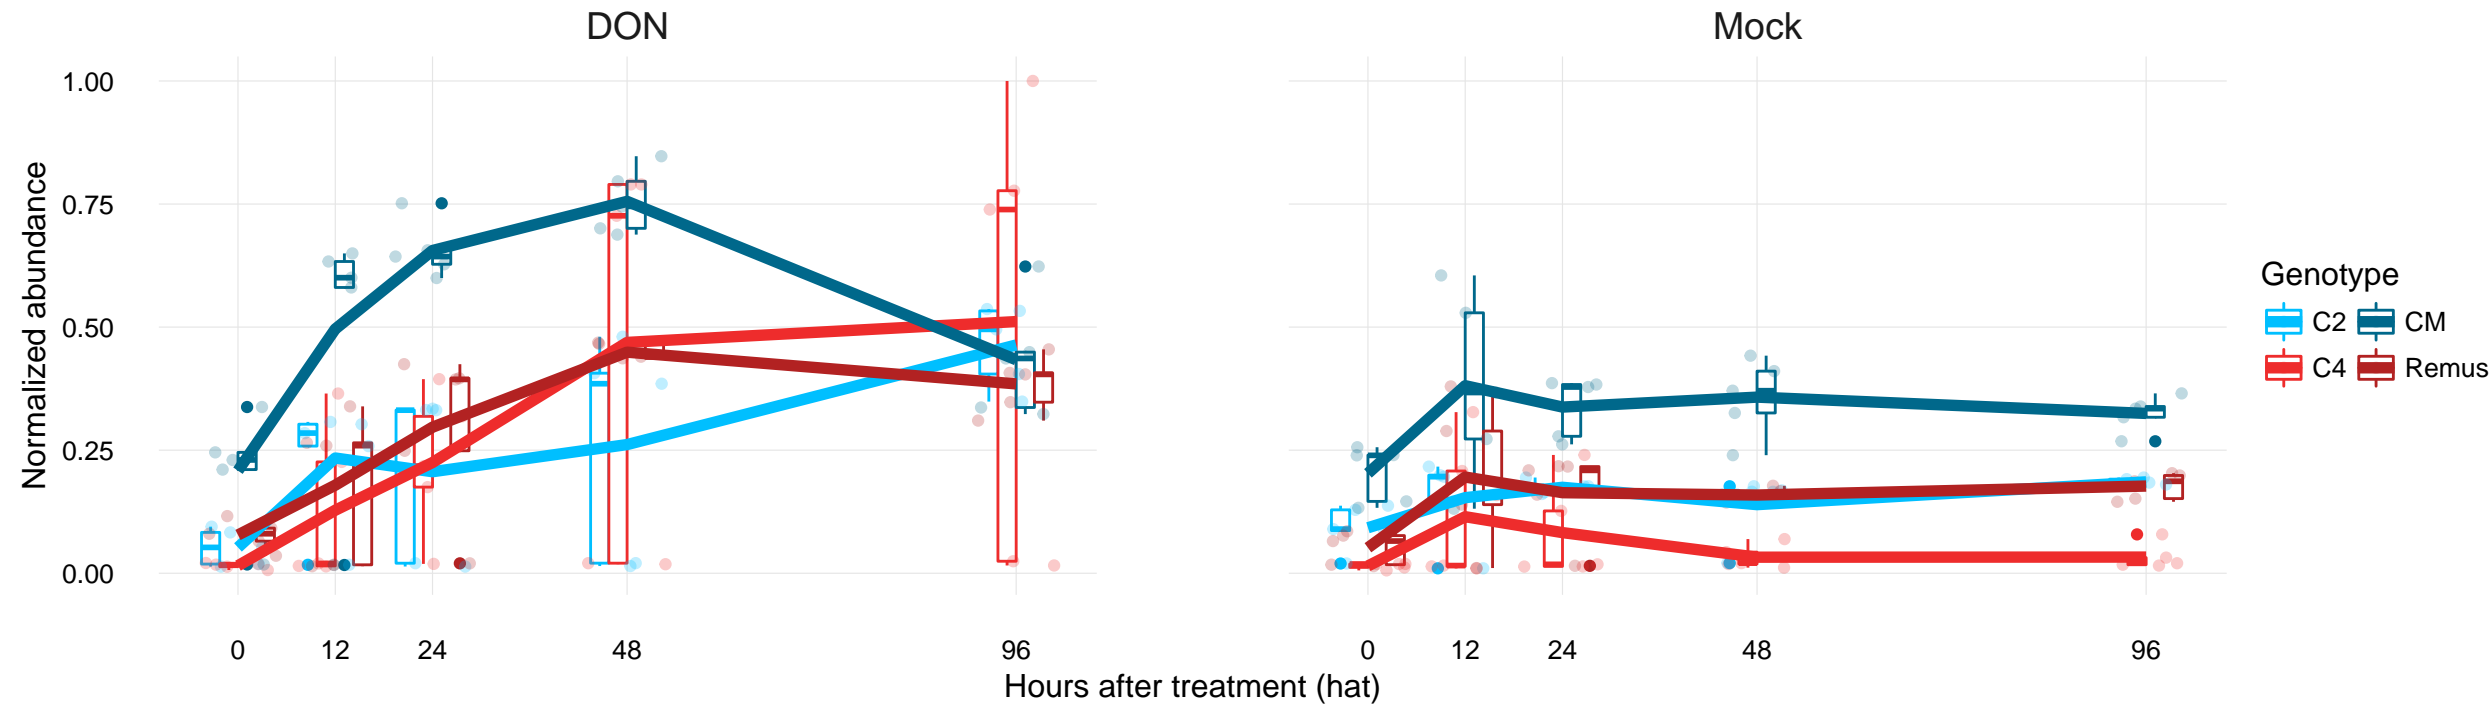



# A.76

Annotated as Putative benzoic acid derivative  
(10 database hits)

|                |                                                |
|----------------|------------------------------------------------|
| MZ             | 374.1448                                       |
| RT             | 14 min                                         |
| Normalization  | Indirectly via surrogate<br>in the KPX samples |
| Cluster        | –                                              |
| Cn total / Phe | 16 / 7                                         |

## C2, C4; different treatments

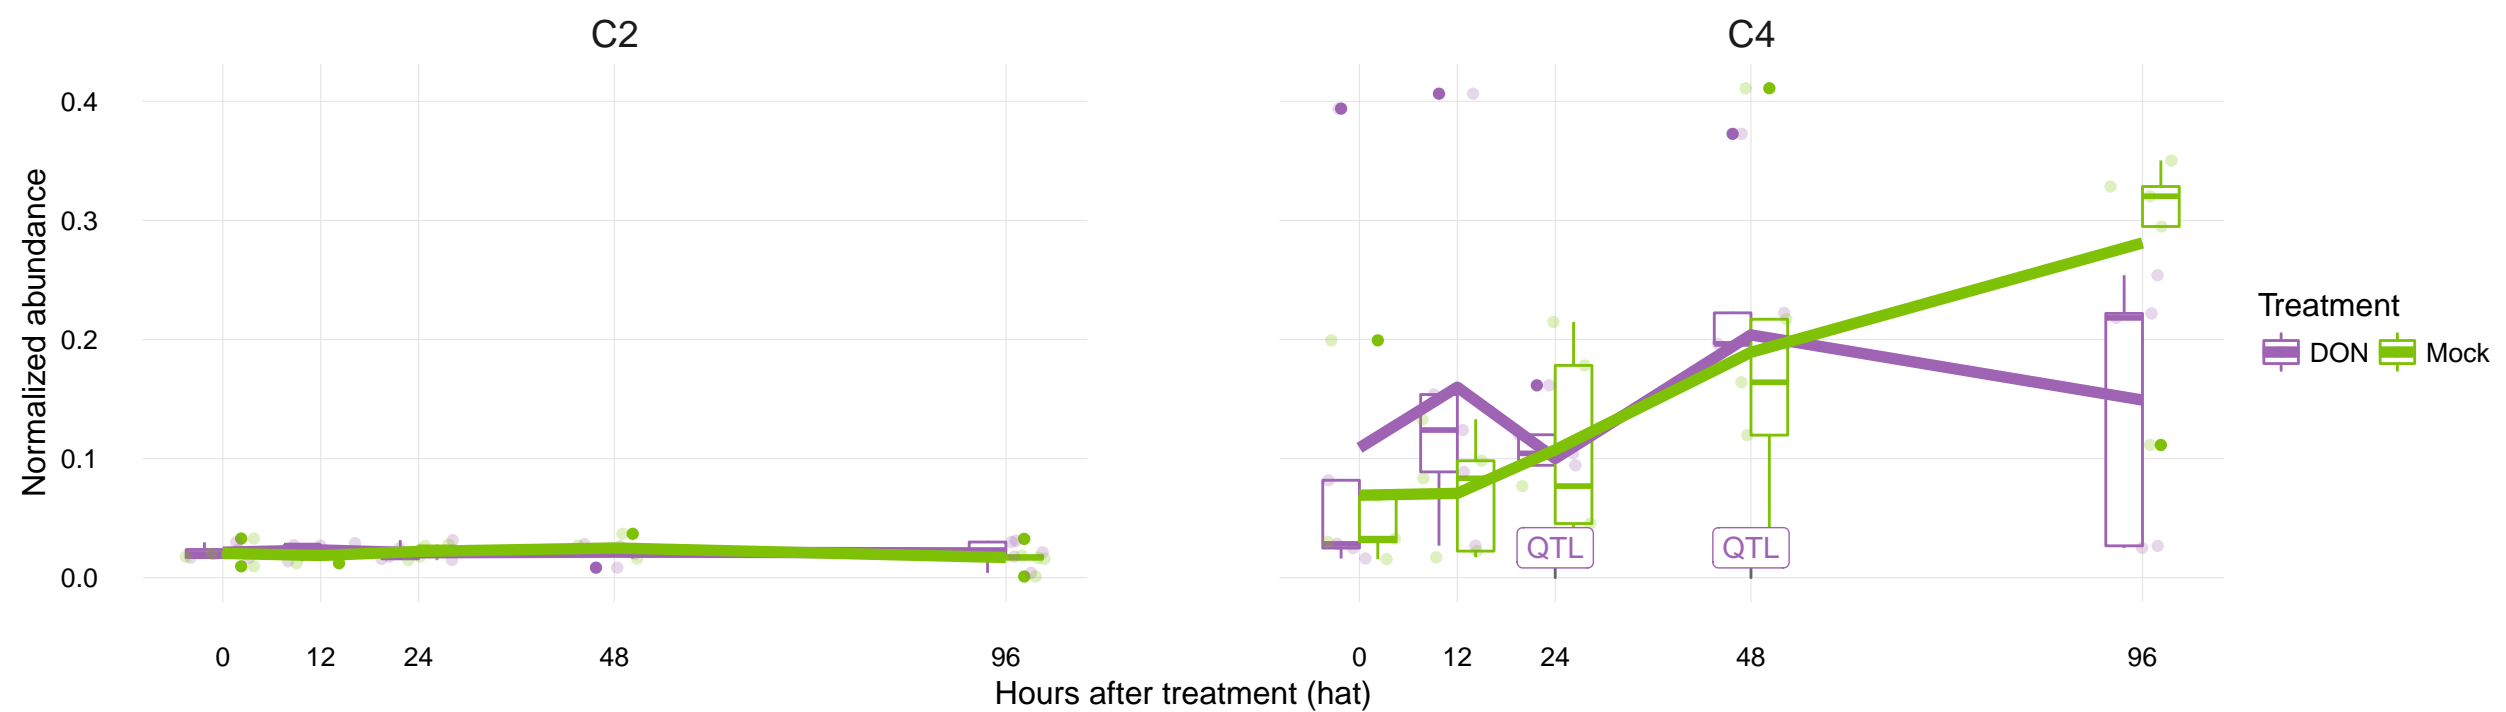

## DON, Mock; different genotypes

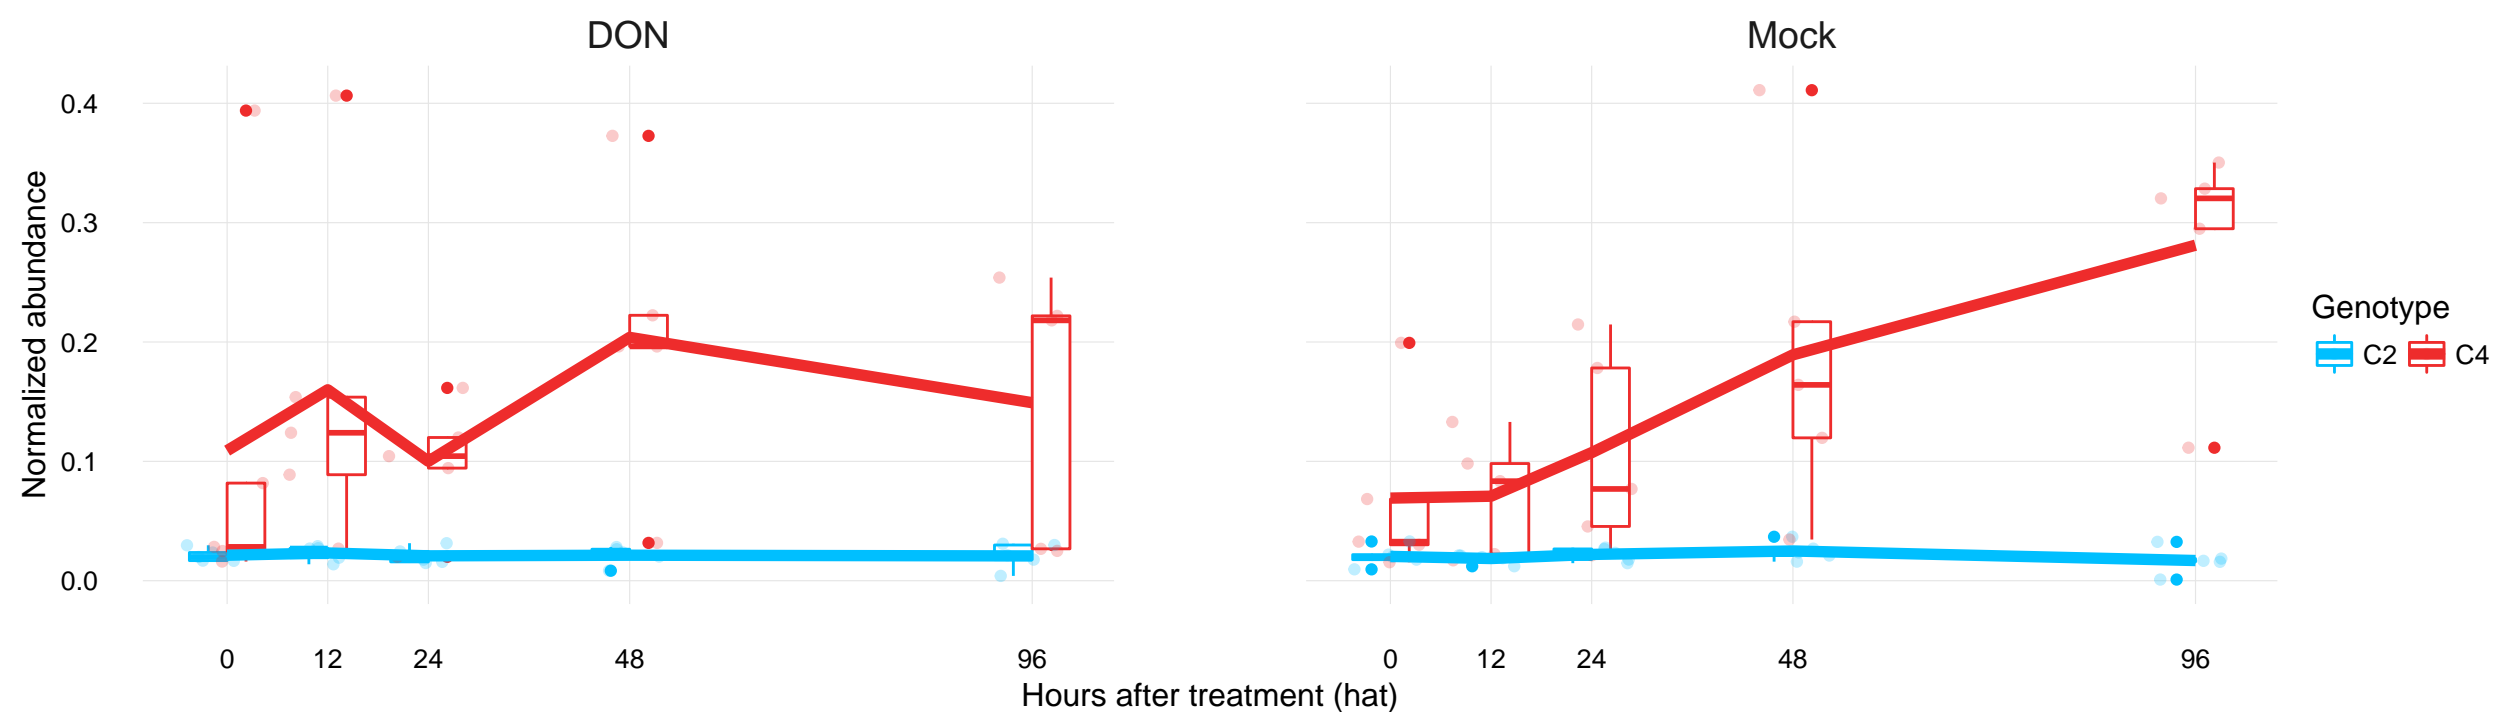

## CM, Remus; different treatments

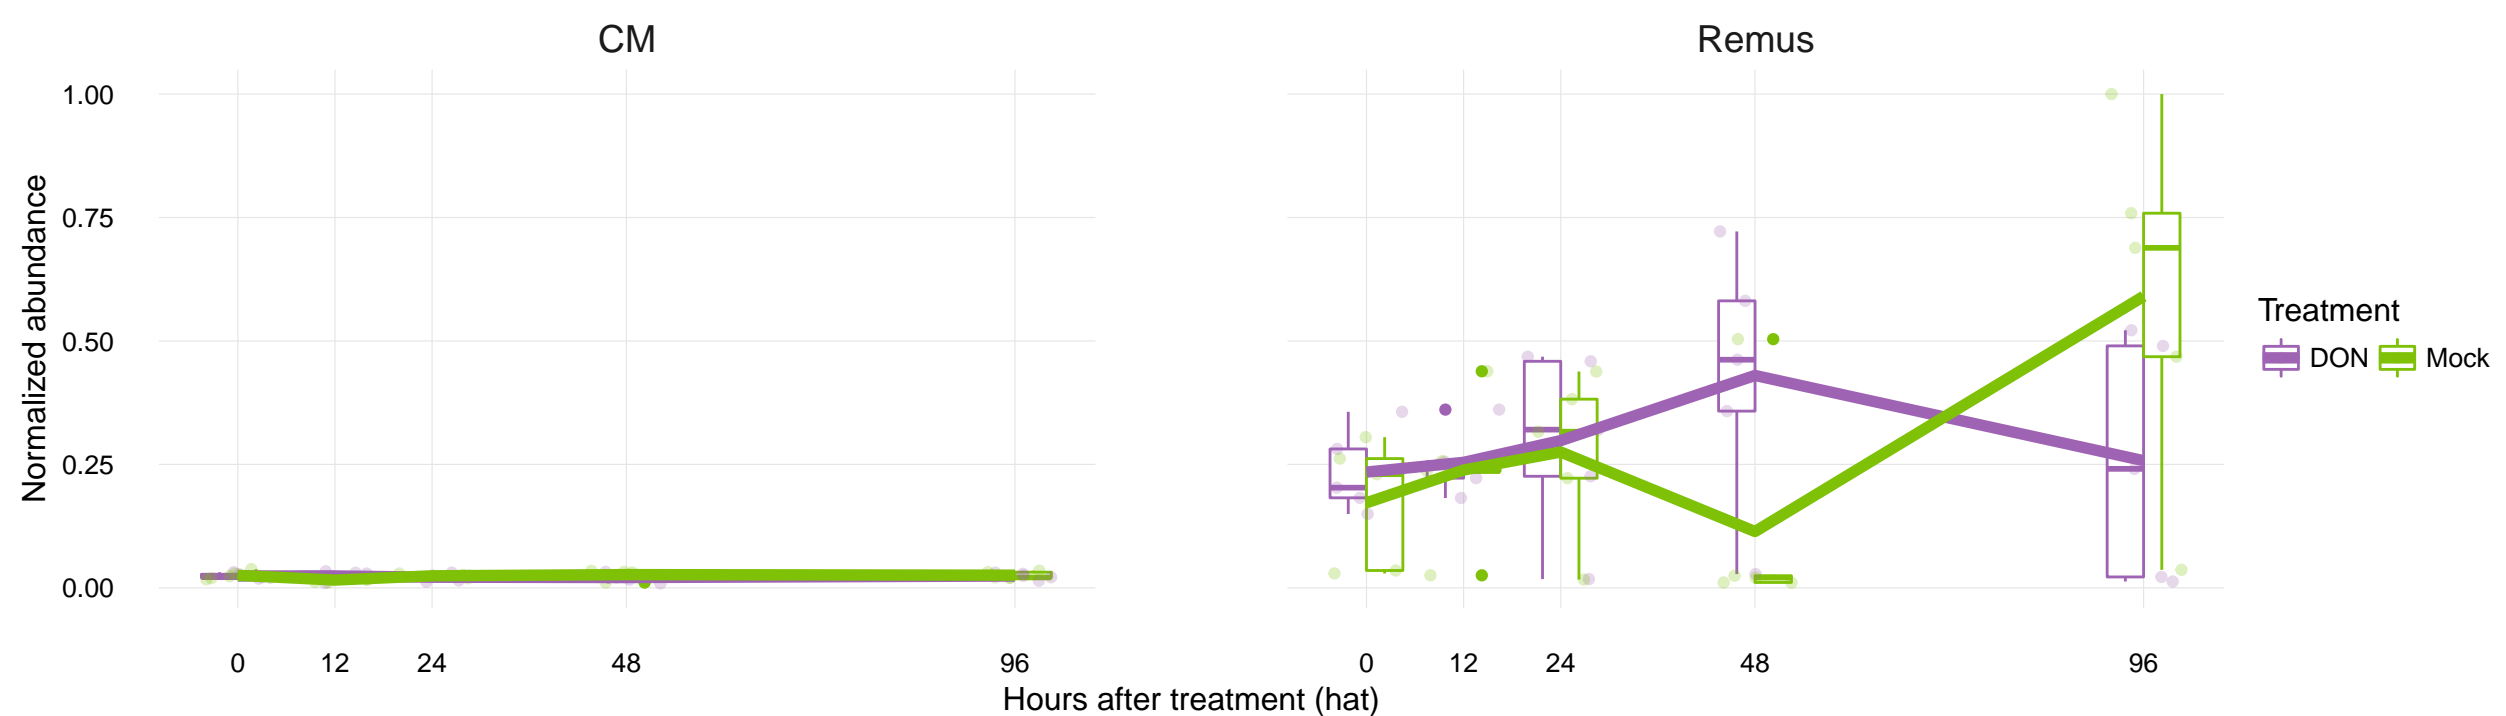

## DON, Mock; all four genotypes

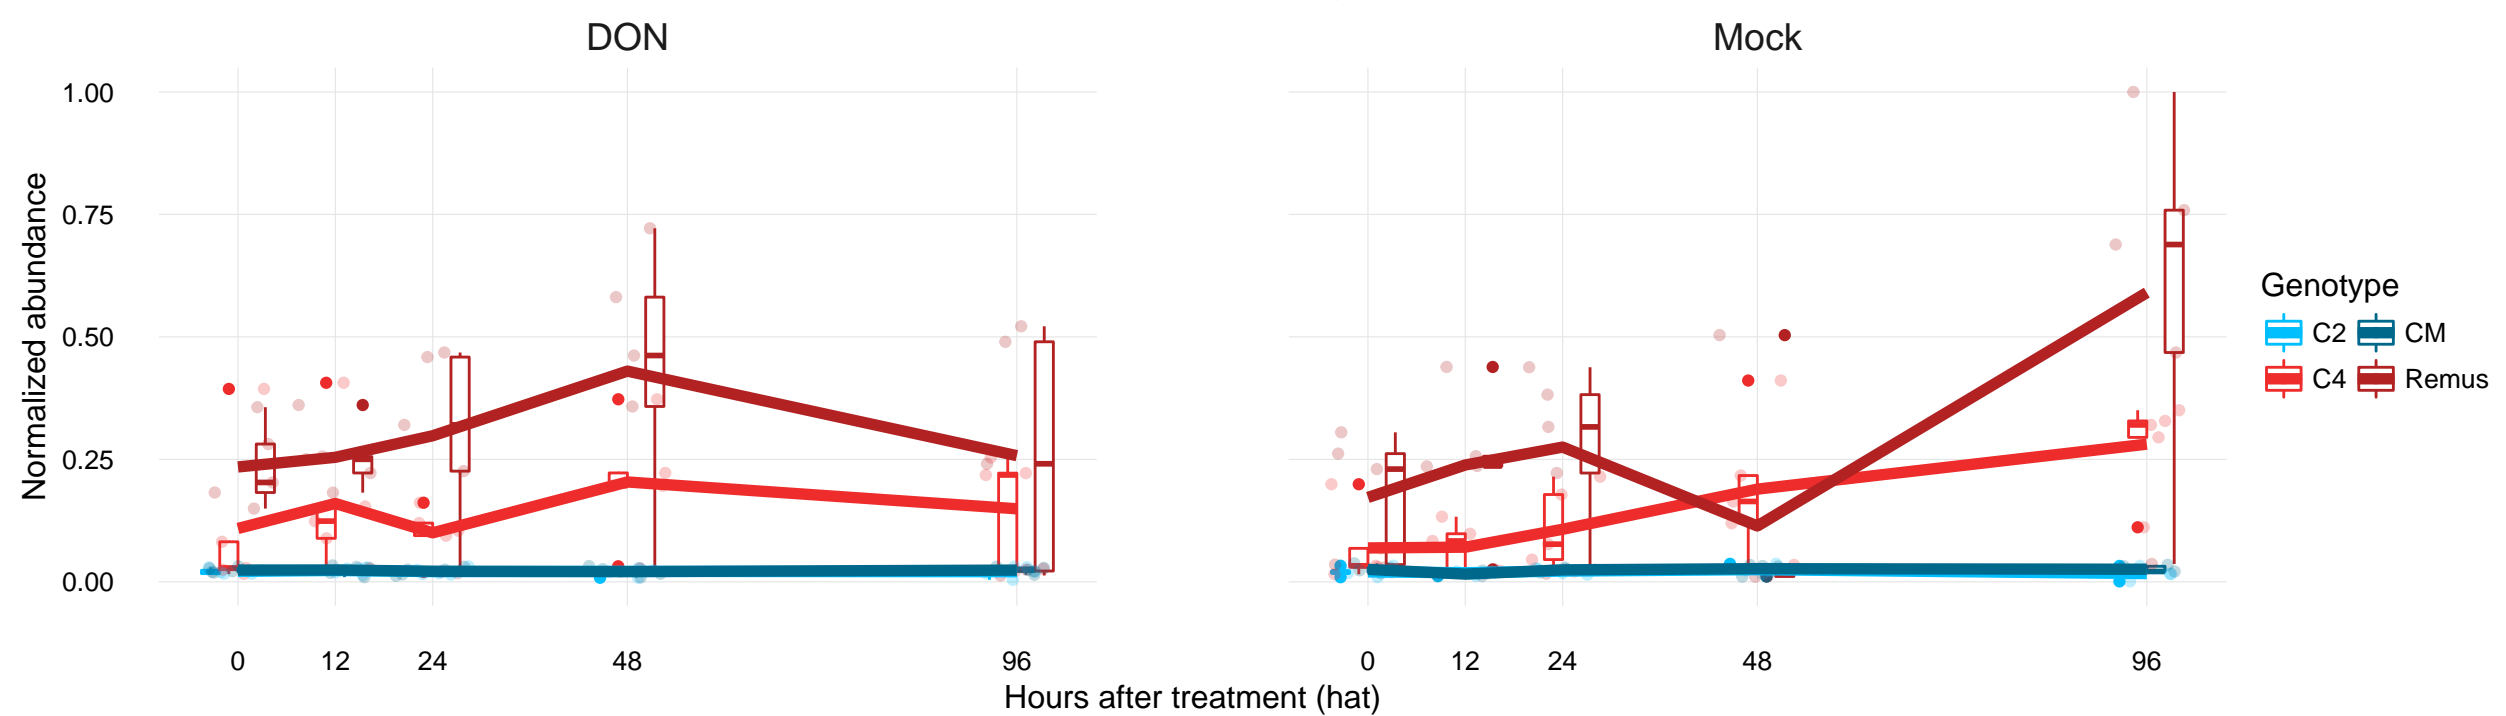

# A.27

Annotated as HCA derivative  
(1 database hit)

|                |                          |
|----------------|--------------------------|
| MZ             | 395.1315                 |
| RT             | 9.19 min                 |
| Normalization  | Directly via KPX samples |
| Cluster        | –                        |
| Cn total / Phe | 17 /                     |

## C2, C4; different treatments

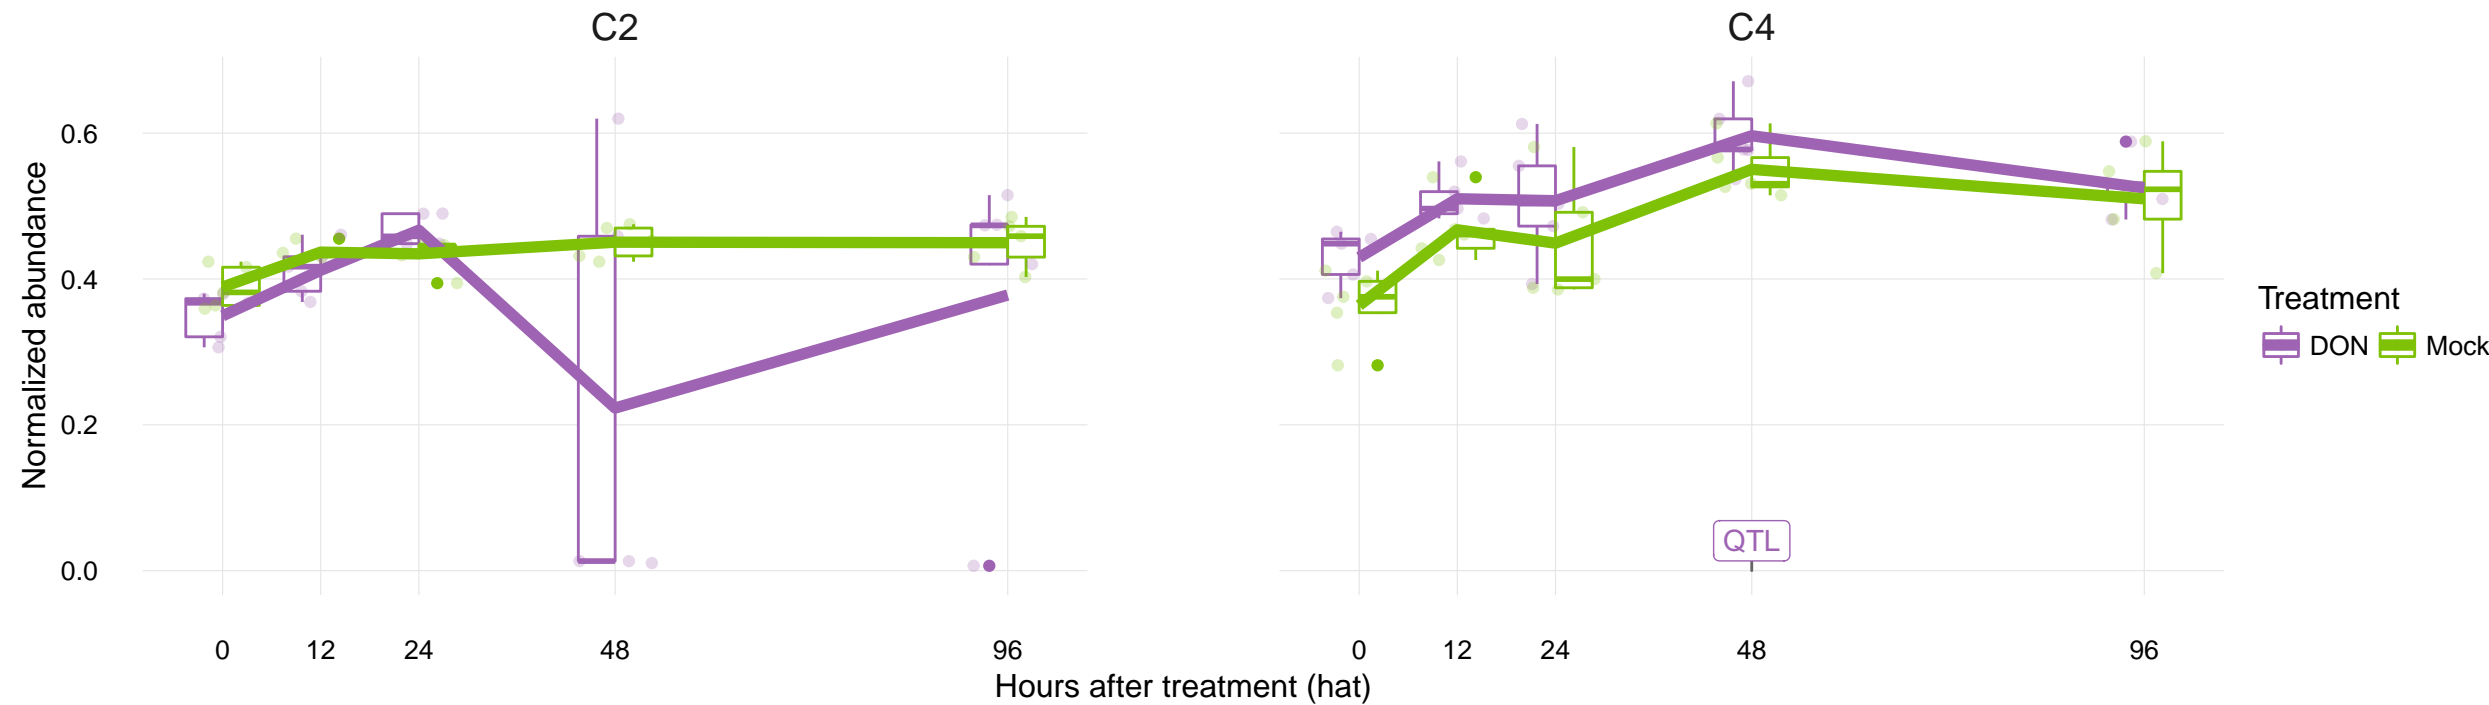

## DON, Mock; different genotypes

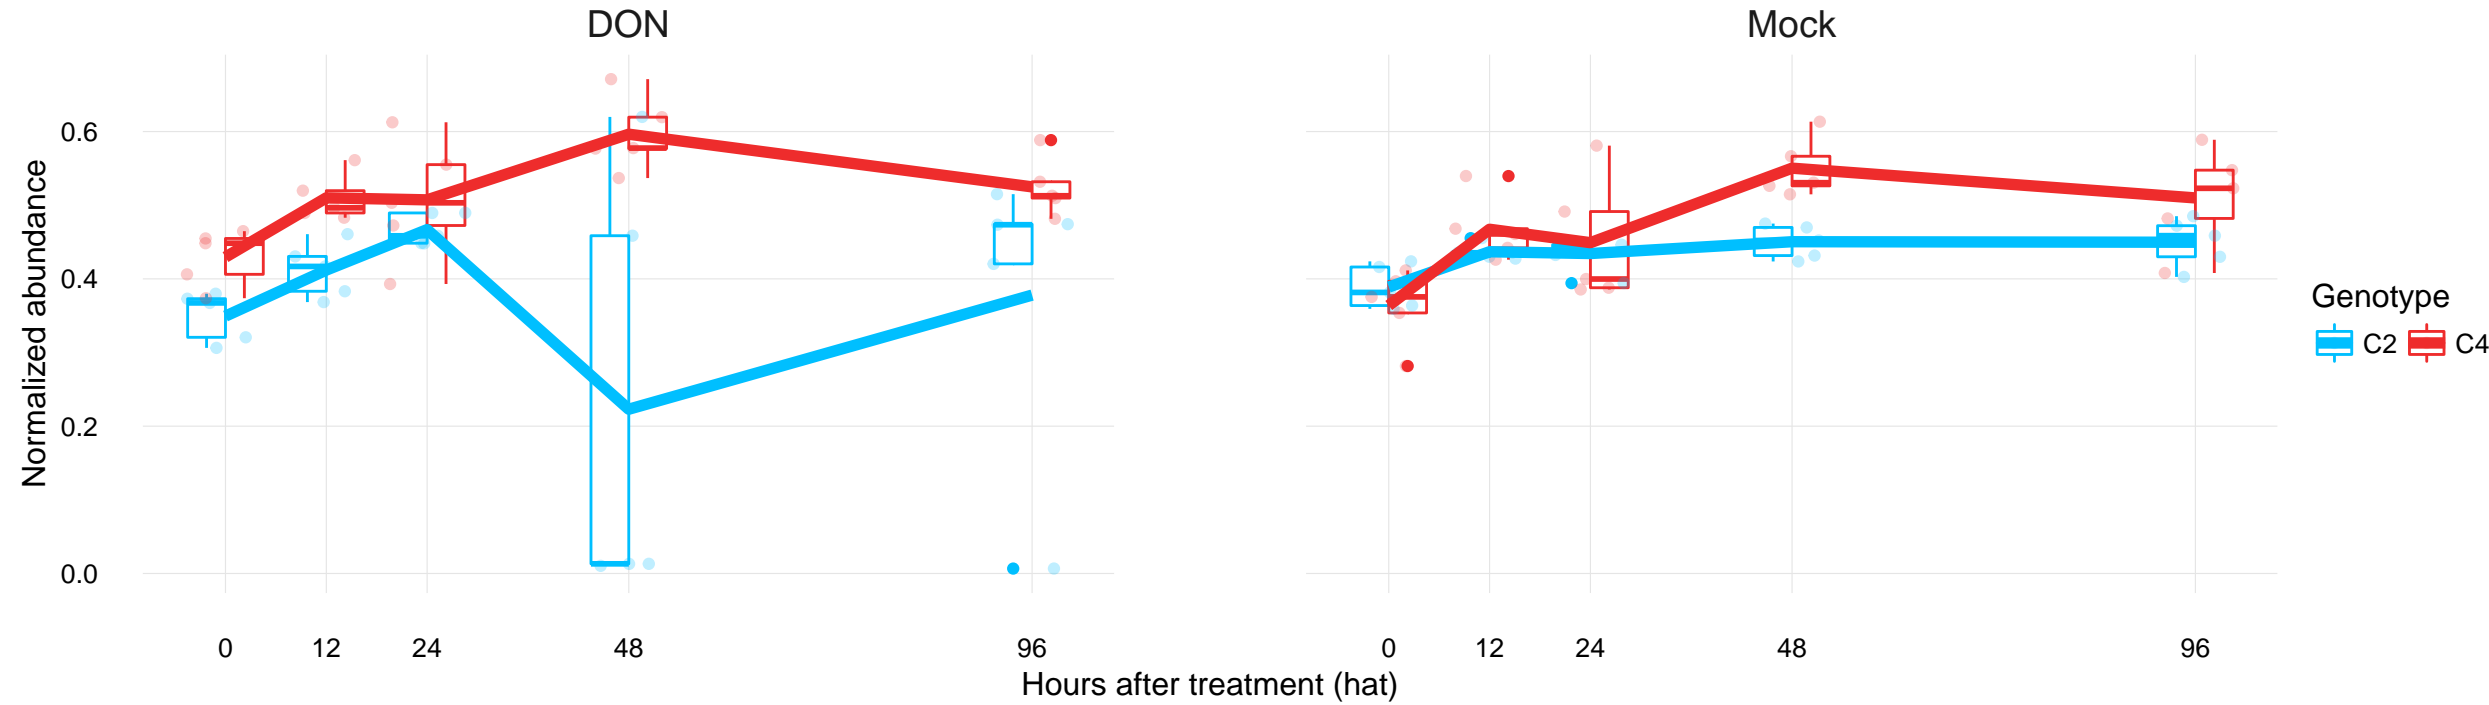

## CM, Remus; different treatments

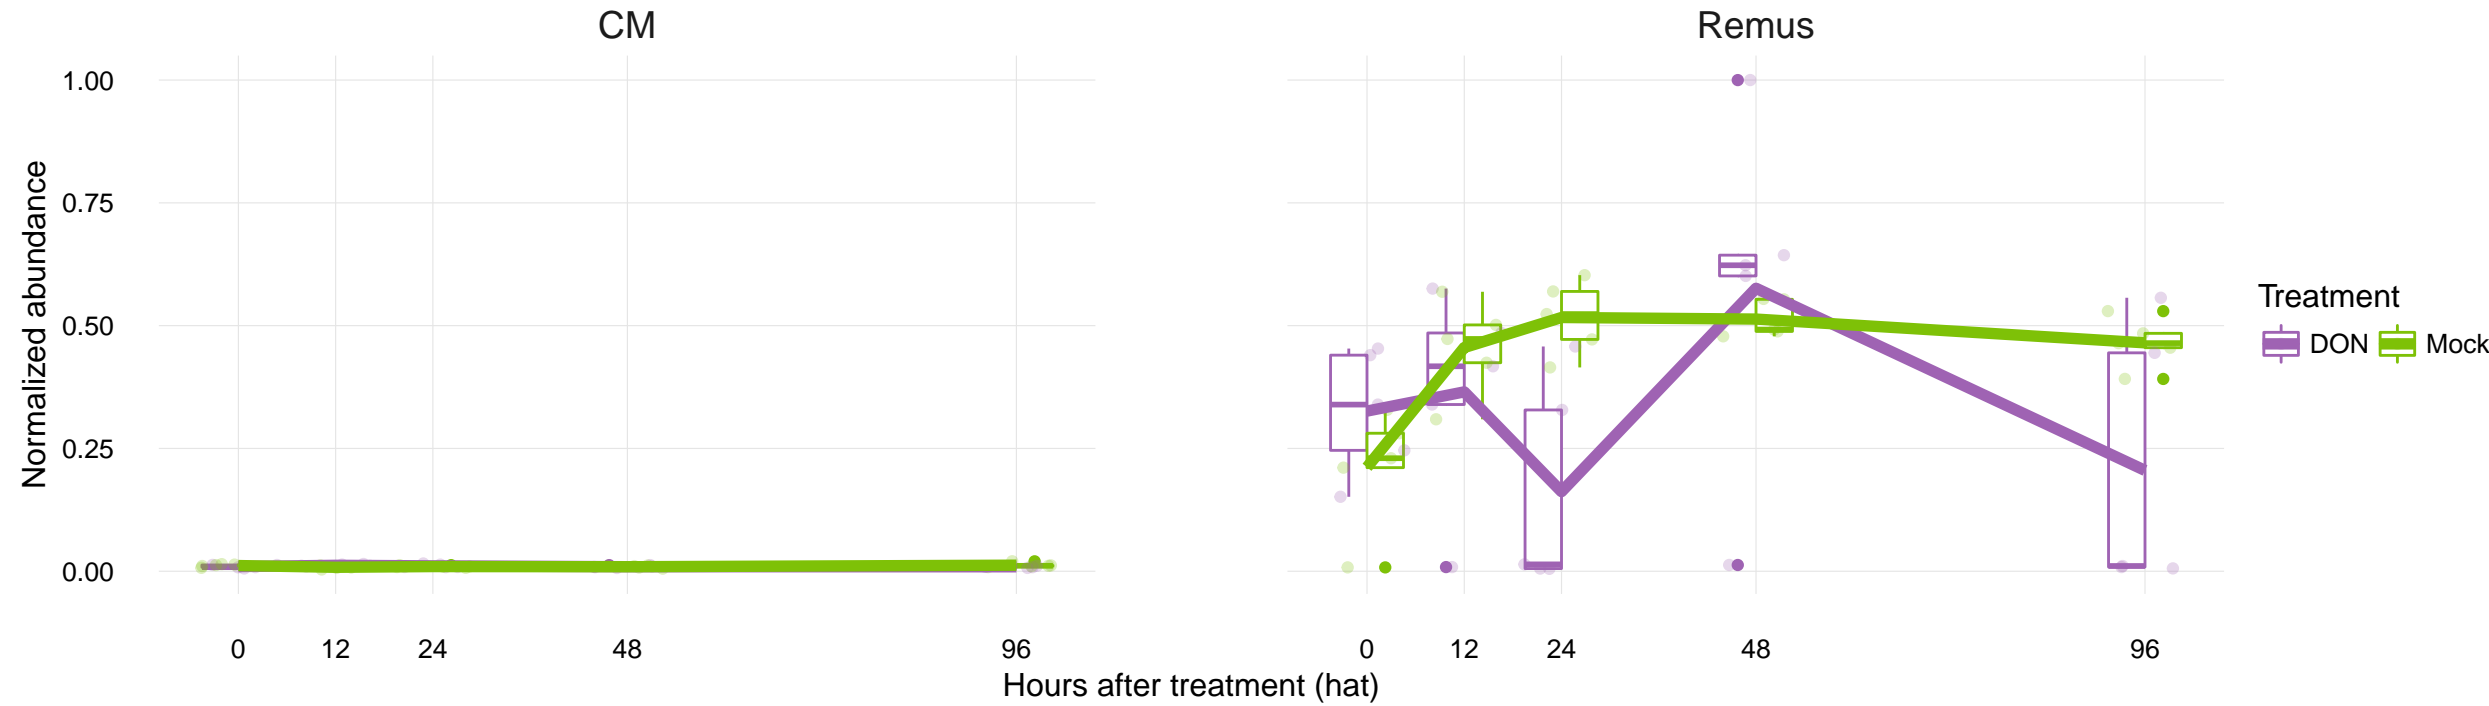

## DON, Mock; all four genotypes

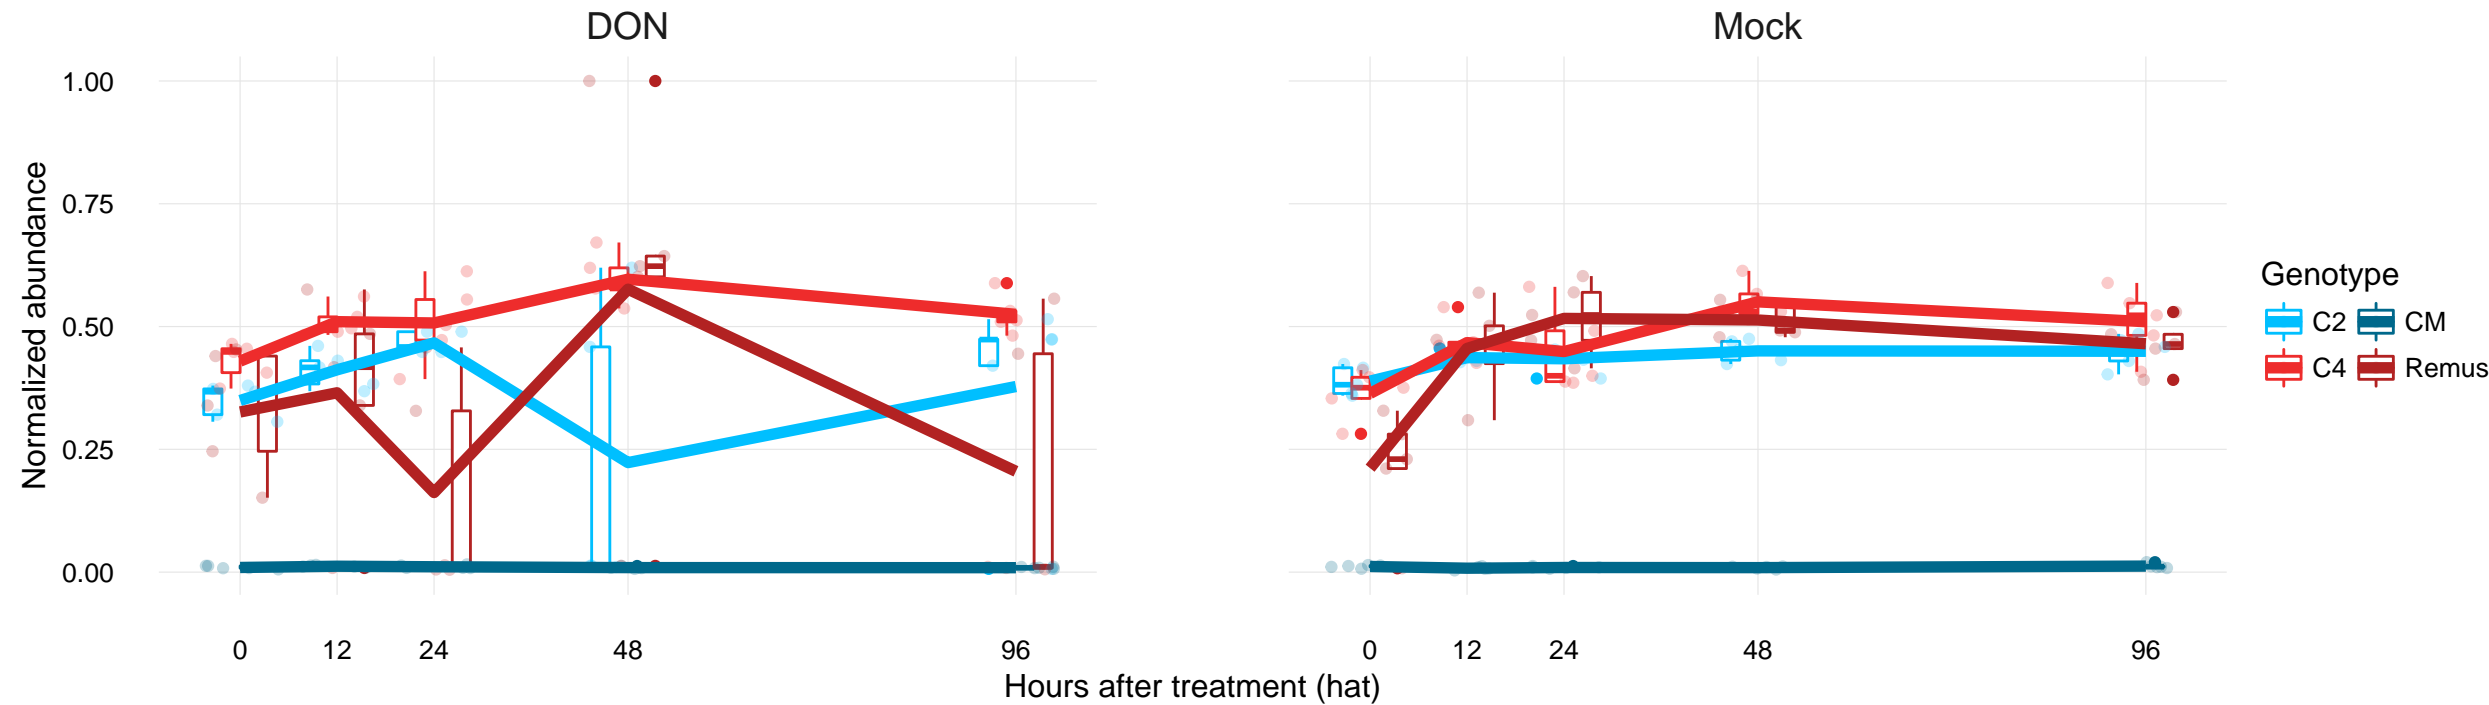

# U.3

Unknown Phe-derived wheat-metabolite

|                |                          |
|----------------|--------------------------|
| MZ             | 768.2427                 |
| RT             | 9.6 min                  |
| Normalization  | Directly via KPX samples |
| Cluster        | –                        |
| Cn total / Phe | 9 / 9                    |

C2, C4; different treatments

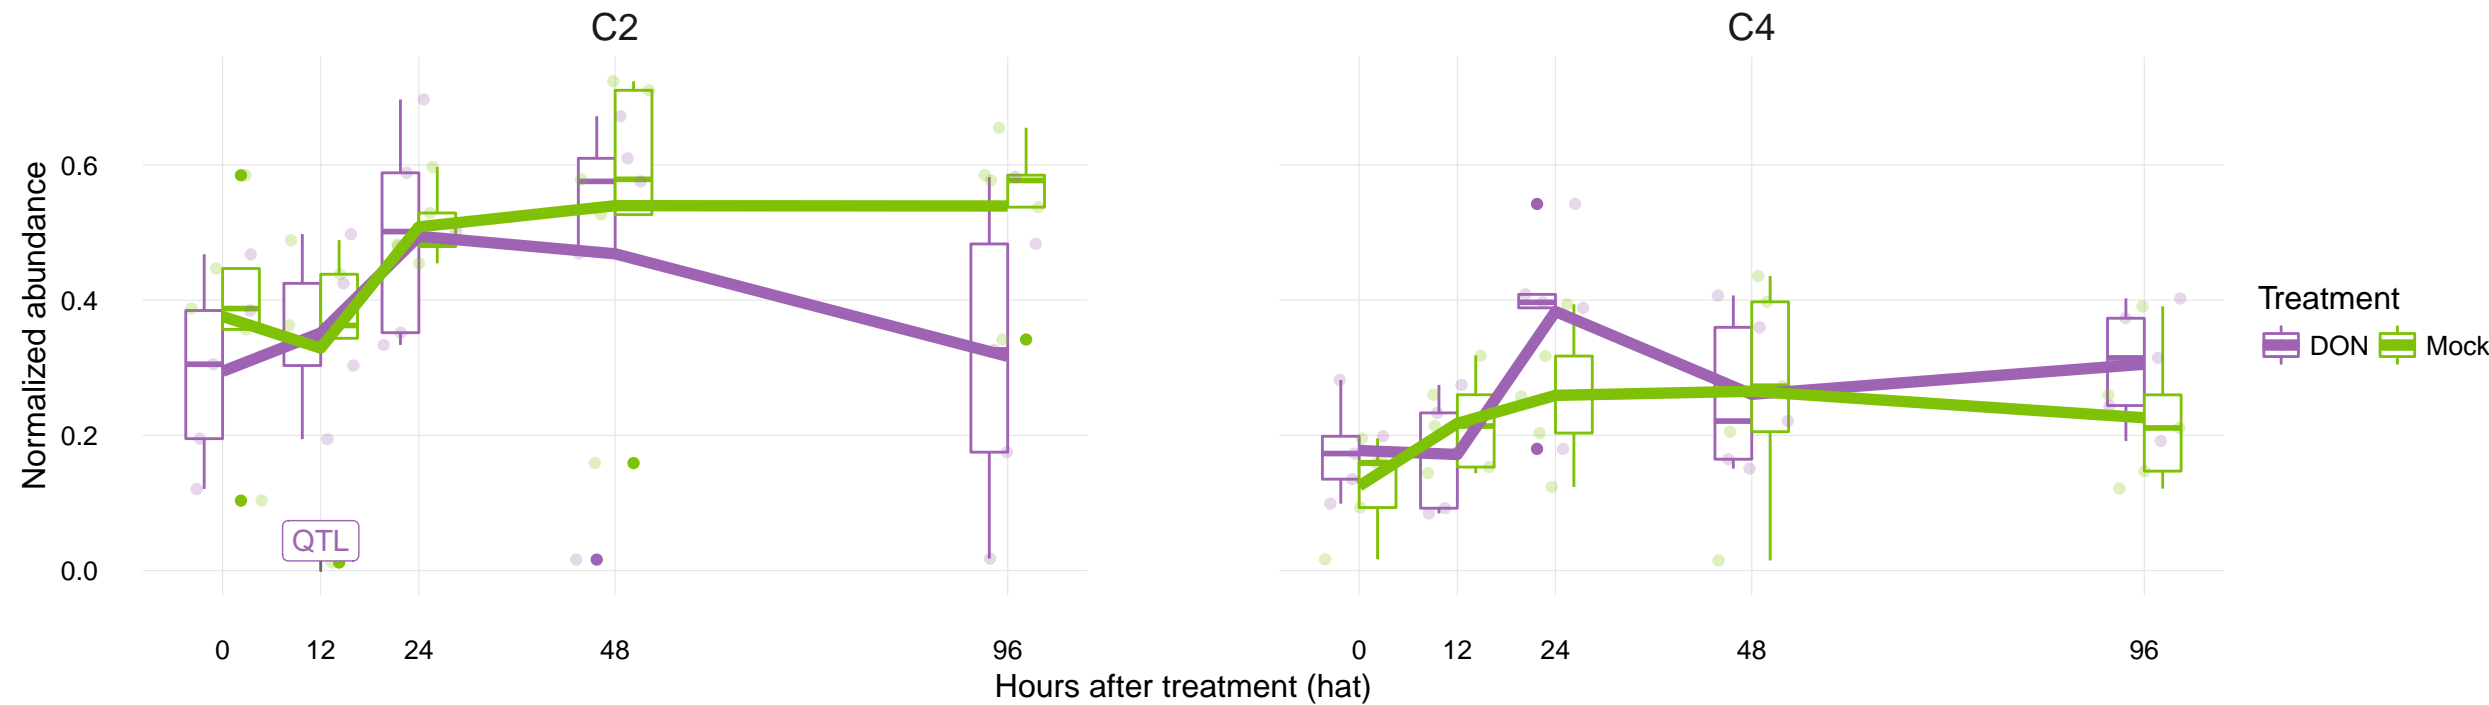

DON, Mock; different genotypes

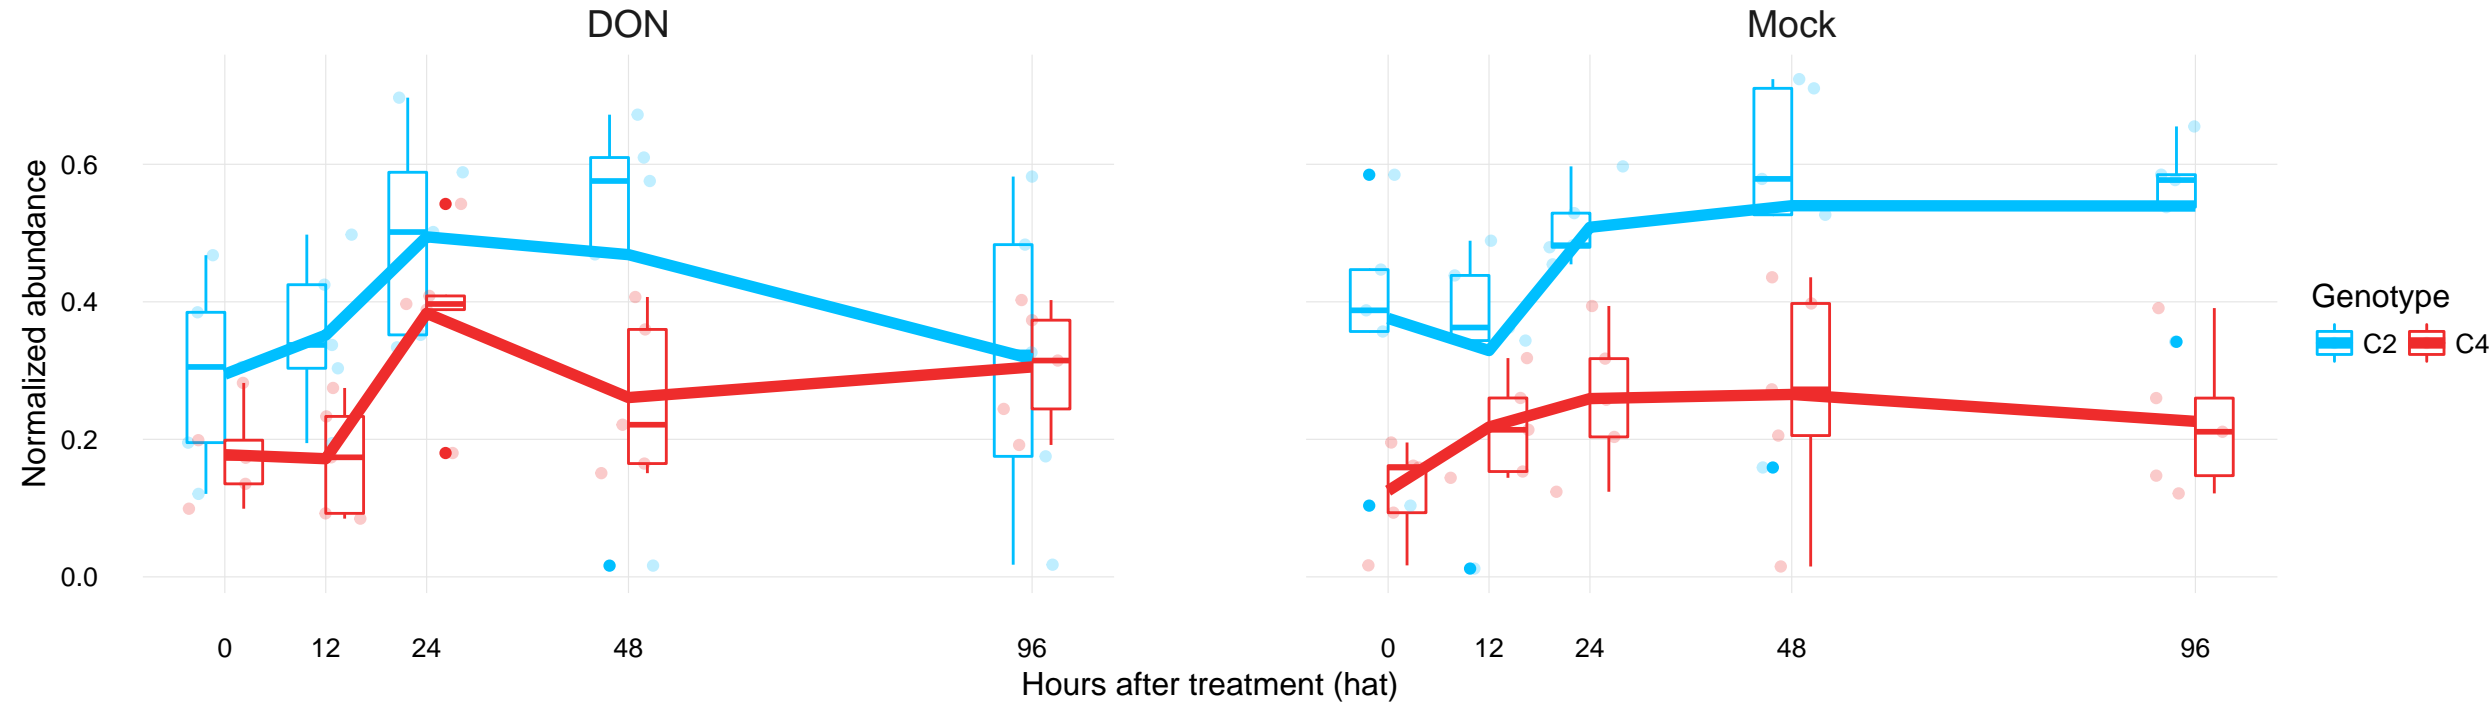

CM, Remus; different treatments

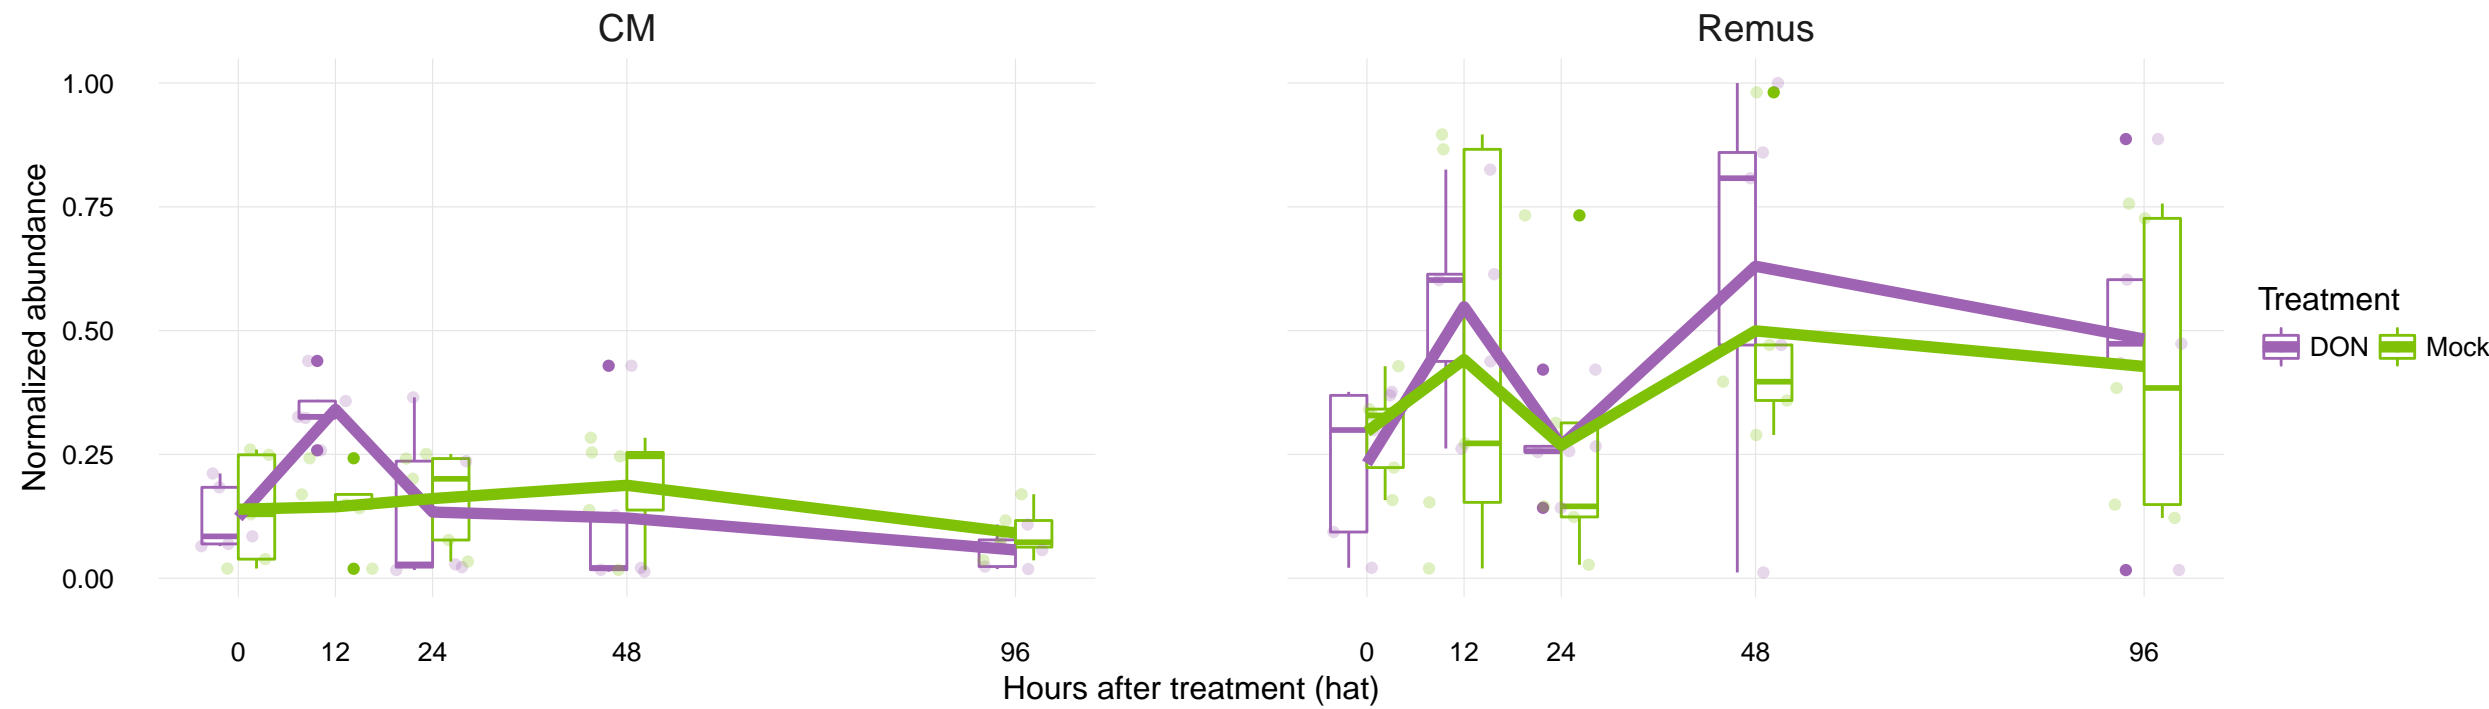

DON, Mock; all four genotypes

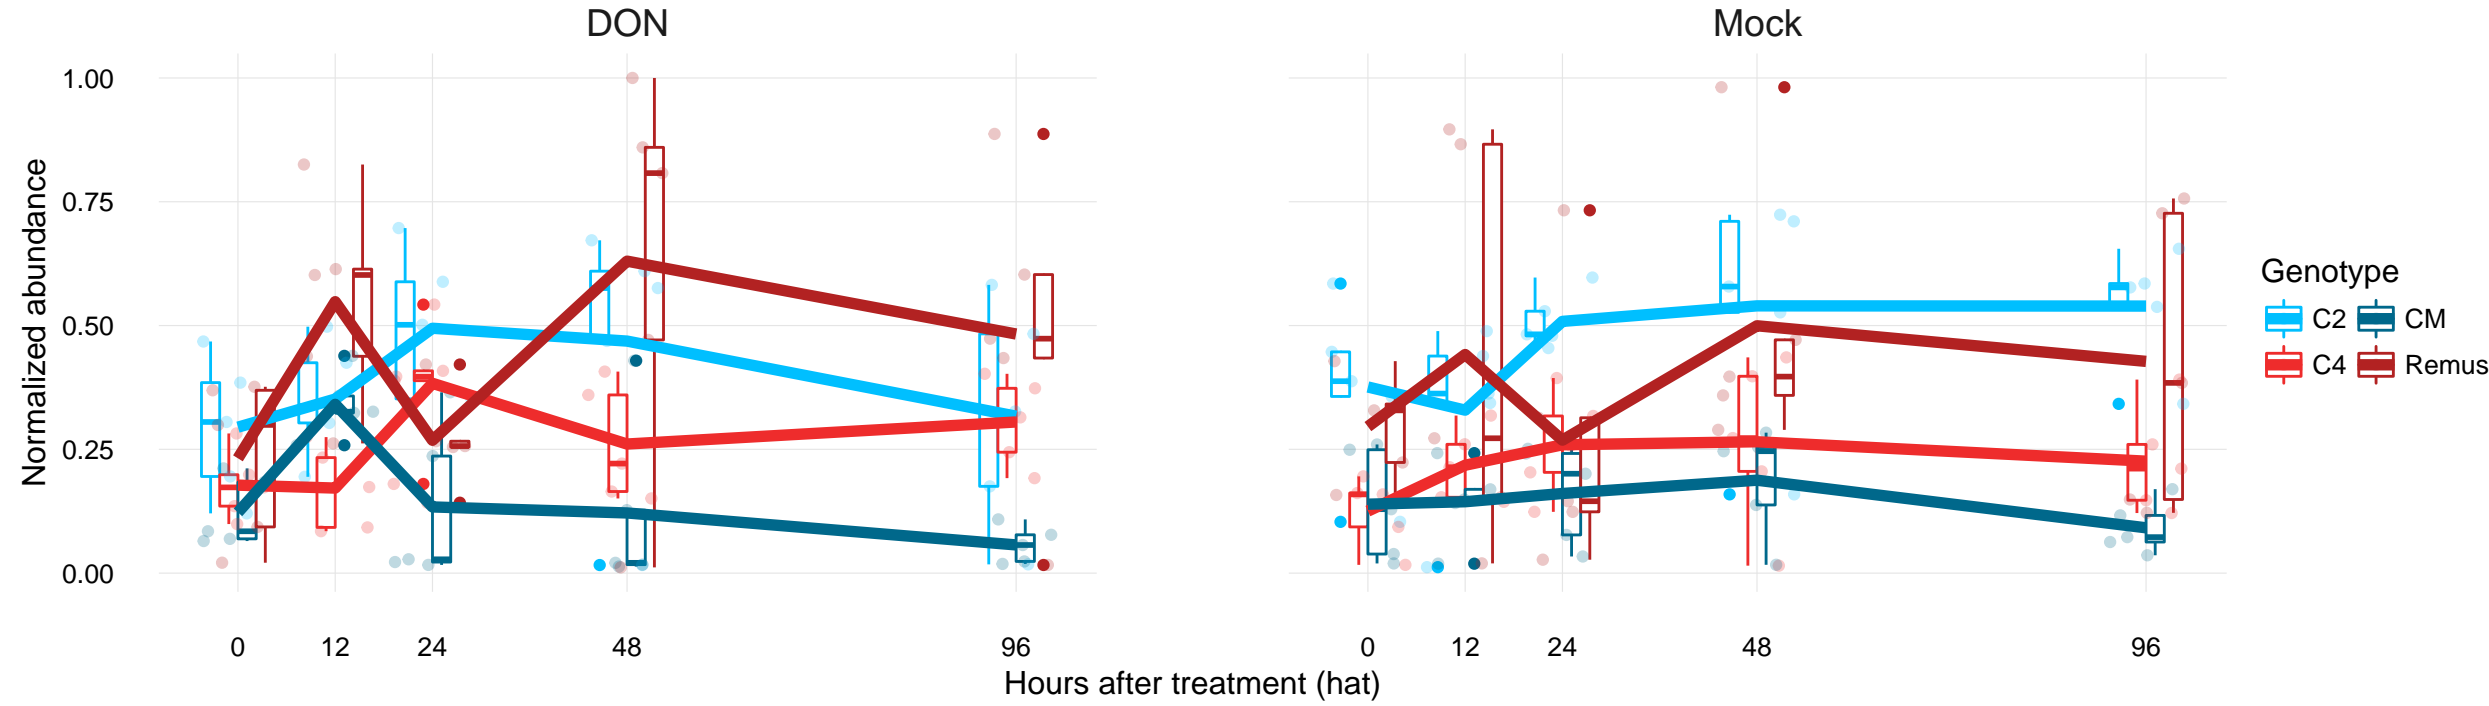

# A.26

Annotated as HCA derivative  
(7 database hits)

|                |                          |
|----------------|--------------------------|
| MZ             | 167.0703                 |
| RT             | 8.99 min                 |
| Normalization  | Directly via KPX samples |
| Cluster        | –                        |
| Cn total / Phe | 9 /                      |

## C2, C4; different treatments

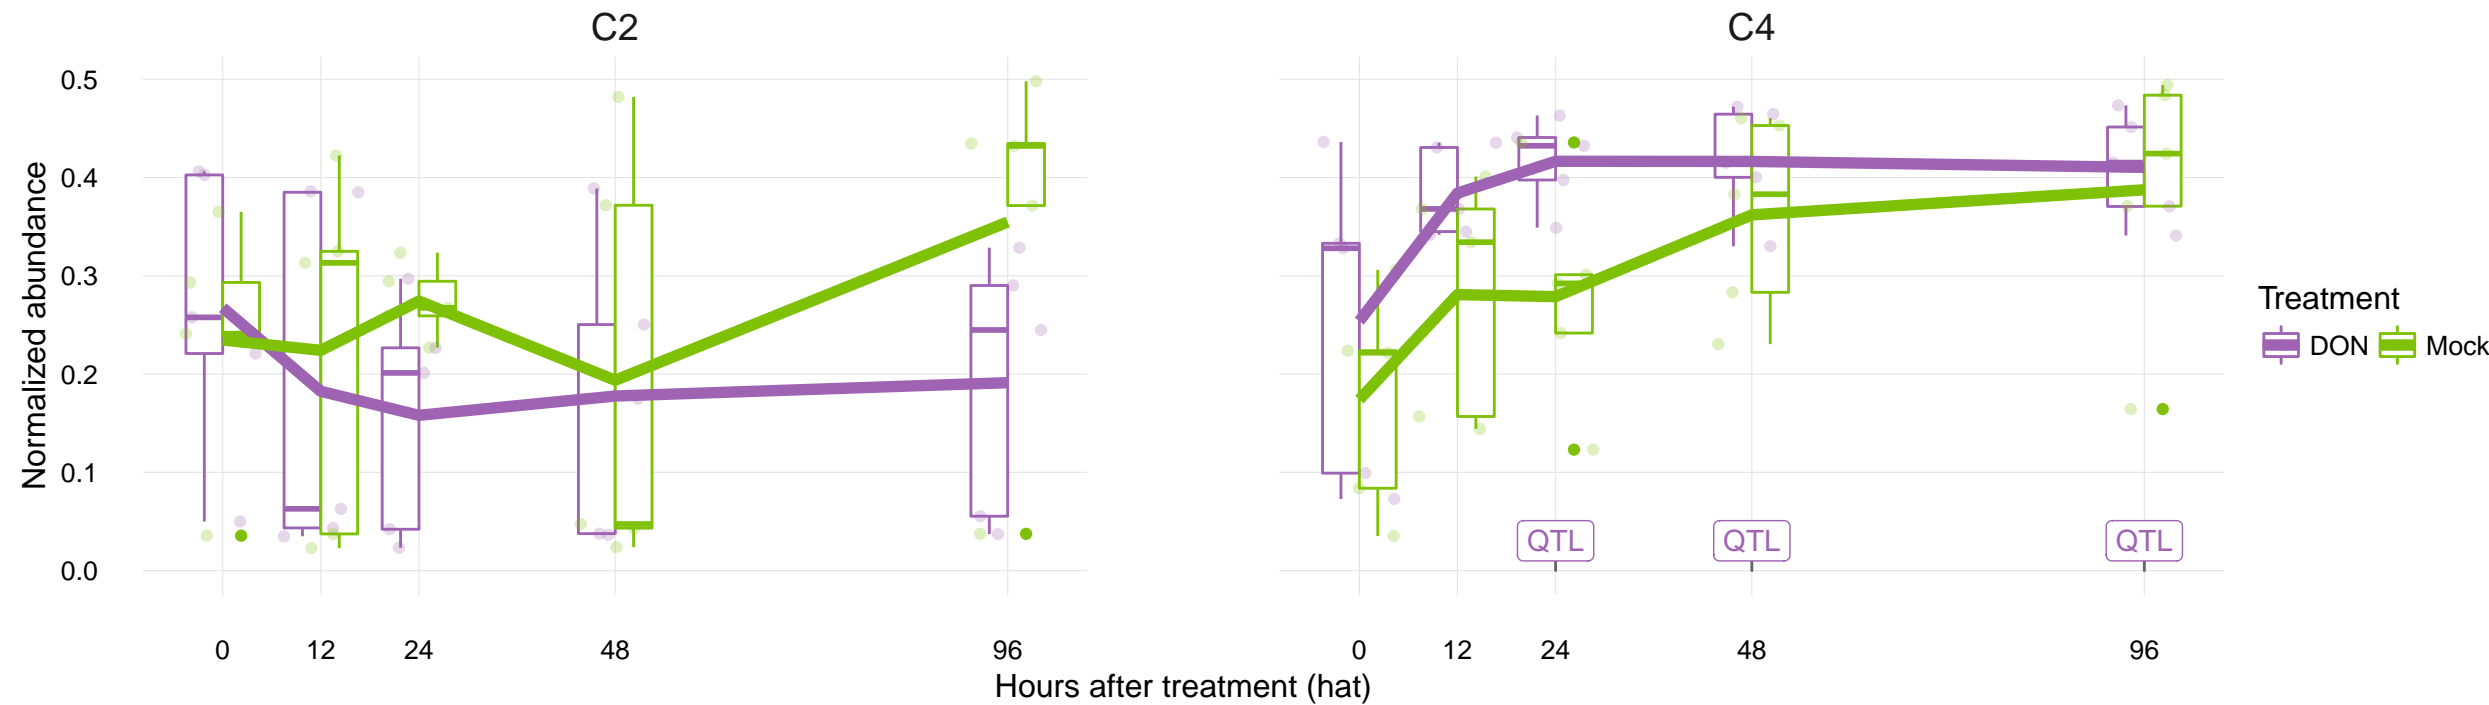

## DON, Mock; different genotypes

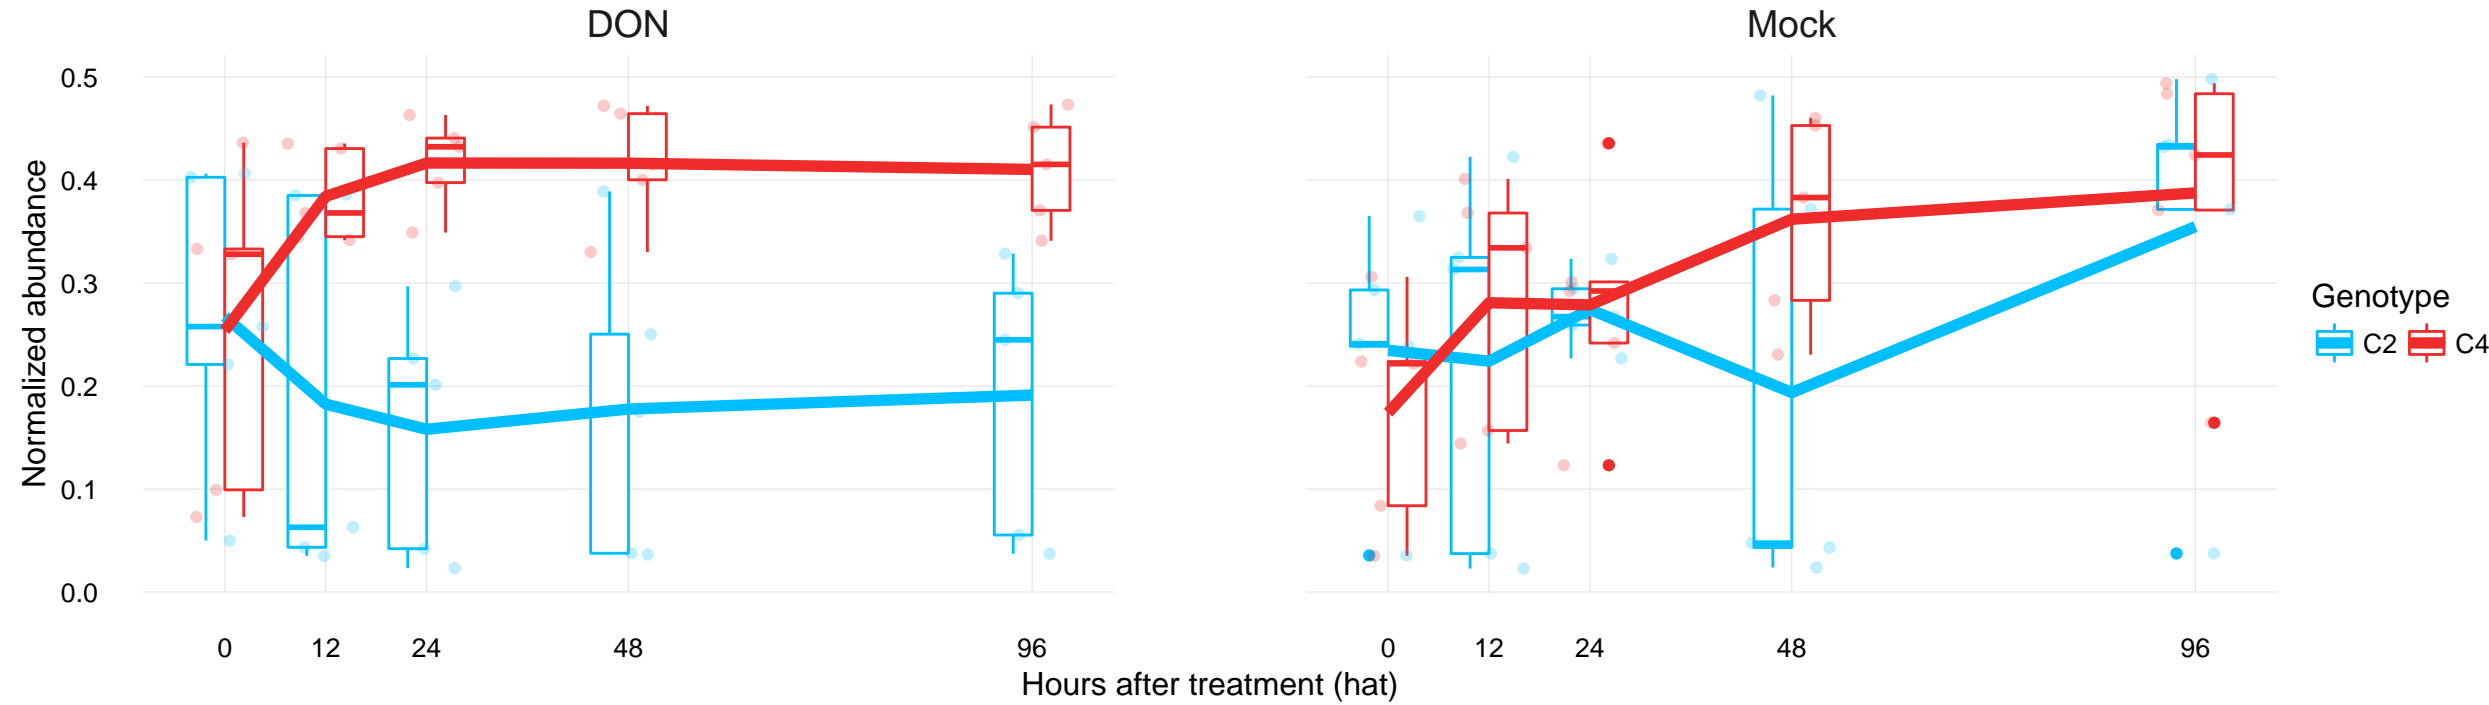

## CM, Remus; different treatments

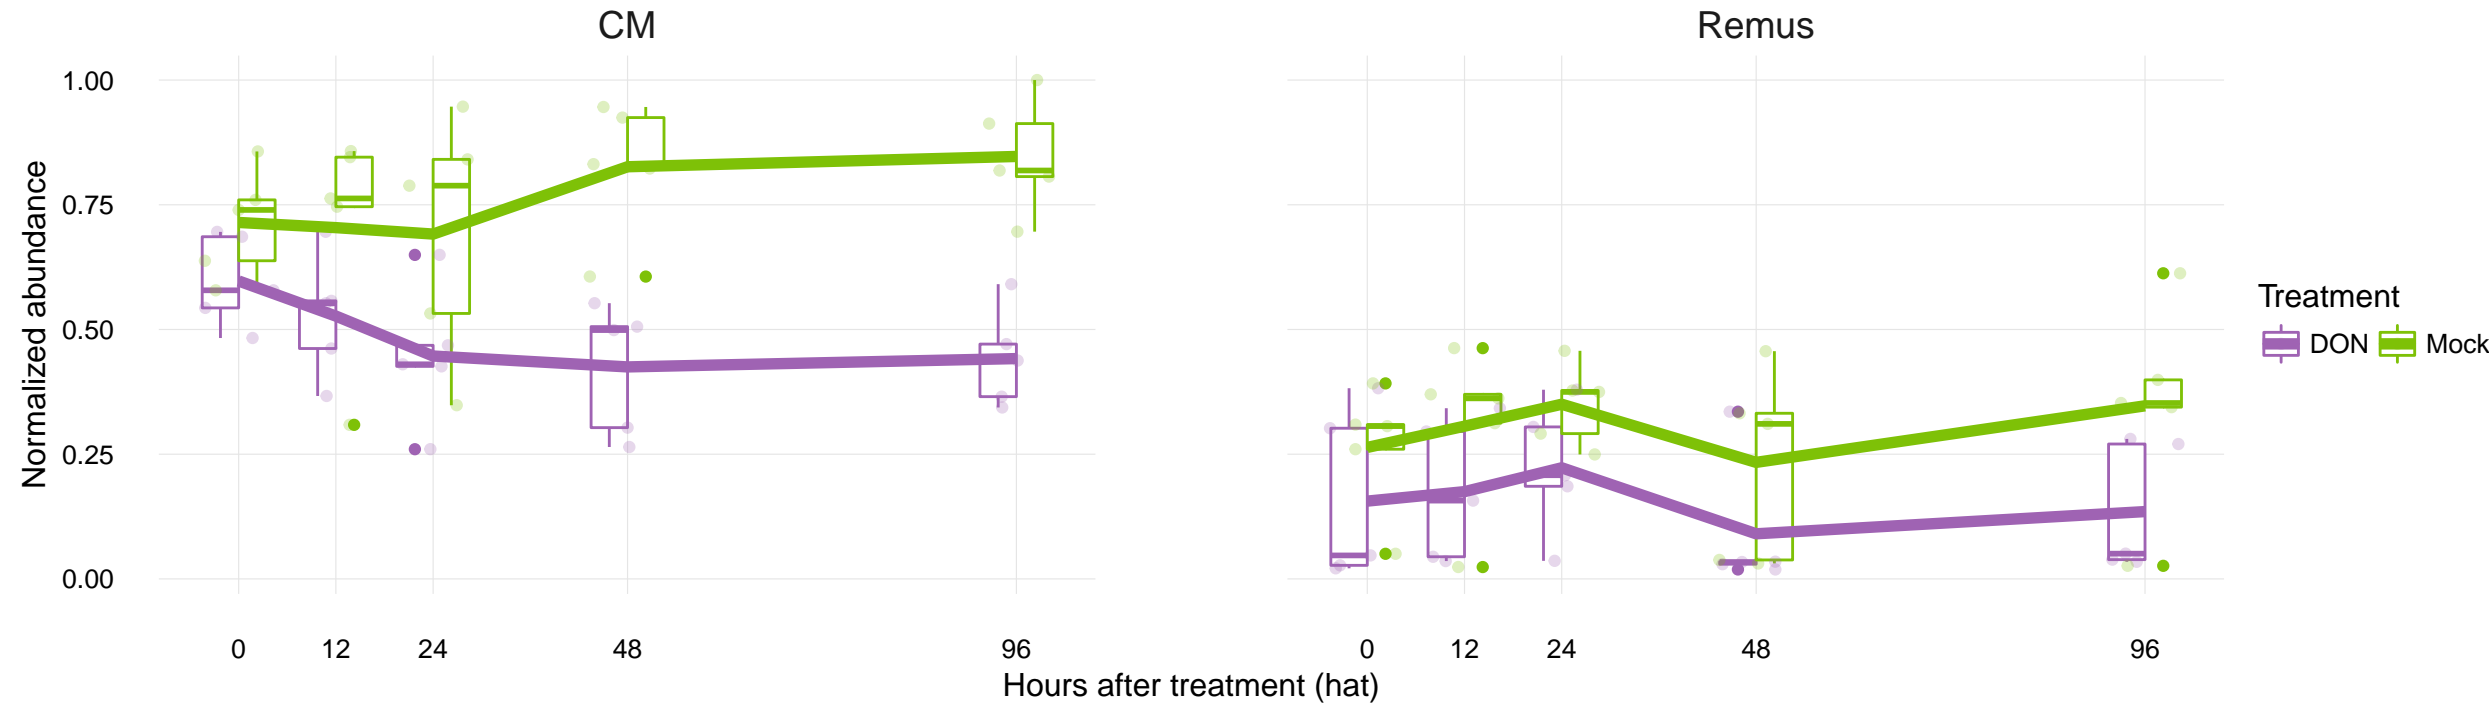

## DON, Mock; all four genotypes

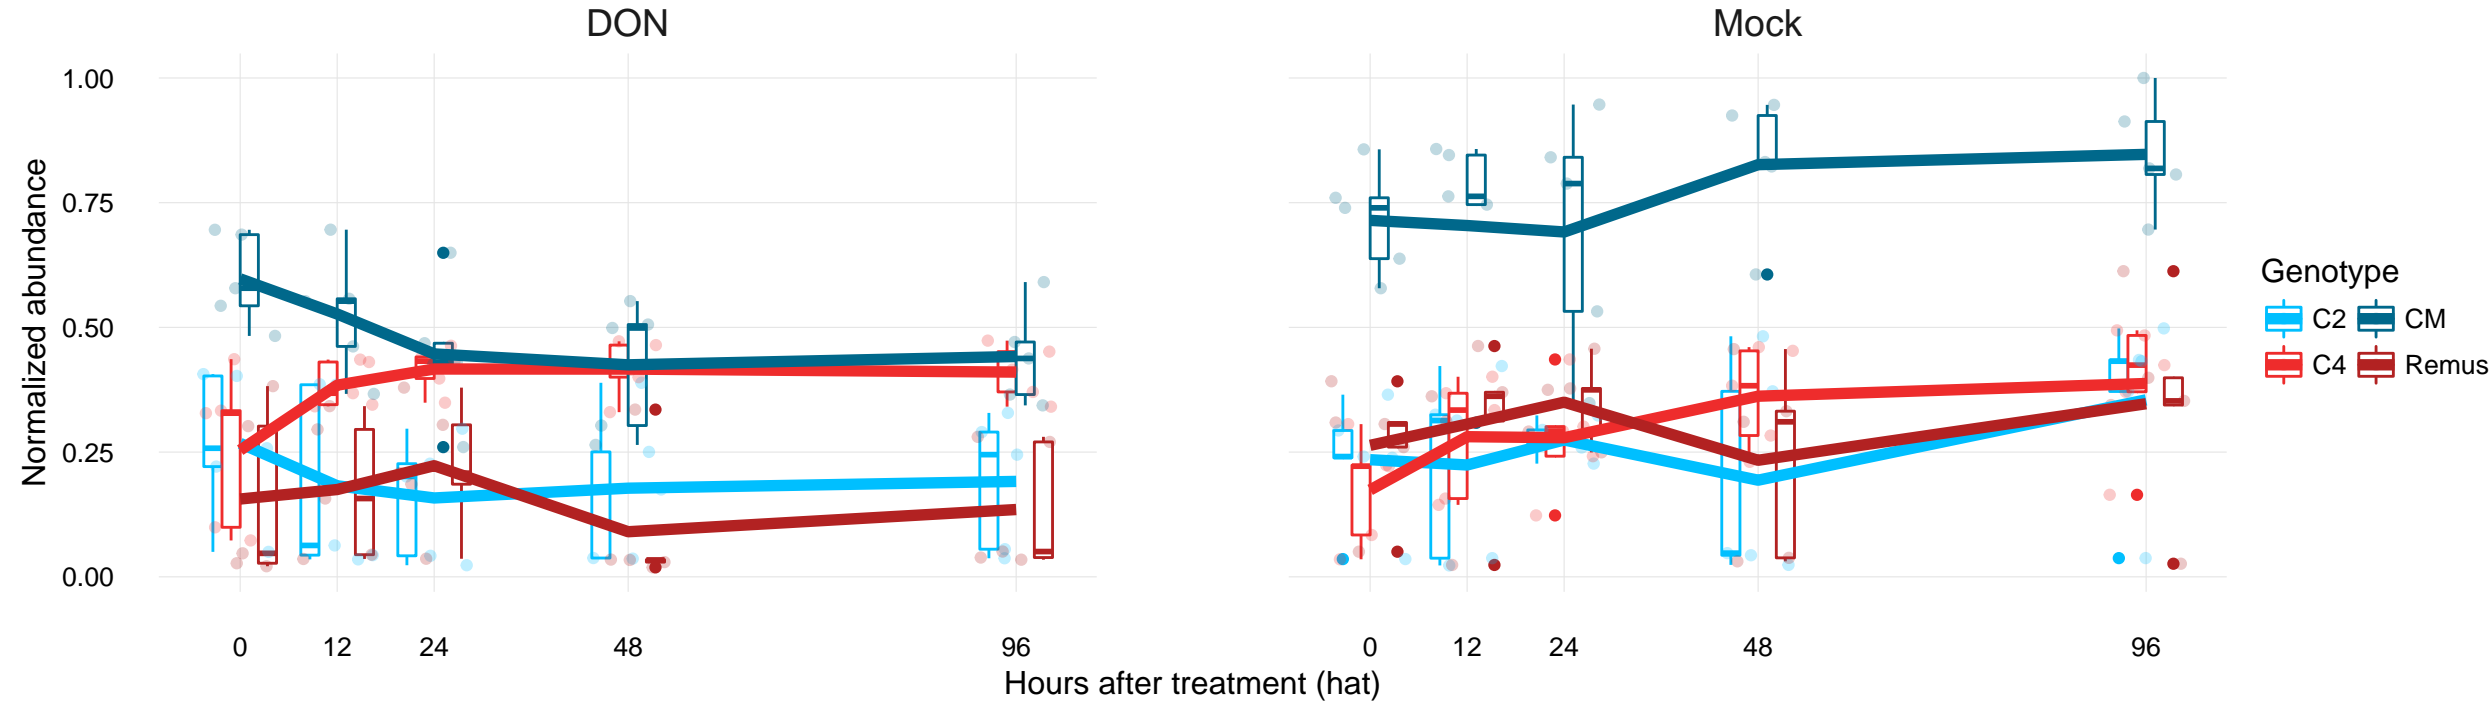

# A.132

Annotated as Flavonoid or Lignan  
(10 database hits)

|                |                                                |
|----------------|------------------------------------------------|
| MZ             | 415.1389                                       |
| RT             | 21.22 min                                      |
| Normalization  | Indirectly via surrogate<br>in the KPX samples |
| Cluster        | –                                              |
| Cn total / Phe | 22 / 18                                        |

## C2, C4; different treatments

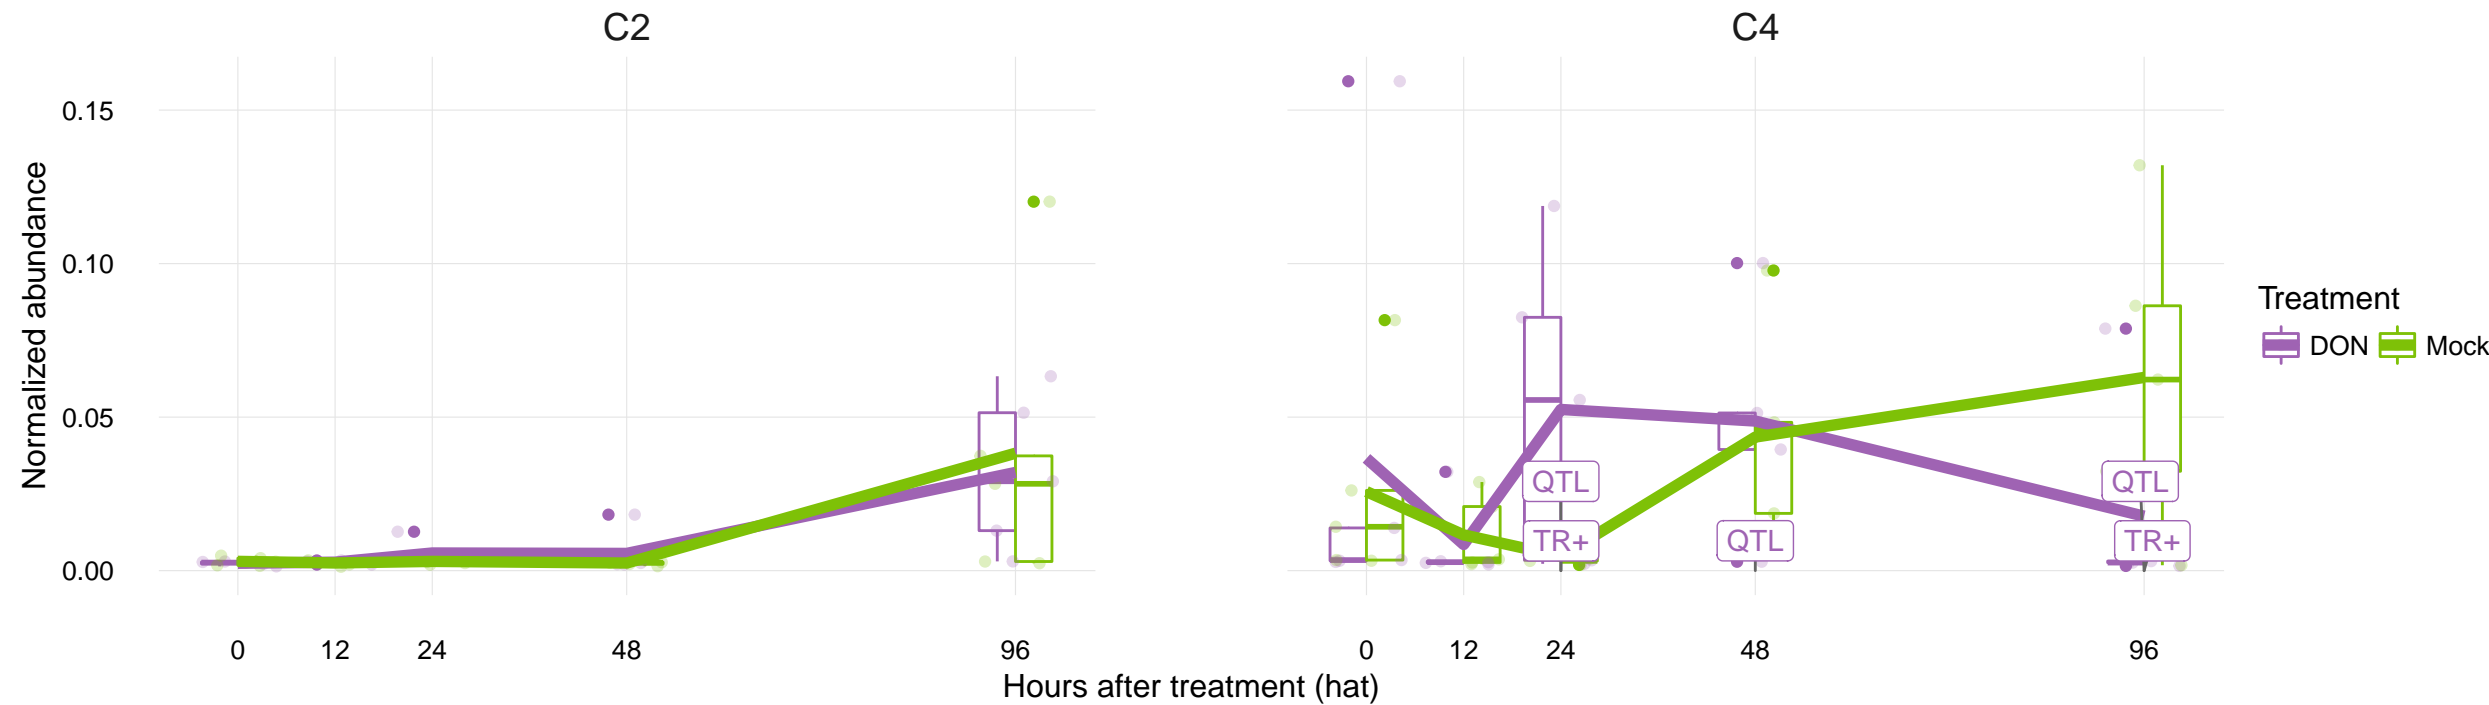

## DON, Mock; different genotypes

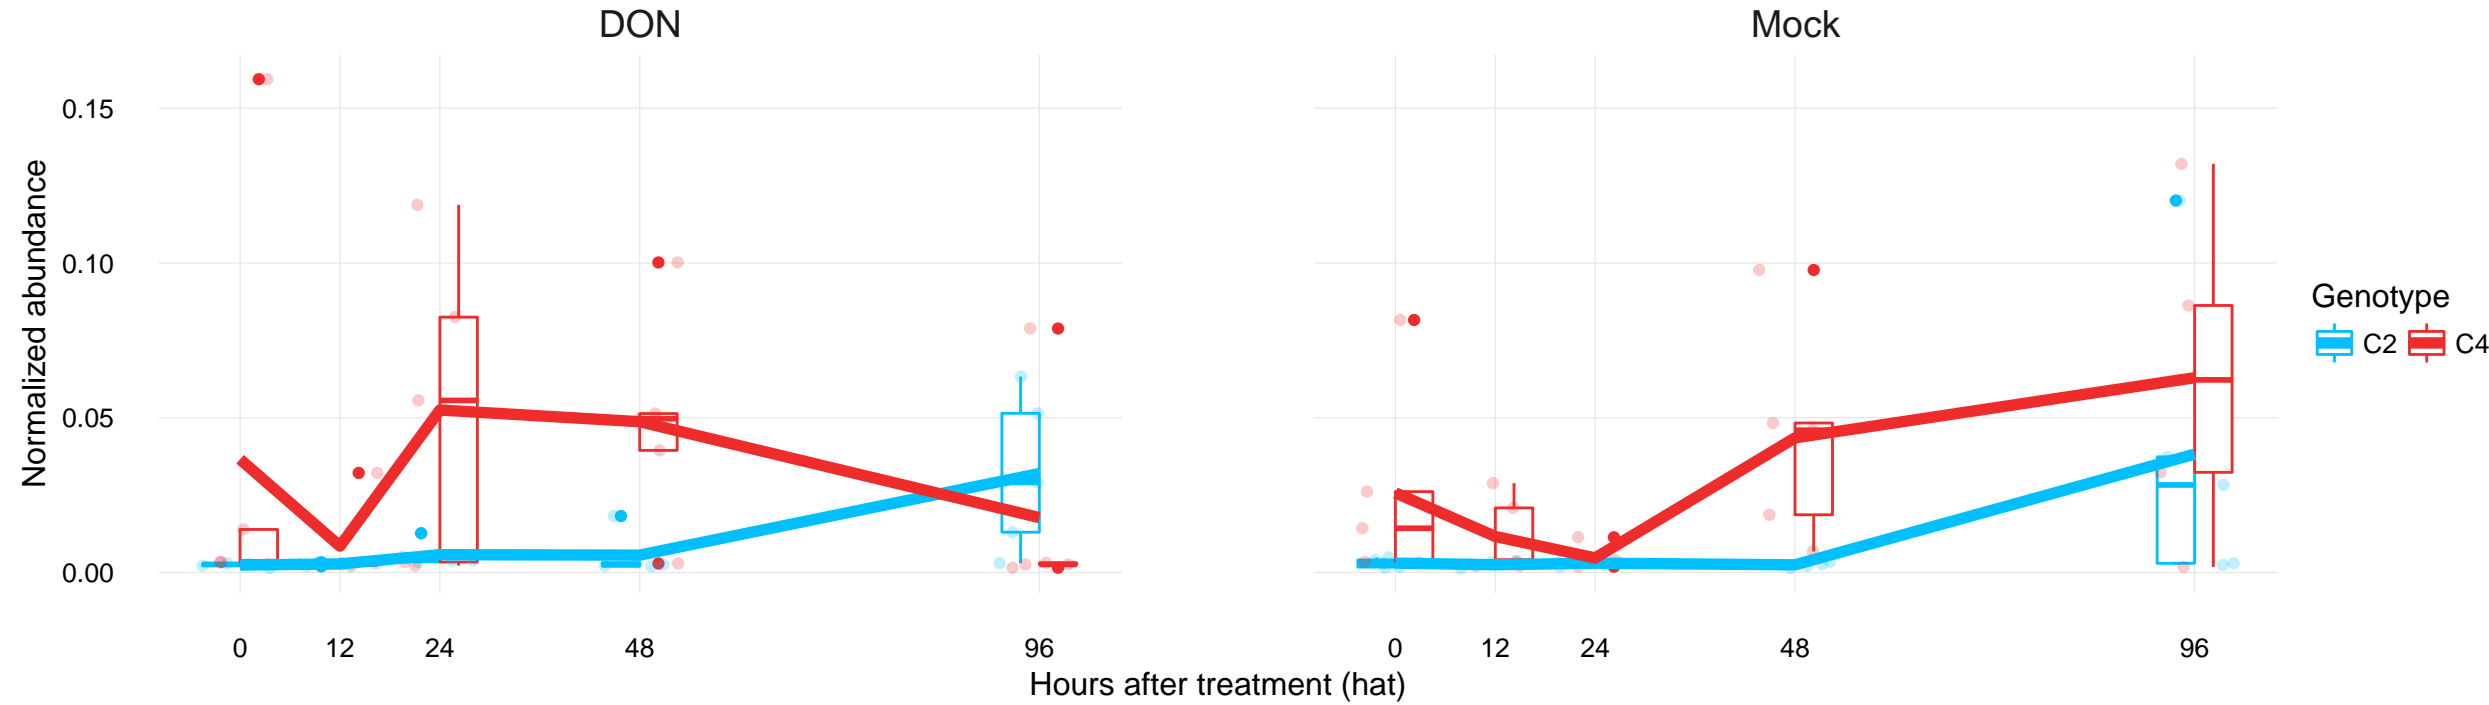

## CM, Remus; different treatments

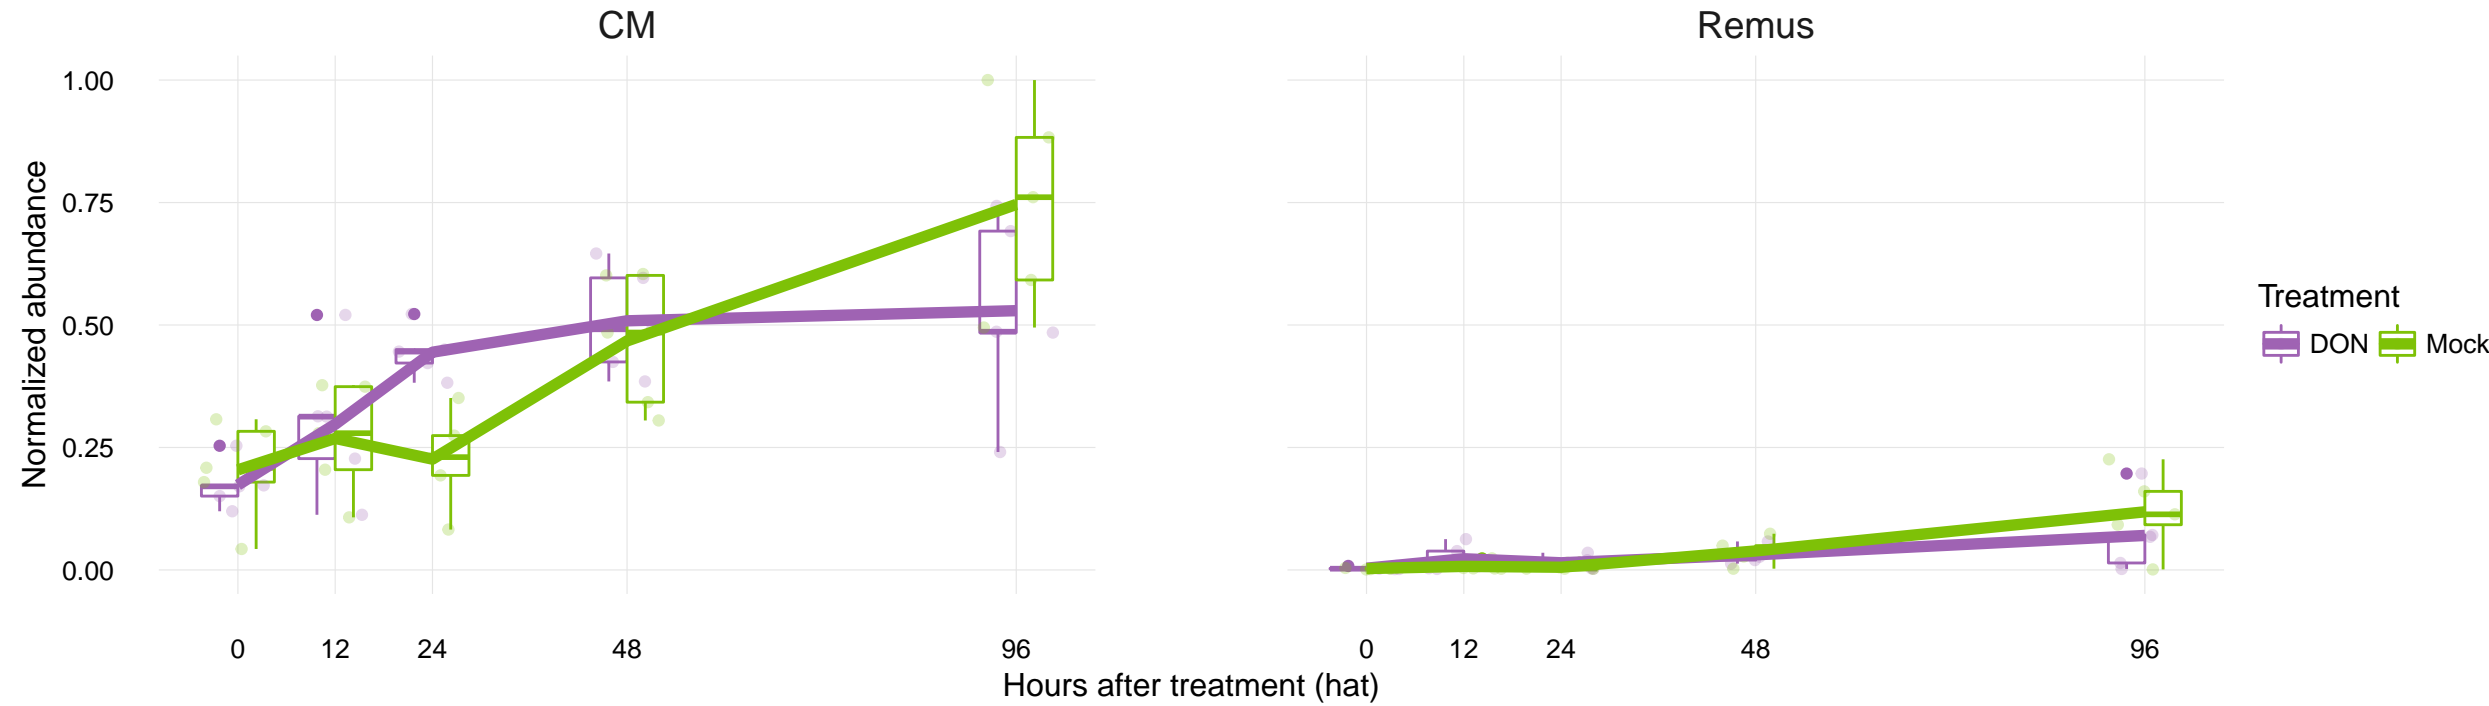

## DON, Mock; all four genotypes

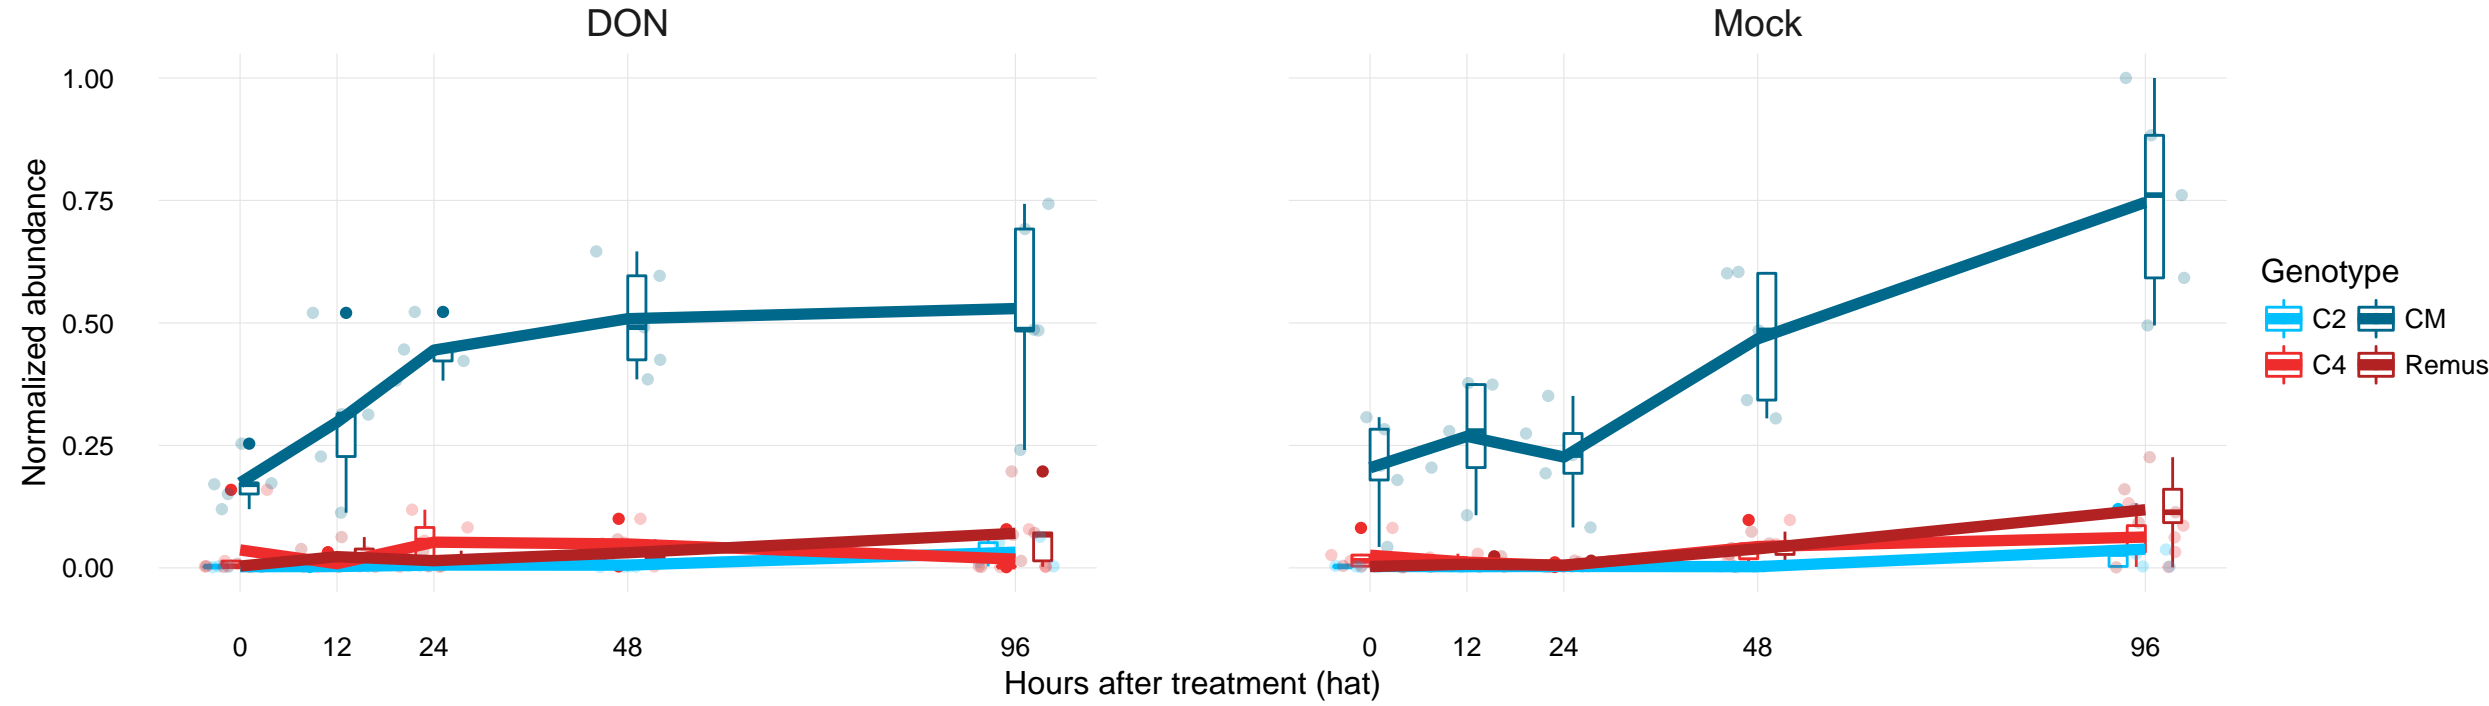

# A.108

Annotated as Flavonoid  
(30 database hits)

|                |                                                |
|----------------|------------------------------------------------|
| MZ             | 395.1102                                       |
| RT             | 17.59 min                                      |
| Normalization  | Indirectly via surrogate<br>in the KPX samples |
| Cluster        | —                                              |
| Cn total / Phe | 20 /                                           |

## C2, C4; different treatments

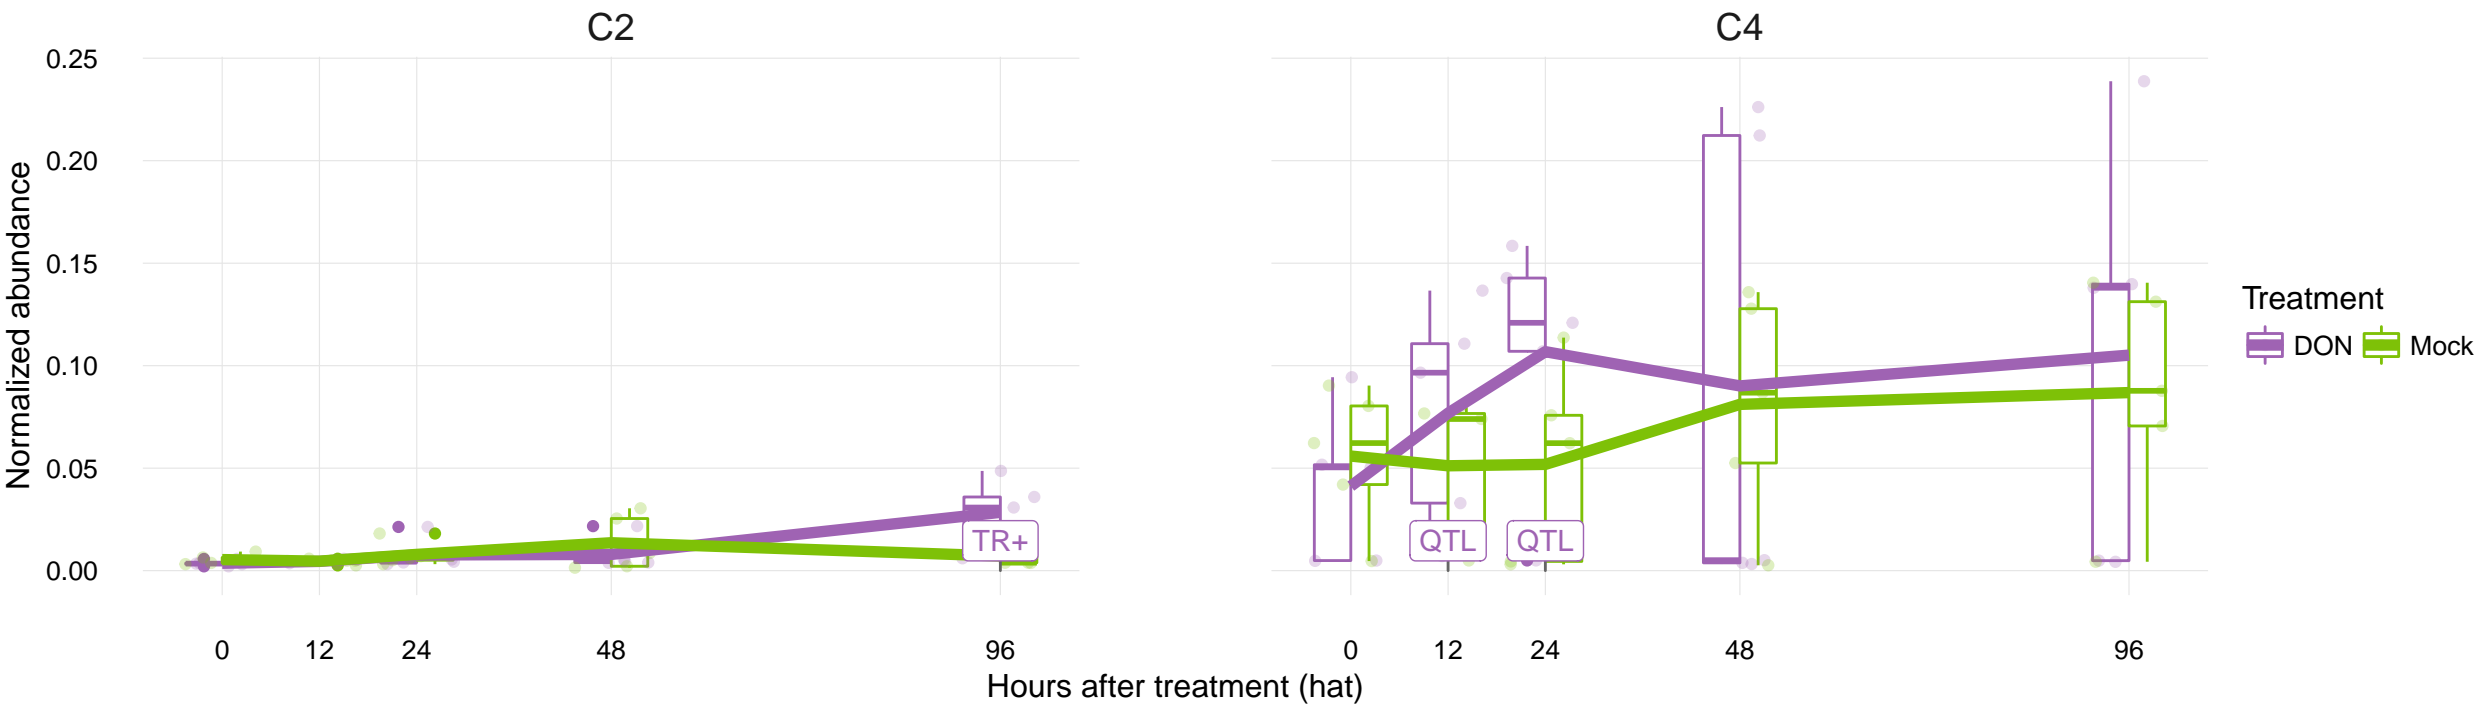

## DON, Mock; different genotypes

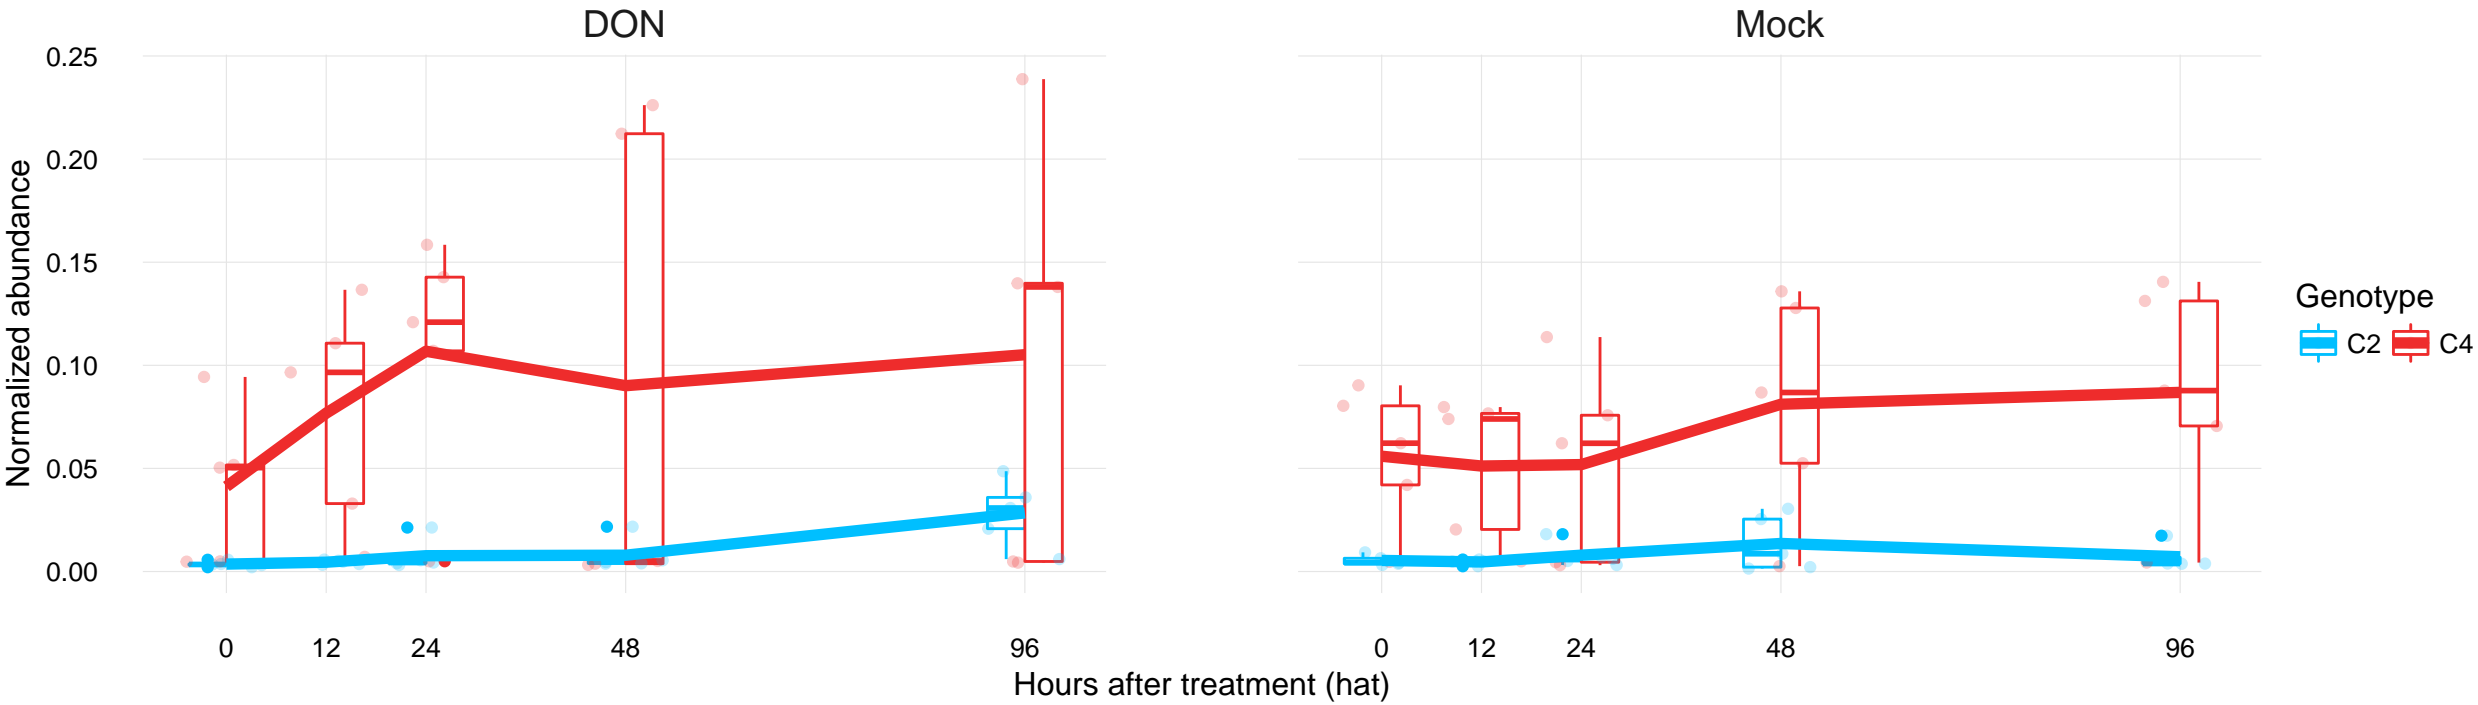

## CM, Remus; different treatments

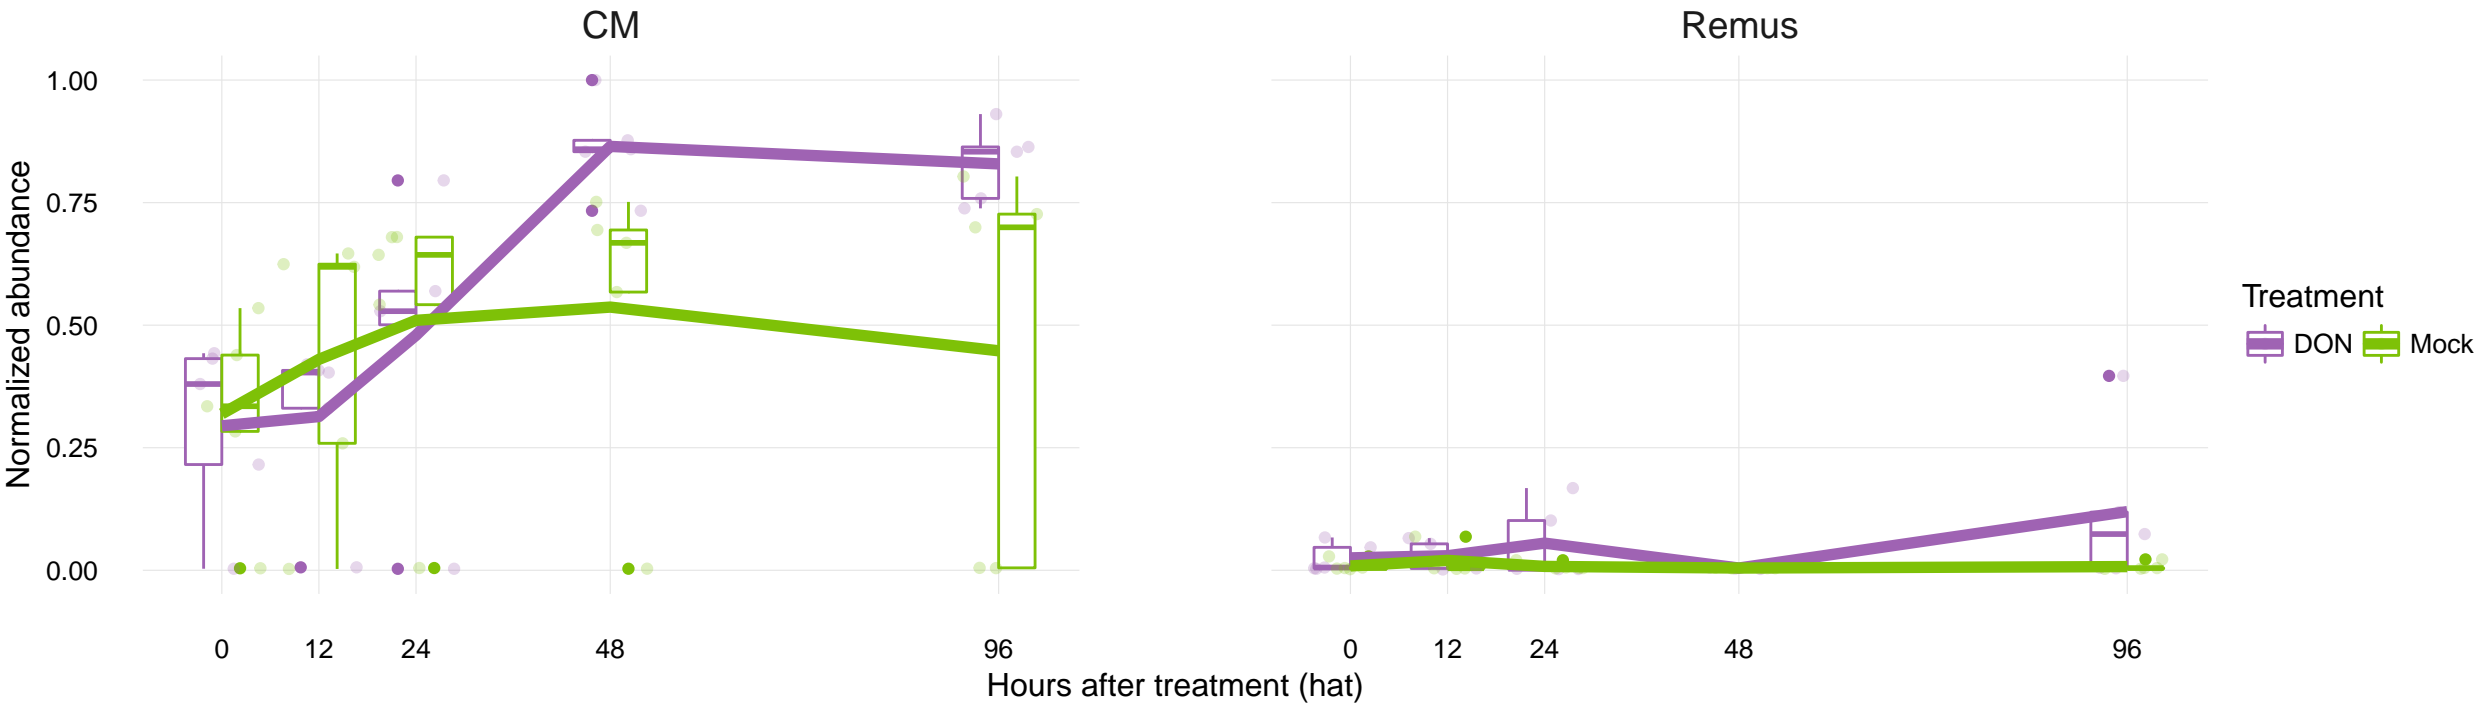

## DON, Mock; all four genotypes

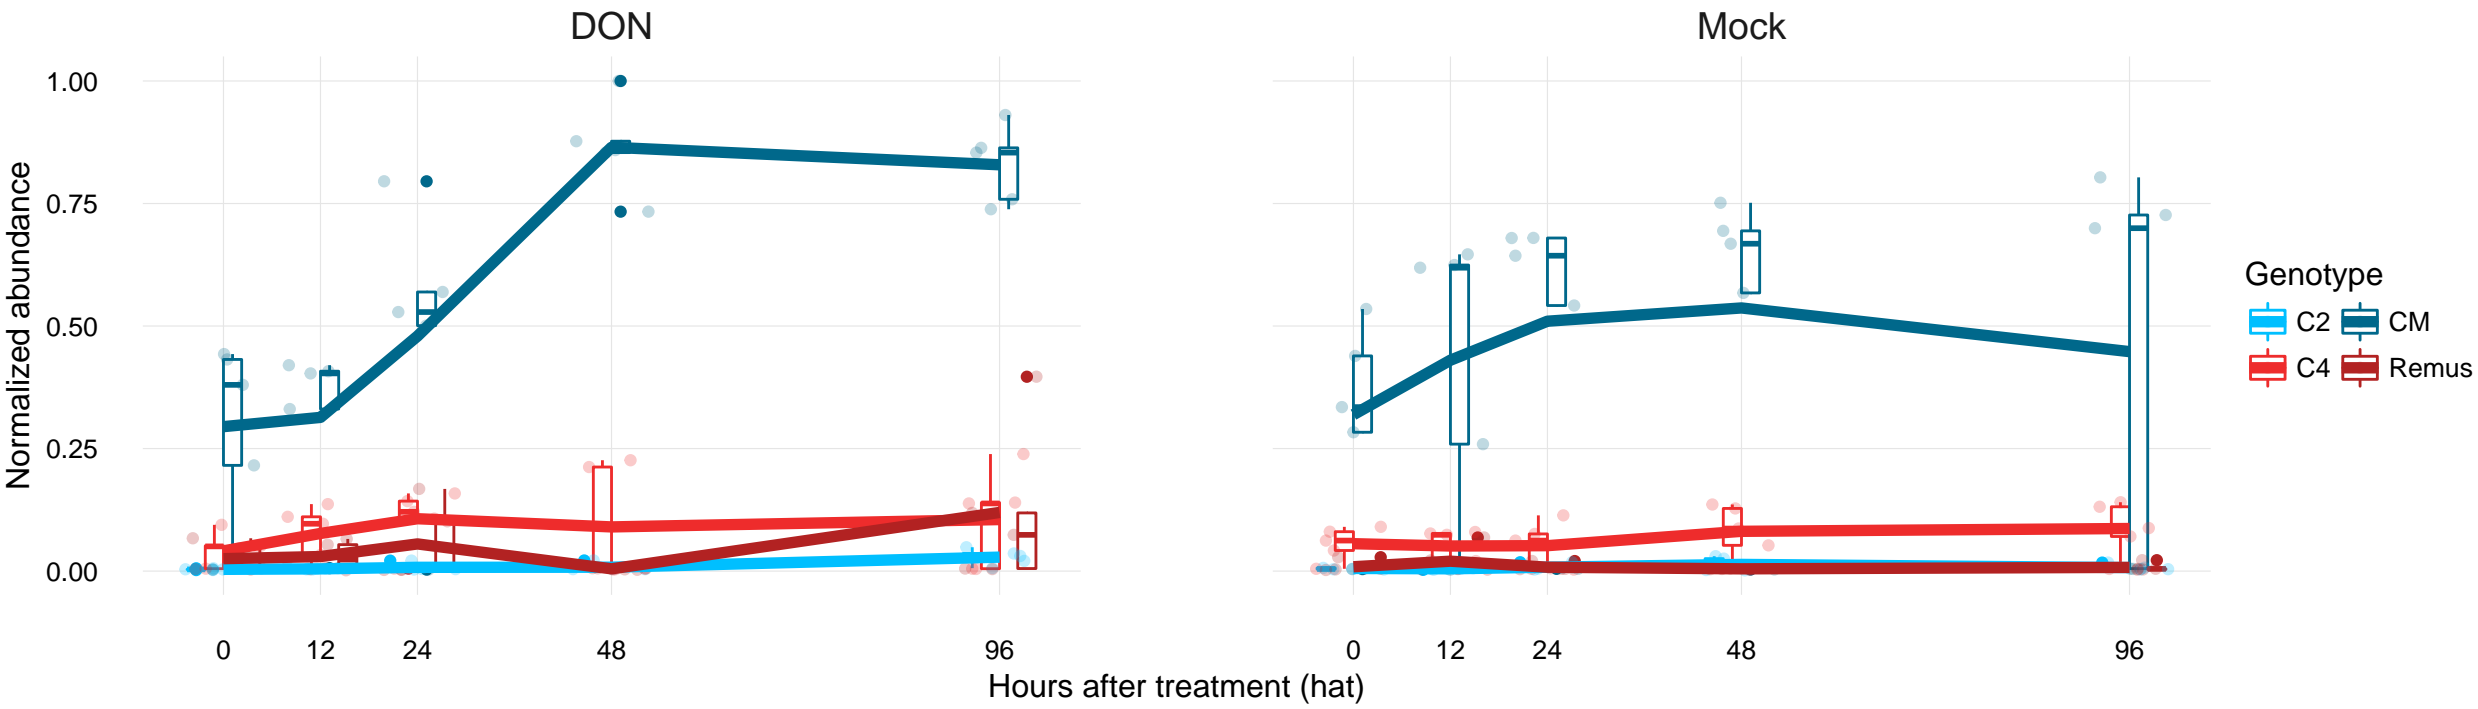

# U.5

Unknown Phe-derived wheat-metabolite

|                |                                                |
|----------------|------------------------------------------------|
| MZ             | 450.1609                                       |
| RT             | 12.78 min                                      |
| Normalization  | Indirectly via surrogate<br>in the KPX samples |
| Cluster        | –                                              |
| Cn total / Phe | 18 / 6                                         |

## C2, C4; different treatments

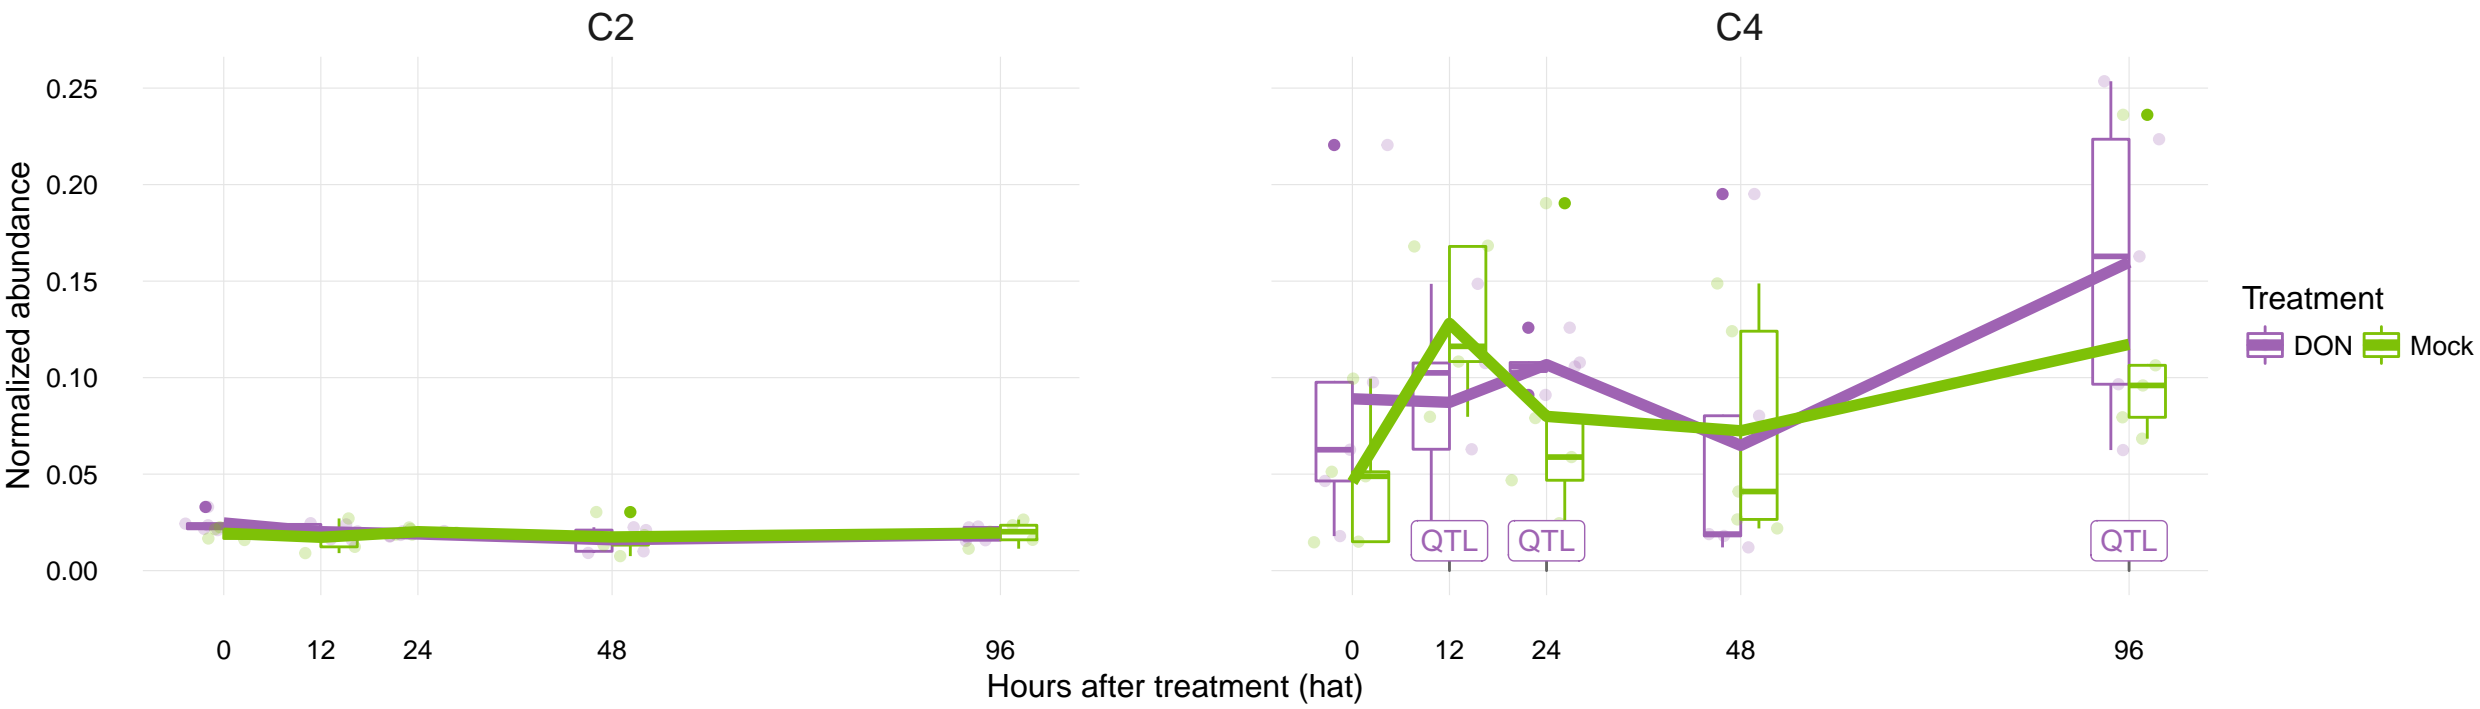

## DON, Mock; different genotypes

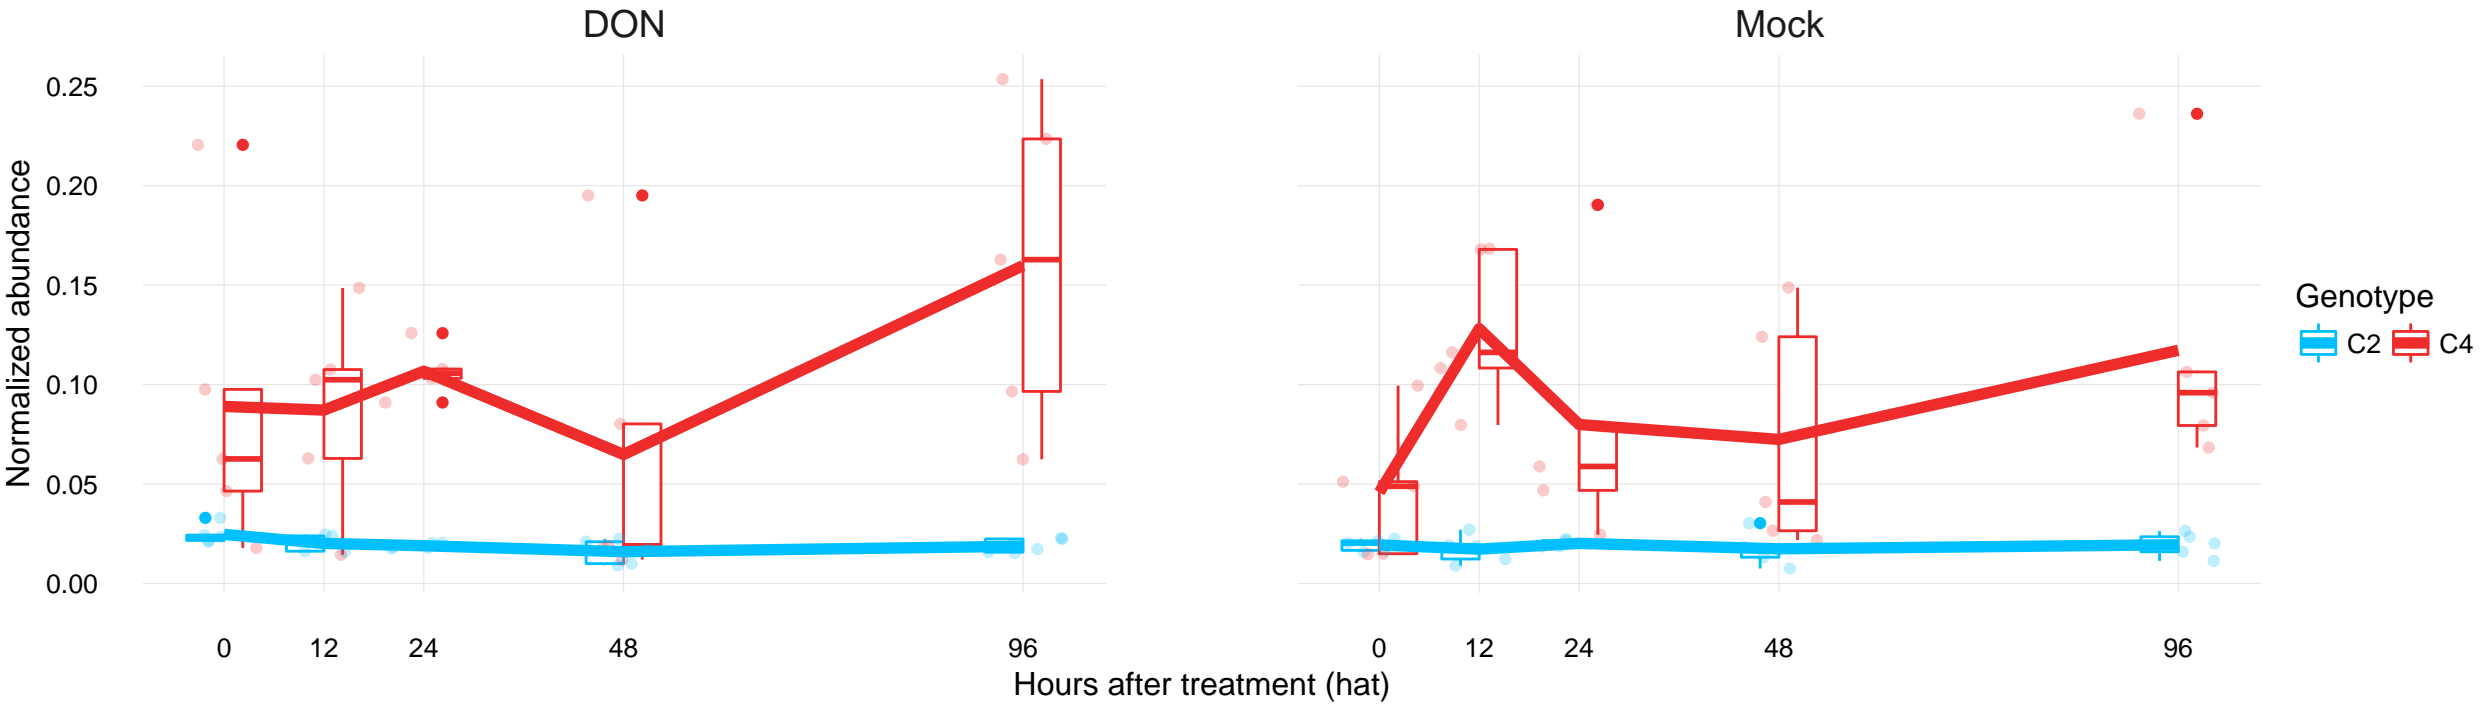

## CM, Remus; different treatments

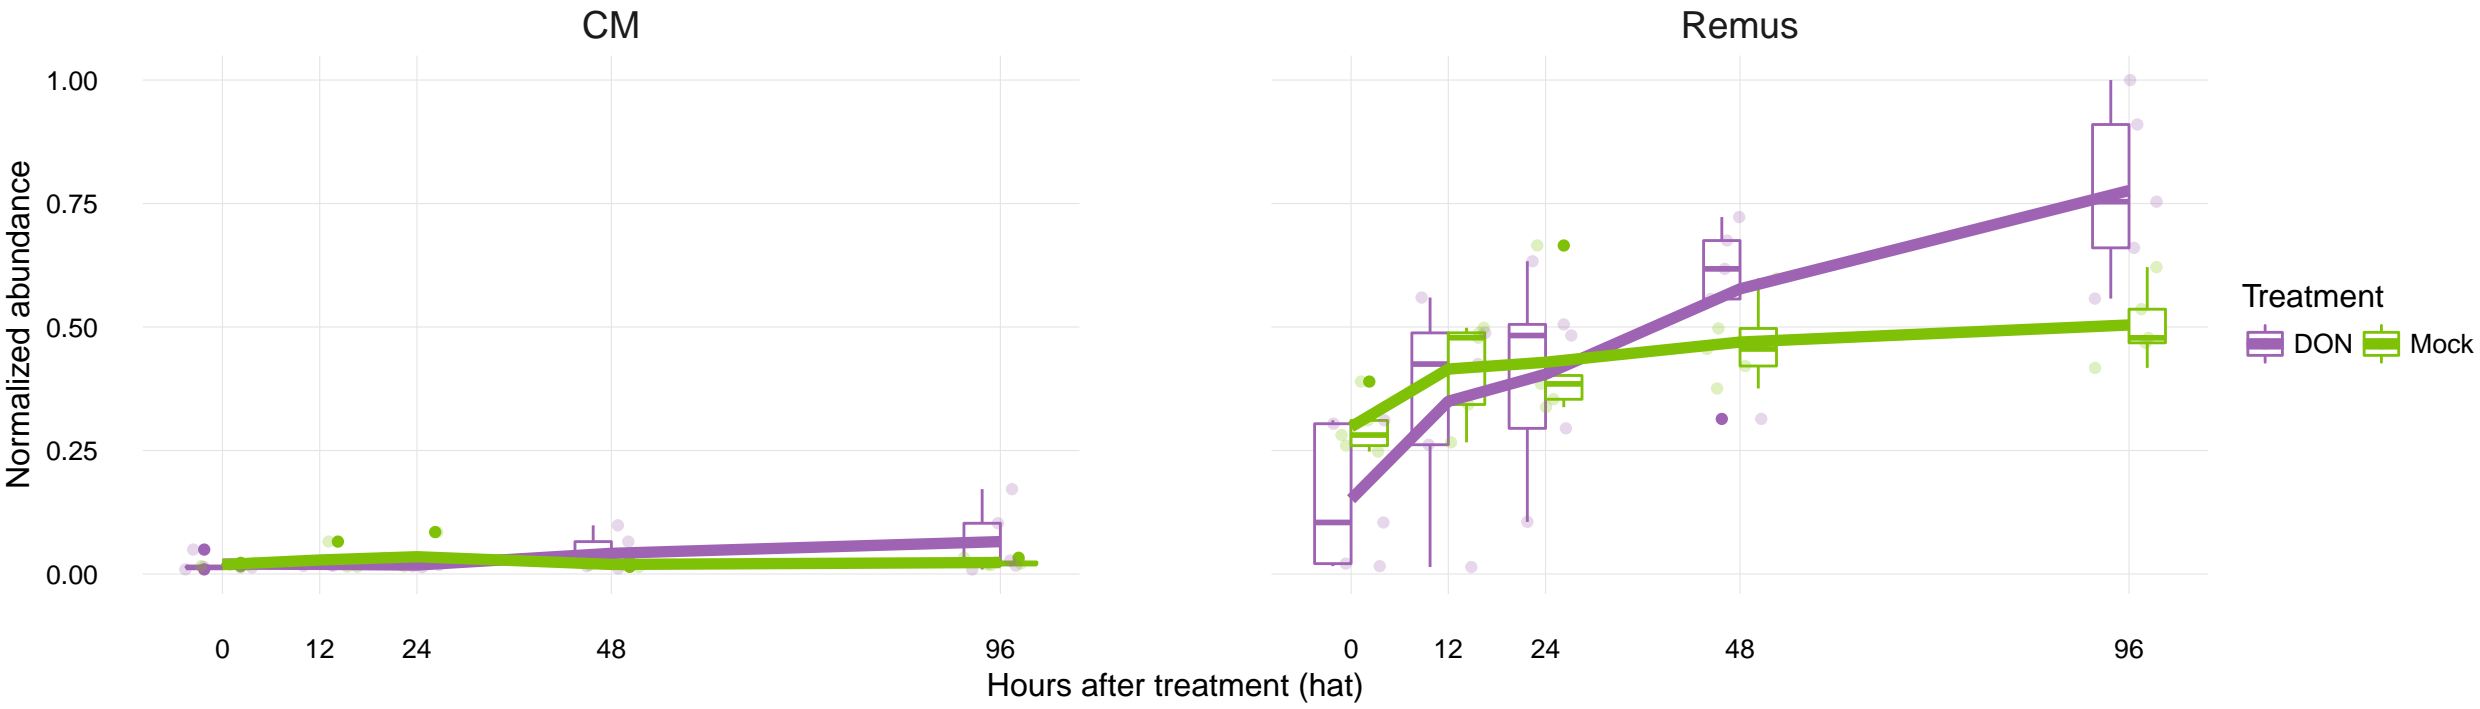

## DON, Mock; all four genotypes

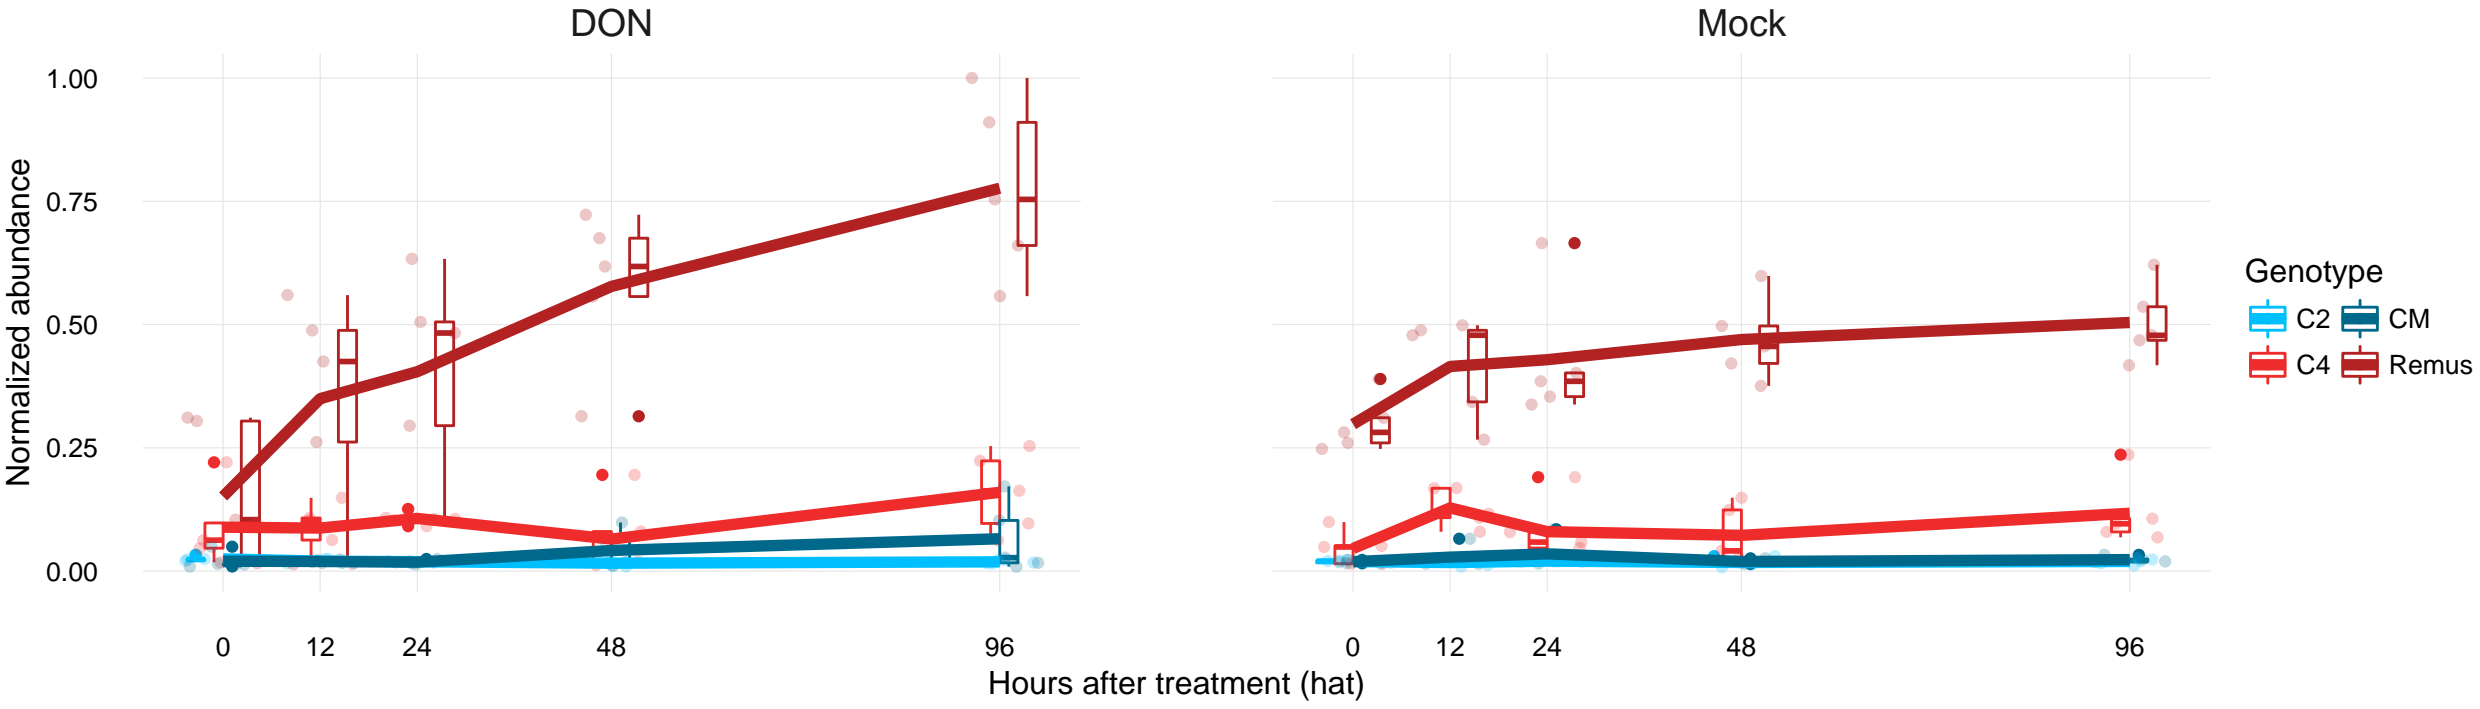



# A.86

Annotated as Flavonoid  
(30 database hits)

|                |                          |
|----------------|--------------------------|
| MZ             | 341.1385                 |
| RT             | 15.2 min                 |
| Normalization  | Directly via KPX samples |
| Cluster        | –                        |
| Cn total / Phe | 20 /                     |

## C2, C4; different treatments

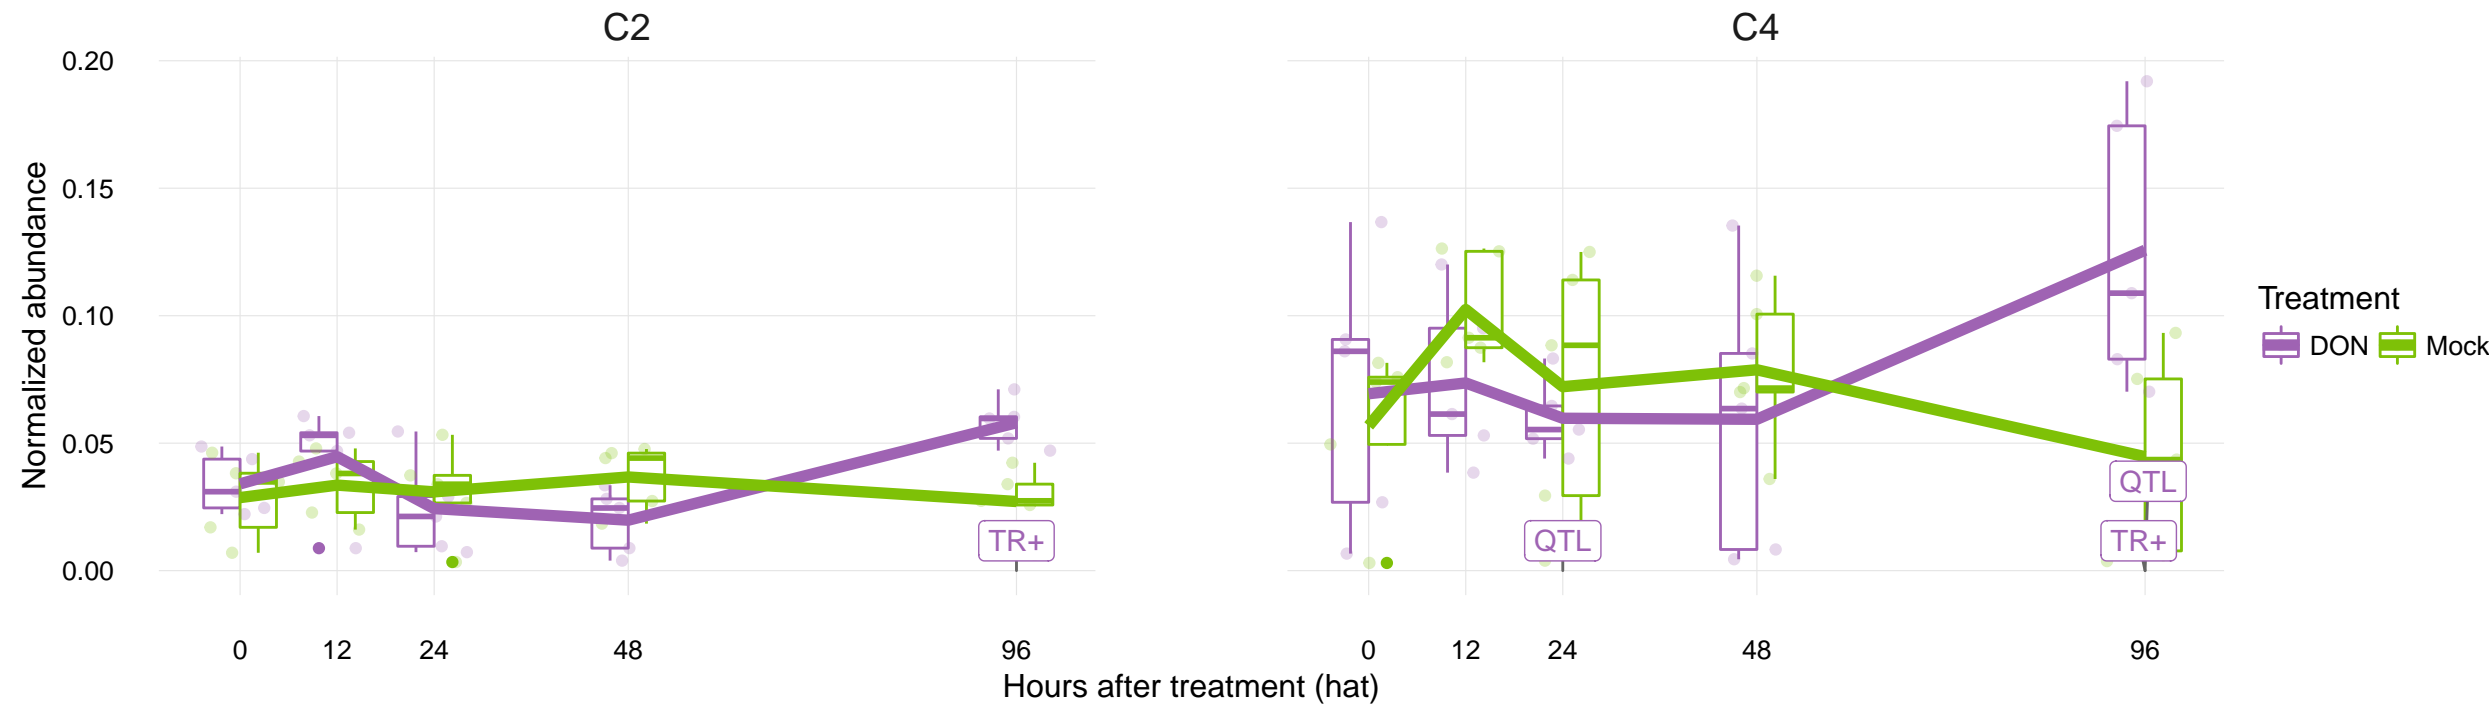

## DON, Mock; different genotypes

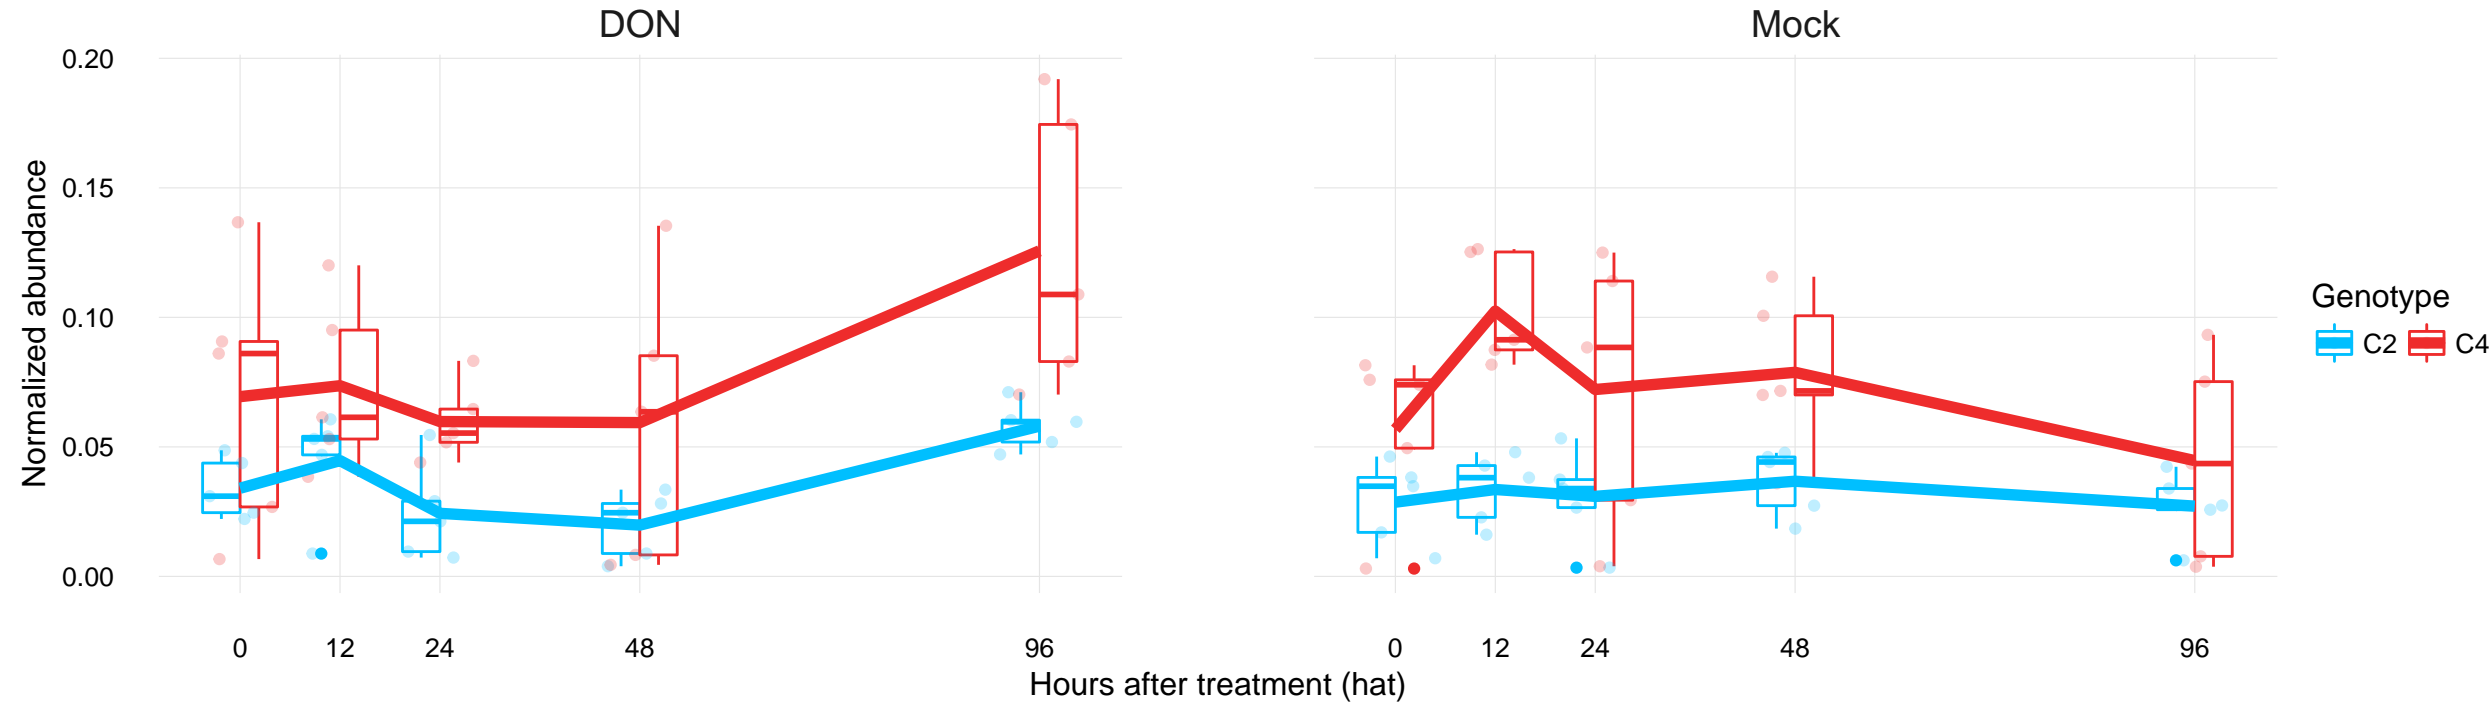

## CM, Remus; different treatments

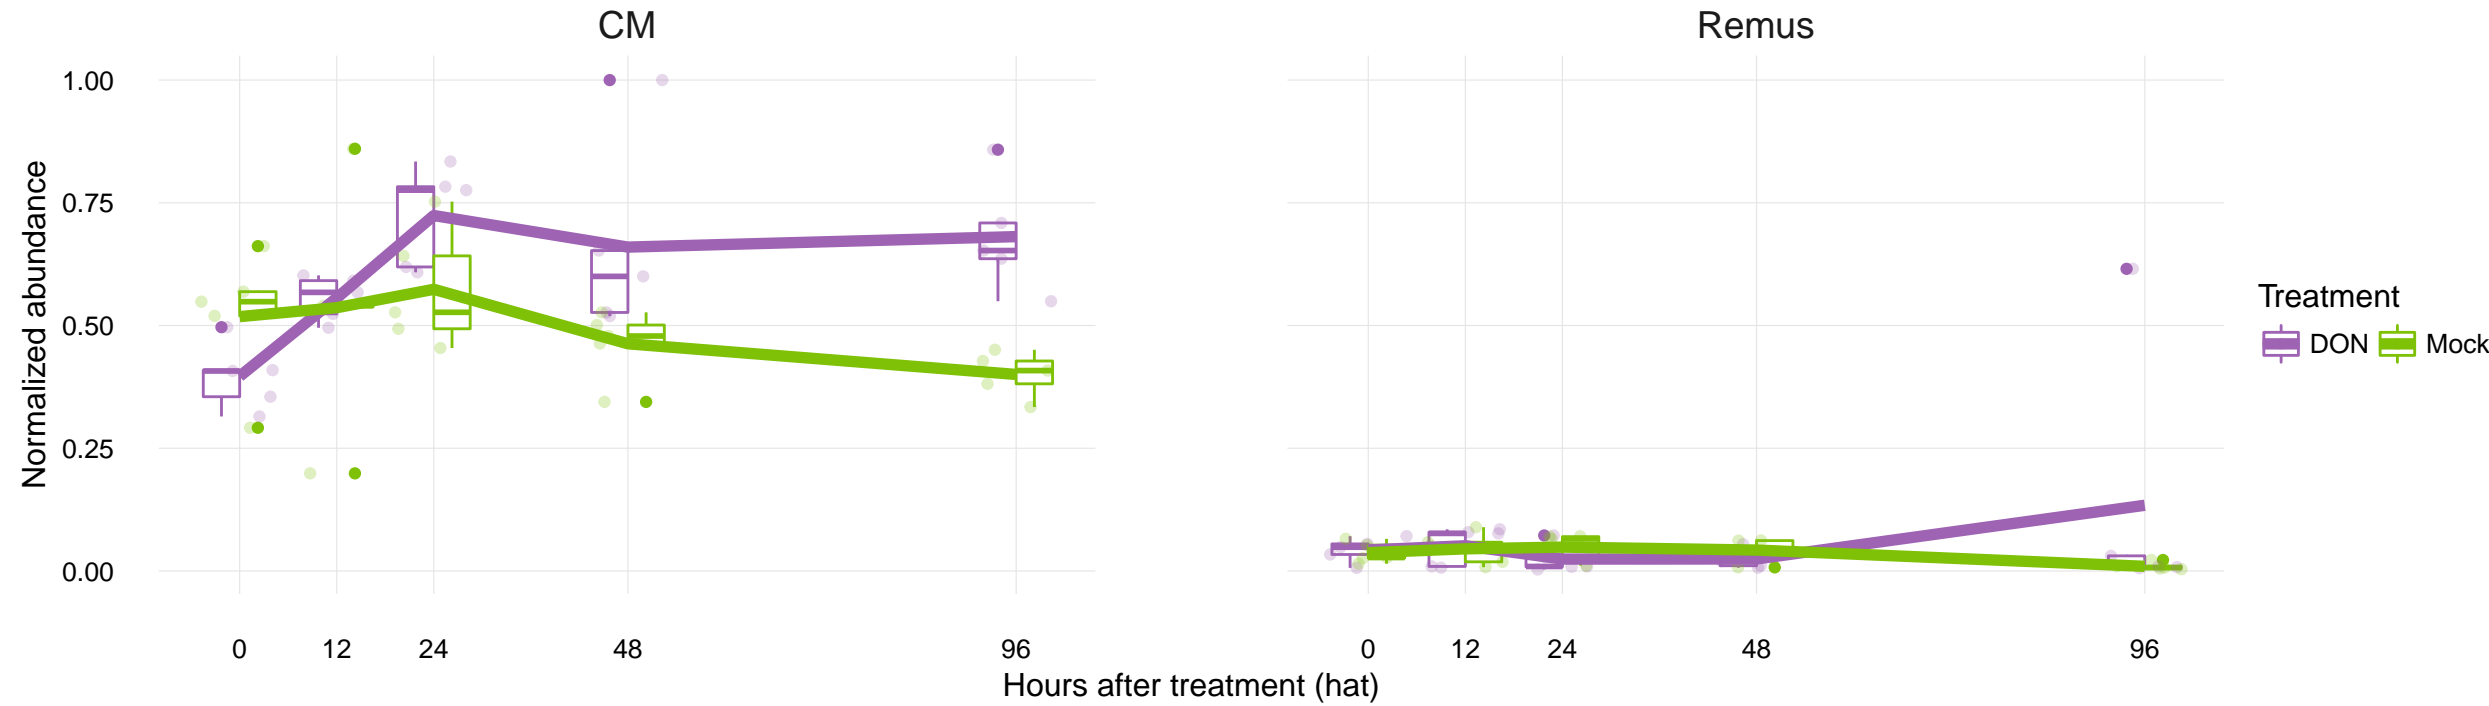

## DON, Mock; all four genotypes

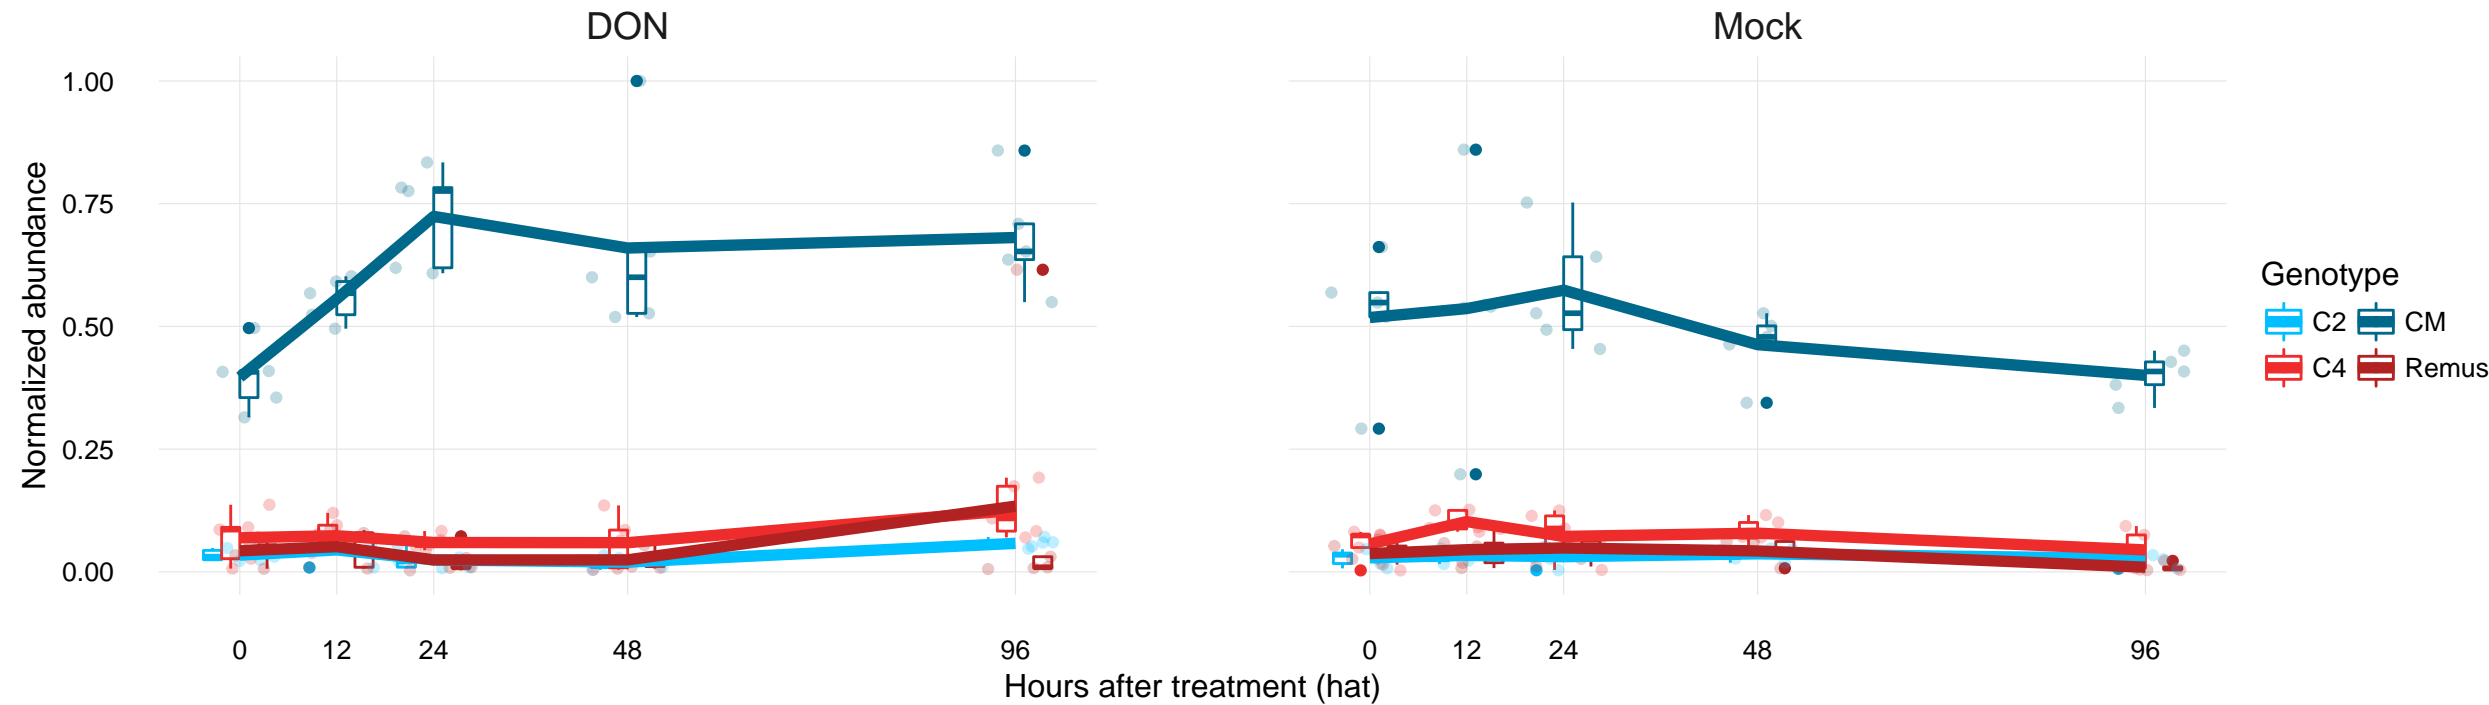

# A.73

Annotated as Putative phenylacetic acid derivative  
(1 database hit)

|                |                          |
|----------------|--------------------------|
| MZ             | 434.2024                 |
| RT             | 13.89 min                |
| Normalization  | Directly via KPX samples |
| Cluster        | –                        |
| Cn total / Phe | 19 / 8                   |

## C2, C4; different treatments

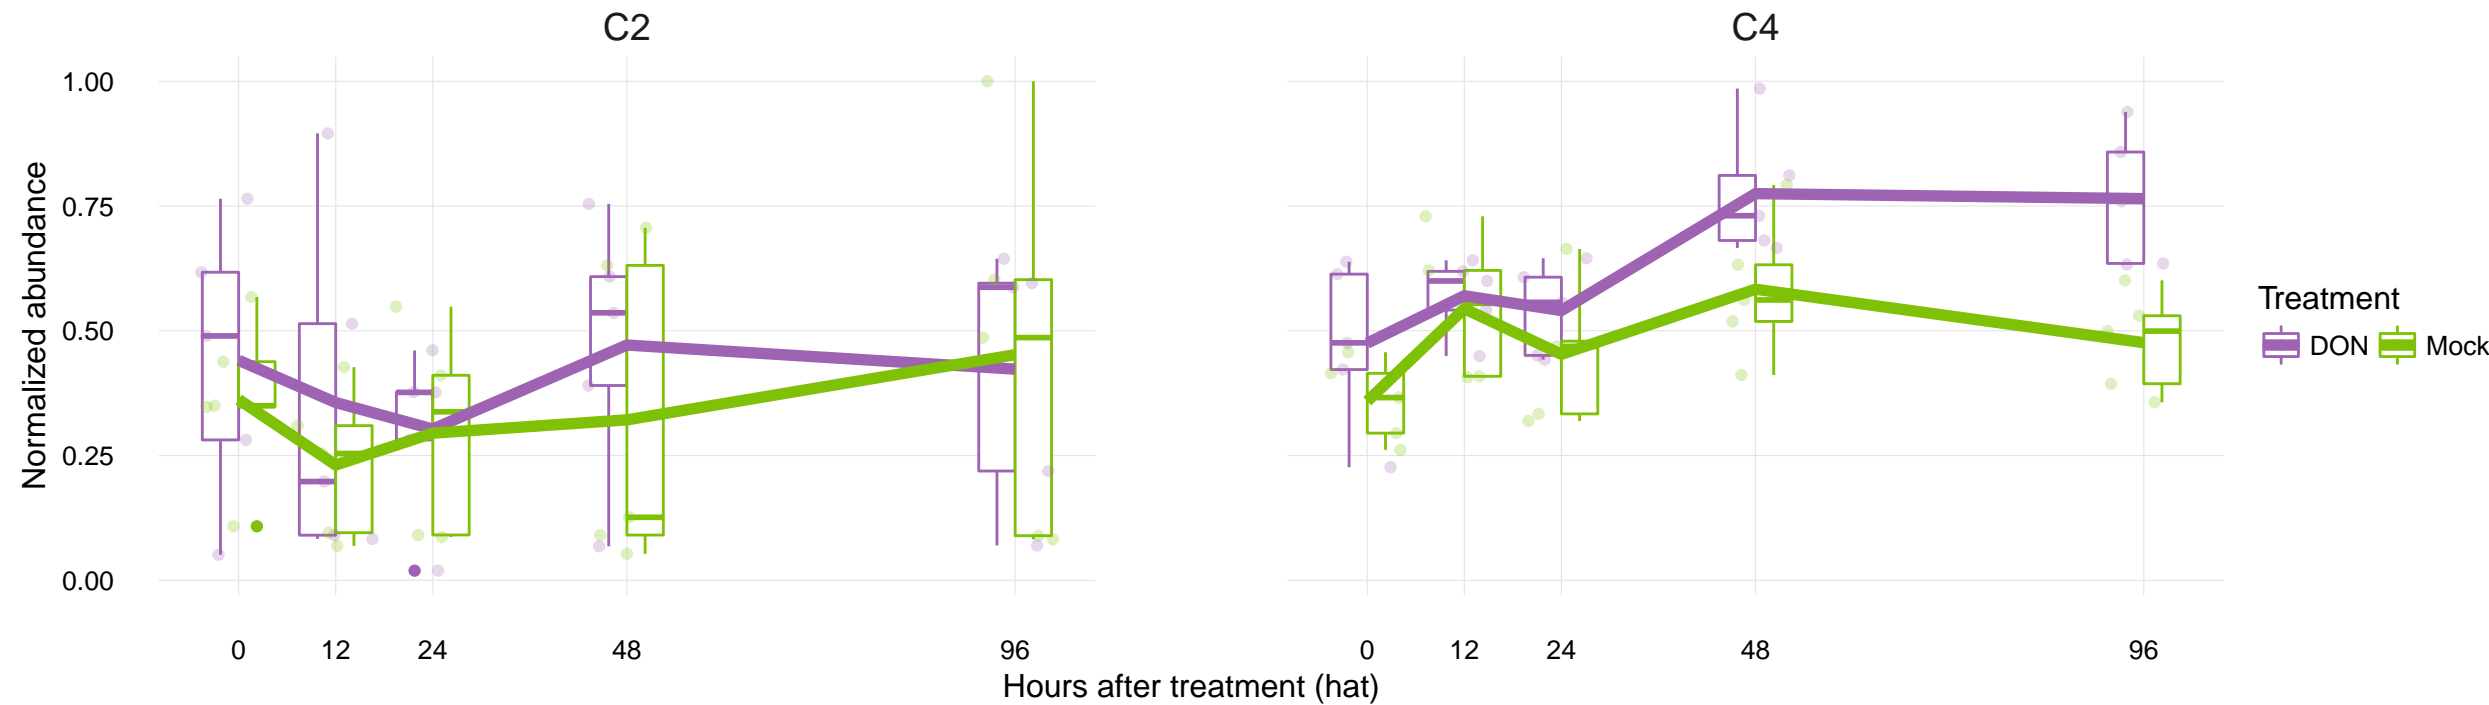

## DON, Mock; different genotypes

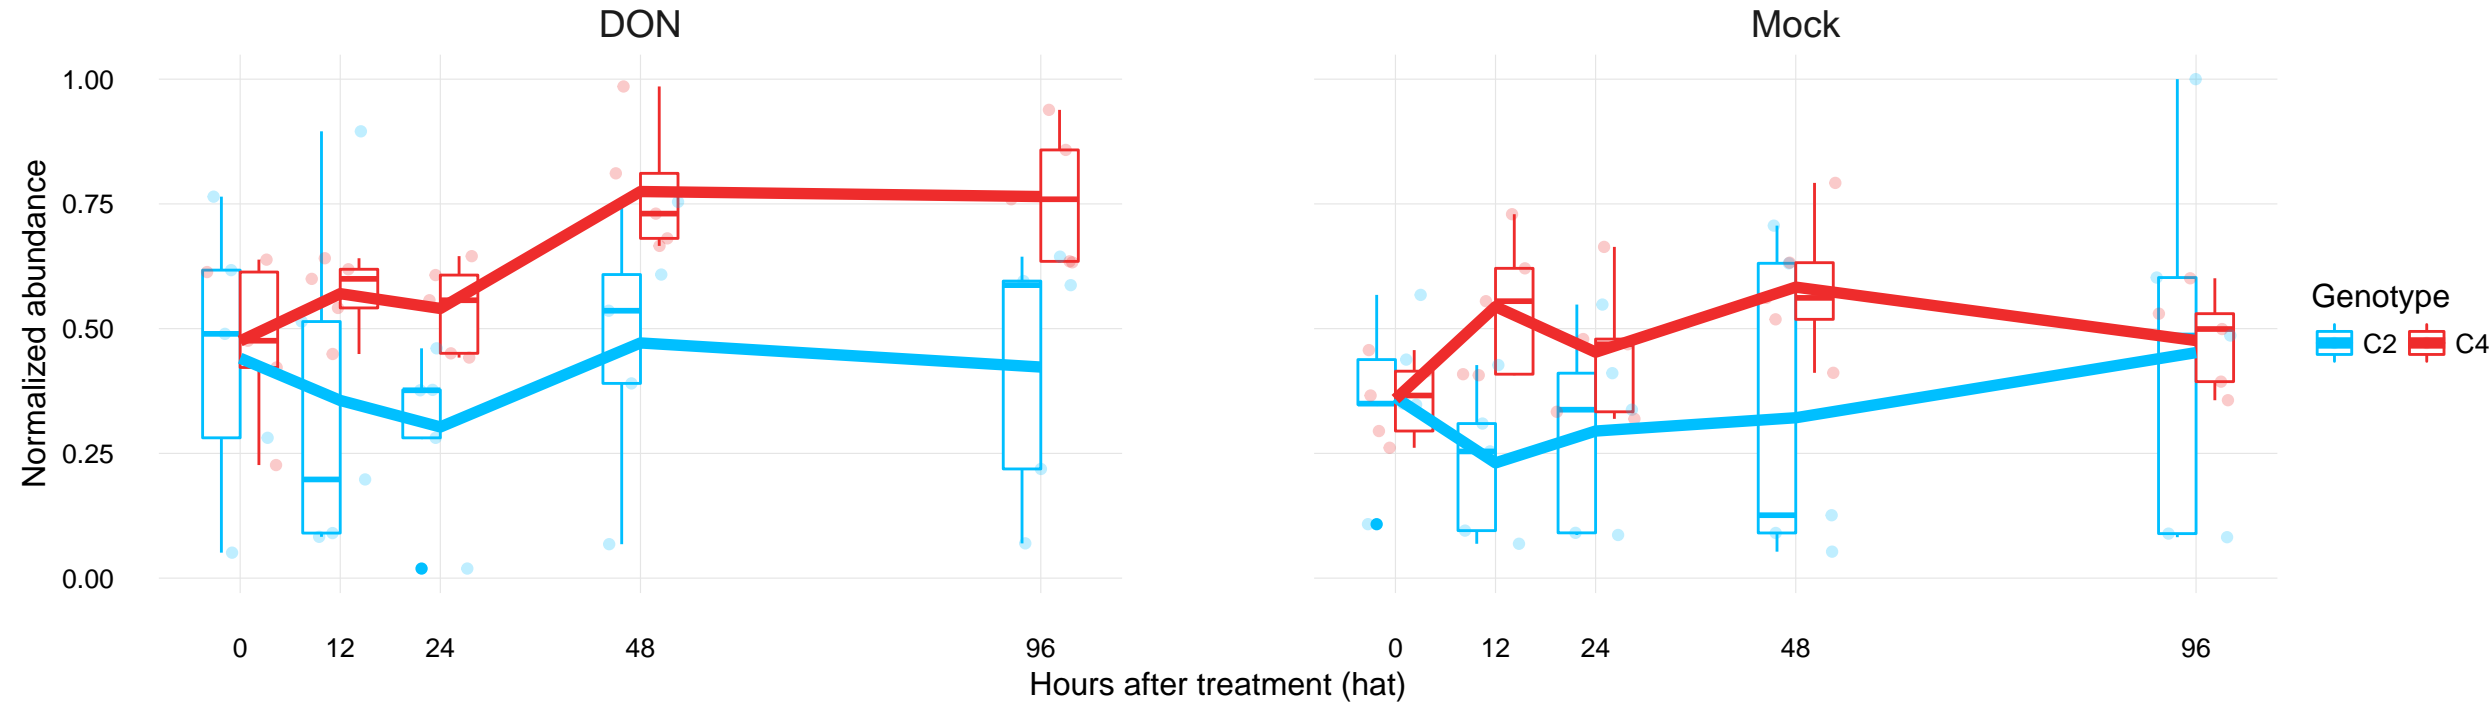

## CM, Remus; different treatments

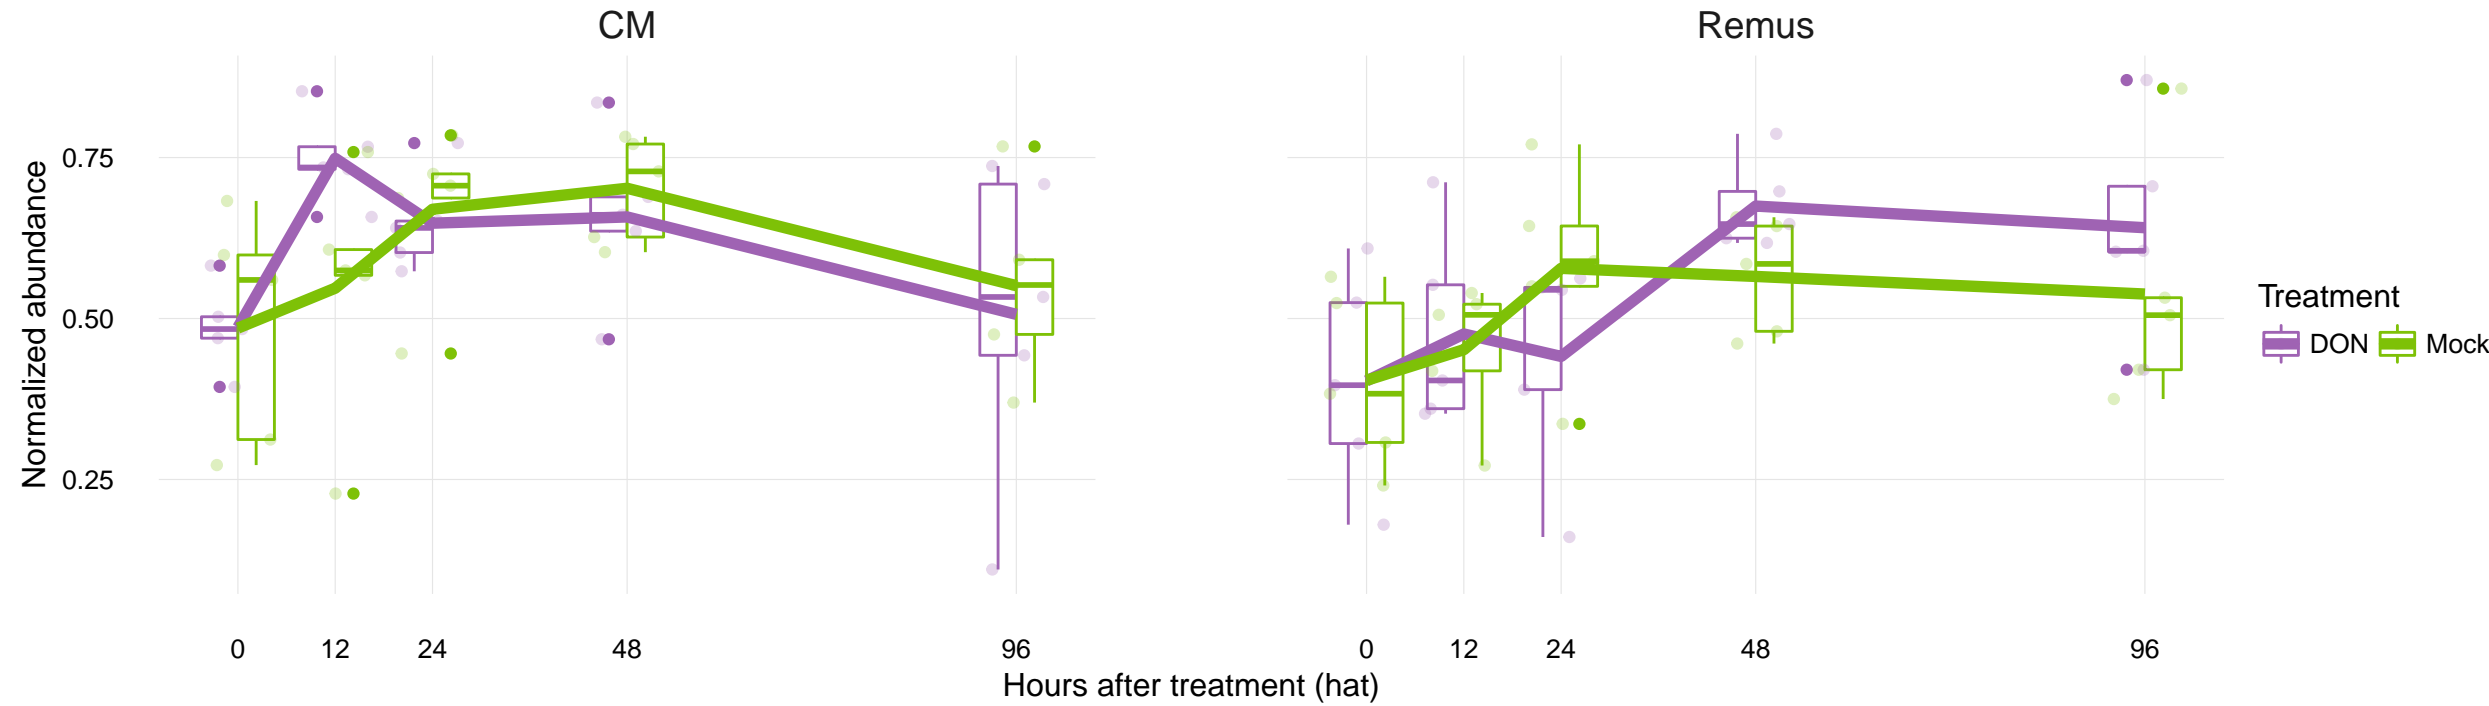

## DON, Mock; all four genotypes

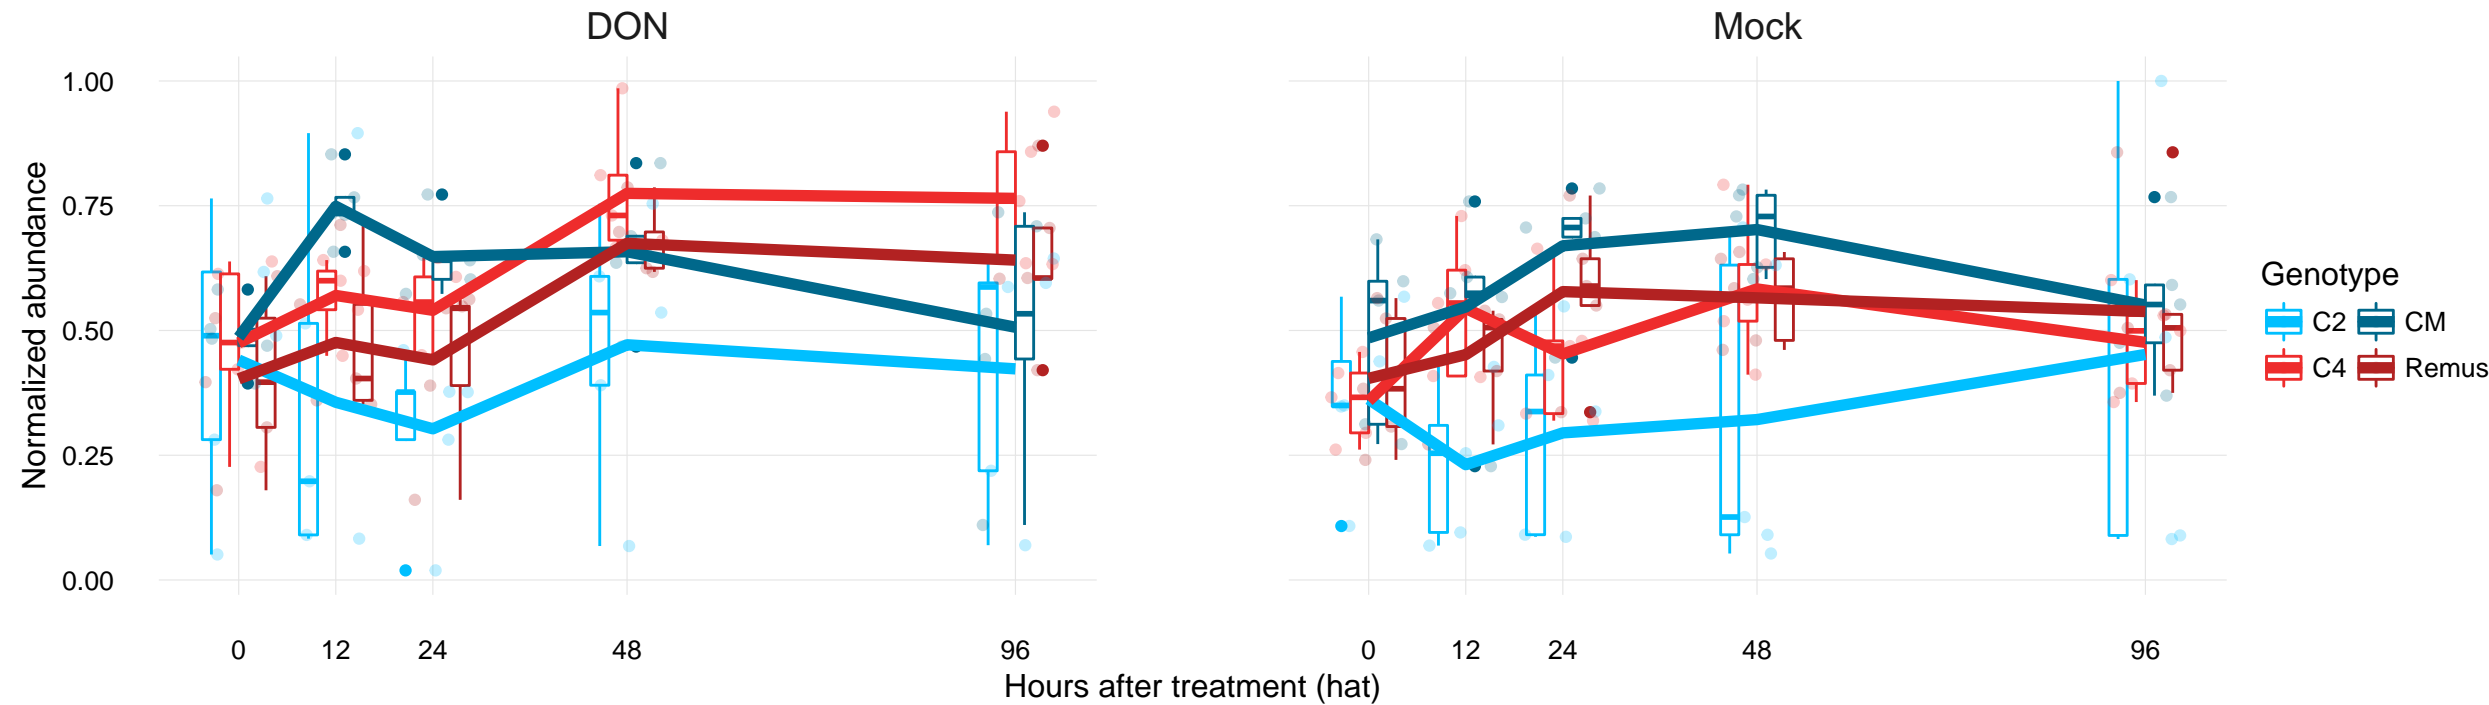

# A.78

Annotated as HCAA (diHCAA)  
(1 database hit)

|                |                                                |
|----------------|------------------------------------------------|
| MZ             | 438.2389                                       |
| RT             | 14.22 min                                      |
| Normalization  | Indirectly via surrogate<br>in the KPX samples |
| Cluster        | –                                              |
| Cn total / Phe | 25 / 18                                        |

## C2, C4; different treatments

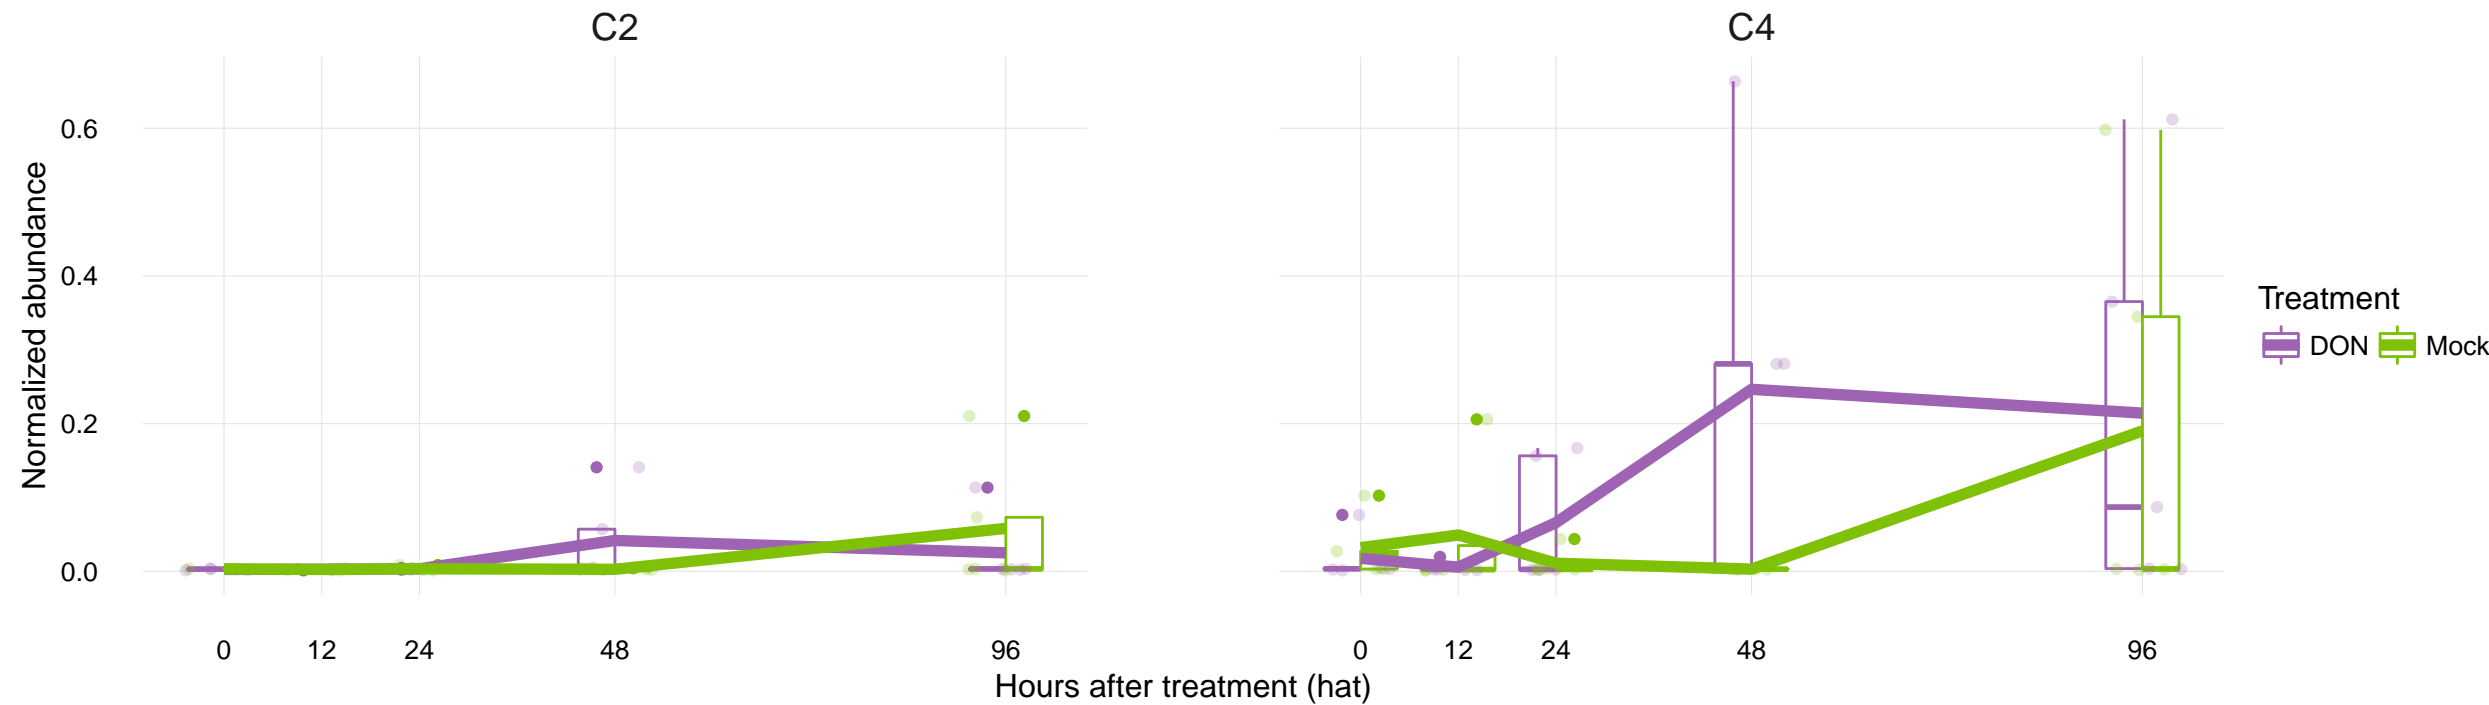

## DON, Mock; different genotypes

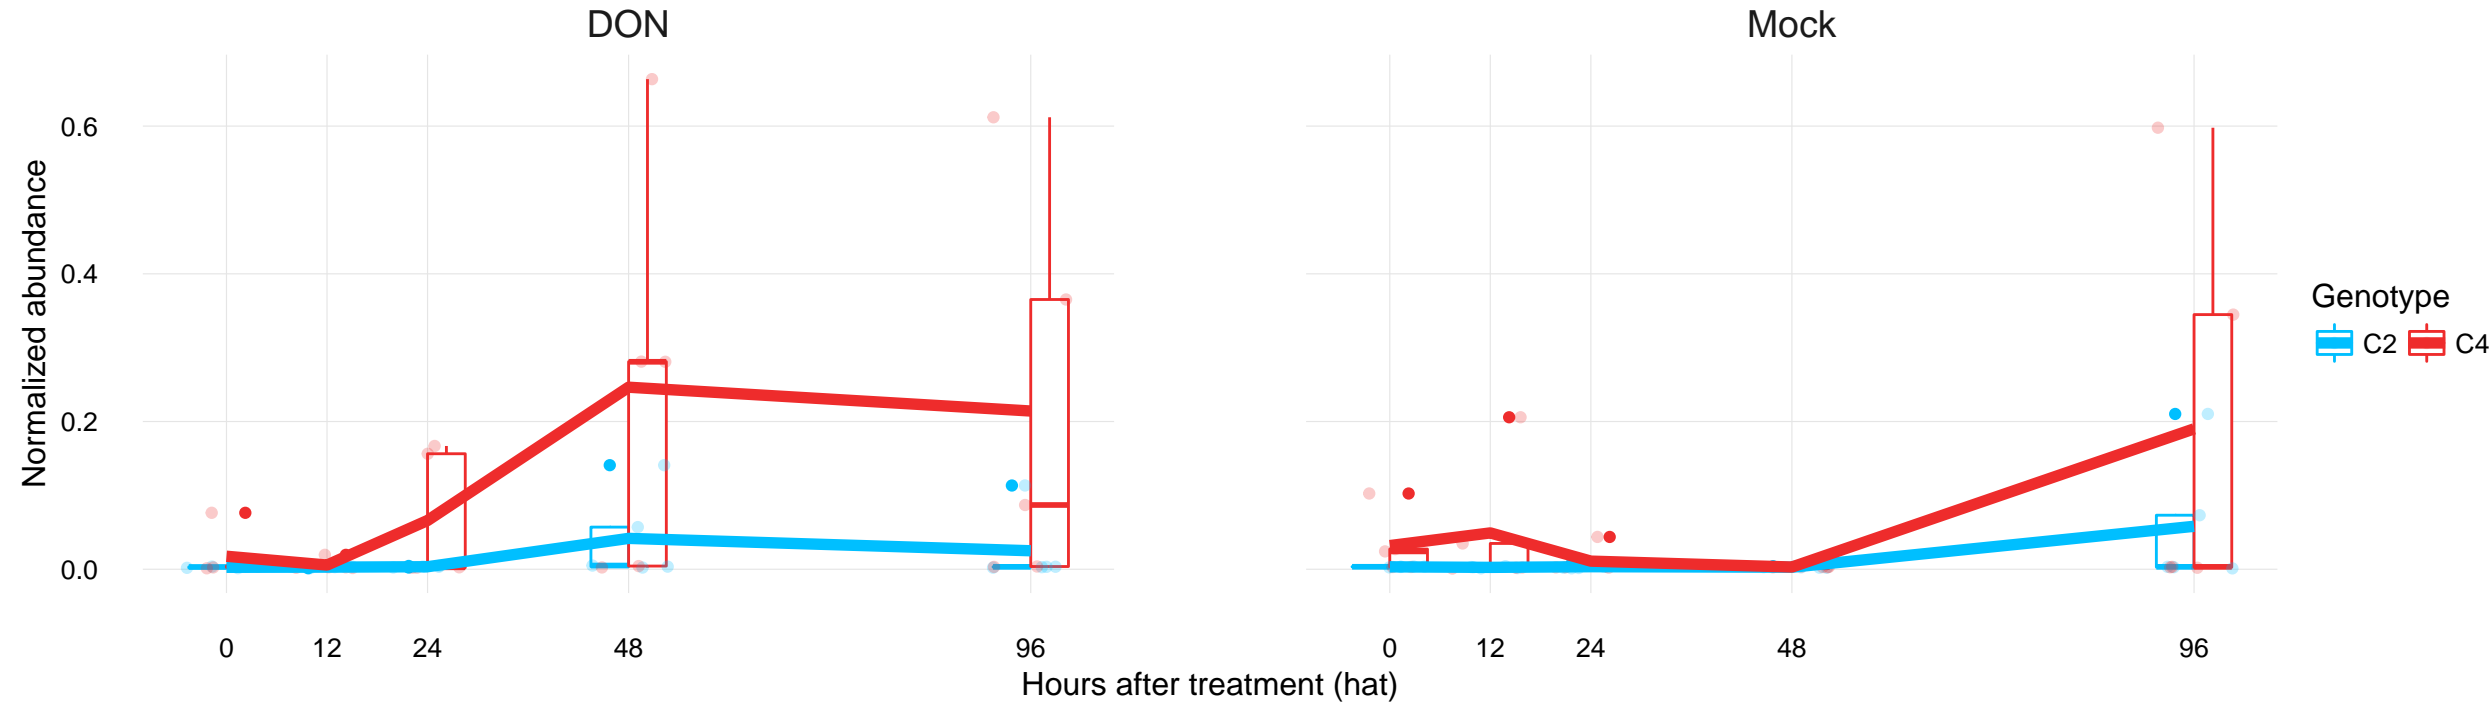

## CM, Remus; different treatments

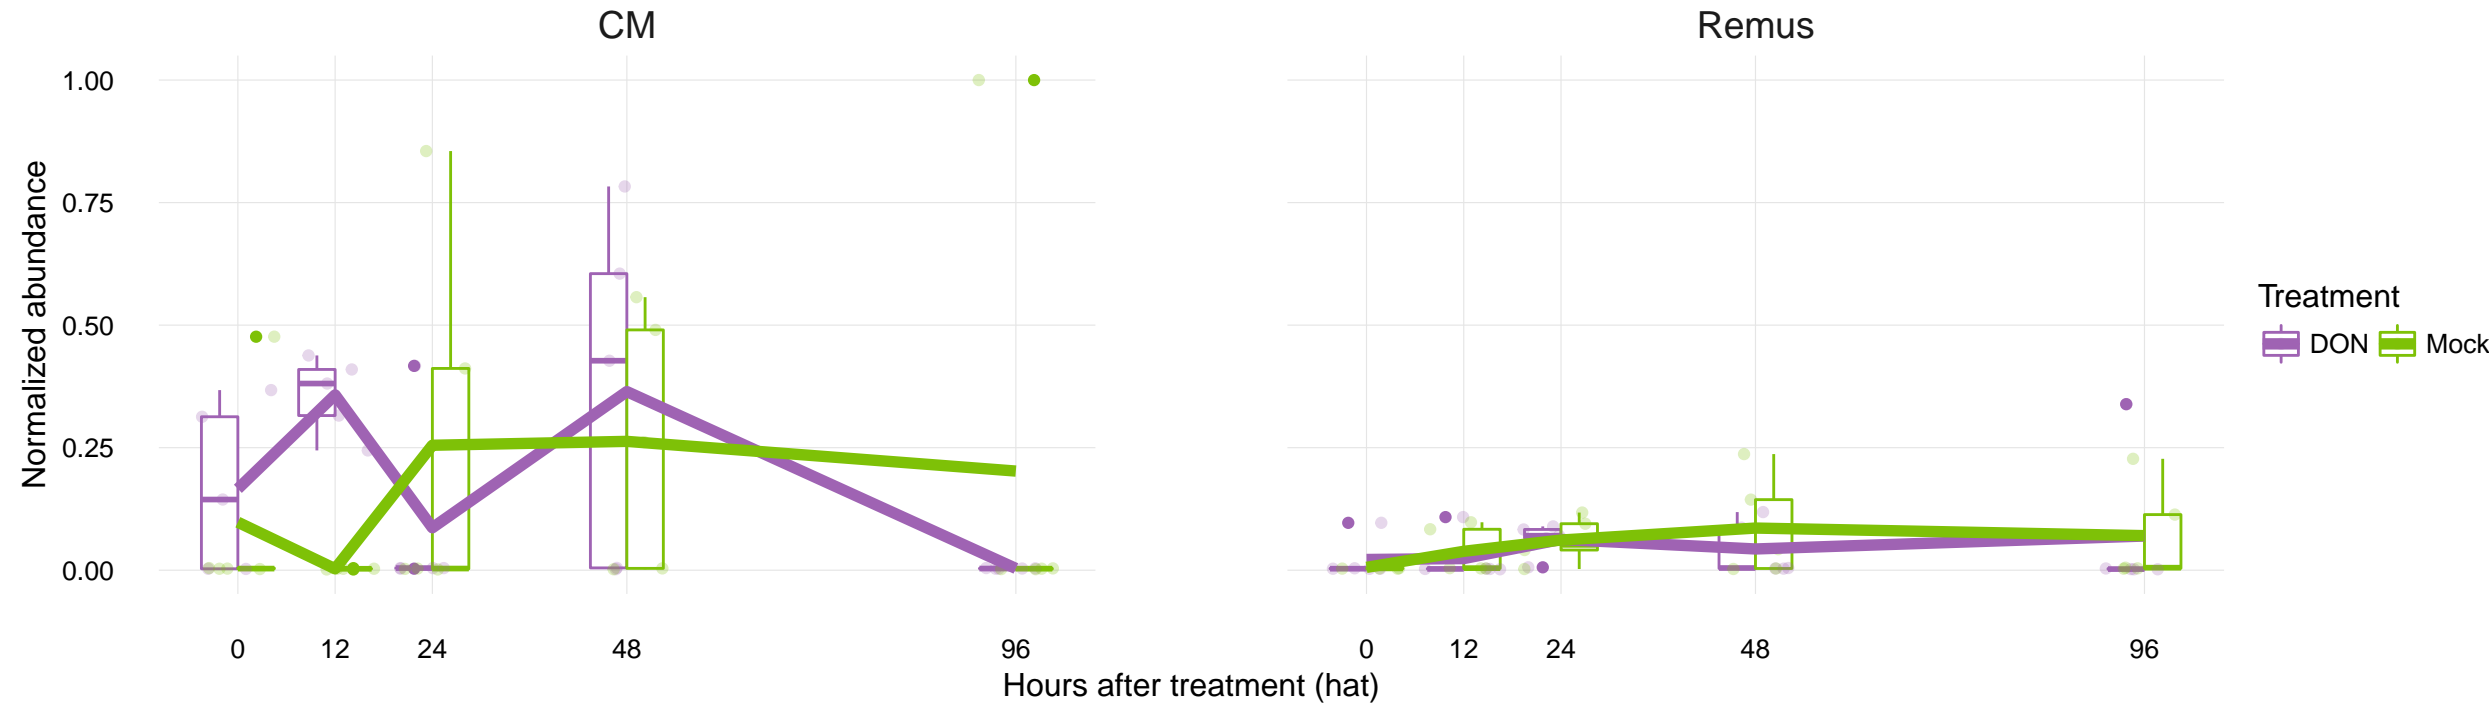

## DON, Mock; all four genotypes

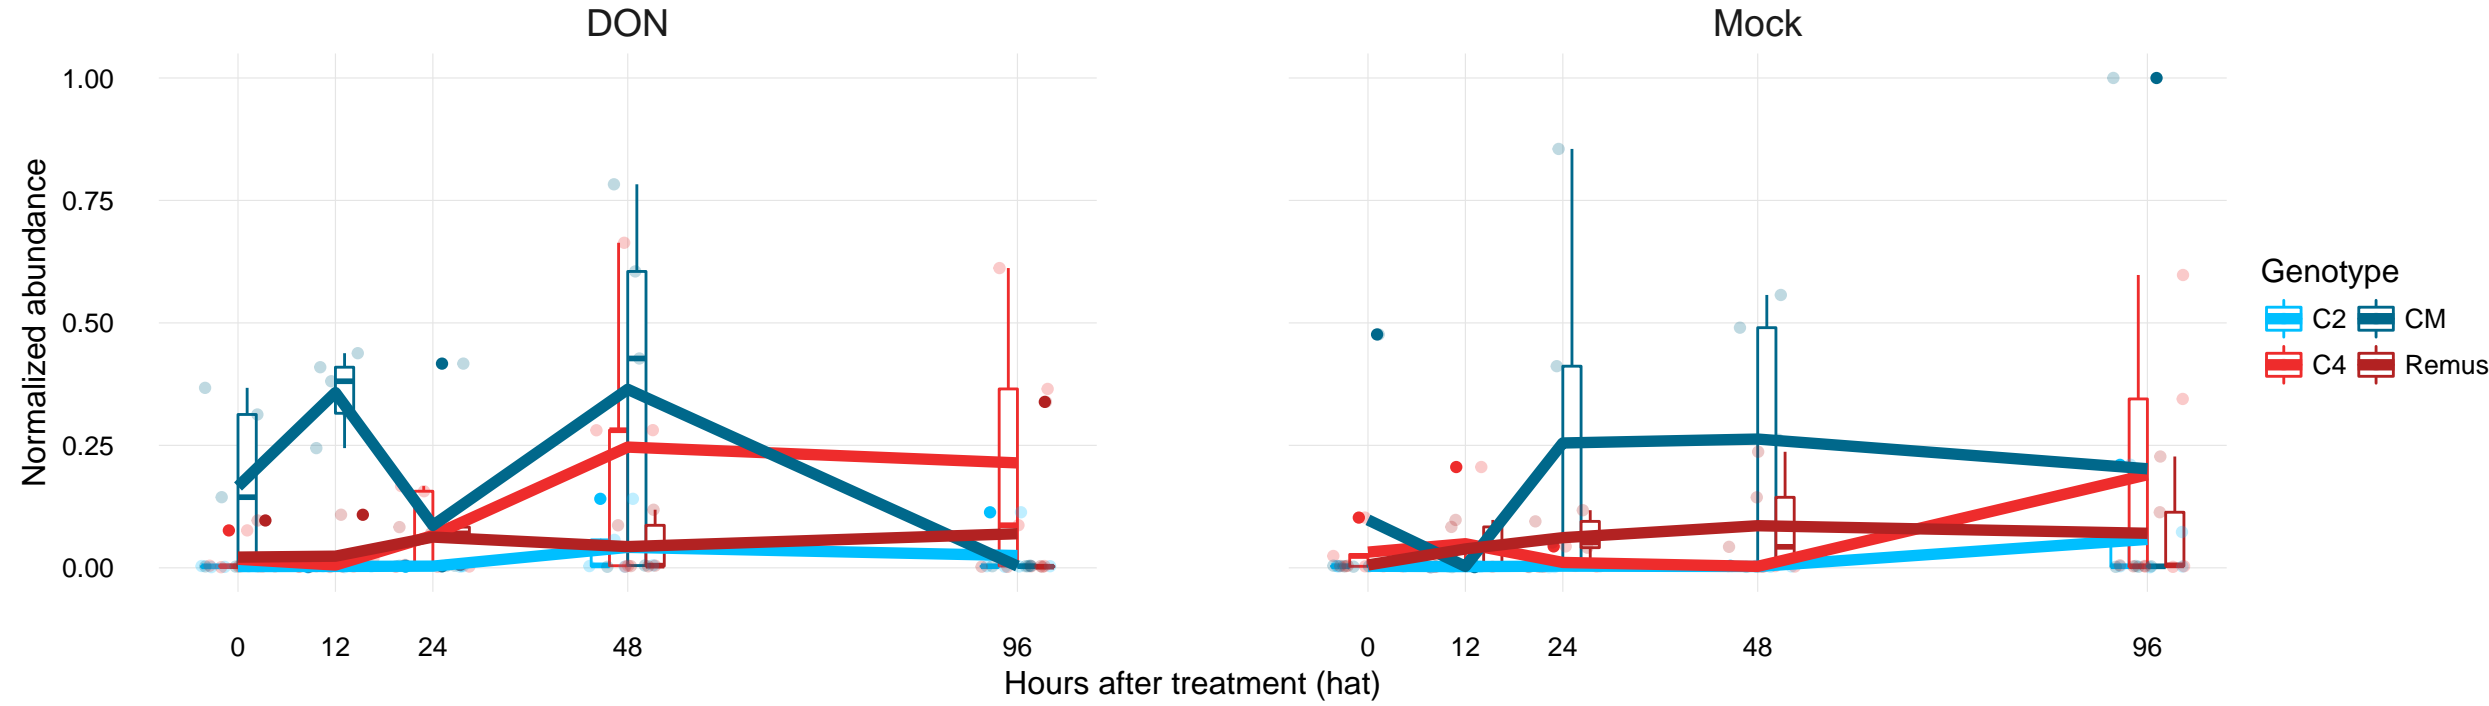

# Chlorogenic acid

Identified metabolite (level 1)

|                |                          |
|----------------|--------------------------|
| MZ             | 377.0846                 |
| RT             | 9.54 min                 |
| Normalization  | Directly via KPX samples |
| Cluster        | –                        |
| Cn total / Phe | 16 /                     |

C2, C4; different treatments

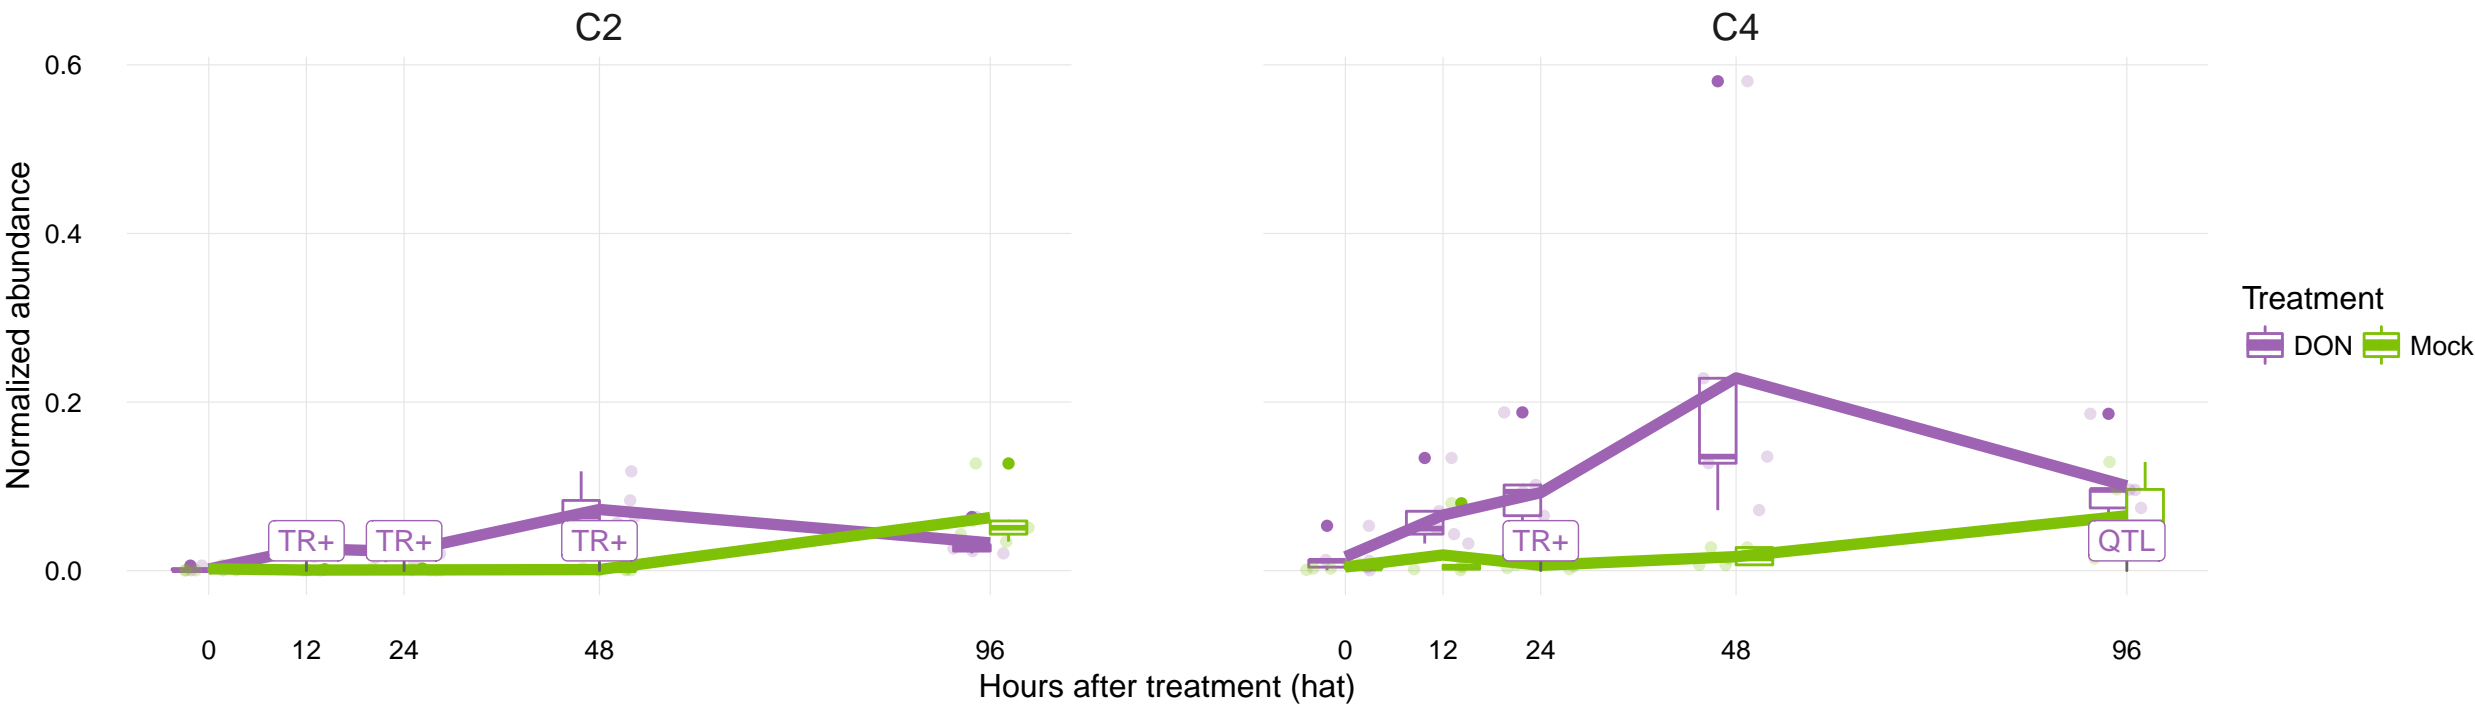

DON, Mock; different genotypes

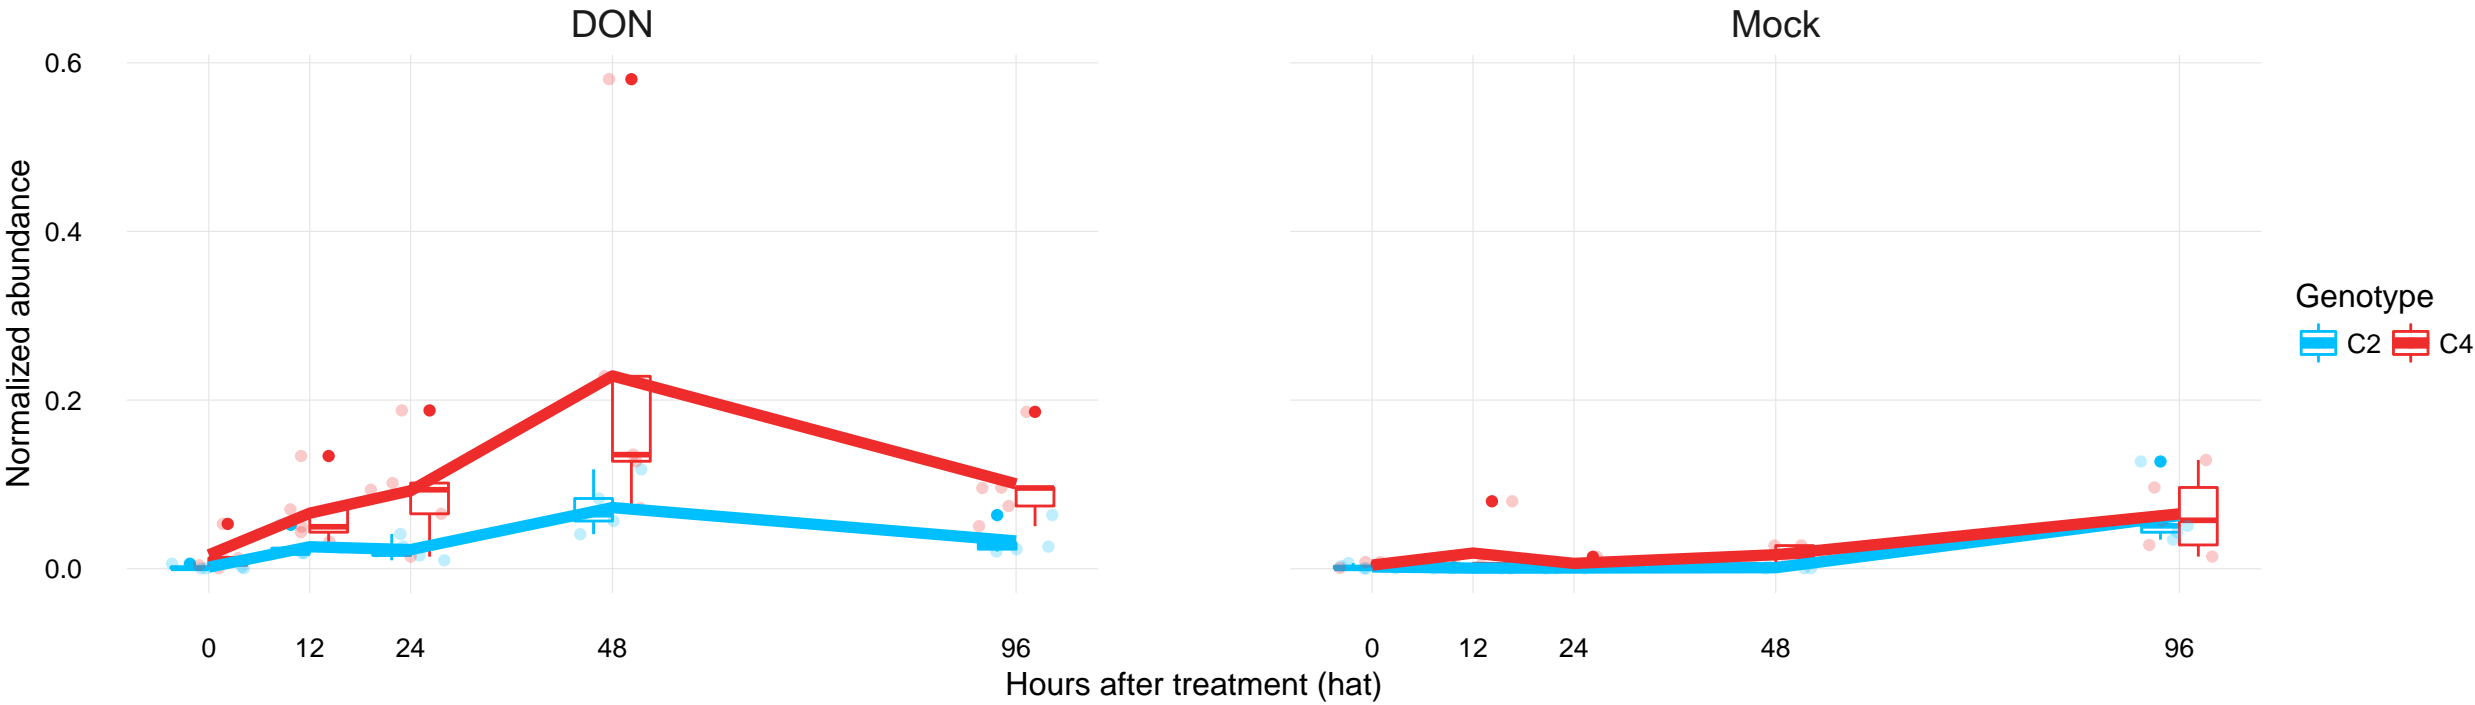

CM, Remus; different treatments

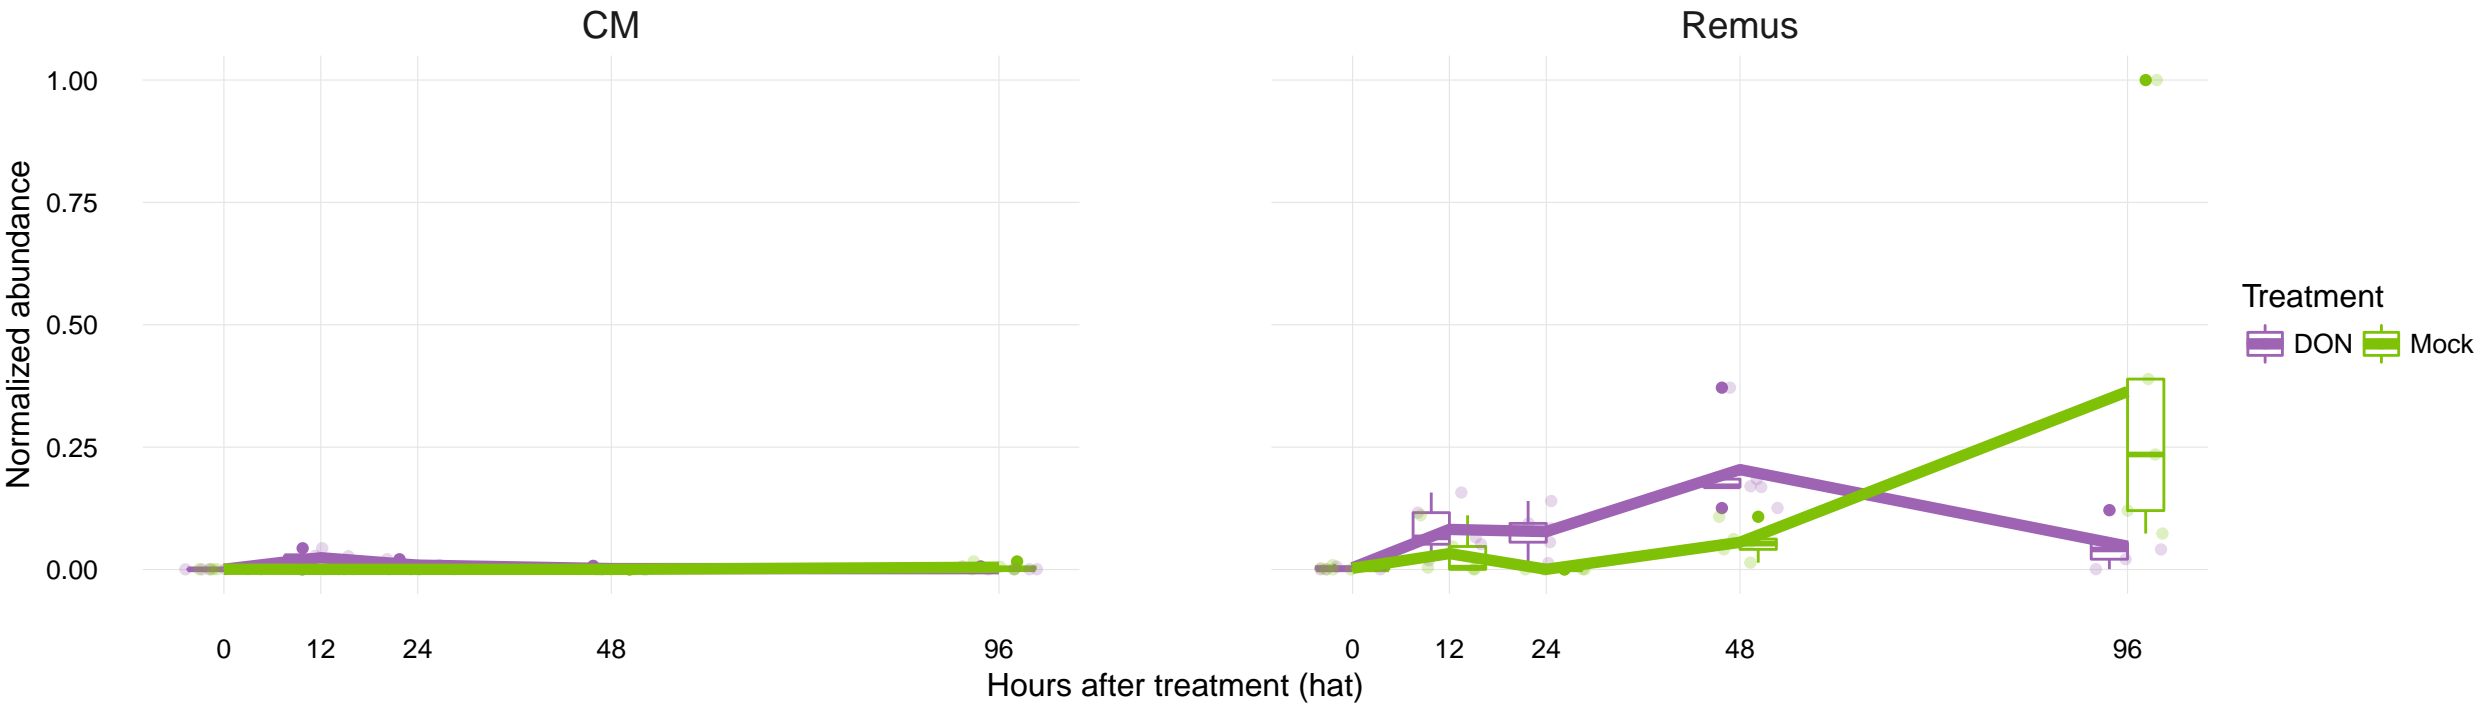

DON, Mock; all four genotypes

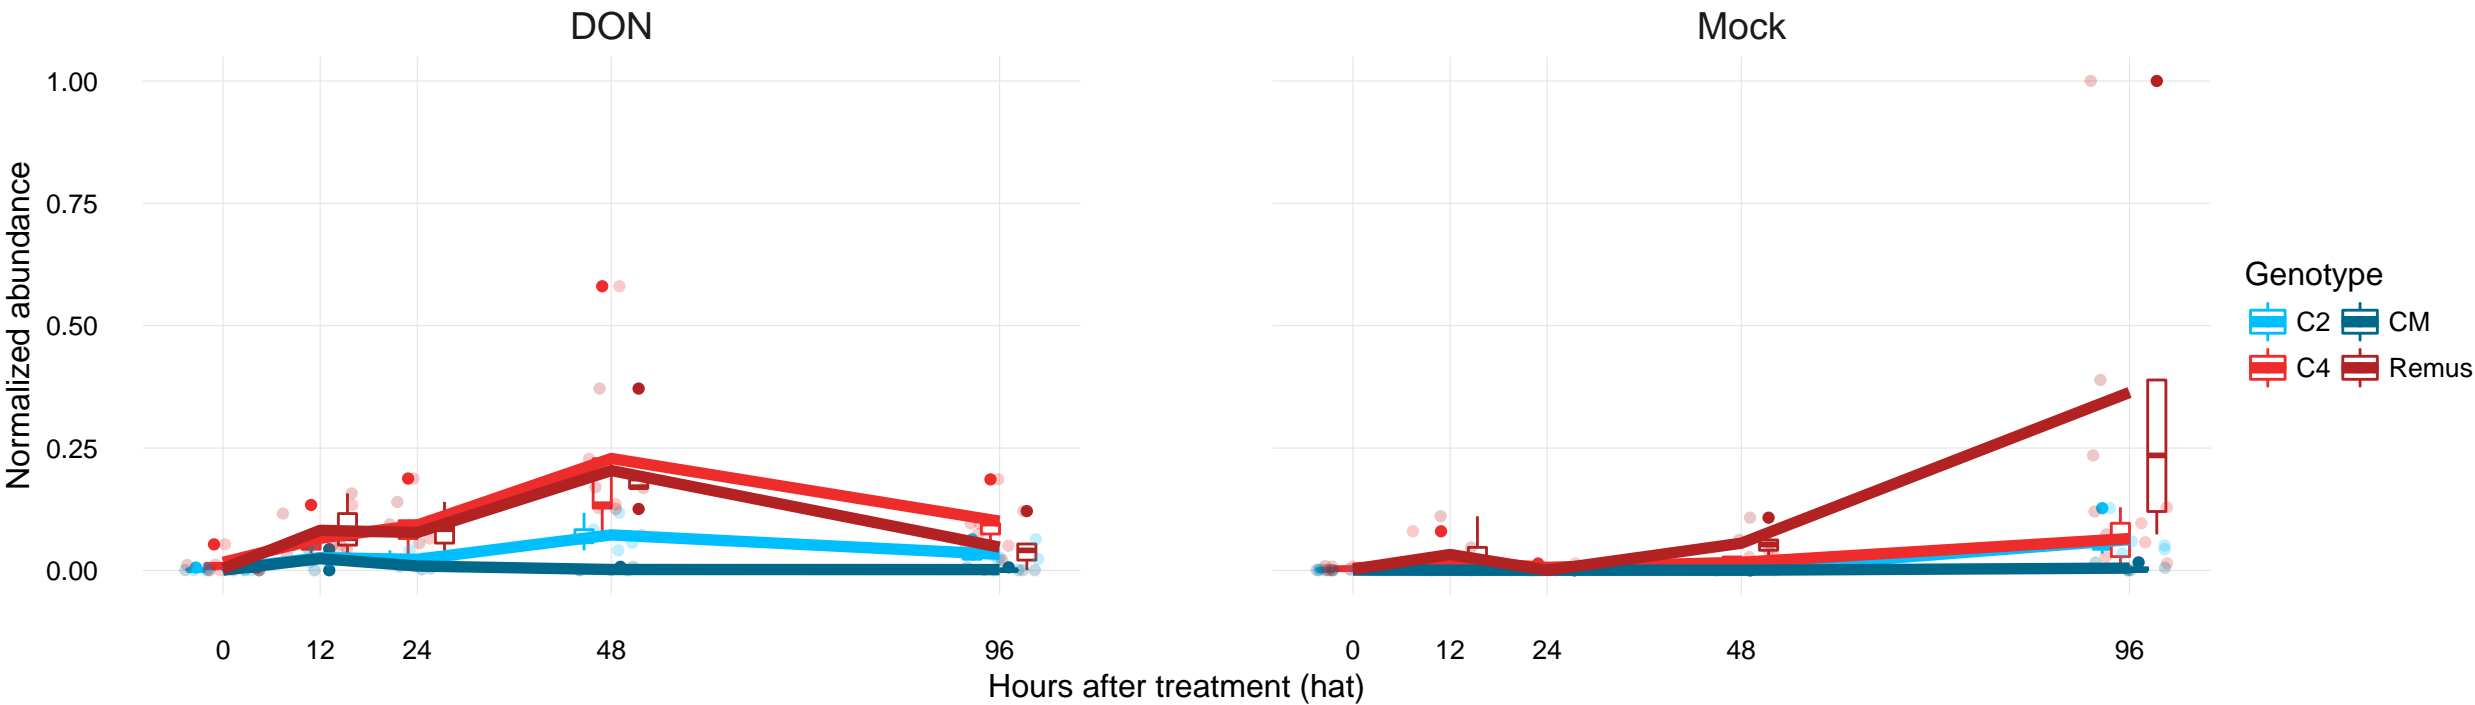

# A.105

Annotated as HCA derivative  
(1 database hit)

|                |                                                |
|----------------|------------------------------------------------|
| MZ             | 313.1282                                       |
| RT             | 17.23 min                                      |
| Normalization  | Indirectly via surrogate<br>in the KPX samples |
| Cluster        | —                                              |
| Cn total / Phe | 15 /                                           |

## C2, C4; different treatments

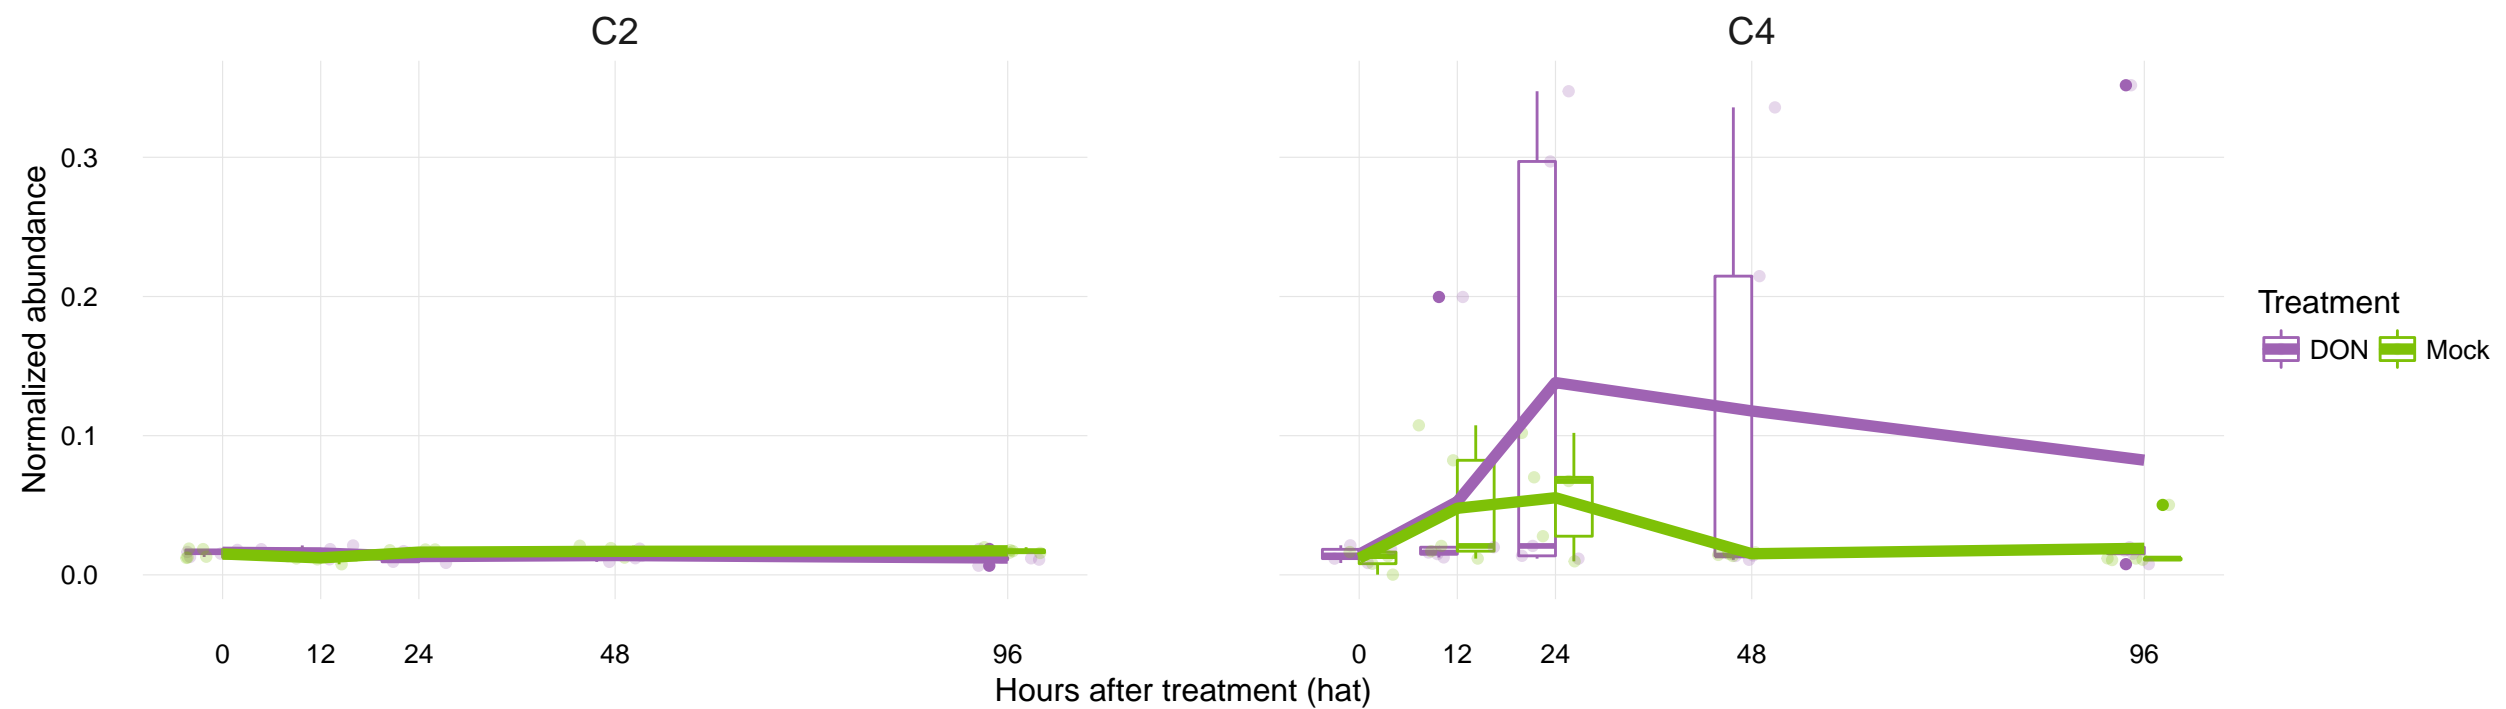

## DON, Mock; different genotypes

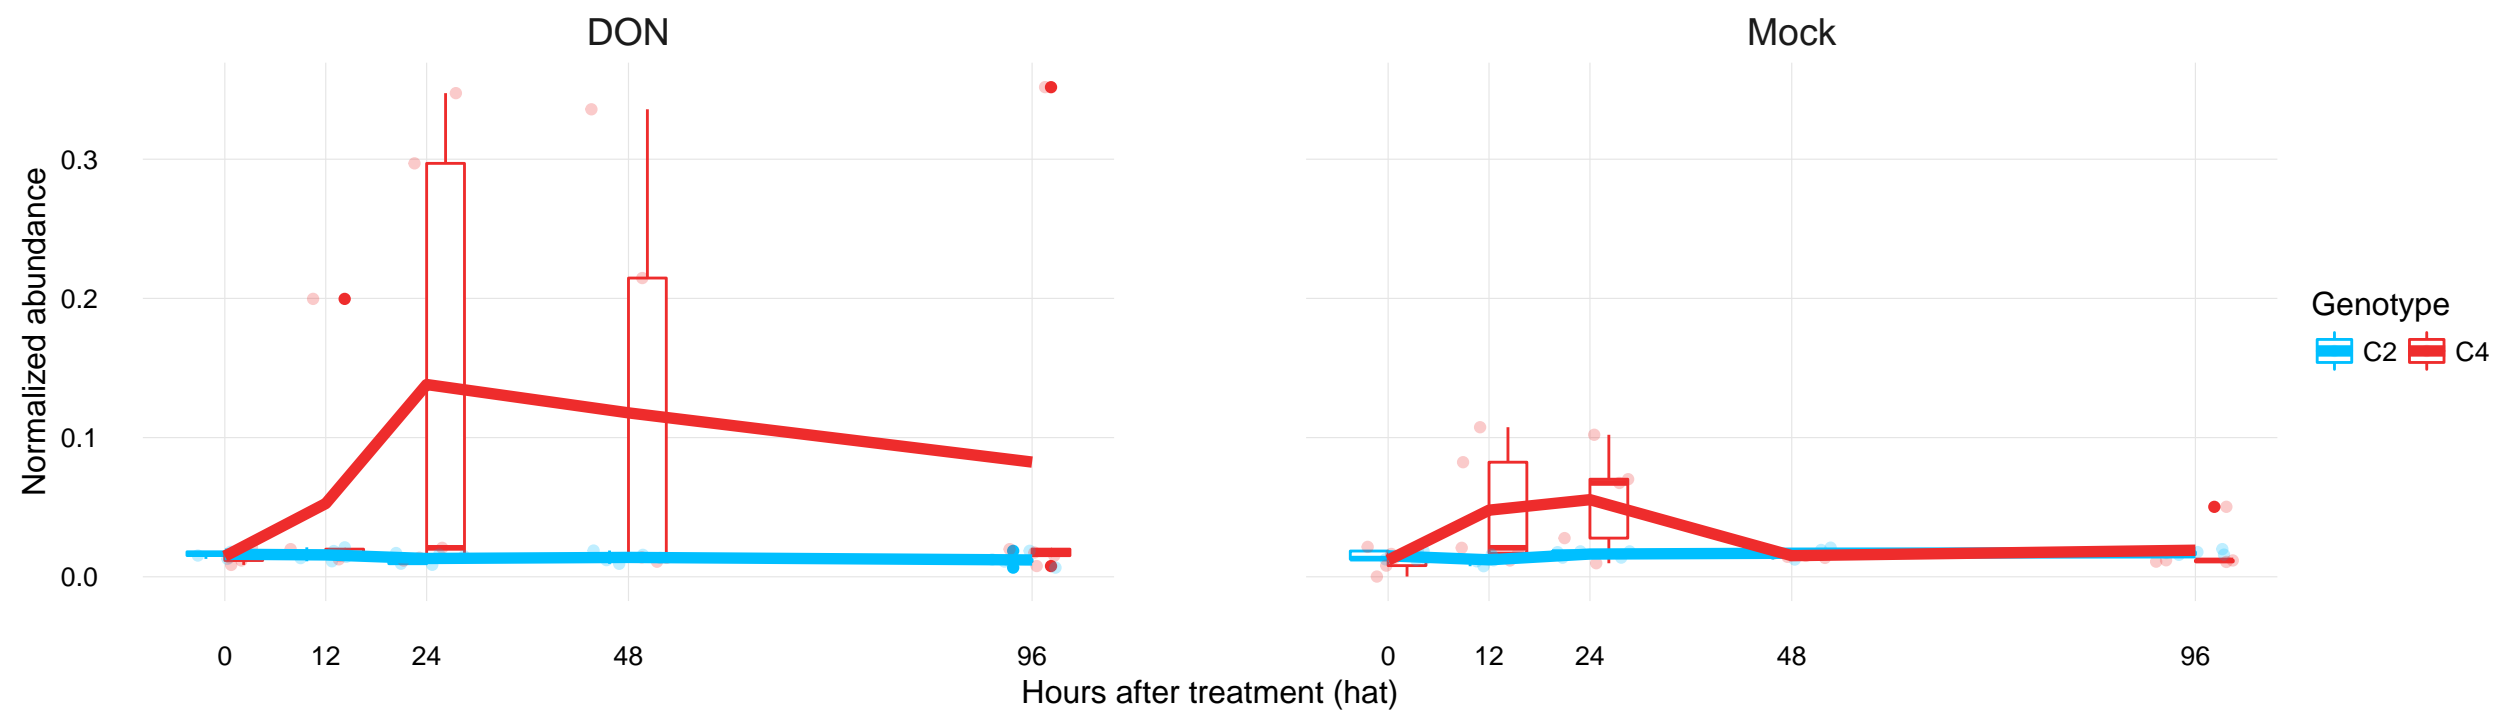

## CM, Remus; different treatments

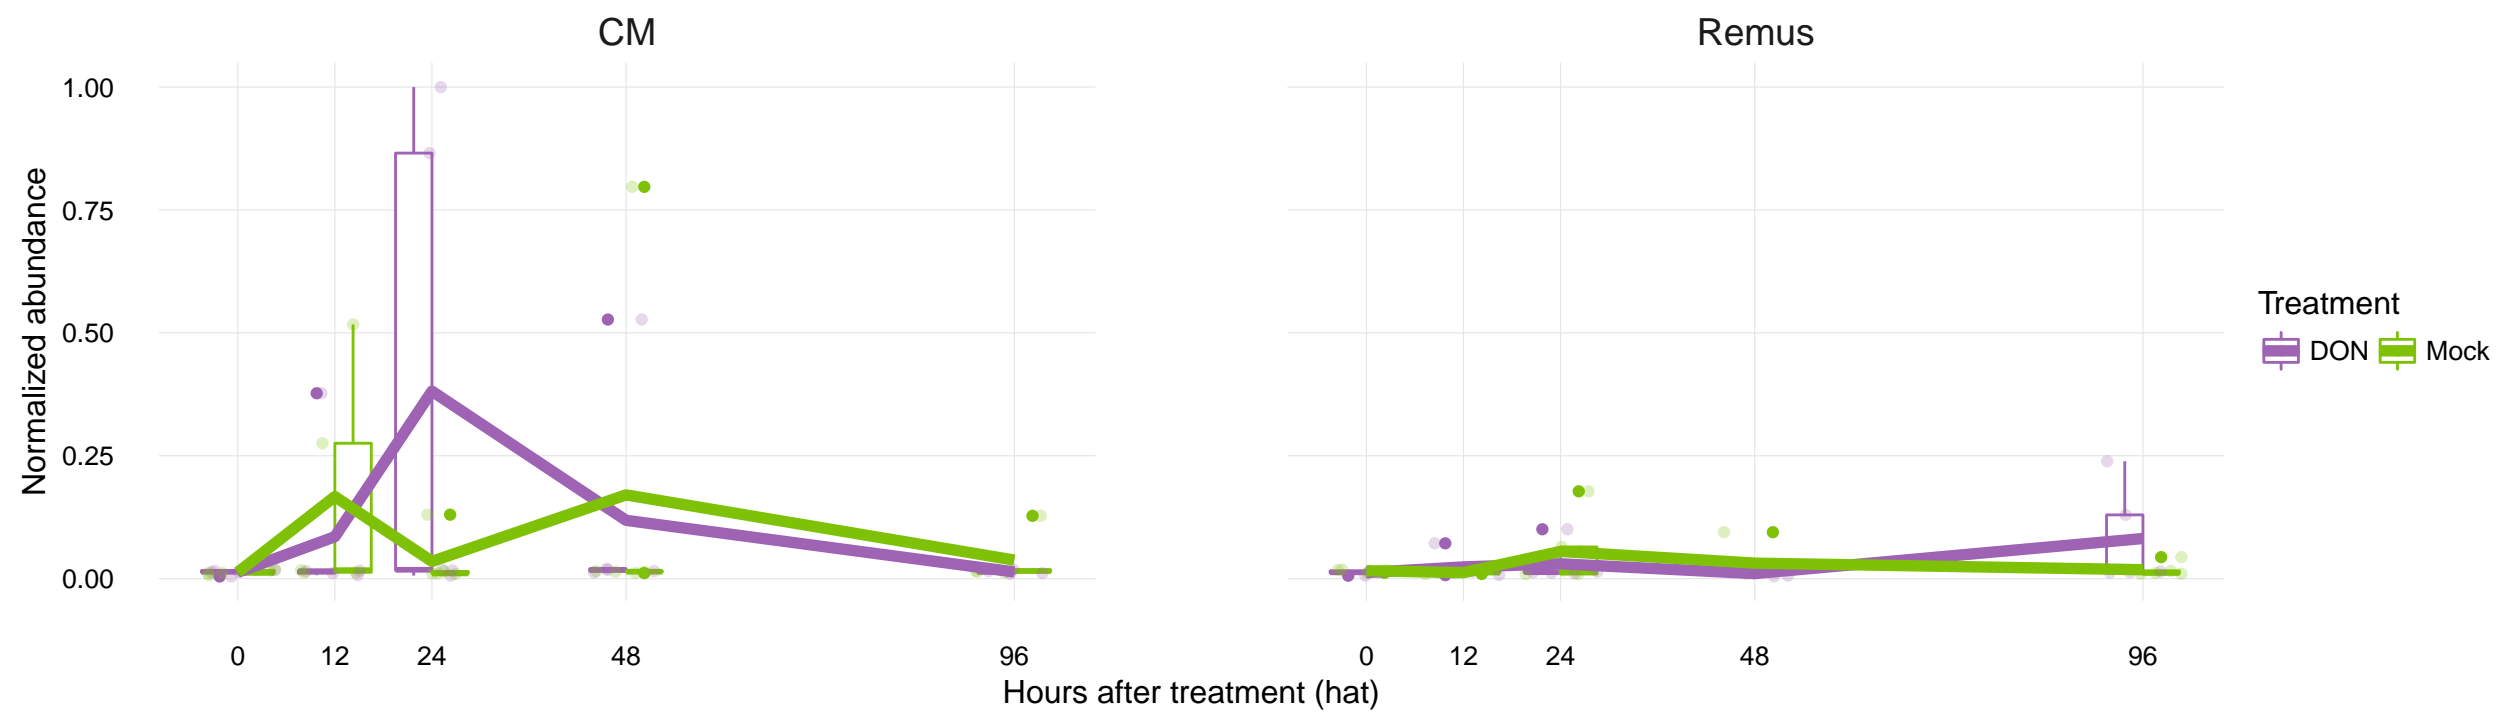

## DON, Mock; all four genotypes

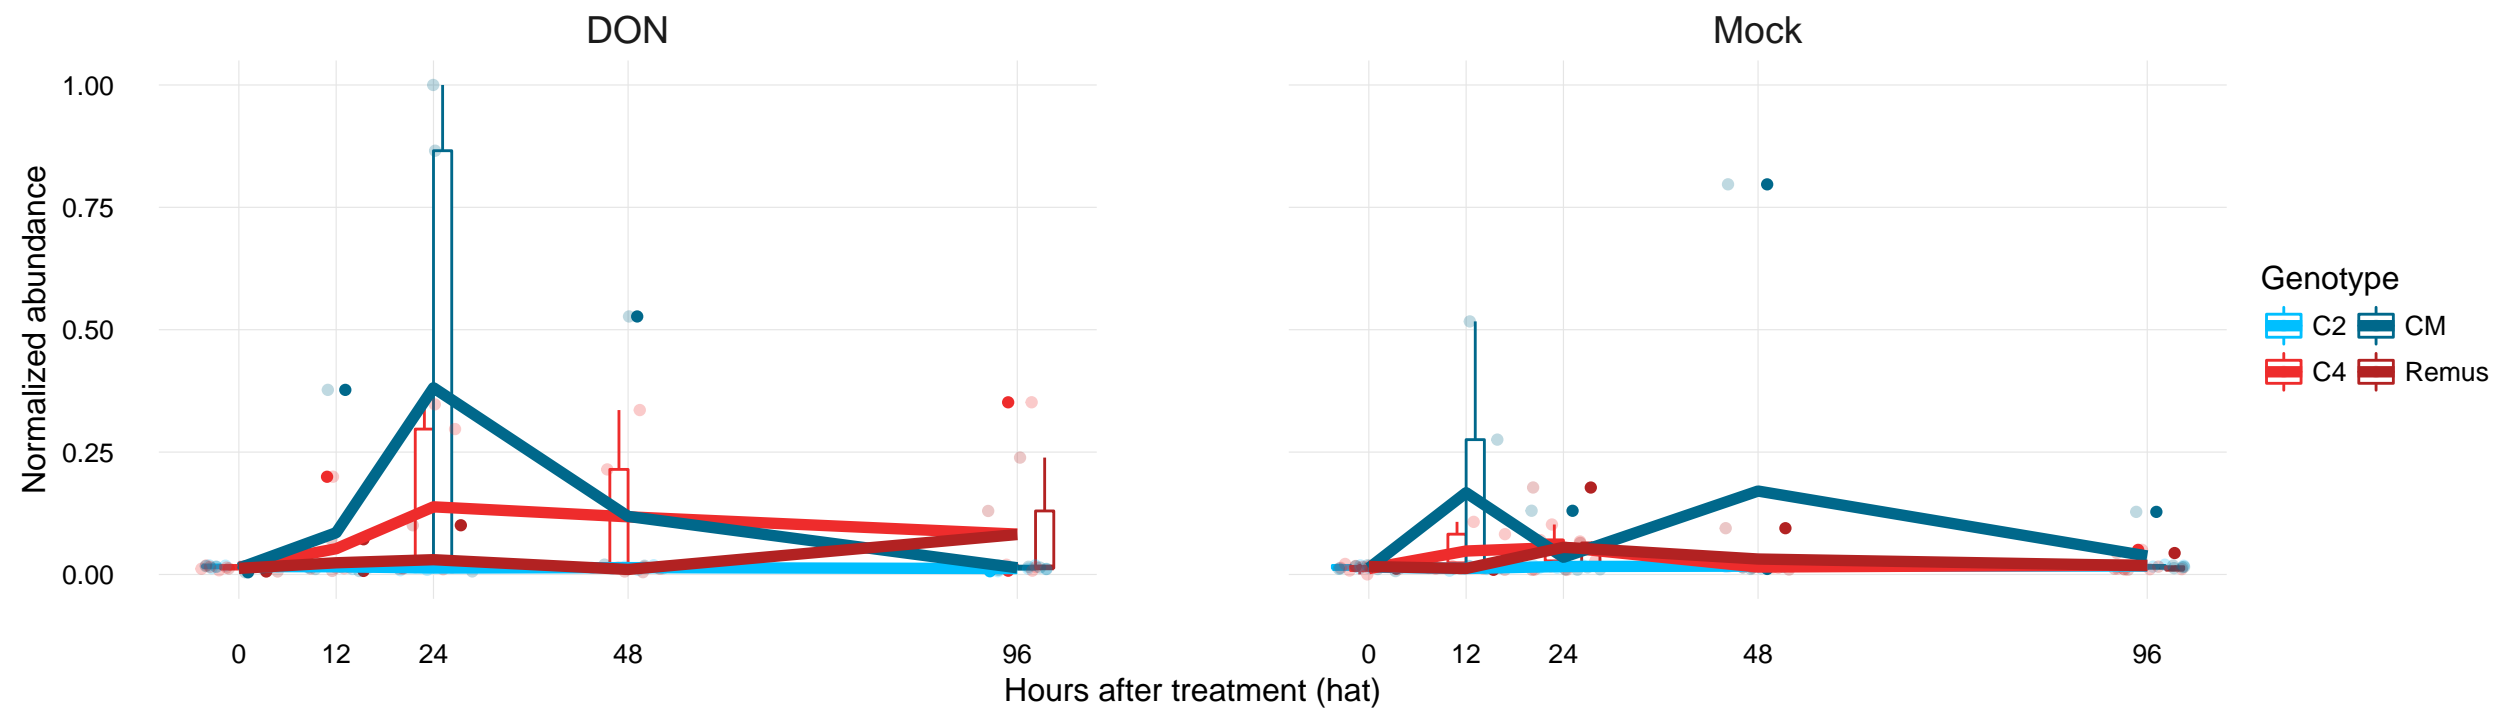

# A.5

Annotated as others (Phenol)  
(1 database hit)

|                |                |
|----------------|----------------|
| MZ             | 127.039        |
| RT             | 4.18 min       |
| Normalization  | Not normalized |
| Cluster        | –              |
| Cn total / Phe | 6 /            |

## C2, C4; different treatments

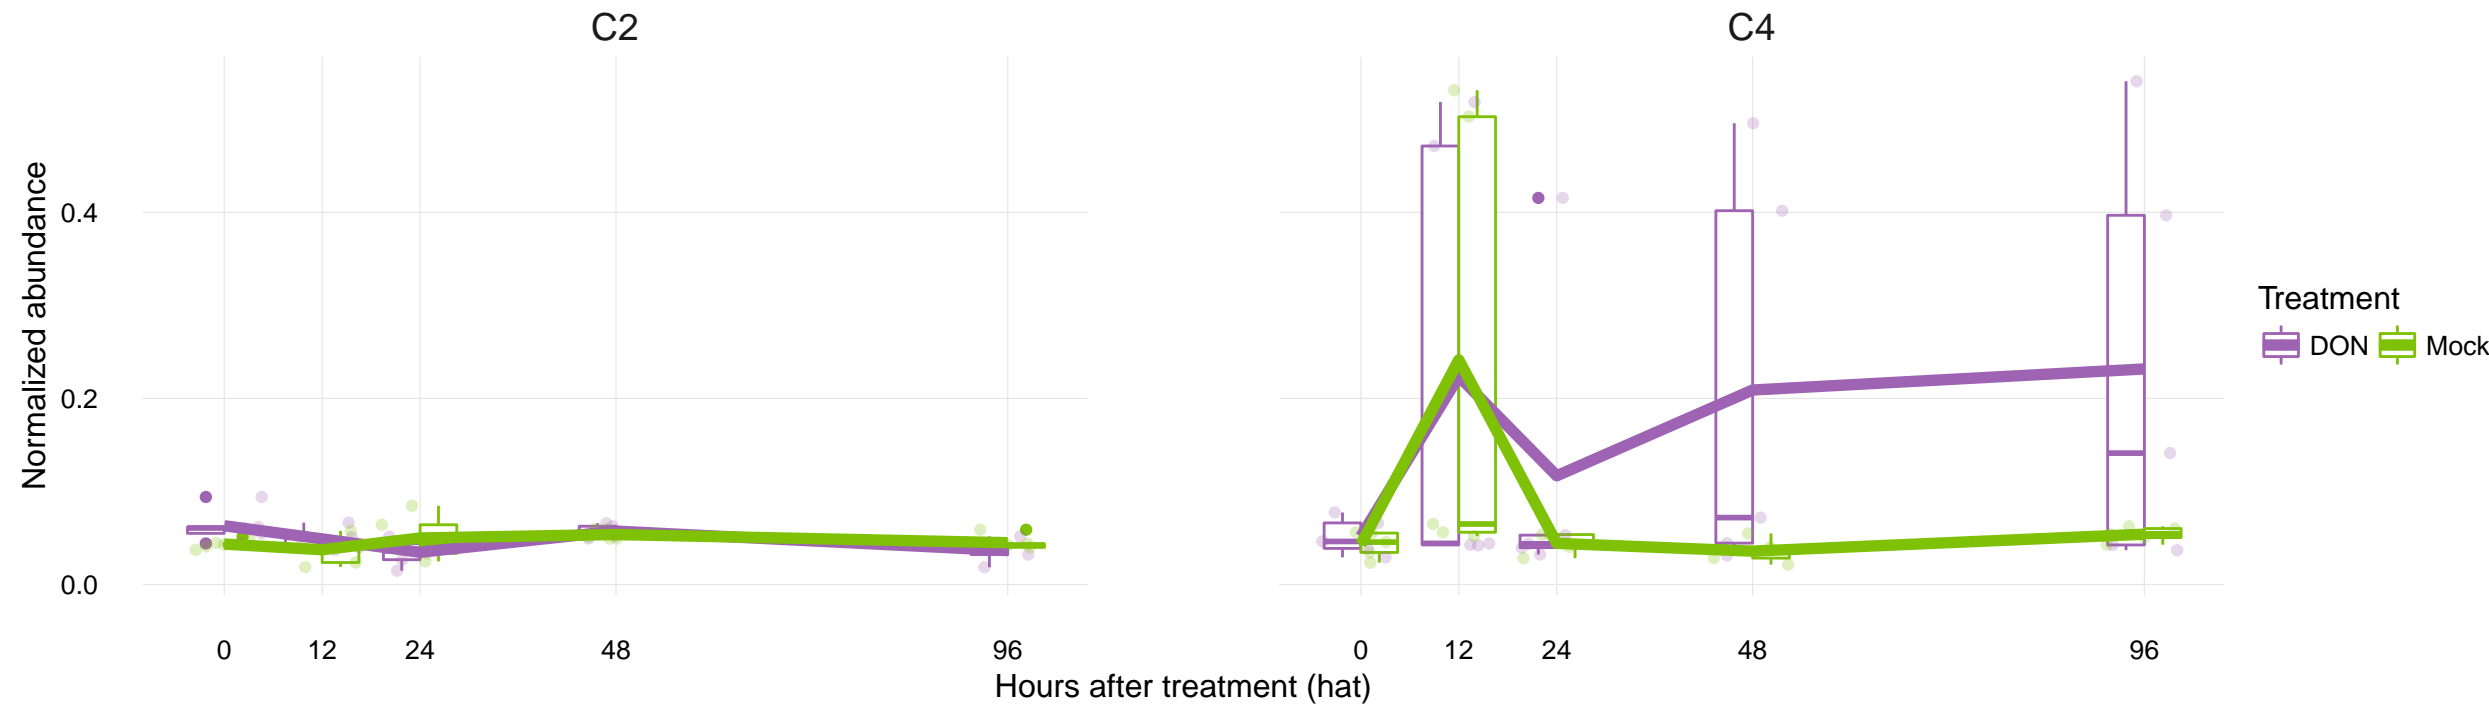

## DON, Mock; different genotypes

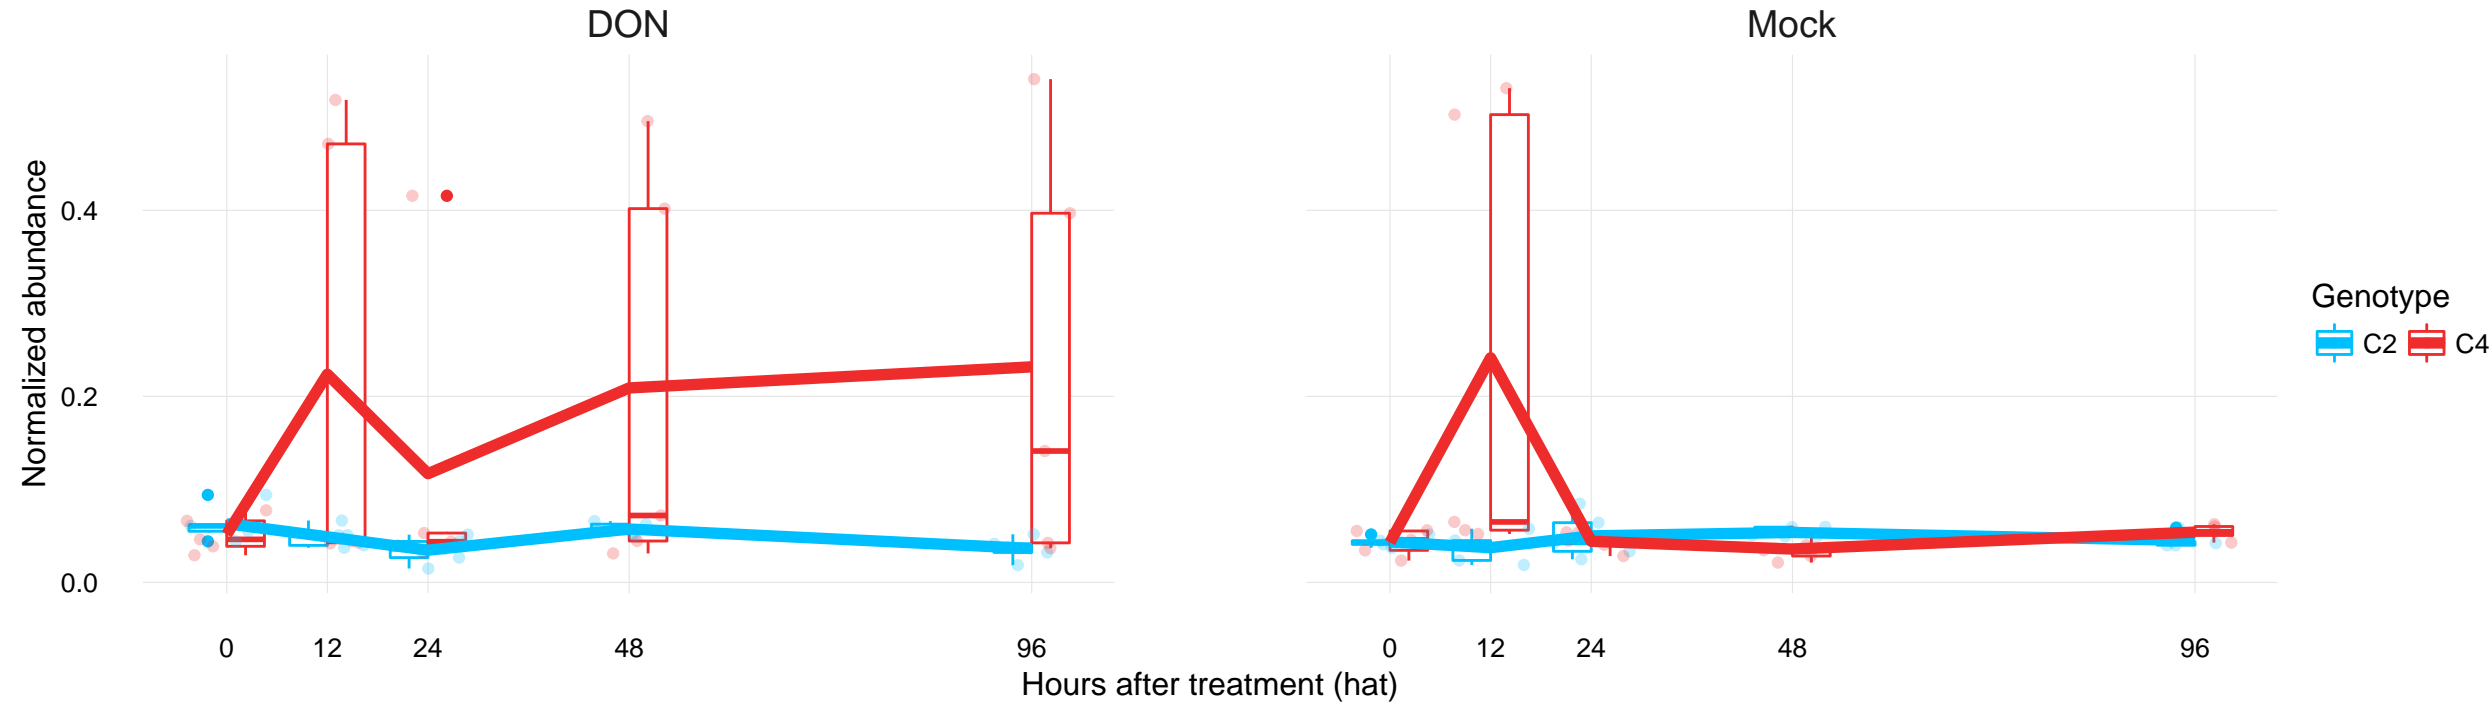

## CM, Remus; different treatments

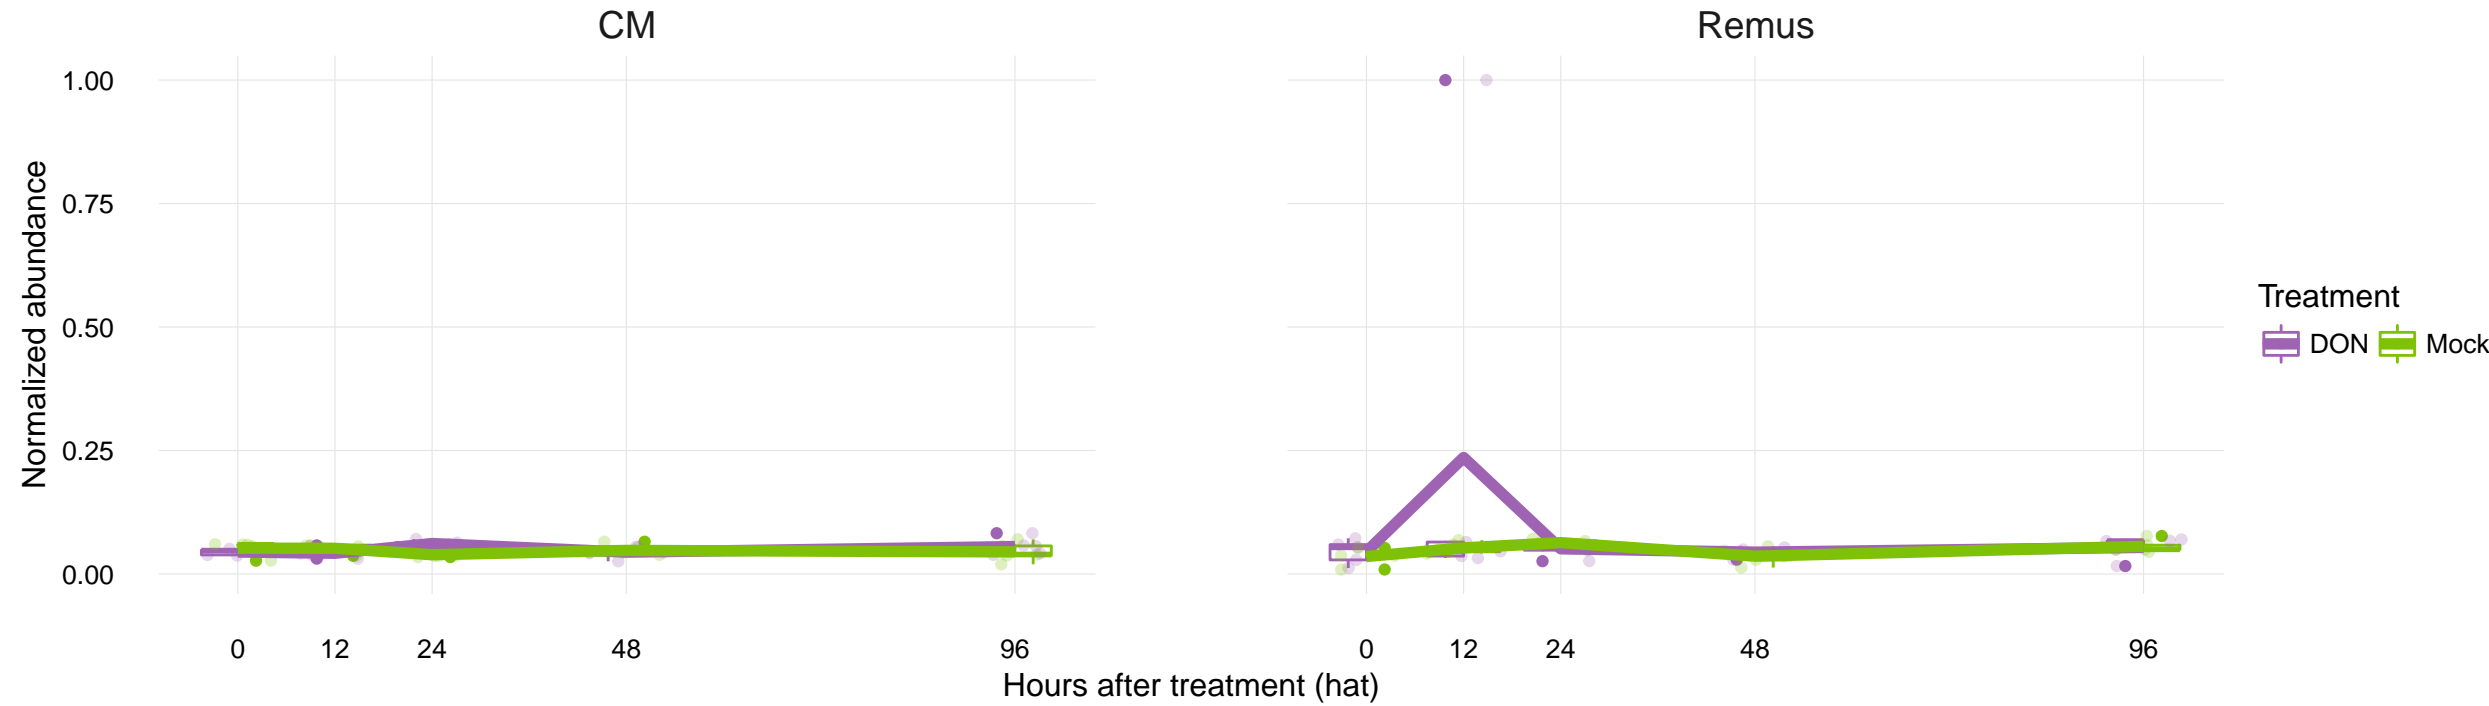

## DON, Mock; all four genotypes

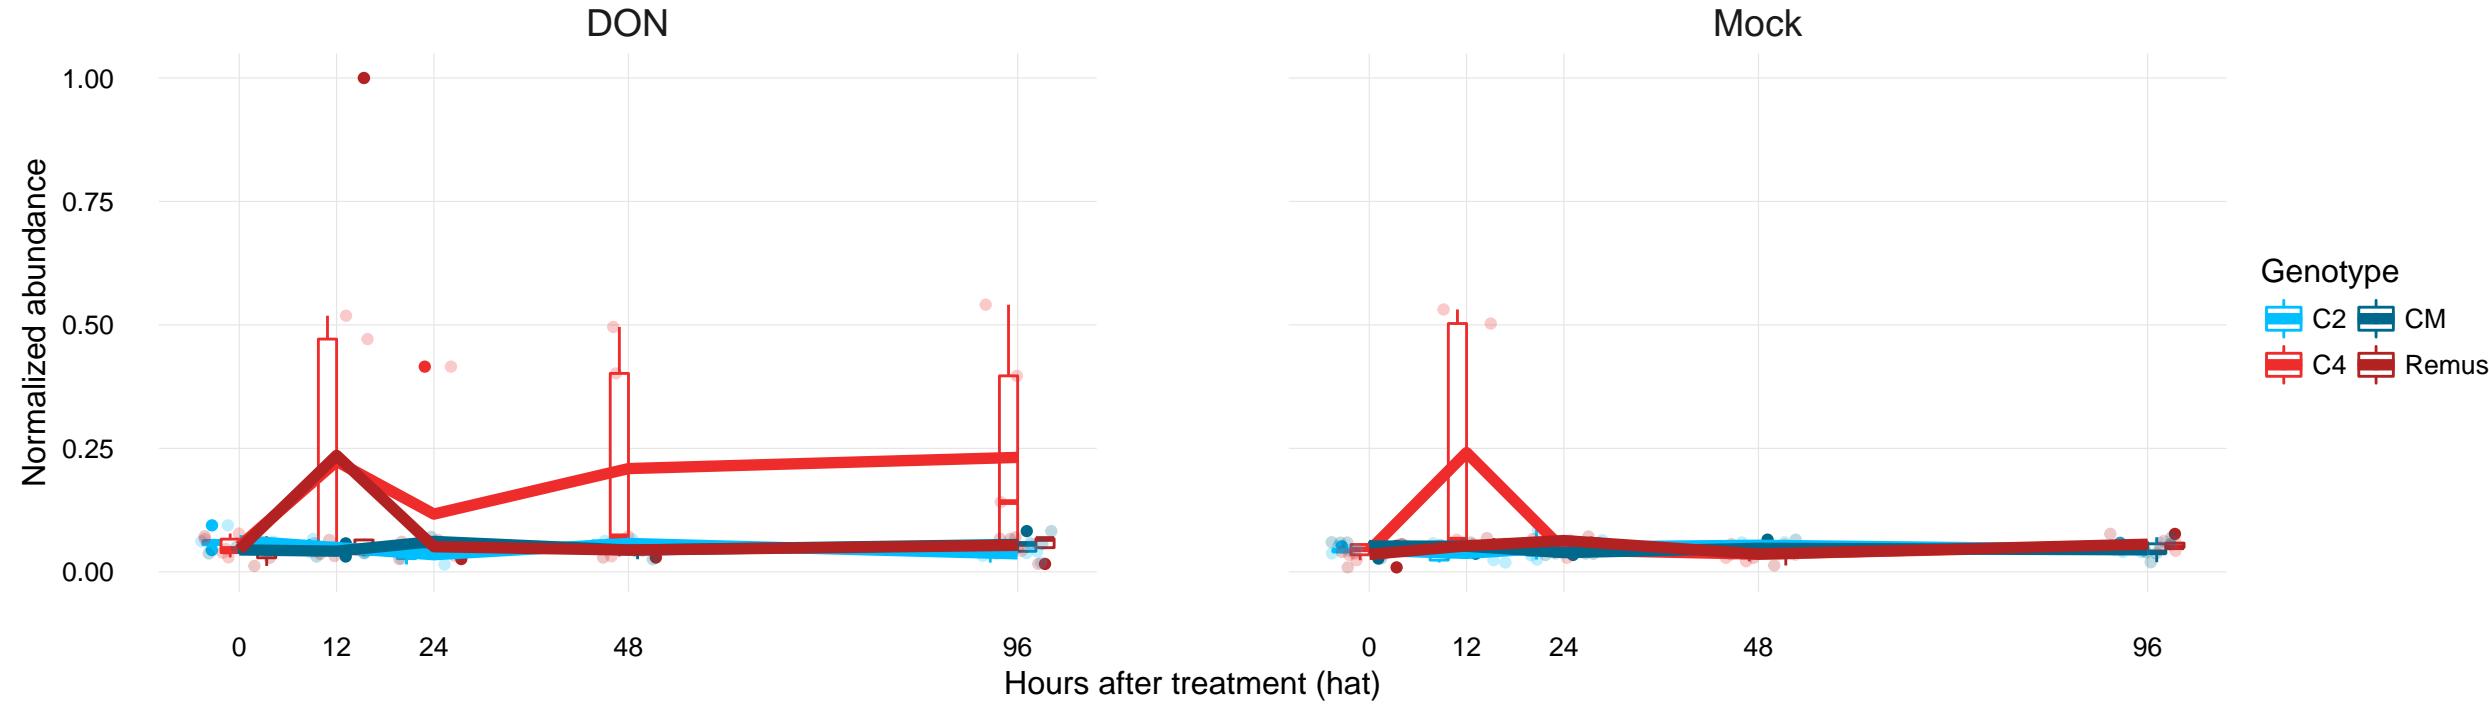

# A.17

Annotated as HCA derivative  
(1 database hit)

|                |                          |
|----------------|--------------------------|
| MZ             | 335.1103                 |
| RT             | 7.29 min                 |
| Normalization  | Directly via KPX samples |
| Cluster        | –                        |
| Cn total / Phe | 15 /                     |

## C2, C4; different treatments

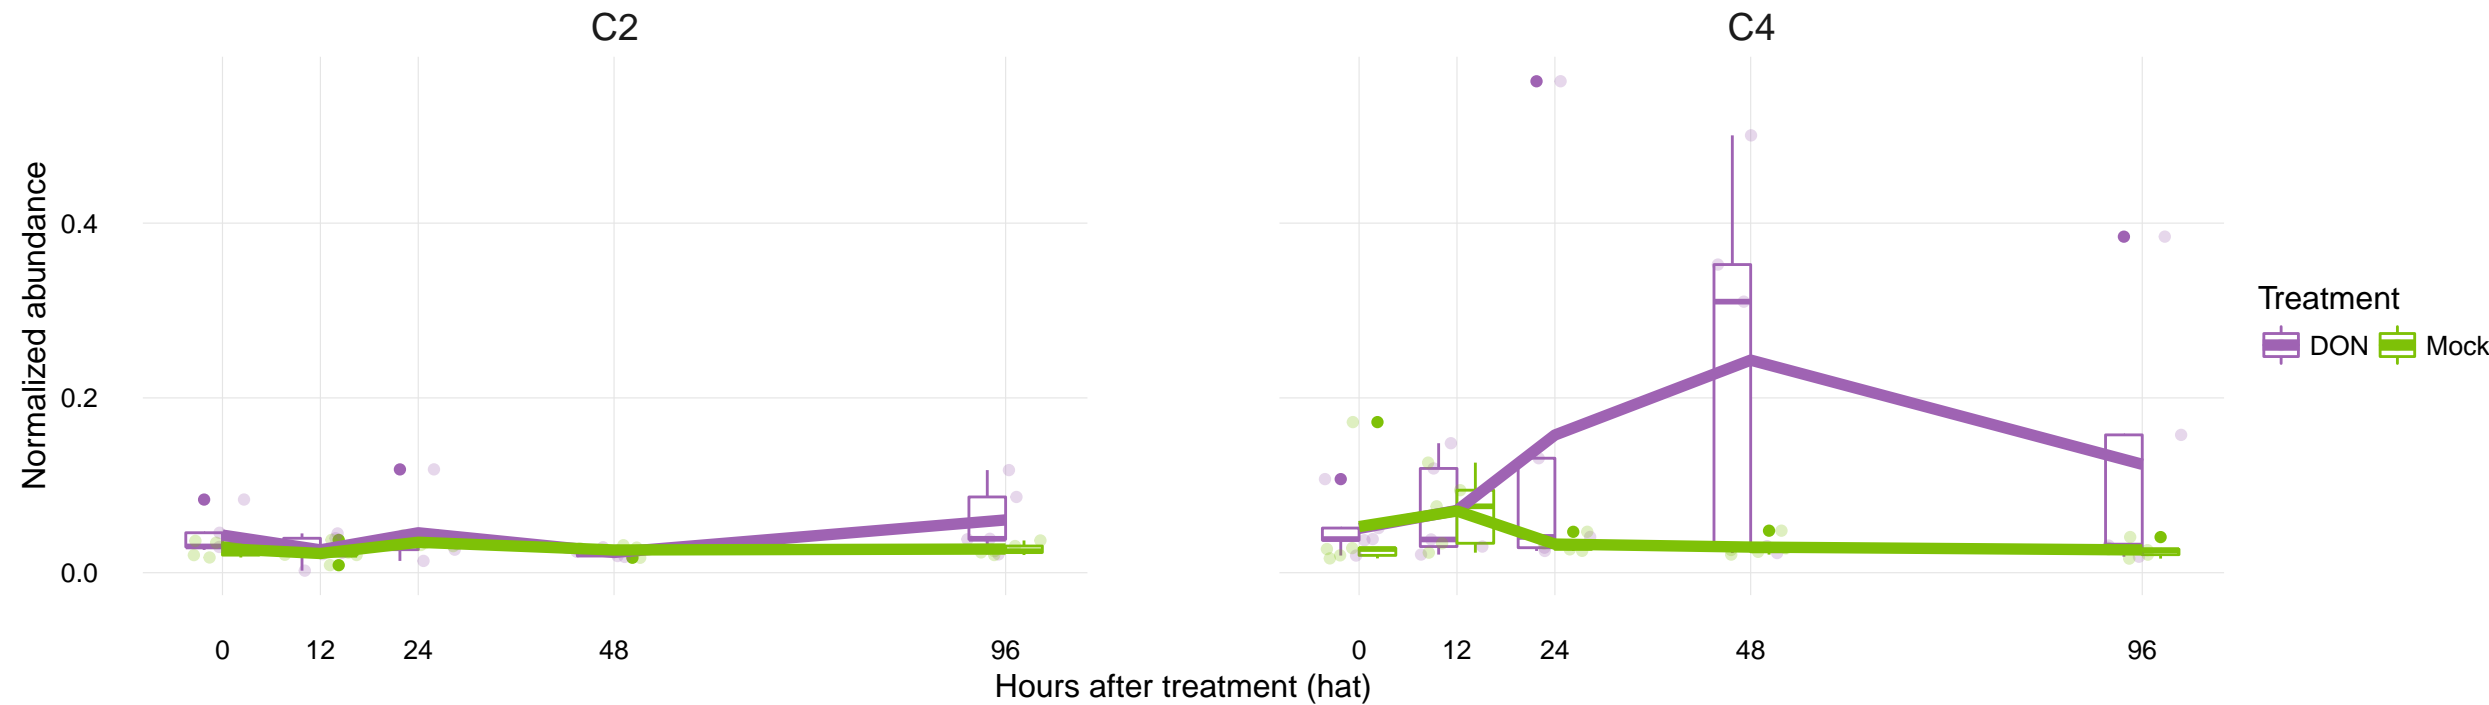

## DON, Mock; different genotypes

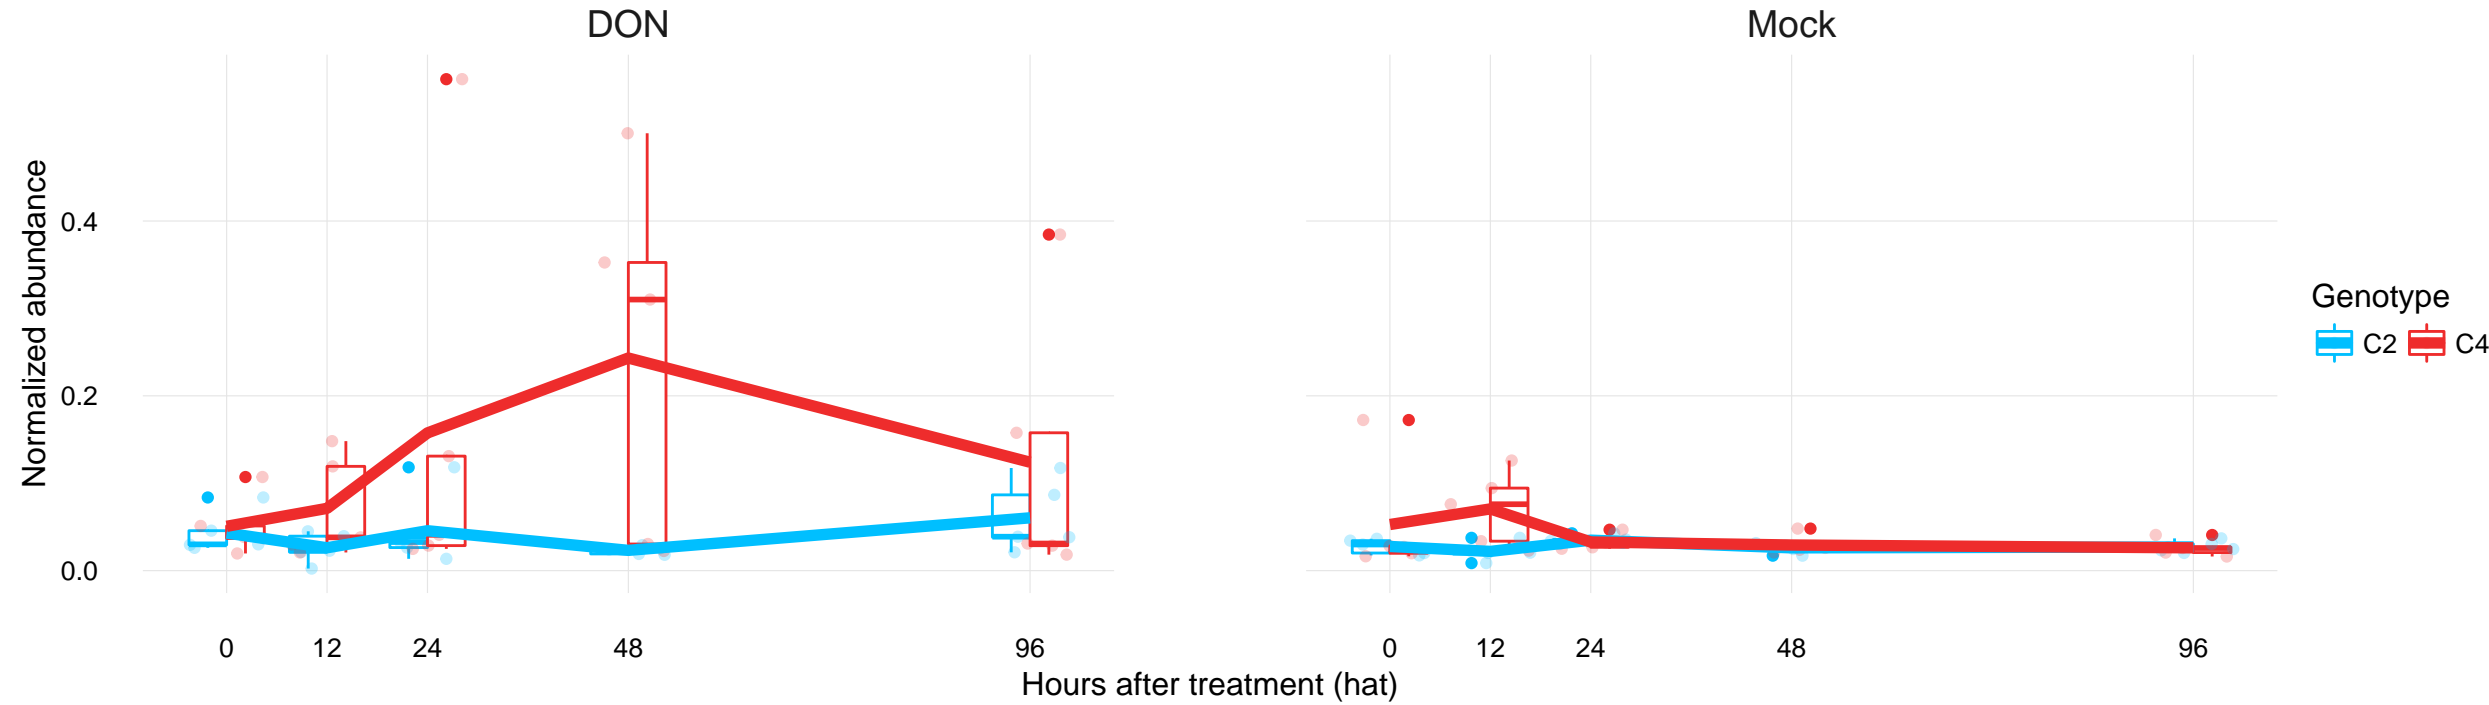

## CM, Remus; different treatments

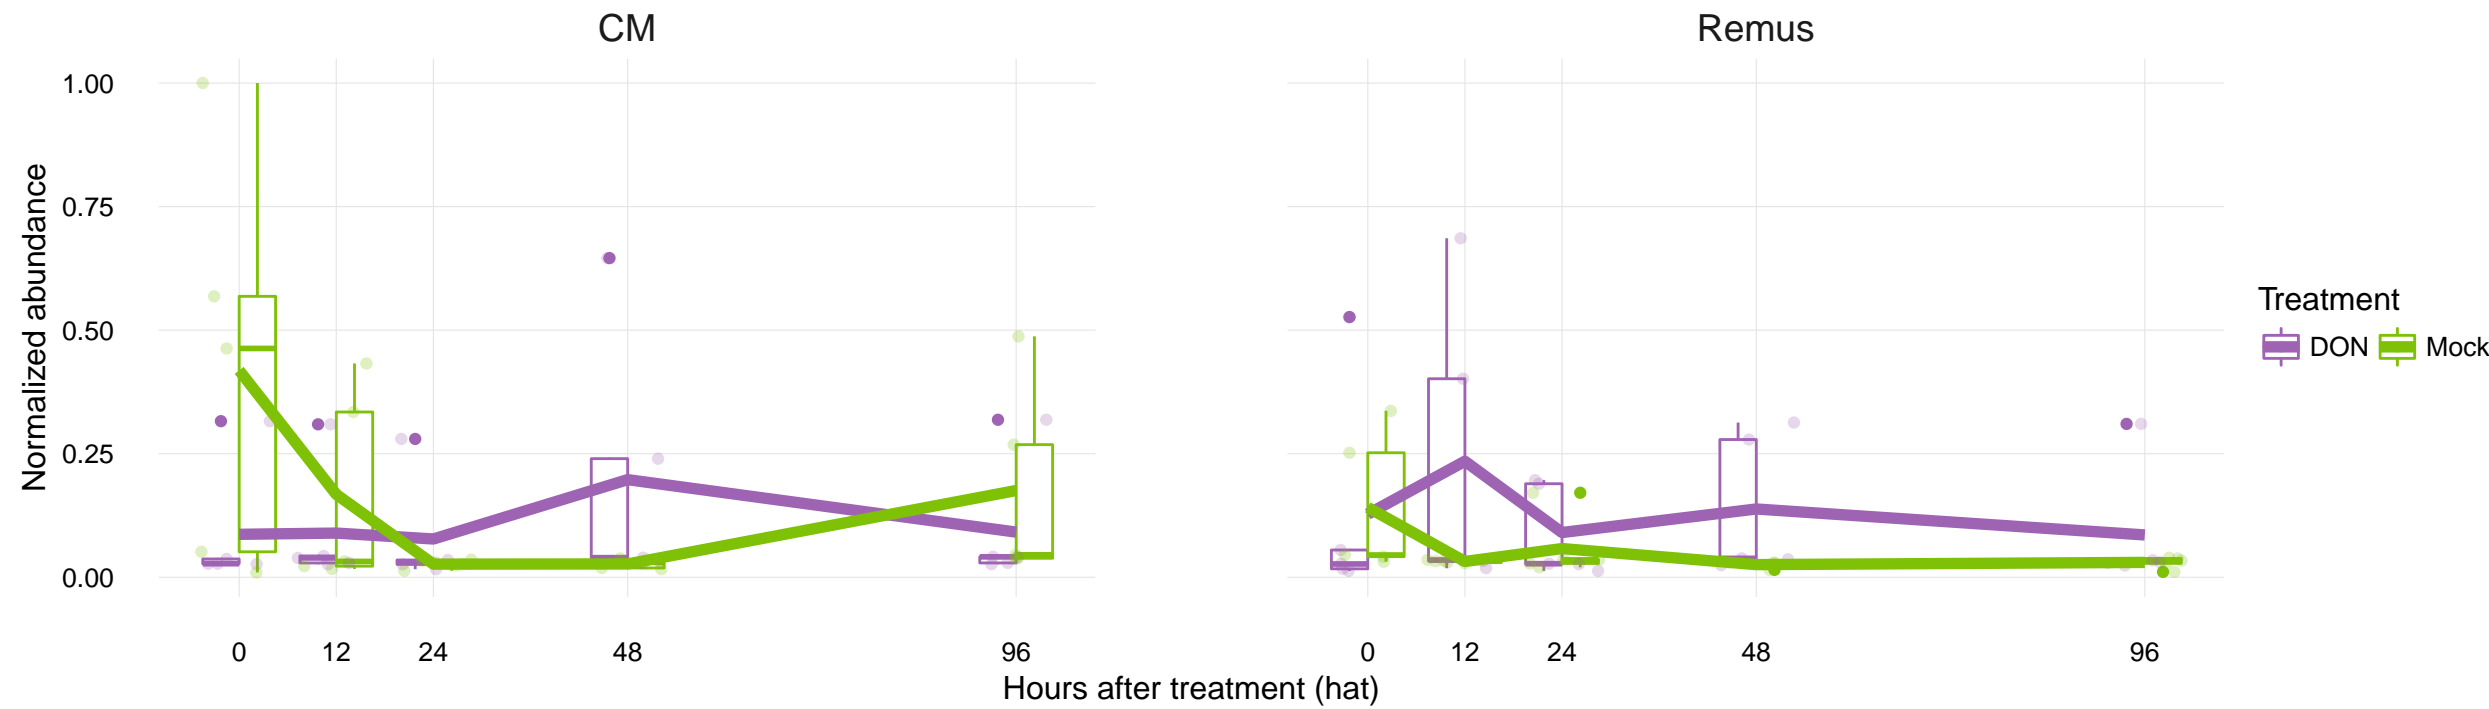

## DON, Mock; all four genotypes

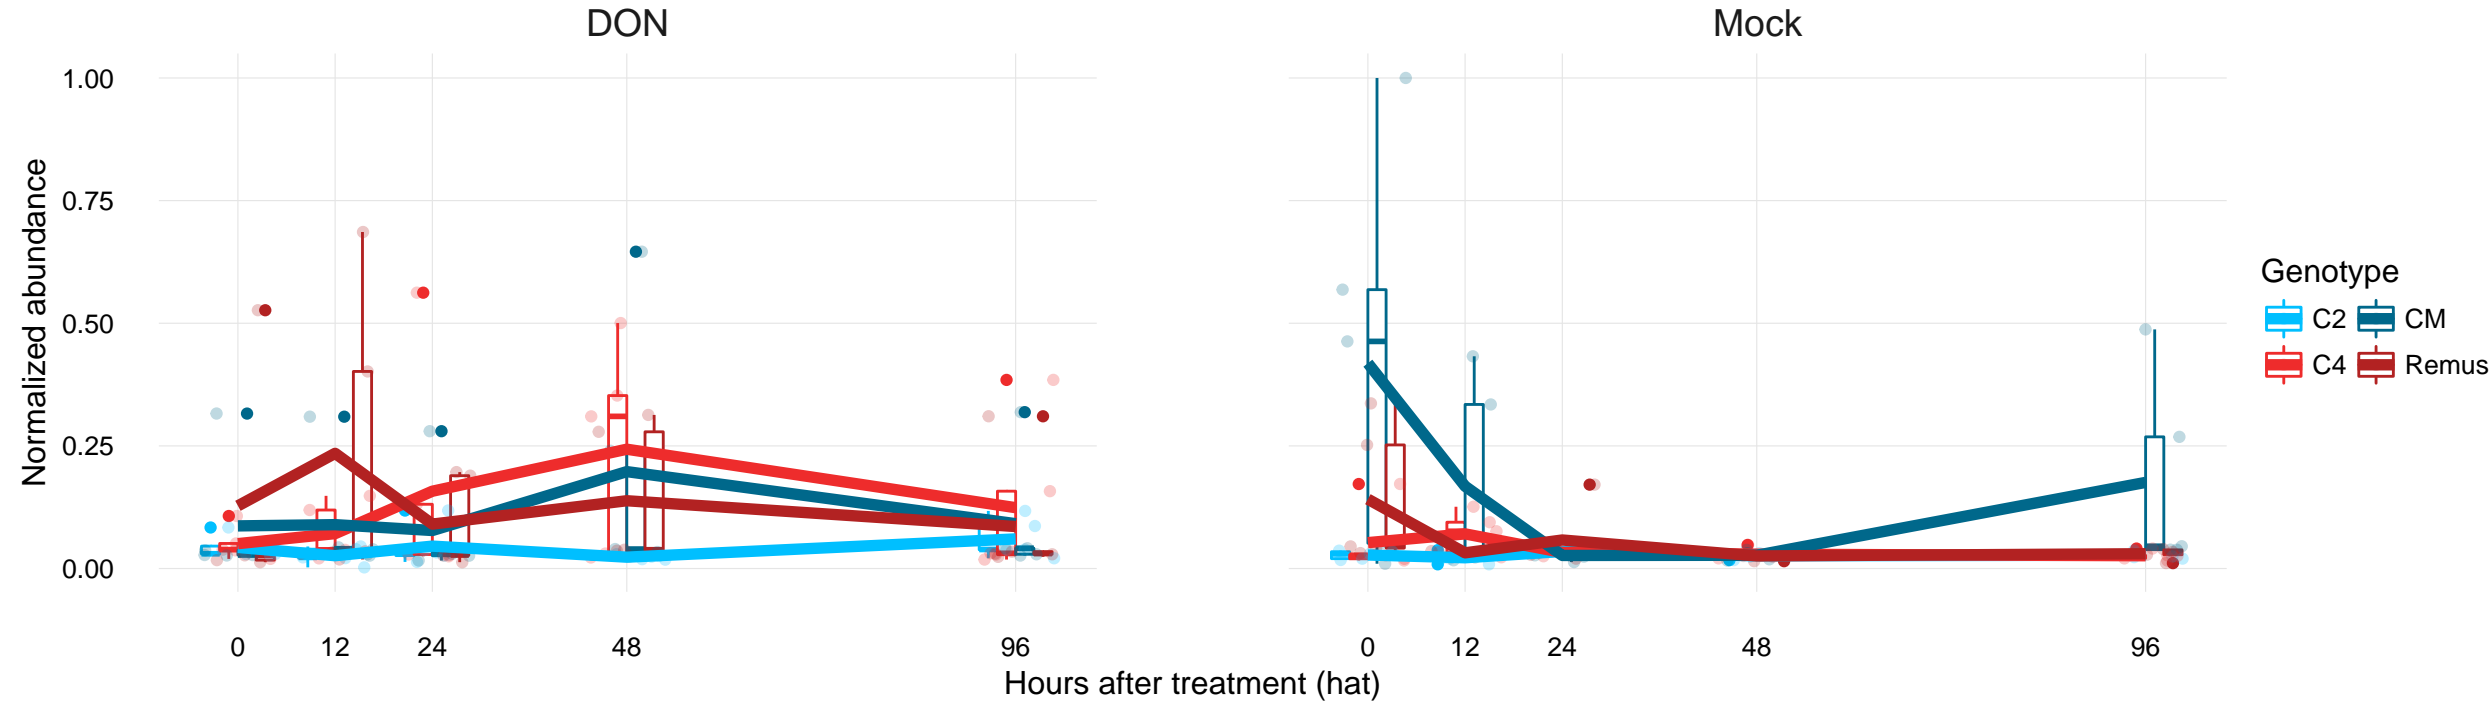



# A.112

Annotated as Lignan  
(1 database hit)

|                |                                                |
|----------------|------------------------------------------------|
| MZ             | 549.2118                                       |
| RT             | 17.96 min                                      |
| Normalization  | Indirectly via surrogate<br>in the KPX samples |
| Cluster        | —                                              |
| Cn total / Phe | 31 / 18                                        |

## C2, C4; different treatments

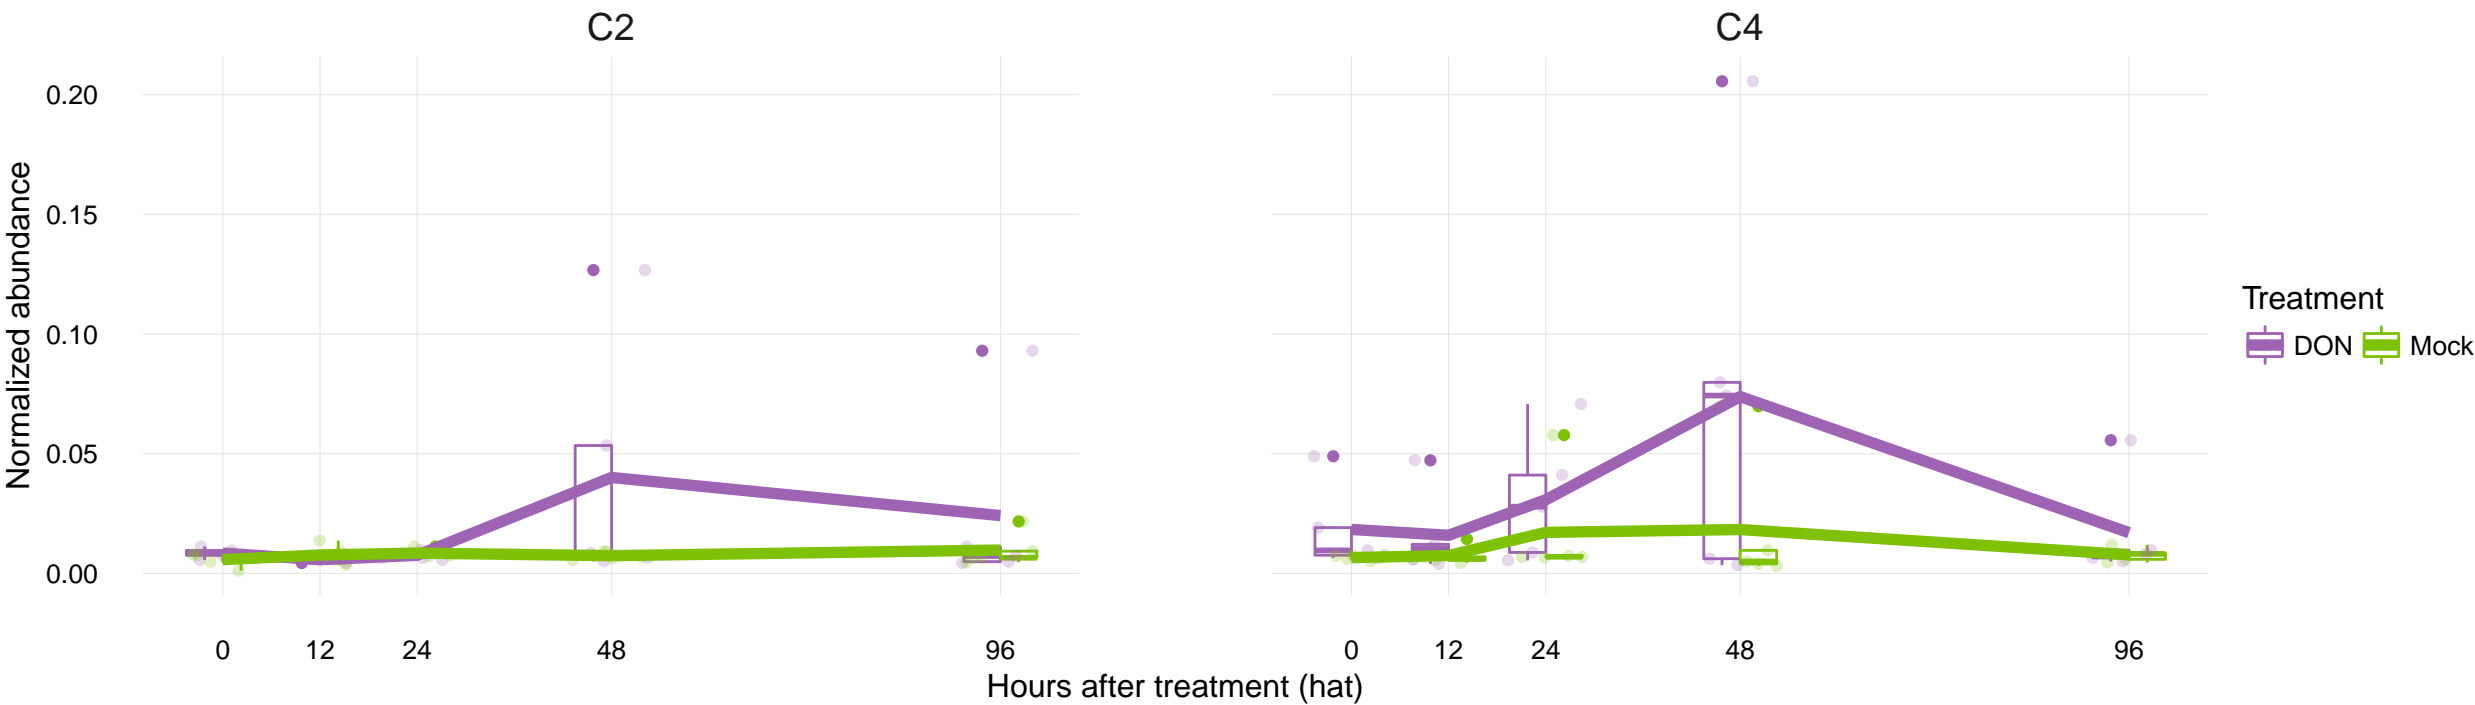

## DON, Mock; different genotypes

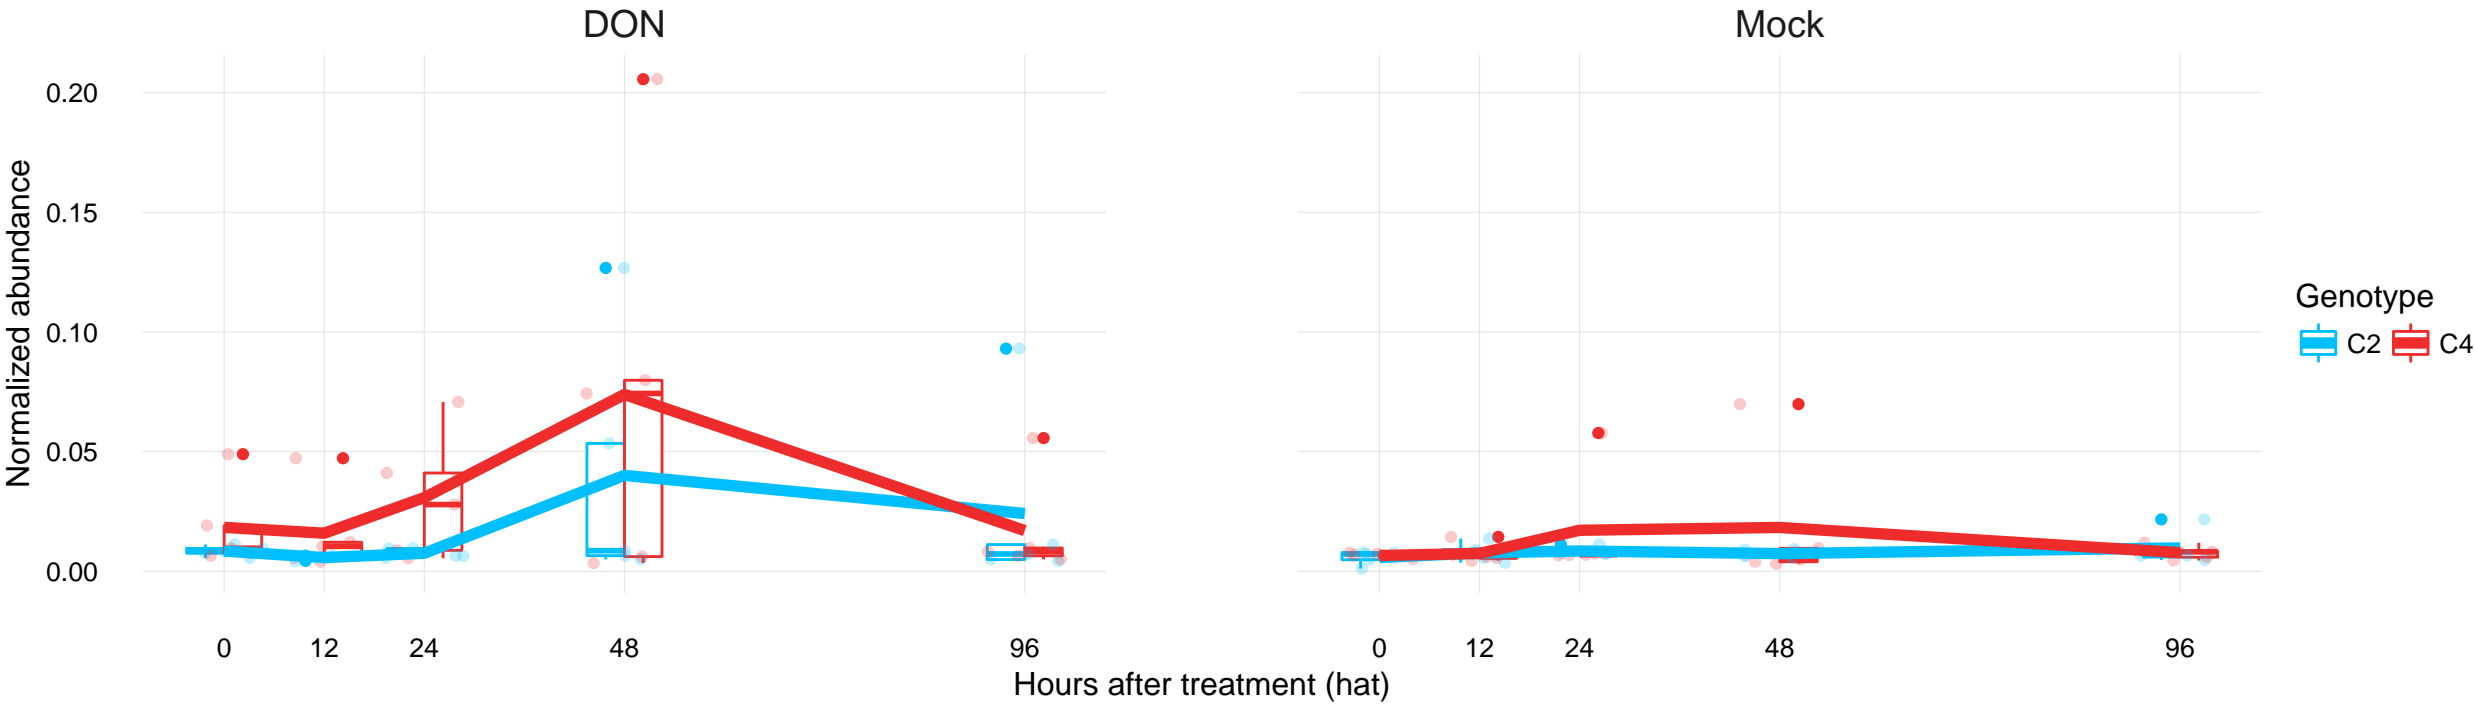

## CM, Remus; different treatments

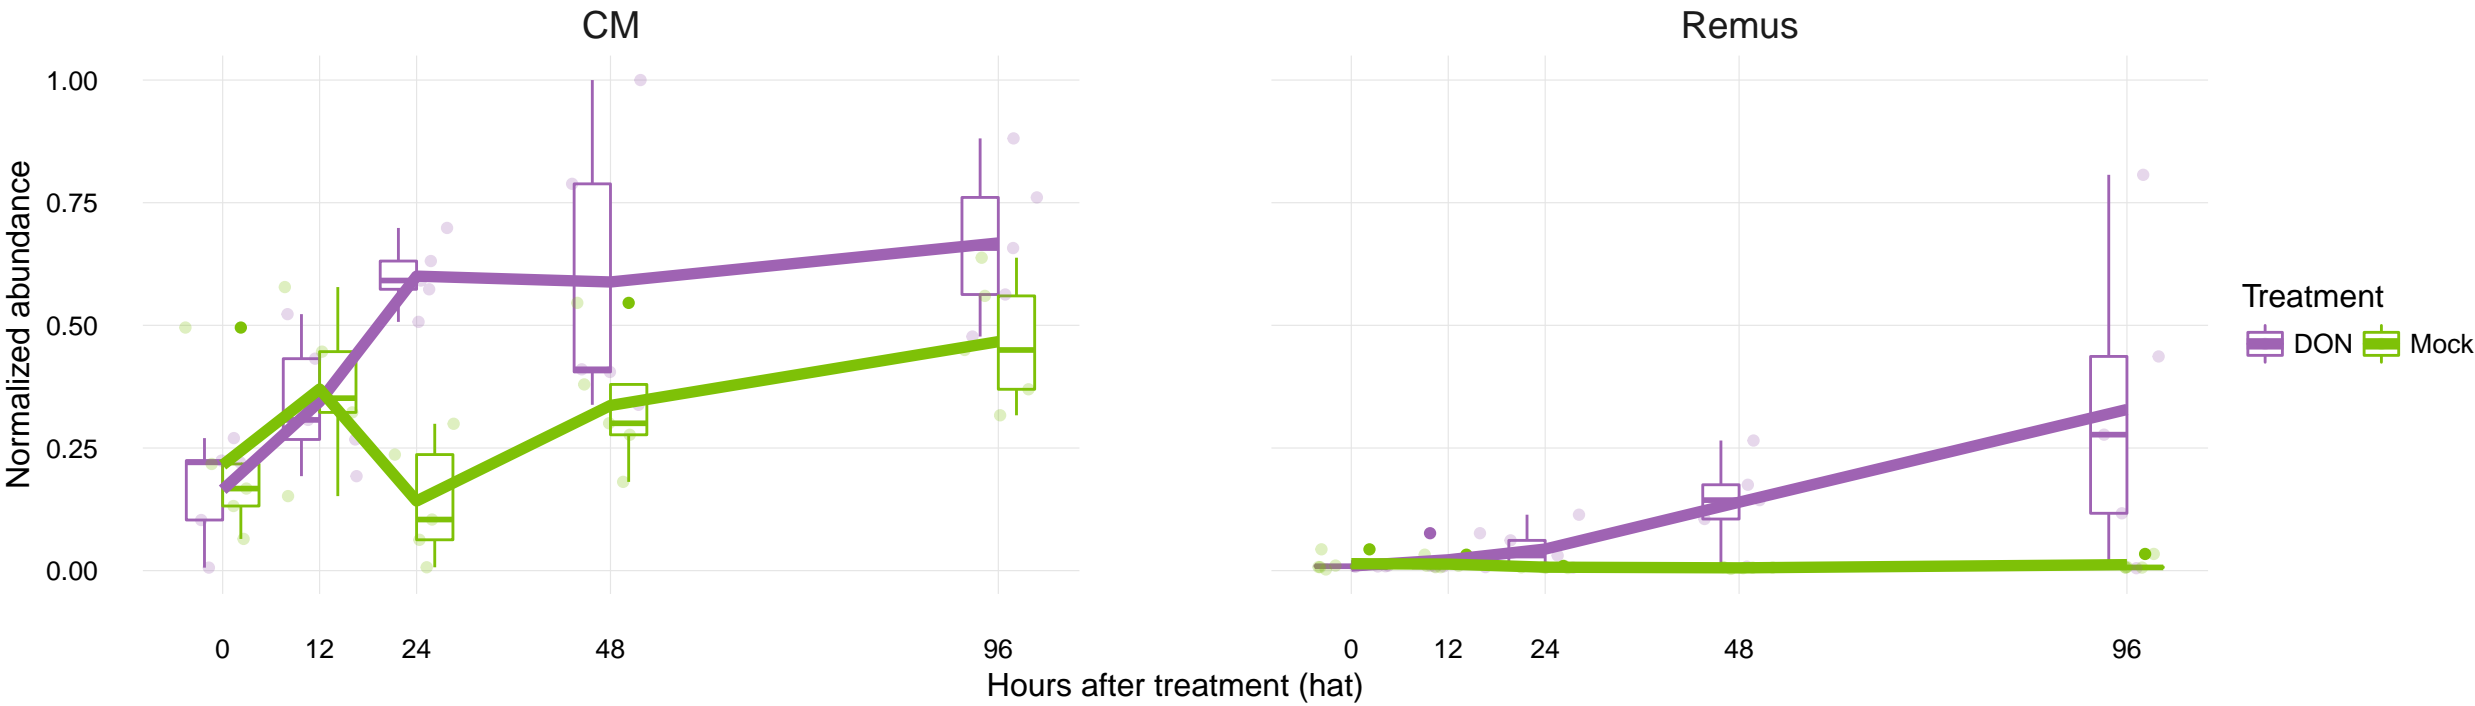

## DON, Mock; all four genotypes

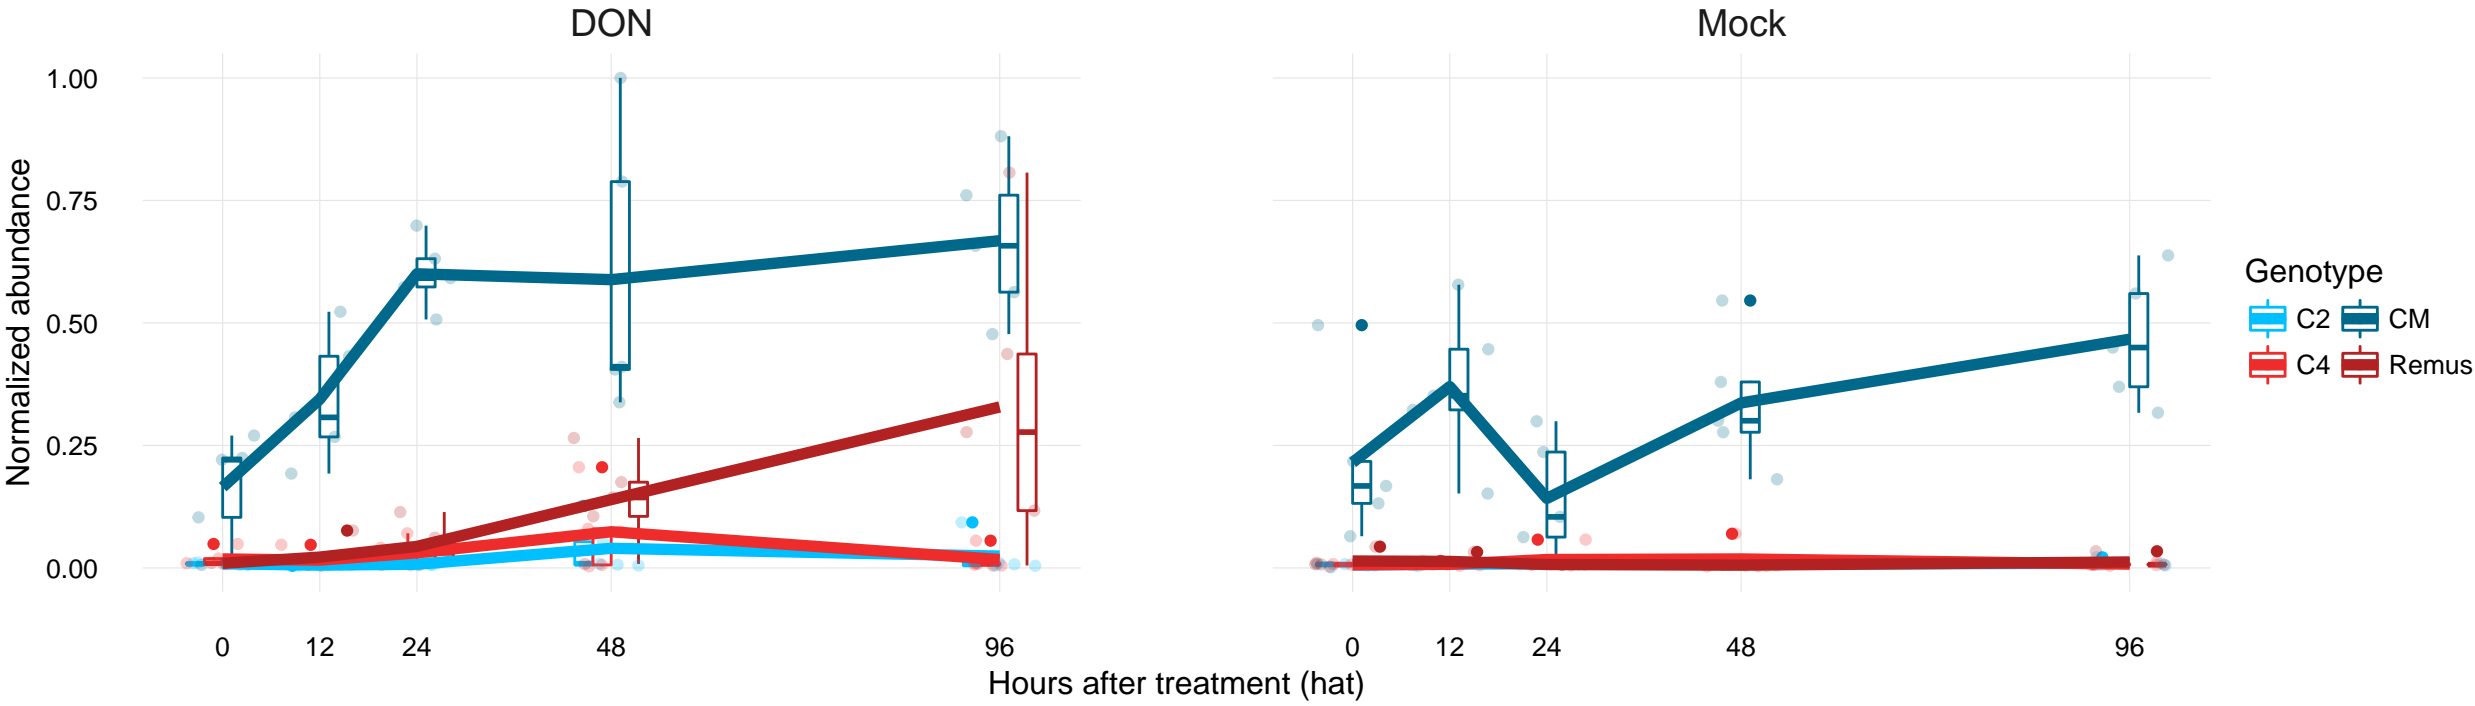

# A.54

Annotated as HCA derivative  
(1 database hit)

|                |                                                |
|----------------|------------------------------------------------|
| MZ             | 369.1181                                       |
| RT             | 12.26 min                                      |
| Normalization  | Indirectly via surrogate<br>in the KPX samples |
| Cluster        | Cluster 3                                      |
| Cn total / Phe | 17 / 9                                         |

## C2, C4; different treatments

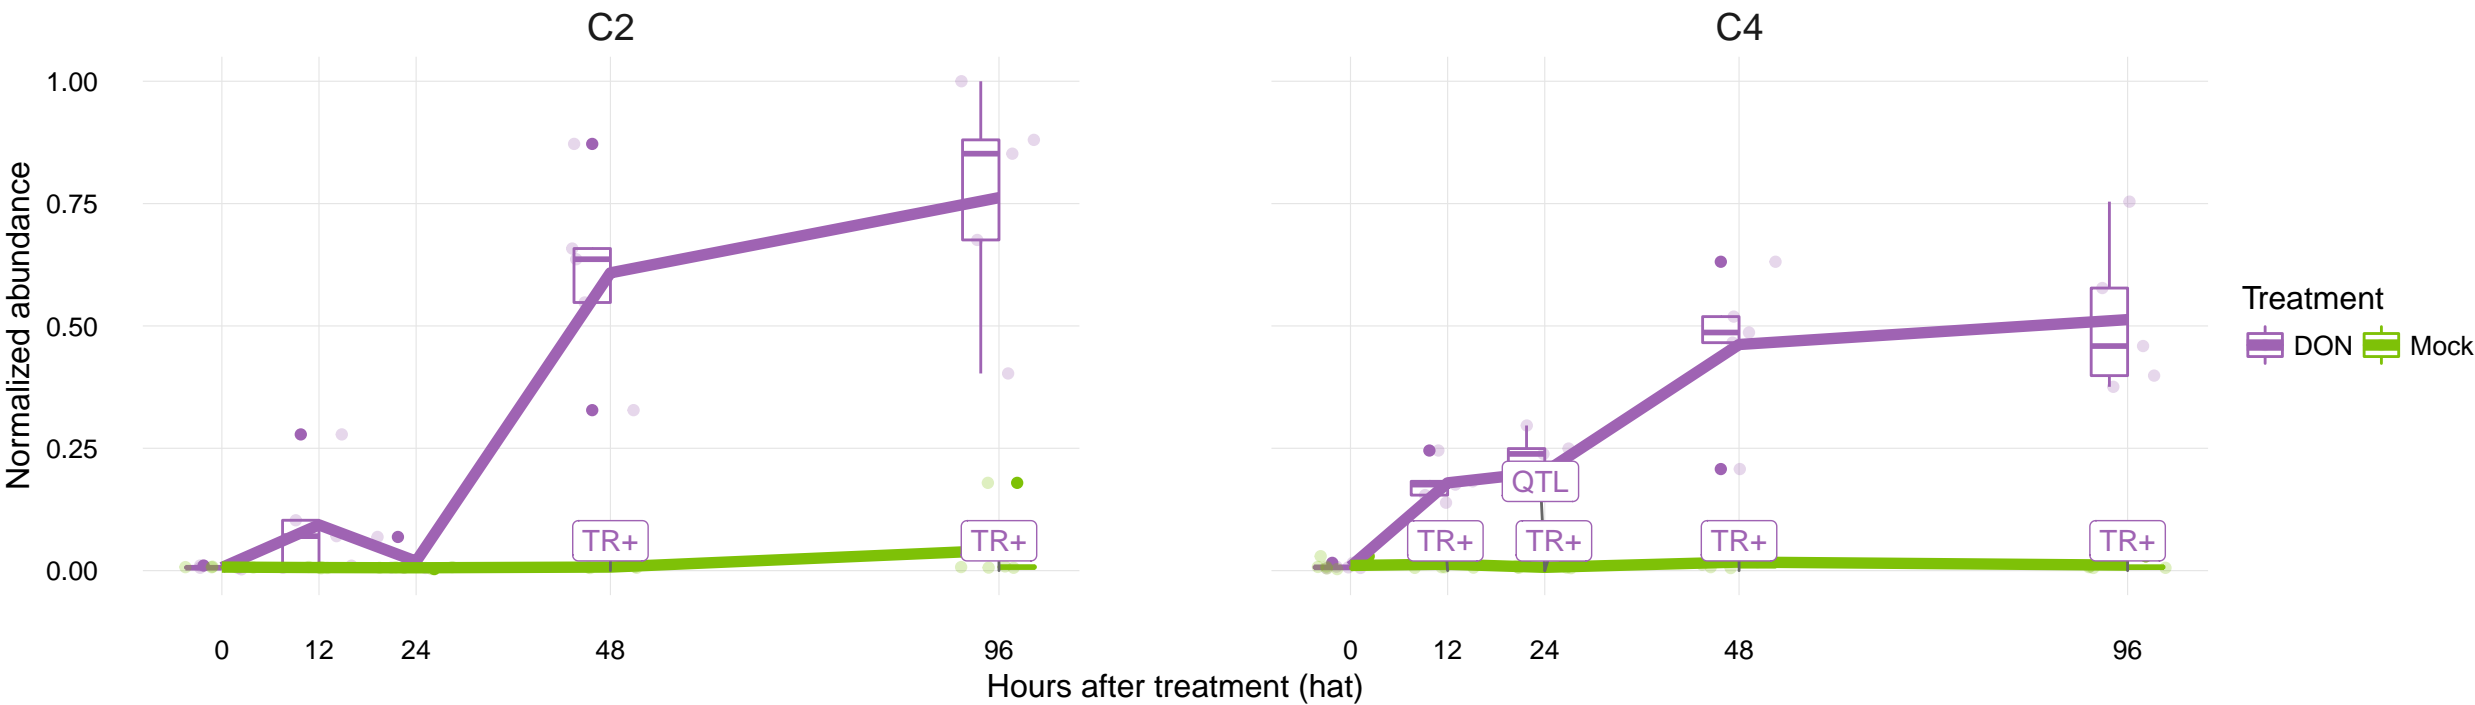

## DON, Mock; different genotypes

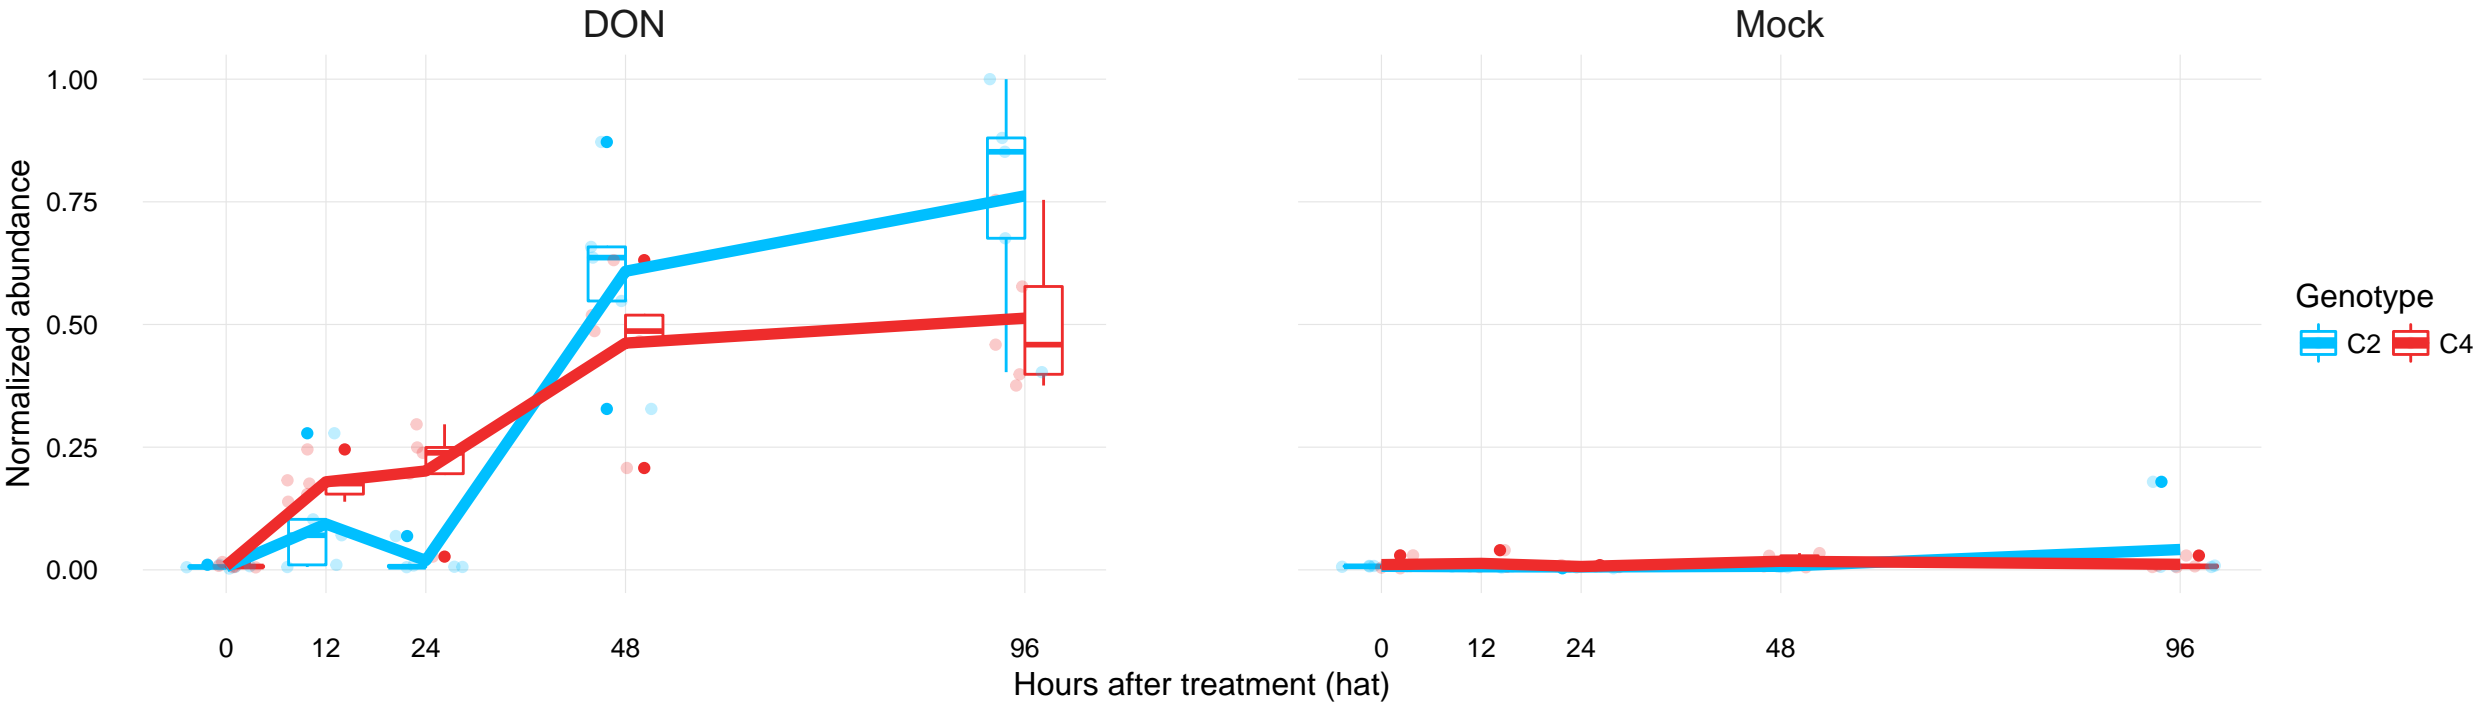

## CM, Remus; different treatments

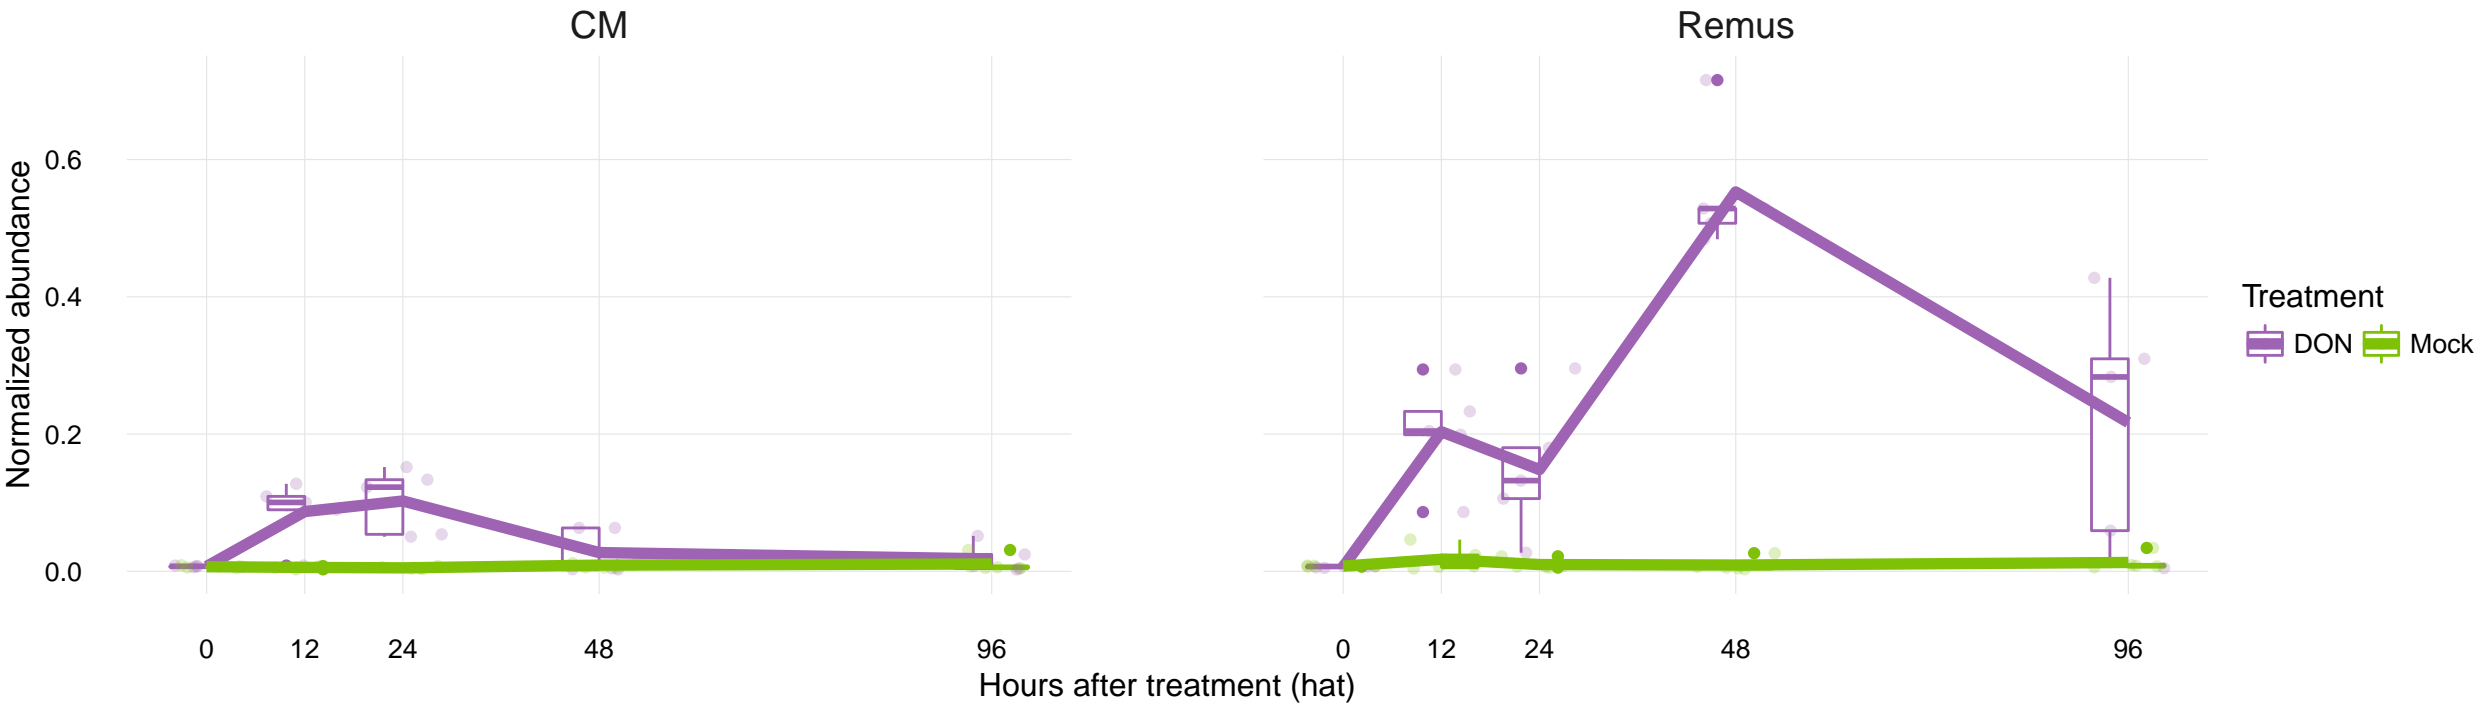

## DON, Mock; all four genotypes

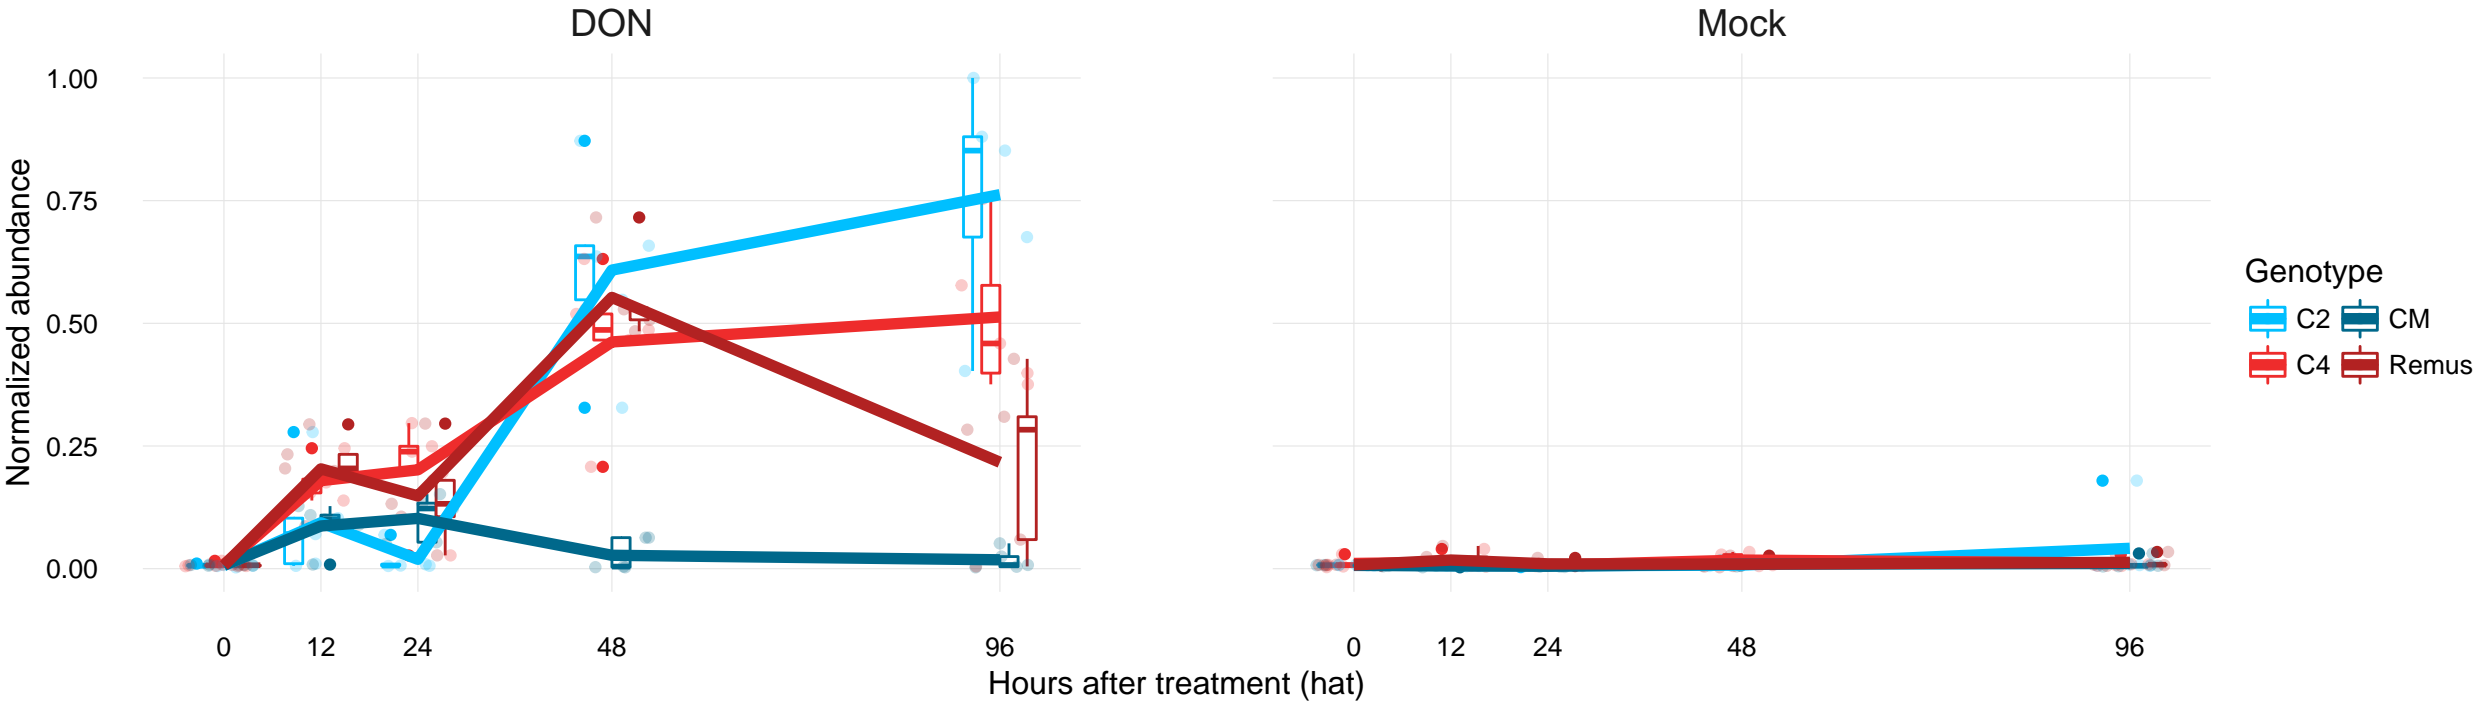

# A.32

Annotated as HCA derivative  
(1 database hit)

|                |                          |
|----------------|--------------------------|
| MZ             | 391.1005                 |
| RT             | 9.63 min                 |
| Normalization  | Directly via KPX samples |
| Cluster        | Cluster 3                |
| Cn total / Phe | 9 / 9                    |

## C2, C4; different treatments

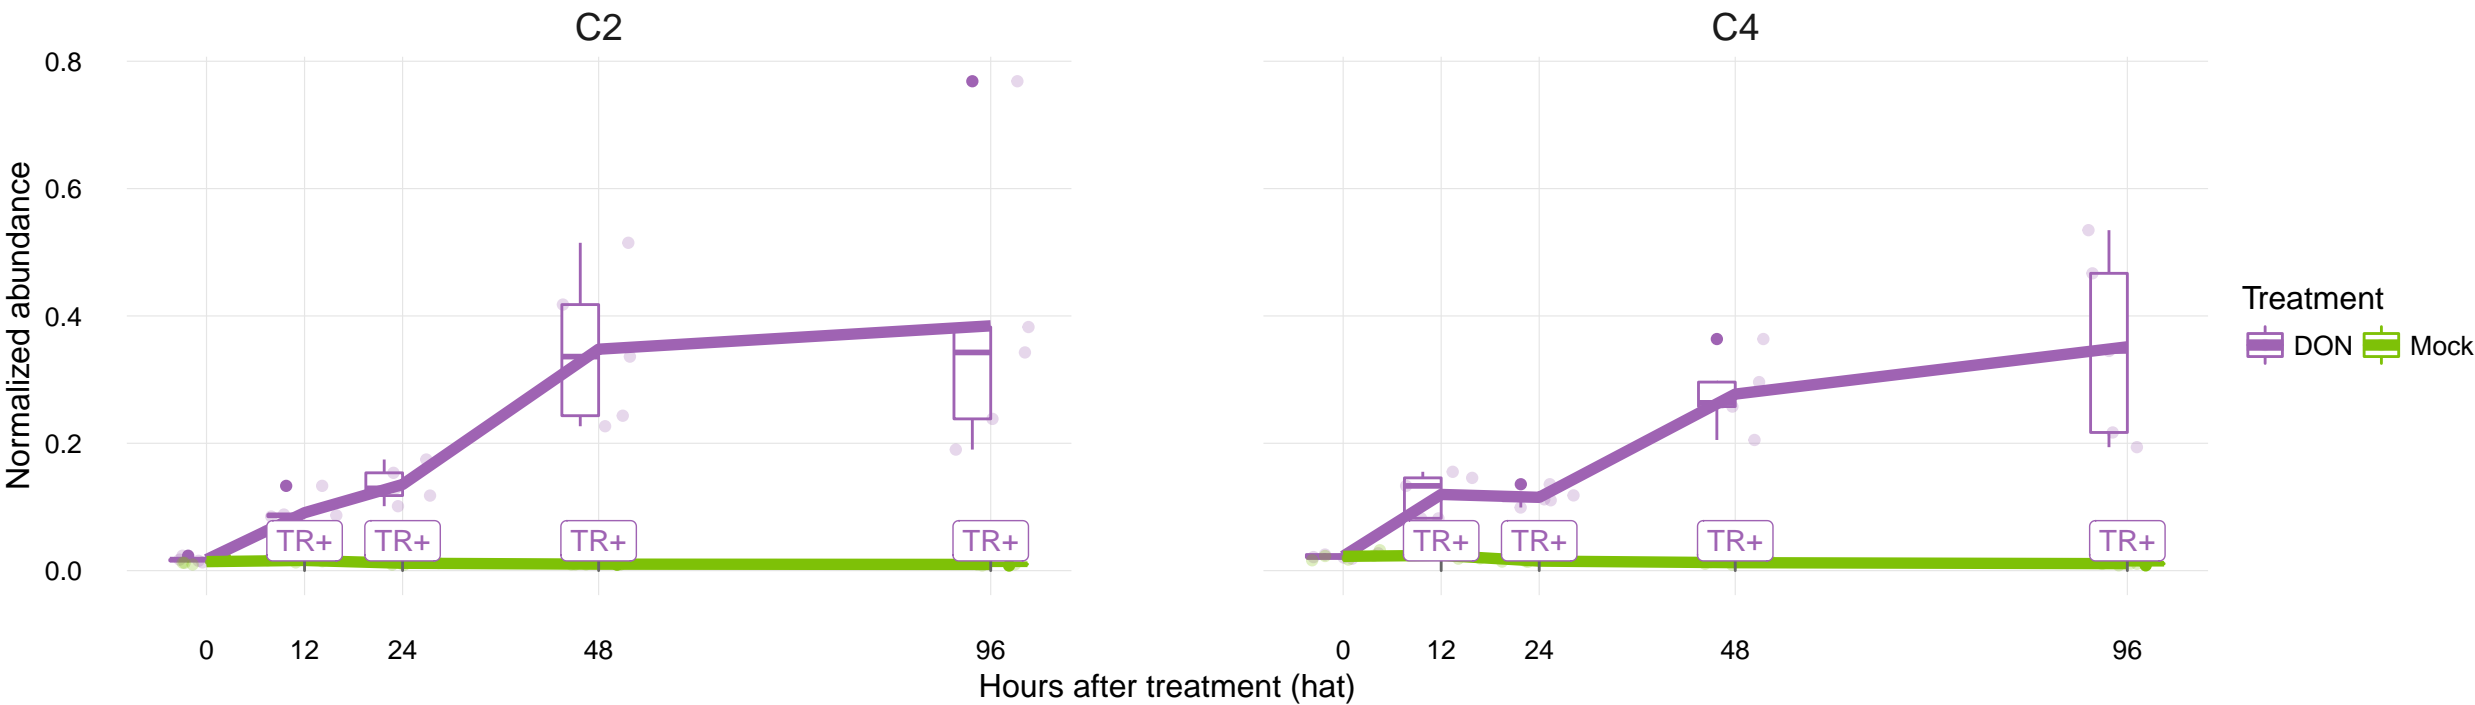

## DON, Mock; different genotypes

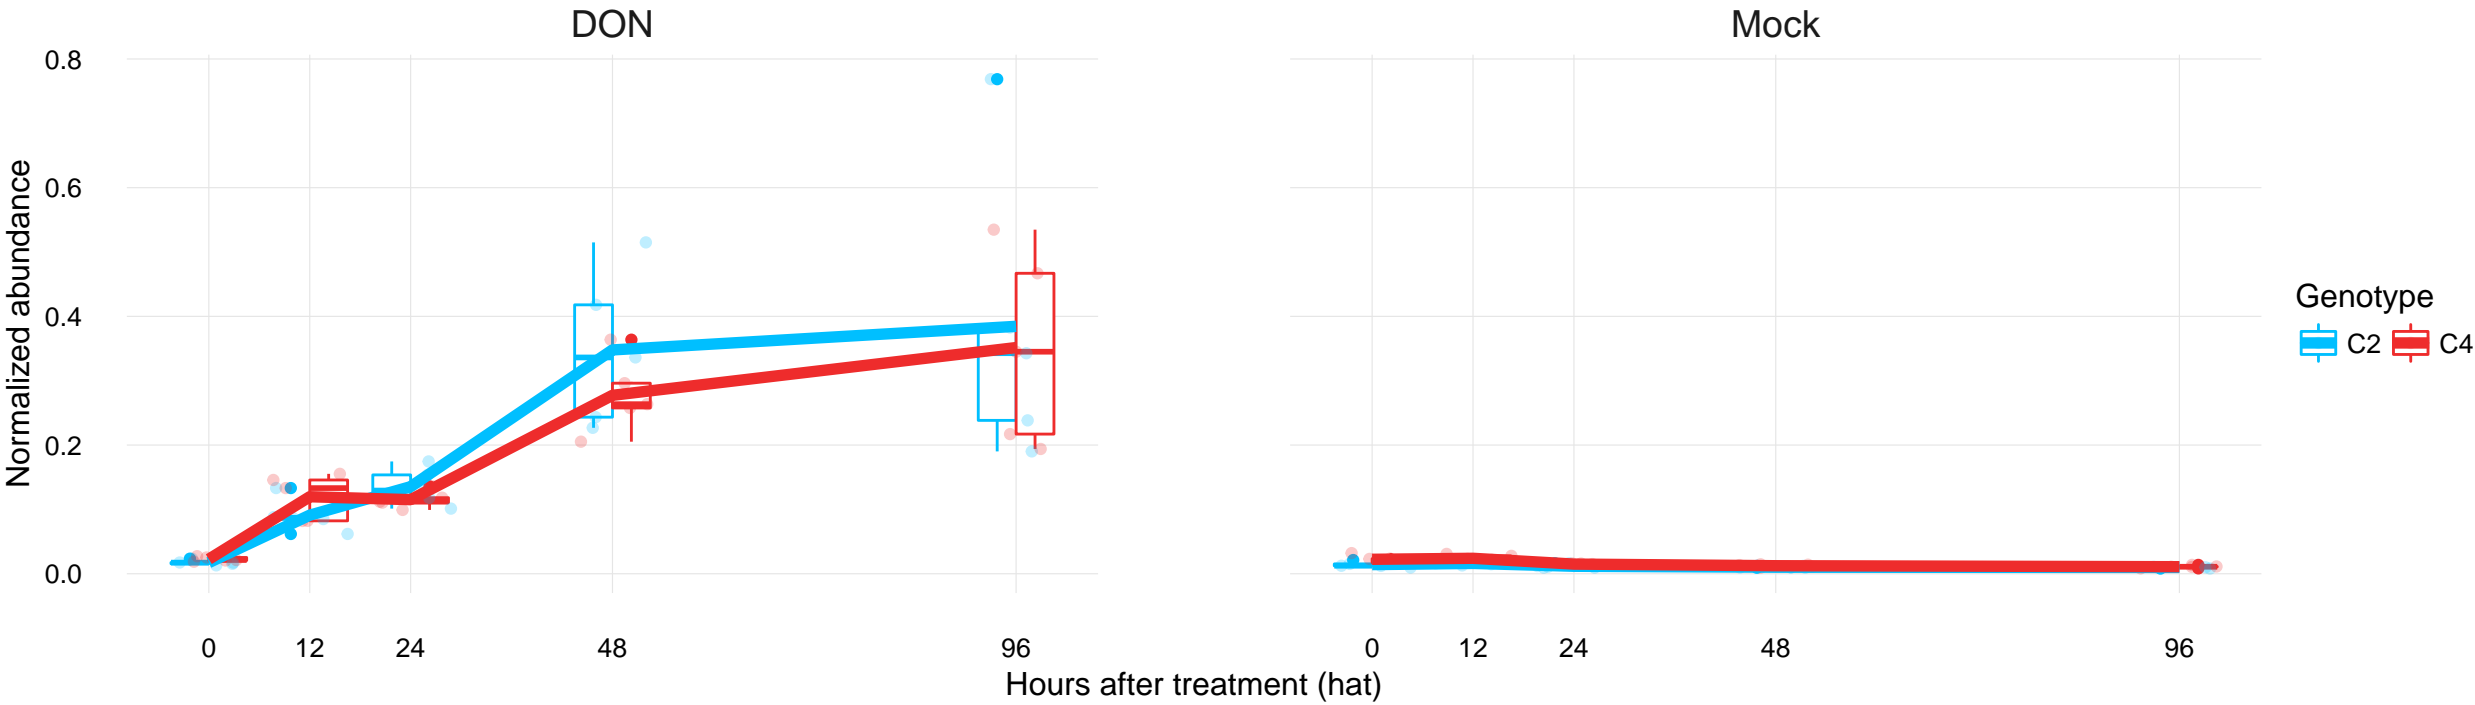

## CM, Remus; different treatments

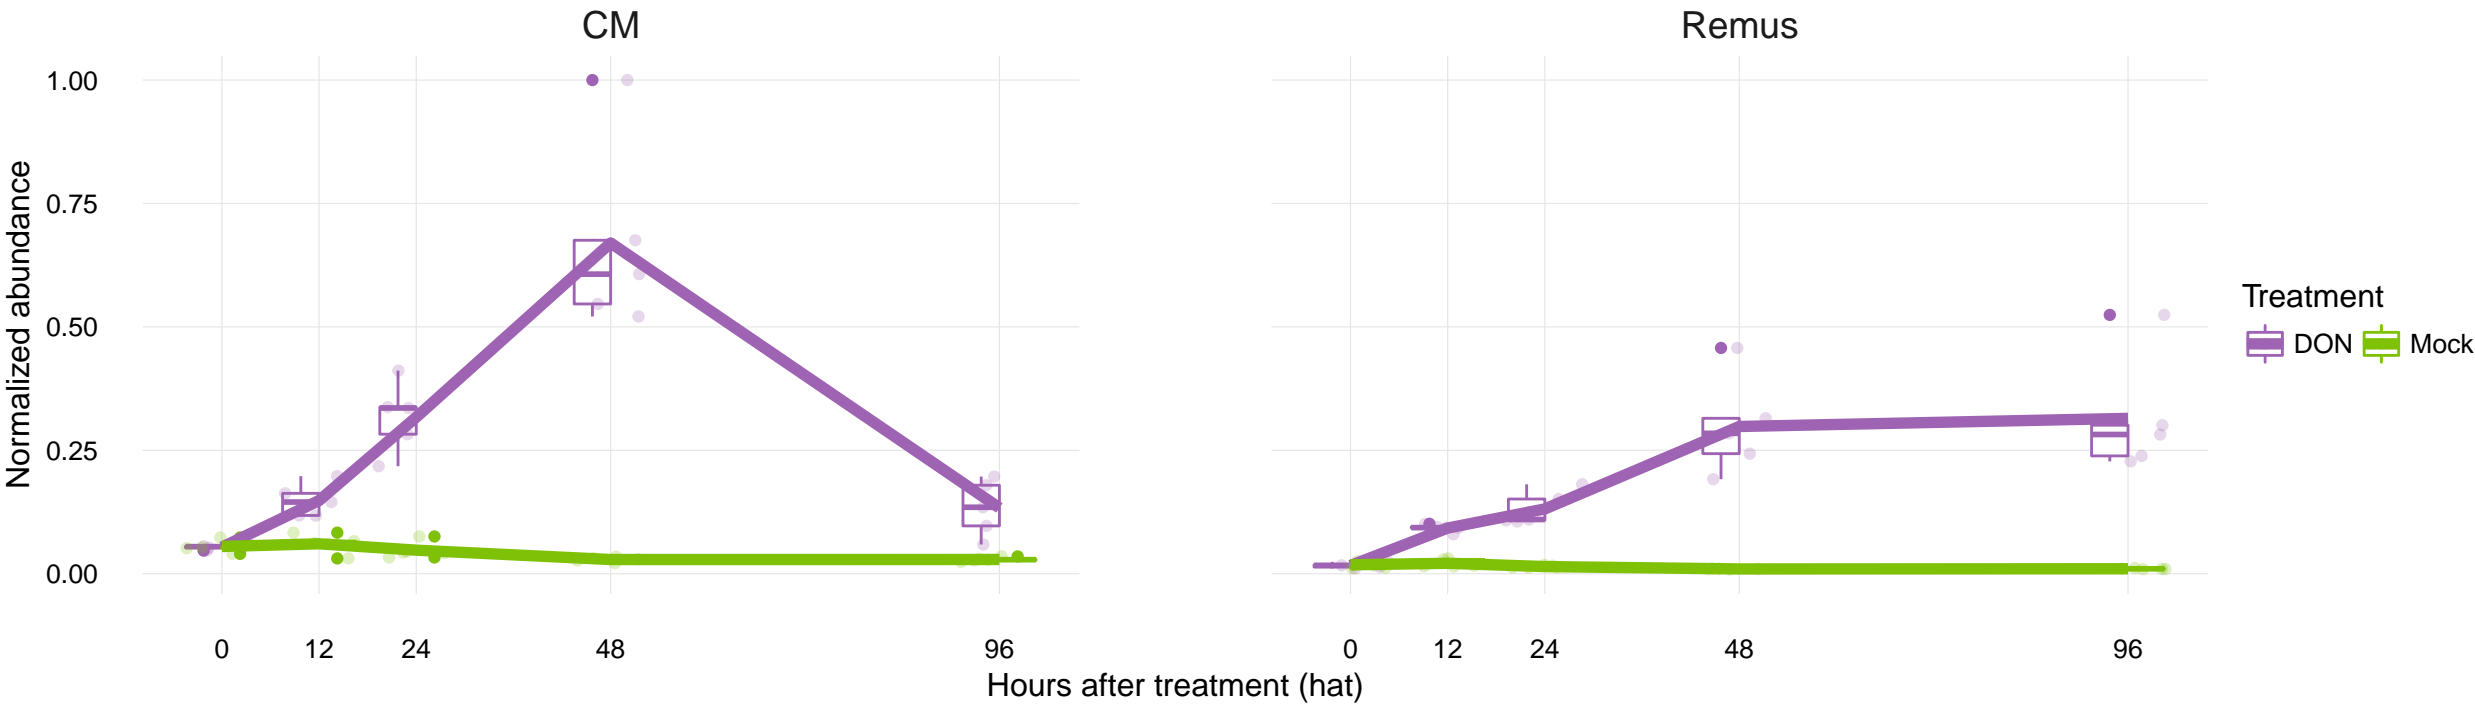

## DON, Mock; all four genotypes

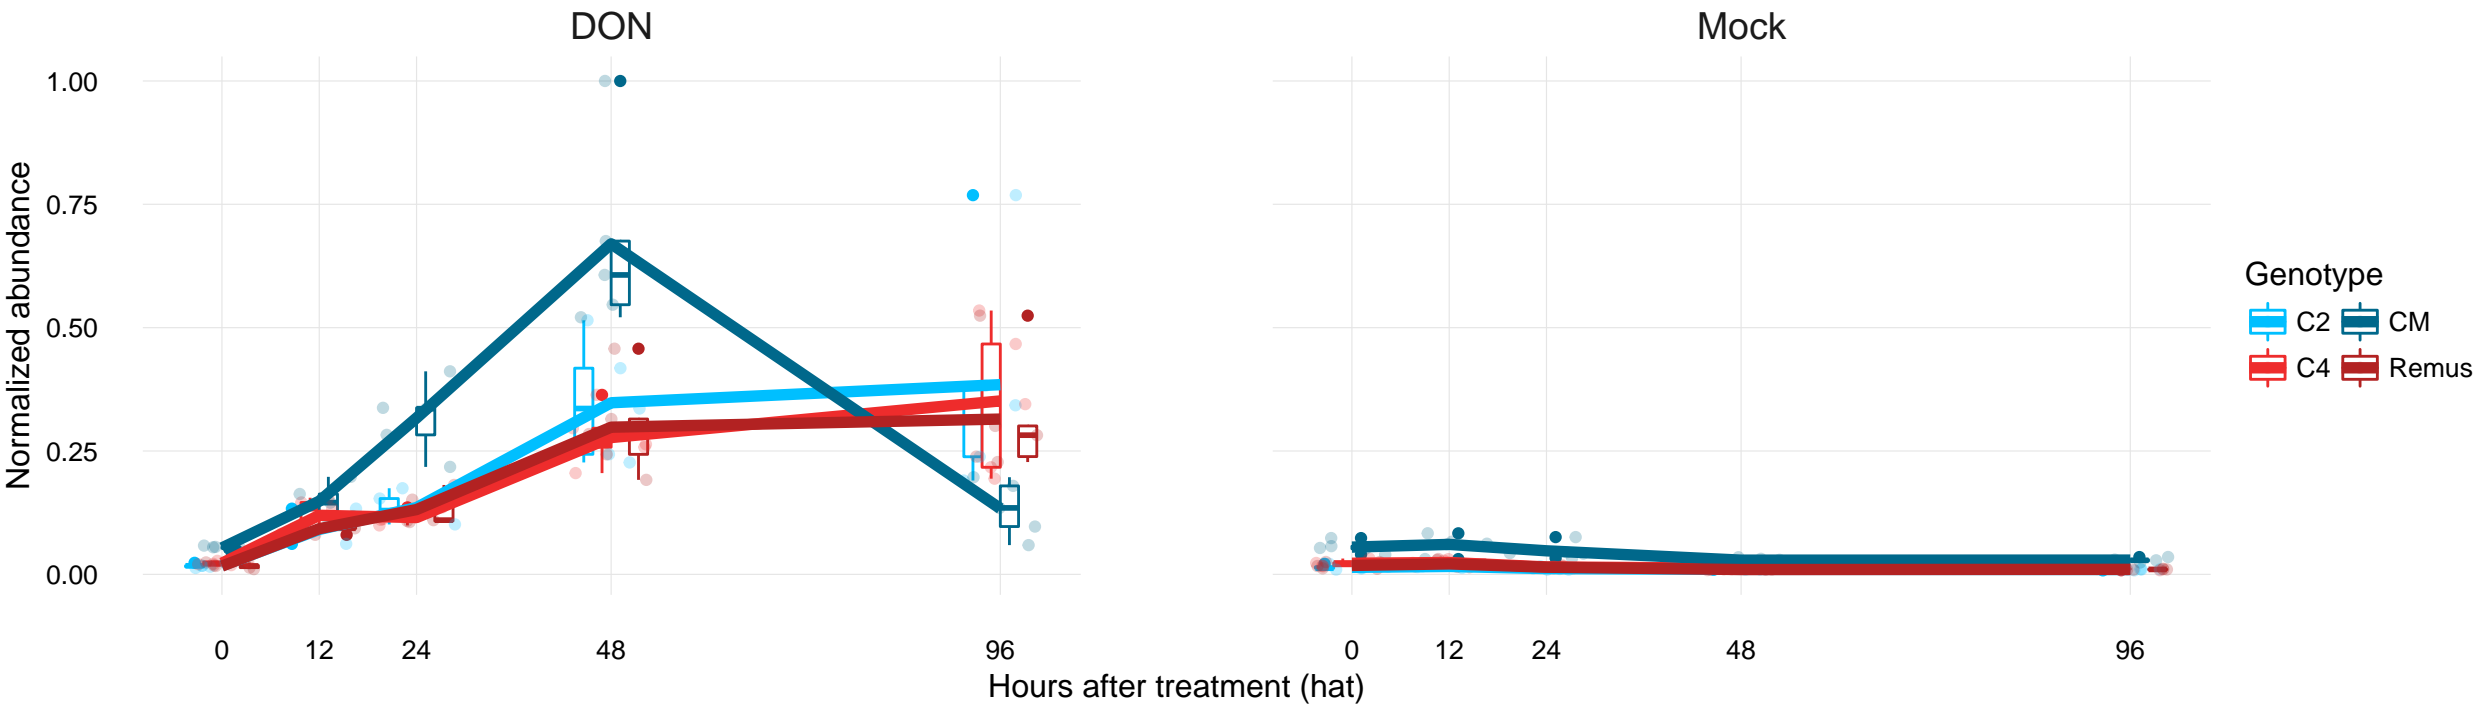

# A.35

Annotated as others (dipeptide)  
(1 database hit)

|                |                          |
|----------------|--------------------------|
| MZ             | 295.1289                 |
| RT             | 10.22 min                |
| Normalization  | Directly via KPX samples |
| Cluster        | Cluster 3                |
| Cn total / Phe | 14 / 9                   |

## C2, C4; different treatments

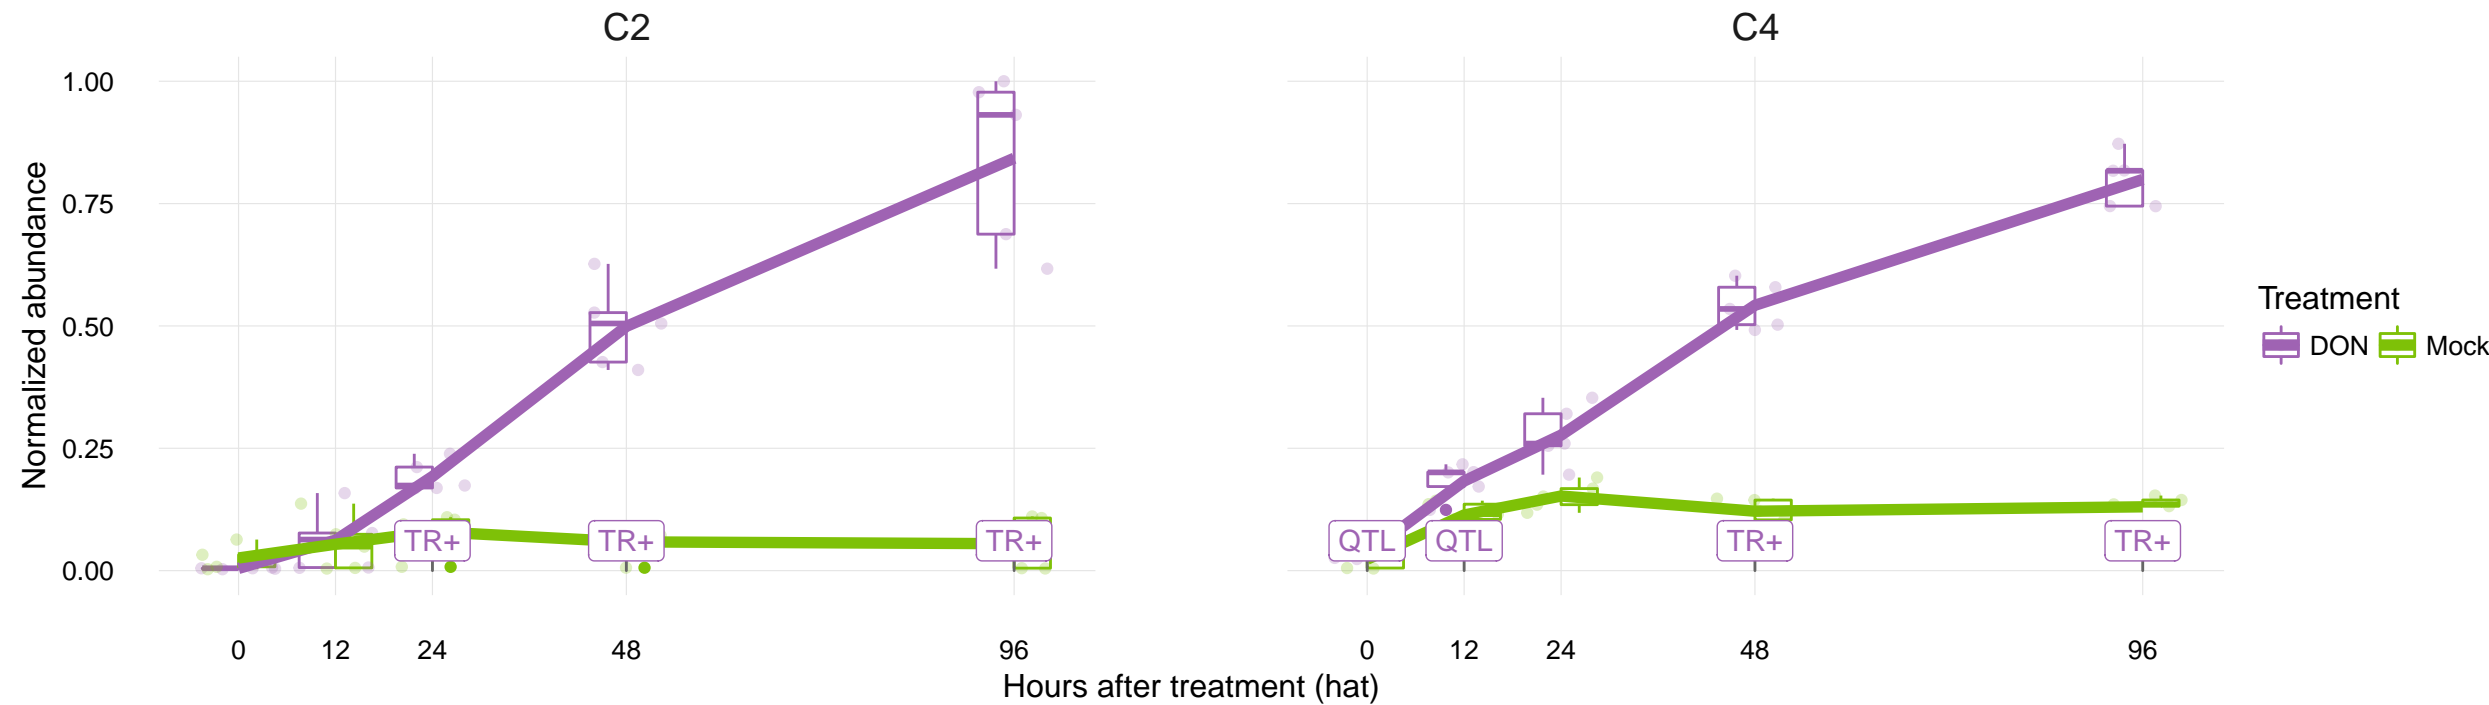

## DON, Mock; different genotypes

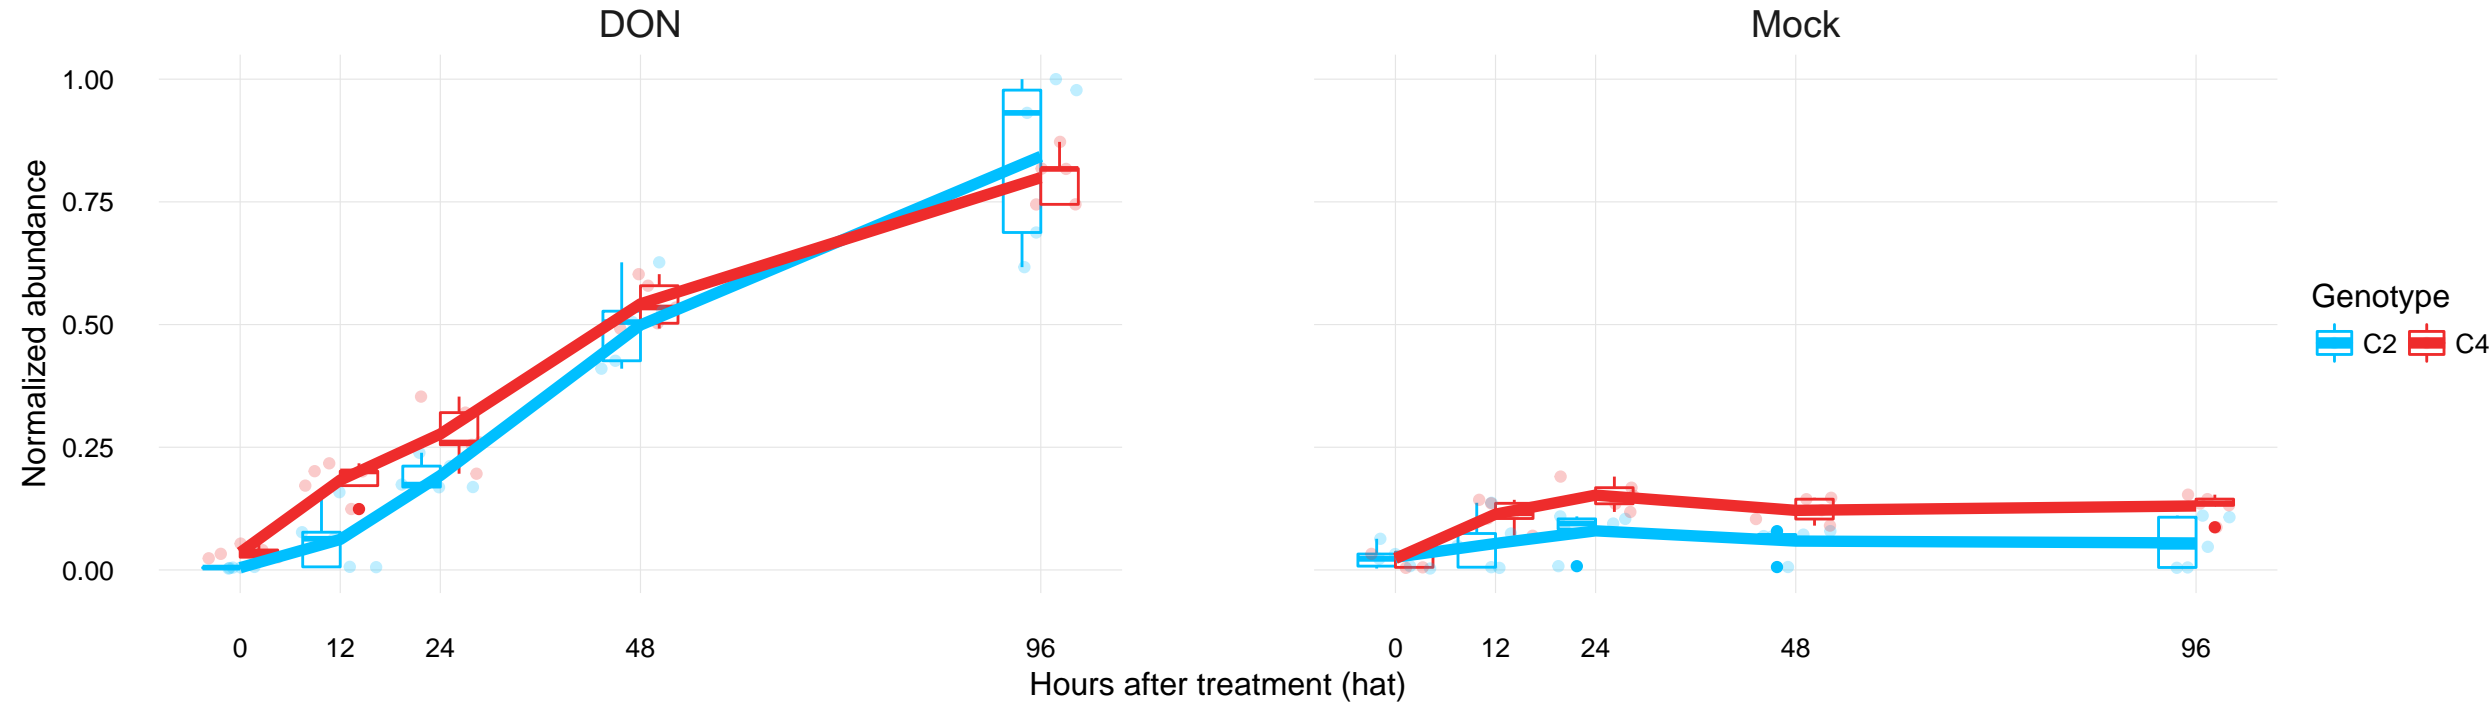

## CM, Remus; different treatments

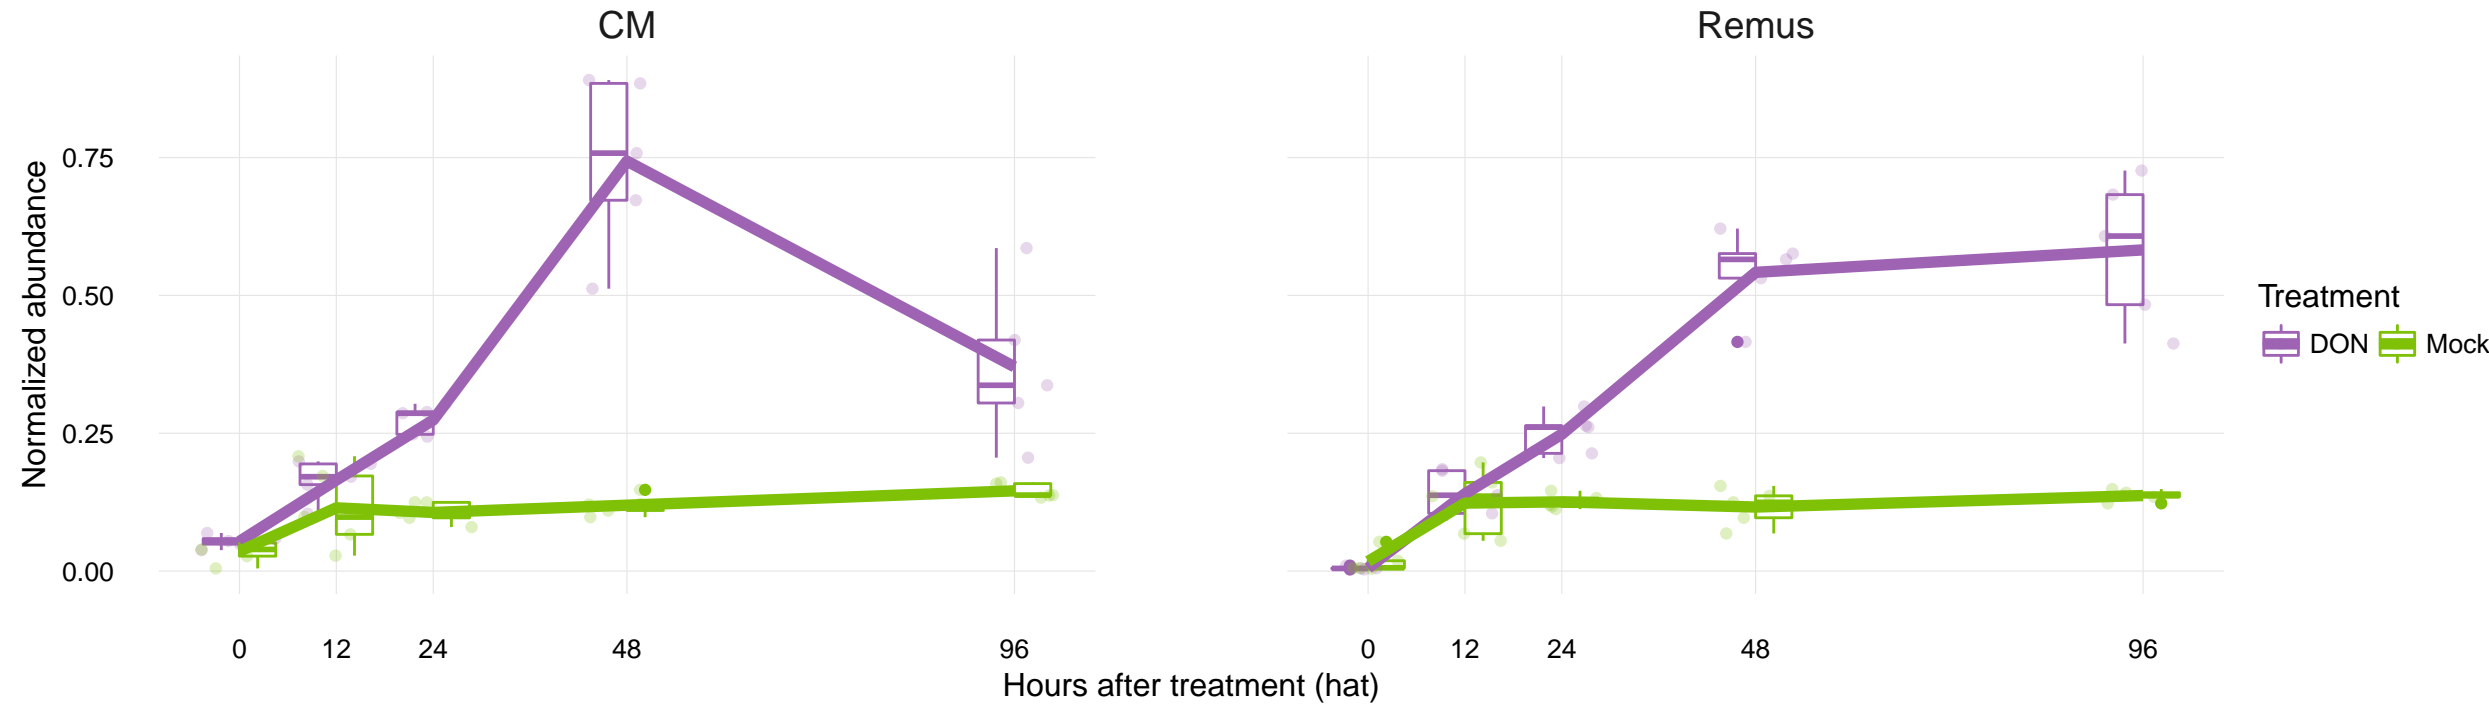

## DON, Mock; all four genotypes

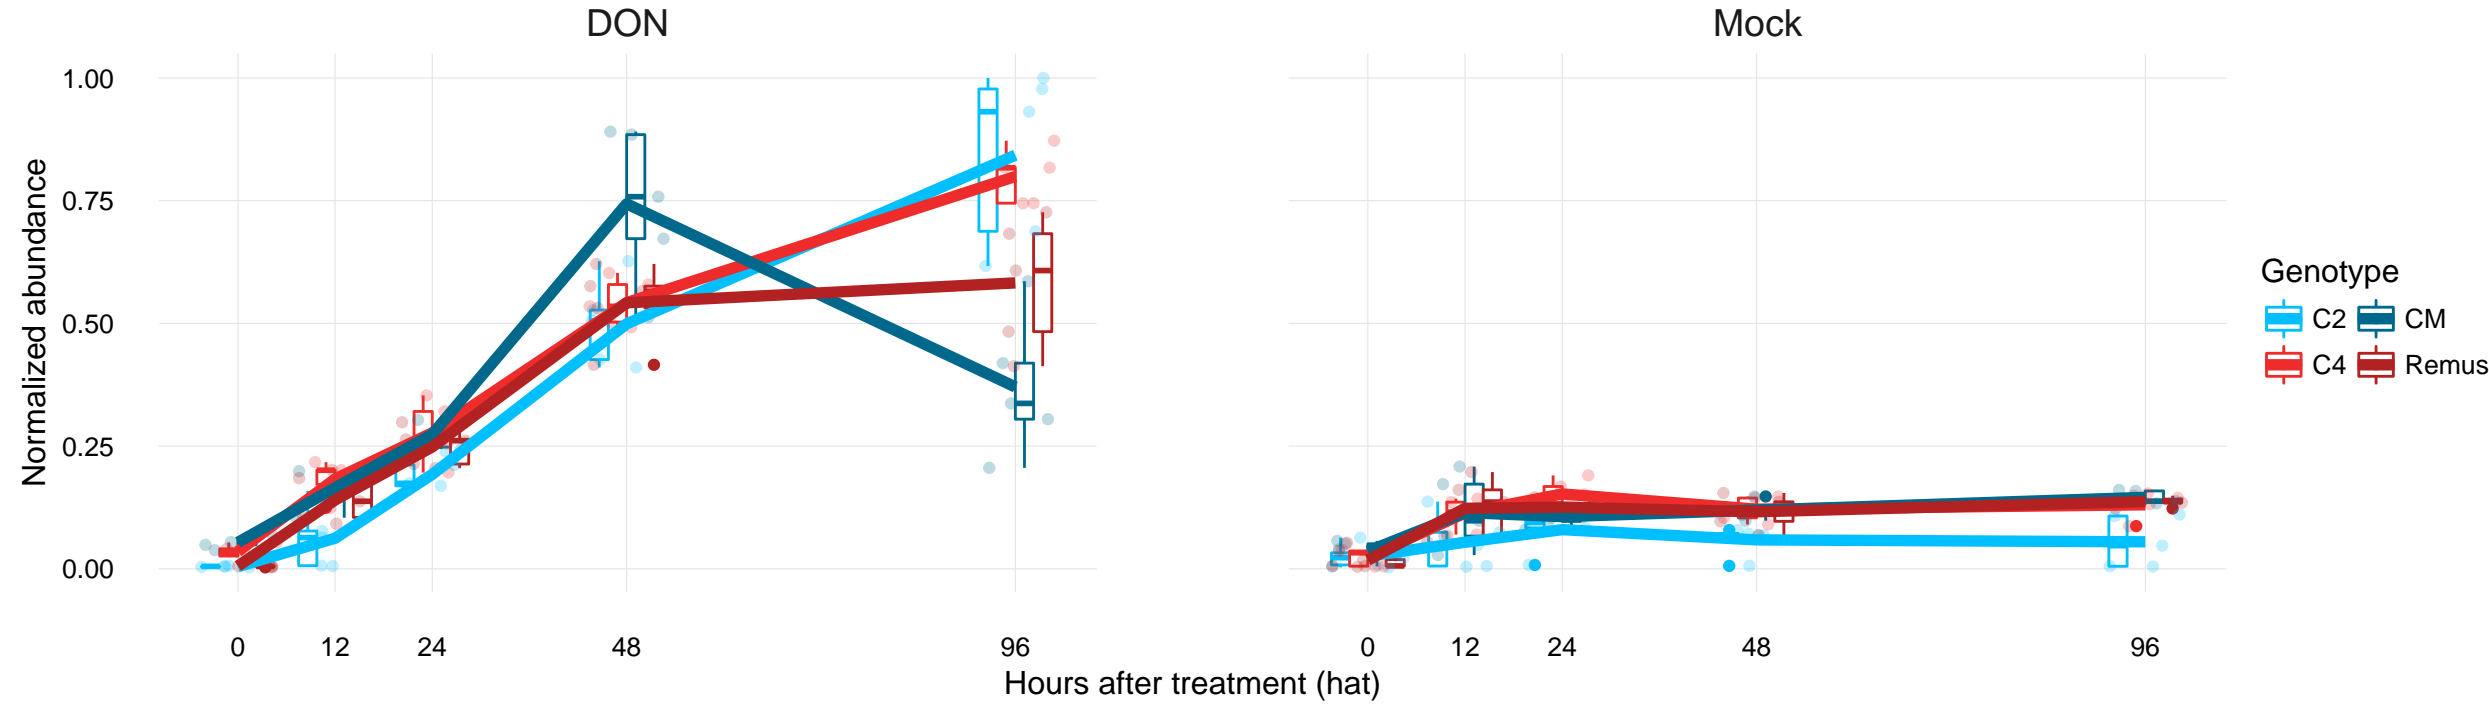

# A.40

Annotated as HCA derivative  
(1 database hit)

|                |                          |
|----------------|--------------------------|
| MZ             | 379.1009                 |
| RT             | 10.36 min                |
| Normalization  | Directly via KPX samples |
| Cluster        | Cluster 3                |
| Cn total / Phe | 9 / 9                    |

## C2, C4; different treatments

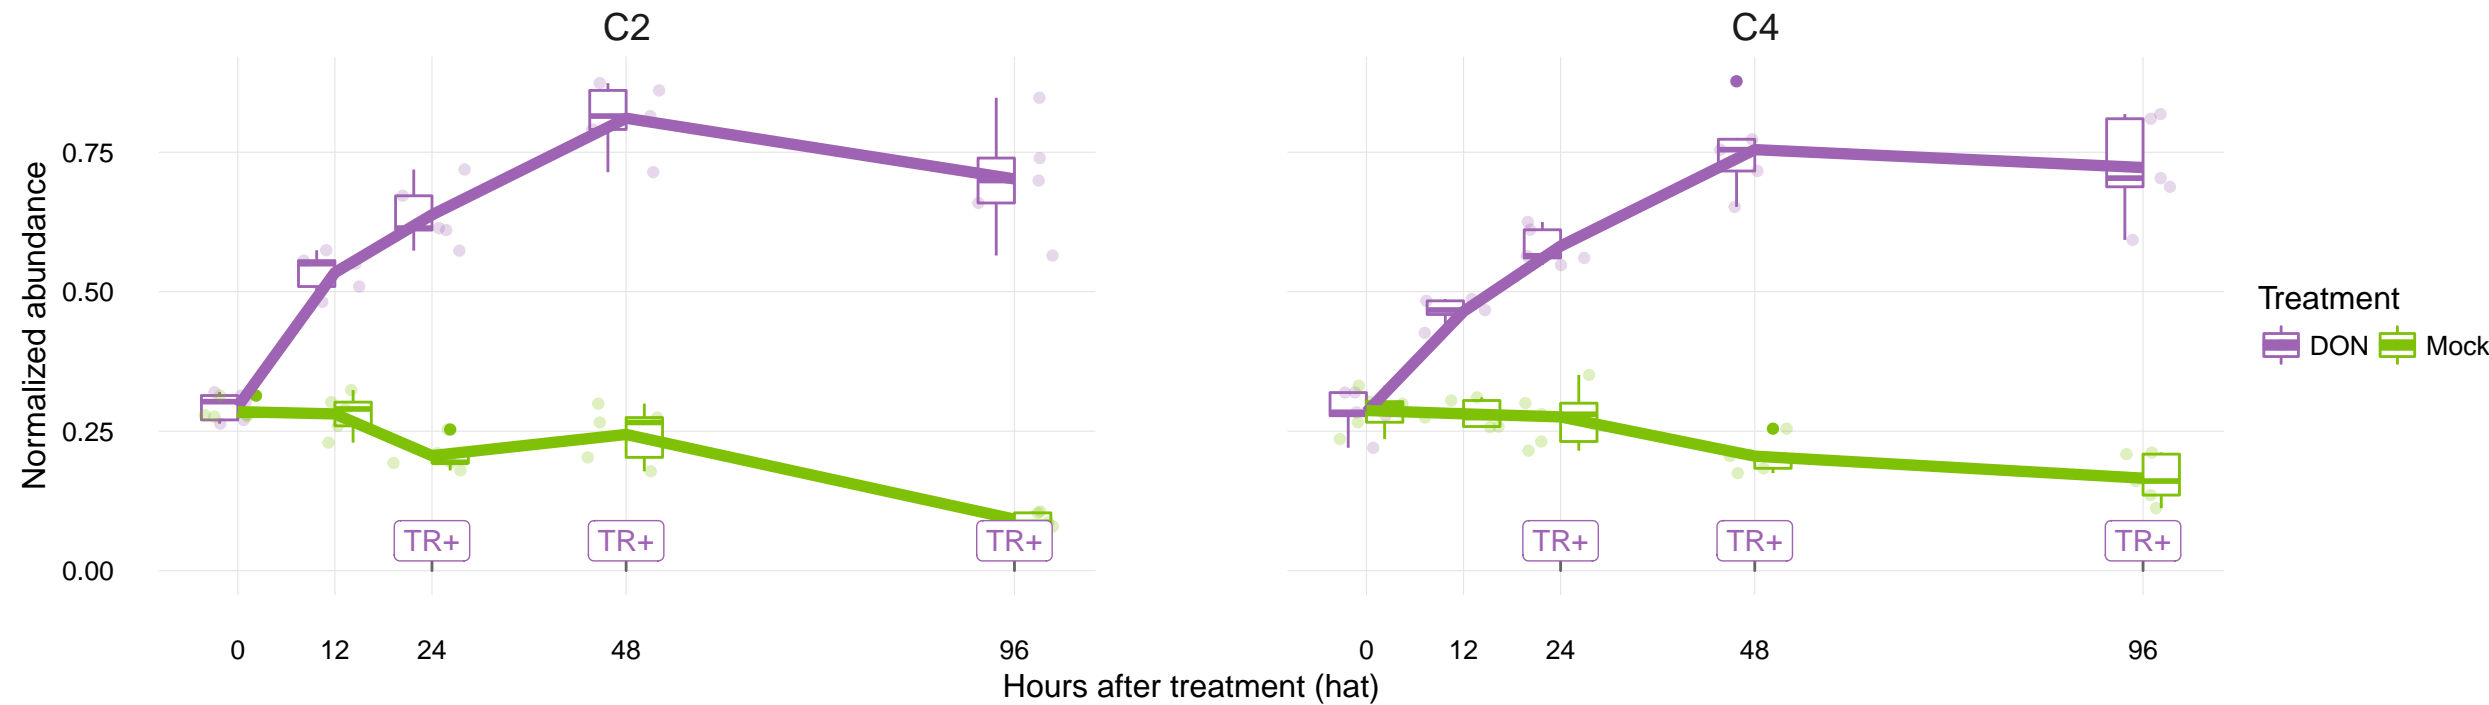

## DON, Mock; different genotypes

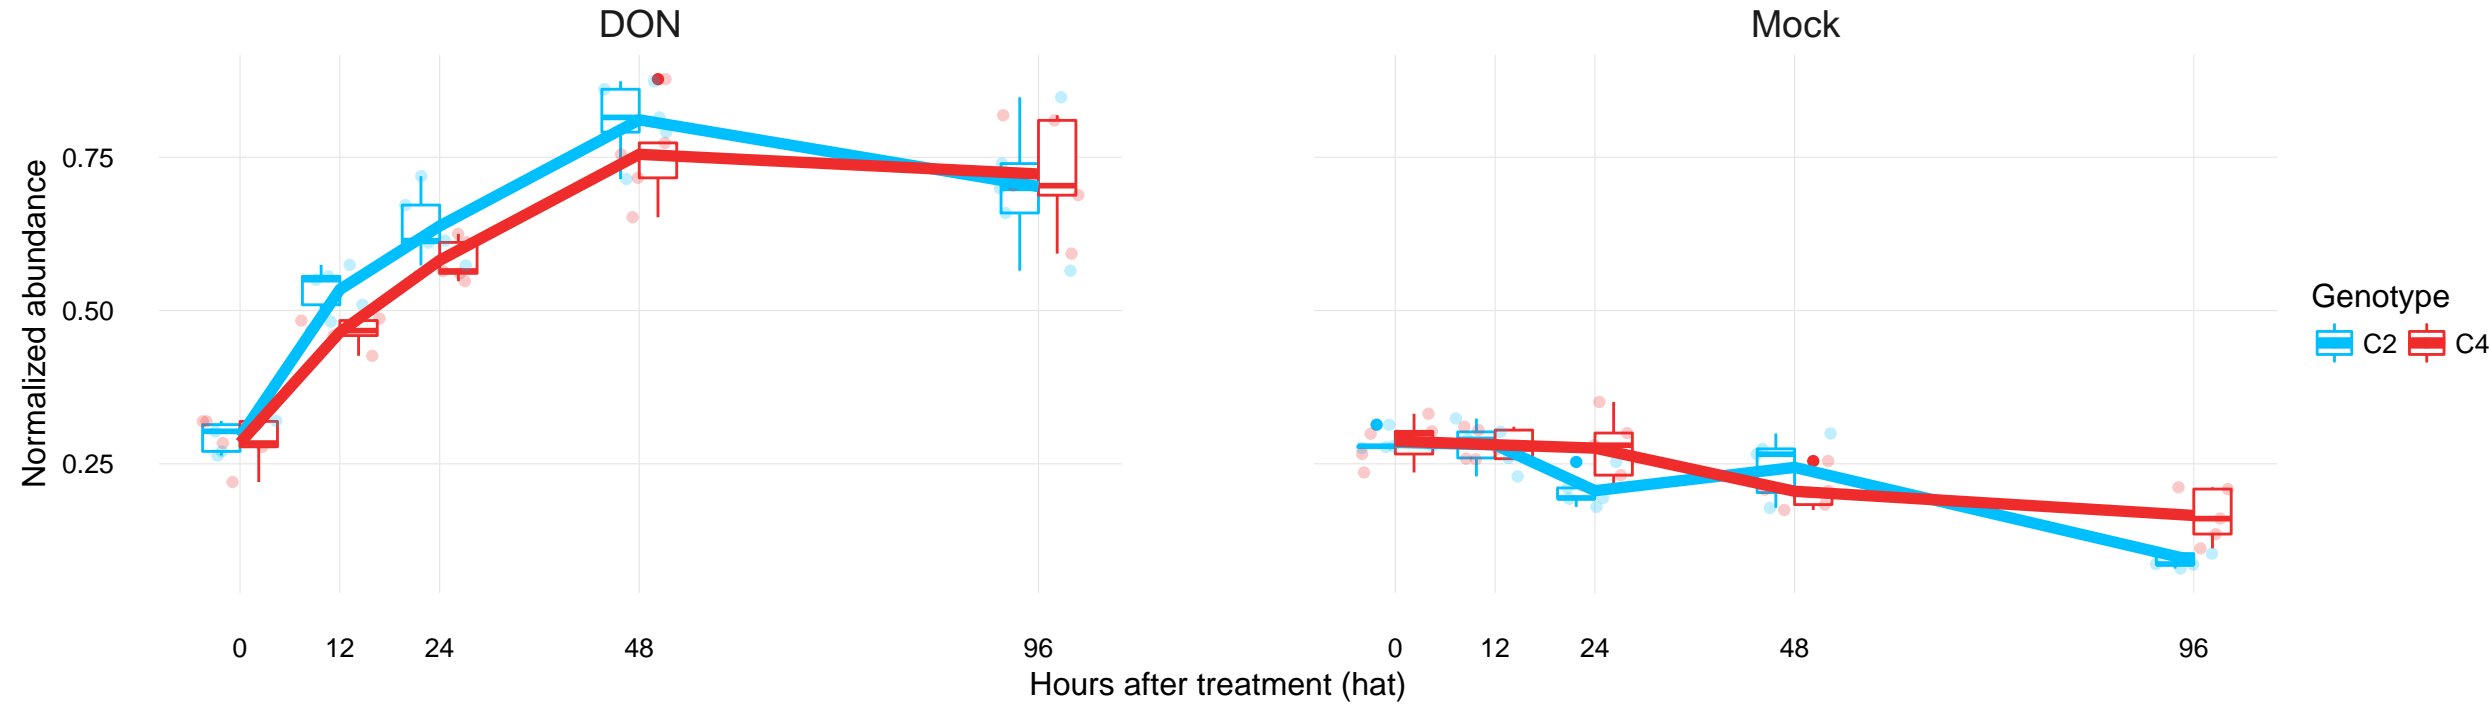

## CM, Remus; different treatments

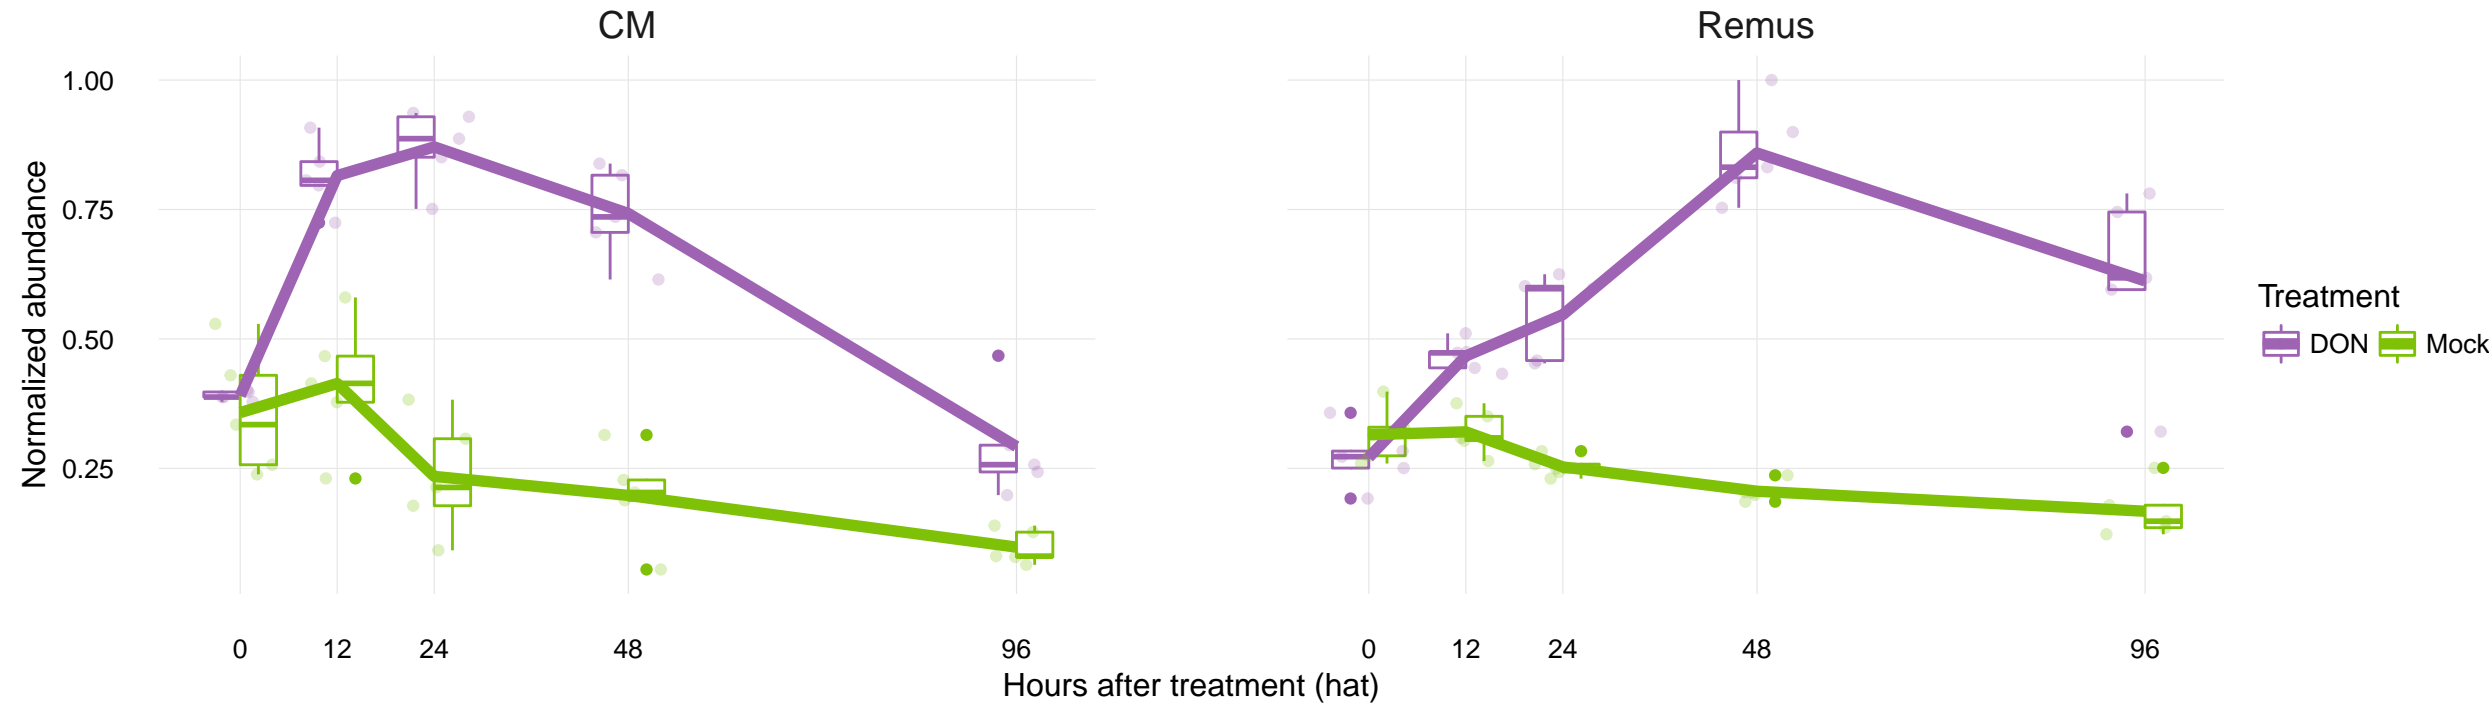

## DON, Mock; all four genotypes

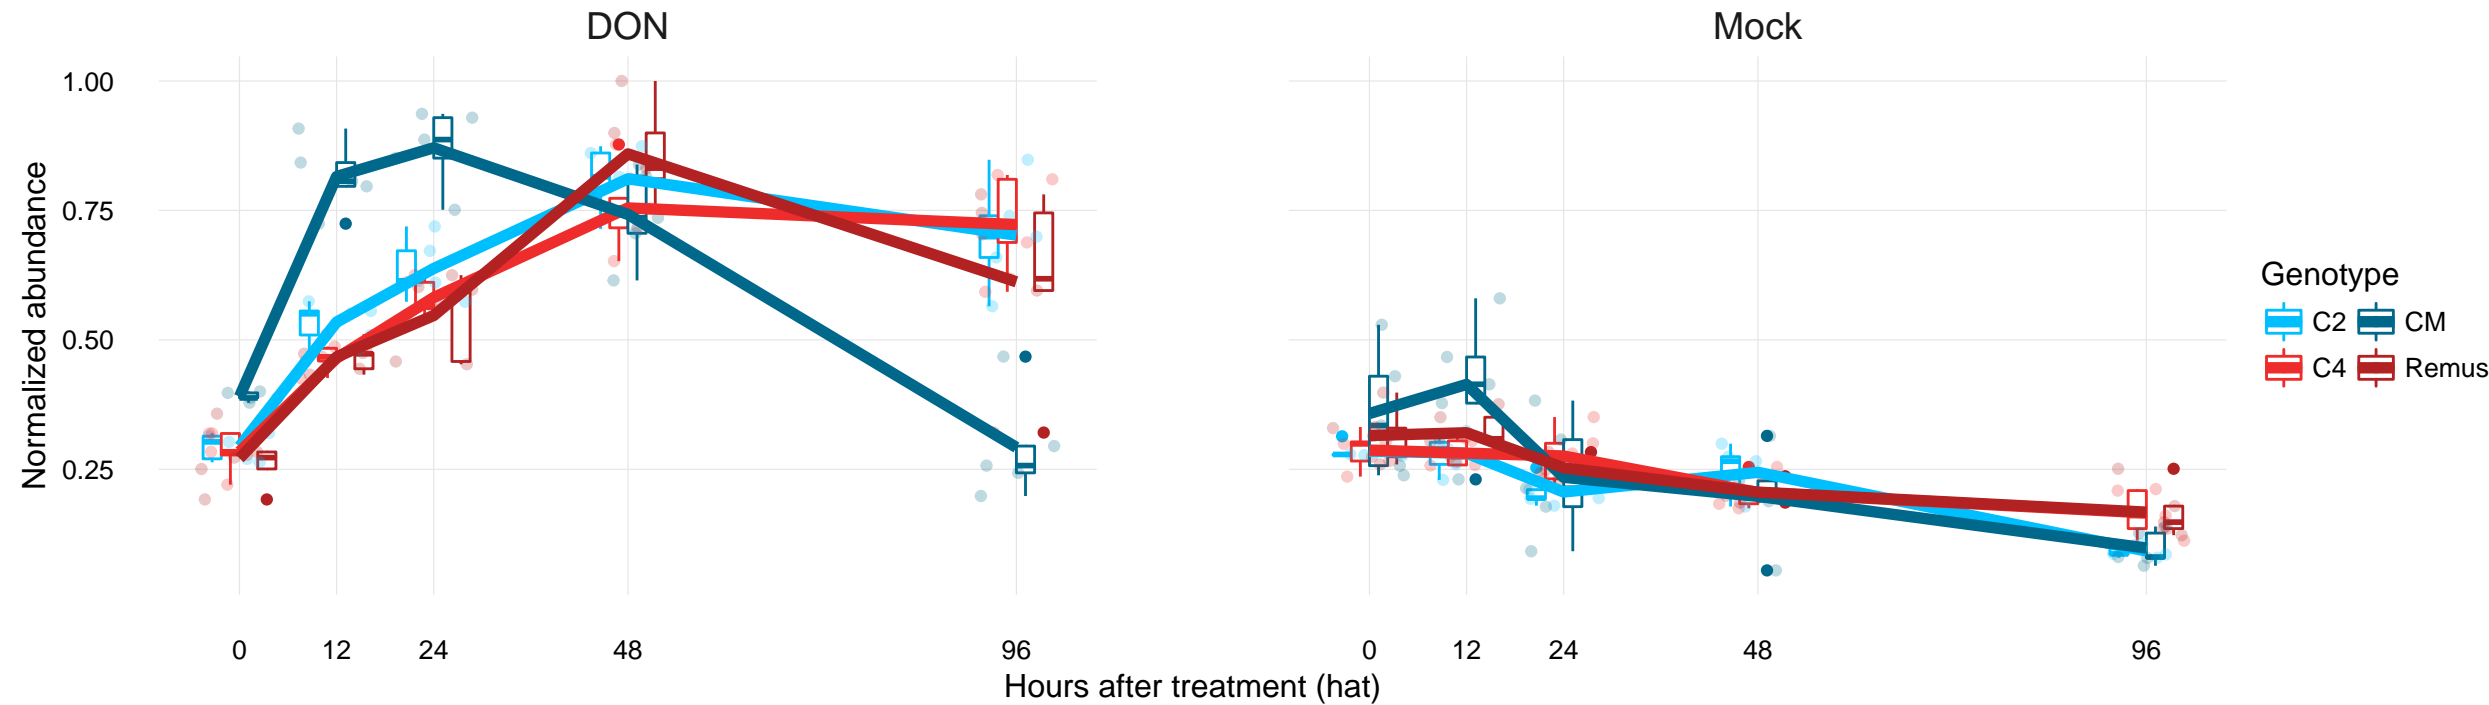

# A.30

Annotated as HCA derivative  
(1 database hit)

|                |                                                |
|----------------|------------------------------------------------|
| MZ             | 369.1183                                       |
| RT             | 9.54 min                                       |
| Normalization  | Indirectly via surrogate<br>in the KPX samples |
| Cluster        | Cluster 3                                      |
| Cn total / Phe | 17 / 9                                         |

## C2, C4; different treatments

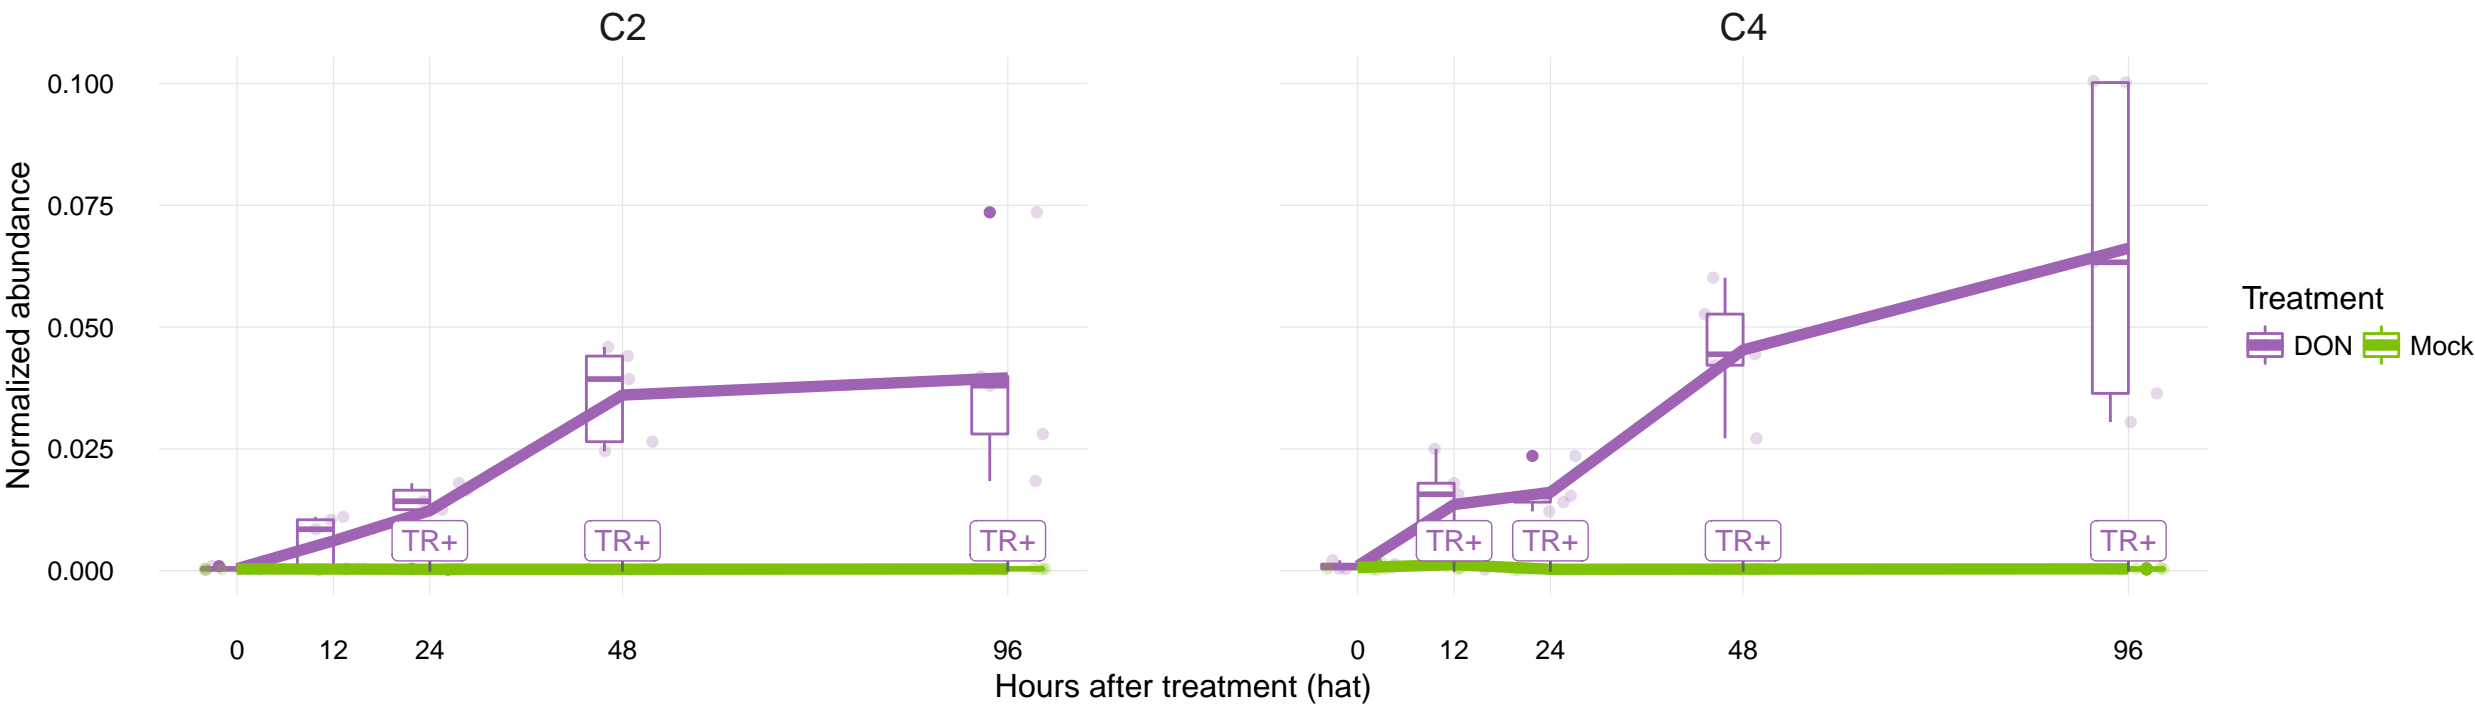

## DON, Mock; different genotypes

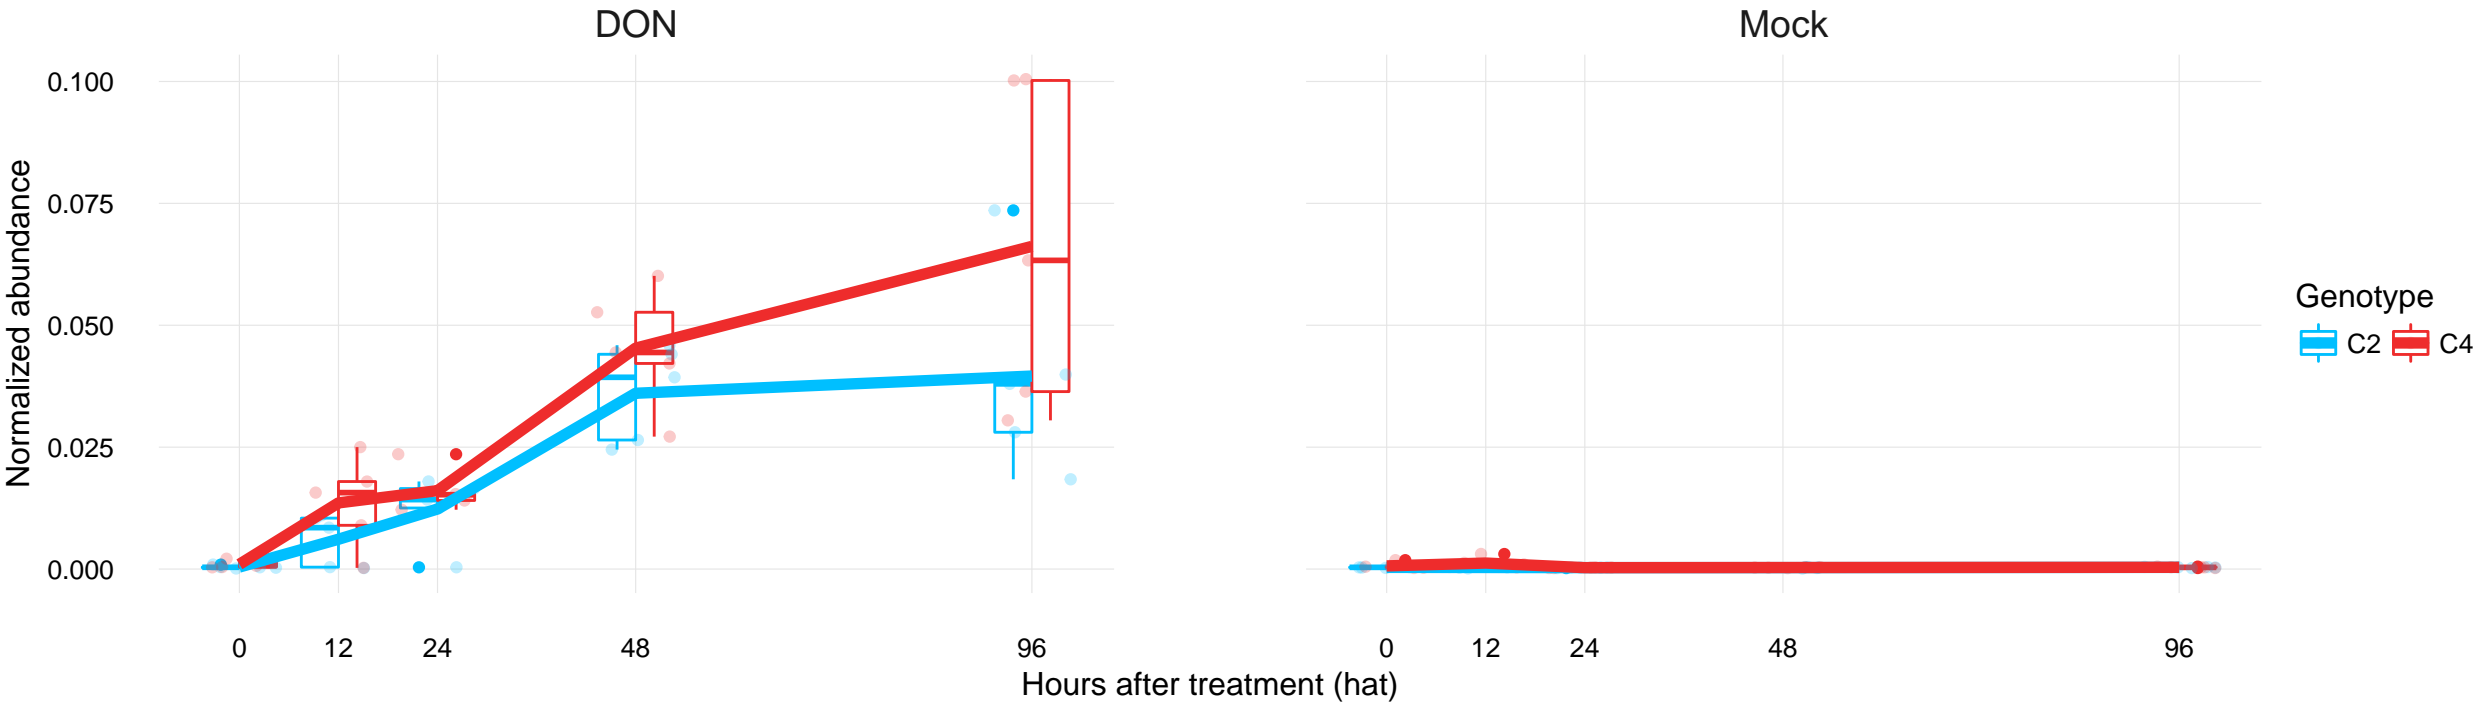

## CM, Remus; different treatments

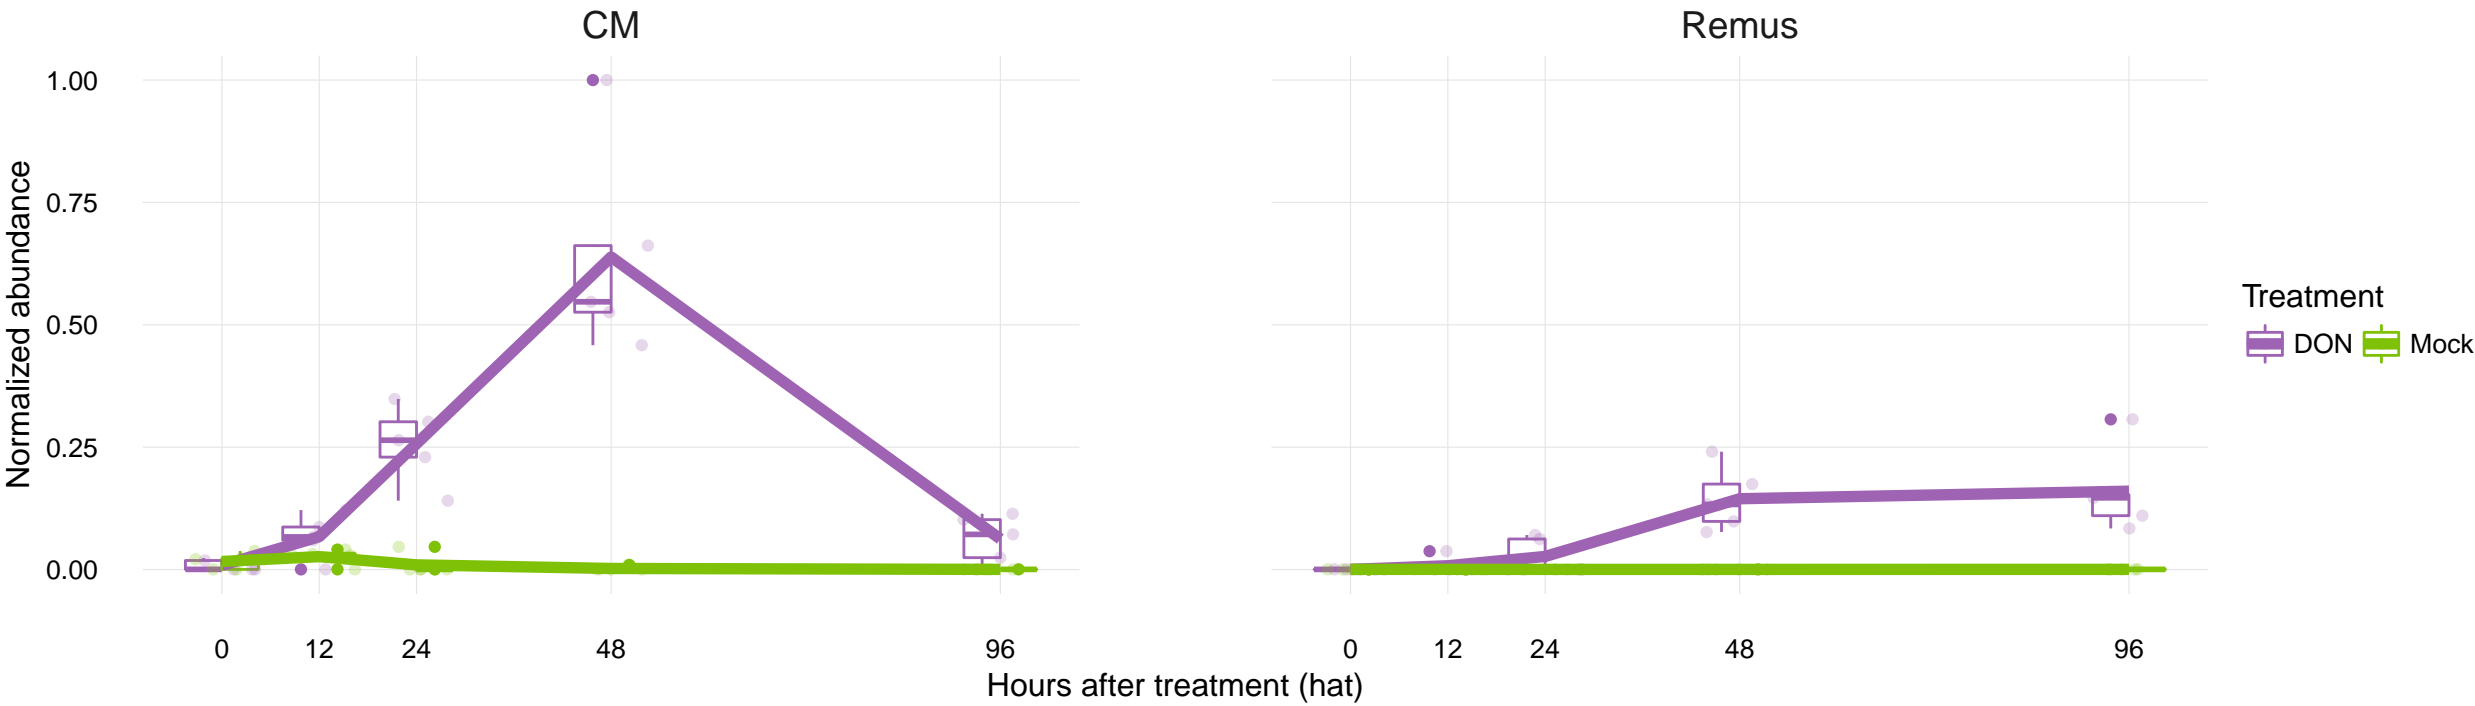

## DON, Mock; all four genotypes

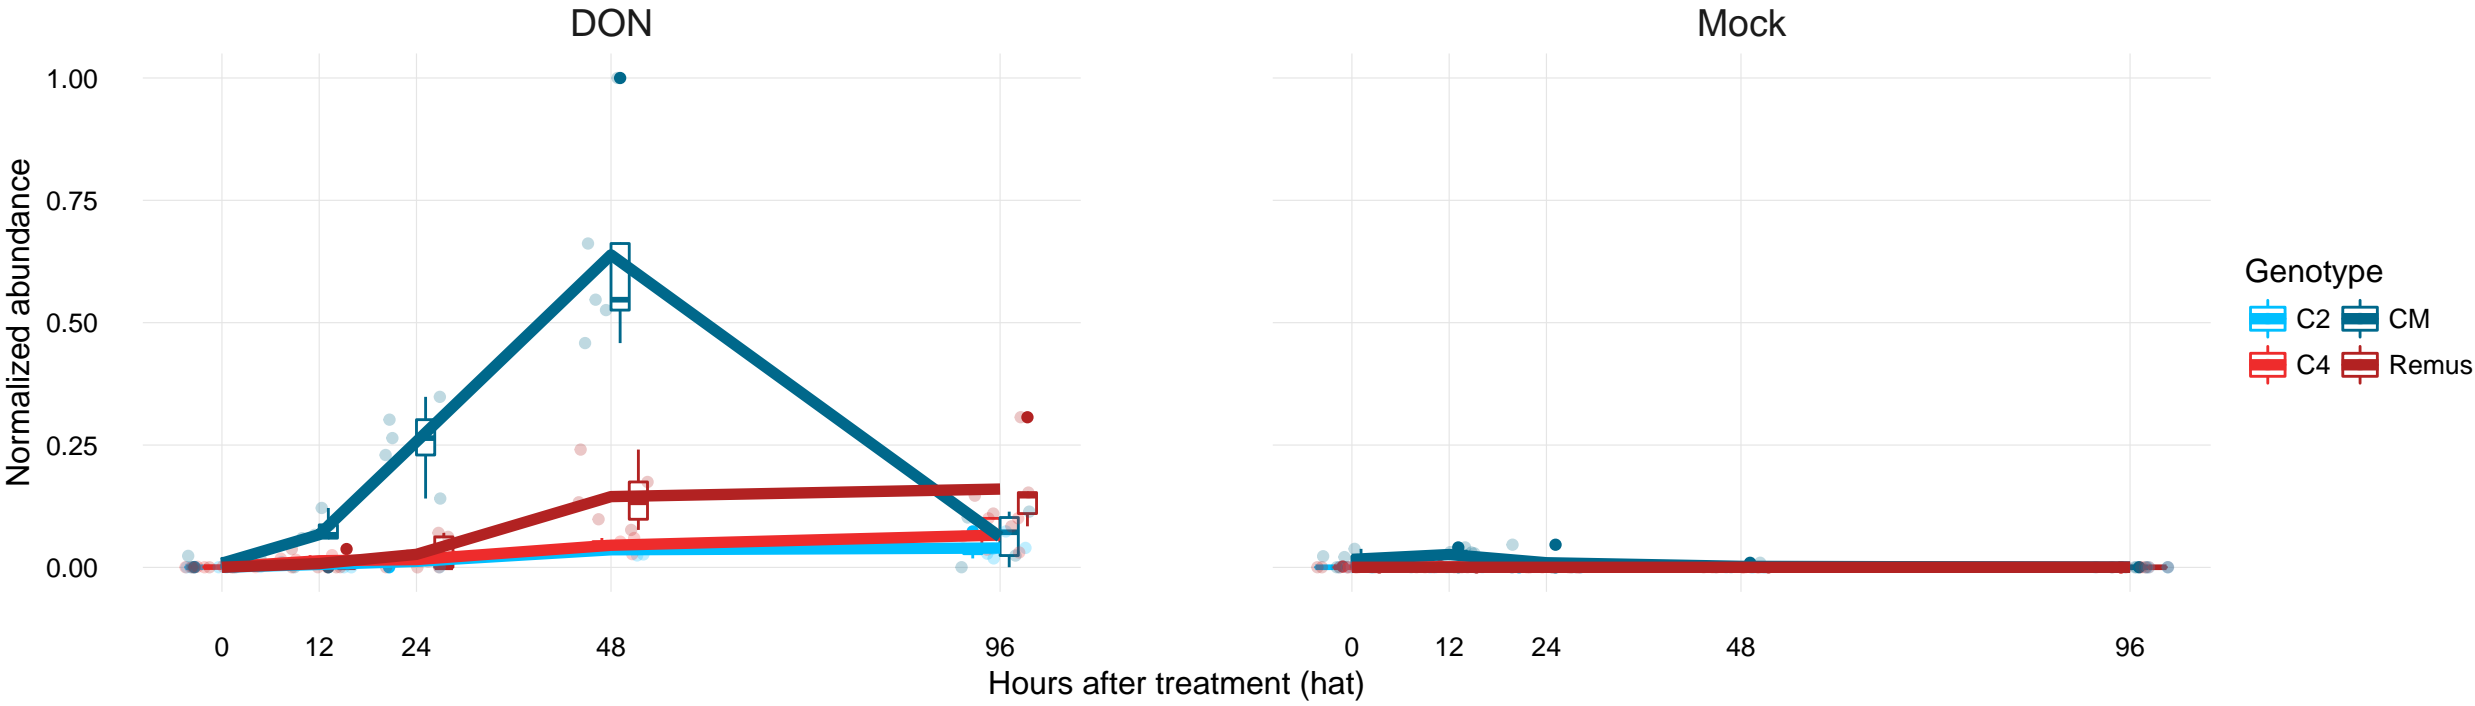

# A.29

Annotated as HCA derivative  
(3 database hits)

|                |                          |
|----------------|--------------------------|
| MZ             | 195.0653                 |
| RT             | 9.51 min                 |
| Normalization  | Directly via KPX samples |
| Cluster        | Cluster 3                |
| Cn total / Phe | 10 /                     |

## C2, C4; different treatments

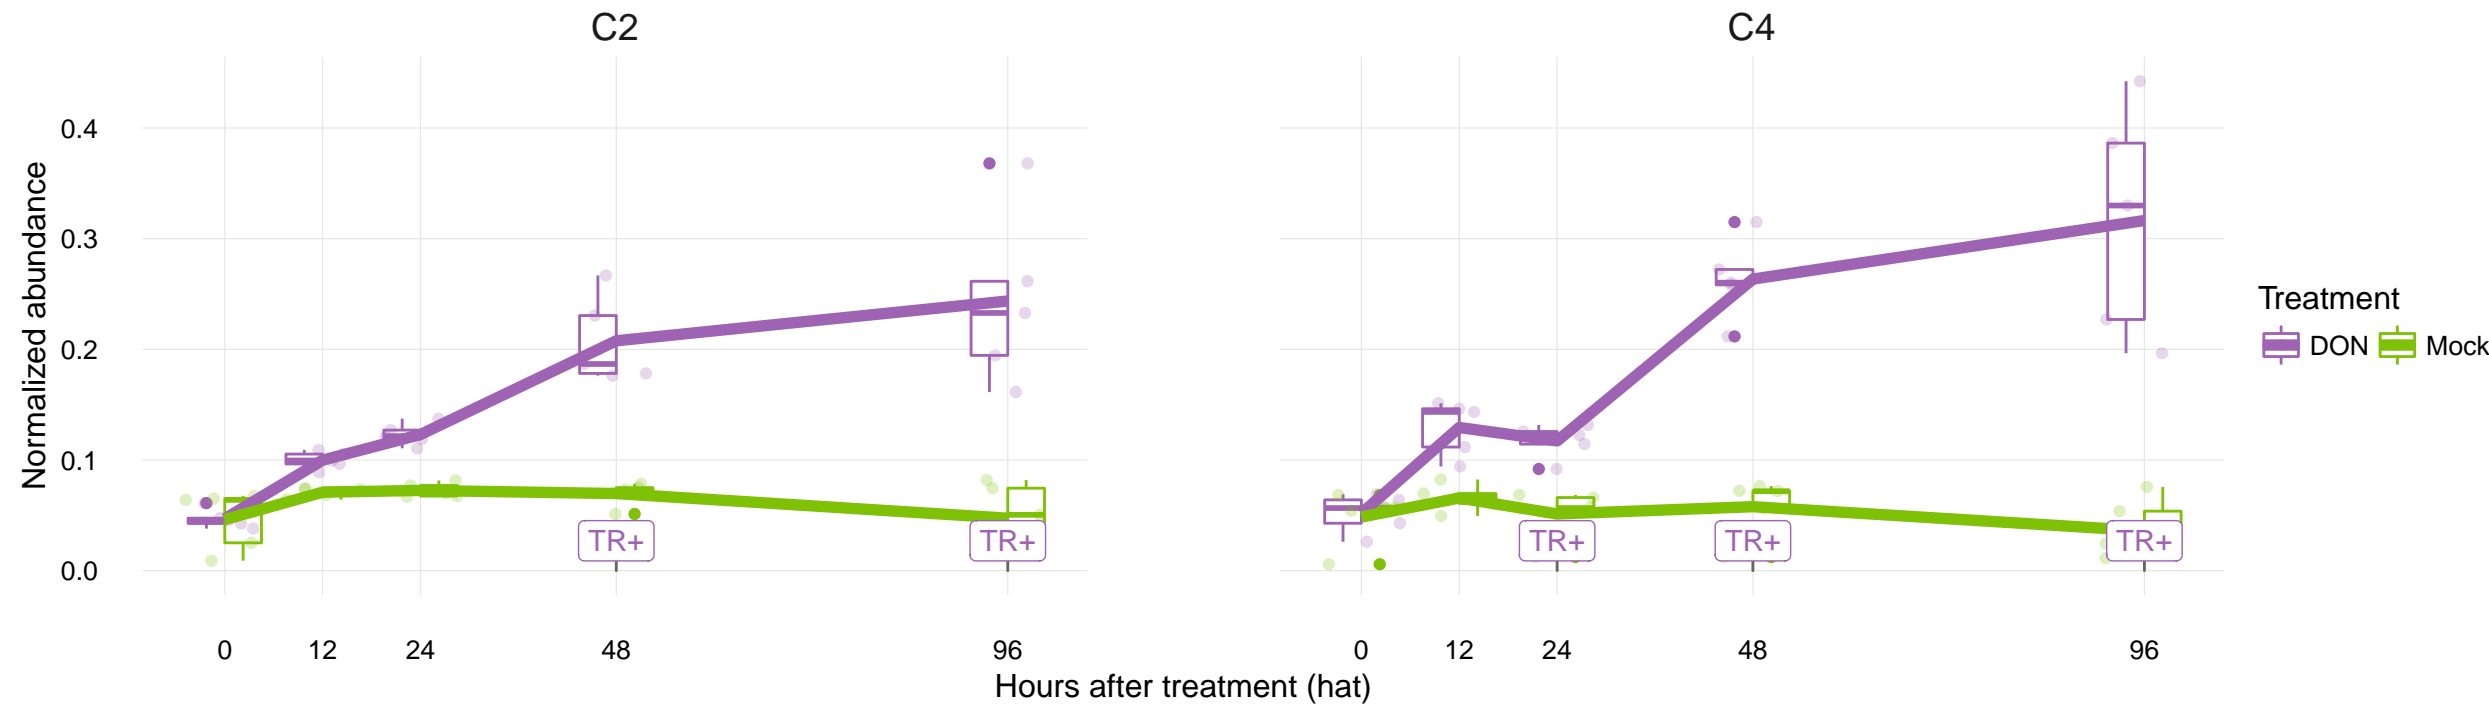

## DON, Mock; different genotypes

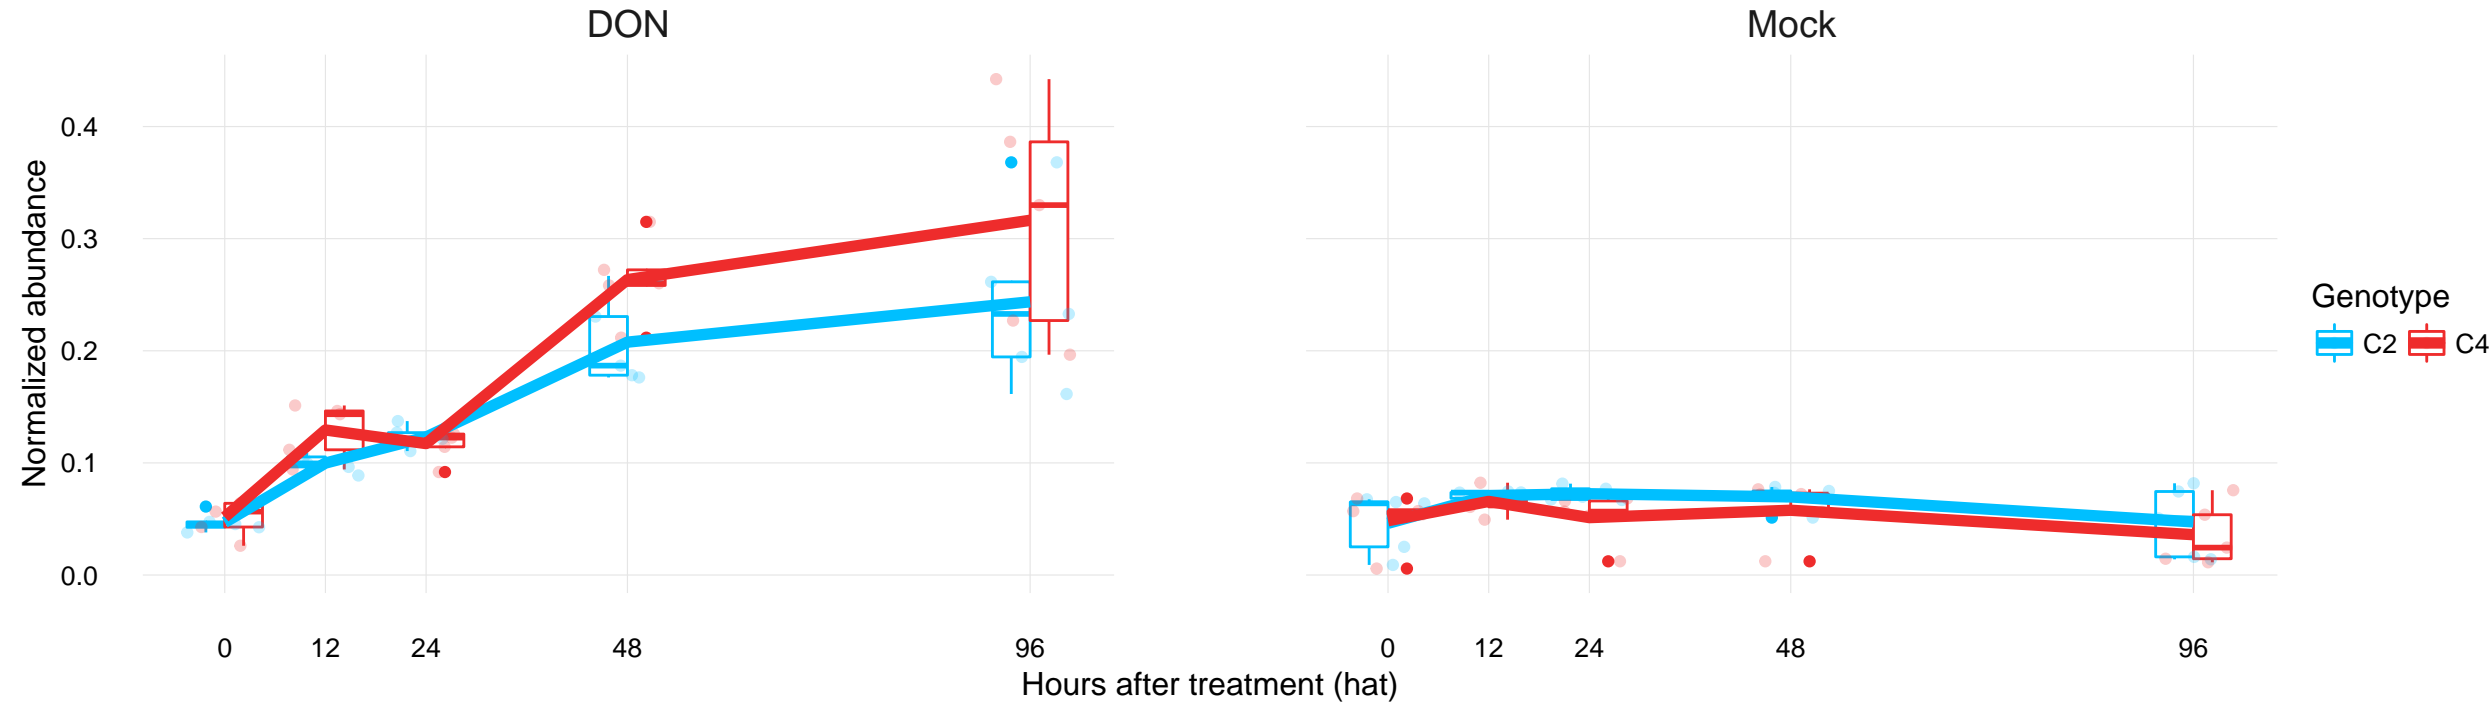

## CM, Remus; different treatments

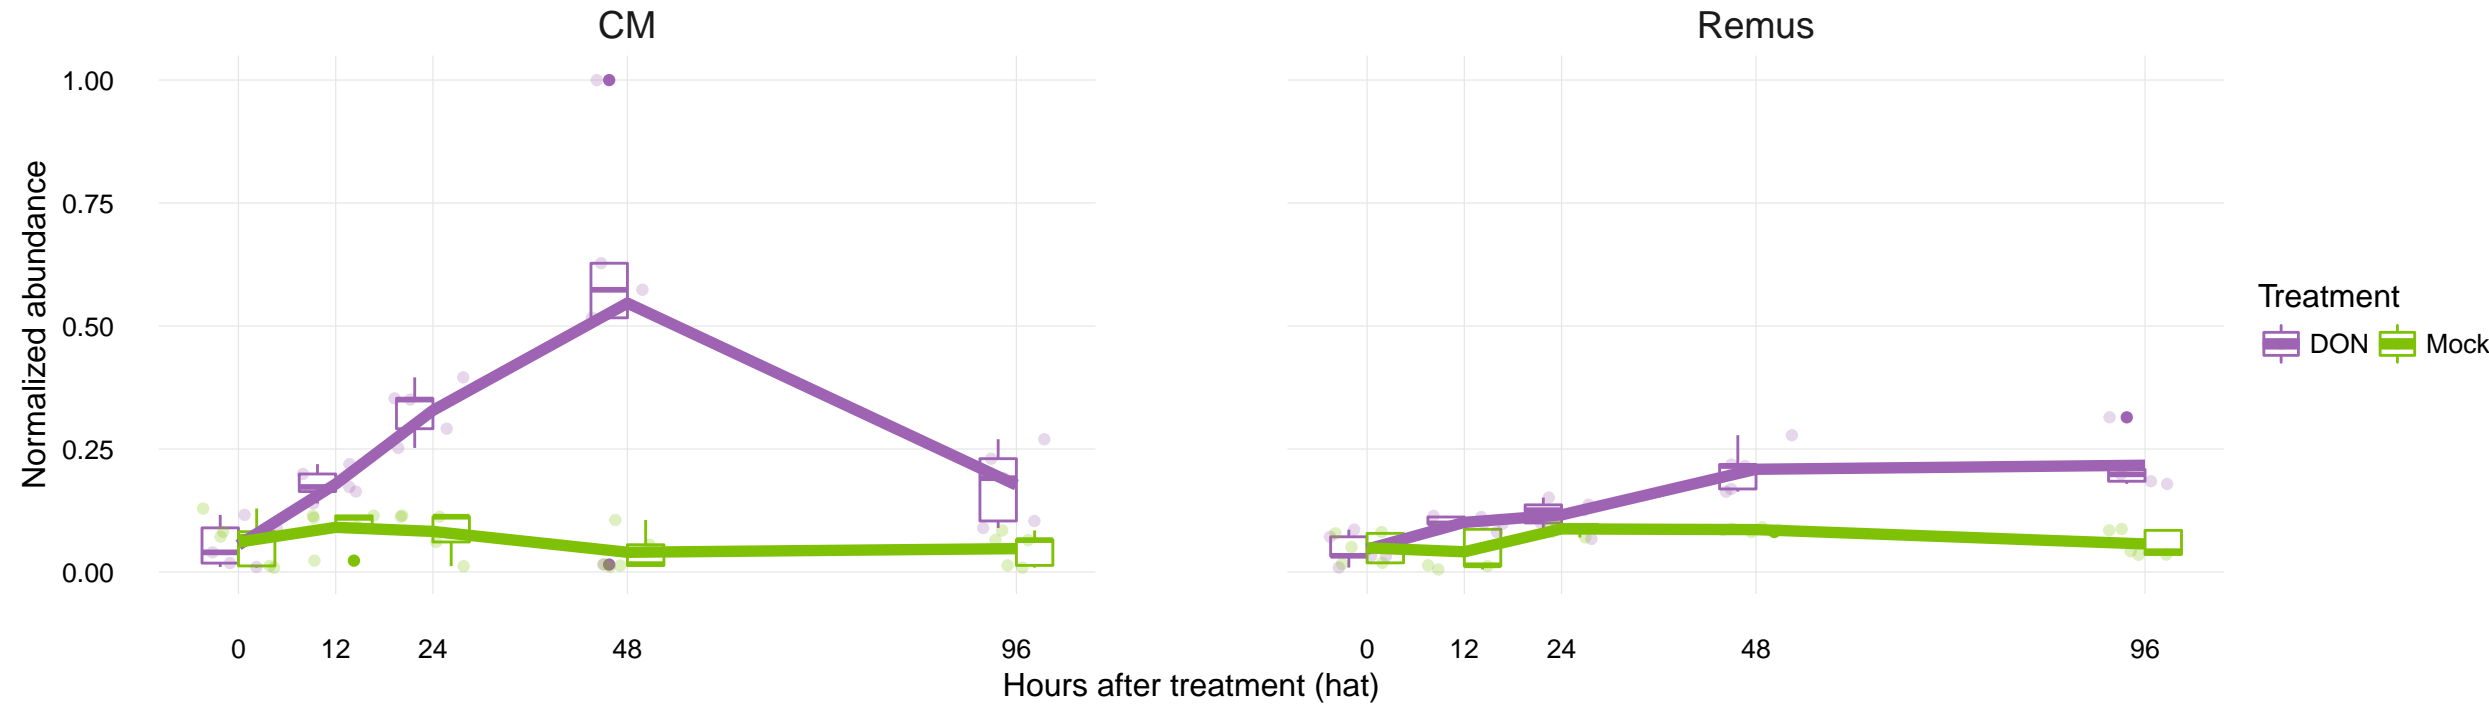

## DON, Mock; all four genotypes

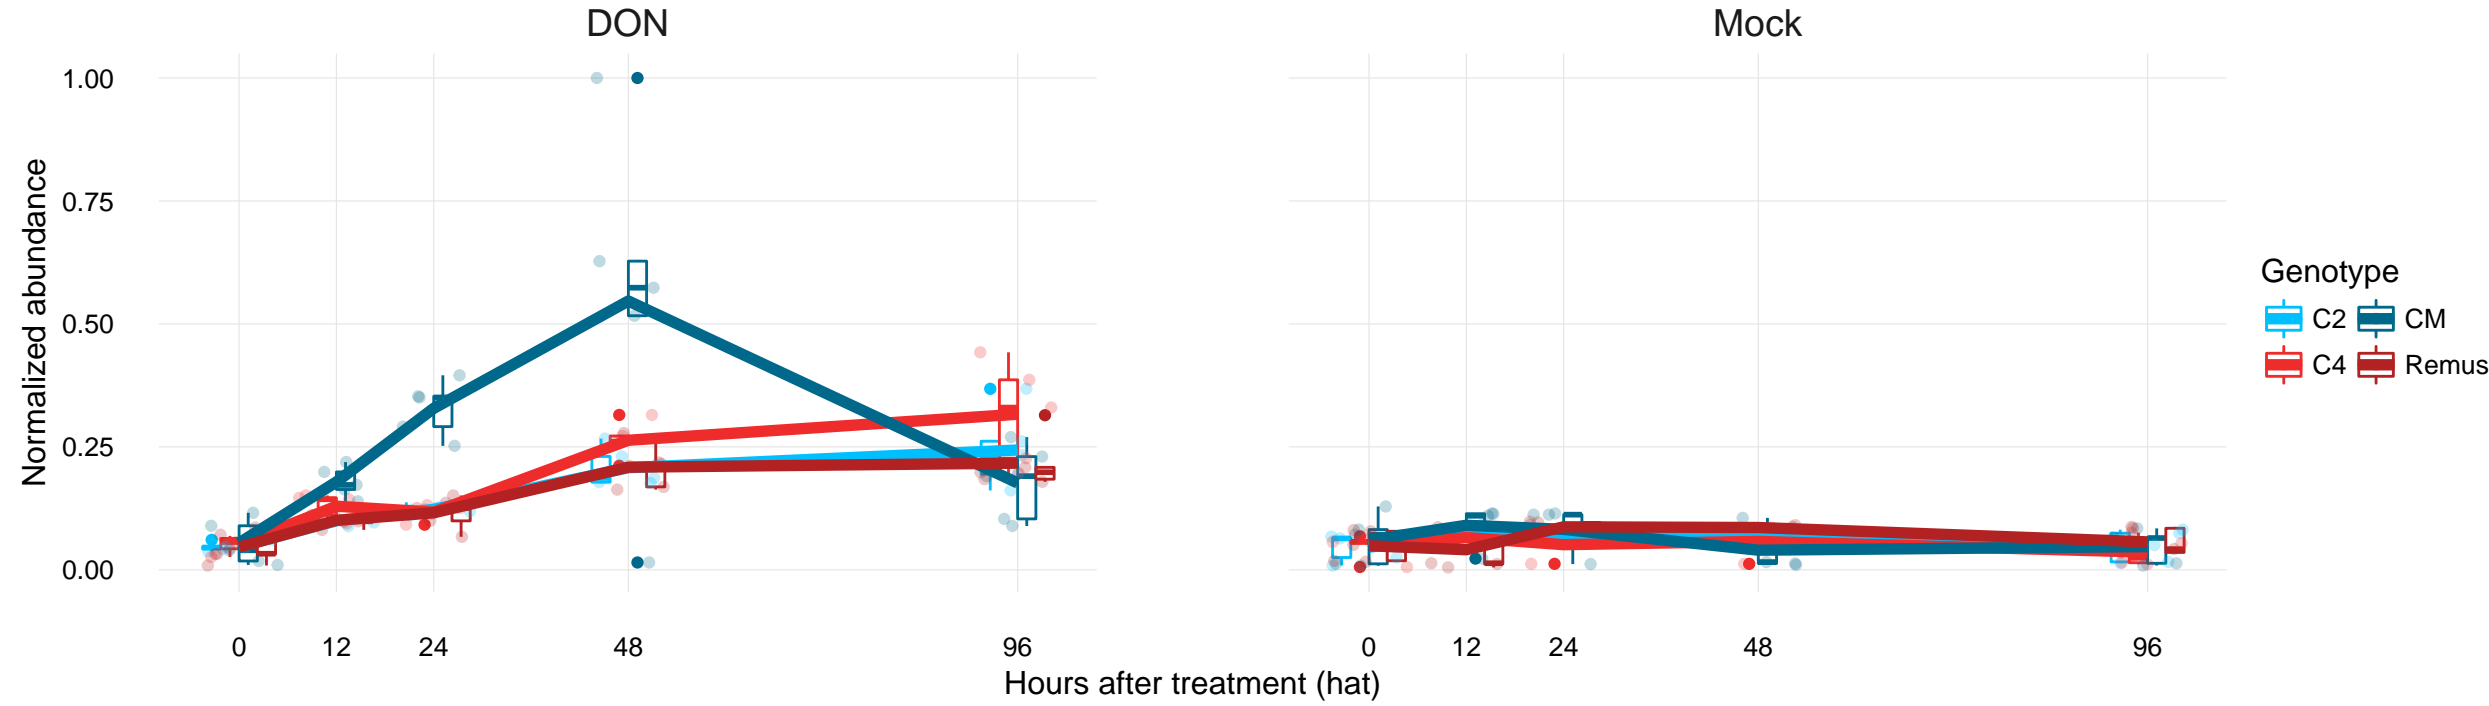



# A.38

Annotated as HCA derivative  
(3 database hits)

|                |                          |
|----------------|--------------------------|
| MZ             | 195.0653                 |
| RT             | 10.29 min                |
| Normalization  | Directly via KPX samples |
| Cluster        | Cluster 3                |
| Cn total / Phe | 10 / 9                   |

## C2, C4; different treatments

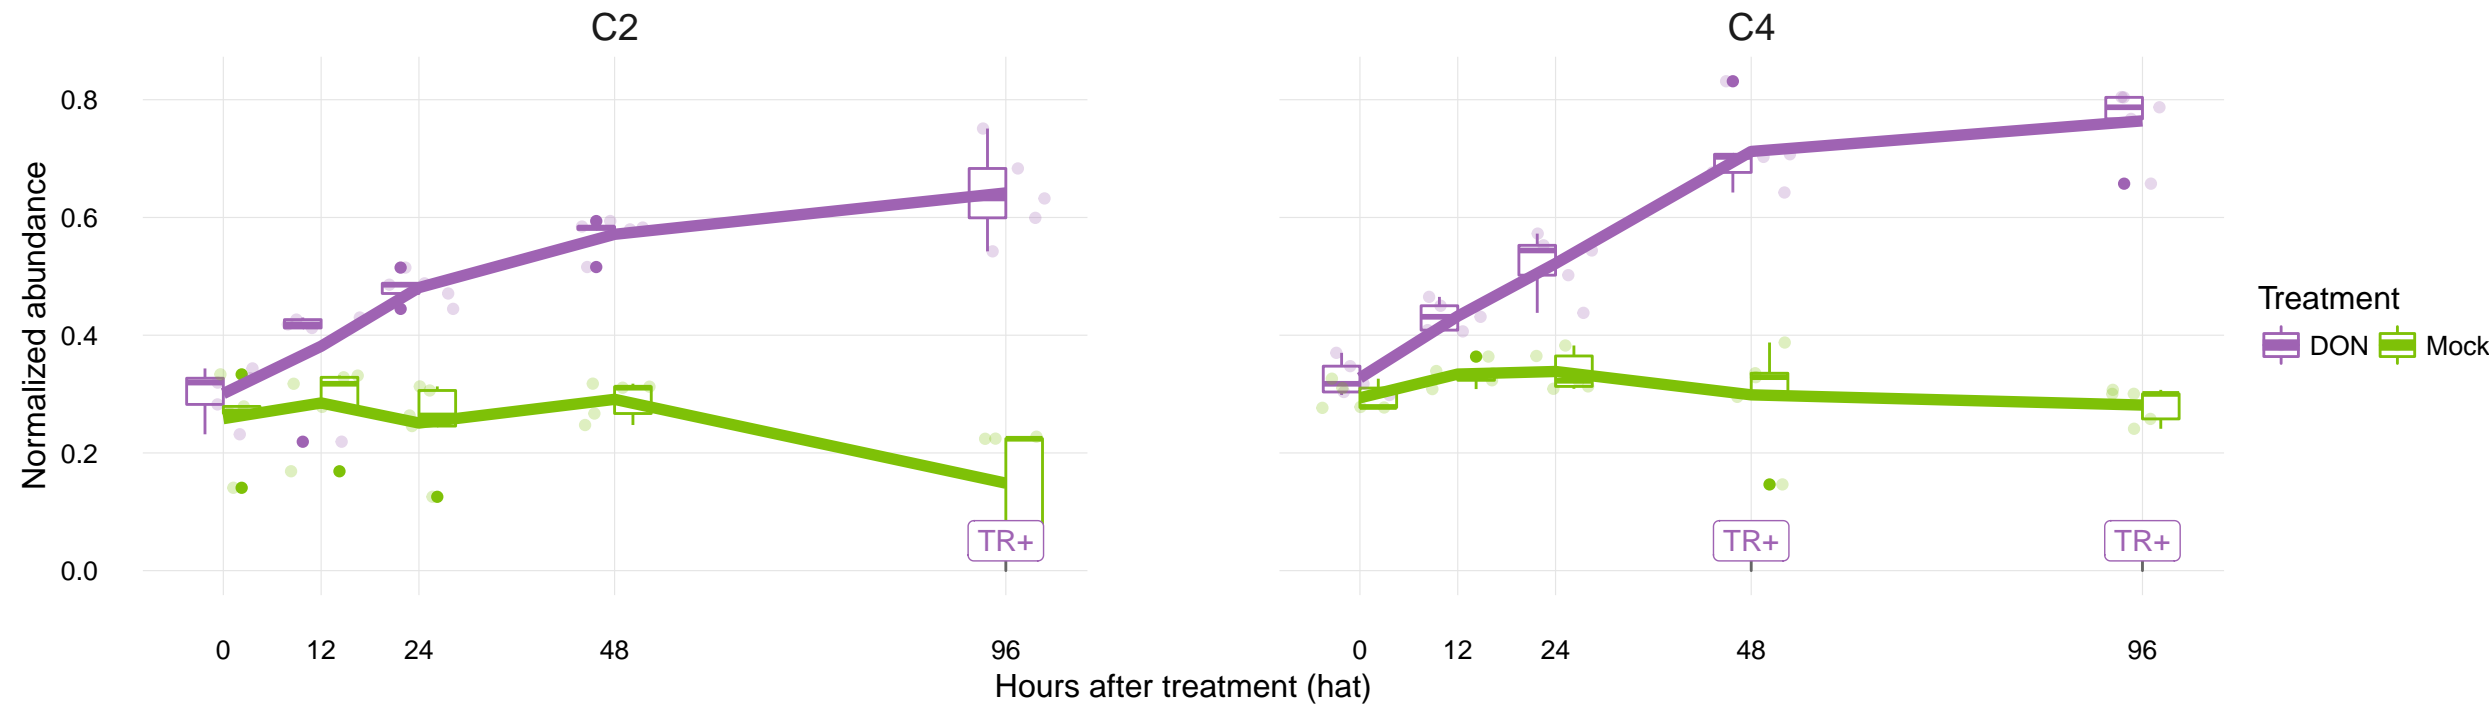

## DON, Mock; different genotypes

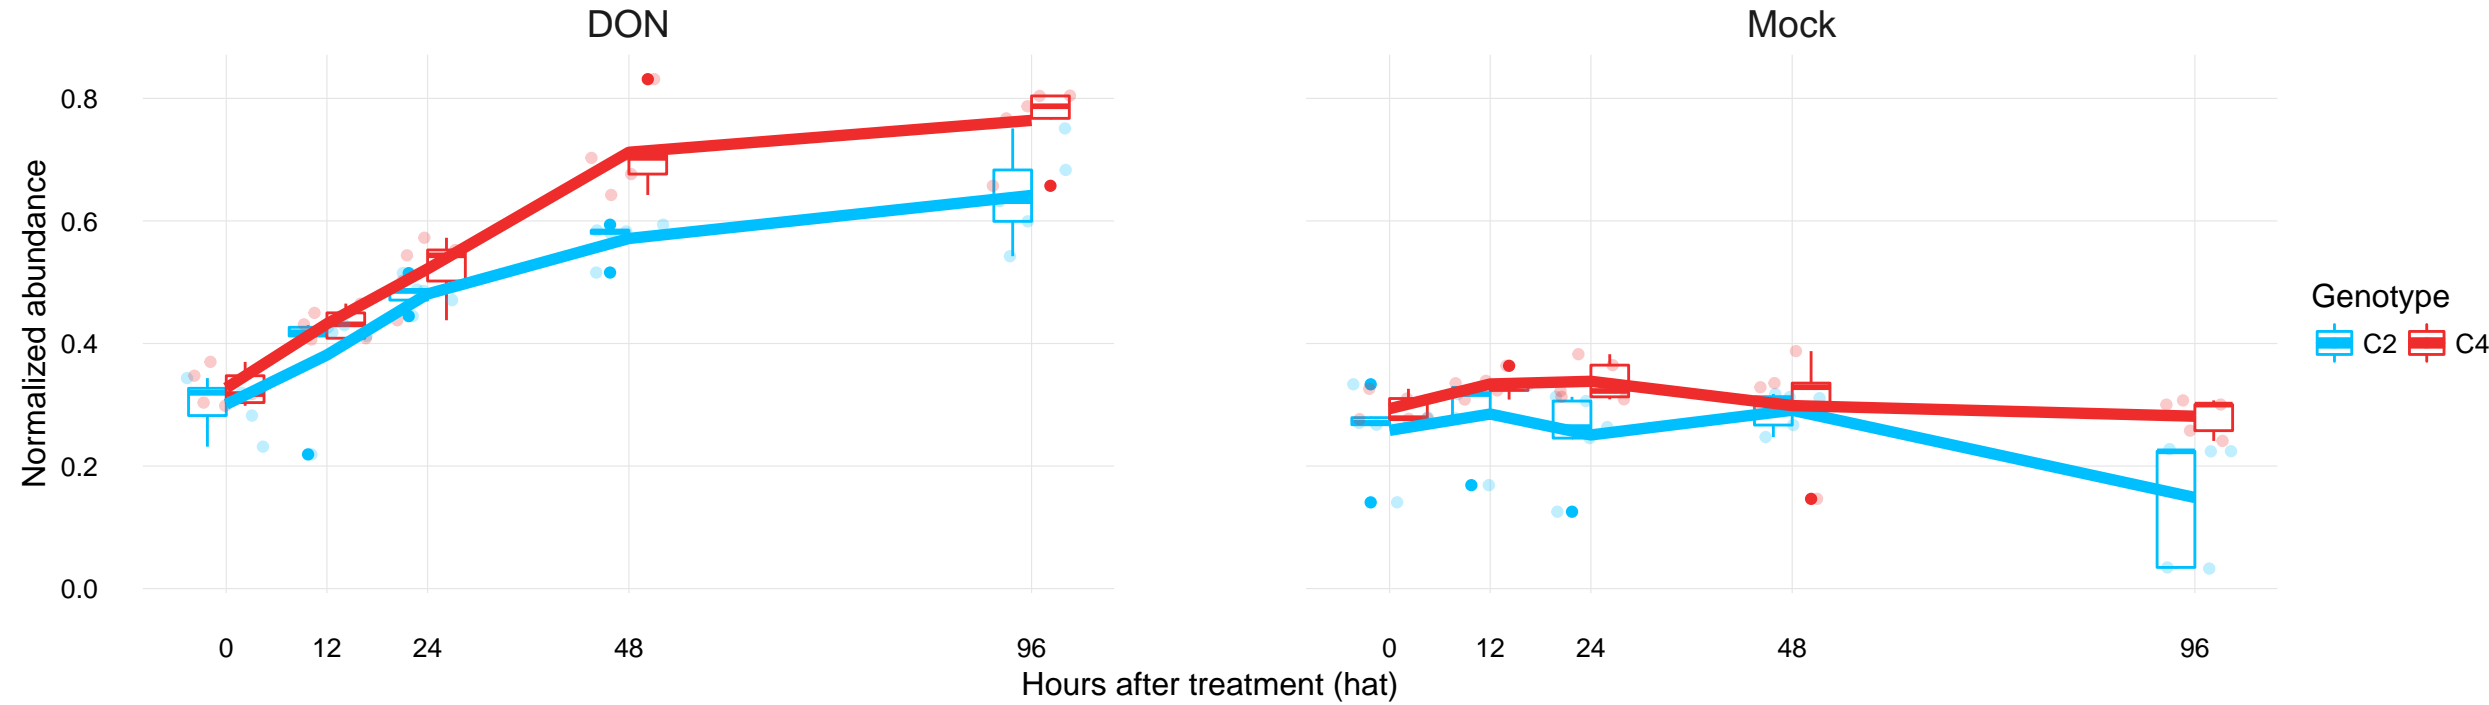

## CM, Remus; different treatments

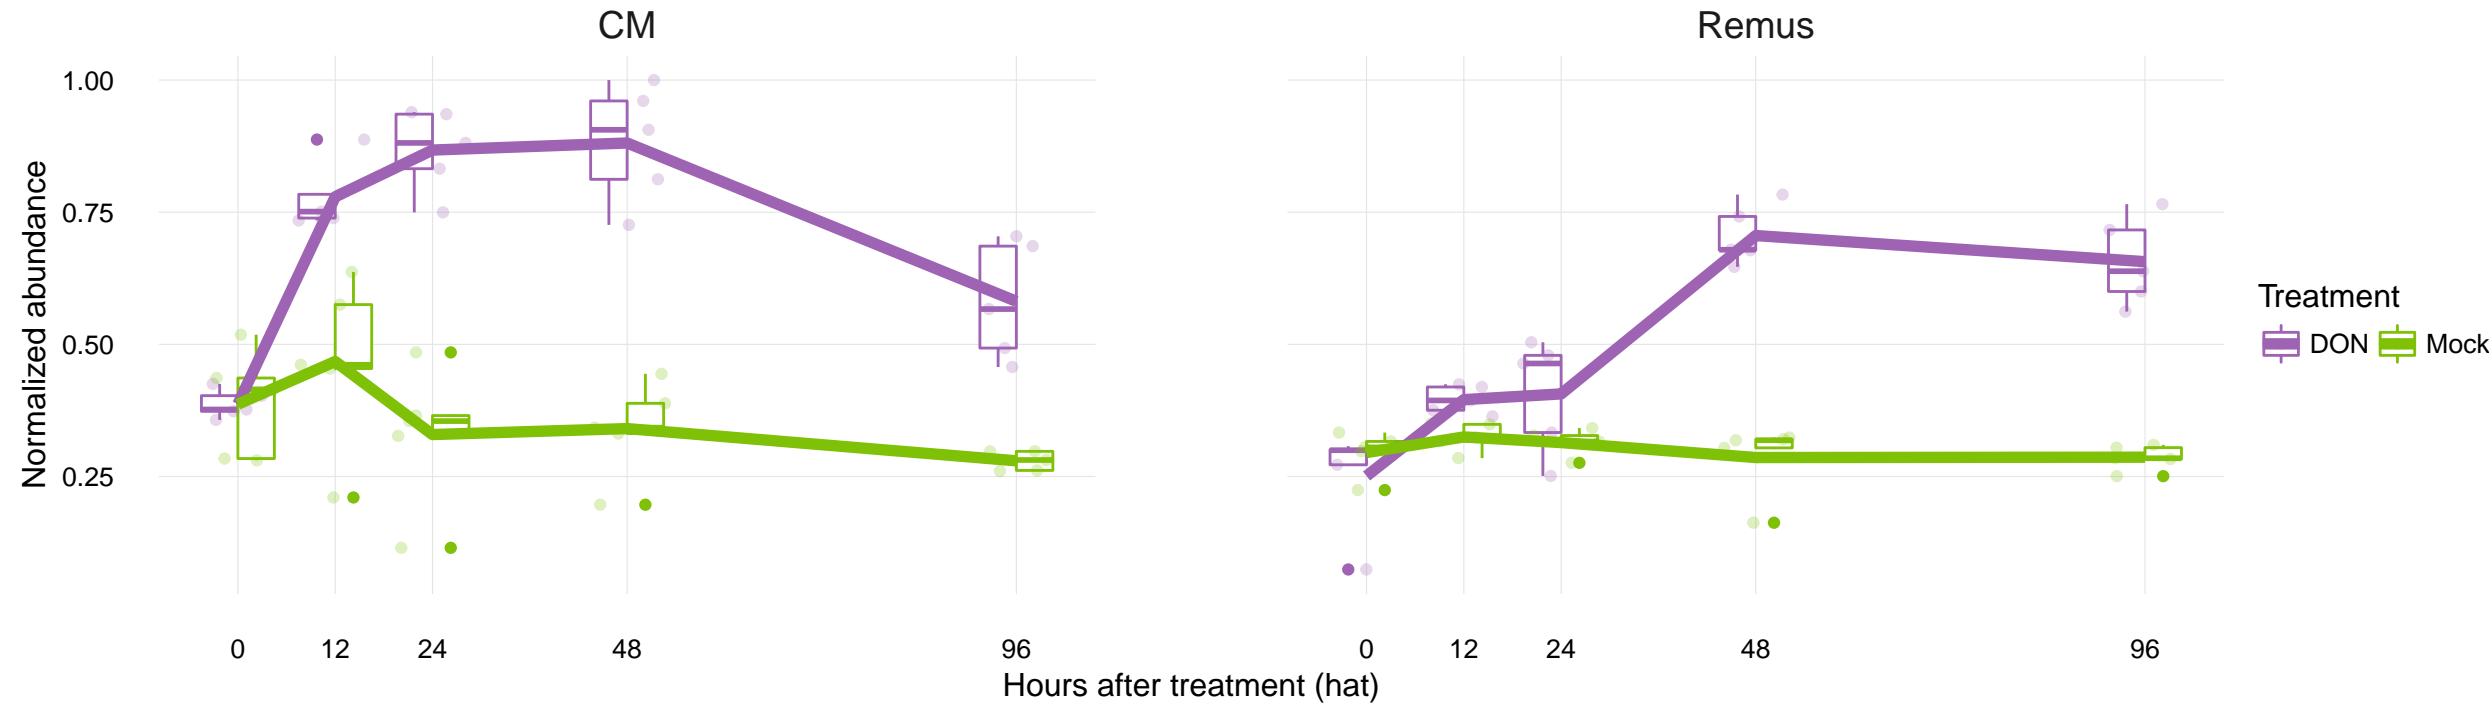

## DON, Mock; all four genotypes

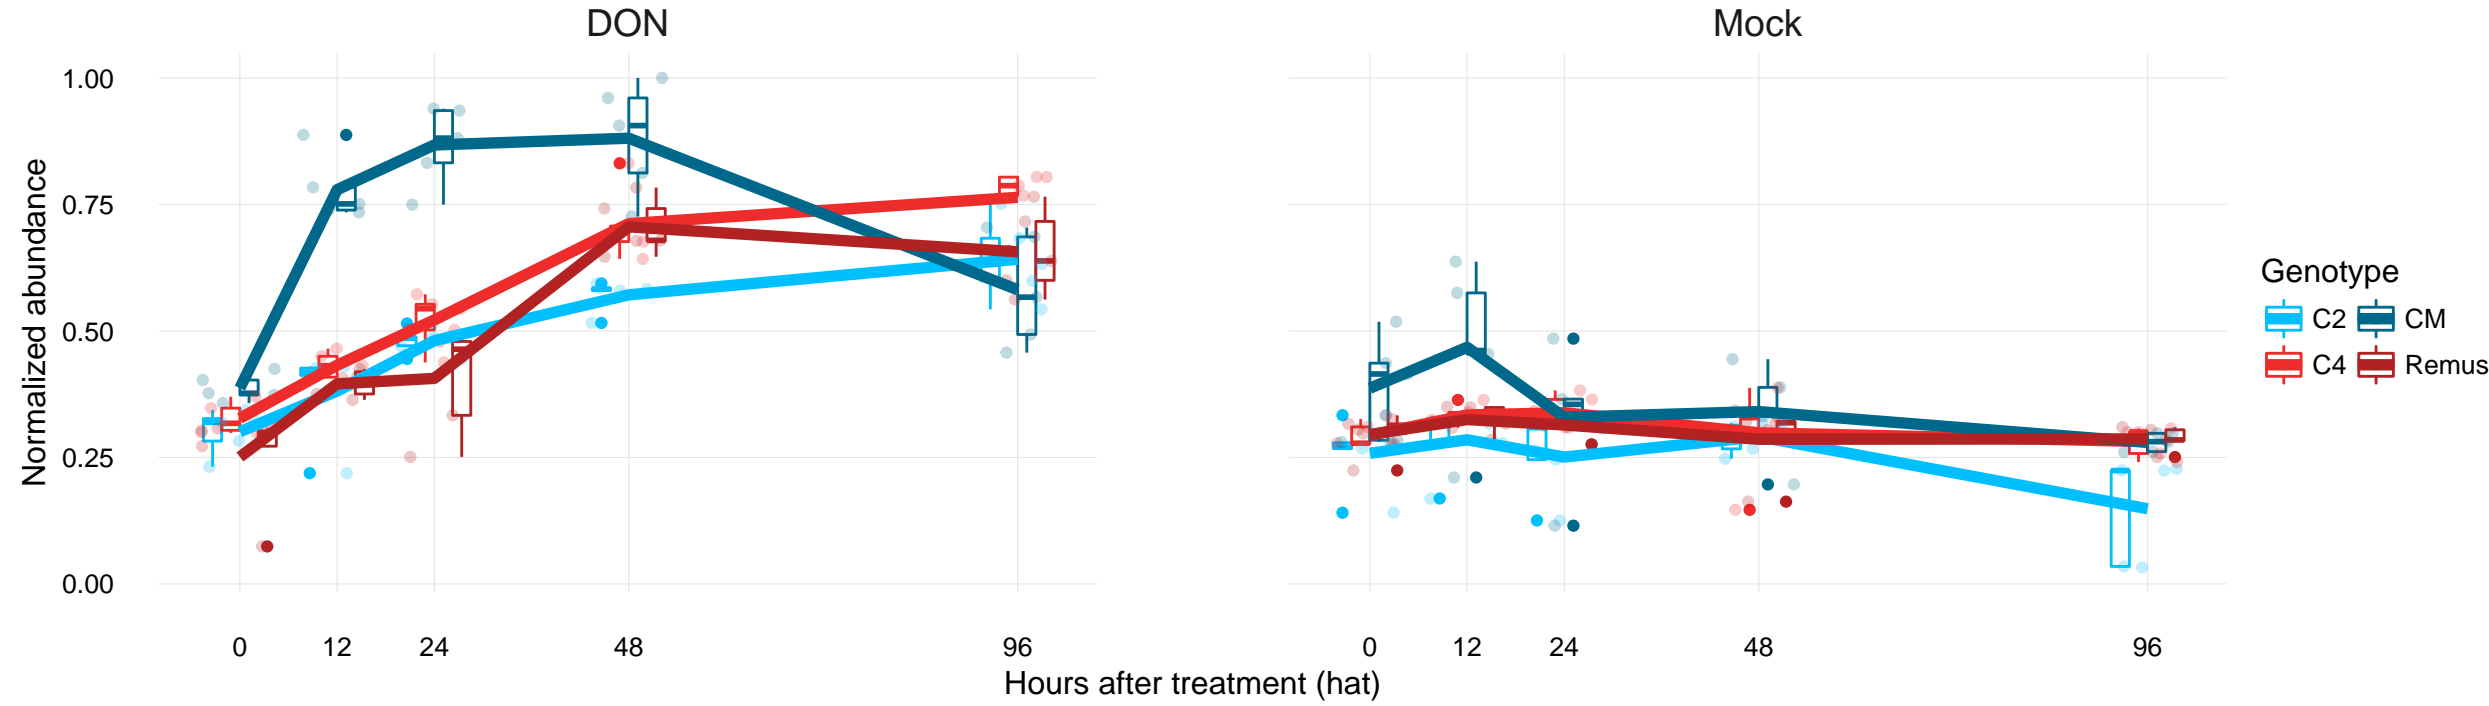

# A.60

Annotated as Flavonoid or Lignan  
(10 database hits)

|                |                          |
|----------------|--------------------------|
| MZ             | 359.1489                 |
| RT             | 12.8 min                 |
| Normalization  | Directly via KPX samples |
| Cluster        | Cluster 3                |
| Cn total / Phe | 20 /                     |

## C2, C4; different treatments

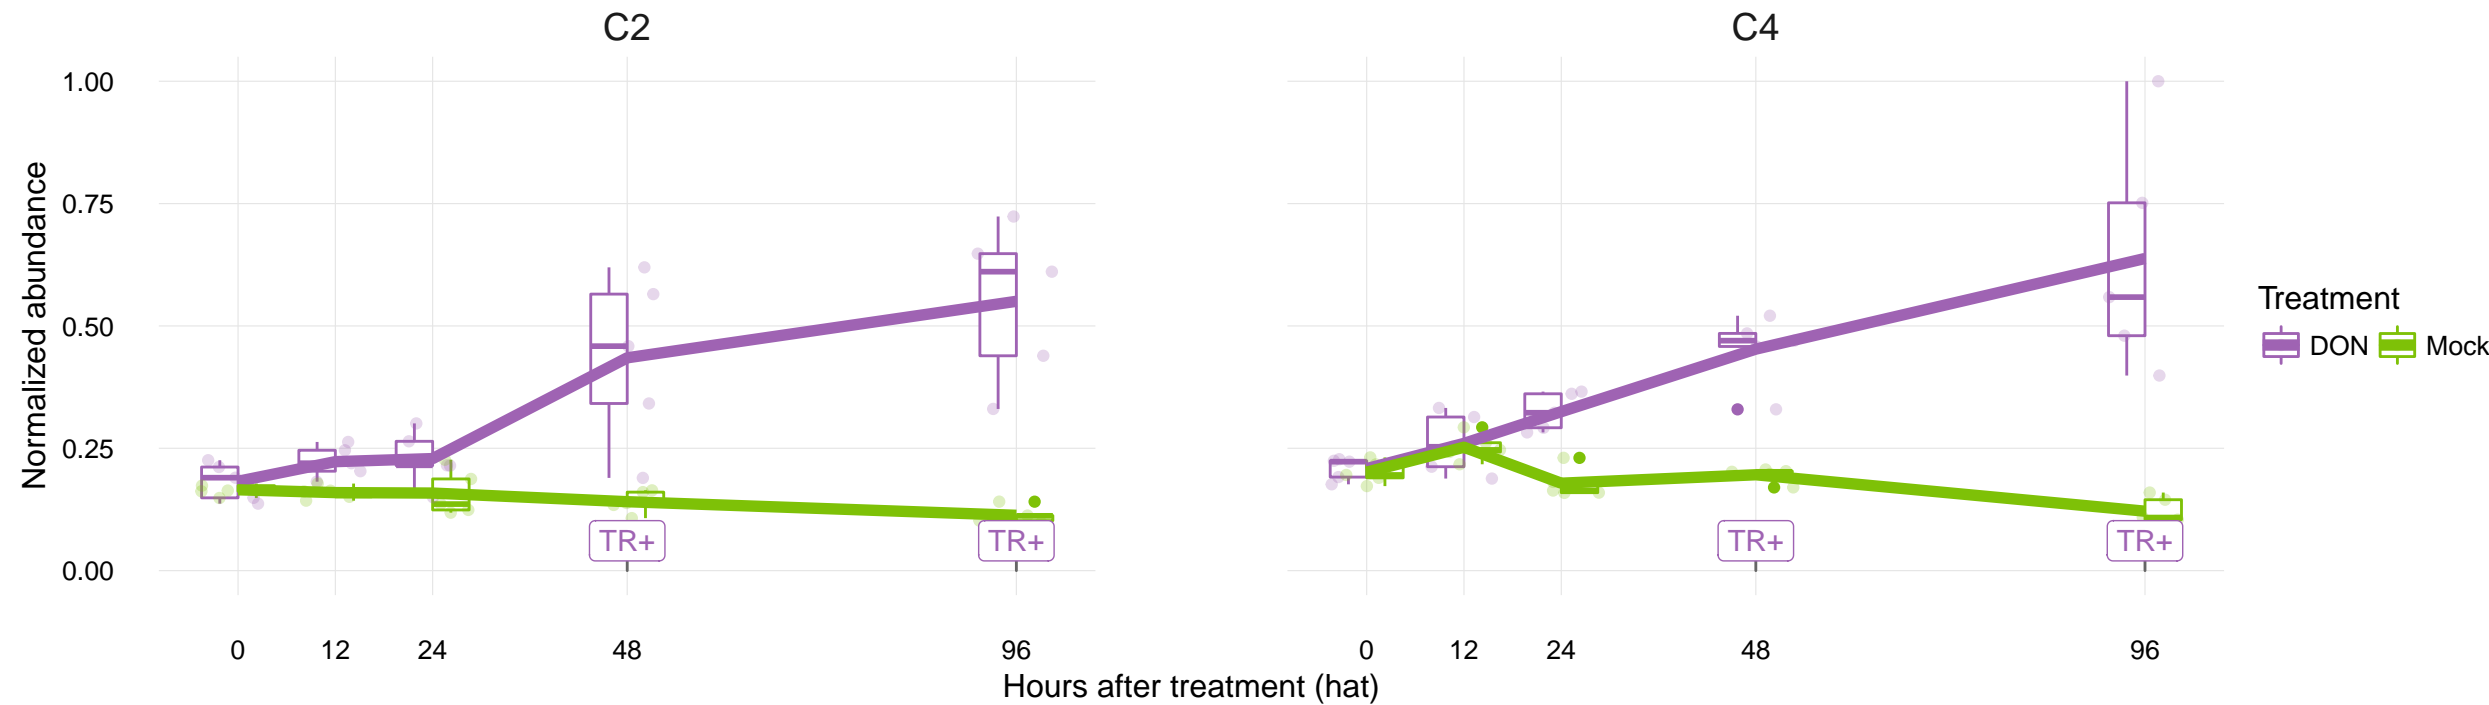

## DON, Mock; different genotypes

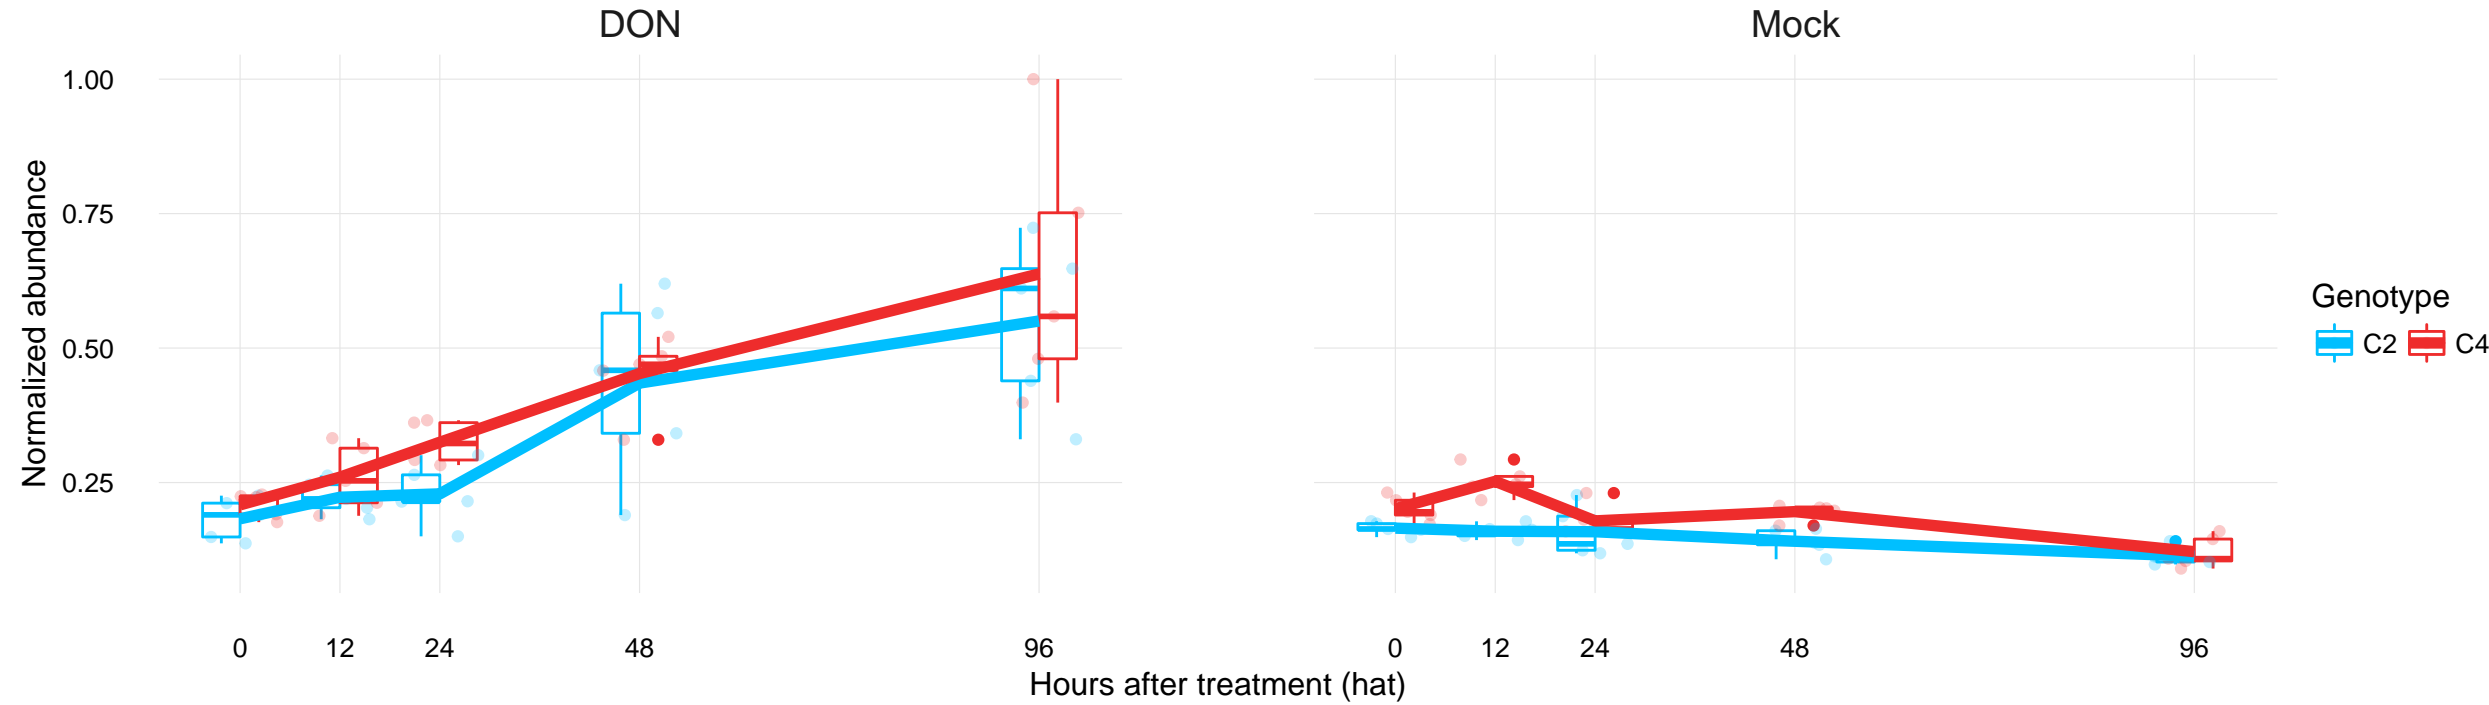

## CM, Remus; different treatments

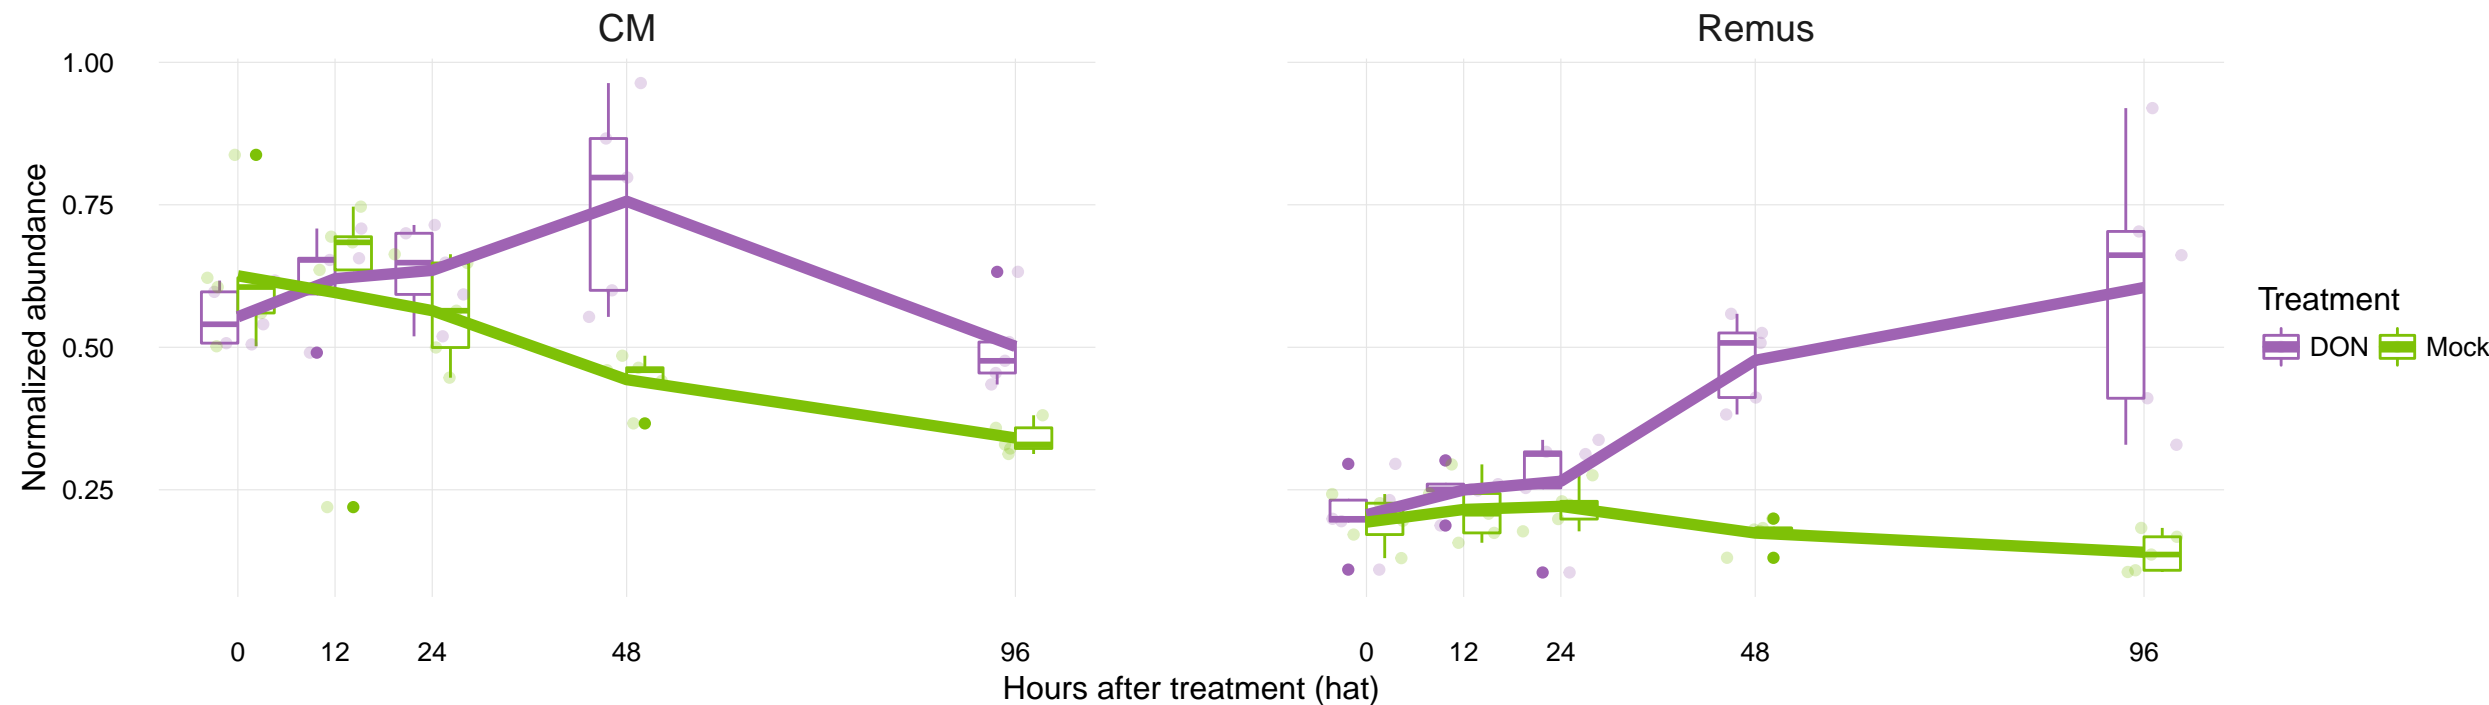

## DON, Mock; all four genotypes

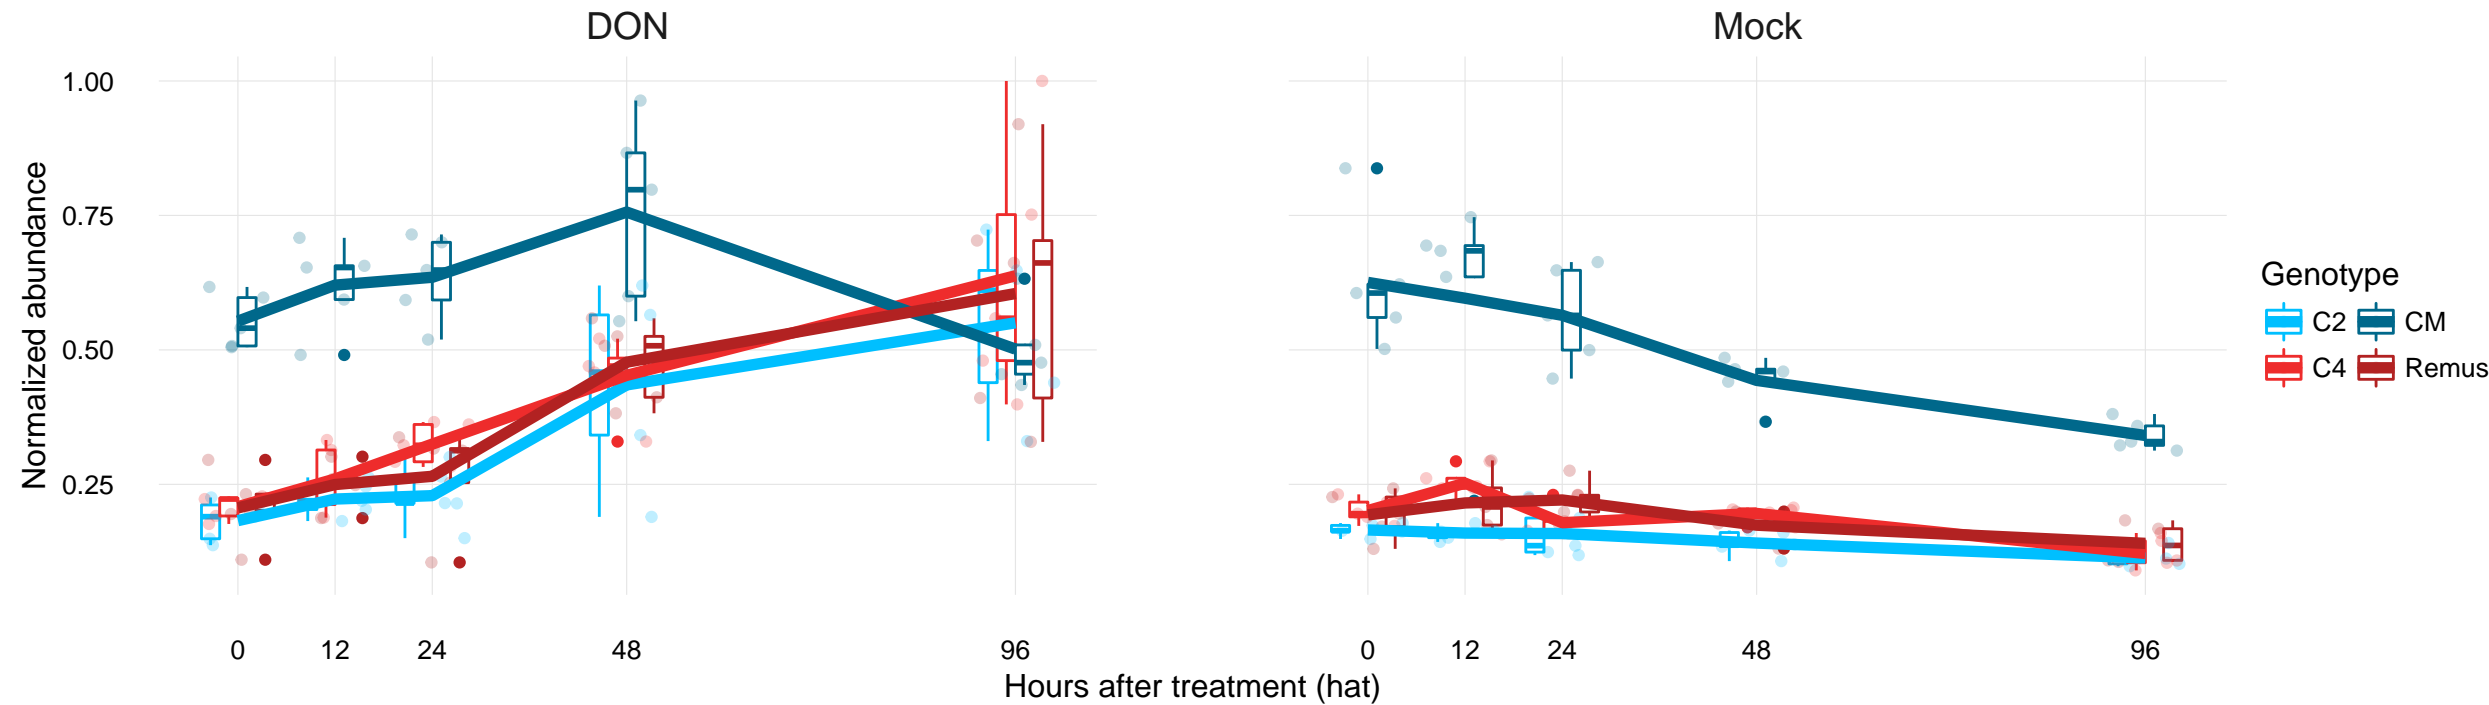

# A.23

Annotated as HCA derivative  
(1 database hit)

|                |                          |
|----------------|--------------------------|
| MZ             | 365.1209                 |
| RT             | 8.71 min                 |
| Normalization  | Directly via KPX samples |
| Cluster        | Cluster 3                |
| Cn total / Phe | 16 /                     |

## C2, C4; different treatments

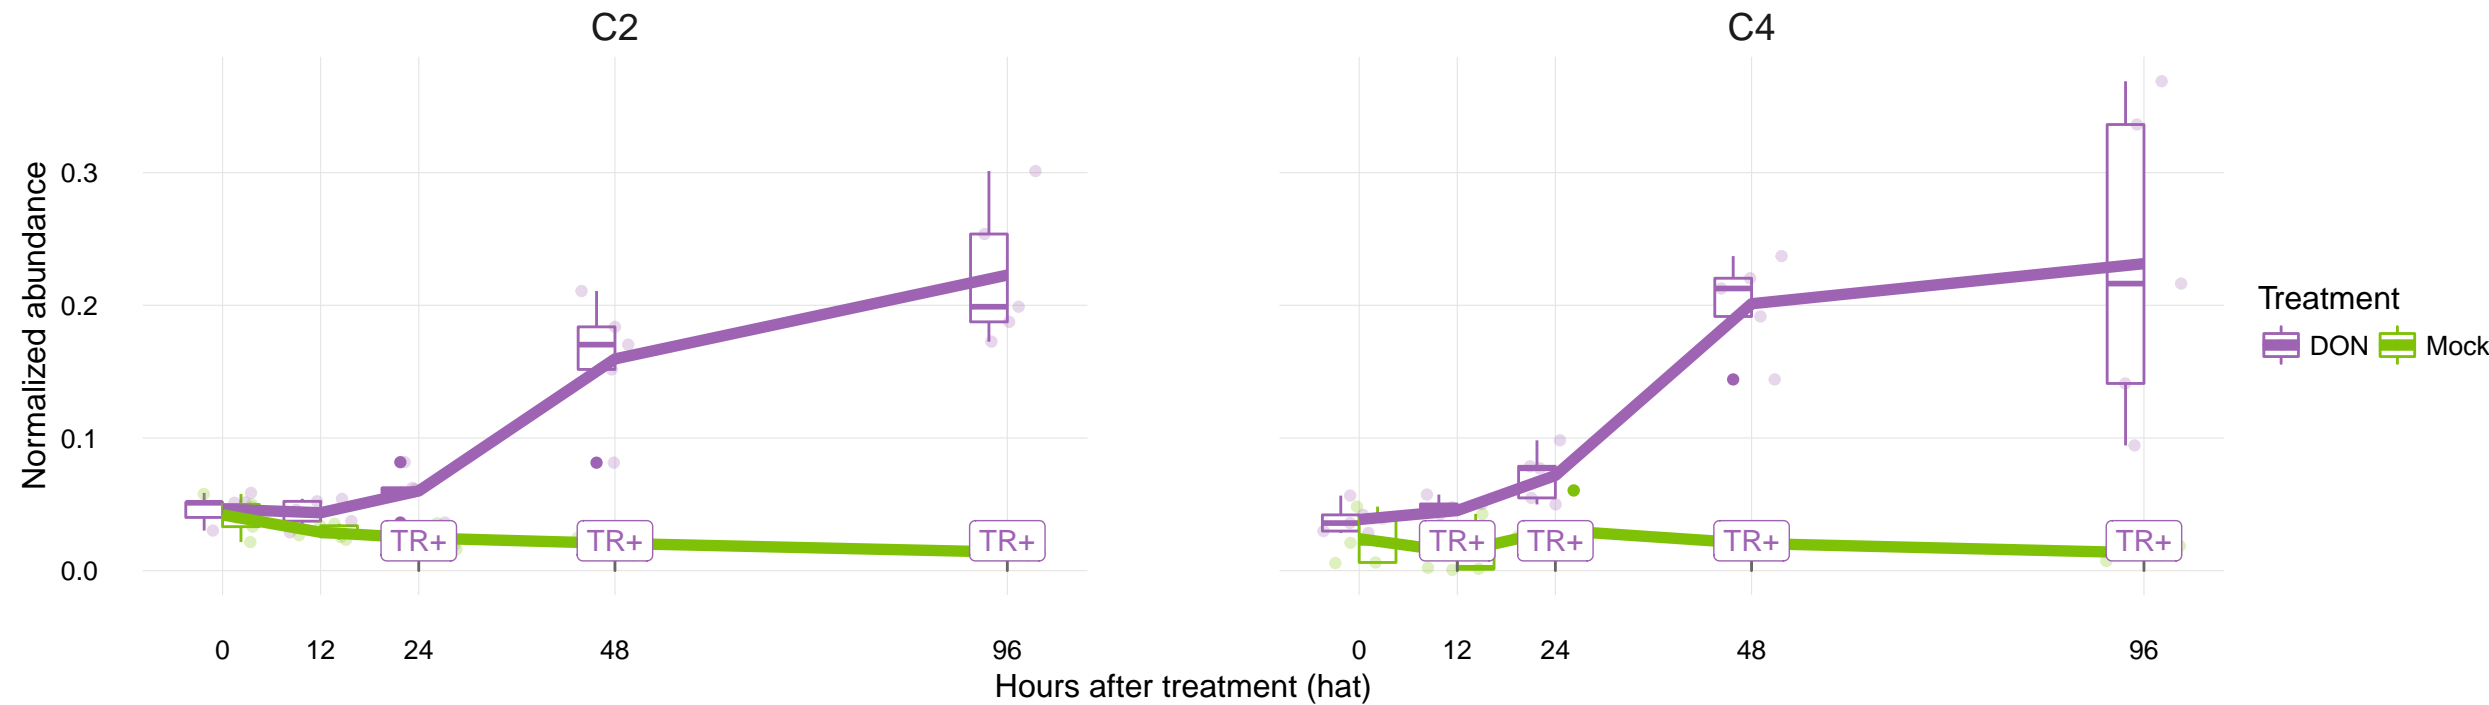

## DON, Mock; different genotypes

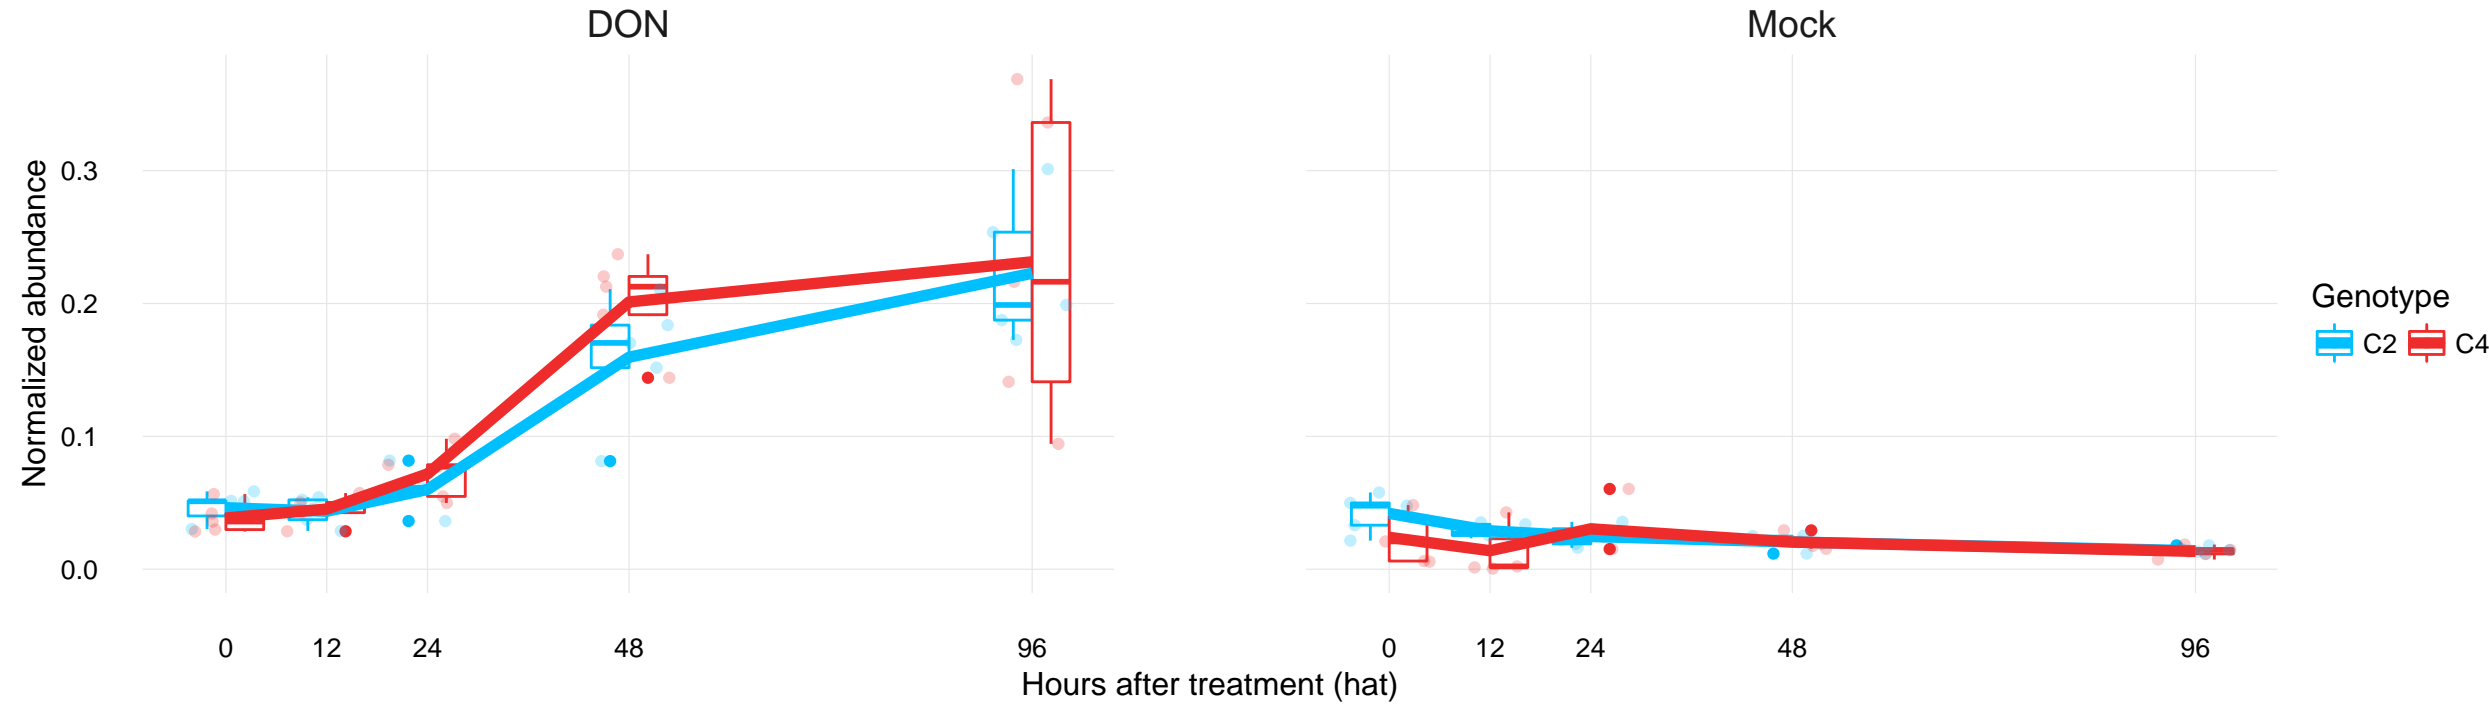

## CM, Remus; different treatments

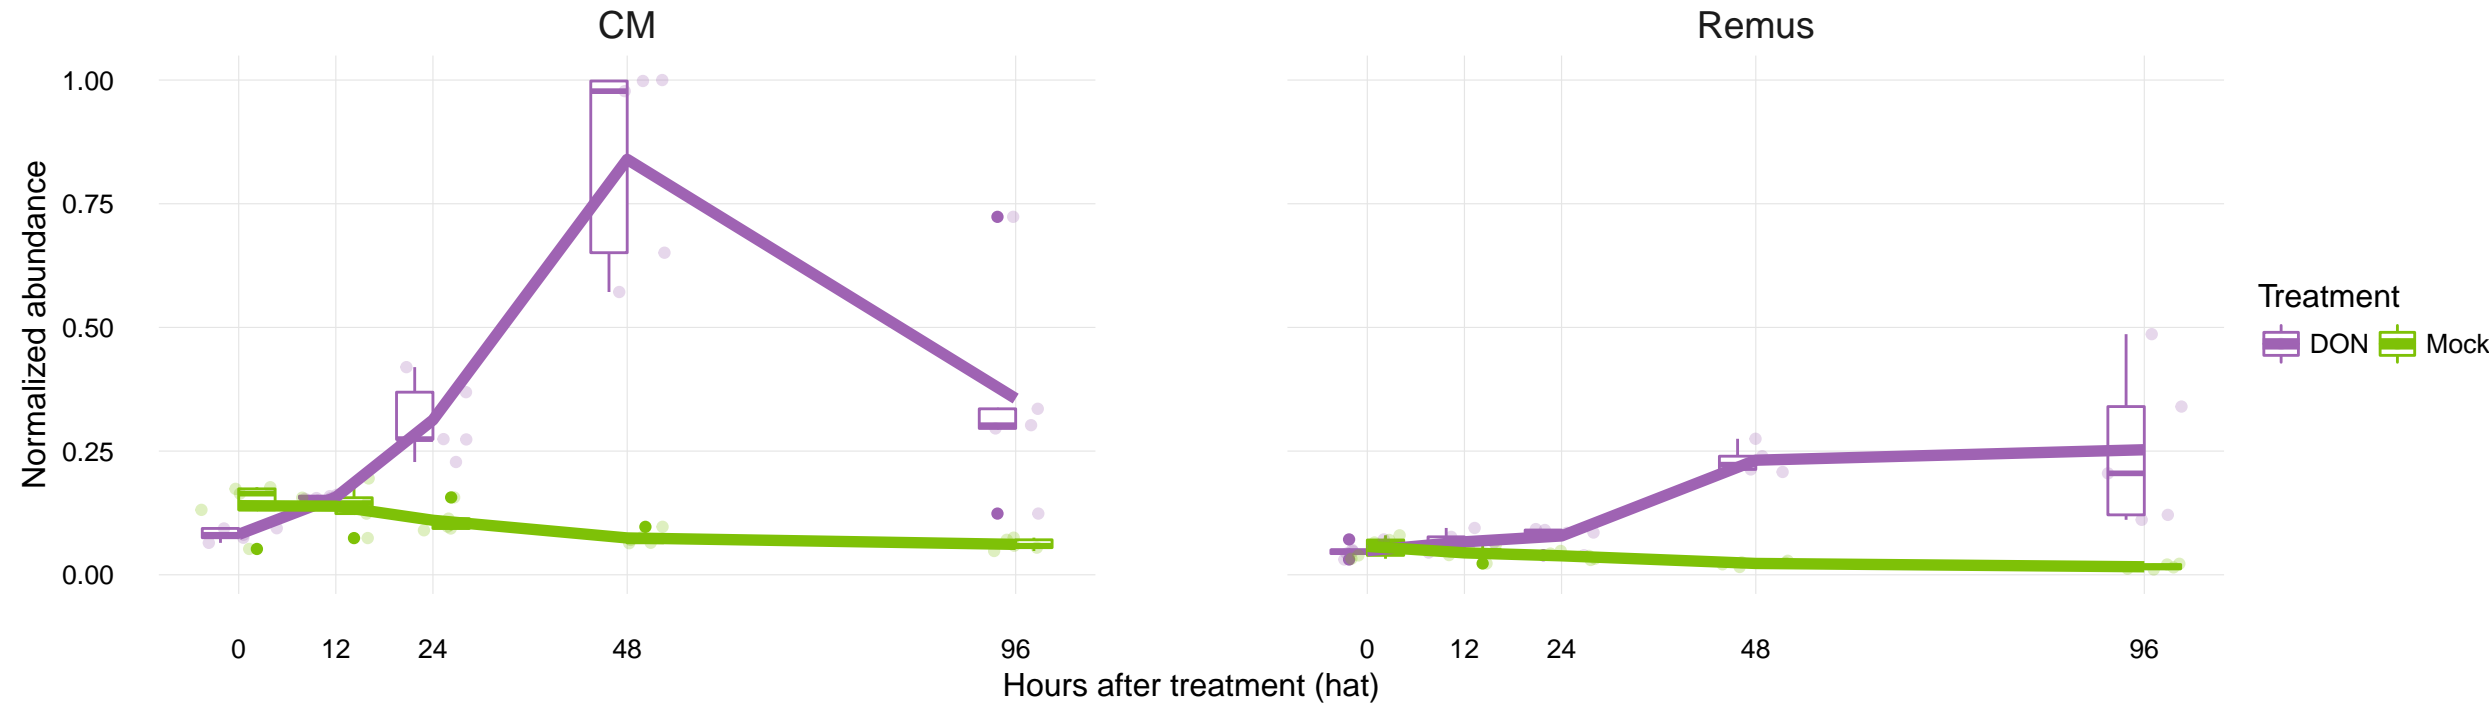

## DON, Mock; all four genotypes

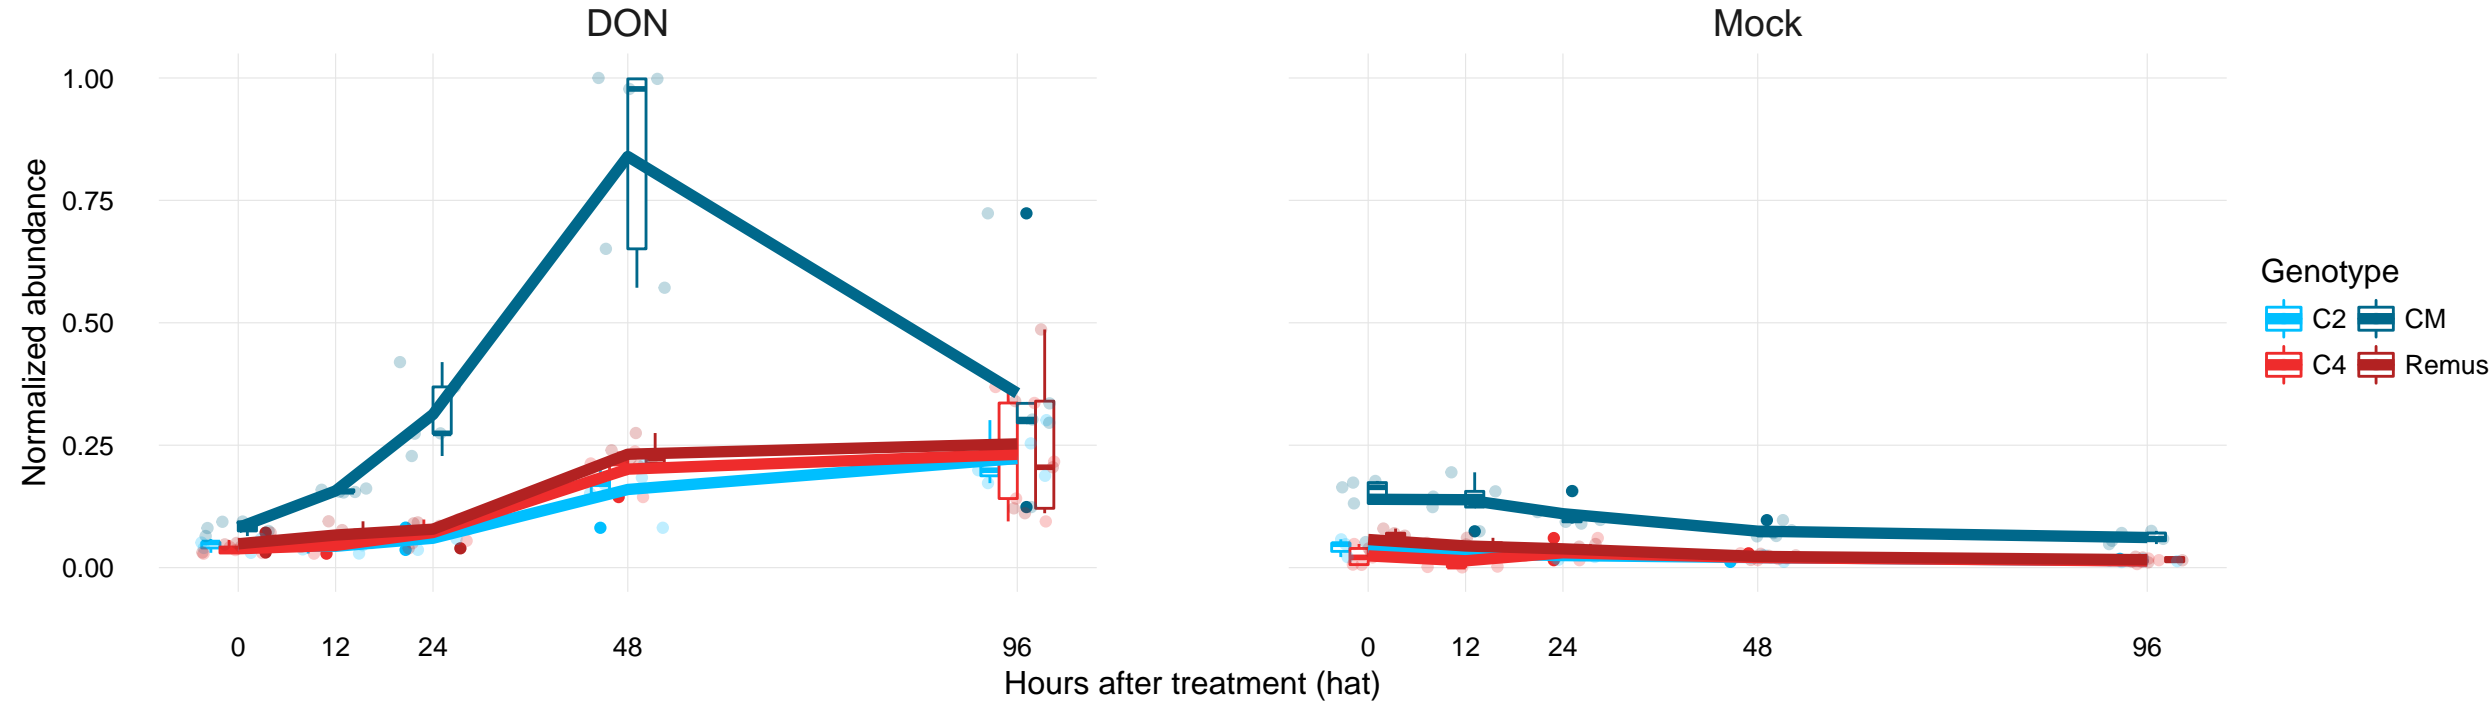

# A.122

Annotated as HCA derivative  
(2 database hits)

|                |                                                |
|----------------|------------------------------------------------|
| MZ             | 838.2766                                       |
| RT             | 19.76 min                                      |
| Normalization  | Indirectly via surrogate<br>in the KPX samples |
| Cluster        | Cluster 3                                      |
| Cn total / Phe | 38 / 9                                         |

## C2, C4; different treatments

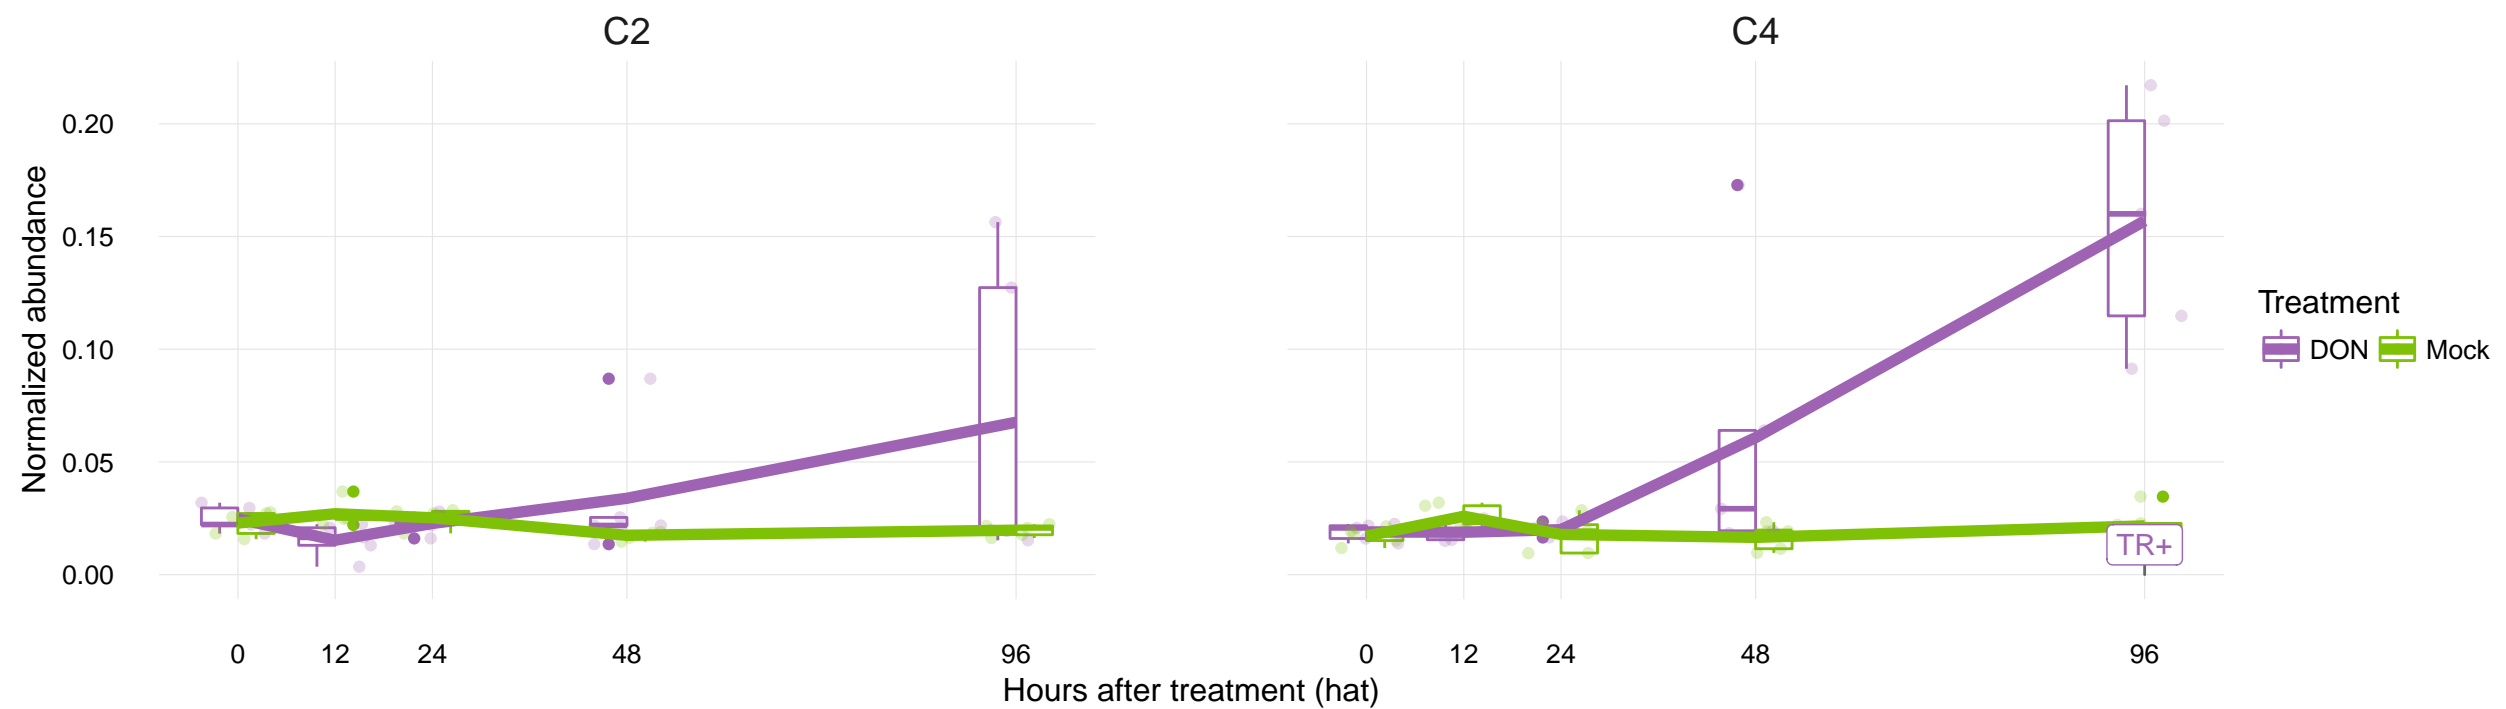

## DON, Mock; different genotypes

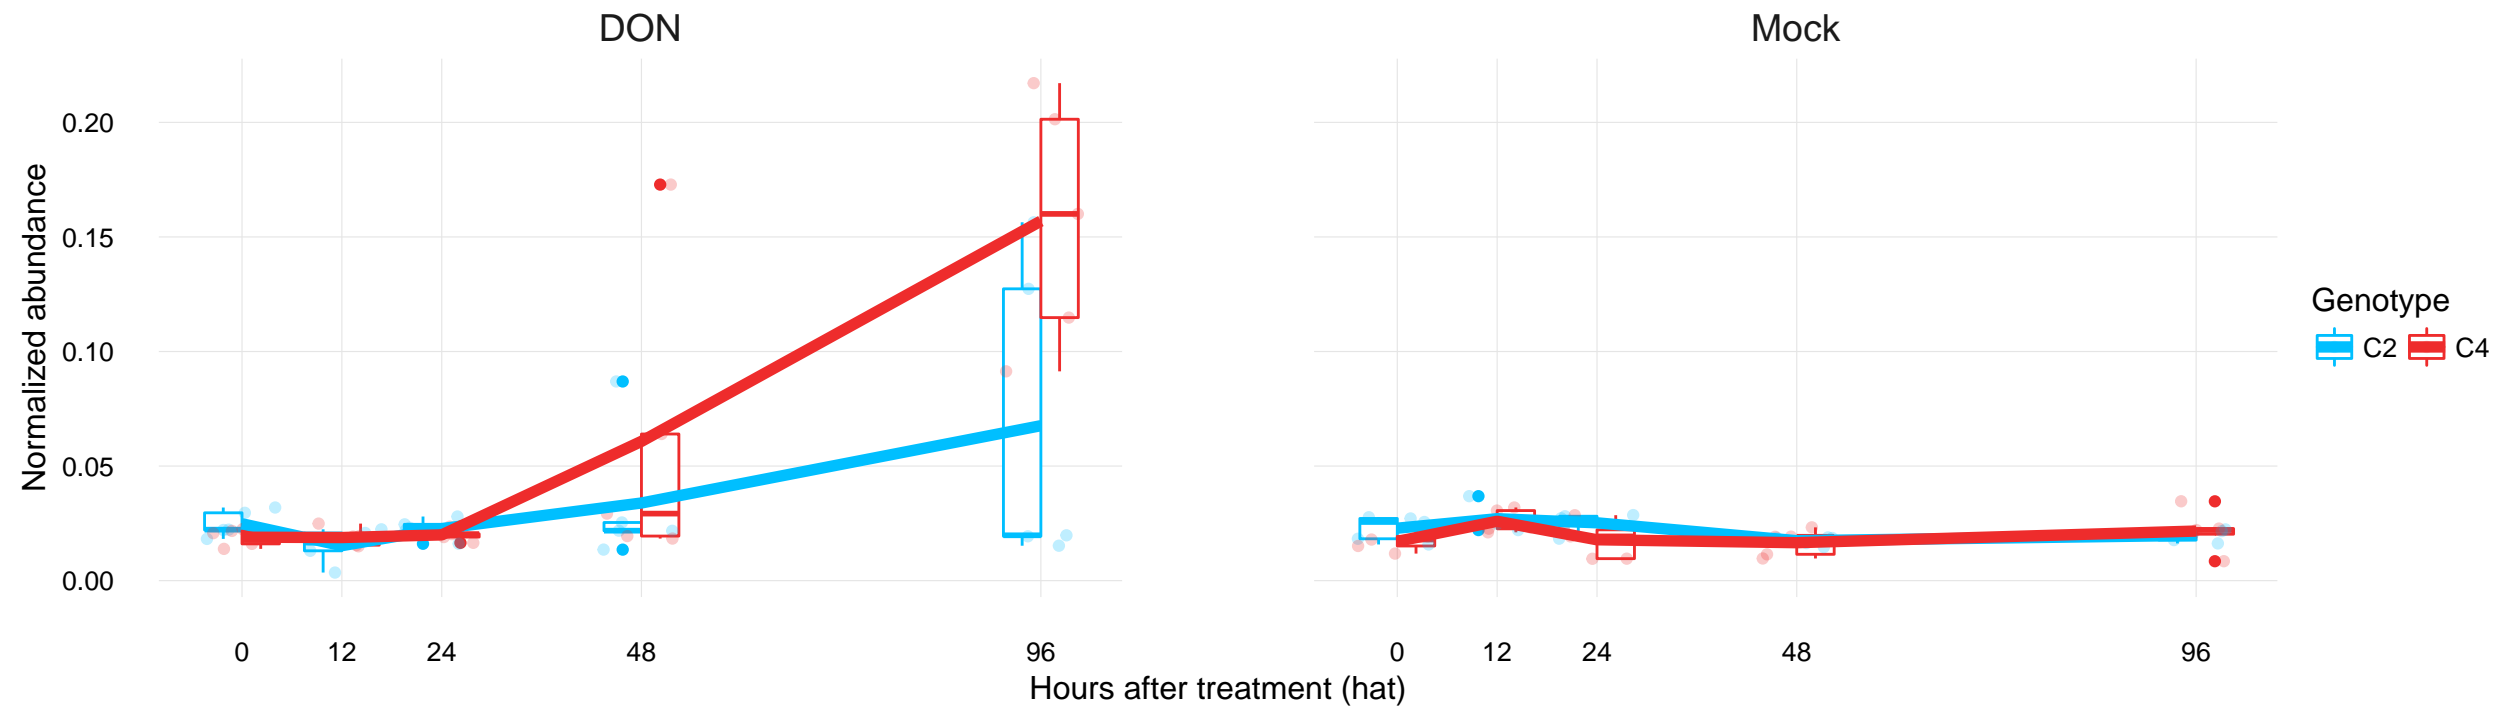

## CM, Remus; different treatments

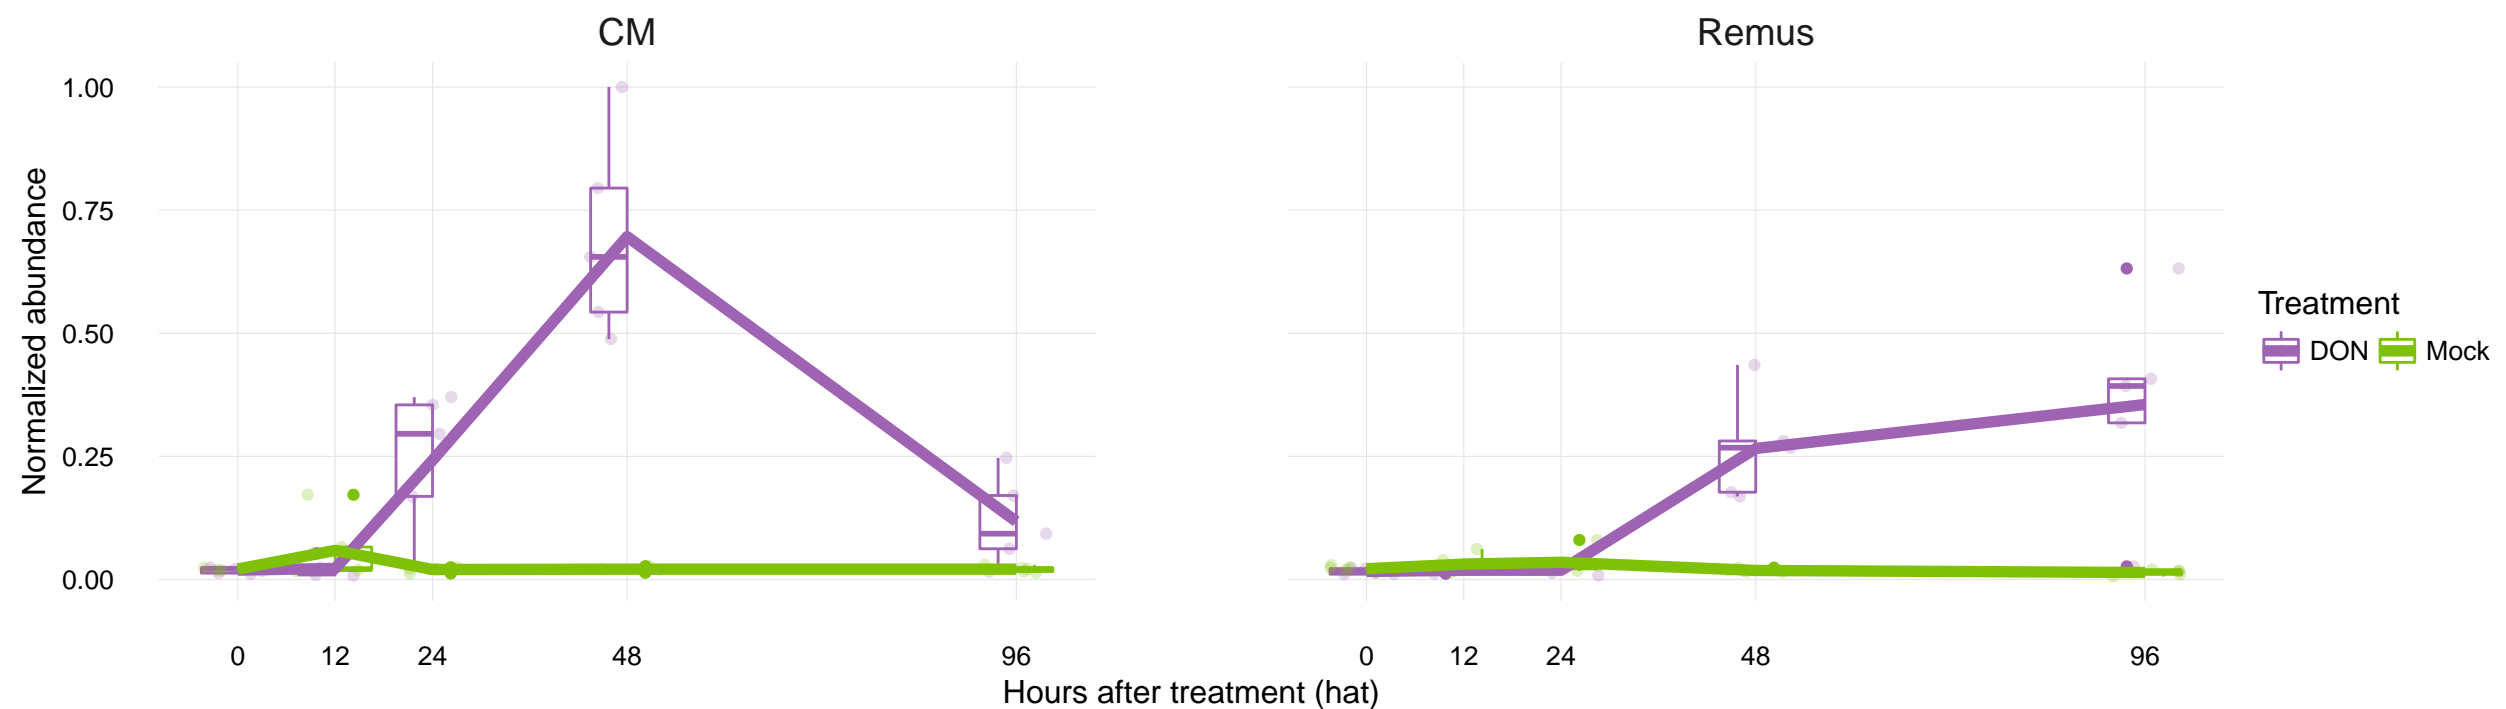

## DON, Mock; all four genotypes

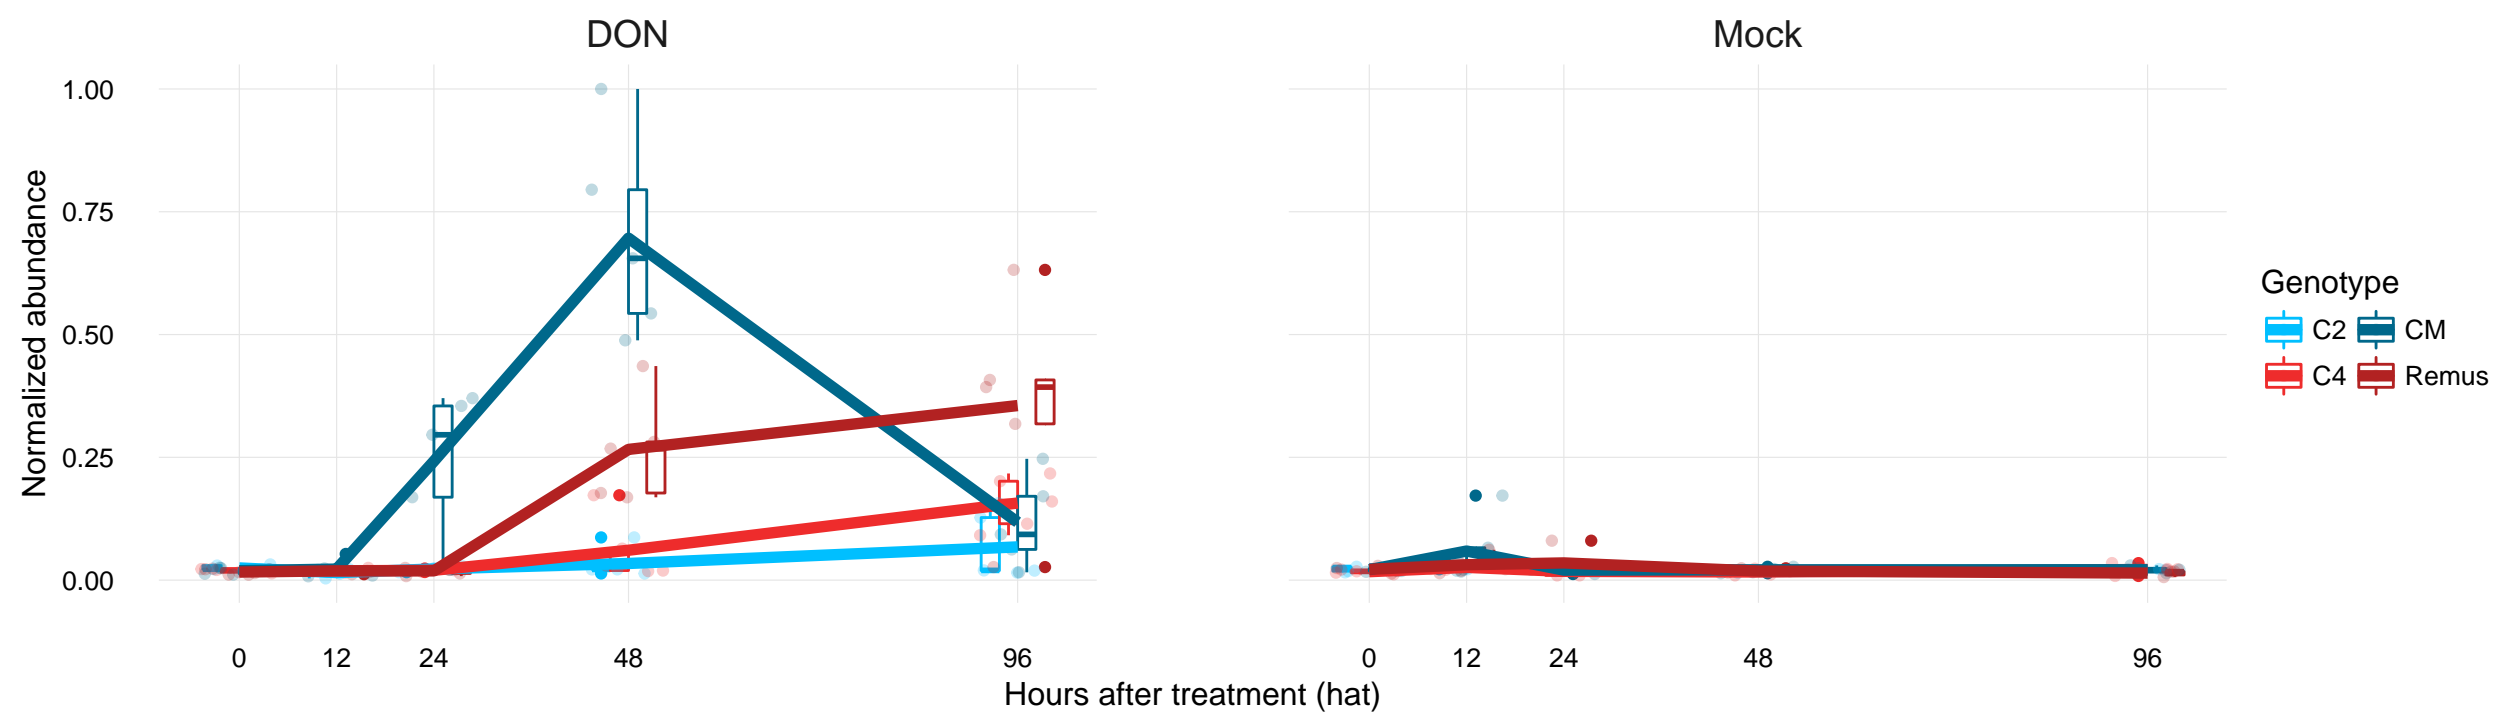

# A.49

Annotated as HCA derivative  
(1 database hit)

|                |                                                |
|----------------|------------------------------------------------|
| MZ             | 339.1076                                       |
| RT             | 11.79 min                                      |
| Normalization  | Indirectly via surrogate<br>in the KPX samples |
| Cluster        | Cluster 3                                      |
| Cn total / Phe | 16 /                                           |

## C2, C4; different treatments

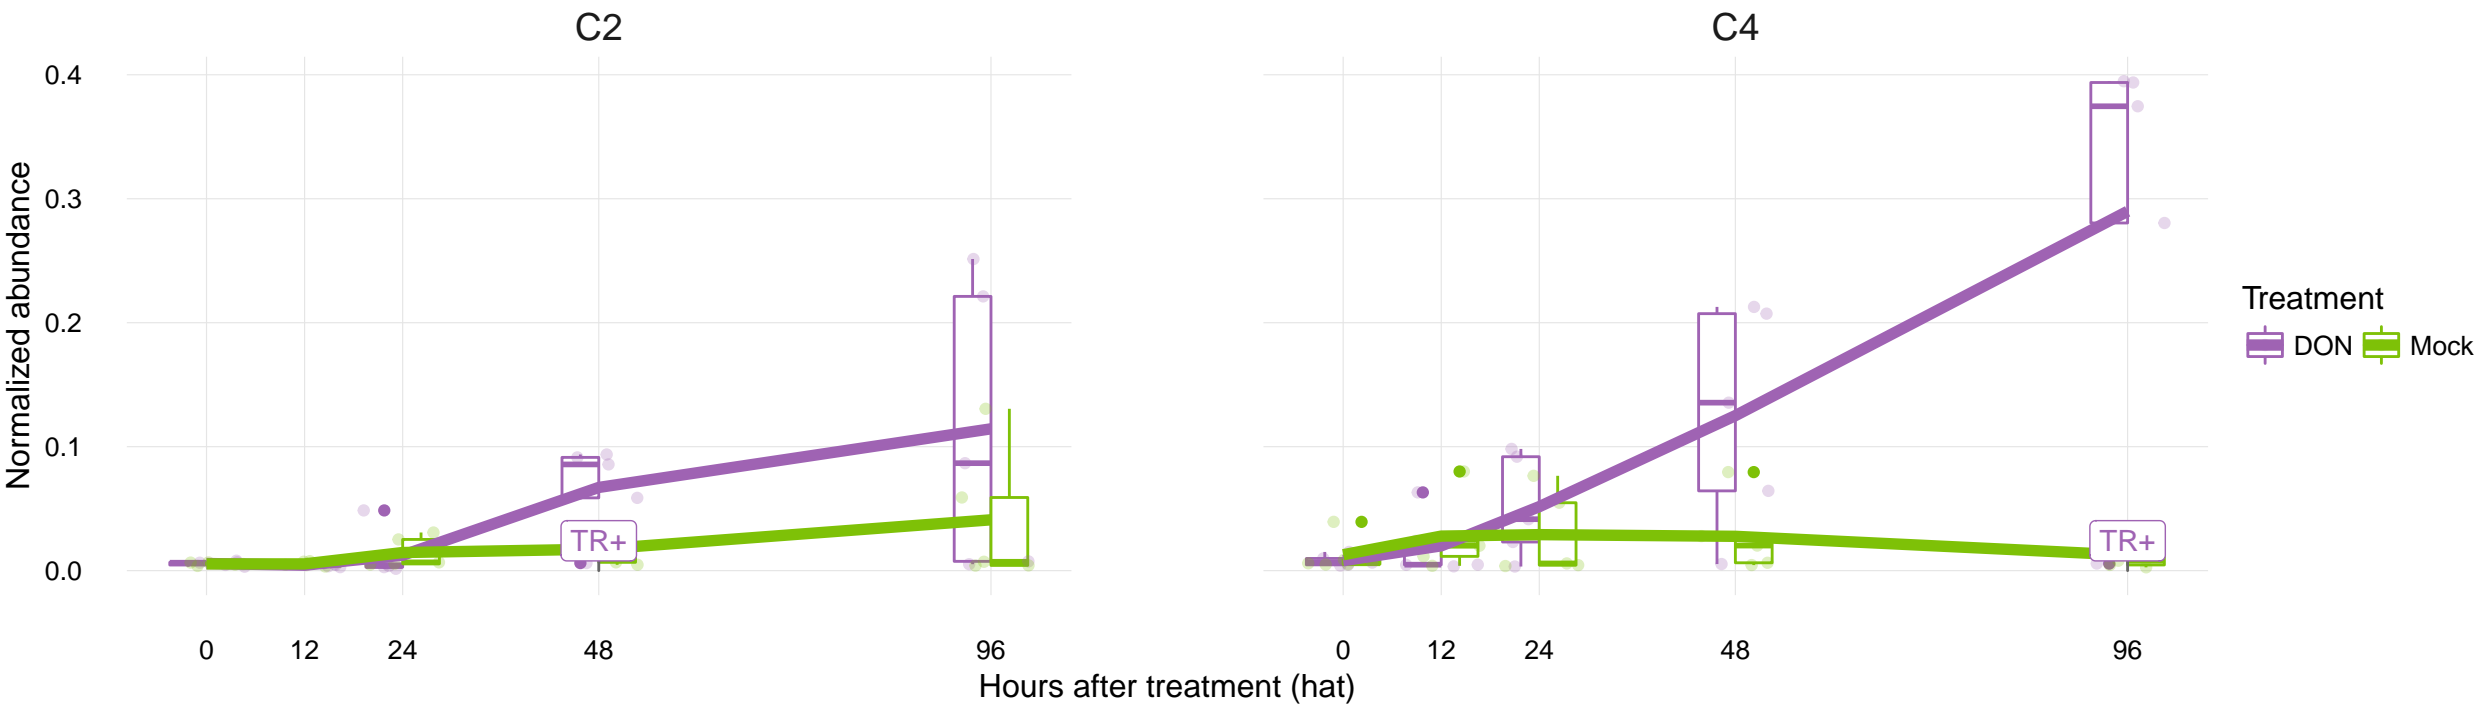

## DON, Mock; different genotypes

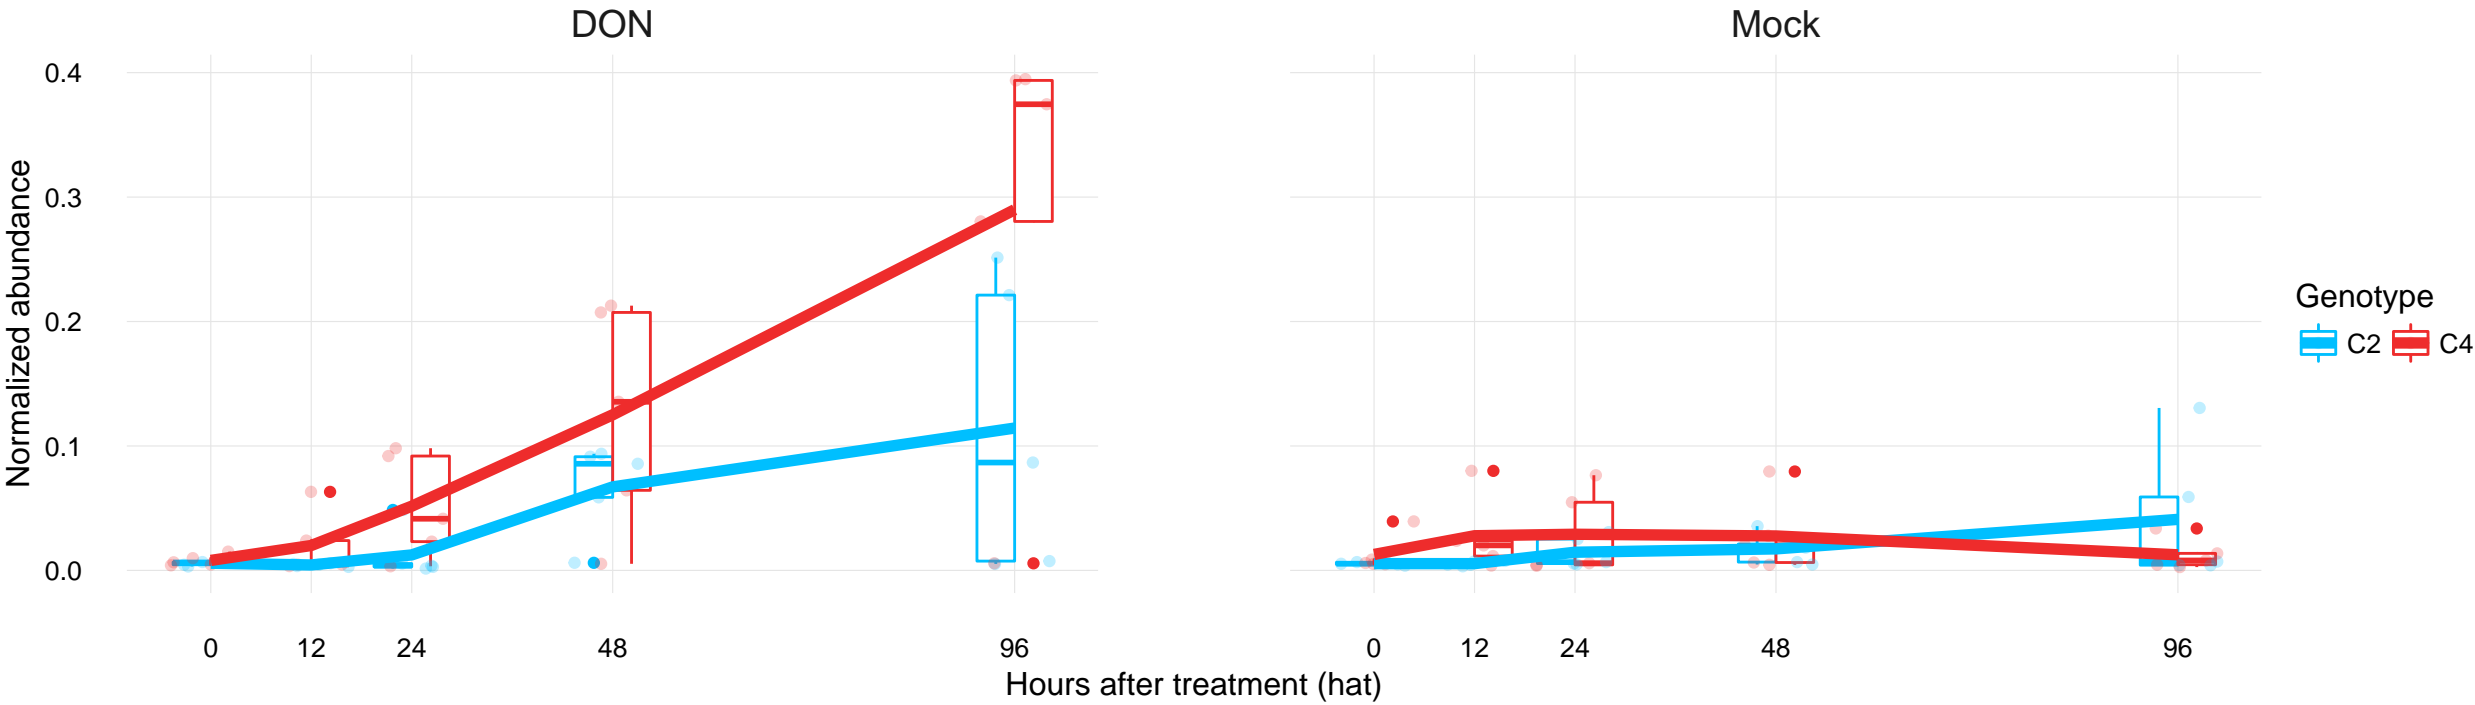

## CM, Remus; different treatments

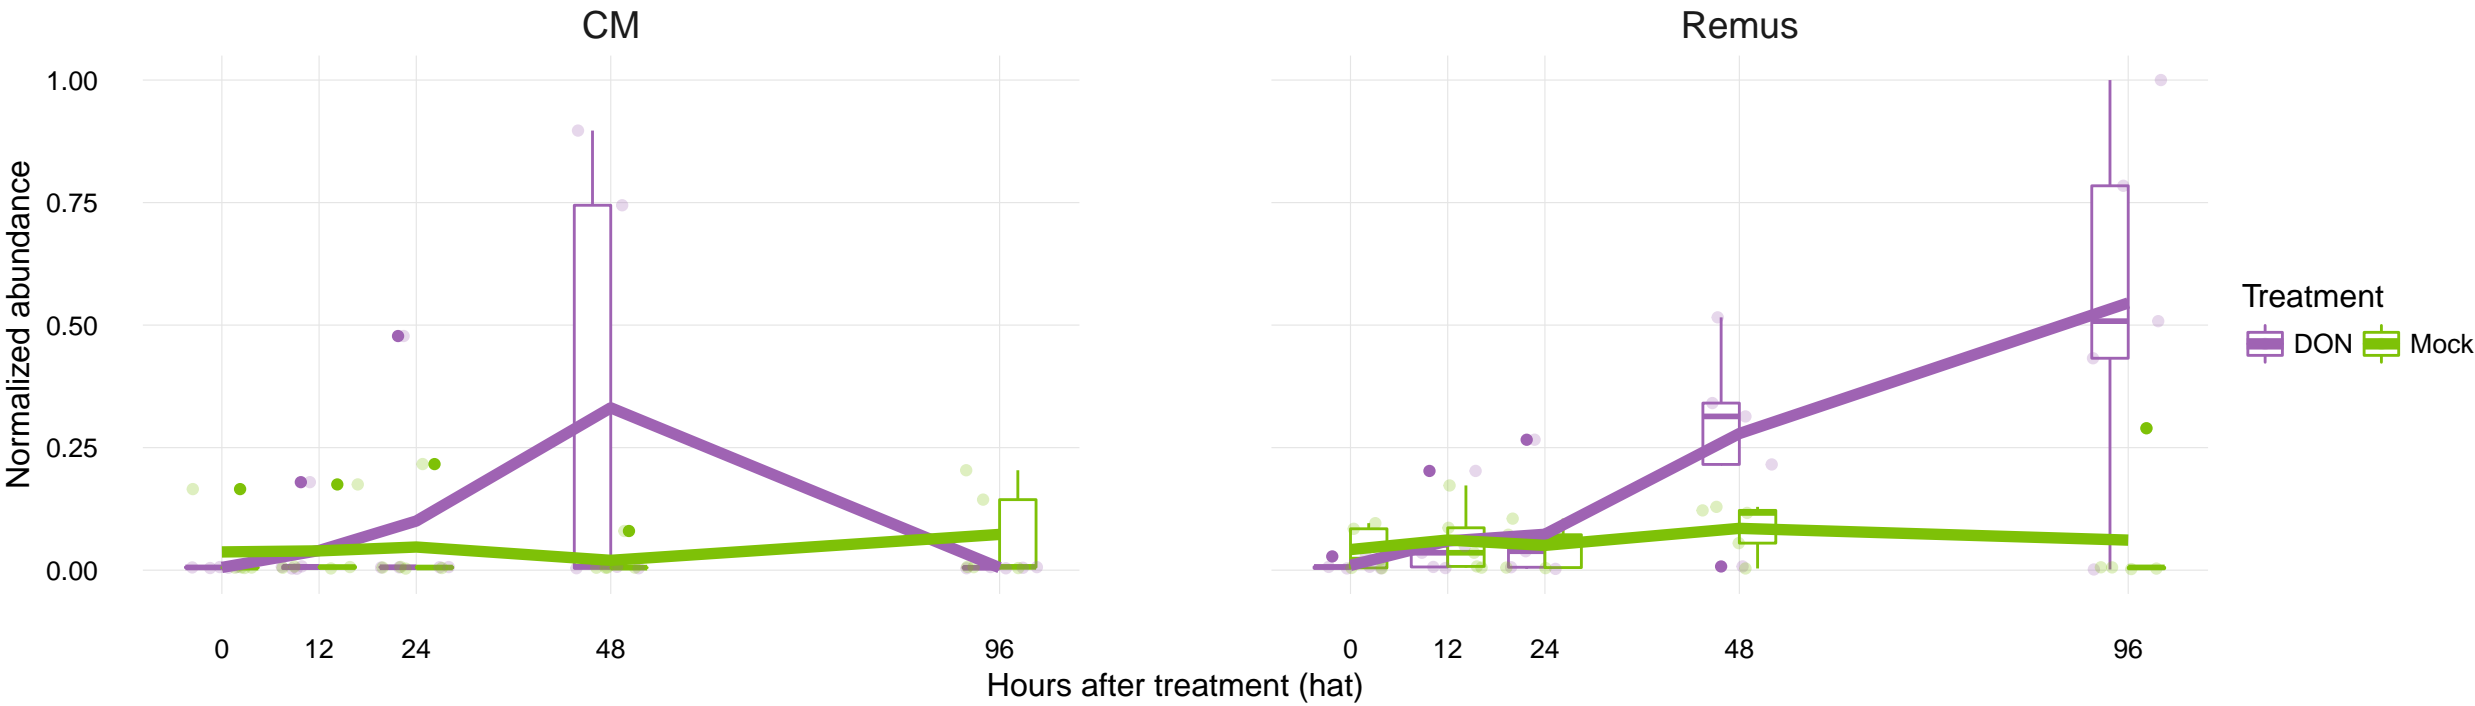

## DON, Mock; all four genotypes

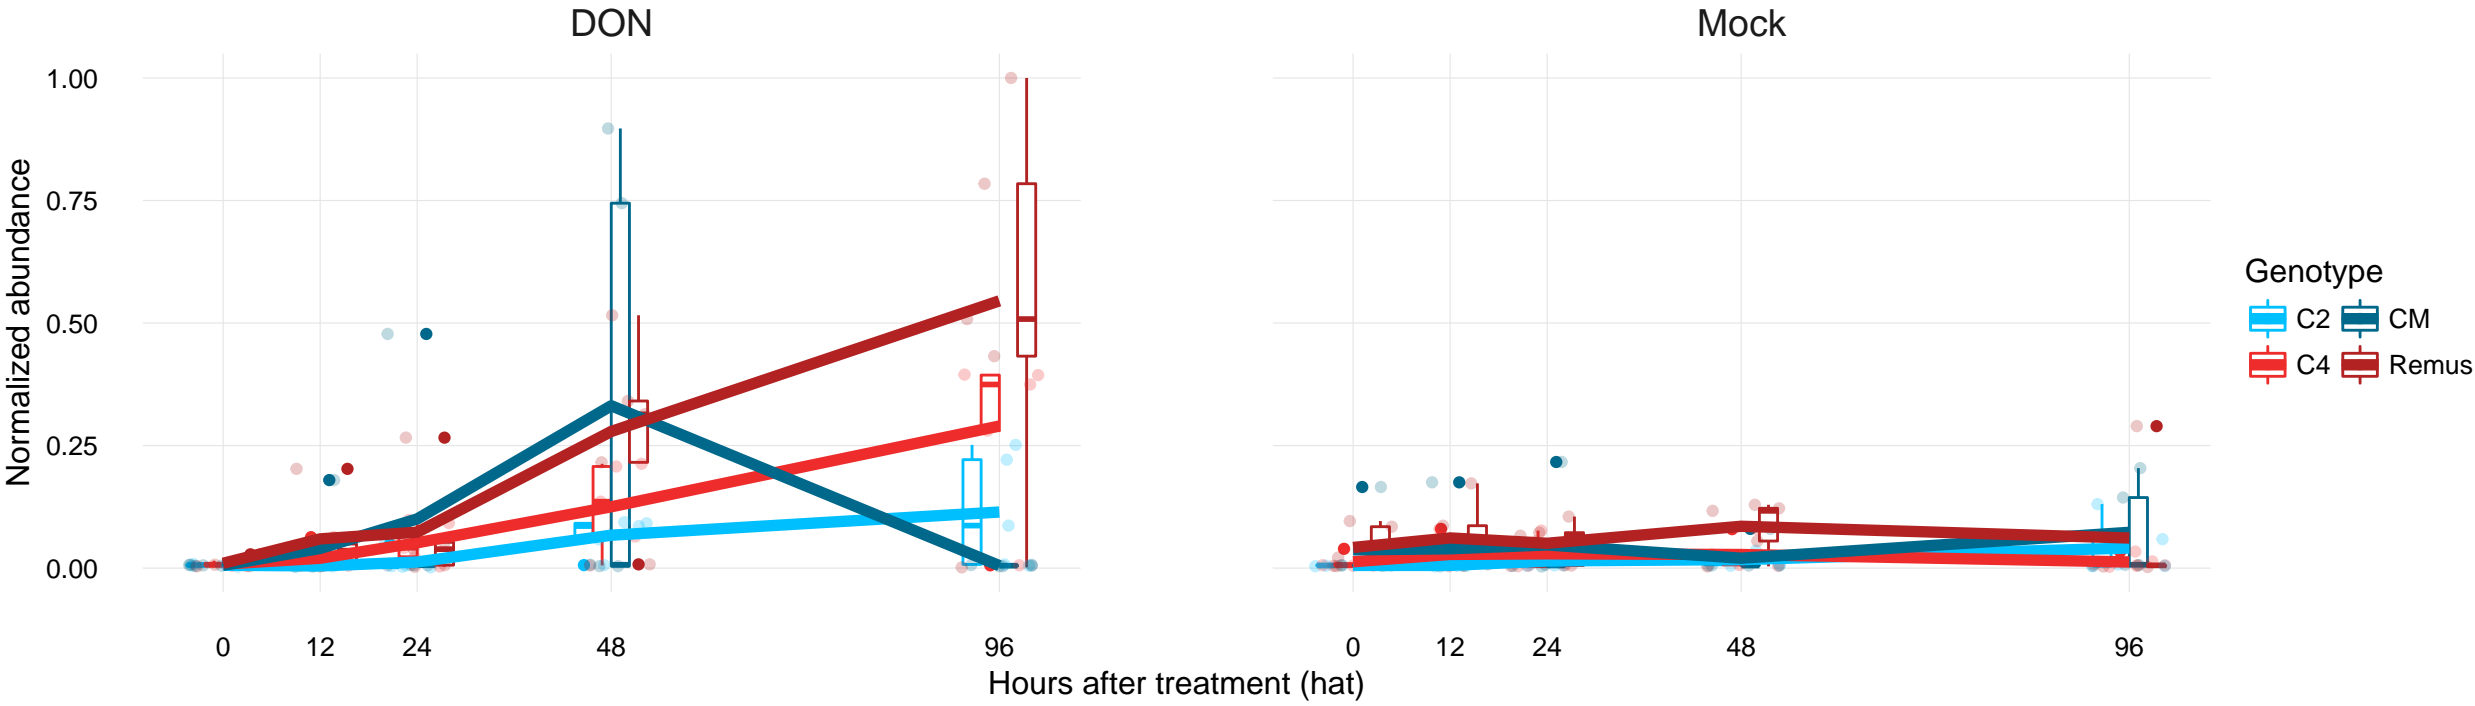

# U.7

Unknown Phe-derived wheat-metabolite

|                |                          |
|----------------|--------------------------|
| MZ             | 193.086                  |
| RT             | 12.96 min                |
| Normalization  | Directly via KPX samples |
| Cluster        | Cluster 3                |
| Cn total / Phe | 11 / 8                   |

C2, C4; different treatments

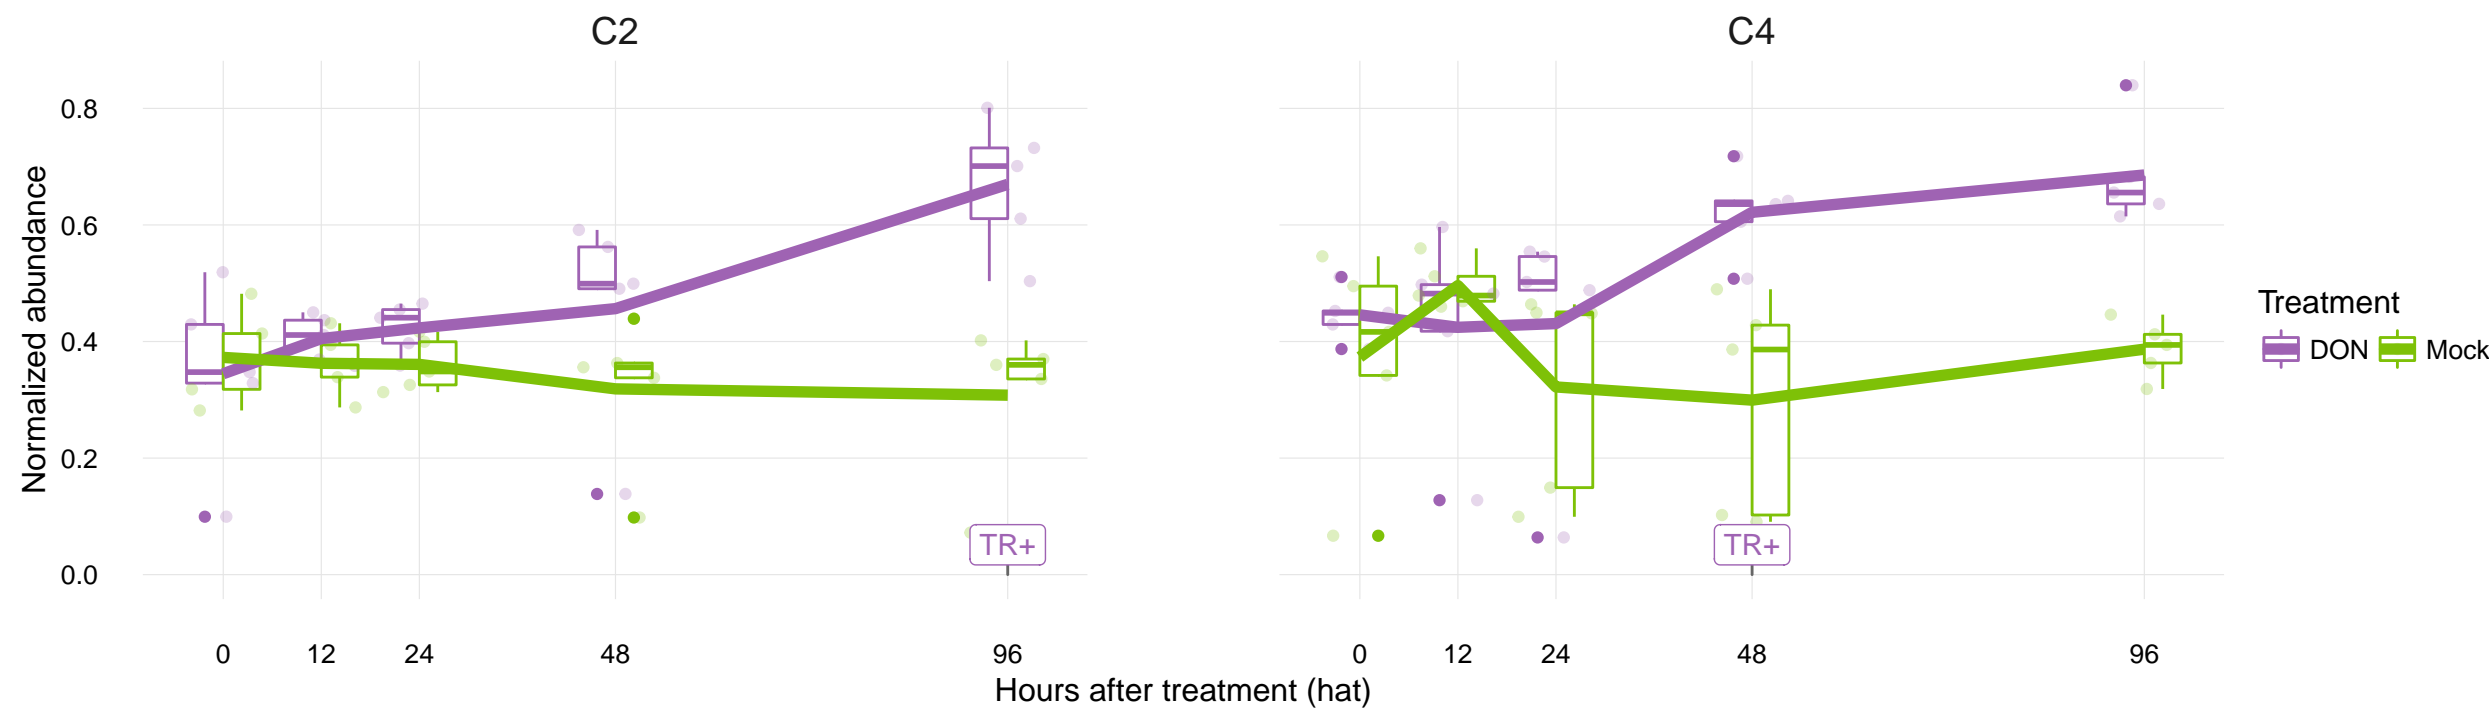

DON, Mock; different genotypes

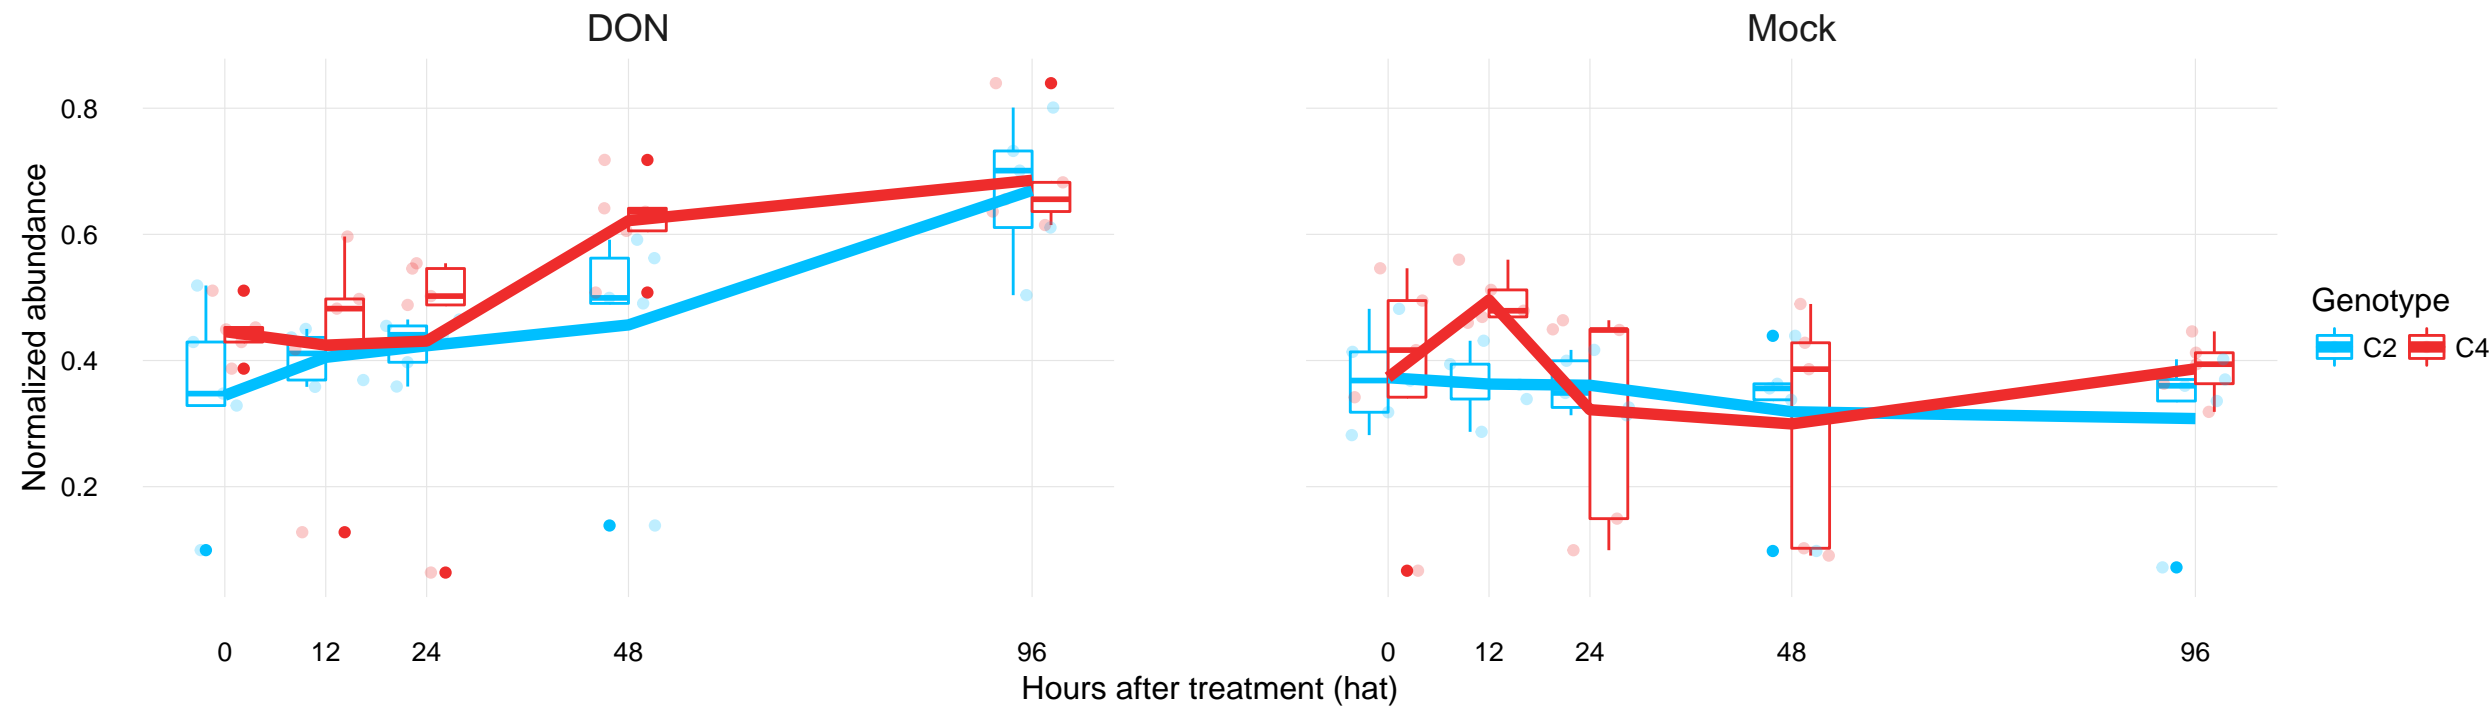

CM, Remus; different treatments

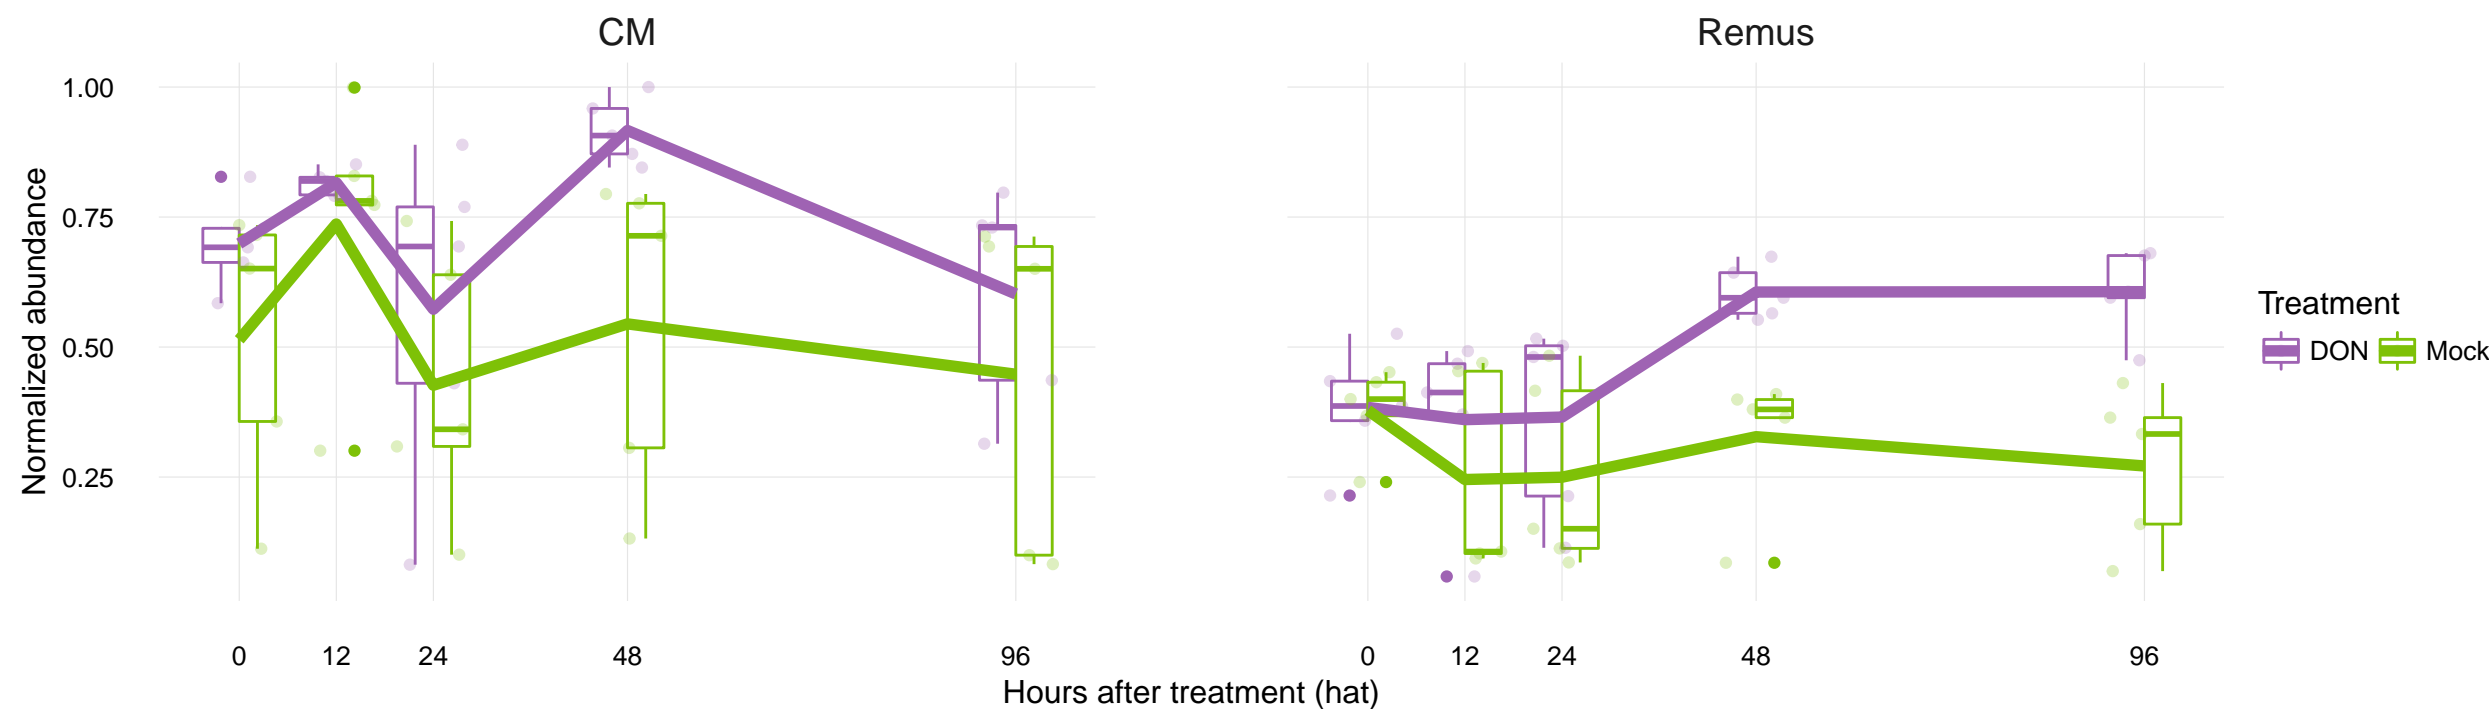

DON, Mock; all four genotypes

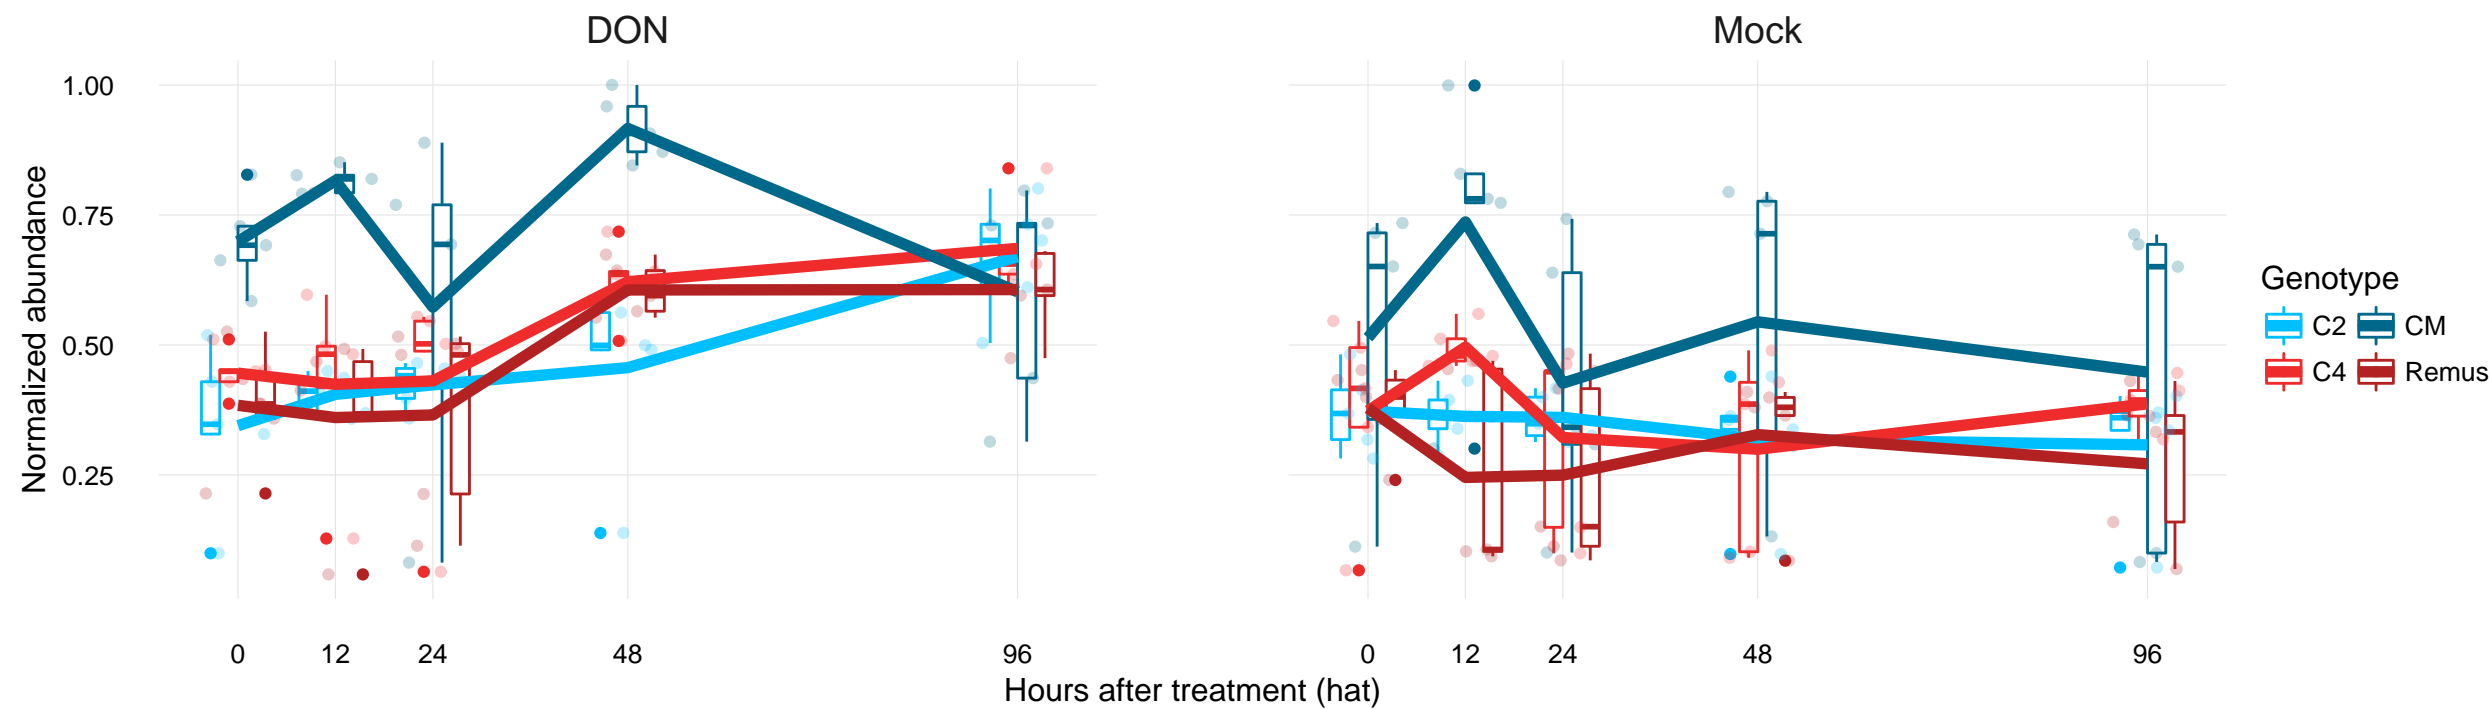

# A.46

Annotated as Putative phenylacetic acid derivative  
(1 database hit)

|                |                          |
|----------------|--------------------------|
| MZ             | 409.1107                 |
| RT             | 11.61 min                |
| Normalization  | Directly via KPX samples |
| Cluster        | Cluster 3                |
| Cn total / Phe | 17 /                     |

## C2, C4; different treatments

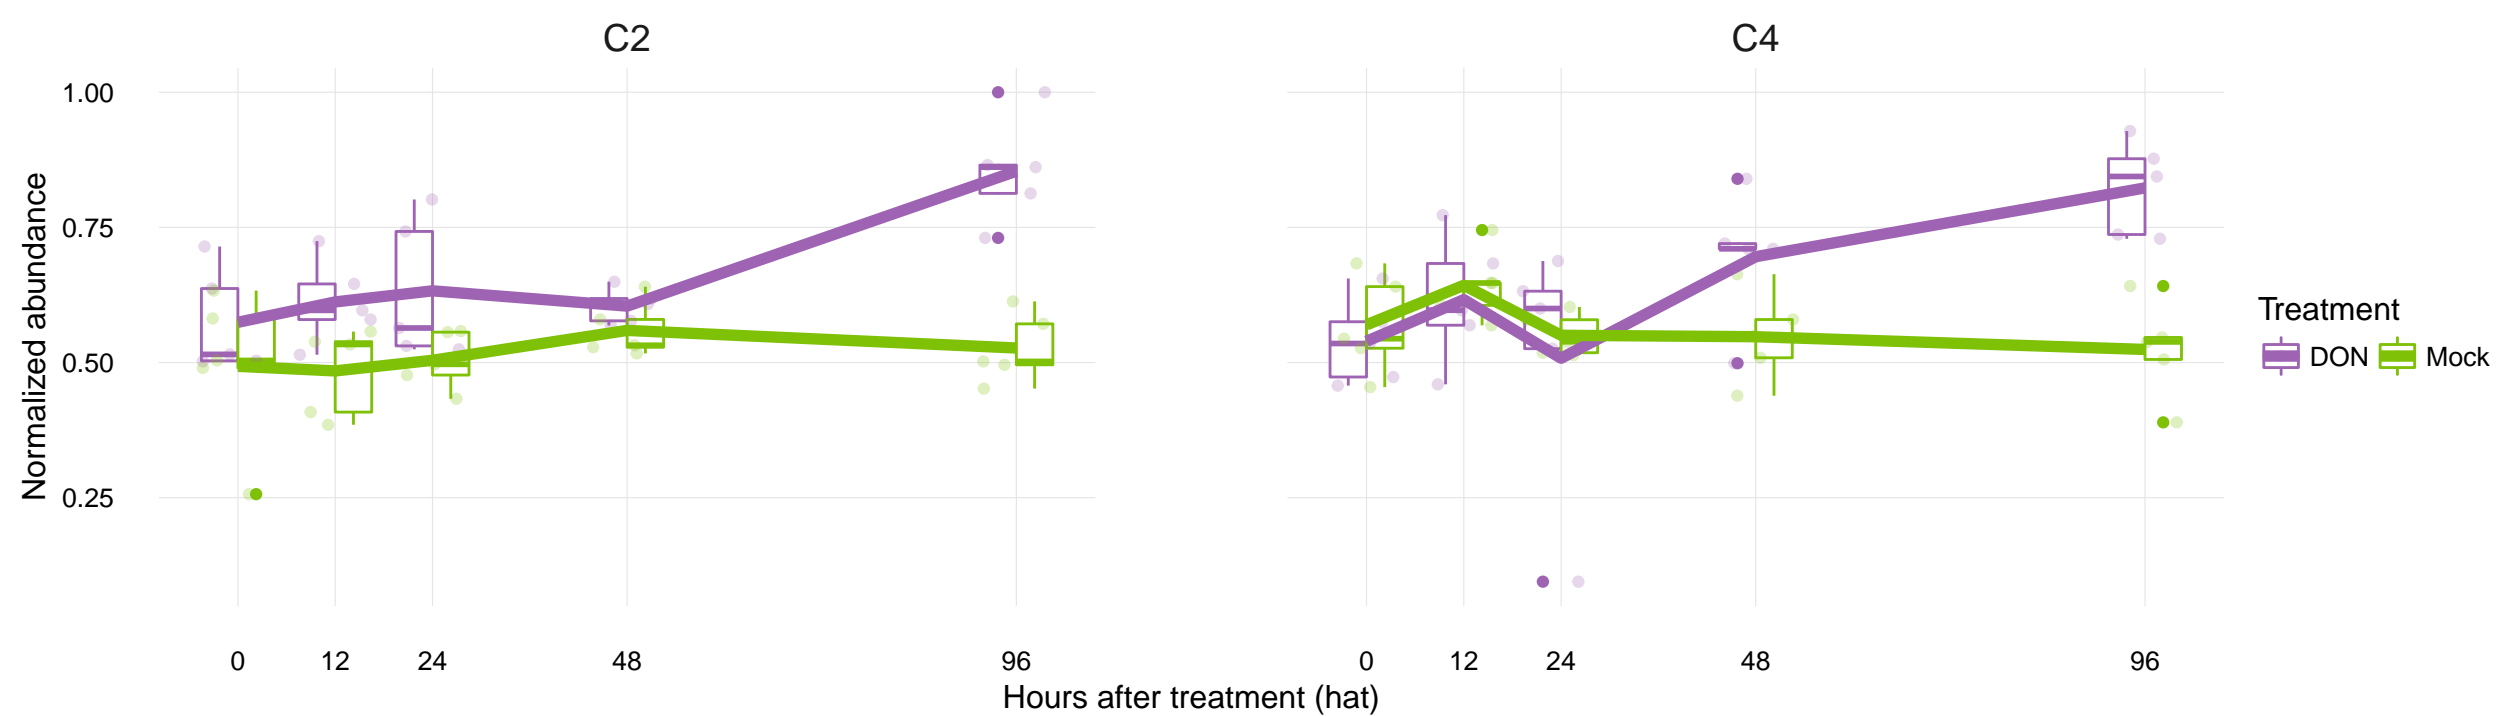

## DON, Mock; different genotypes

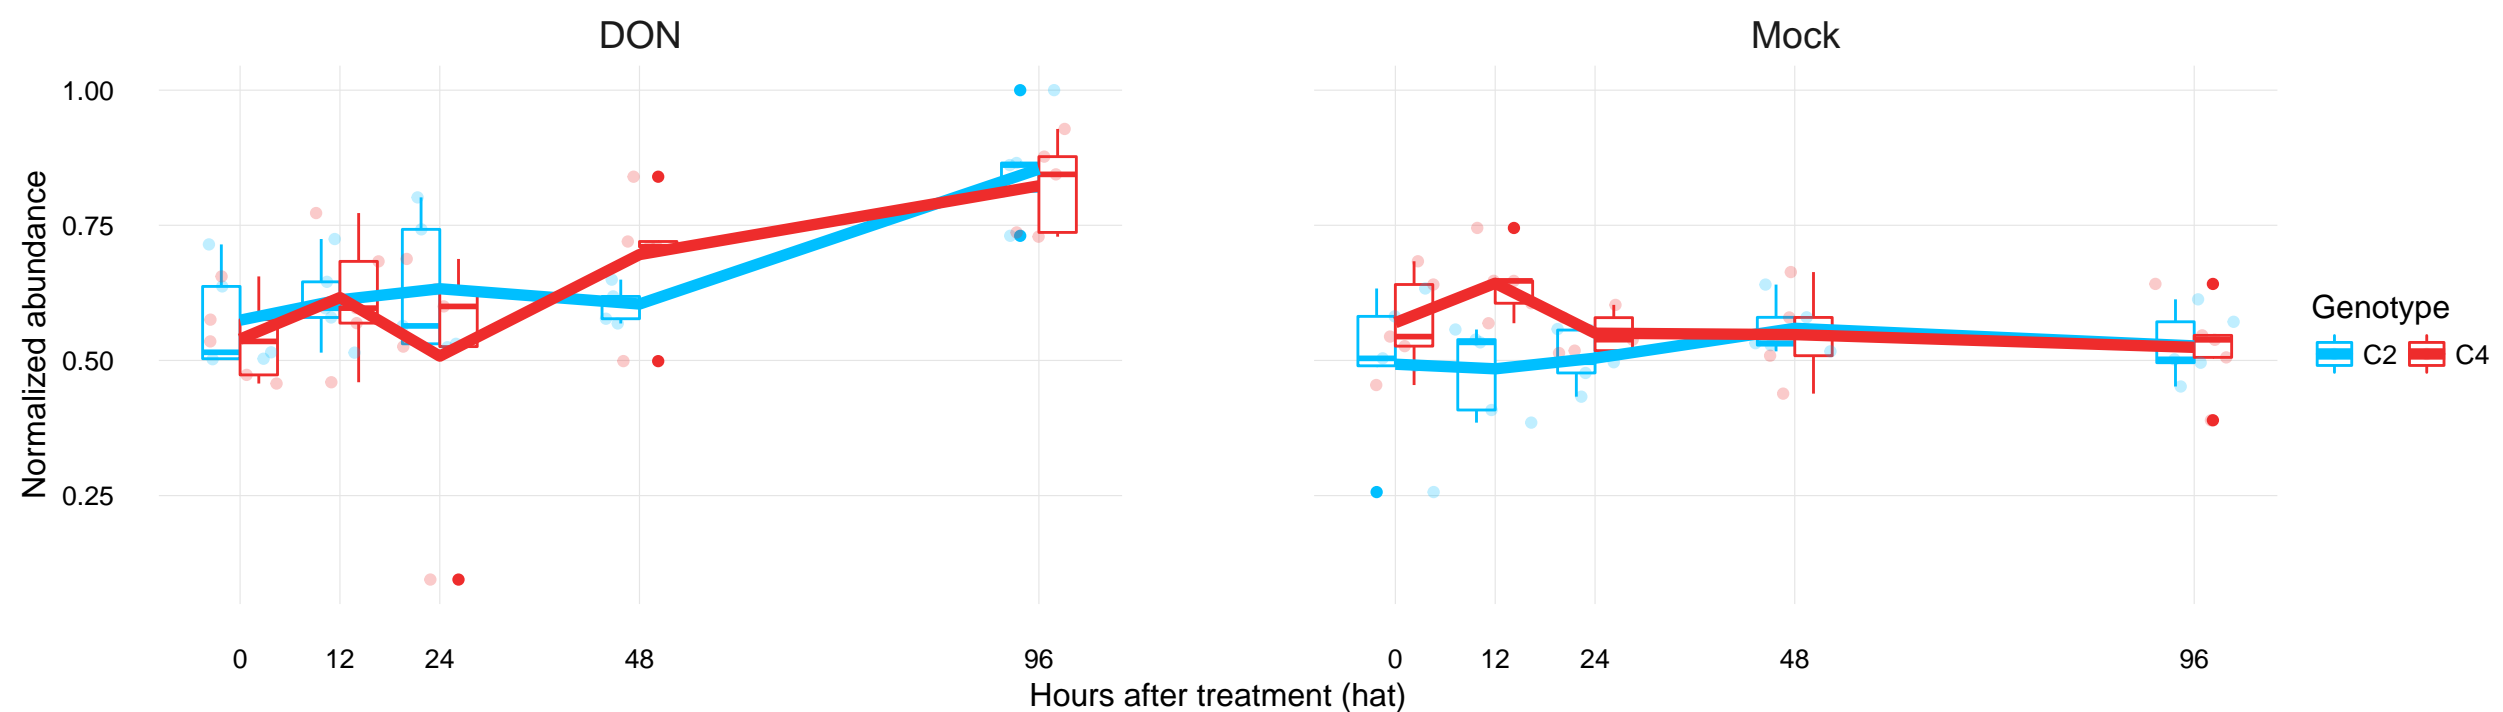

## CM, Remus; different treatments

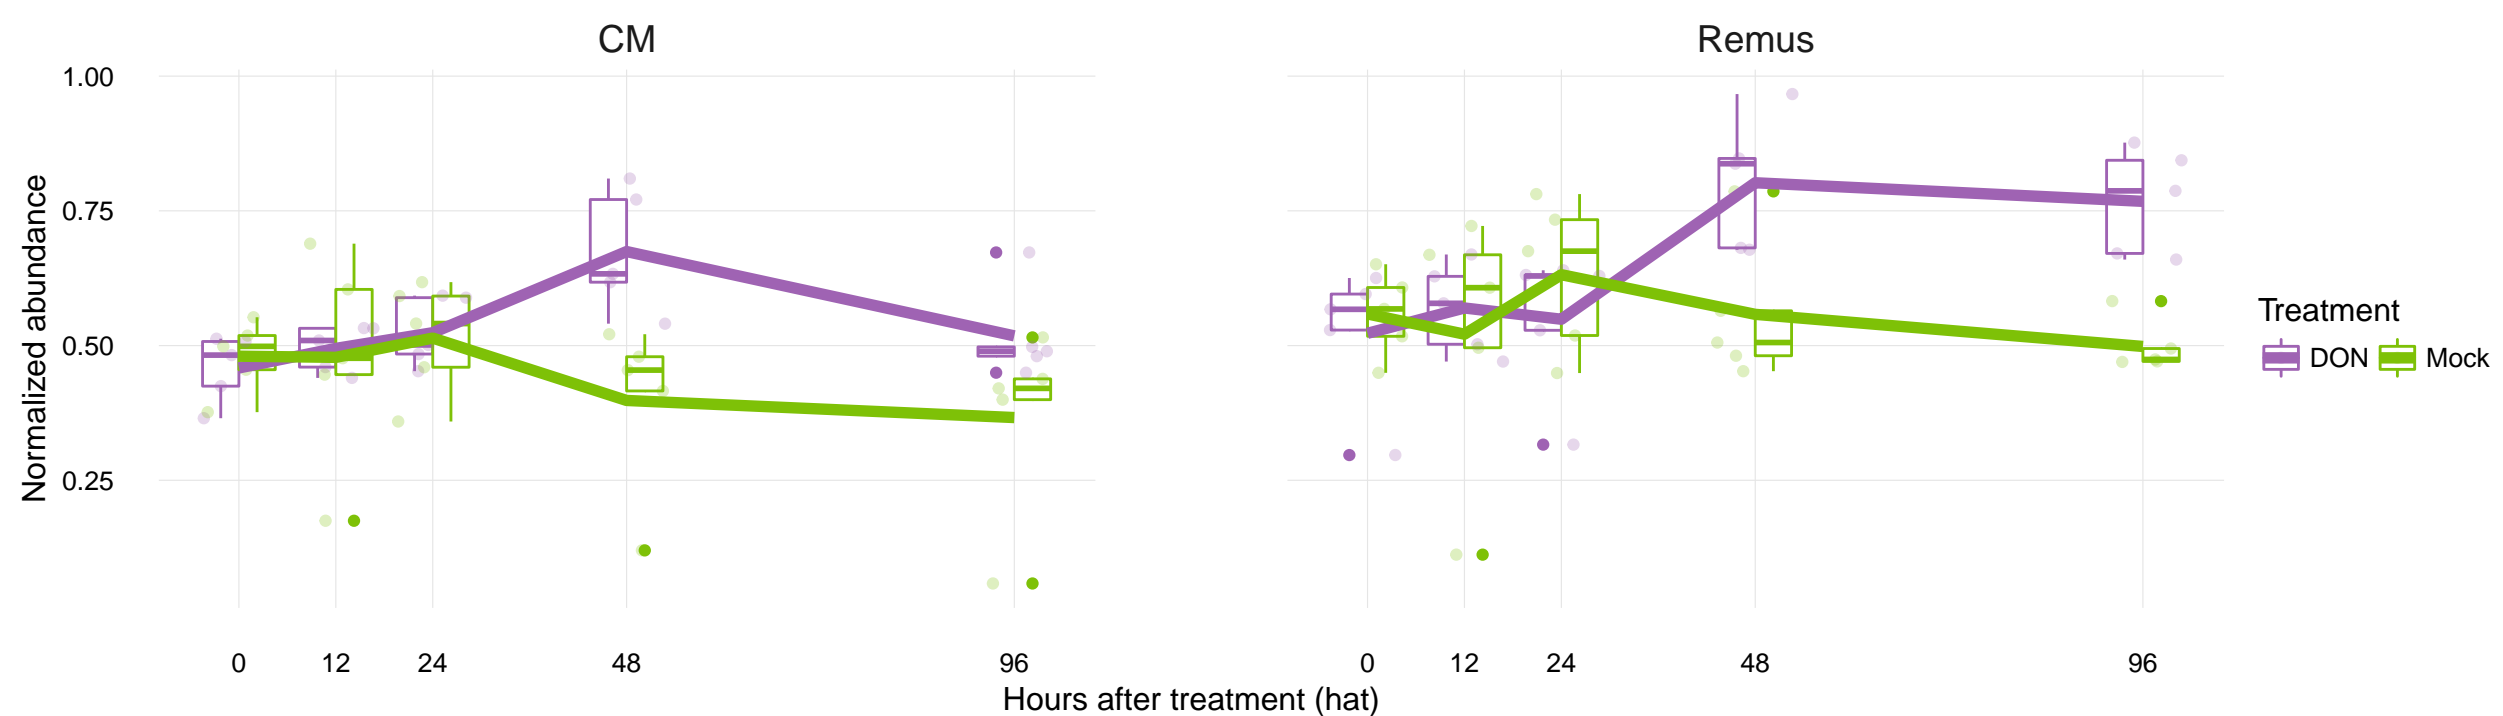

## DON, Mock; all four genotypes

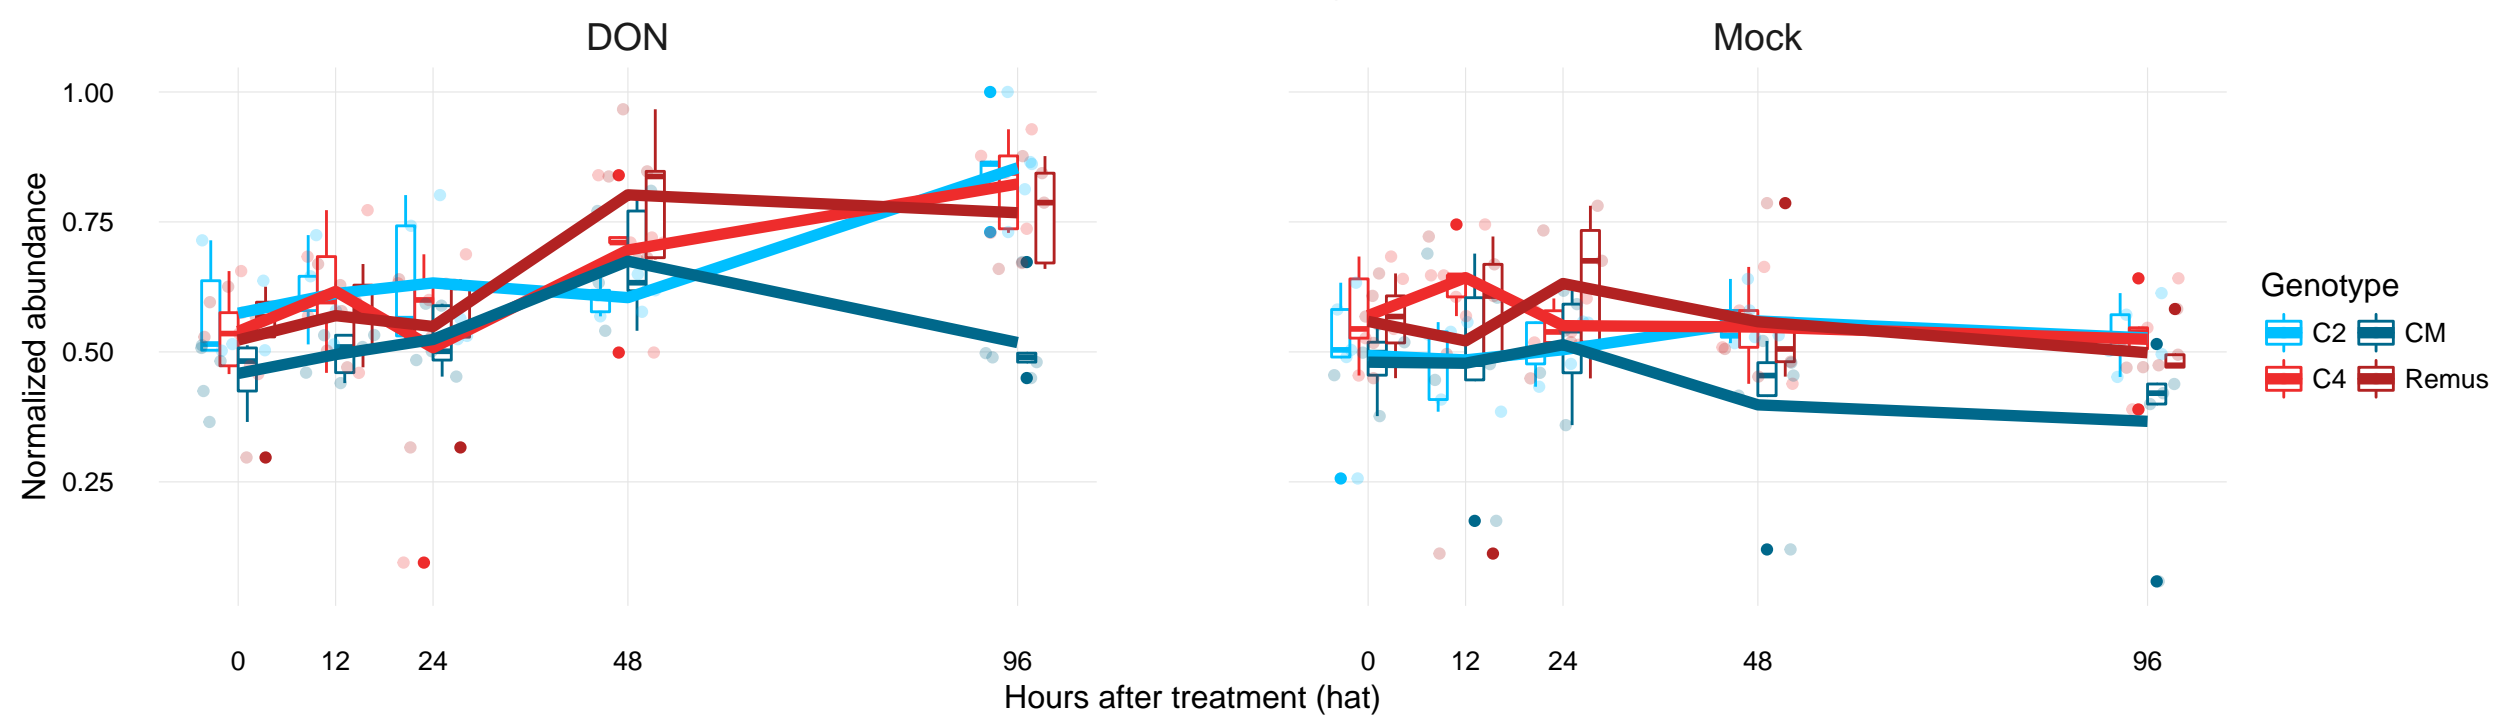



# U.8

Unknown Phe-derived wheat-metabolite

|                |                          |
|----------------|--------------------------|
| MZ             | 451.1216                 |
| RT             | 13.19 min                |
| Normalization  | Directly via KPX samples |
| Cluster        | Cluster 3                |
| Cn total / Phe | 9 / 9                    |

C2, C4; different treatments

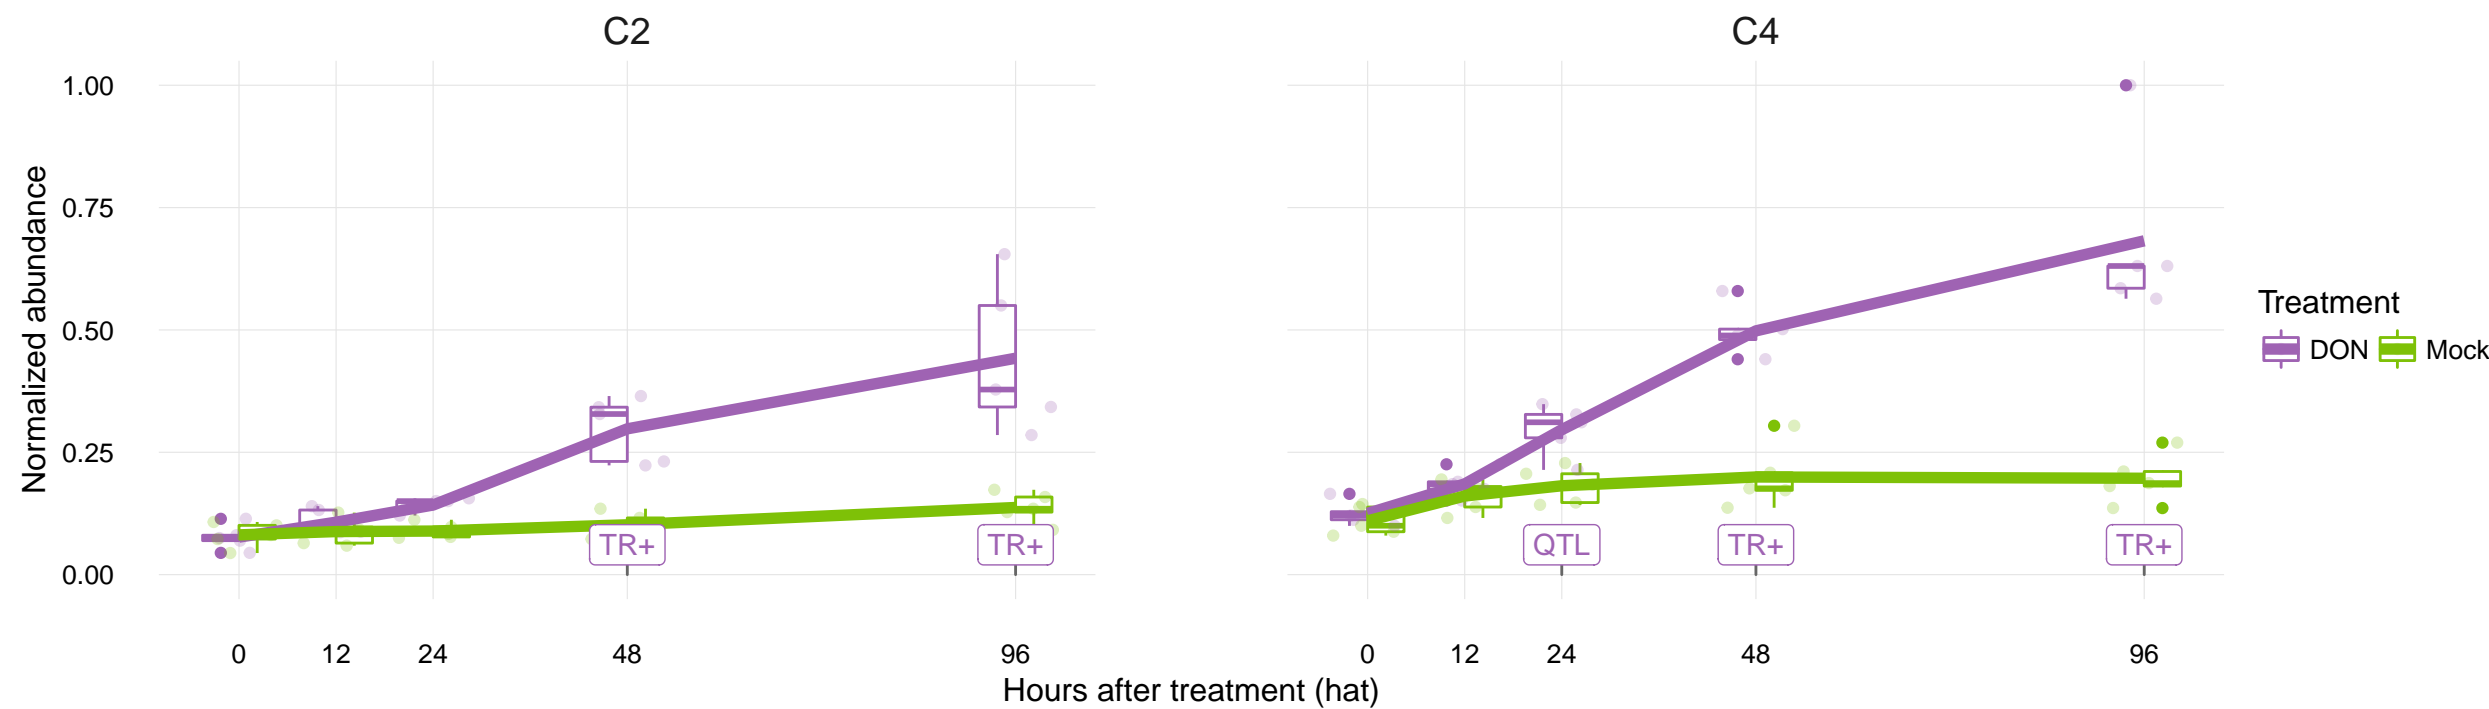

DON, Mock; different genotypes

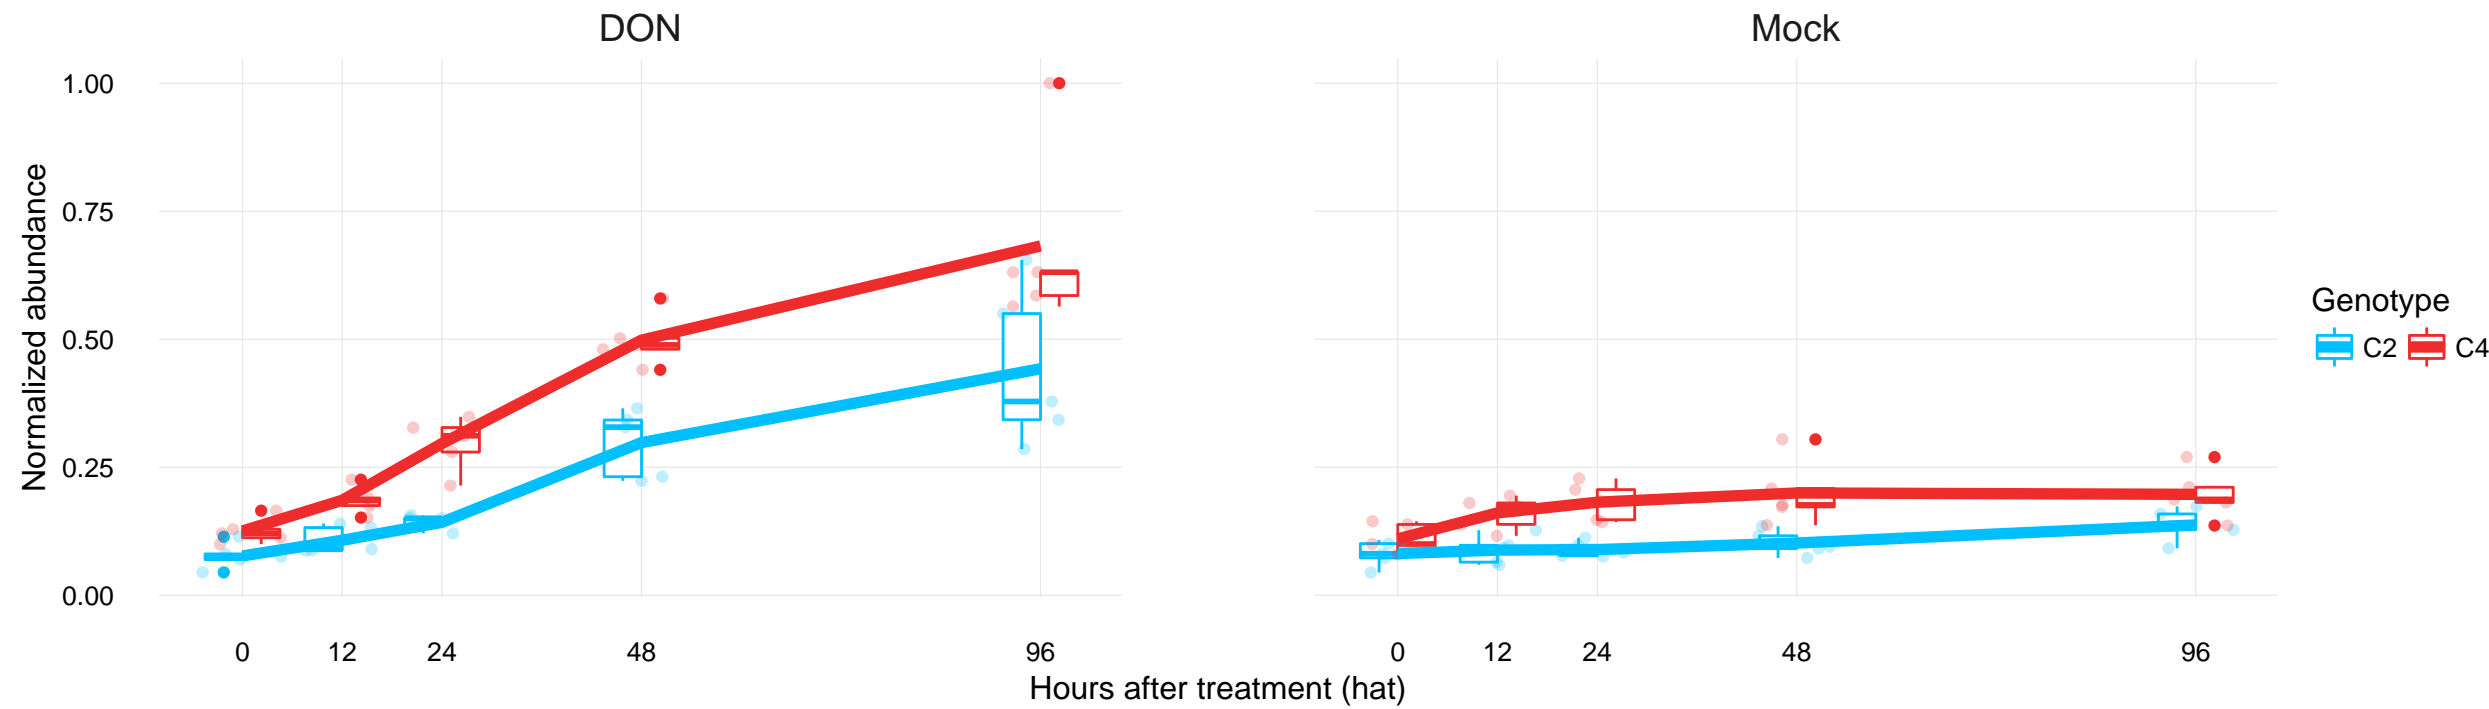

CM, Remus; different treatments

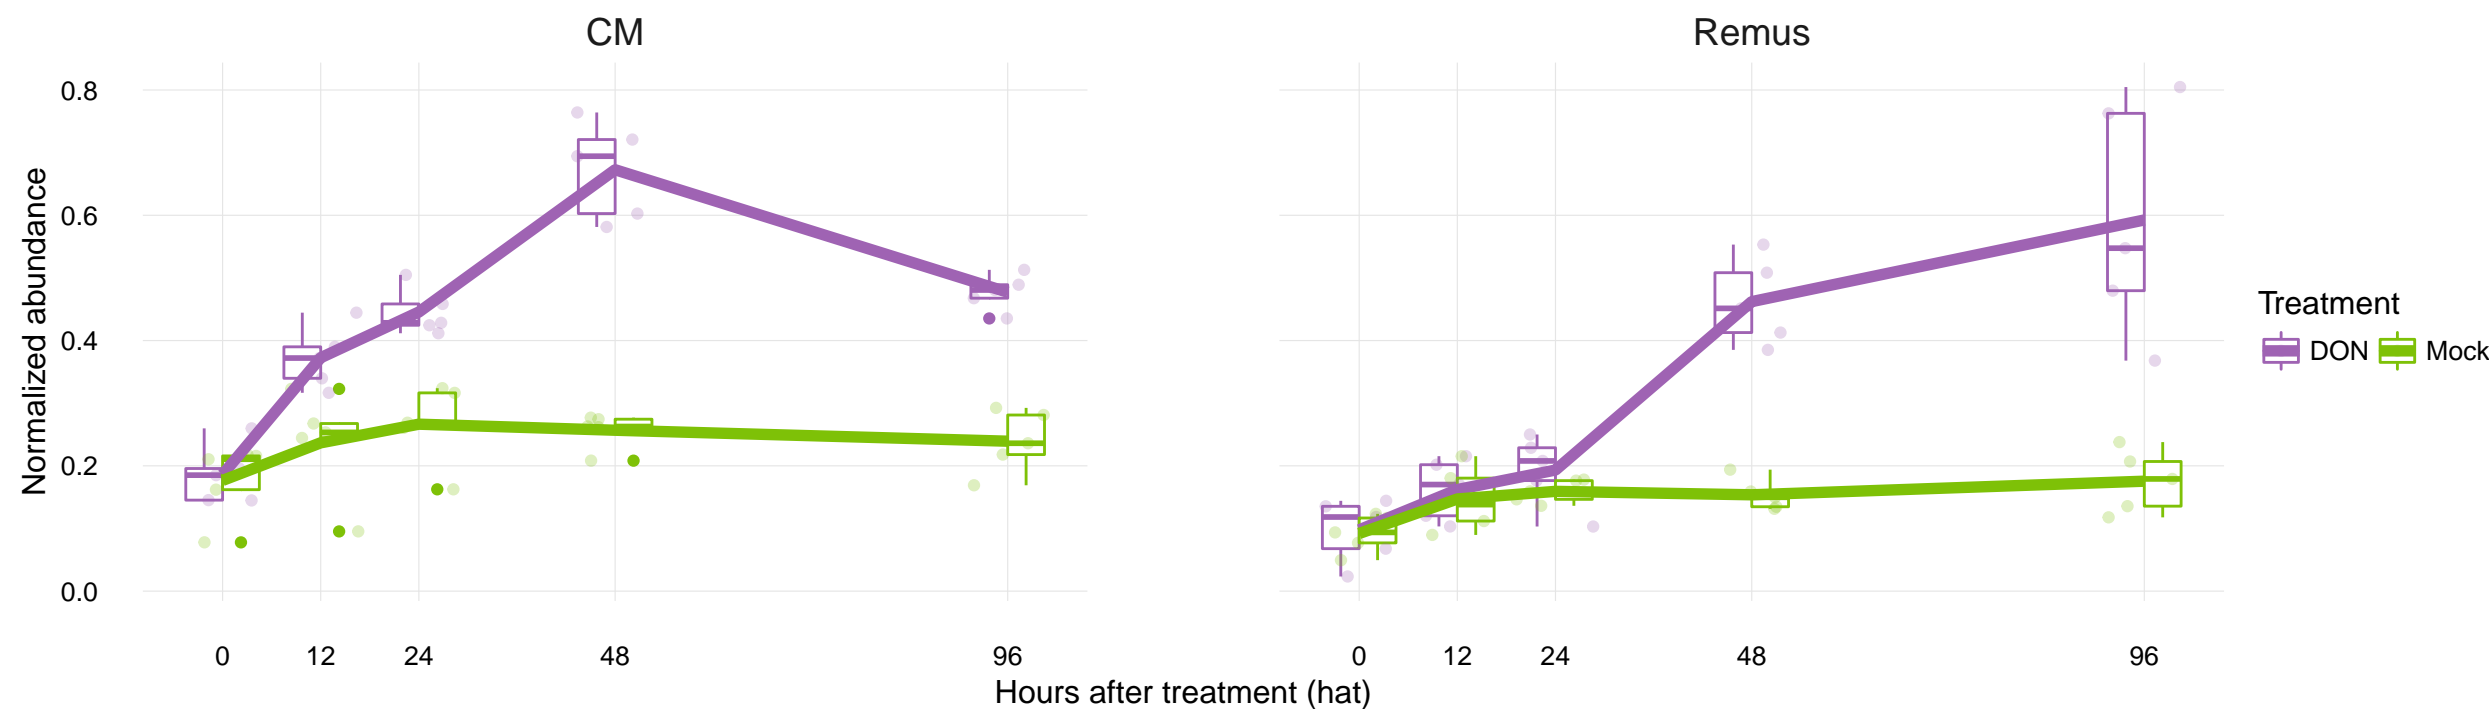

DON, Mock; all four genotypes

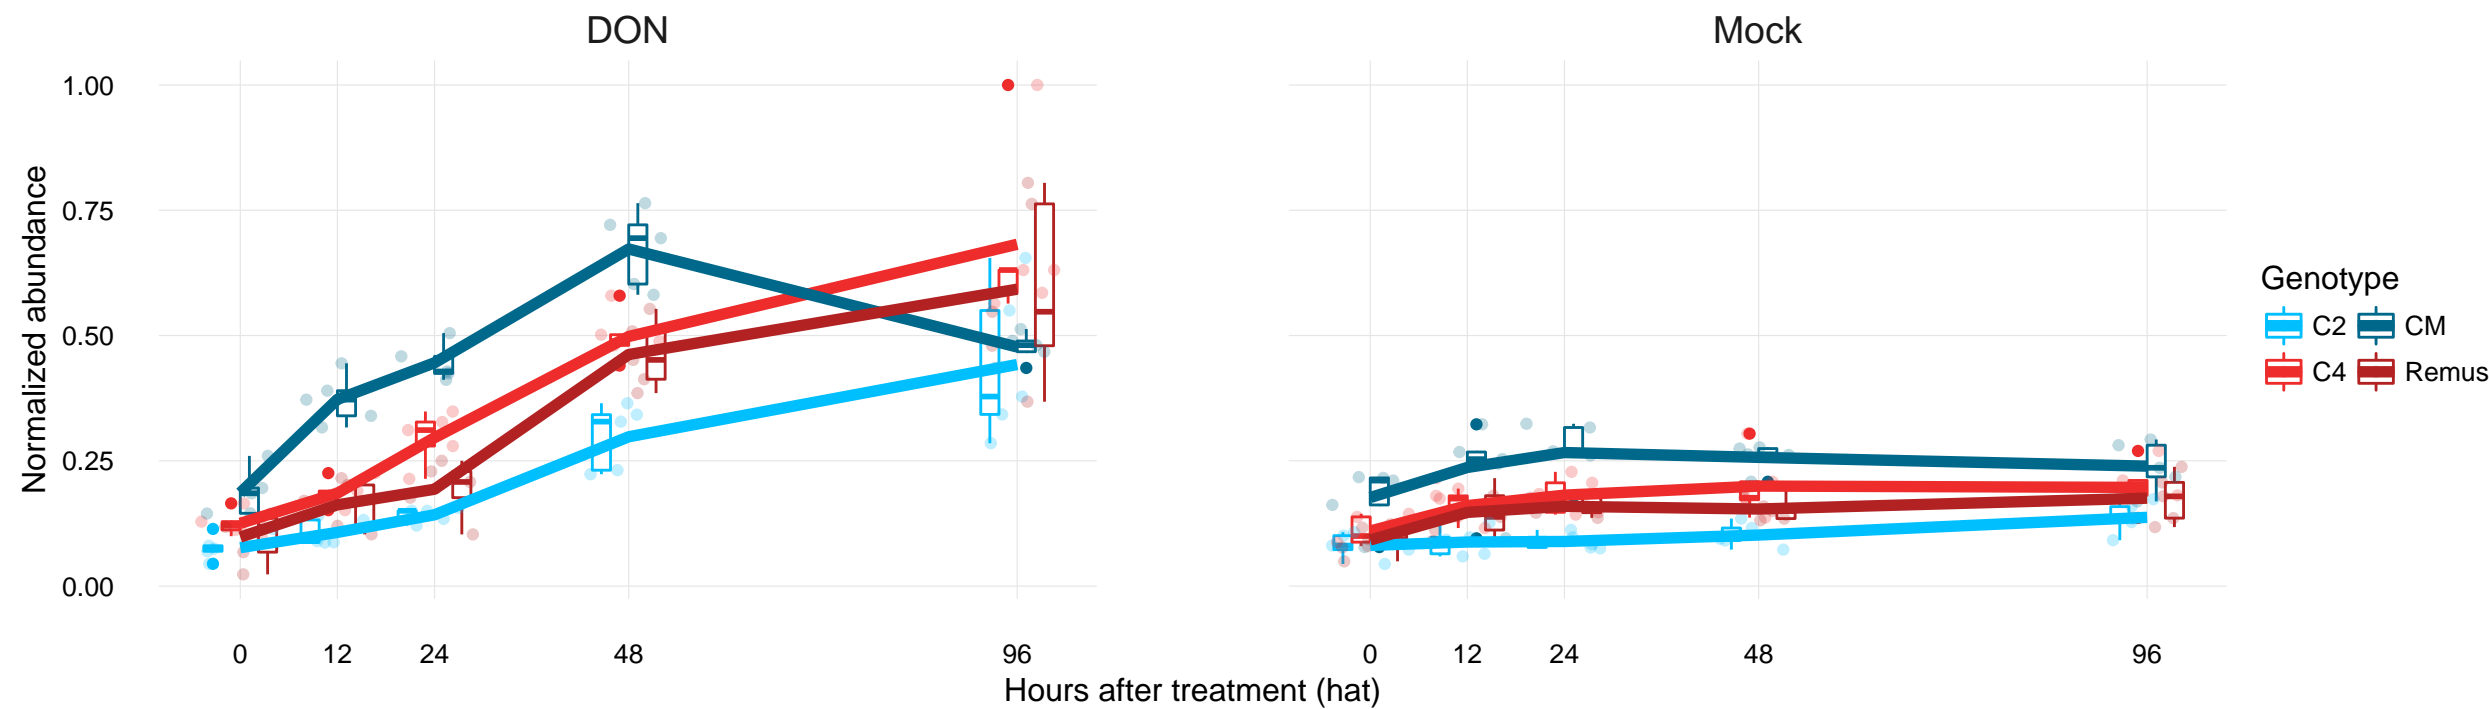

# A.66

Annotated as HCA derivative  
(2 database hits)

|                |                          |
|----------------|--------------------------|
| MZ             | 239.0915                 |
| RT             | 13.16 min                |
| Normalization  | Directly via KPX samples |
| Cluster        | Cluster 3                |
| Cn total / Phe | 12 / 9                   |

## C2, C4; different treatments

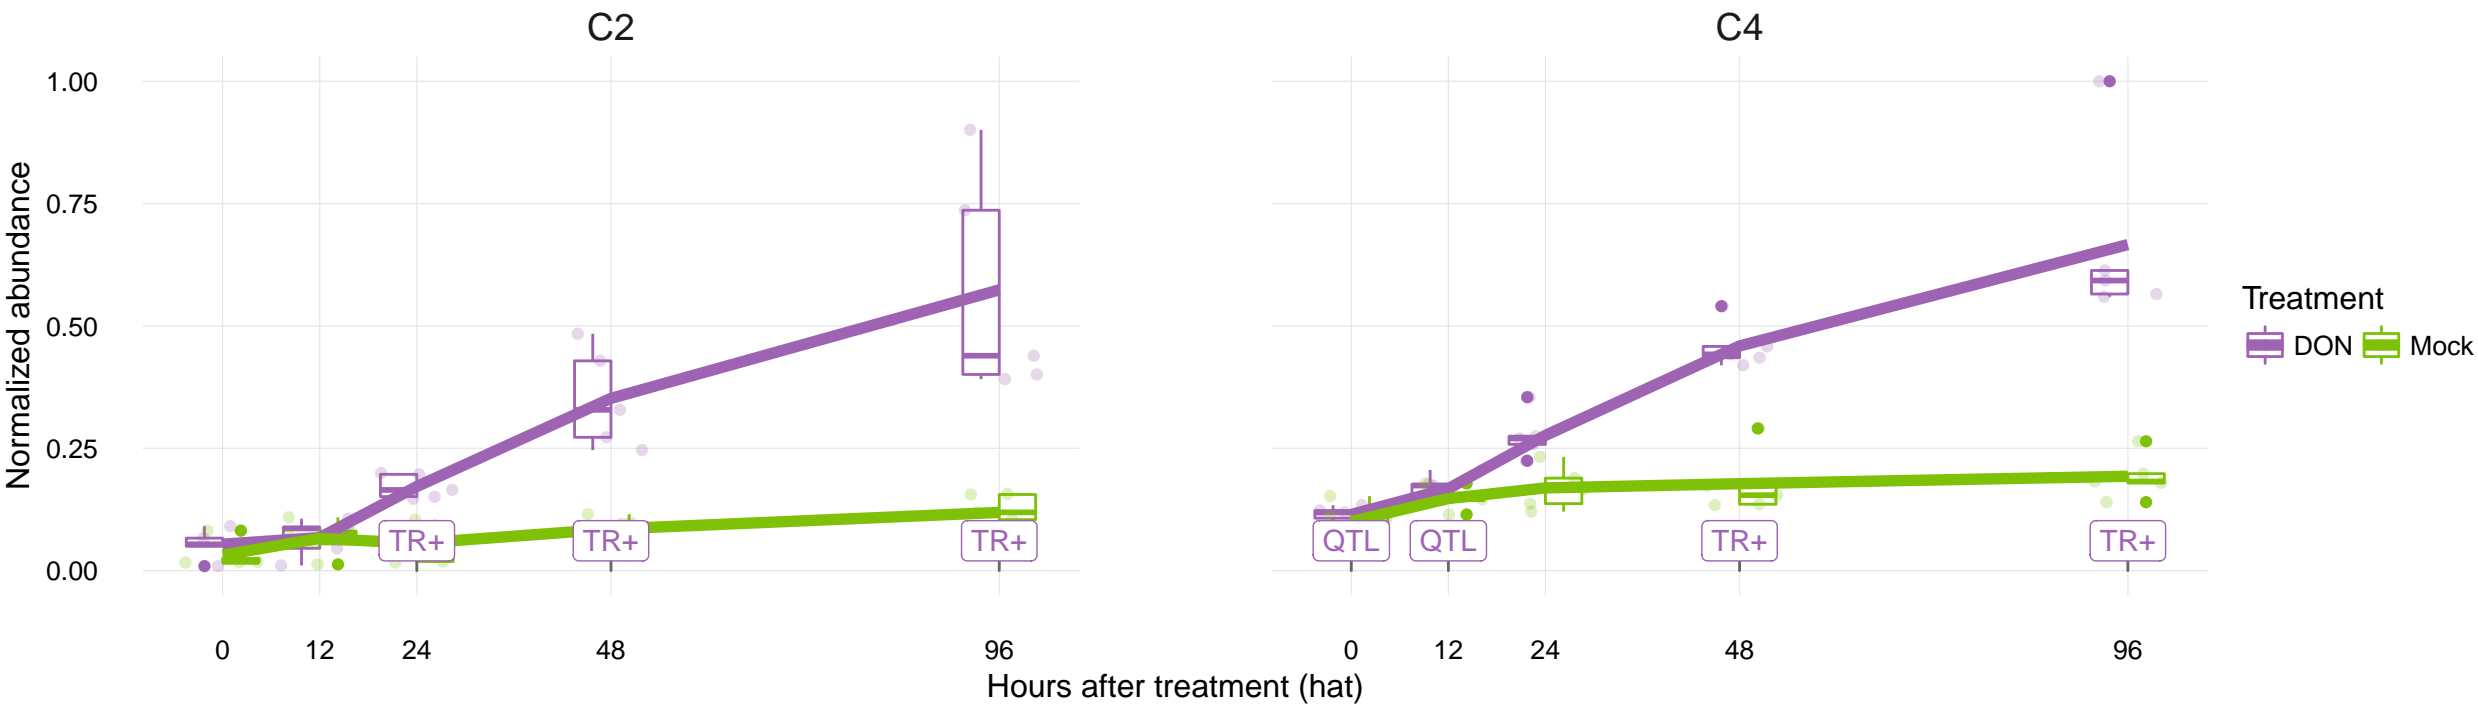

## DON, Mock; different genotypes

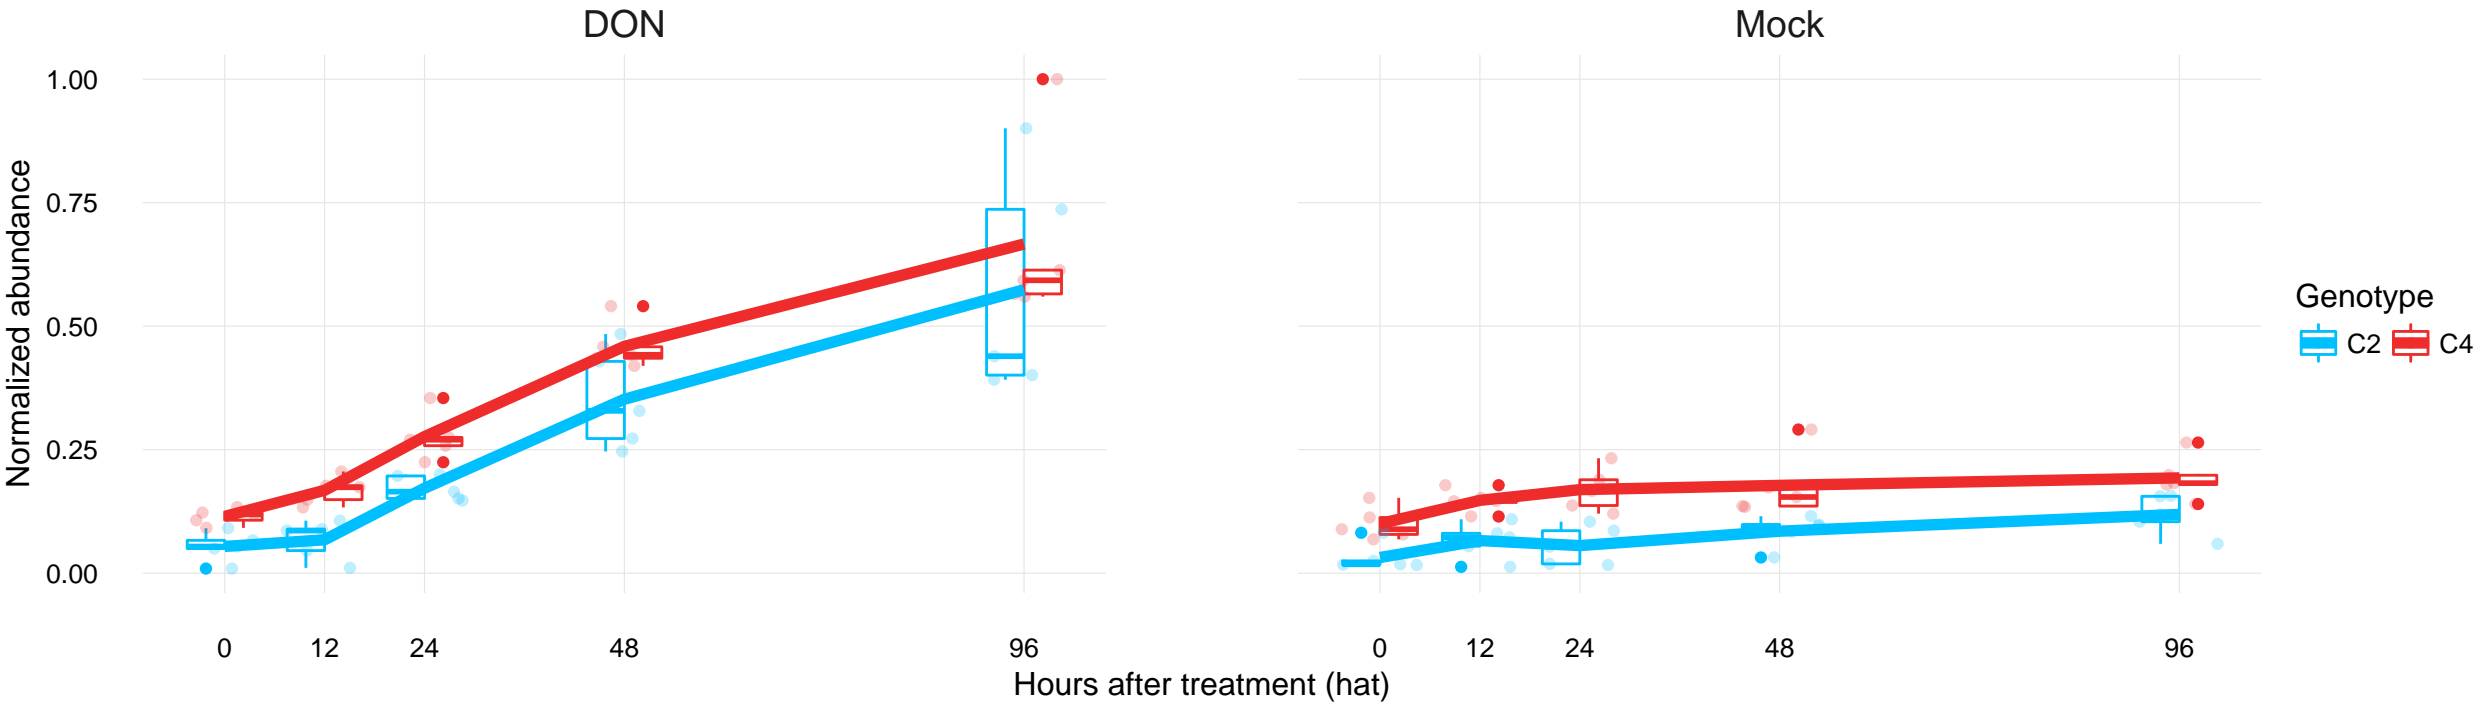

## CM, Remus; different treatments

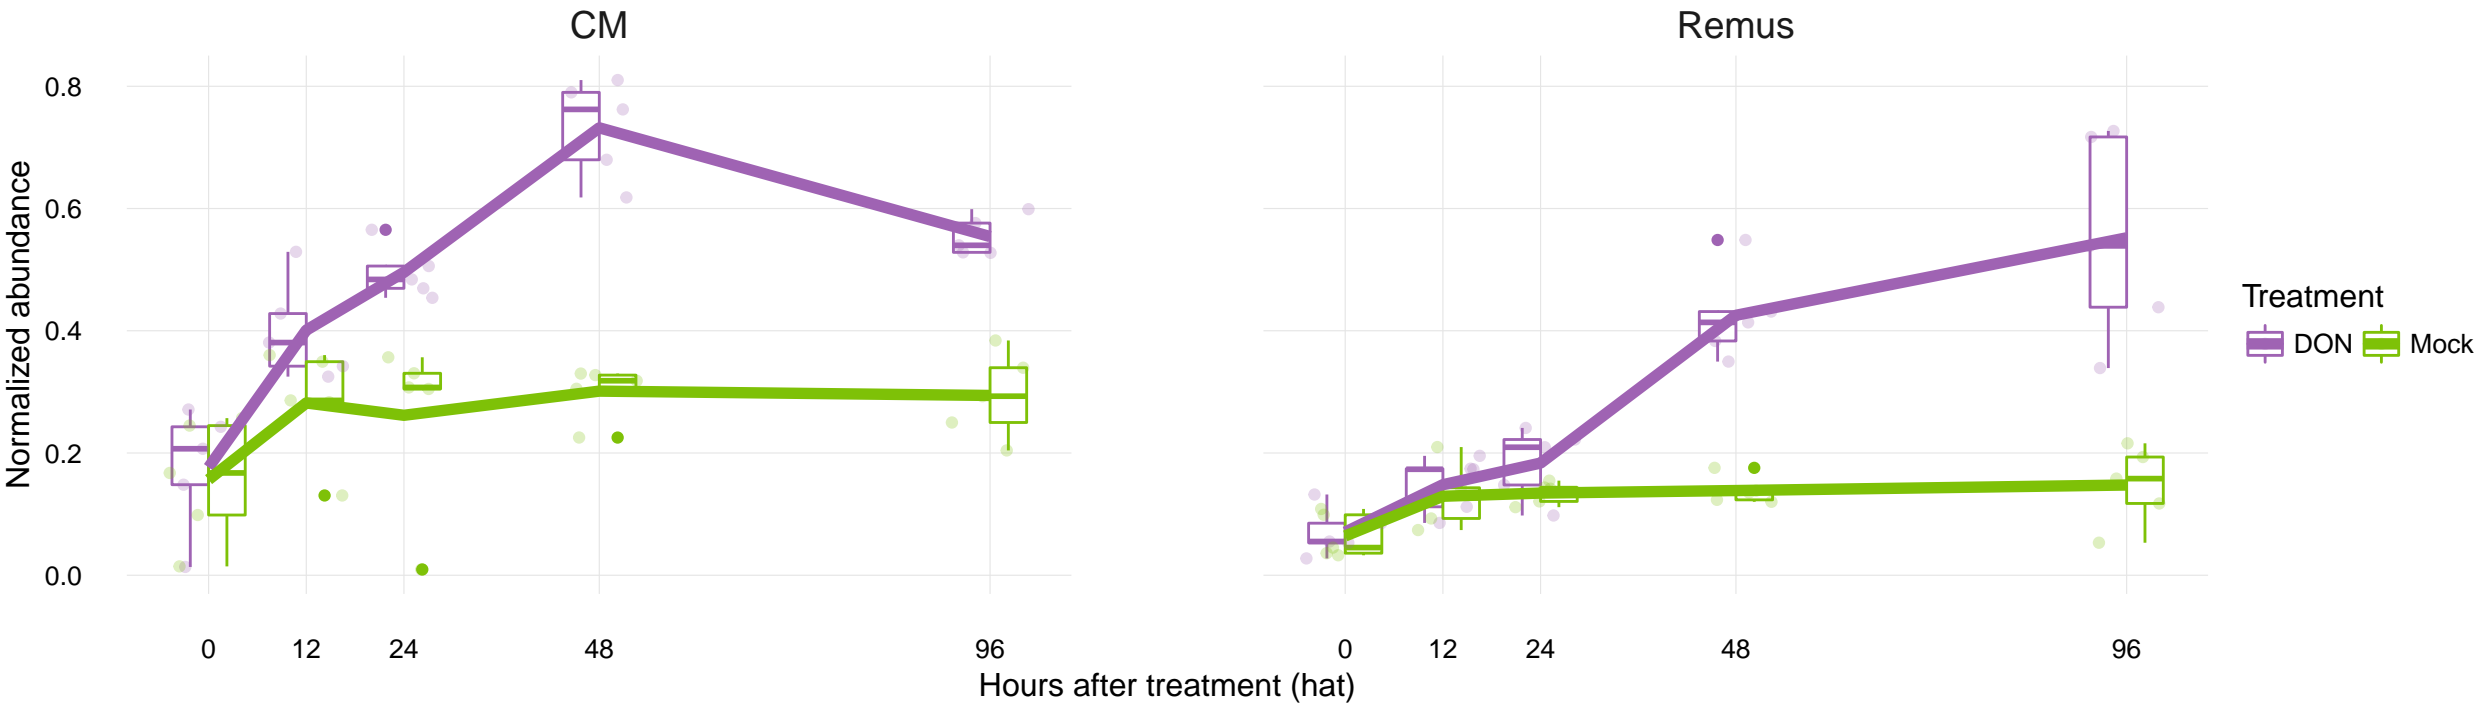

## DON, Mock; all four genotypes

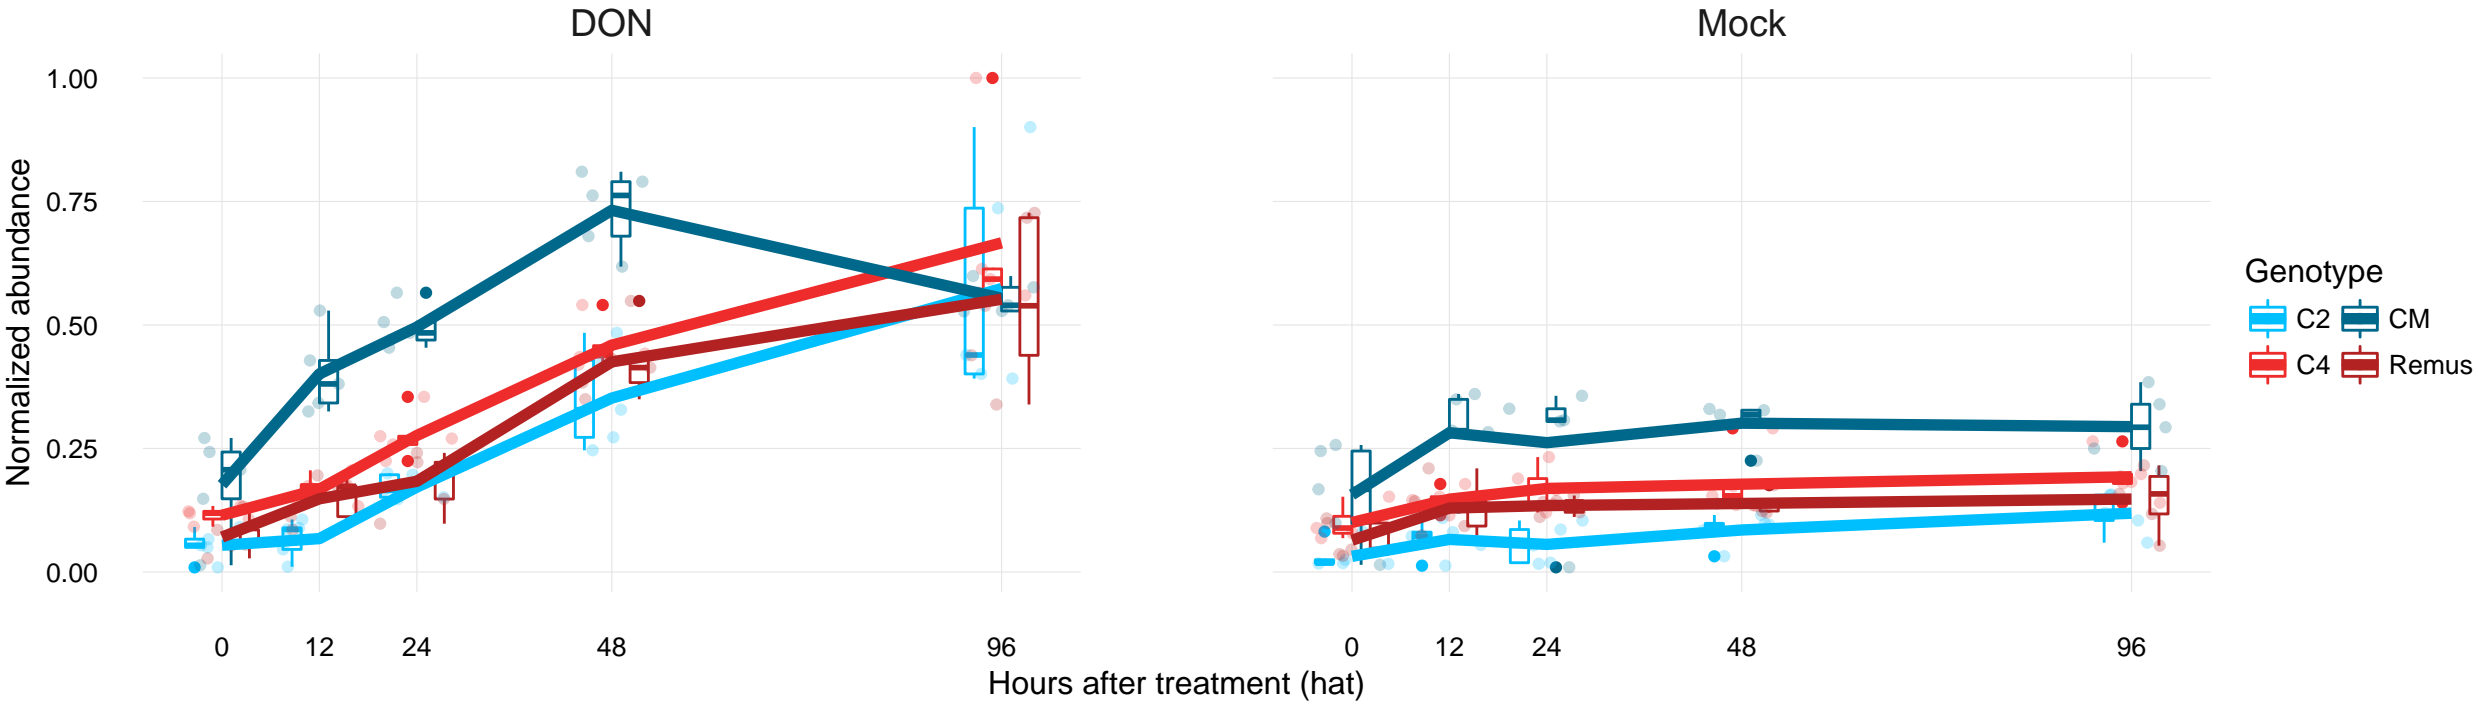

# A.57

Annotated as others (Phenol)  
(1 database hit)

|                |                          |
|----------------|--------------------------|
| MZ             | 185.0808                 |
| RT             | 12.76 min                |
| Normalization  | Directly via KPX samples |
| Cluster        | Cluster 3                |
| Cn total / Phe | 9 / 6                    |

## C2, C4; different treatments

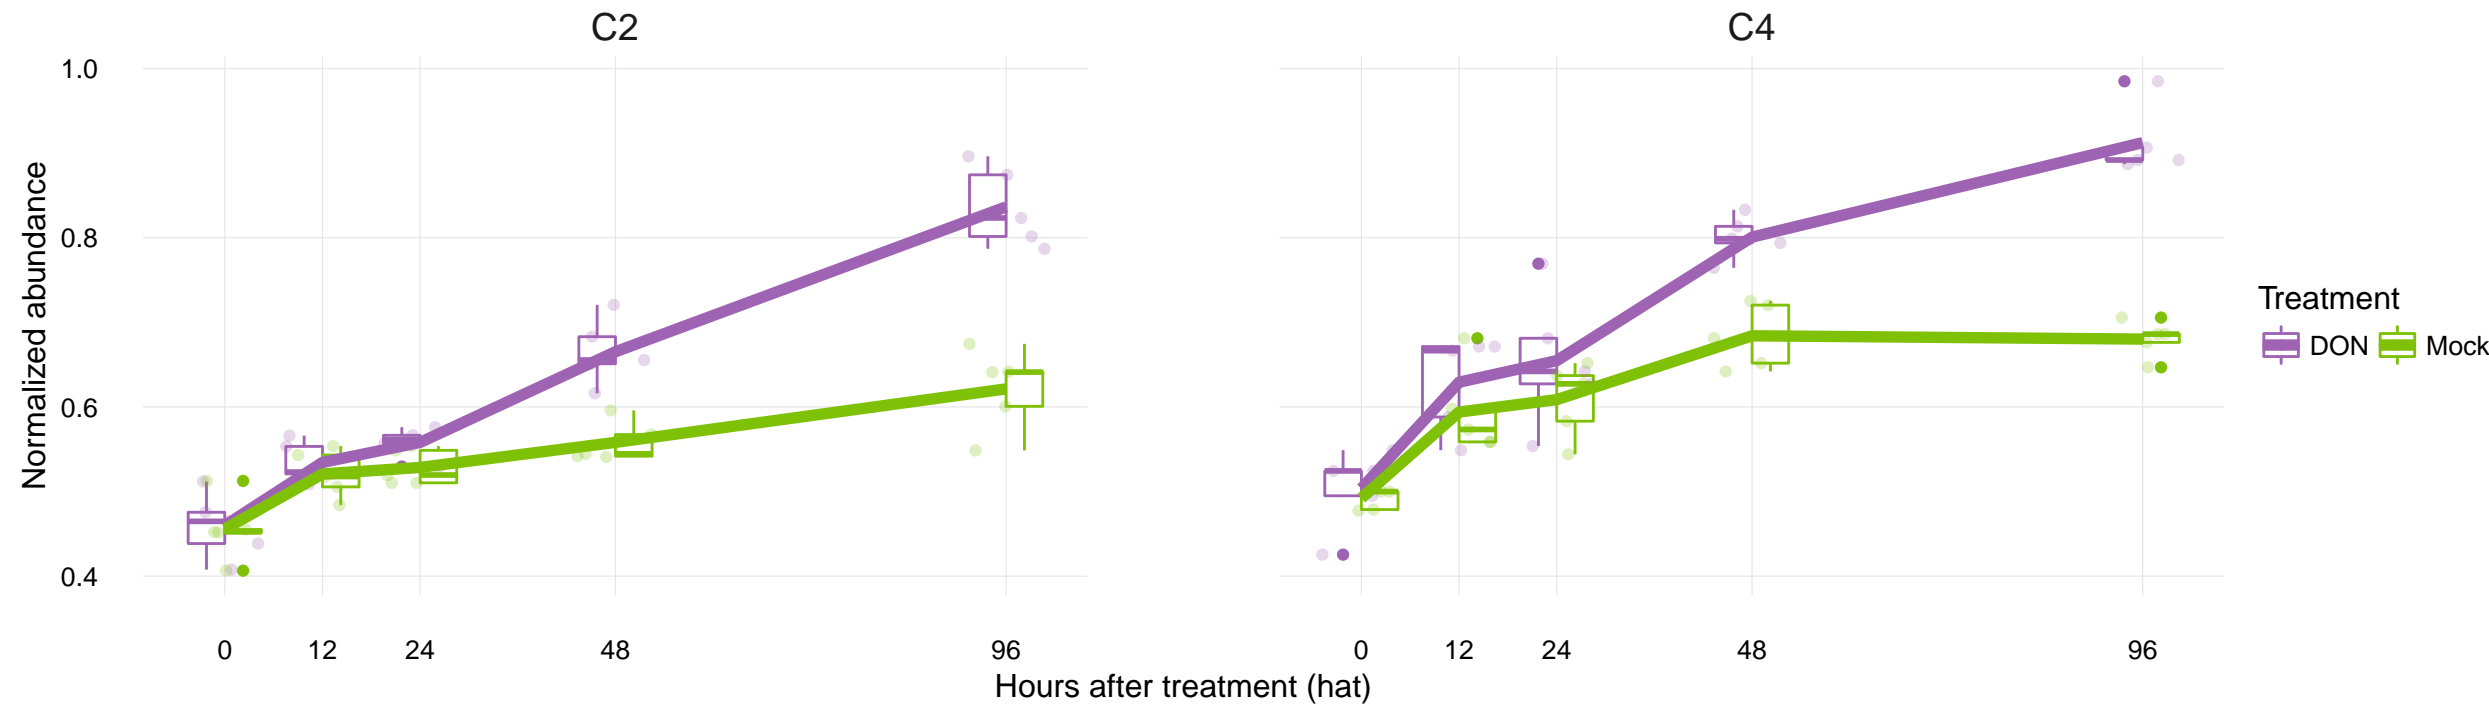

## DON, Mock; different genotypes

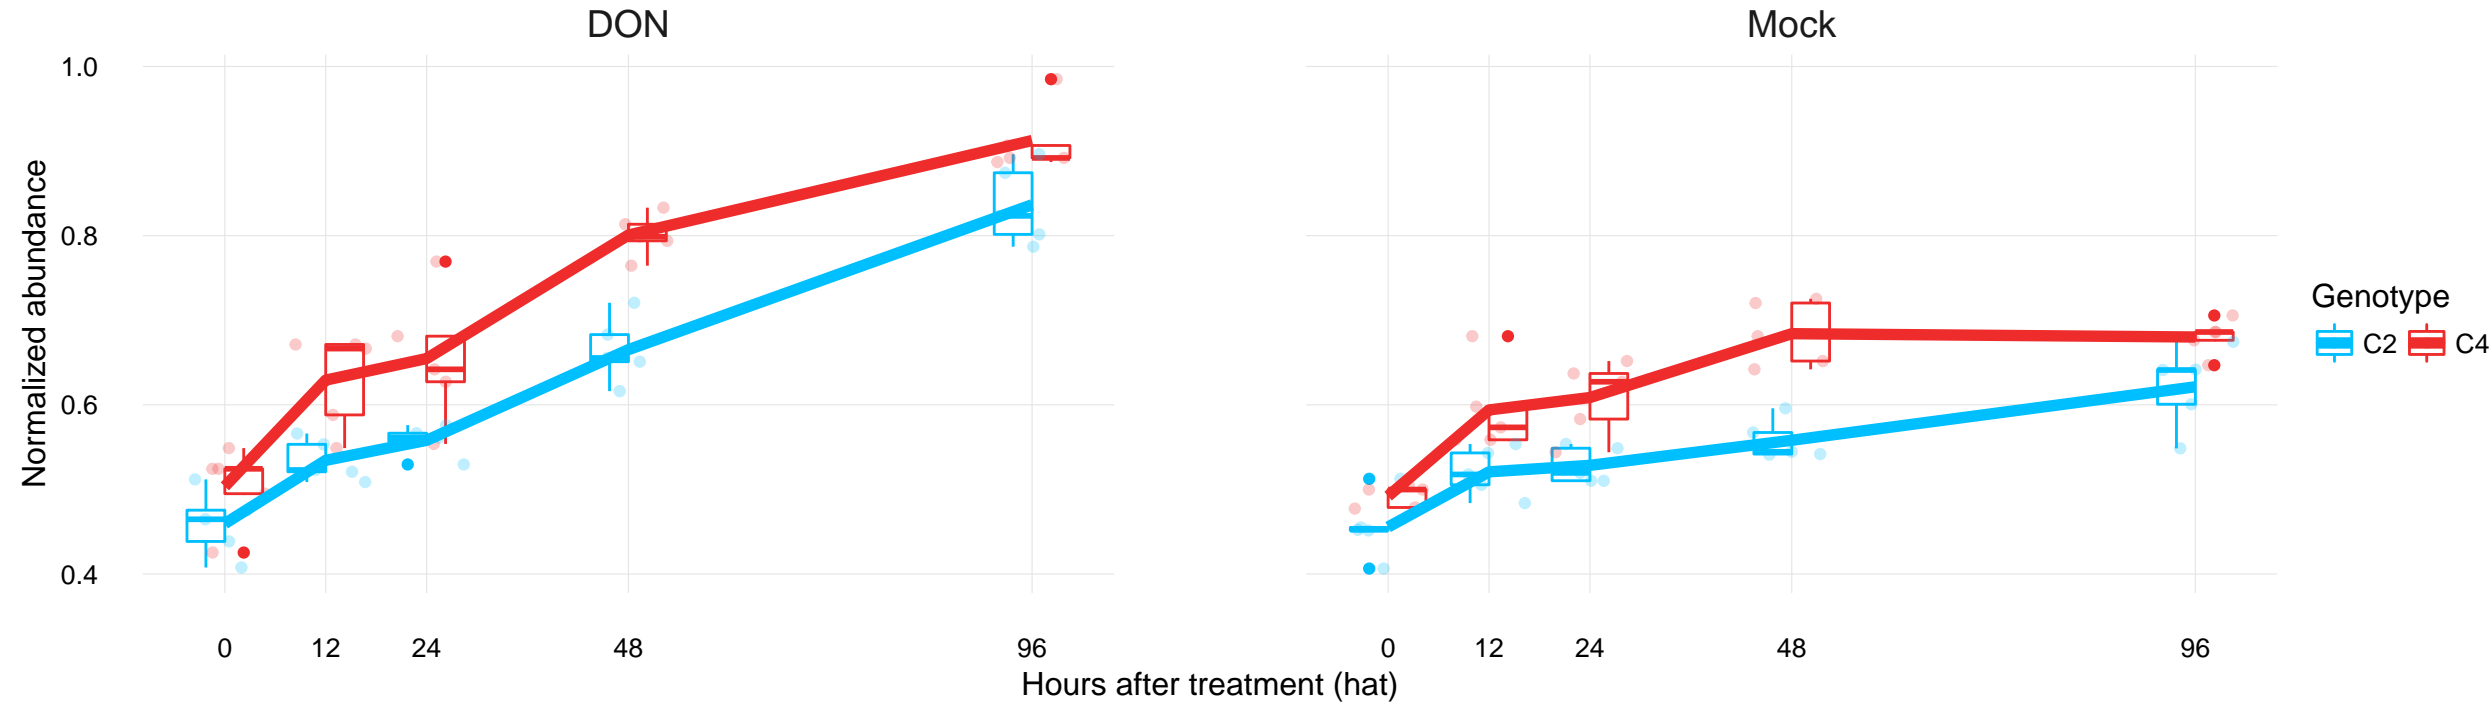

## CM, Remus; different treatments

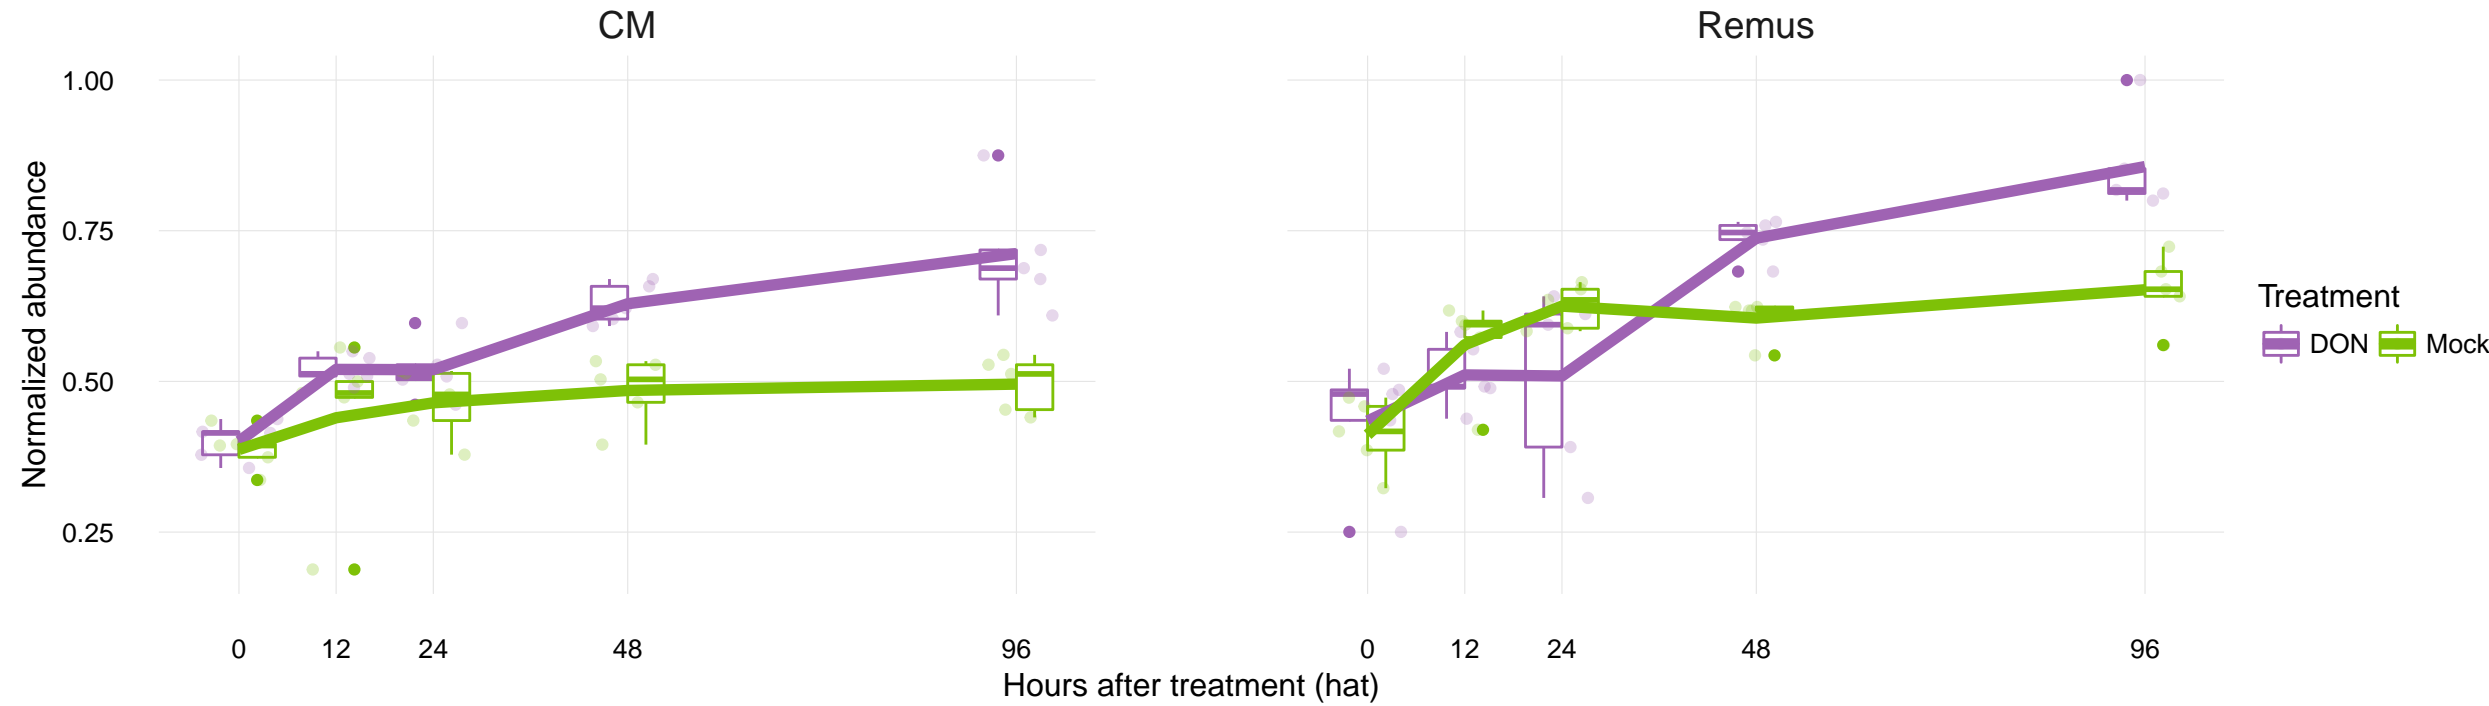

## DON, Mock; all four genotypes

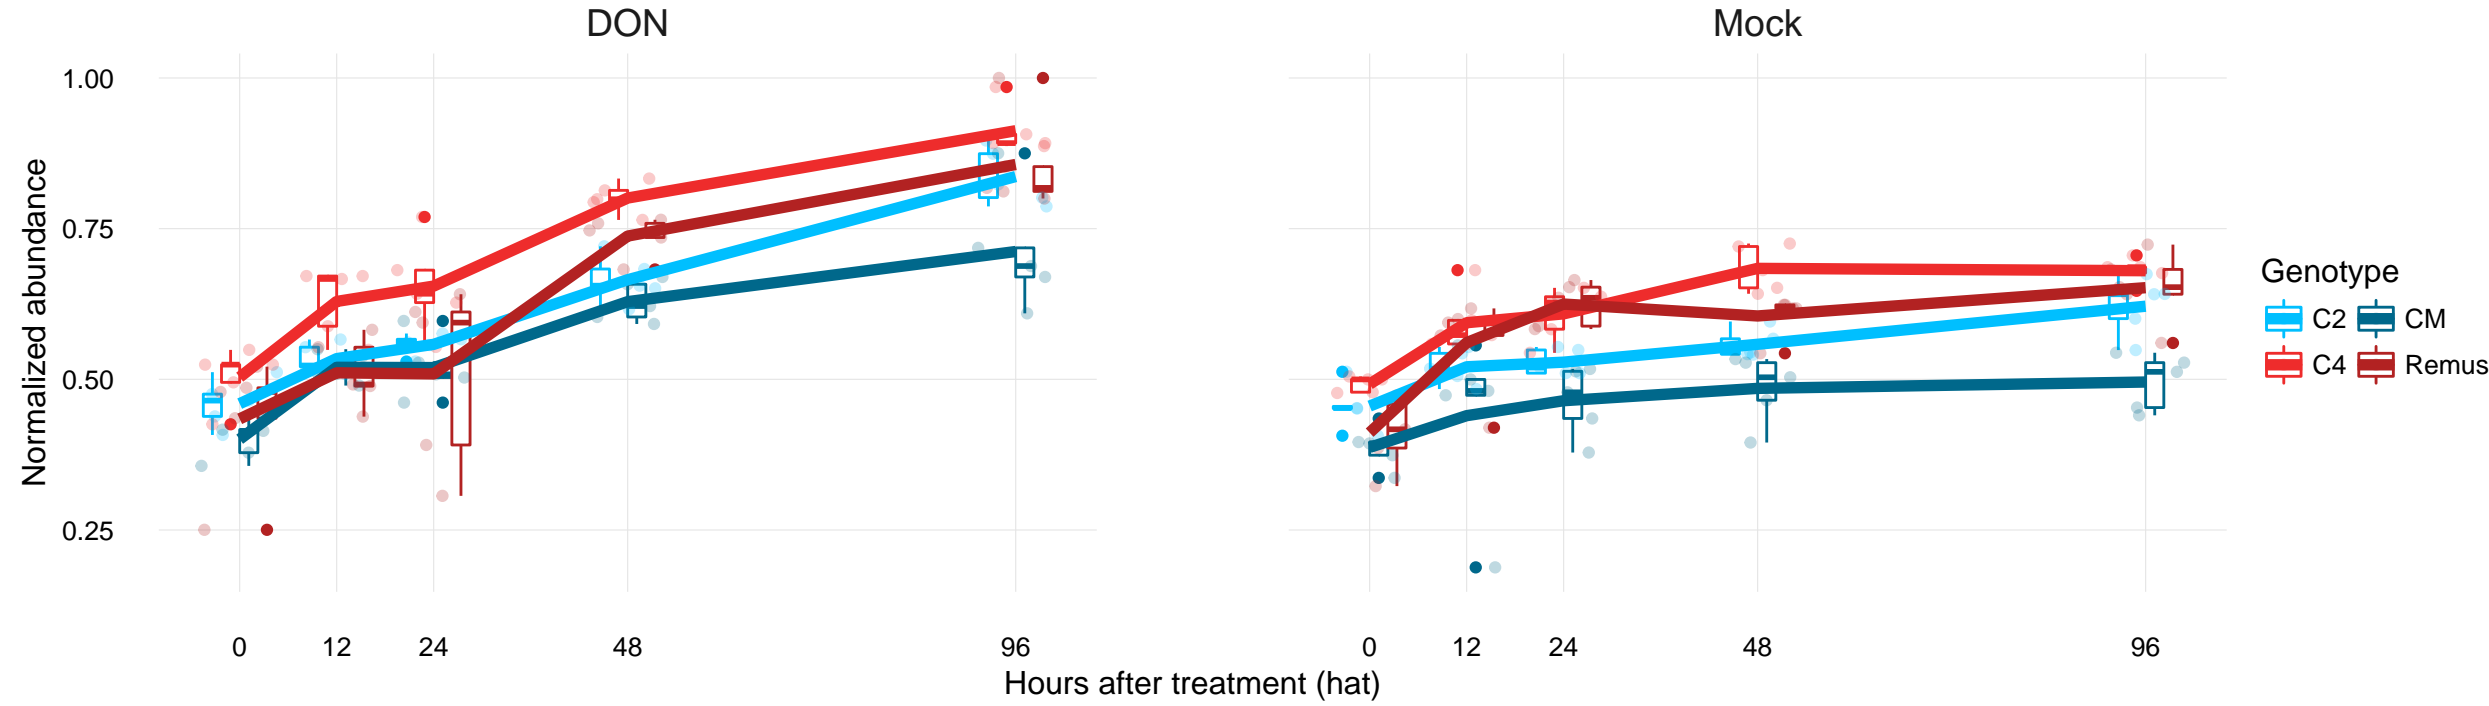

A.87

Annotated as Lignan  
(1 database hit)

|                |                          |
|----------------|--------------------------|
| MZ             | 603.205                  |
| RT             | 15.28 min                |
| Normalization  | Directly via KPX samples |
| Cluster        | Cluster 3                |
| Cn total / Phe | 28 /                     |

C2, C4; different treatments

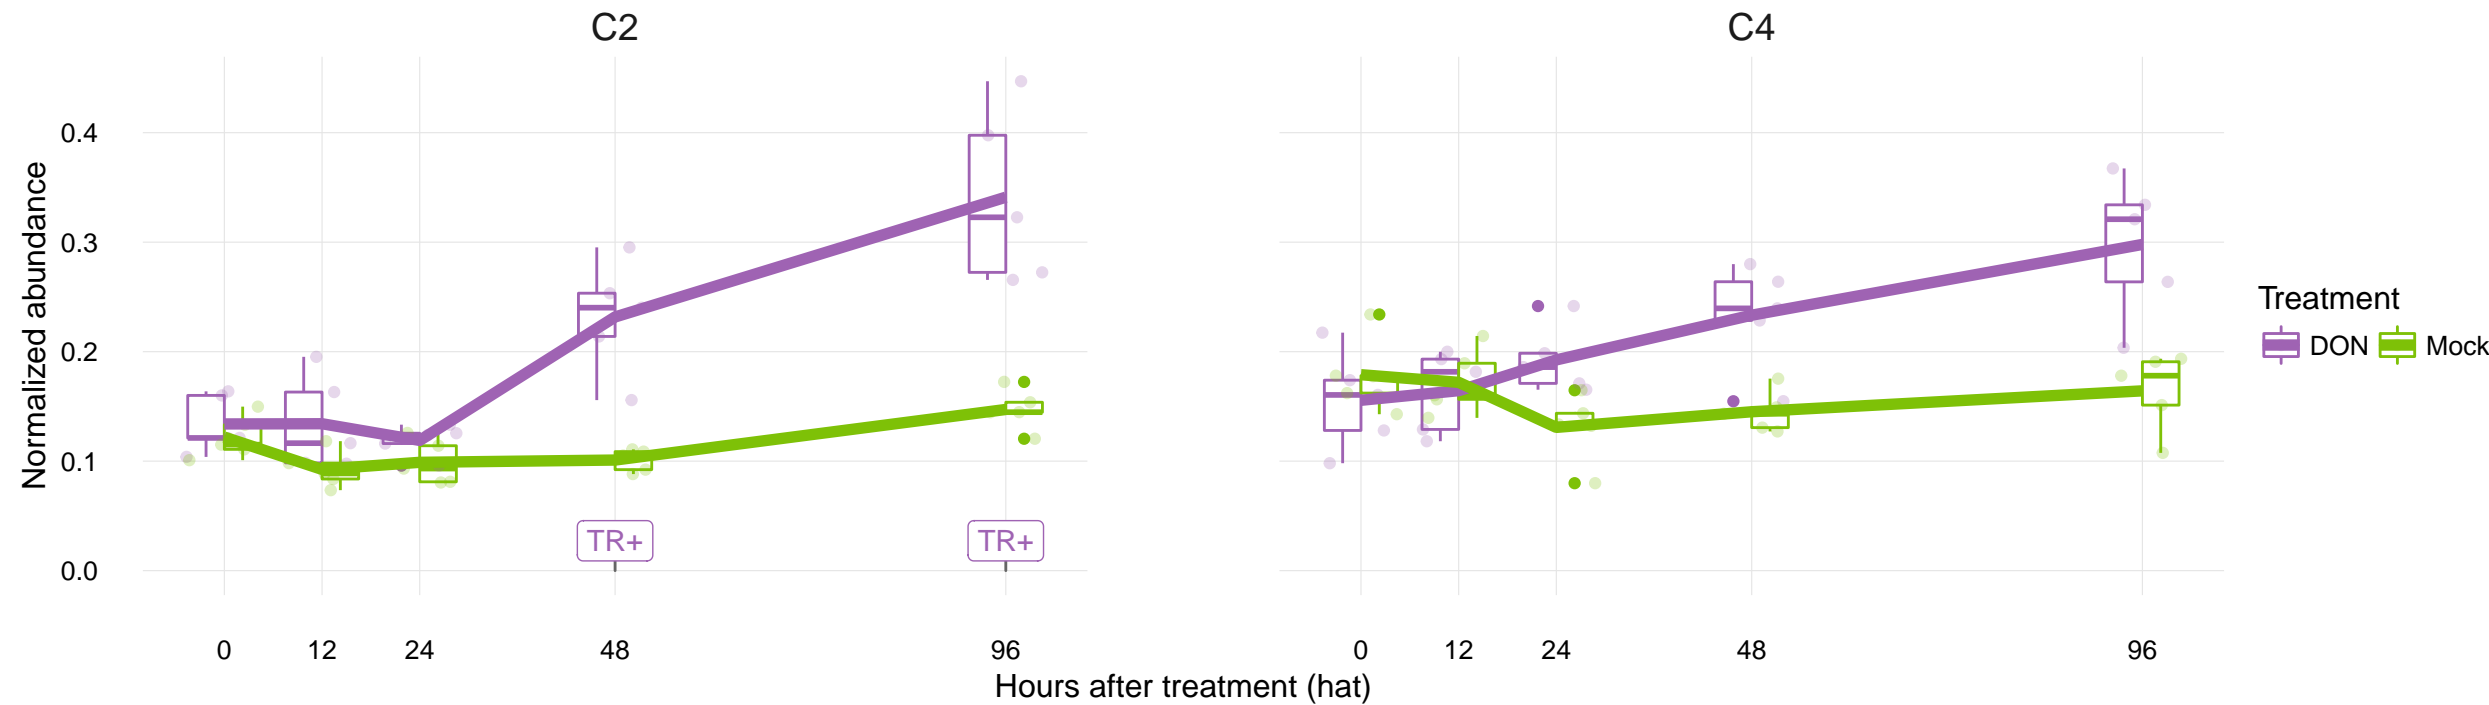

DON, Mock; different genotypes

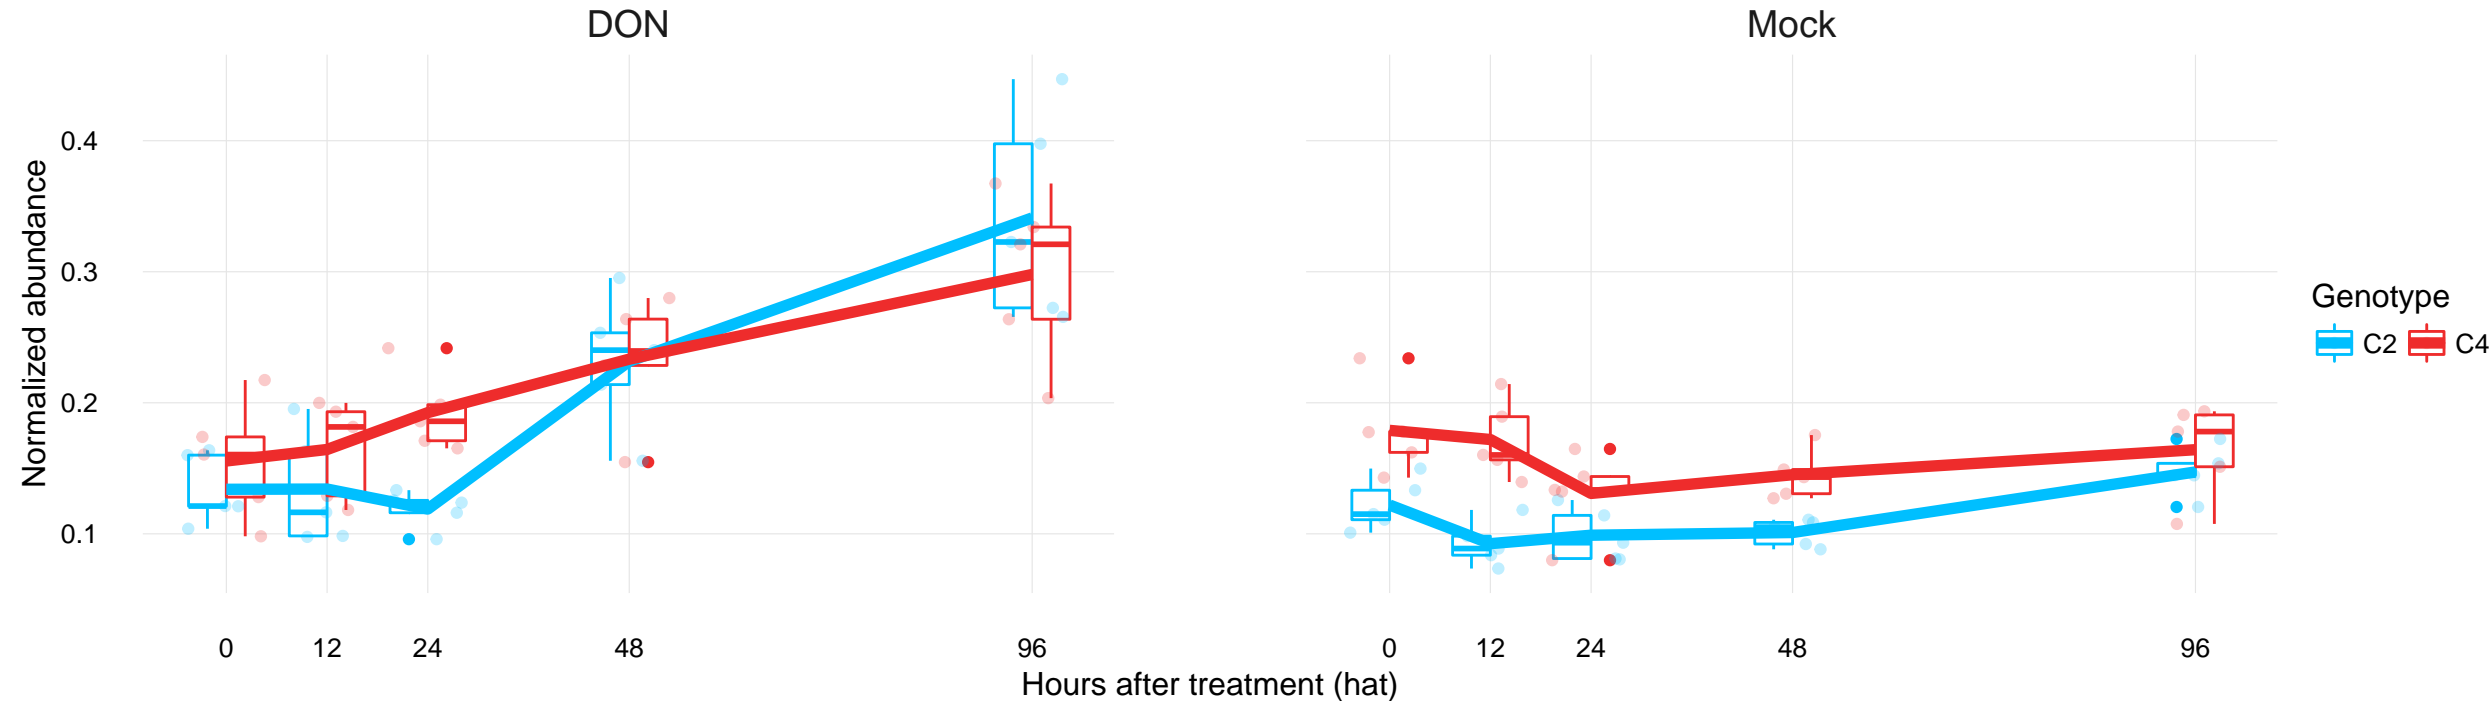

CM, Remus; different treatments

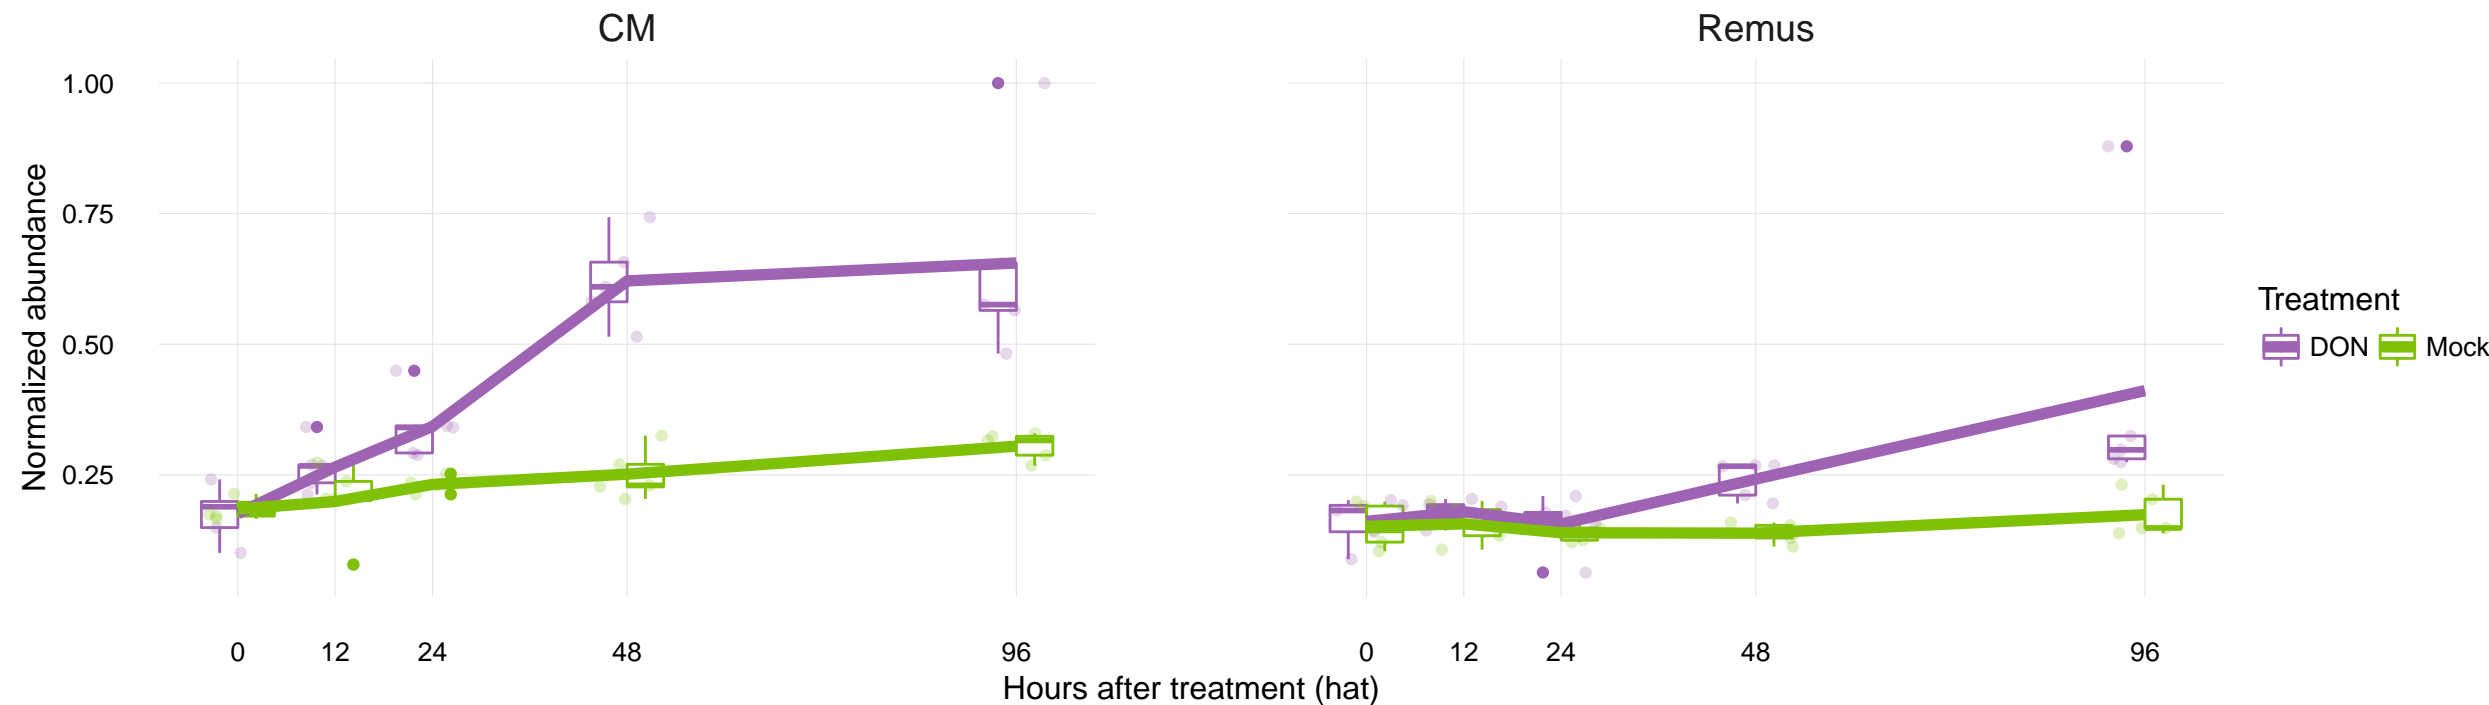

DON, Mock; all four genotypes

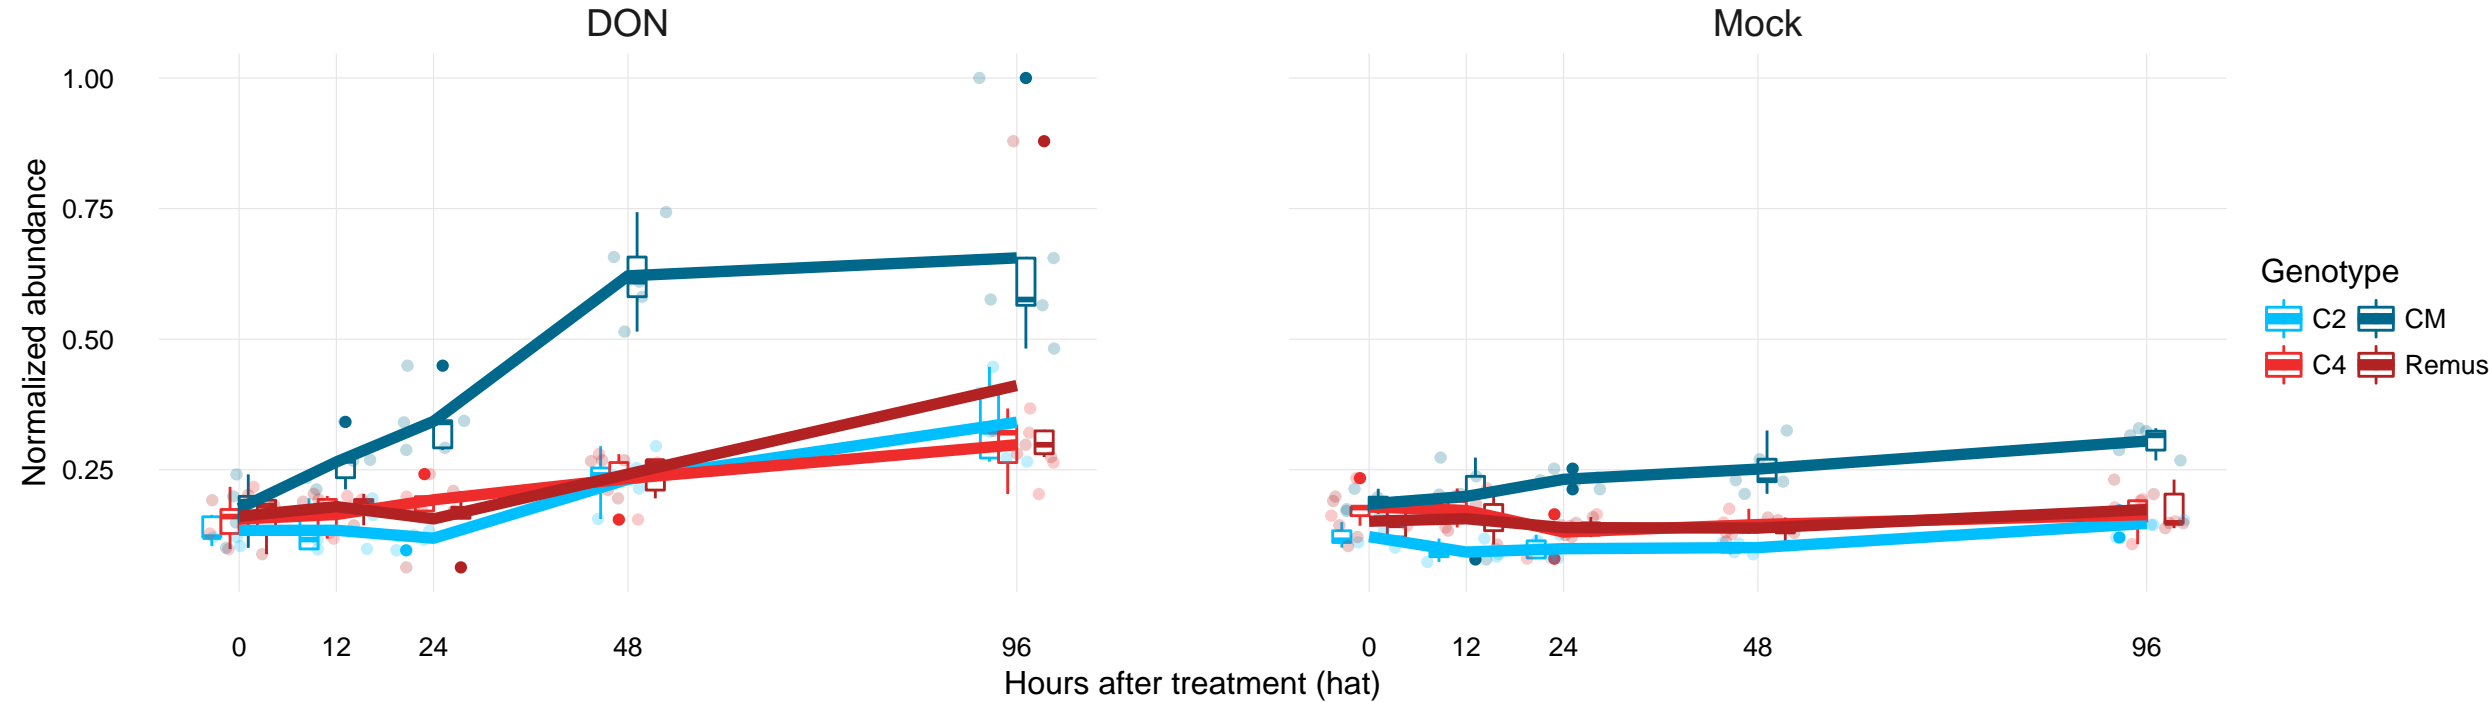

# A.111

Annotated as Flavonoid  
(21 database hits)

|                |                          |
|----------------|--------------------------|
| MZ             | 371.149                  |
| RT             | 17.93 min                |
| Normalization  | Directly via KPX samples |
| Cluster        | Cluster 3                |
| Cn total / Phe | 21 /                     |

## C2, C4; different treatments

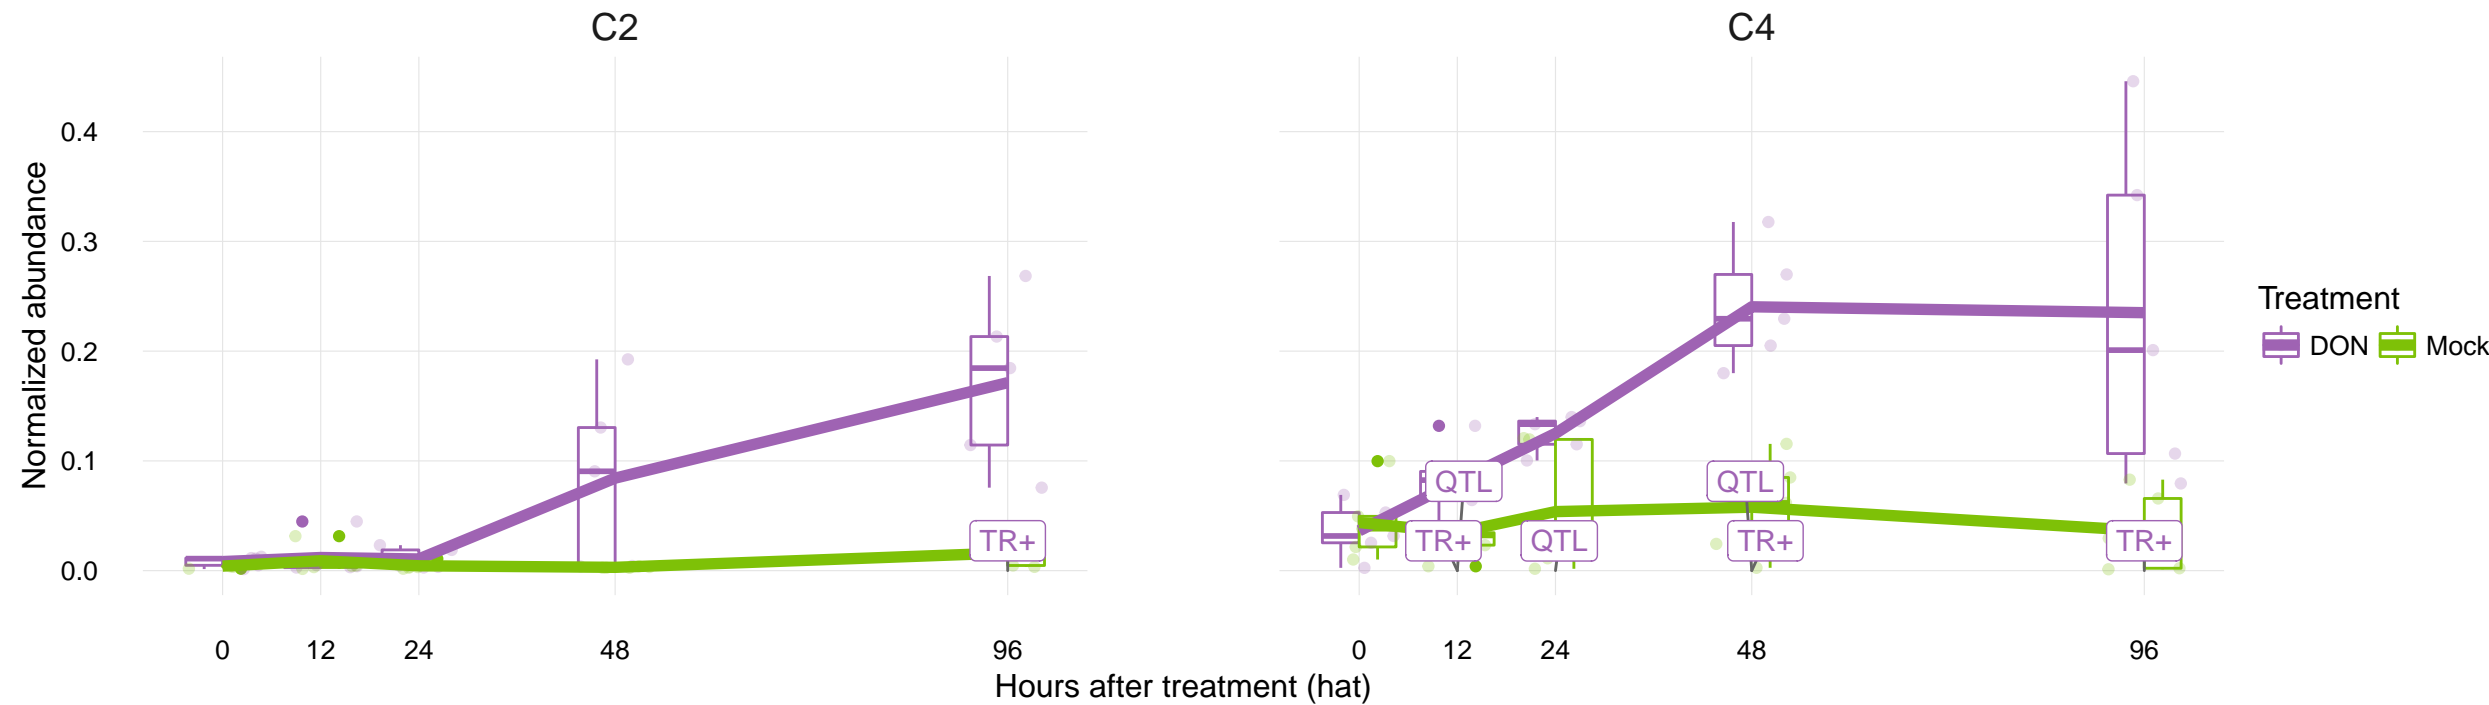

## DON, Mock; different genotypes

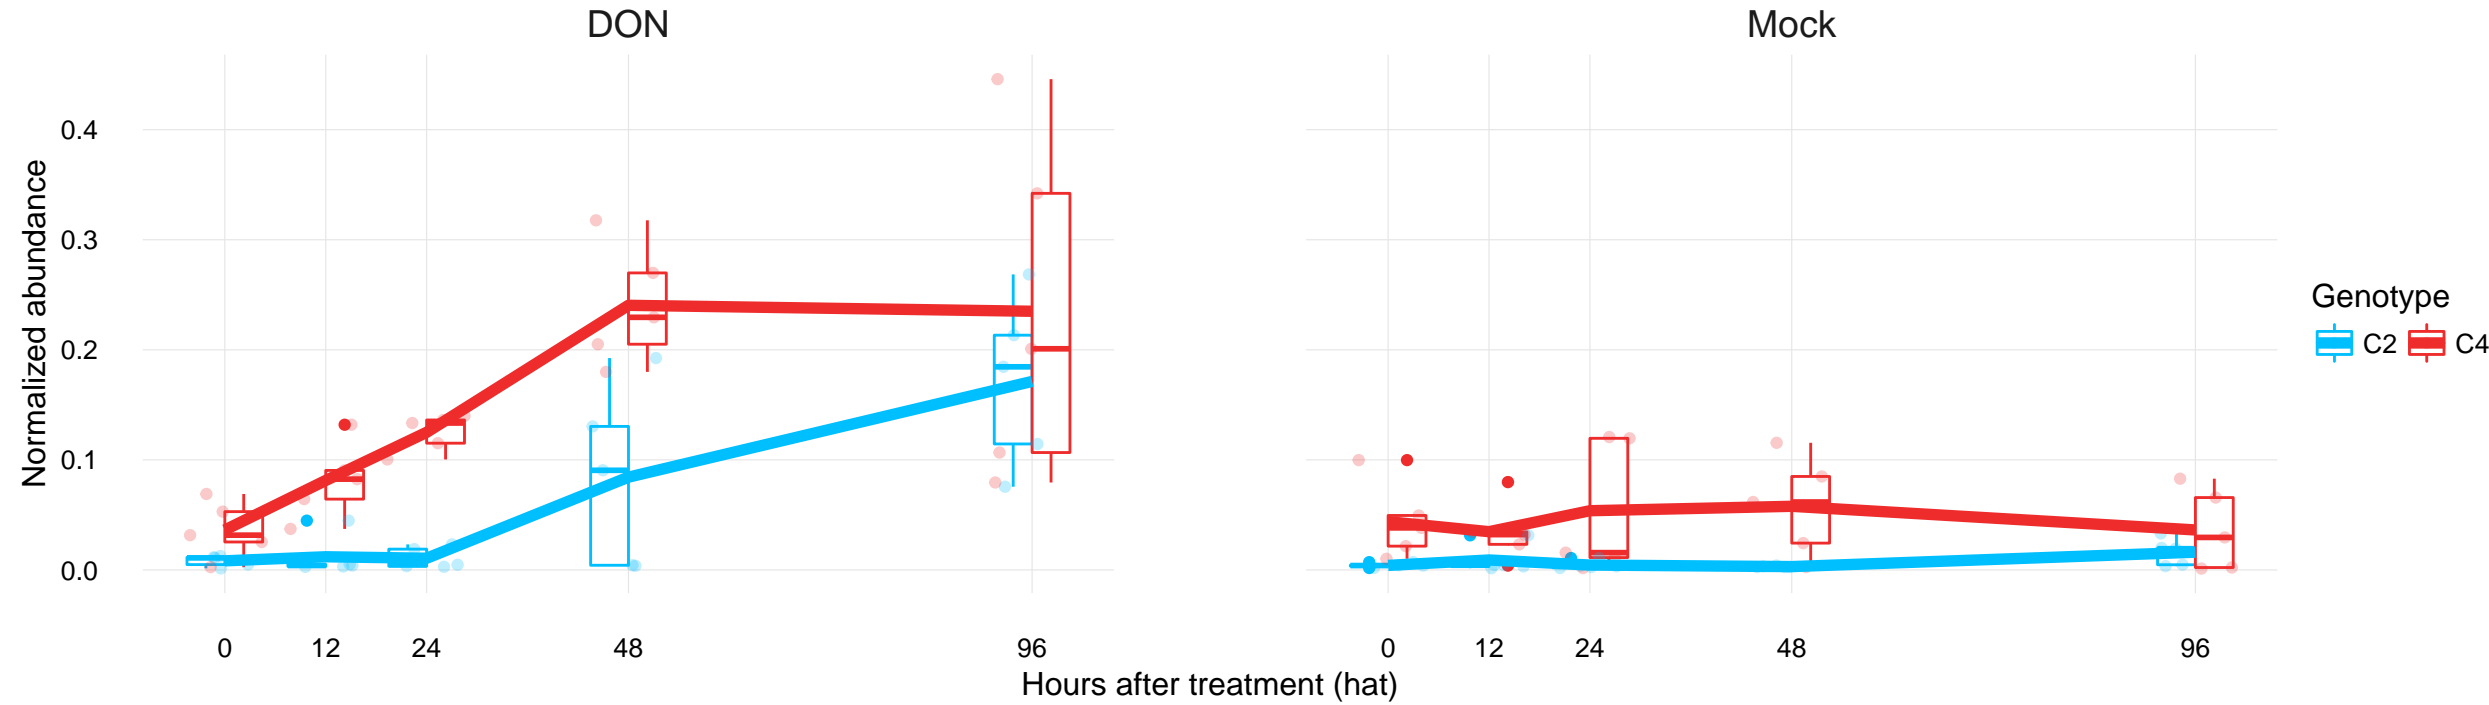

## CM, Remus; different treatments

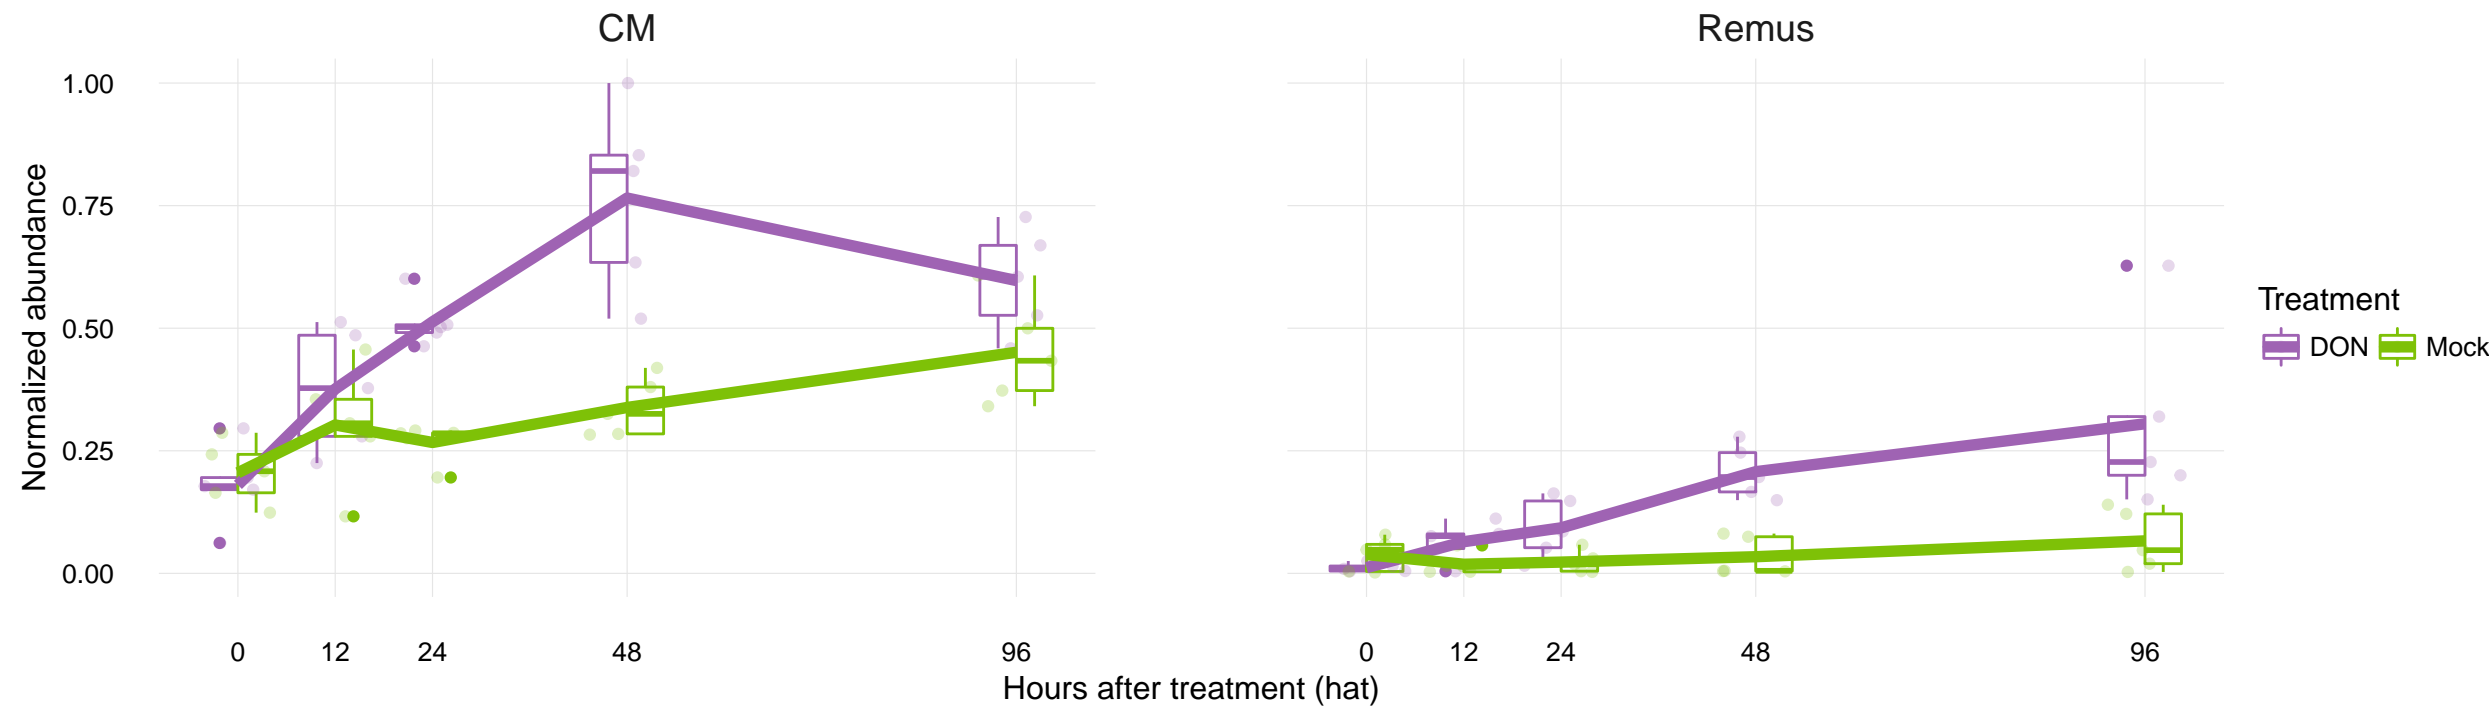

## DON, Mock; all four genotypes

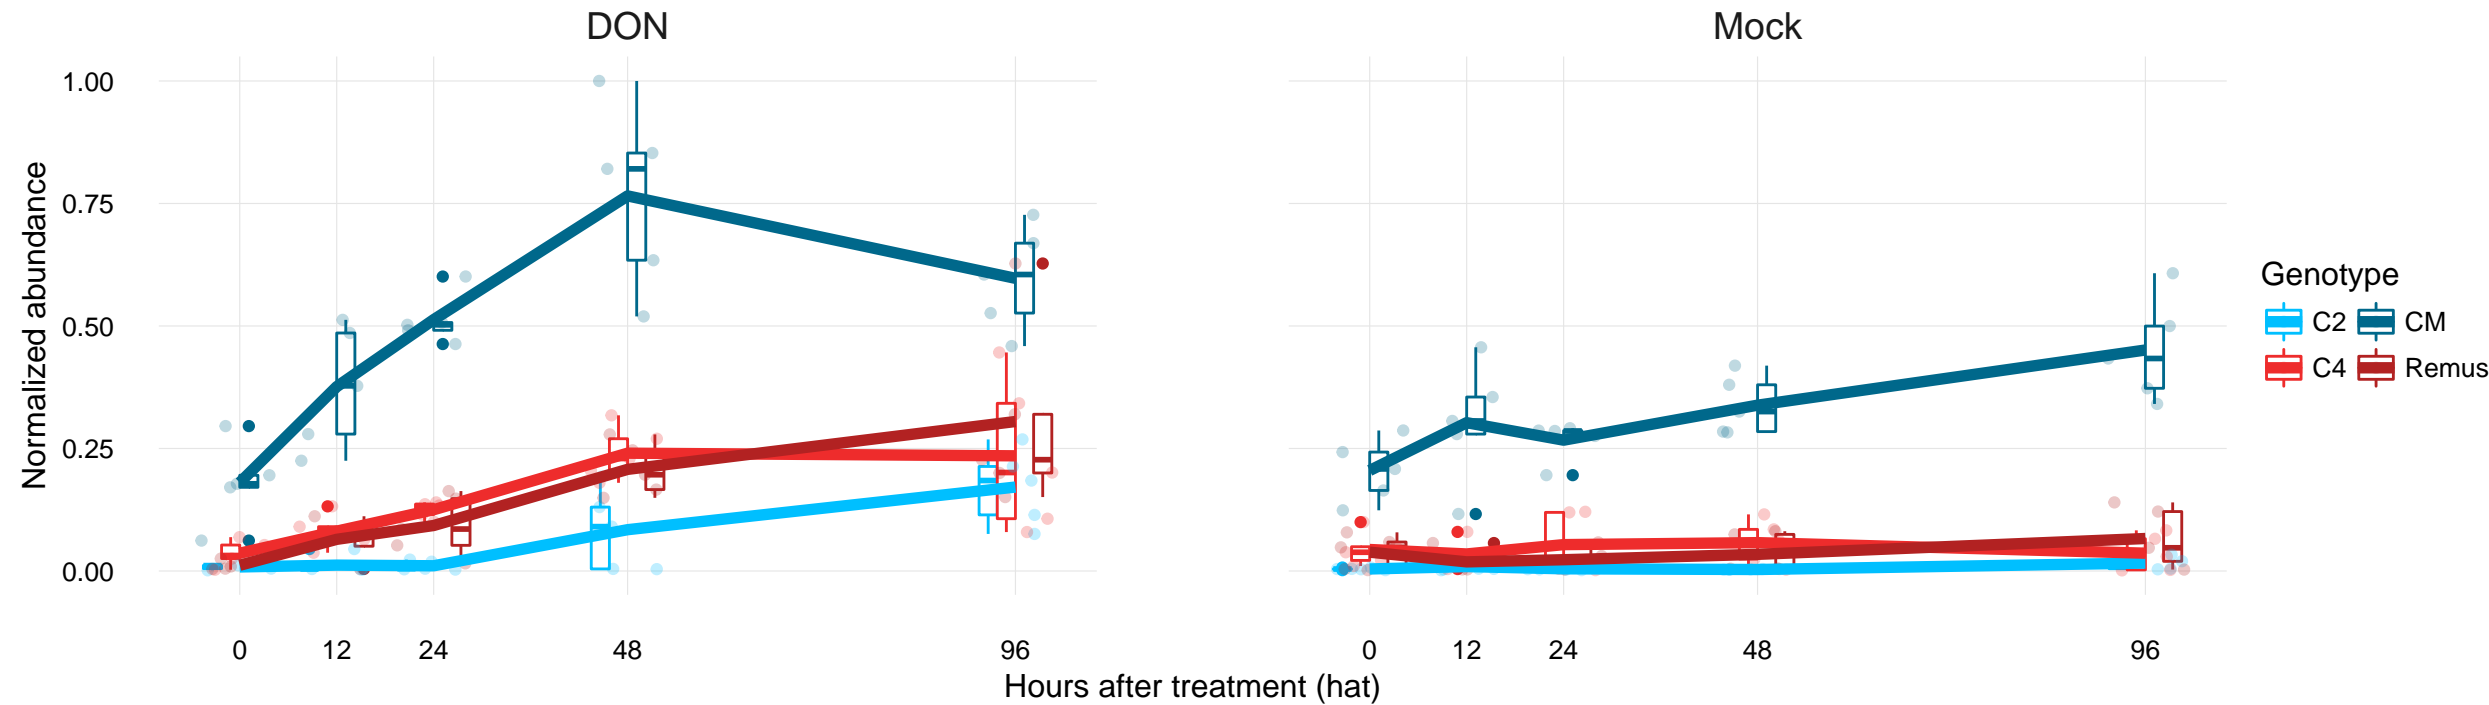

# A.99

Annotated as others (Coumarins)  
(1 database hit)

|                |                          |
|----------------|--------------------------|
| MZ             | 399.1413                 |
| RT             | 16.5 min                 |
| Normalization  | Directly via KPX samples |
| Cluster        | Cluster 3                |
| Cn total / Phe | 20 /                     |

## C2, C4; different treatments

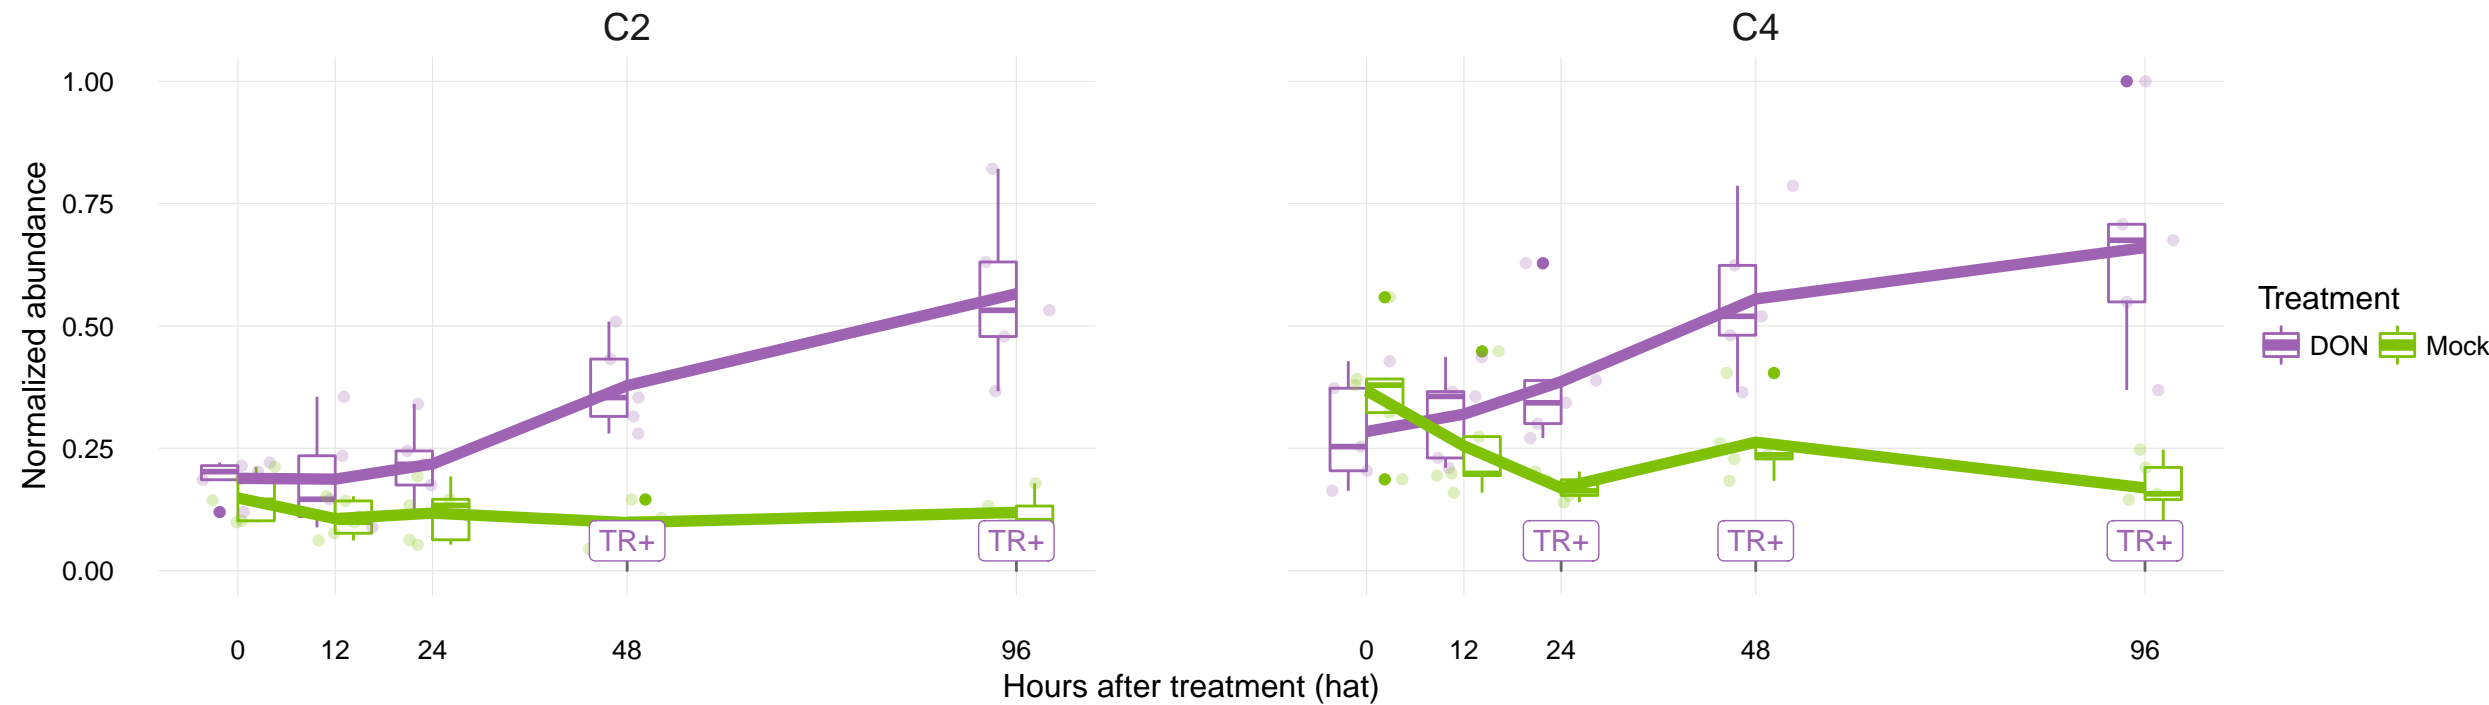

## DON, Mock; different genotypes

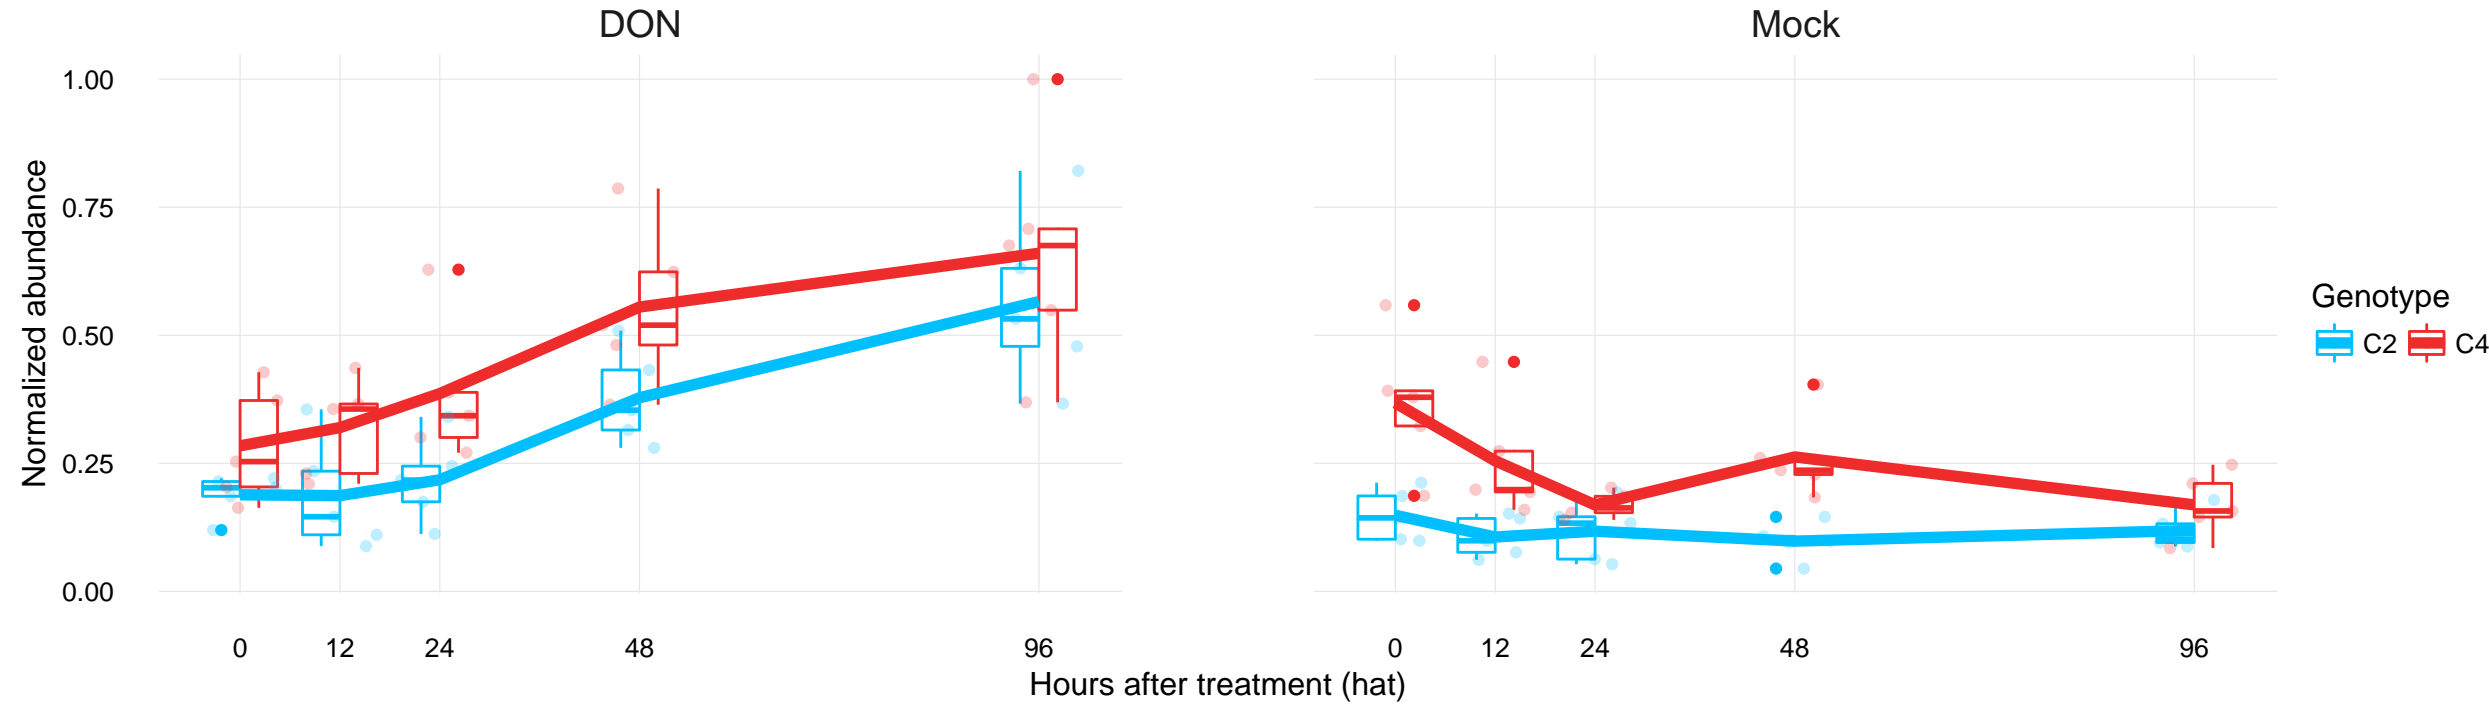

## CM, Remus; different treatments

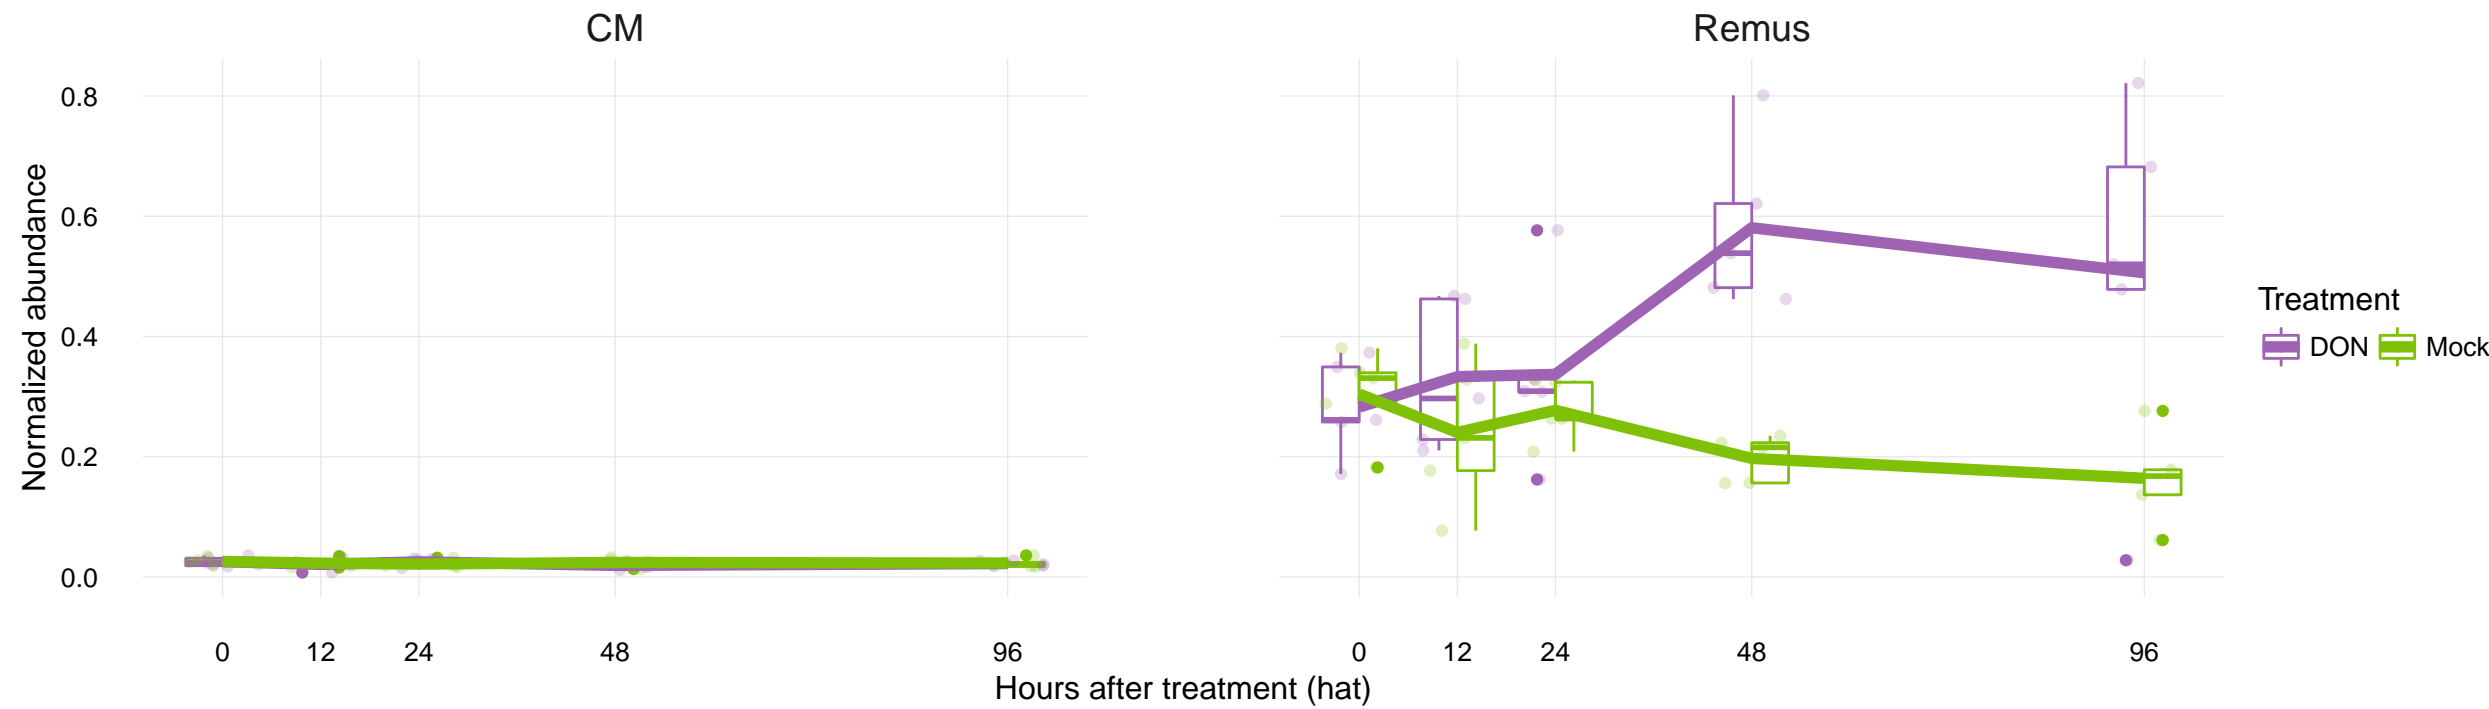

## DON, Mock; all four genotypes

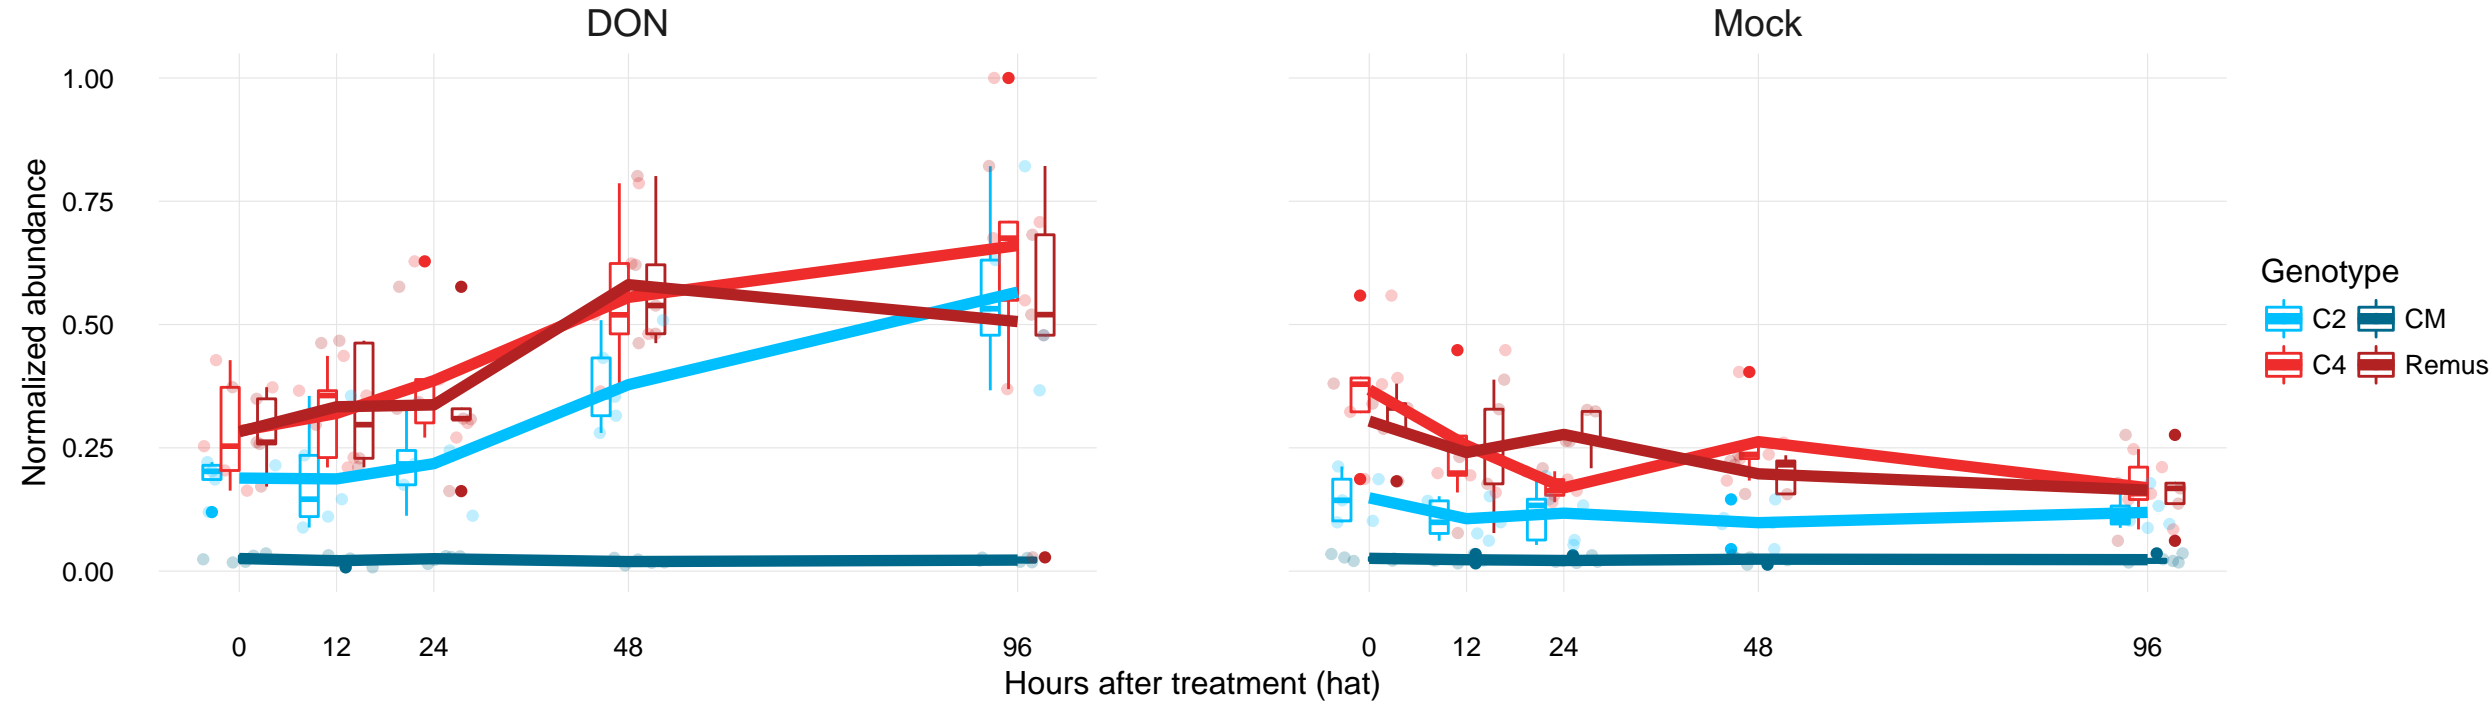

# A.75

Annotated as Flavonoid  
(30 database hits)

|                |                          |
|----------------|--------------------------|
| MZ             | 341.1386                 |
| RT             | 13.98 min                |
| Normalization  | Directly via KPX samples |
| Cluster        | Cluster 3                |
| Cn total / Phe | 20 / 9                   |

## C2, C4; different treatments

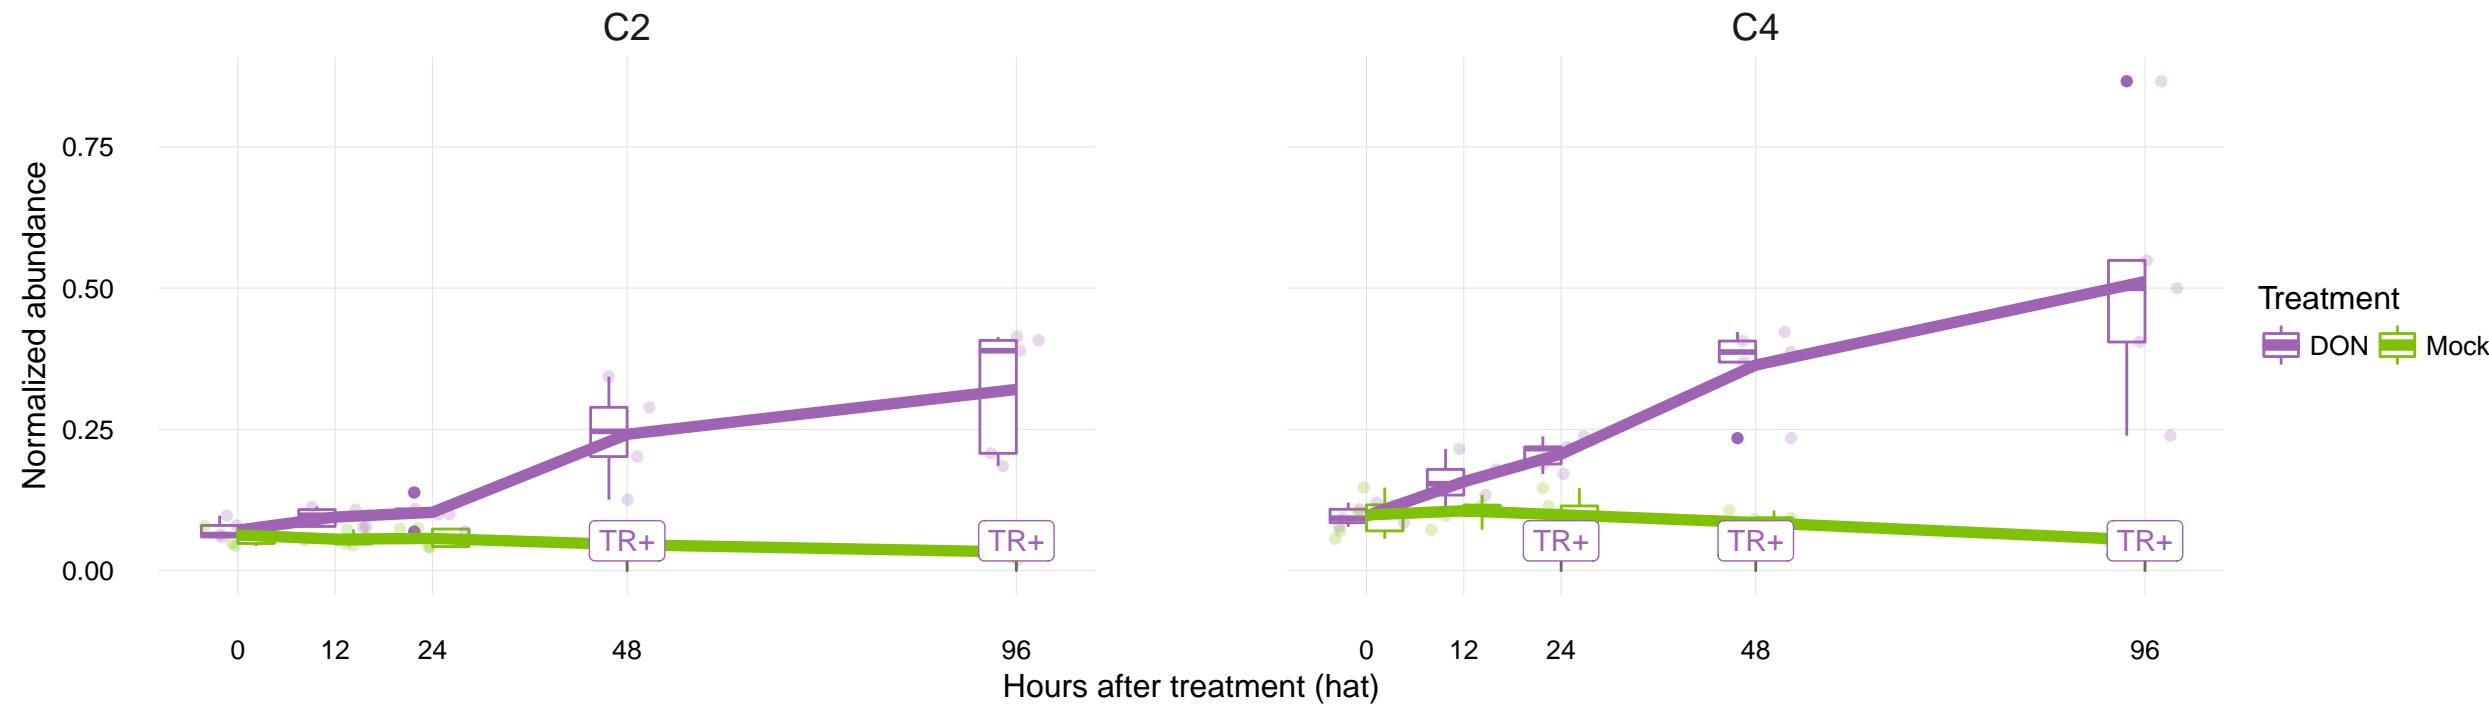

## DON, Mock; different genotypes

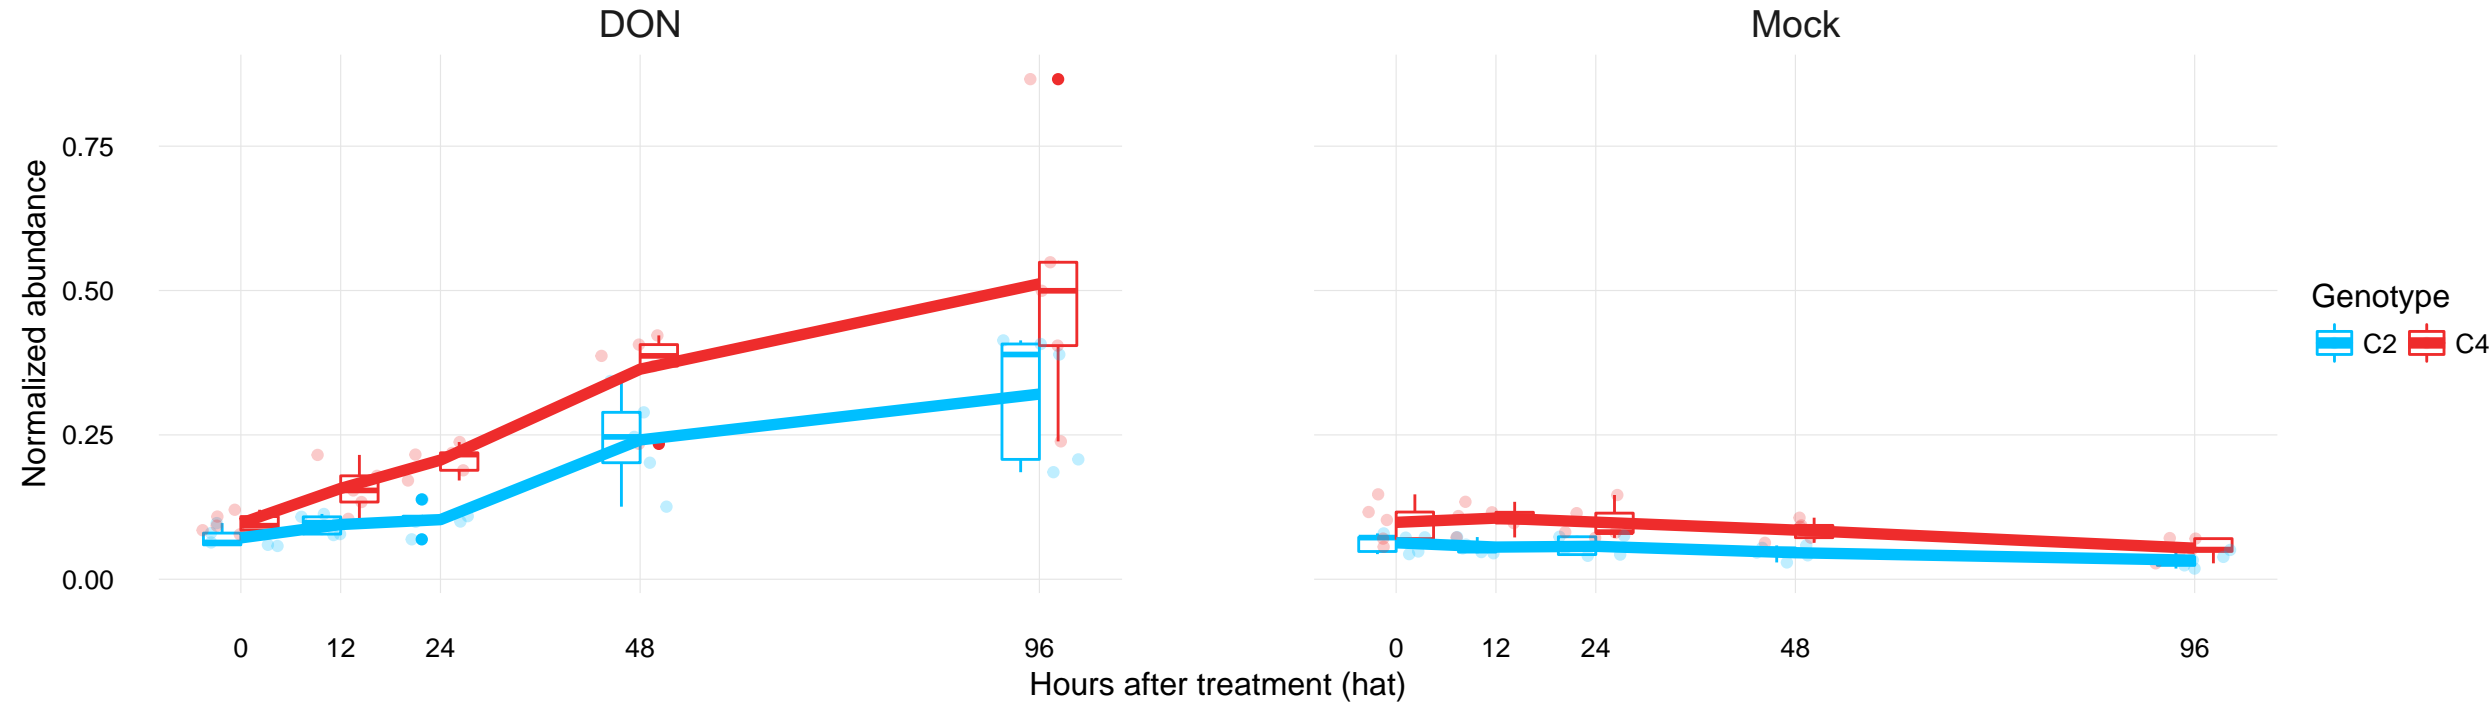

## CM, Remus; different treatments

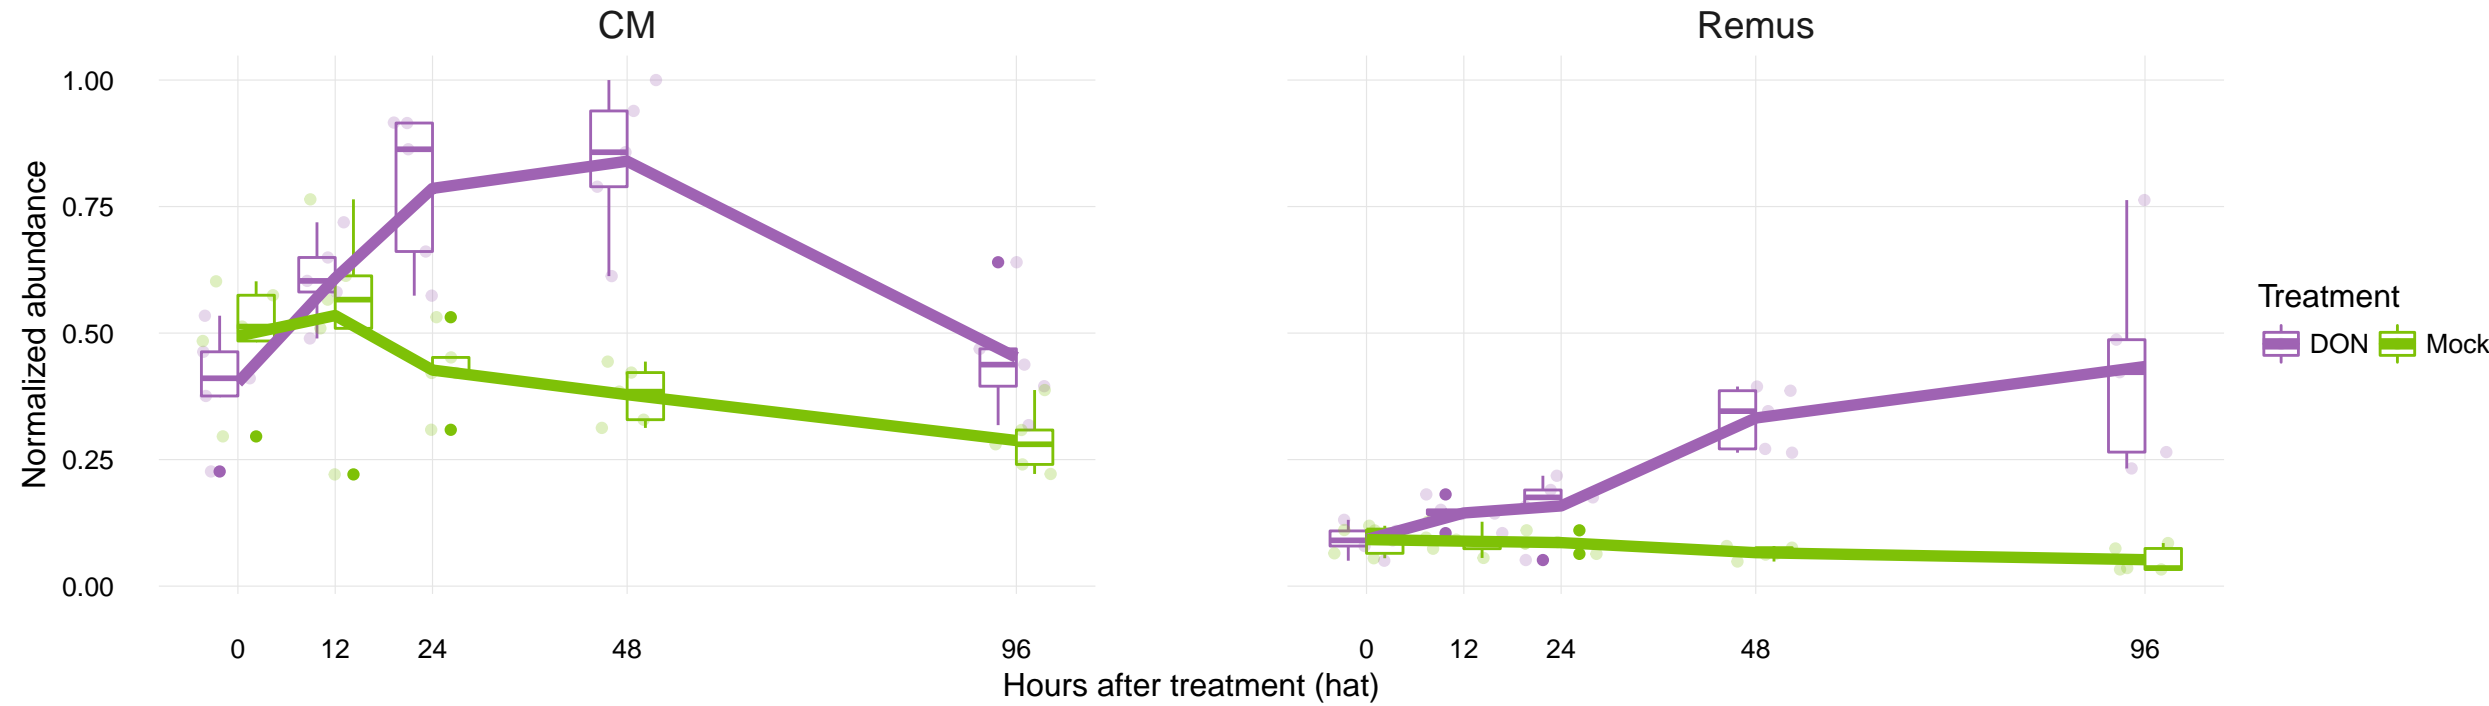

## DON, Mock; all four genotypes

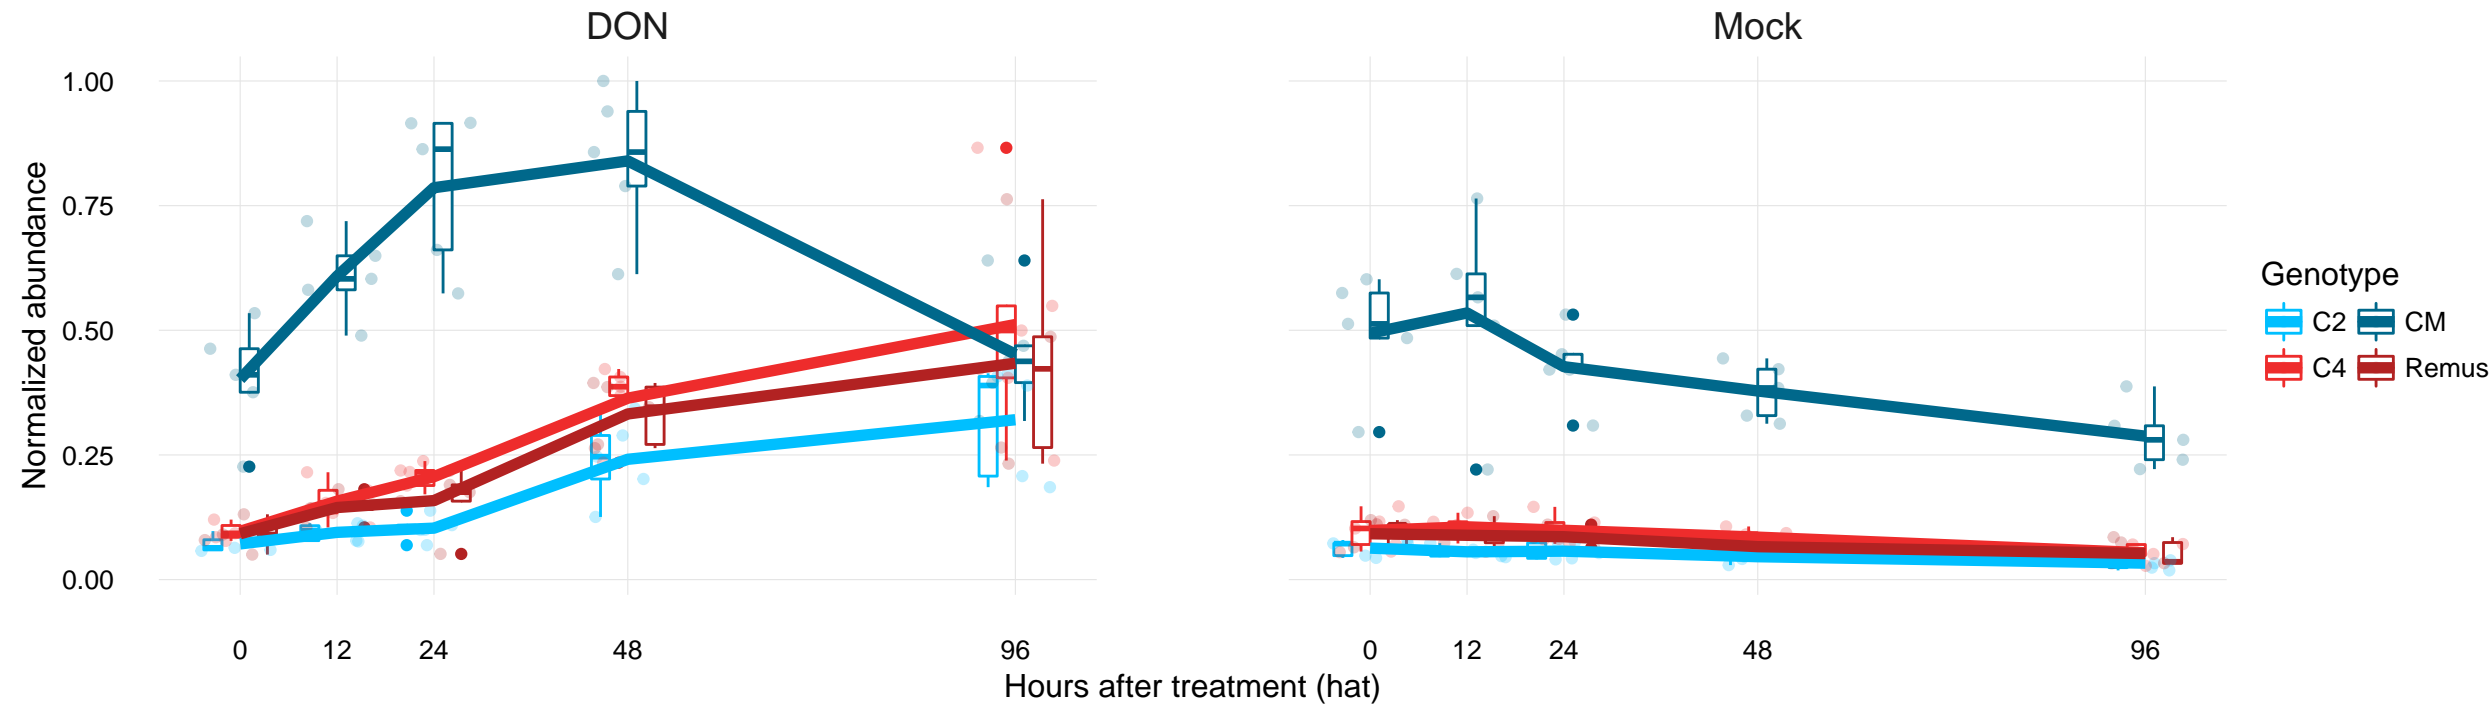



# A.44

Annotated as Lignan  
(2 database hits)

|                |                          |
|----------------|--------------------------|
| MZ             | 521.202                  |
| RT             | 11.2 min                 |
| Normalization  | Directly via KPX samples |
| Cluster        | Cluster 3                |
| Cn total / Phe | 26 / 9                   |

## C2, C4; different treatments

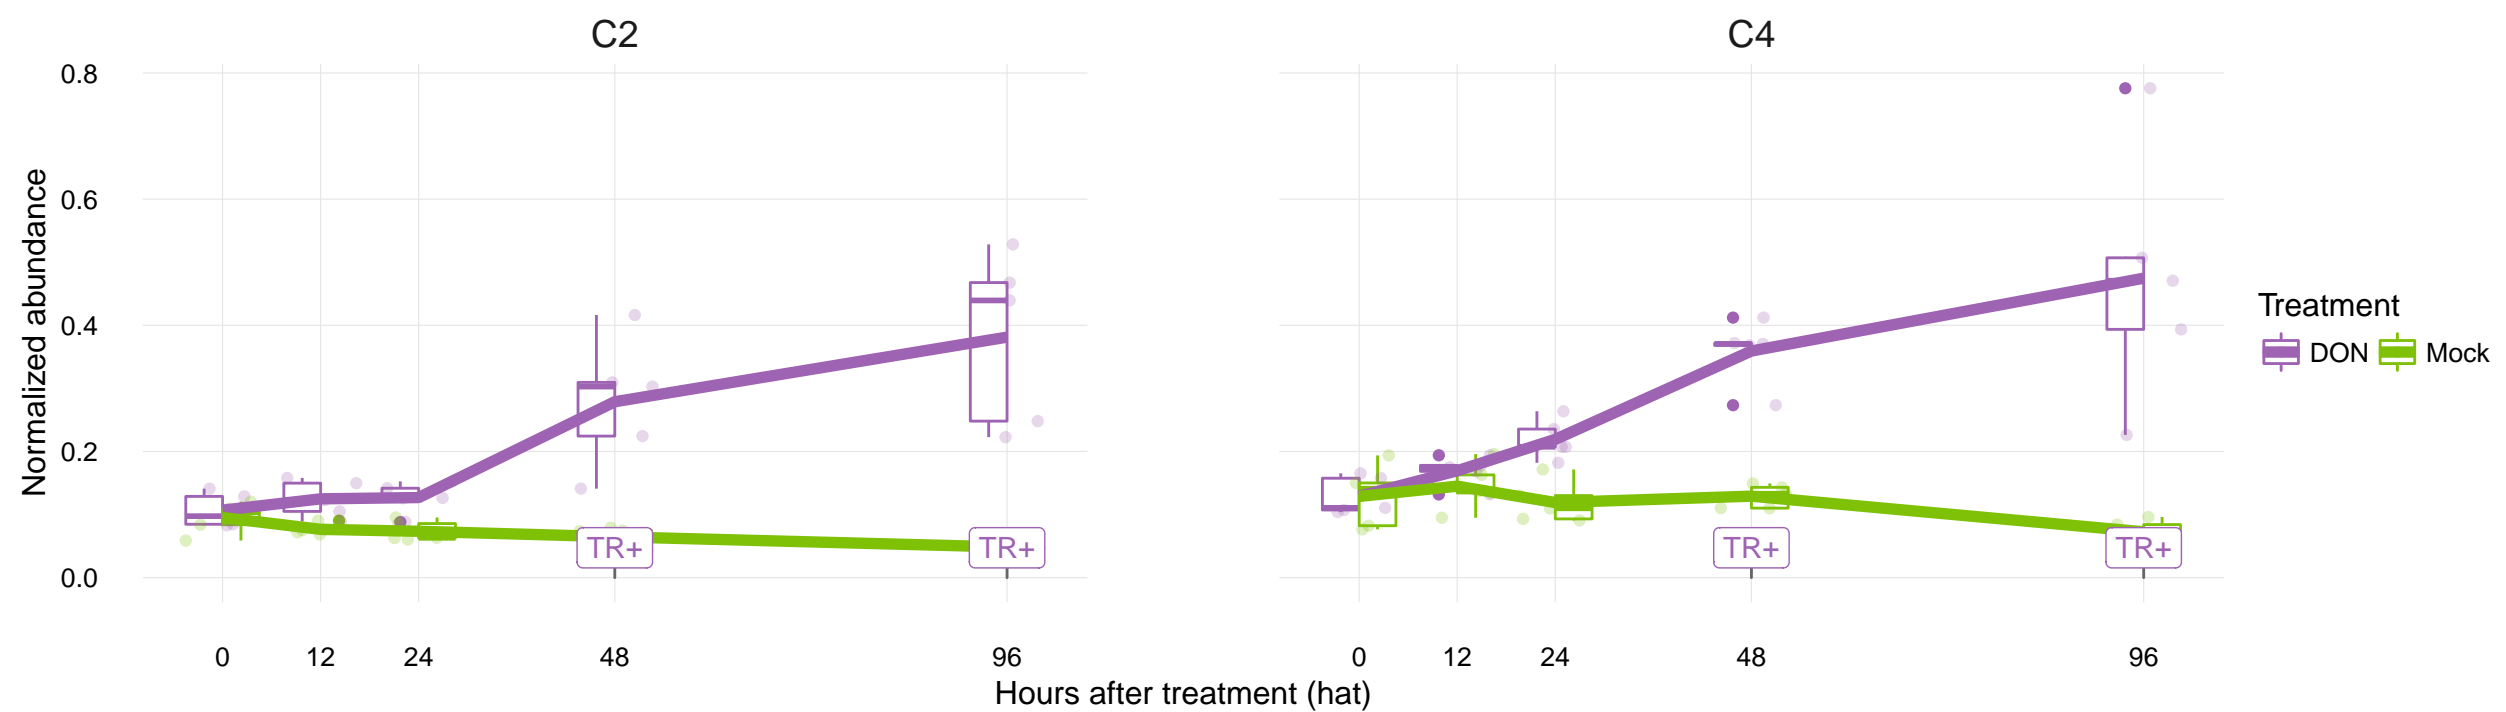

## DON, Mock; different genotypes

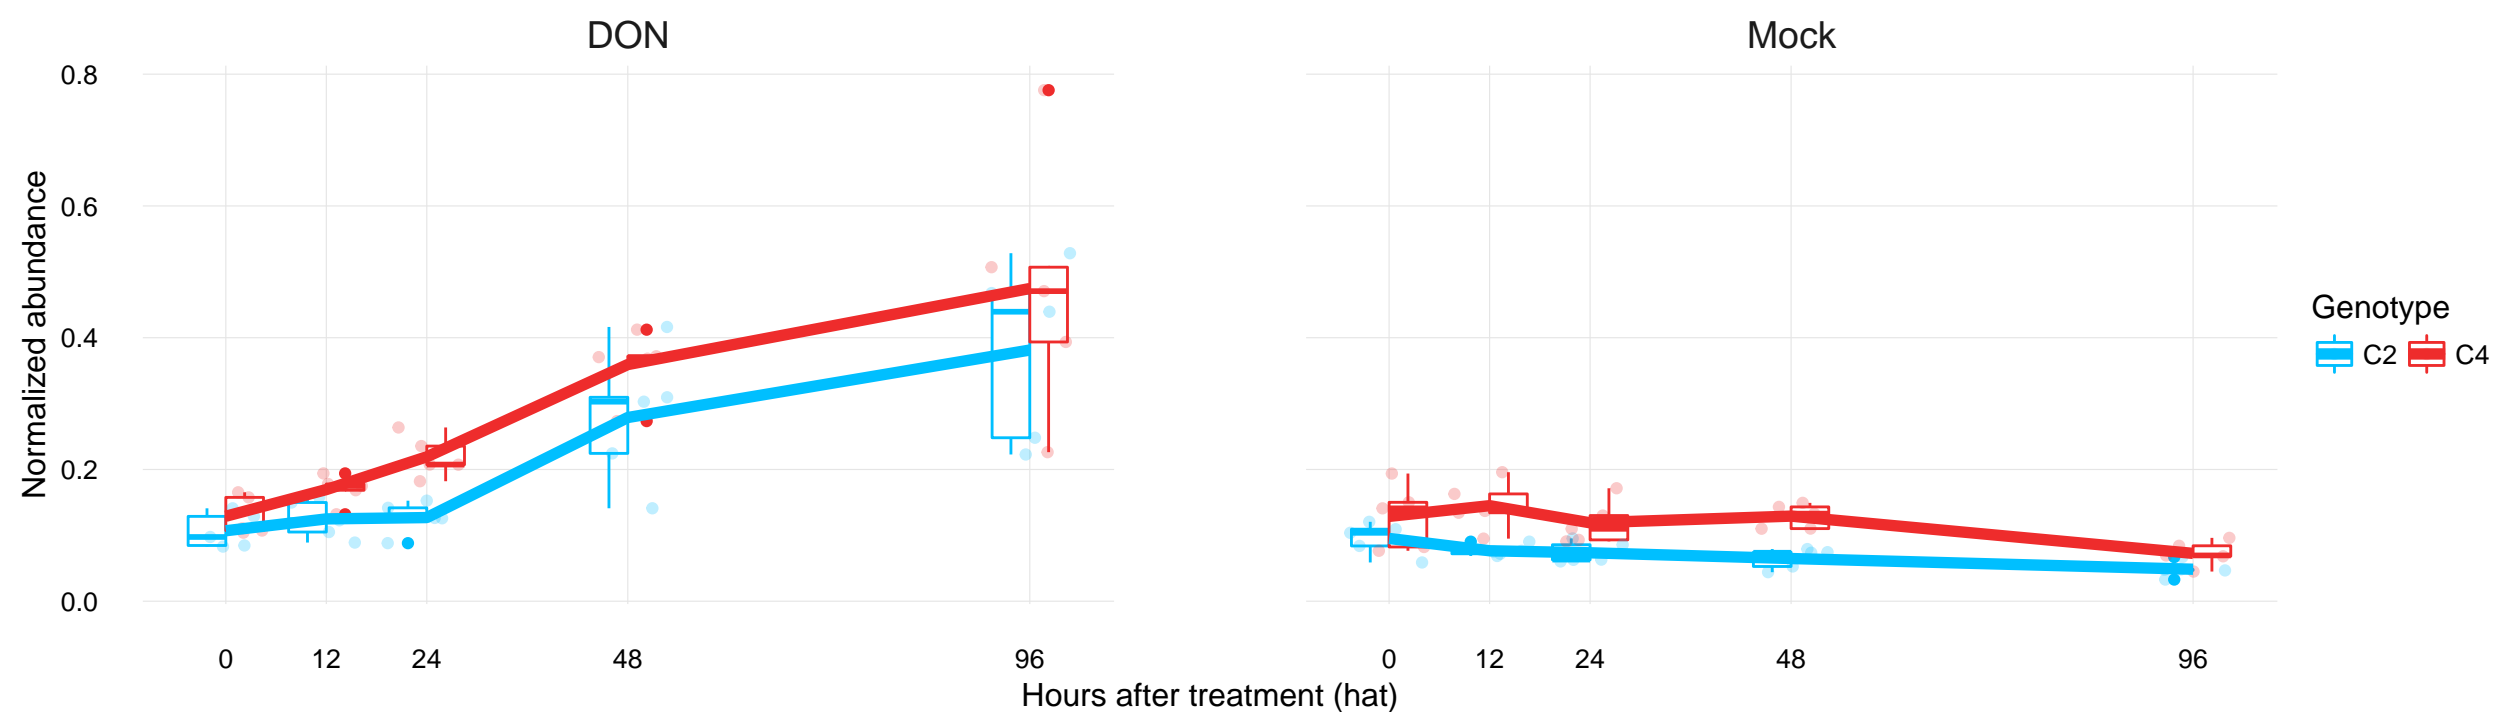

## CM, Remus; different treatments

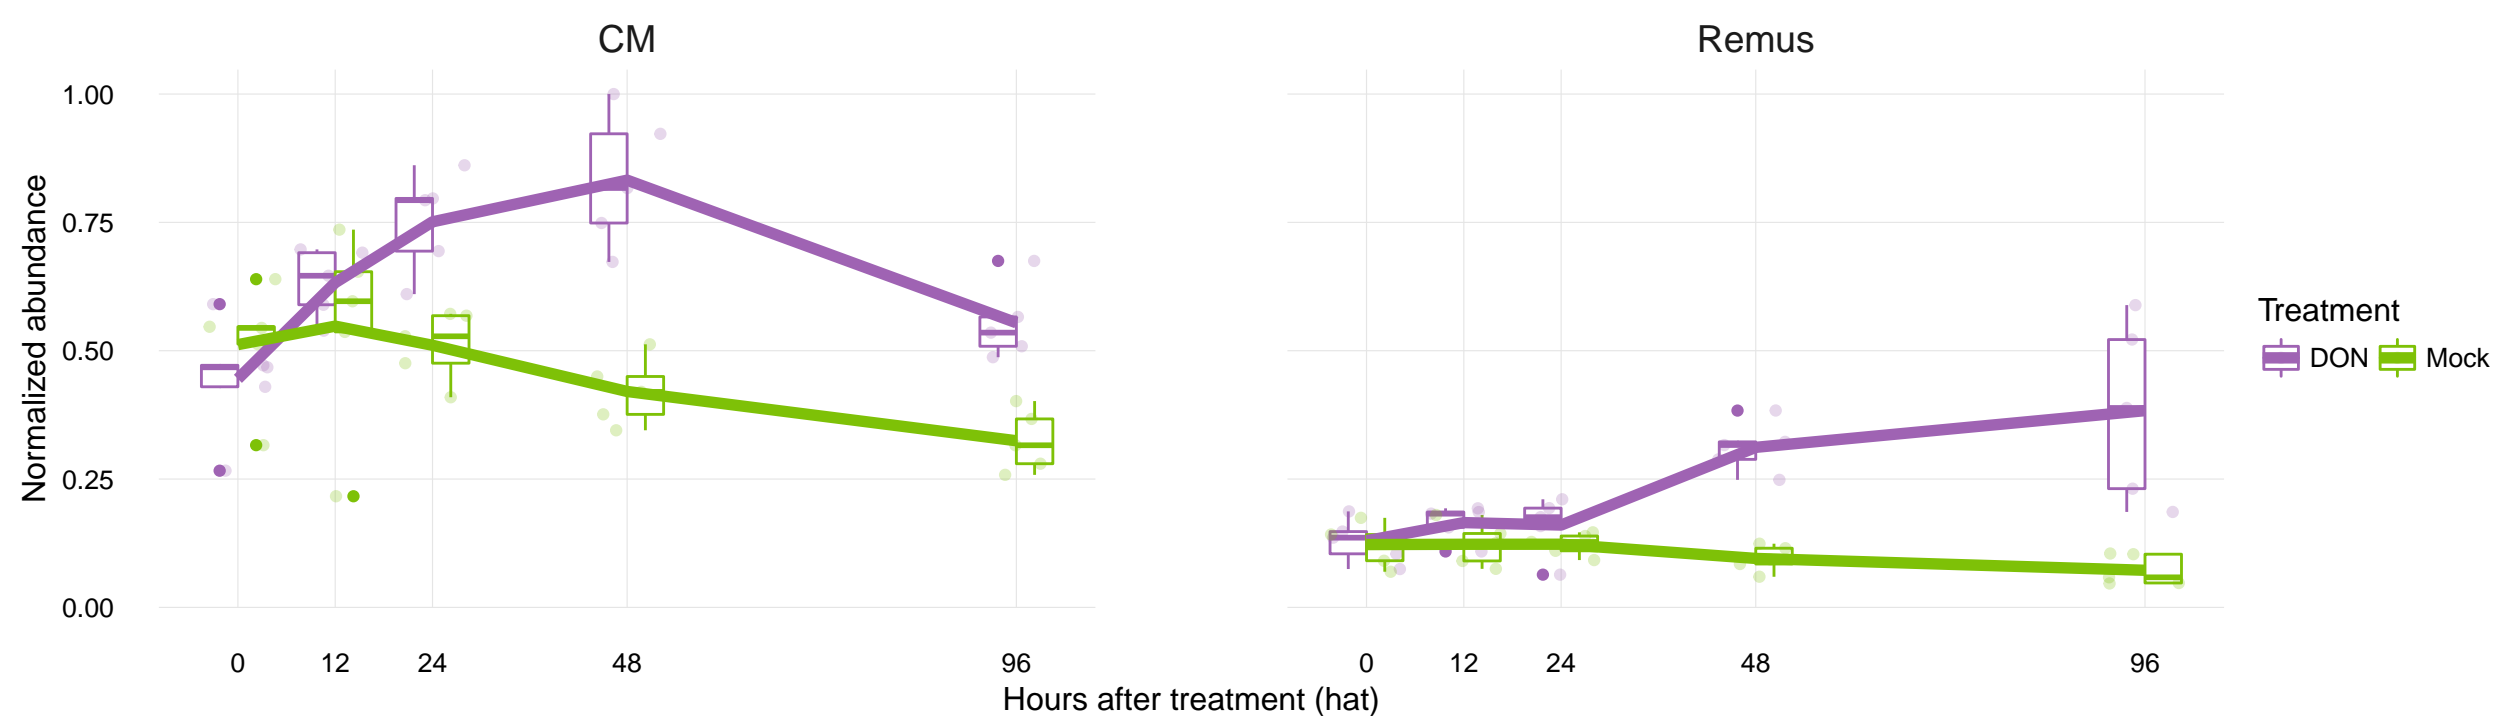

## DON, Mock; all four genotypes

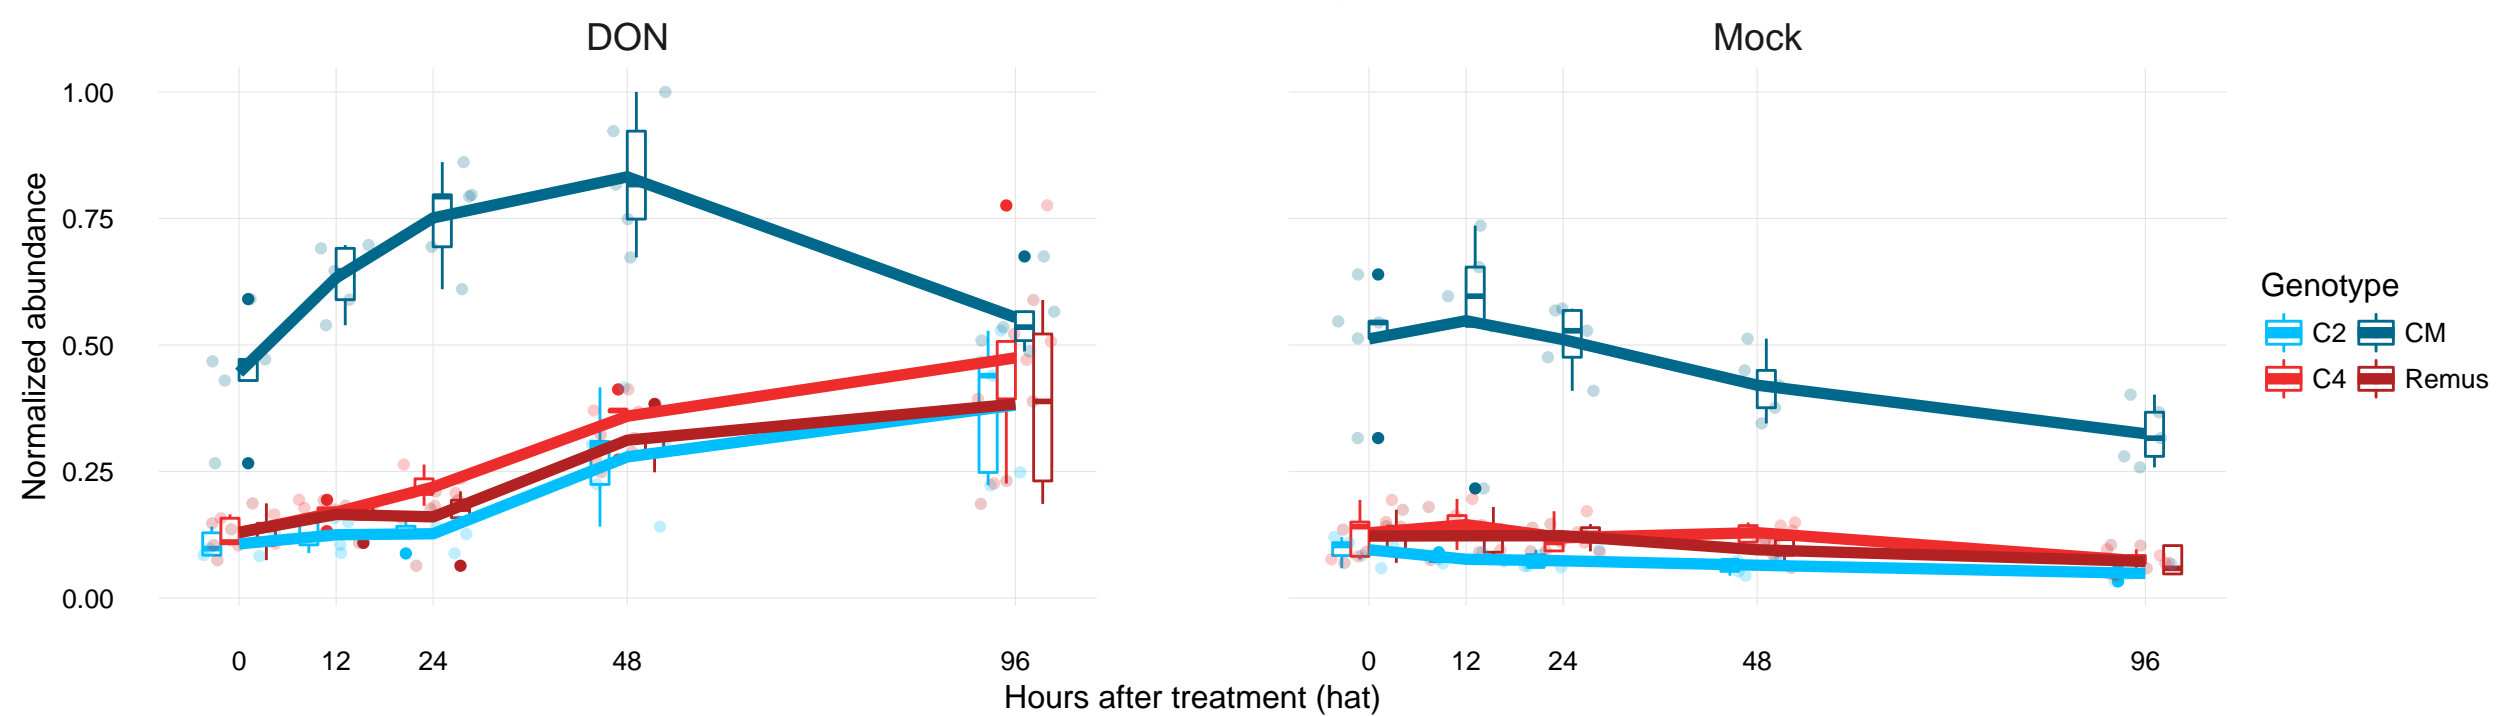

# A.102

Annotated as Putative benzoic acid derivative  
(1 database hit)

|                |                          |
|----------------|--------------------------|
| MZ             | 137.0597                 |
| RT             | 16.81 min                |
| Normalization  | Directly via KPX samples |
| Cluster        | Cluster 3                |
| Cn total / Phe | 8 / 7                    |

## C2, C4; different treatments

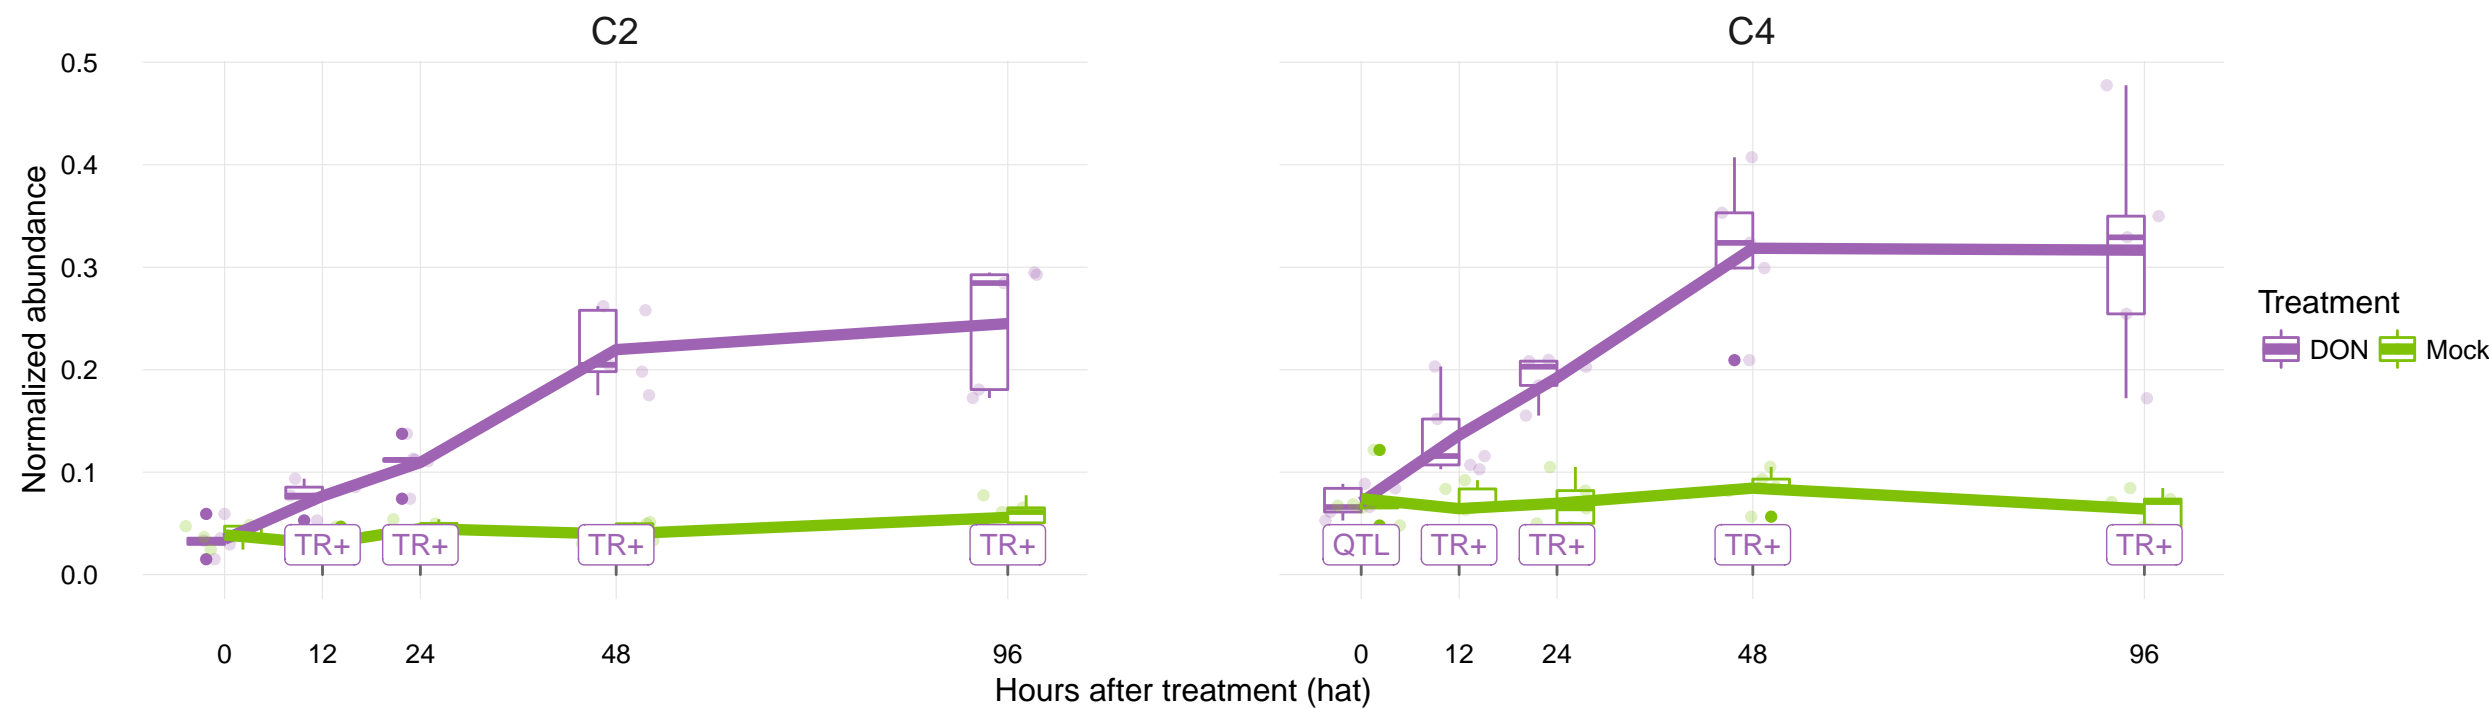

## DON, Mock; different genotypes

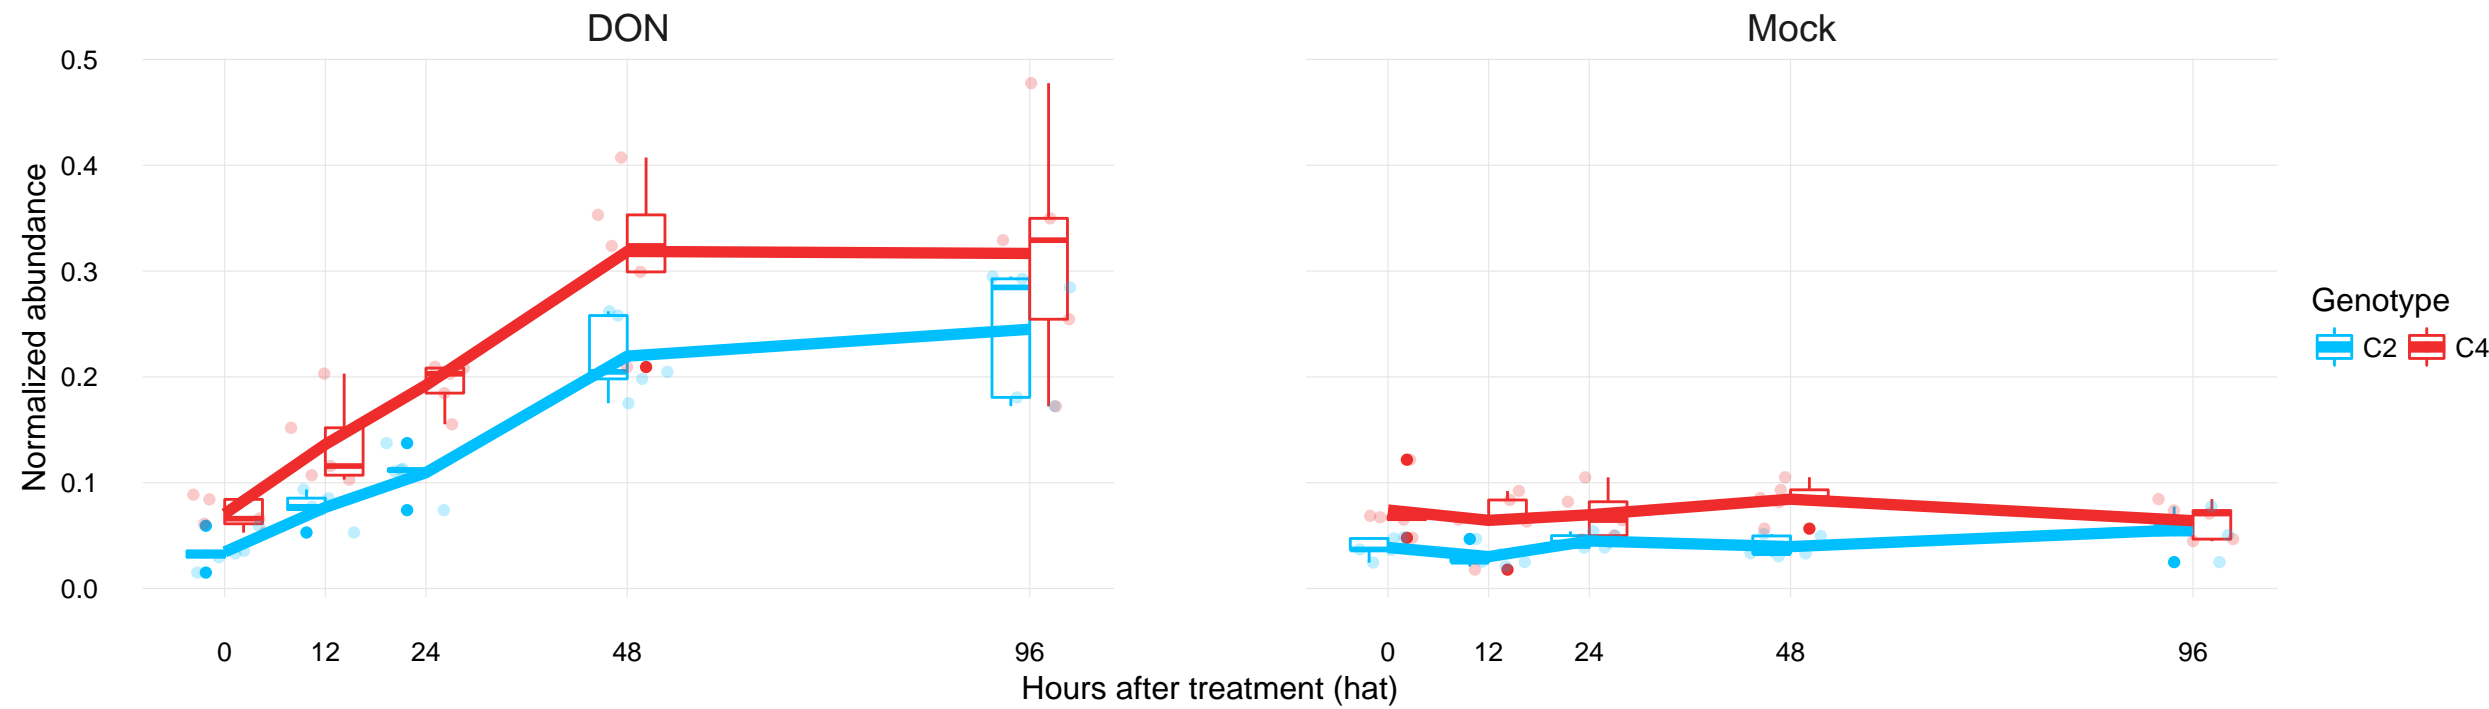

## CM, Remus; different treatments

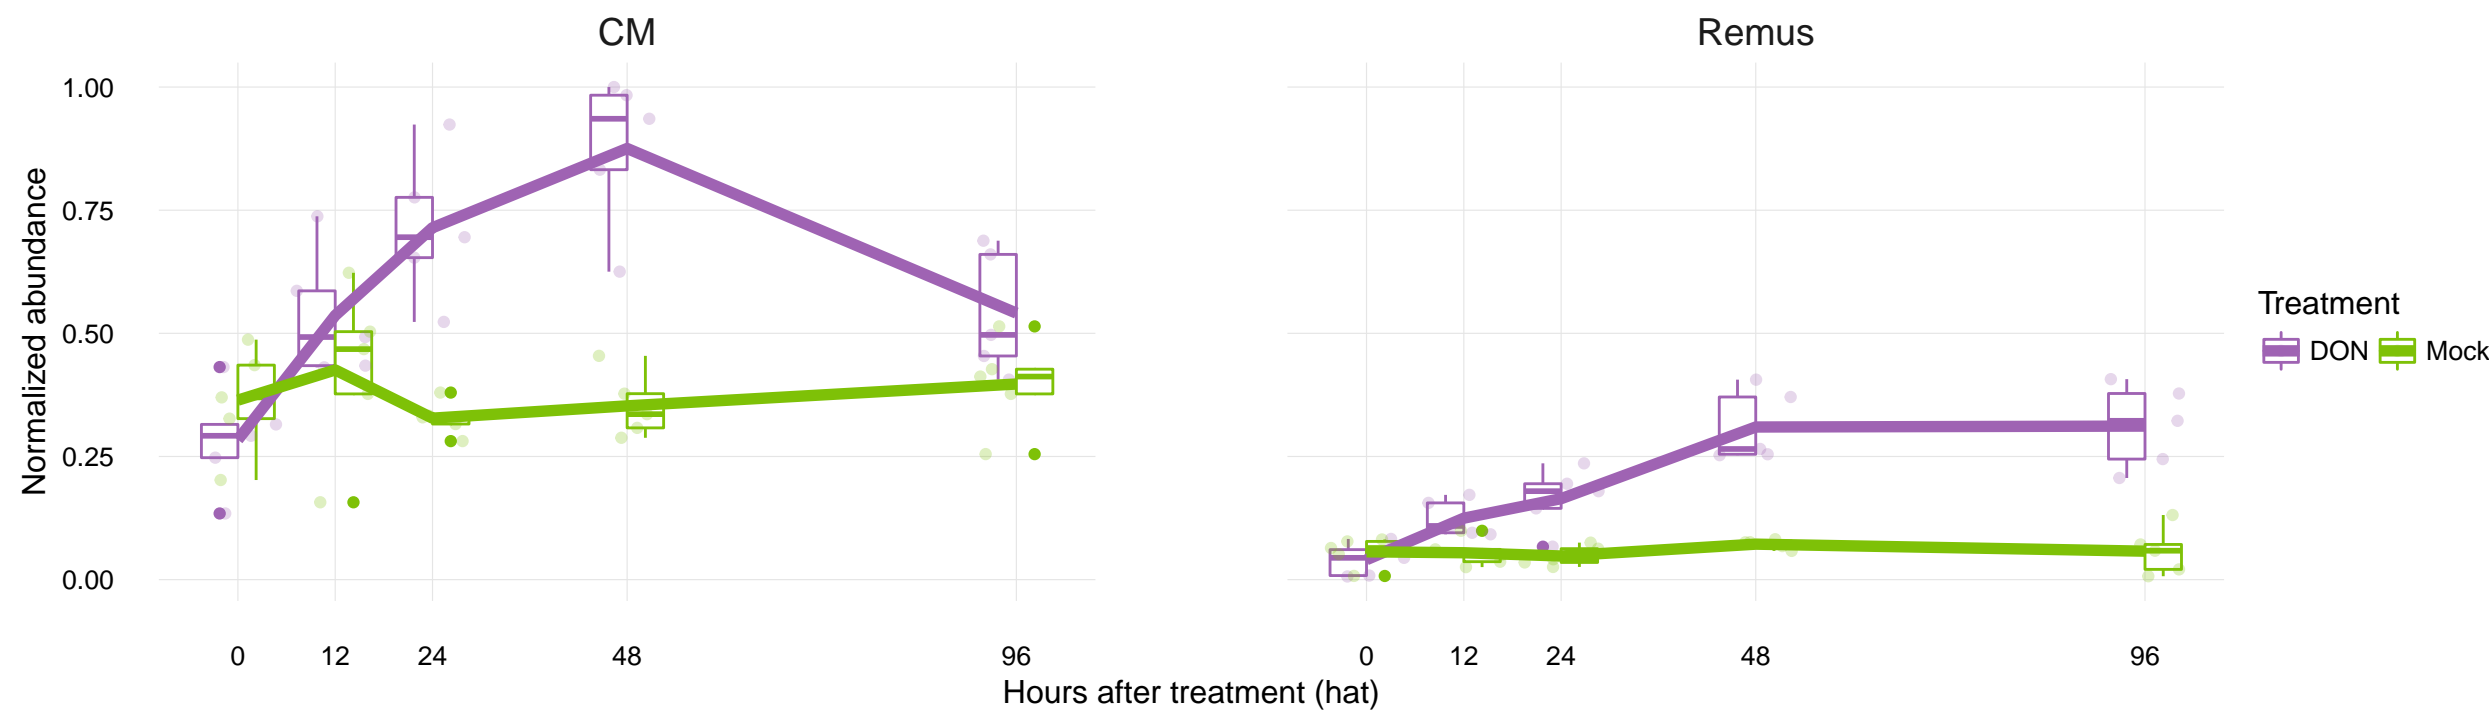

## DON, Mock; all four genotypes

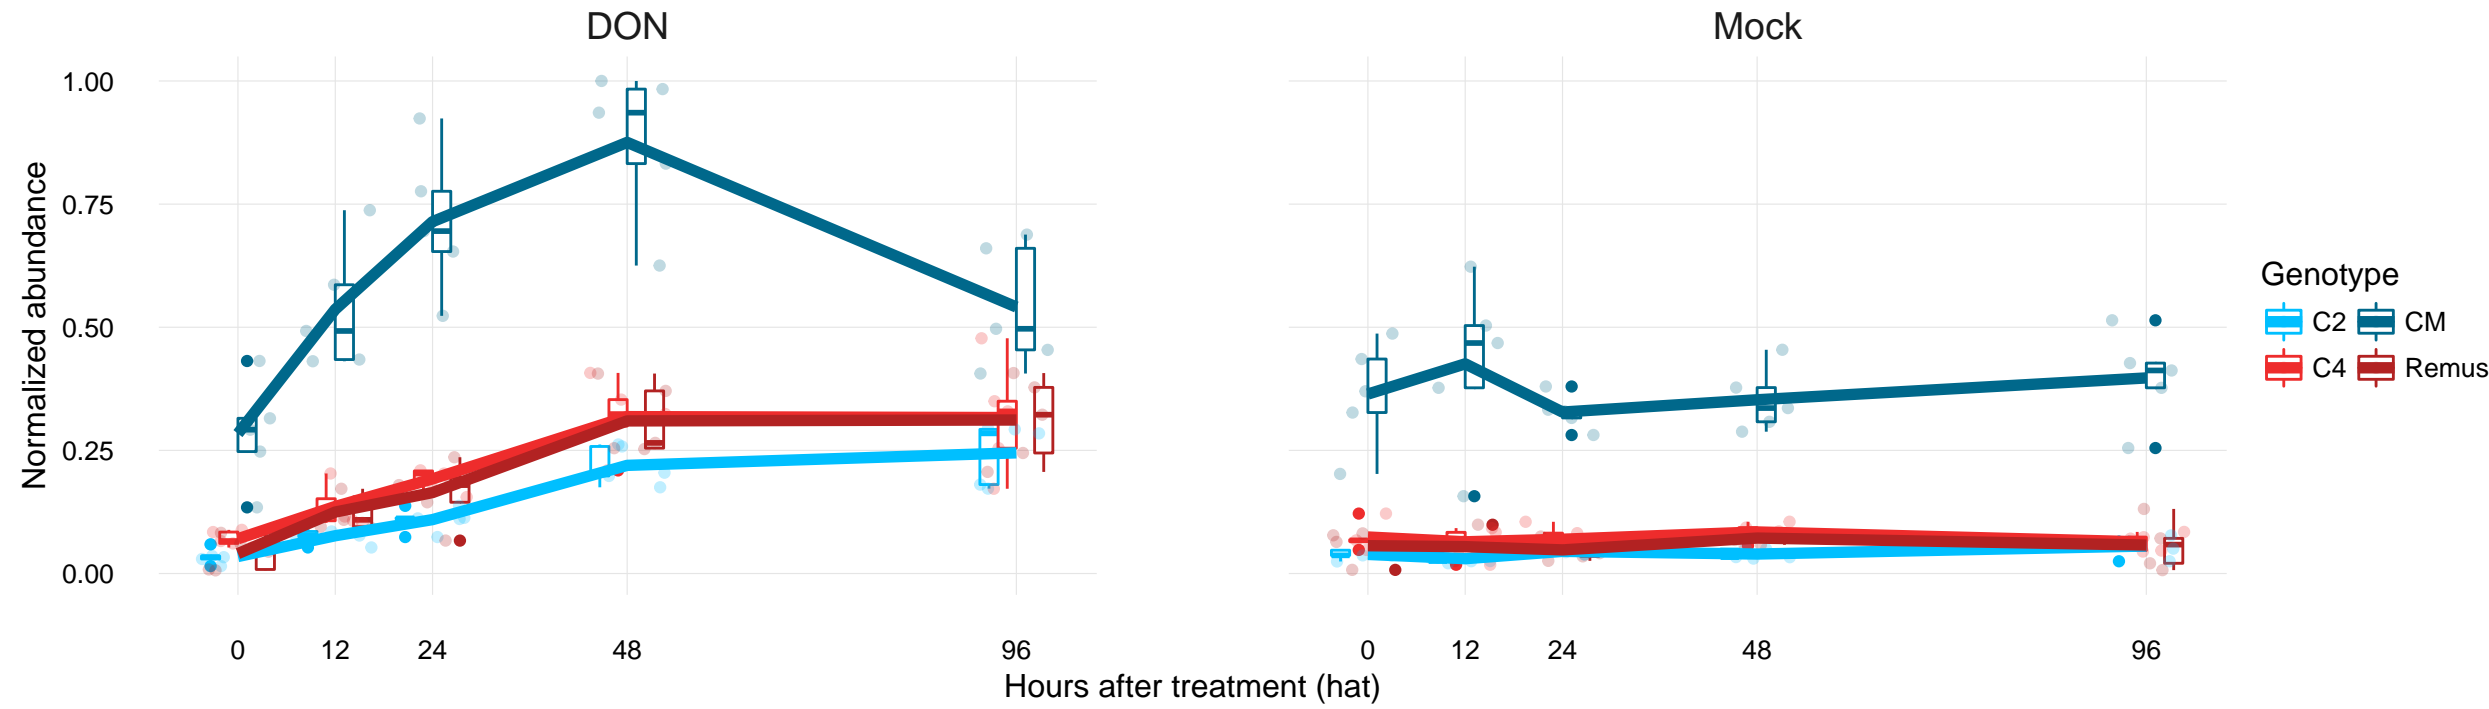

Supplement: Supplementary file [file 18162098]
